# Supplementary material for: The RNA-binding protein SFPQ preserves long-intron splicing and regulates circRNA biogenesis in mammals
Source: eLife. 2021 Jan 21;10:e63088. doi: 10.7554/eLife.63088 (PMC7819710; doi:10.7554/eLife.63088)
Supplement: Supplementary file 2. — List of ENCODE dataset accession numbers used in eCLIP analysis. [file elife-63088-supp2.xlsx]

## Sheet: HepG2
accession	assembly	dataset	biological_replicates	description
ENCFF506IYH	hg19	/experiments/ENCSR182AEG/	1	eCLIP control experiment on HepG2 against AGGF1
ENCFF036HIA	hg19	/experiments/ENCSR543TPH/	1	eCLIP experiment on HepG2 against AGGF1
ENCFF948TWD	hg19	/experiments/ENCSR543TPH/	2	eCLIP experiment on HepG2 against AGGF1
ENCFF008YNL	hg19	/experiments/ENCSR902XTJ/	1	eCLIP control experiment on HepG2 against AKAP1
ENCFF847SYN	hg19	/experiments/ENCSR356ZMO/	1	eCLIP experiment on HepG2 against AKAP1
ENCFF430MTS	hg19	/experiments/ENCSR356ZMO/	2	eCLIP experiment on HepG2 against AKAP1
ENCFF673RJW	hg19	/experiments/ENCSR716AKC/	1	eCLIP control experiment on HepG2 against AQR
ENCFF072DMC	hg19	/experiments/ENCSR018WPY/	1	eCLIP experiment on HepG2 against AQR
ENCFF615YND	hg19	/experiments/ENCSR018WPY/	2	eCLIP experiment on HepG2 against AQR
ENCFF487CAF	hg19	/experiments/ENCSR821VMD/	1	eCLIP control experiment on HepG2 against AUH
ENCFF616GRZ	hg19	/experiments/ENCSR334QFR/	1	eCLIP experiment on HepG2 against AUH
ENCFF856RPN	hg19	/experiments/ENCSR334QFR/	2	eCLIP experiment on HepG2 against AUH
ENCFF421BZA	hg19	/experiments/ENCSR655BRZ/	1	eCLIP control experiment on HepG2 against BCCIP
ENCFF731PYG	hg19	/experiments/ENCSR485QCG/	1	eCLIP experiment on HepG2 against BCCIP
ENCFF005HRW	hg19	/experiments/ENCSR485QCG/	2	eCLIP experiment on HepG2 against BCCIP
ENCFF291XOO	hg19	/experiments/ENCSR128BUO/	1	eCLIP control experiment on HepG2 against BCLAF1
ENCFF376EDQ	hg19	/experiments/ENCSR876EYA/	1	eCLIP experiment on HepG2 against BCLAF1
ENCFF139XGO	hg19	/experiments/ENCSR876EYA/	2	eCLIP experiment on HepG2 against BCLAF1
ENCFF624JXG	hg19	/experiments/ENCSR777PDA/	1	eCLIP control experiment on HepG2 against BUD13
ENCFF592BEM	hg19	/experiments/ENCSR830BSQ/	1	eCLIP experiment on HepG2 against BUD13
ENCFF094VWE	hg19	/experiments/ENCSR830BSQ/	2	eCLIP experiment on HepG2 against BUD13
ENCFF656NLF	hg19	/experiments/ENCSR828ALT/	1	eCLIP control experiment on HepG2 against CDC40
ENCFF171MEK	hg19	/experiments/ENCSR815VVI/	1	eCLIP experiment on HepG2 against CDC40
ENCFF282MQX	hg19	/experiments/ENCSR815VVI/	2	eCLIP experiment on HepG2 against CDC40
ENCFF836AYV	hg19	/experiments/ENCSR309GHK/	1	eCLIP control experiment on HepG2 against CSTF2
ENCFF175HHG	hg19	/experiments/ENCSR384MWO/	1	eCLIP experiment on HepG2 against CSTF2
ENCFF103BFG	hg19	/experiments/ENCSR384MWO/	2	eCLIP experiment on HepG2 against CSTF2
ENCFF073SGO	hg19	/experiments/ENCSR391GLS/	1	eCLIP control experiment on HepG2 against CSTF2T
ENCFF268ECW	hg19	/experiments/ENCSR919HSE/	1	eCLIP experiment on HepG2 against CSTF2T
ENCFF346HHC	hg19	/experiments/ENCSR919HSE/	2	eCLIP experiment on HepG2 against CSTF2T
ENCFF053HBF	hg19	/experiments/ENCSR240ZFU/	1	eCLIP control experiment on HepG2 against DDX20
ENCFF440HUP	hg19	/experiments/ENCSR090VXV/	1	eCLIP control experiment on HepG2 against DDX3X
ENCFF984UNN	hg19	/experiments/ENCSR648LAH/	1	eCLIP experiment on HepG2 against DDX3X
ENCFF889OOU	hg19	/experiments/ENCSR648LAH/	2	eCLIP experiment on HepG2 against DDX3X
ENCFF943JVS	hg19	/experiments/ENCSR991LWQ/	1	eCLIP control experiment on HepG2 against DDX52
ENCFF879GTY	hg19	/experiments/ENCSR970FEW/	1	eCLIP experiment on HepG2 against DDX52
ENCFF356MCF	hg19	/experiments/ENCSR970FEW/	2	eCLIP experiment on HepG2 against DDX52
ENCFF419WYK	hg19	/experiments/ENCSR454OFD/	1	eCLIP control experiment on HepG2 against DDX55
ENCFF825UNM	hg19	/experiments/ENCSR845VGB/	1	eCLIP experiment on HepG2 against DDX55
ENCFF744ELJ	hg19	/experiments/ENCSR845VGB/	2	eCLIP experiment on HepG2 against DDX55
ENCFF995MPE	hg19	/experiments/ENCSR334OMC/	1	eCLIP control experiment on HepG2 against DDX59
ENCFF480MRD	hg19	/experiments/ENCSR214BZA/	1	eCLIP experiment on HepG2 against DDX59
ENCFF112UBR	hg19	/experiments/ENCSR214BZA/	2	eCLIP experiment on HepG2 against DDX59
ENCFF686MTX	hg19	/experiments/ENCSR099KAK/	1	eCLIP control experiment on HepG2 against DDX6
ENCFF293PUM	hg19	/experiments/ENCSR141OIM/	1	eCLIP experiment on HepG2 against DDX6
ENCFF978UYI	hg19	/experiments/ENCSR141OIM/	2	eCLIP experiment on HepG2 against DDX6
ENCFF209NTM	hg19	/experiments/ENCSR298SAD/	1	eCLIP control experiment on HepG2 against DGCR8
ENCFF703NQI	hg19	/experiments/ENCSR061SZV/	1	eCLIP experiment on HepG2 against DGCR8
ENCFF559WUX	hg19	/experiments/ENCSR061SZV/	2	eCLIP experiment on HepG2 against DGCR8
ENCFF552GHW	hg19	/experiments/ENCSR151MPZ/	1	eCLIP control experiment on HepG2 against DHX30
ENCFF678OCJ	hg19	/experiments/ENCSR565DGW/	1	eCLIP experiment on HepG2 against DHX30
ENCFF259ZLG	hg19	/experiments/ENCSR565DGW/	2	eCLIP experiment on HepG2 against DHX30
ENCFF973XJS	hg19	/experiments/ENCSR197LHH/	1	eCLIP control experiment on HepG2 against DKC1
ENCFF568RRM	hg19	/experiments/ENCSR301TFY/	1	eCLIP experiment on HepG2 against DKC1
ENCFF111YEH	hg19	/experiments/ENCSR301TFY/	2	eCLIP experiment on HepG2 against DKC1
ENCFF960QIE	hg19	/experiments/ENCSR785VKF/	1	eCLIP control experiment on HepG2 against DROSHA
ENCFF773TOS	hg19	/experiments/ENCSR834YLD/	1	eCLIP experiment on HepG2 against DROSHA
ENCFF190HNU	hg19	/experiments/ENCSR834YLD/	2	eCLIP experiment on HepG2 against DROSHA
ENCFF056AWB	hg19	/experiments/ENCSR878HWU/	1	eCLIP control experiment on HepG2 against EFTUD2
ENCFF201YNC	hg19	/experiments/ENCSR527DXF/	1	eCLIP experiment on HepG2 against EFTUD2
ENCFF381UFF	hg19	/experiments/ENCSR527DXF/	2	eCLIP experiment on HepG2 against EFTUD2
ENCFF400HLC	hg19	/experiments/ENCSR755PSW/	1	eCLIP control experiment on HepG2 against EIF3D
ENCFF005VCE	hg19	/experiments/ENCSR041NUV/	1	eCLIP experiment on HepG2 against EIF3D
ENCFF187PCO	hg19	/experiments/ENCSR041NUV/	2	eCLIP experiment on HepG2 against EIF3D
ENCFF984JIA	hg19	/experiments/ENCSR756NPZ/	1	eCLIP control experiment on HepG2 against EIF3H
ENCFF321VYR	hg19	/experiments/ENCSR916XIV/	1	eCLIP experiment on HepG2 against EIF3H
ENCFF135UVS	hg19	/experiments/ENCSR916XIV/	2	eCLIP experiment on HepG2 against EIF3H
ENCFF500BEE	hg19	/experiments/ENCSR831WYG/	1	eCLIP control experiment on HepG2 against EXOSC5
ENCFF535JNJ	hg19	/experiments/ENCSR693JWP/	1	eCLIP experiment on HepG2 against EXOSC5
ENCFF144JVB	hg19	/experiments/ENCSR693JWP/	2	eCLIP experiment on HepG2 against EXOSC5
ENCFF333KJO	hg19	/experiments/ENCSR839KAX/	1	eCLIP control experiment on HepG2 against FAM120A
ENCFF599VUS	hg19	/experiments/ENCSR987NYS/	1	eCLIP experiment on HepG2 against FAM120A
ENCFF105IAX	hg19	/experiments/ENCSR987NYS/	2	eCLIP experiment on HepG2 against FAM120A
ENCFF217NZS	hg19	/experiments/ENCSR671FKF/	1	eCLIP control experiment on HepG2 against FASTKD2
ENCFF903QKL	hg19	/experiments/ENCSR023UHL/	1	eCLIP experiment on HepG2 against FASTKD2
ENCFF121OYK	hg19	/experiments/ENCSR023UHL/	2	eCLIP experiment on HepG2 against FASTKD2
ENCFF194AMH	hg19	/experiments/ENCSR704LTK/	1	eCLIP control experiment on HepG2 against FKBP4
ENCFF035UHD	hg19	/experiments/ENCSR018ZUE/	1	eCLIP experiment on HepG2 against FKBP4
ENCFF249FBZ	hg19	/experiments/ENCSR018ZUE/	2	eCLIP experiment on HepG2 against FKBP4
ENCFF310NFE	hg19	/experiments/ENCSR343MKJ/	1	eCLIP control experiment on HepG2 against FTO
ENCFF063UTV	hg19	/experiments/ENCSR903PRV/	1	eCLIP experiment on HepG2 against FTO
ENCFF723DFF	hg19	/experiments/ENCSR903PRV/	2	eCLIP experiment on HepG2 against FTO
ENCFF370QJE	hg19	/experiments/ENCSR056RZV/	1	eCLIP control experiment on HepG2 against FUBP3
ENCFF709YPU	hg19	/experiments/ENCSR486YGP/	1	eCLIP experiment on HepG2 against FUBP3
ENCFF565TFN	hg19	/experiments/ENCSR486YGP/	2	eCLIP experiment on HepG2 against FUBP3
ENCFF654ULI	hg19	/experiments/ENCSR986HXA/	1	eCLIP control experiment on HepG2 against FUS
ENCFF014VCG	hg19	/experiments/ENCSR464OSH/	1	eCLIP experiment on HepG2 against FUS
ENCFF311LXM	hg19	/experiments/ENCSR464OSH/	2	eCLIP experiment on HepG2 against FUS
ENCFF936GTY	hg19	/experiments/ENCSR592ESN/	1	eCLIP control experiment on HepG2 against FXR2
ENCFF032TZM	hg19	/experiments/ENCSR973HOJ/	1	eCLIP experiment on HepG2 against FXR2
ENCFF385GCC	hg19	/experiments/ENCSR973HOJ/	2	eCLIP experiment on HepG2 against FXR2
ENCFF581DQC	hg19	/experiments/ENCSR907EBB/	1	eCLIP control experiment on HepG2 against G3BP1
ENCFF564AEK	hg19	/experiments/ENCSR721HPX/	1	eCLIP experiment on HepG2 against G3BP1
ENCFF340DMM	hg19	/experiments/ENCSR721HPX/	2	eCLIP experiment on HepG2 against G3BP1
ENCFF073MFR	hg19	/experiments/ENCSR638YHN/	1	eCLIP control experiment on HepG2 against GRSF1
ENCFF374FFC	hg19	/experiments/ENCSR668MJX/	1	eCLIP experiment on HepG2 against GRSF1
ENCFF163SXQ	hg19	/experiments/ENCSR668MJX/	2	eCLIP experiment on HepG2 against GRSF1
ENCFF403RNH	hg19	/experiments/ENCSR835ZOK/	1	eCLIP control experiment on HepG2 against GRWD1
ENCFF449TUS	hg19	/experiments/ENCSR893NWB/	1	eCLIP experiment on HepG2 against GRWD1
ENCFF459XDE	hg19	/experiments/ENCSR893NWB/	2	eCLIP experiment on HepG2 against GRWD1
ENCFF435UZZ	hg19	/experiments/ENCSR451HMR/	1	eCLIP control experiment on HepG2 against GTF2F1
ENCFF587LRZ	hg19	/experiments/ENCSR265ZIS/	1	eCLIP experiment on HepG2 against GTF2F1
ENCFF498YIO	hg19	/experiments/ENCSR265ZIS/	2	eCLIP experiment on HepG2 against GTF2F1
ENCFF395HUI	hg19	/experiments/ENCSR705DCQ/	1	eCLIP control experiment on HepG2 against HLTF
ENCFF748PZV	hg19	/experiments/ENCSR647HOX/	1	eCLIP experiment on HepG2 against HLTF
ENCFF773TEB	hg19	/experiments/ENCSR647HOX/	2	eCLIP experiment on HepG2 against HLTF
ENCFF205PBQ	hg19	/experiments/ENCSR110XNS/	1	eCLIP control experiment on HepG2 against HNRNPA1
ENCFF963VIU	hg19	/experiments/ENCSR769UEW/	1	eCLIP experiment on HepG2 against HNRNPA1
ENCFF804BLC	hg19	/experiments/ENCSR769UEW/	2	eCLIP experiment on HepG2 against HNRNPA1
ENCFF823ZZZ	hg19	/experiments/ENCSR497ANA/	1	eCLIP control experiment on HepG2 against HNRNPC
ENCFF736ZQQ	hg19	/experiments/ENCSR550DVK/	1	eCLIP experiment on HepG2 against HNRNPC
ENCFF869PNM	hg19	/experiments/ENCSR550DVK/	2	eCLIP experiment on HepG2 against HNRNPC
ENCFF538YHY	hg19	/experiments/ENCSR354KAS/	1	eCLIP control experiment on HepG2 against HNRNPK
ENCFF457EXY	hg19	/experiments/ENCSR828ZID/	1	eCLIP experiment on HepG2 against HNRNPK
ENCFF329QRR	hg19	/experiments/ENCSR828ZID/	2	eCLIP experiment on HepG2 against HNRNPK
ENCFF139YRQ	hg19	/experiments/ENCSR513UTE/	1	eCLIP control experiment on HepG2 against HNRNPL
ENCFF840DTR	hg19	/experiments/ENCSR724RDN/	1	eCLIP experiment on HepG2 against HNRNPL
ENCFF894SMP	hg19	/experiments/ENCSR724RDN/	2	eCLIP experiment on HepG2 against HNRNPL
ENCFF381PFB	hg19	/experiments/ENCSR459ONR/	1	eCLIP control experiment on HepG2 against HNRNPM
ENCFF160MZO	hg19	/experiments/ENCSR267UCX/	1	eCLIP experiment on HepG2 against HNRNPM
ENCFF450IJF	hg19	/experiments/ENCSR267UCX/	2	eCLIP experiment on HepG2 against HNRNPM
ENCFF424XSW	hg19	/experiments/ENCSR614VYQ/	1	eCLIP control experiment on HepG2 against HNRNPU
ENCFF979DWE	hg19	/experiments/ENCSR240MVJ/	1	eCLIP experiment on HepG2 against HNRNPU
ENCFF323IDR	hg19	/experiments/ENCSR240MVJ/	2	eCLIP experiment on HepG2 against HNRNPU
ENCFF647EHU	hg19	/experiments/ENCSR643JMB/	1	eCLIP control experiment on HepG2 against HNRNPUL1
ENCFF076JEG	hg19	/experiments/ENCSR755TJC/	1	eCLIP experiment on HepG2 against HNRNPUL1
ENCFF398LMC	hg19	/experiments/ENCSR755TJC/	2	eCLIP experiment on HepG2 against HNRNPUL1
ENCFF772RXA	hg19	/experiments/ENCSR205ZCE/	1	eCLIP control experiment on HepG2 against IGF2BP1
ENCFF059OSQ	hg19	/experiments/ENCSR744GEU/	1	eCLIP experiment on HepG2 against IGF2BP1
ENCFF438FSK	hg19	/experiments/ENCSR744GEU/	2	eCLIP experiment on HepG2 against IGF2BP1
ENCFF983FIG	hg19	/experiments/ENCSR077KVG/	1	eCLIP control experiment on HepG2 against IGF2BP3
ENCFF163VGP	hg19	/experiments/ENCSR993OLA/	1	eCLIP experiment on HepG2 against IGF2BP3
ENCFF957CDL	hg19	/experiments/ENCSR993OLA/	2	eCLIP experiment on HepG2 against IGF2BP3
ENCFF950TBS	hg19	/experiments/ENCSR080OLK/	1	eCLIP control experiment on HepG2 against ILF3
ENCFF286FBL	hg19	/experiments/ENCSR786TSC/	1	eCLIP experiment on HepG2 against ILF3
ENCFF409NUO	hg19	/experiments/ENCSR786TSC/	2	eCLIP experiment on HepG2 against ILF3
ENCFF792HHG	hg19	/experiments/ENCSR423QXH/	1	eCLIP control experiment on HepG2 against KHSRP
ENCFF464FAG	hg19	/experiments/ENCSR366DGX/	1	eCLIP experiment on HepG2 against KHSRP
ENCFF963RSK	hg19	/experiments/ENCSR366DGX/	2	eCLIP experiment on HepG2 against KHSRP
ENCFF234DAV	hg19	/experiments/ENCSR192PUP/	1	eCLIP control experiment on HepG2 against LARP4
ENCFF284OHP	hg19	/experiments/ENCSR805SRN/	1	eCLIP experiment on HepG2 against LARP4
ENCFF080EMQ	hg19	/experiments/ENCSR805SRN/	2	eCLIP experiment on HepG2 against LARP4
ENCFF015FBQ	hg19	/experiments/ENCSR095SIV/	1	eCLIP control experiment on HepG2 against LARP7
ENCFF805KJP	hg19	/experiments/ENCSR961OKA/	1	eCLIP experiment on HepG2 against LARP7
ENCFF406RMO	hg19	/experiments/ENCSR961OKA/	2	eCLIP experiment on HepG2 against LARP7
ENCFF362UUB	hg19	/experiments/ENCSR746ZSV/	1	eCLIP control experiment on HepG2 against LIN28B
ENCFF763NGW	hg19	/experiments/ENCSR861GYE/	1	eCLIP experiment on HepG2 against Lin28B
ENCFF925HAH	hg19	/experiments/ENCSR861GYE/	2	eCLIP experiment on HepG2 against Lin28B
ENCFF016TIF	hg19	/experiments/ENCSR114XBO/	1	eCLIP control experiment on HepG2 against LSM11
ENCFF229GCX	hg19	/experiments/ENCSR135VMS/	1	eCLIP experiment on HepG2 against LSM11
ENCFF443NQT	hg19	/experiments/ENCSR135VMS/	2	eCLIP experiment on HepG2 against LSM11
ENCFF790VFN	hg19	/experiments/ENCSR438XYI/	1	eCLIP control experiment on HepG2 against MATR3
ENCFF764PHF	hg19	/experiments/ENCSR290VLT/	1	eCLIP experiment on HepG2 against MATR3
ENCFF719KGK	hg19	/experiments/ENCSR290VLT/	2	eCLIP experiment on HepG2 against MATR3
ENCFF232YSX	hg19	/experiments/ENCSR257OYO/	1	eCLIP control experiment on HepG2 against NCBP2
ENCFF457IKB	hg19	/experiments/ENCSR018RVZ/	1	eCLIP experiment on HepG2 against NCBP2
ENCFF071ZJE	hg19	/experiments/ENCSR018RVZ/	2	eCLIP experiment on HepG2 against NCBP2
ENCFF325ZEZ	hg19	/experiments/ENCSR138HJN/	1	eCLIP control experiment on HepG2 against NIP7
ENCFF251ZRM	hg19	/experiments/ENCSR361OCV/	1	eCLIP experiment on HepG2 against NIP7
ENCFF048BEP	hg19	/experiments/ENCSR361OCV/	2	eCLIP experiment on HepG2 against NIP7
ENCFF085NXC	hg19	/experiments/ENCSR479XOI/	1	eCLIP control experiment on HepG2 against NKRF
ENCFF825FWR	hg19	/experiments/ENCSR277DEO/	1	eCLIP experiment on HepG2 against NKRF
ENCFF470VYY	hg19	/experiments/ENCSR277DEO/	2	eCLIP experiment on HepG2 against NKRF
ENCFF818JLM	hg19	/experiments/ENCSR709ABG/	1	eCLIP control experiment on HepG2 against NOL12
ENCFF821NNN	hg19	/experiments/ENCSR820DQJ/	1	eCLIP experiment on HepG2 against NOL12
ENCFF160ZHG	hg19	/experiments/ENCSR820DQJ/	2	eCLIP experiment on HepG2 against NOL12
ENCFF221KHG	hg19	/experiments/ENCSR278BZH/	1	eCLIP control experiment on HepG2 against NOLC1
ENCFF840HYK	hg19	/experiments/ENCSR194HZU/	1	eCLIP experiment on HepG2 against NOLC1
ENCFF102DLV	hg19	/experiments/ENCSR194HZU/	2	eCLIP experiment on HepG2 against NOLC1
ENCFF224LLH	hg19	/experiments/ENCSR310WYE/	1	eCLIP control experiment on HepG2 against PABPN1
ENCFF922VHA	hg19	/experiments/ENCSR820UYE/	1	eCLIP experiment on HepG2 against PABPN1
ENCFF441BOM	hg19	/experiments/ENCSR820UYE/	2	eCLIP experiment on HepG2 against PABPN1
ENCFF935TUD	hg19	/experiments/ENCSR825FTY/	1	eCLIP control experiment on HepG2 against PCBP1
ENCFF547HEQ	hg19	/experiments/ENCSR256CHX/	1	eCLIP experiment on HepG2 against PCBP1
ENCFF041ULU	hg19	/experiments/ENCSR256CHX/	2	eCLIP experiment on HepG2 against PCBP1
ENCFF124RDW	hg19	/experiments/ENCSR115GAA/	1	eCLIP control experiment on HepG2 against PCBP2
ENCFF812IPR	hg19	/experiments/ENCSR339FUY/	1	eCLIP experiment on HepG2 against PCBP2
ENCFF032HWP	hg19	/experiments/ENCSR339FUY/	2	eCLIP experiment on HepG2 against PCBP2
ENCFF054YWG	hg19	/experiments/ENCSR129SCO/	1	eCLIP control experiment on HepG2 against POLR2G
ENCFF783TNF	hg19	/experiments/ENCSR820WHR/	1	eCLIP experiment on HepG2 against POLR2G
ENCFF429JCN	hg19	/experiments/ENCSR820WHR/	2	eCLIP experiment on HepG2 against POLR2G
ENCFF774GNF	hg19	/experiments/ENCSR445LJH/	1	eCLIP control experiment on HepG2 against PPIG
ENCFF733DRI	hg19	/experiments/ENCSR097NEE/	1	eCLIP experiment on HepG2 against PPIG
ENCFF144GBK	hg19	/experiments/ENCSR097NEE/	2	eCLIP experiment on HepG2 against PPIG
ENCFF827HXV	hg19	/experiments/ENCSR367ACZ/	1	eCLIP control experiment on HepG2 against PRPF4
ENCFF690QDN	hg19	/experiments/ENCSR977OXG/	1	eCLIP experiment on HepG2 against PRPF4
ENCFF714PLV	hg19	/experiments/ENCSR977OXG/	2	eCLIP experiment on HepG2 against PRPF4
ENCFF849APG	hg19	/experiments/ENCSR565KBR/	1	eCLIP control experiment on HepG2 against PRPF8
ENCFF244MEN	hg19	/experiments/ENCSR121NVA/	1	eCLIP experiment on HepG2 against PRPF8
ENCFF134AZF	hg19	/experiments/ENCSR121NVA/	2	eCLIP experiment on HepG2 against PRPF8
ENCFF603FCS	hg19	/experiments/ENCSR438NCK/	1	eCLIP control experiment on HepG2 against PTBP1
ENCFF938PTT	hg19	/experiments/ENCSR384KAN/	1	eCLIP experiment on HepG2 against PTBP1
ENCFF395VNE	hg19	/experiments/ENCSR384KAN/	2	eCLIP experiment on HepG2 against PTBP1
ENCFF365AGK	hg19	/experiments/ENCSR130TOJ/	1	eCLIP control experiment on HepG2 against QKI
ENCFF179YDO	hg19	/experiments/ENCSR570WLM/	1	eCLIP experiment on HepG2 against QKI
ENCFF081ZJS	hg19	/experiments/ENCSR570WLM/	2	eCLIP experiment on HepG2 against QKI
ENCFF590UCY	hg19	/experiments/ENCSR799EKA/	1	eCLIP control experiment on HepG2 against RBFOX2
ENCFF994WPX	hg19	/experiments/ENCSR987FTF/	1	eCLIP experiment on HepG2 against RBFOX2
ENCFF154BQS	hg19	/experiments/ENCSR987FTF/	2	eCLIP experiment on HepG2 against RBFOX2
ENCFF809OPL	hg19	/experiments/ENCSR317PWQ/	1	eCLIP control experiment on HepG2 against RBM15
ENCFF415HAC	hg19	/experiments/ENCSR754NDA/	1	eCLIP experiment on HepG2 against RBM15
ENCFF499LMU	hg19	/experiments/ENCSR754NDA/	2	eCLIP experiment on HepG2 against RBM15
ENCFF091VIF	hg19	/experiments/ENCSR775UPS/	1	eCLIP control experiment on HepG2 against RBM22
ENCFF755XIB	hg19	/experiments/ENCSR456JJQ/	1	eCLIP experiment on HepG2 against RBM22
ENCFF743SKO	hg19	/experiments/ENCSR456JJQ/	2	eCLIP experiment on HepG2 against RBM22
ENCFF613LRN	hg19	/experiments/ENCSR414RME/	1	eCLIP control experiment on HepG2 against RBM5
ENCFF184RSE	hg19	/experiments/ENCSR489ABS/	1	eCLIP experiment on HepG2 against RBM5
ENCFF949ENR	hg19	/experiments/ENCSR489ABS/	2	eCLIP experiment on HepG2 against RBM5
ENCFF934ORV	hg19	/experiments/ENCSR224ECB/	1	eCLIP control experiment on HepG2 against RPL23A
ENCFF708TVU	hg19	/experiments/ENCSR745BIL/	1	eCLIP control experiment on HepG2 against RPS3
ENCFF634IHJ	hg19	/experiments/ENCSR766FAC/	1	eCLIP experiment on HepG2 against RPS3
ENCFF055PDH	hg19	/experiments/ENCSR766FAC/	2	eCLIP experiment on HepG2 against RPS3
ENCFF761PIB	hg19	/experiments/ENCSR828MEJ/	1	eCLIP control experiment on HepG2 against RPS5
ENCFF028LZG	hg19	/experiments/ENCSR307WAE/	1	eCLIP experiment on HepG2 against RPS5
ENCFF916HDB	hg19	/experiments/ENCSR307WAE/	2	eCLIP experiment on HepG2 against RPS5
ENCFF172IOQ	hg19	/experiments/ENCSR451BRX/	1	eCLIP control experiment on HepG2 against SAFB
ENCFF255QDJ	hg19	/experiments/ENCSR337XGI/	1	eCLIP experiment on HepG2 against SAFB
ENCFF669OQB	hg19	/experiments/ENCSR337XGI/	2	eCLIP experiment on HepG2 against SAFB
ENCFF575PPP	hg19	/experiments/ENCSR130ZDS/	1	eCLIP control experiment on HepG2 against SDAD1
ENCFF875HEP	hg19	/experiments/ENCSR050BDZ/	1	eCLIP experiment on HepG2 against SDAD1
ENCFF004ZSD	hg19	/experiments/ENCSR050BDZ/	2	eCLIP experiment on HepG2 against SDAD1
ENCFF514RHC	hg19	/experiments/ENCSR859PUB/	1	eCLIP control experiment on HepG2 against SF3A3
ENCFF231UPL	hg19	/experiments/ENCSR331MIC/	1	eCLIP experiment on HepG2 against SF3A3
ENCFF955MLC	hg19	/experiments/ENCSR331MIC/	2	eCLIP experiment on HepG2 against SF3A3
ENCFF976CQJ	hg19	/experiments/ENCSR886YYD/	1	eCLIP control experiment on HepG2 against SF3B4
ENCFF855AZI	hg19	/experiments/ENCSR279UJF/	1	eCLIP experiment on HepG2 against SF3B4
ENCFF352PAK	hg19	/experiments/ENCSR279UJF/	2	eCLIP experiment on HepG2 against SF3B4
ENCFF839ZIO	hg19	/experiments/ENCSR506EIW/	1	eCLIP control experiment on HepG2 against SFPQ
ENCFF862AWU	hg19	/experiments/ENCSR965DLL/	1	eCLIP experiment on HepG2 against SFPQ
ENCFF849HII	hg19	/experiments/ENCSR965DLL/	2	eCLIP experiment on HepG2 against SFPQ
ENCFF262DRT	hg19	/experiments/ENCSR670UPZ/	1	eCLIP control experiment on HepG2 against SLTM
ENCFF125BHF	hg19	/experiments/ENCSR351PVI/	1	eCLIP experiment on HepG2 against SLTM
ENCFF736YMC	hg19	/experiments/ENCSR351PVI/	2	eCLIP experiment on HepG2 against SLTM
ENCFF410TUD	hg19	/experiments/ENCSR388VKV/	1	eCLIP control experiment on HepG2 against SMNDC1
ENCFF966TSJ	hg19	/experiments/ENCSR373ODC/	1	eCLIP experiment on HepG2 against SMNDC1
ENCFF468CQU	hg19	/experiments/ENCSR373ODC/	2	eCLIP experiment on HepG2 against SMNDC1
ENCFF543YCY	hg19	/experiments/ENCSR167OYL/	1	eCLIP control experiment on HepG2 against SND1
ENCFF827JFL	hg19	/experiments/ENCSR061EVO/	1	eCLIP experiment on HepG2 against SND1
ENCFF174TXM	hg19	/experiments/ENCSR061EVO/	2	eCLIP experiment on HepG2 against SND1
ENCFF445NNG	hg19	/experiments/ENCSR499ZCU/	1	eCLIP control experiment on HepG2 against SRSF1
ENCFF953OZR	hg19	/experiments/ENCSR989VIY/	1	eCLIP experiment on HepG2 against SRSF1
ENCFF832WNY	hg19	/experiments/ENCSR989VIY/	2	eCLIP experiment on HepG2 against SRSF1
ENCFF586AZF	hg19	/experiments/ENCSR629MQN/	1	eCLIP control experiment on HepG2 against SRSF7
ENCFF106PSH	hg19	/experiments/ENCSR513NDD/	1	eCLIP experiment on HepG2 against SRSF7
ENCFF632LPF	hg19	/experiments/ENCSR513NDD/	2	eCLIP experiment on HepG2 against SRSF7
ENCFF849LMJ	hg19	/experiments/ENCSR060VZF/	1	eCLIP control experiment on HepG2 against SRSF9
ENCFF593PCX	hg19	/experiments/ENCSR773KRC/	1	eCLIP experiment on HepG2 against SRSF9
ENCFF709HAD	hg19	/experiments/ENCSR773KRC/	2	eCLIP experiment on HepG2 against SRSF9
ENCFF820ONK	hg19	/experiments/ENCSR145ZKN/	1	eCLIP control experiment on HepG2 against SSB
ENCFF746AWW	hg19	/experiments/ENCSR352STY/	1	eCLIP experiment on HepG2 against SSB
ENCFF856EEK	hg19	/experiments/ENCSR352STY/	2	eCLIP experiment on HepG2 against SSB
ENCFF737HQI	hg19	/experiments/ENCSR701QEP/	1	eCLIP control experiment on HepG2 against STAU2
ENCFF709VHF	hg19	/experiments/ENCSR979EWD/	1	eCLIP experiment on HepG2 against STAU2
ENCFF884DMT	hg19	/experiments/ENCSR979EWD/	2	eCLIP experiment on HepG2 against STAU2
ENCFF402KQE	hg19	/experiments/ENCSR641PRC/	1	eCLIP control experiment on HepG2 against SUB1
ENCFF994CFH	hg19	/experiments/ENCSR406OOZ/	1	eCLIP experiment on HepG2 against SUB1
ENCFF908VRY	hg19	/experiments/ENCSR406OOZ/	2	eCLIP experiment on HepG2 against SUB1
ENCFF021LLL	hg19	/experiments/ENCSR895TTM/	1	eCLIP control experiment on HepG2 against SUGP2
ENCFF265BFS	hg19	/experiments/ENCSR506UPY/	1	eCLIP experiment on HepG2 against SUGP2
ENCFF556QBW	hg19	/experiments/ENCSR506UPY/	2	eCLIP experiment on HepG2 against SUGP2
ENCFF737MAB	hg19	/experiments/ENCSR376KLZ/	1	eCLIP control experiment on HepG2 against SUPV3L1
ENCFF429MXX	hg19	/experiments/ENCSR580MFX/	1	eCLIP experiment on HepG2 against SUPV3L1
ENCFF816LYN	hg19	/experiments/ENCSR580MFX/	2	eCLIP experiment on HepG2 against SUPV3L1
ENCFF743PLU	hg19	/experiments/ENCSR708TCY/	1	eCLIP control experiment on HepG2 against TAF15
ENCFF981SIK	hg19	/experiments/ENCSR841EQA/	1	eCLIP experiment on HepG2 against TAF15
ENCFF730OHC	hg19	/experiments/ENCSR841EQA/	2	eCLIP experiment on HepG2 against TAF15
ENCFF082JCZ	hg19	/experiments/ENCSR081WUU/	1	eCLIP control experiment on HepG2 against TBRG4
ENCFF116ASC	hg19	/experiments/ENCSR916SRV/	1	eCLIP experiment on HepG2 against TBRG4
ENCFF925OBE	hg19	/experiments/ENCSR916SRV/	2	eCLIP experiment on HepG2 against TBRG4
ENCFF482VTM	hg19	/experiments/ENCSR333PZV/	1	eCLIP control experiment on HepG2 against TIA1
ENCFF878IQT	hg19	/experiments/ENCSR623VEQ/	1	eCLIP experiment on HepG2 against TIA1
ENCFF485LRS	hg19	/experiments/ENCSR623VEQ/	2	eCLIP experiment on HepG2 against TIA1
ENCFF593ZRE	hg19	/experiments/ENCSR599YGK/	1	eCLIP control experiment on HepG2 against TIAL1
ENCFF118ANT	hg19	/experiments/ENCSR322HHA/	1	eCLIP experiment on HepG2 against TIAL1
ENCFF620WSX	hg19	/experiments/ENCSR322HHA/	2	eCLIP experiment on HepG2 against TIAL1
ENCFF667XUT	hg19	/experiments/ENCSR188OHK/	1	eCLIP control experiment on HepG2 against TNRC6A
ENCFF413FAM	hg19	/experiments/ENCSR544CTM/	1	eCLIP control experiment on HepG2 against TRA2A
ENCFF832CEI	hg19	/experiments/ENCSR314UMJ/	1	eCLIP experiment on HepG2 against TRA2A
ENCFF693CSS	hg19	/experiments/ENCSR314UMJ/	2	eCLIP experiment on HepG2 against TRA2A
ENCFF194SFB	hg19	/experiments/ENCSR619LRH/	1	eCLIP control experiment on HepG2 against TROVE2
ENCFF876ONV	hg19	/experiments/ENCSR993FMY/	1	eCLIP experiment on HepG2 against TROVE2
ENCFF305FNR	hg19	/experiments/ENCSR993FMY/	2	eCLIP experiment on HepG2 against TROVE2
ENCFF753HXO	hg19	/experiments/ENCSR941GJG/	1	eCLIP control experiment on HepG2 against U2AF1
ENCFF318ITR	hg19	/experiments/ENCSR328LLU/	1	eCLIP experiment on HepG2 against U2AF1
ENCFF062APM	hg19	/experiments/ENCSR328LLU/	2	eCLIP experiment on HepG2 against U2AF1
ENCFF045UZN	hg19	/experiments/ENCSR049GND/	1	eCLIP control experiment on HepG2 against U2AF2
ENCFF555WXD	hg19	/experiments/ENCSR202BFN/	1	eCLIP experiment on HepG2 against U2AF2
ENCFF706QJH	hg19	/experiments/ENCSR202BFN/	2	eCLIP experiment on HepG2 against U2AF2
ENCFF352SQG	hg19	/experiments/ENCSR161TFX/	1	eCLIP control experiment on HepG2 against UCHL5
ENCFF642XMP	hg19	/experiments/ENCSR490IEE/	1	eCLIP experiment on HepG2 against UCHL5
ENCFF671VFZ	hg19	/experiments/ENCSR490IEE/	2	eCLIP experiment on HepG2 against UCHL5
ENCFF639BOG	hg19	/experiments/ENCSR042RCU/	1	eCLIP control experiment on HepG2 against UPF1
ENCFF787DWG	hg19	/experiments/ENCSR539BEV/	1	eCLIP experiment on HepG2 against UPF1
ENCFF315BLR	hg19	/experiments/ENCSR539BEV/	2	eCLIP experiment on HepG2 against UPF1
ENCFF180MCF	hg19	/experiments/ENCSR387OVO/	1	eCLIP control experiment on HepG2 against UTP18
ENCFF747AWV	hg19	/experiments/ENCSR488JKQ/	1	eCLIP experiment on HepG2 against UTP18
ENCFF220TVR	hg19	/experiments/ENCSR488JKQ/	2	eCLIP experiment on HepG2 against UTP18
ENCFF917IQK	hg19	/experiments/ENCSR722KGI/	1	eCLIP control experiment on HepG2 against WDR43
ENCFF938XEE	hg19	/experiments/ENCSR085JPB/	1	eCLIP experiment on HepG2 against WDR43
ENCFF569JWF	hg19	/experiments/ENCSR085JPB/	2	eCLIP experiment on HepG2 against WDR43
ENCFF039AMW	hg19	/experiments/ENCSR583KVR/	1	eCLIP control experiment on HepG2 against XPO5
ENCFF581UJN	hg19	/experiments/ENCSR921SXC/	1	eCLIP experiment on HepG2 against XPO5
ENCFF679AXS	hg19	/experiments/ENCSR921SXC/	2	eCLIP experiment on HepG2 against XPO5
ENCFF350VUK	hg19	/experiments/ENCSR044NGV/	1	eCLIP control experiment on HepG2 against XRCC6
ENCFF021CNP	hg19	/experiments/ENCSR571ROL/	1	eCLIP experiment on HepG2 against XRCC6
ENCFF128IDP	hg19	/experiments/ENCSR571ROL/	2	eCLIP experiment on HepG2 against XRCC6
ENCFF723GEY	hg19	/experiments/ENCSR247PDK/	1	eCLIP control experiment on HepG2 against XRN2
ENCFF260PAC	hg19	/experiments/ENCSR655NZA/	1	eCLIP experiment on HepG2 against XRN2
ENCFF307RJJ	hg19	/experiments/ENCSR655NZA/	2	eCLIP experiment on HepG2 against XRN2
ENCFF576RGE	hg19	/experiments/ENCSR700UGT/	1	eCLIP control experiment on HepG2 against YBX3
ENCFF843MHP	hg19	/experiments/ENCSR735HOK/	1	eCLIP experiment on HepG2 against YBX3
ENCFF331WIZ	hg19	/experiments/ENCSR735HOK/	2	eCLIP experiment on HepG2 against YBX3
ENCFF102OYH	hg19	/experiments/ENCSR098VKQ/	1	eCLIP control experiment on HepG2 against ZC3H11A
ENCFF784LBV	hg19	/experiments/ENCSR907GUB/	1	eCLIP experiment on HepG2 against ZC3H11A
ENCFF225LEZ	hg19	/experiments/ENCSR907GUB/	2	eCLIP experiment on HepG2 against ZC3H11A
ENCFF966FGY	hg19	/experiments/ENCSR624CUX/	1	eCLIP control experiment on HepG2 against ZNF800
ENCFF248VYV	hg19	/experiments/ENCSR685AUR/	1	eCLIP experiment on HepG2 against ZNF800
ENCFF643WBT	hg19	/experiments/ENCSR685AUR/	2	eCLIP experiment on HepG2 against ZNF800

## Sheet: K562
accession	assembly	dataset	biological_replicates	description
ENCFF713BCH	hg19	/experiments/ENCSR696PRX/	1	eCLIP control experiment on K562 against AARS
ENCFF236UYB	hg19	/experiments/ENCSR825SVO/	1	eCLIP experiment on K562 against AARS
ENCFF694QCY	hg19	/experiments/ENCSR825SVO/	2	eCLIP experiment on K562 against AARS
ENCFF093NIR	hg19	/experiments/ENCSR290JPJ/	1	eCLIP control experiment on K562 against AATF
ENCFF906MGJ	hg19	/experiments/ENCSR819XBT/	1	eCLIP experiment on K562 against AATF
ENCFF783AKB	hg19	/experiments/ENCSR819XBT/	2	eCLIP experiment on K562 against AATF
ENCFF817YCI	hg19	/experiments/ENCSR857ORY/	1	eCLIP control experiment on K562 against ABCF1
ENCFF203DRR	hg19	/experiments/ENCSR089BXO/	1	eCLIP experiment on K562 against ABCF1
ENCFF906OCW	hg19	/experiments/ENCSR089BXO/	2	eCLIP experiment on K562 against ABCF1
ENCFF764ZUP	hg19	/experiments/ENCSR910LAN/	1	eCLIP control experiment on K562 against AGGF1
ENCFF259KQL	hg19	/experiments/ENCSR725ARB/	1	eCLIP experiment on K562 against AGGF1
ENCFF606WSU	hg19	/experiments/ENCSR725ARB/	2	eCLIP experiment on K562 against AGGF1
ENCFF447WQT	hg19	/experiments/ENCSR544UON/	1	eCLIP control experiment on K562 against AKAP1
ENCFF581UEA	hg19	/experiments/ENCSR177QQY/	1	eCLIP experiment on K562 against AKAP1
ENCFF981APU	hg19	/experiments/ENCSR177QQY/	2	eCLIP experiment on K562 against AKAP1
ENCFF057WTV	hg19	/experiments/ENCSR550SGC/	1	eCLIP control experiment on K562 against AKAP8L
ENCFF977DLI	hg19	/experiments/ENCSR206RXT/	1	eCLIP experiment on K562 against AKAP8L
ENCFF127ULN	hg19	/experiments/ENCSR206RXT/	2	eCLIP experiment on K562 against AKAP8L
ENCFF420VUM	hg19	/experiments/ENCSR382QLC/	1	eCLIP control experiment on K562 against APOBEC3C
ENCFF346VFW	hg19	/experiments/ENCSR739VVT/	1	eCLIP experiment on K562 against APOBEC3C
ENCFF398XYR	hg19	/experiments/ENCSR739VVT/	2	eCLIP experiment on K562 against APOBEC3C
ENCFF122NOF	hg19	/experiments/ENCSR952RGL/	1	eCLIP control experiment on K562 against AQR
ENCFF345VSH	hg19	/experiments/ENCSR606BPV/	1	eCLIP experiment on K562 against AQR
ENCFF235BMH	hg19	/experiments/ENCSR606BPV/	2	eCLIP experiment on K562 against AQR
ENCFF219NJE	hg19	/experiments/ENCSR943ZKM/	1	eCLIP control experiment on K562 against AUH
ENCFF504XFY	hg19	/experiments/ENCSR541QHS/	1	eCLIP experiment on K562 against AUH
ENCFF014APZ	hg19	/experiments/ENCSR541QHS/	2	eCLIP experiment on K562 against AUH
ENCFF068QGD	hg19	/experiments/ENCSR736LKF/	1	eCLIP control experiment on K562 against BUD13
ENCFF104FKE	hg19	/experiments/ENCSR663WES/	1	eCLIP experiment on K562 against BUD13
ENCFF130YZF	hg19	/experiments/ENCSR663WES/	2	eCLIP experiment on K562 against BUD13
ENCFF777AFV	hg19	/experiments/ENCSR533BNK/	1	eCLIP control experiment on K562 against CPEB4
ENCFF165CFI	hg19	/experiments/ENCSR046JHH/	1	eCLIP experiment on K562 against CPEB4
ENCFF161SFX	hg19	/experiments/ENCSR046JHH/	2	eCLIP experiment on K562 against CPEB4
ENCFF747XJC	hg19	/experiments/ENCSR249WNK/	1	eCLIP control experiment on K562 against CPSF6
ENCFF185XTD	hg19	/experiments/ENCSR532VUB/	1	eCLIP experiment on K562 against CPSF6
ENCFF550ABZ	hg19	/experiments/ENCSR532VUB/	2	eCLIP experiment on K562 against CPSF6
ENCFF729BOP	hg19	/experiments/ENCSR722LZB/	1	eCLIP control experiment on K562 against CSTF2T
ENCFF106RNO	hg19	/experiments/ENCSR840DRD/	1	eCLIP experiment on K562 against CSTF2T
ENCFF926RLW	hg19	/experiments/ENCSR840DRD/	2	eCLIP experiment on K562 against CSTF2T
ENCFF787VFD	hg19	/experiments/ENCSR266XXD/	1	eCLIP control experiment on K562 against DDX21
ENCFF845KUG	hg19	/experiments/ENCSR040QLV/	1	eCLIP experiment on K562 against DDX21
ENCFF099RYM	hg19	/experiments/ENCSR040QLV/	2	eCLIP experiment on K562 against DDX21
ENCFF327VQR	hg19	/experiments/ENCSR195IWB/	1	eCLIP control experiment on K562 against DDX24
ENCFF280ZCF	hg19	/experiments/ENCSR999WKT/	1	eCLIP experiment on K562 against DDX24
ENCFF240HDP	hg19	/experiments/ENCSR999WKT/	2	eCLIP experiment on K562 against DDX24
ENCFF697EJY	hg19	/experiments/ENCSR028CRL/	1	eCLIP control experiment on K562 against DDX3X
ENCFF188BJH	hg19	/experiments/ENCSR930BZL/	1	eCLIP experiment on K562 against DDX3X
ENCFF260CNL	hg19	/experiments/ENCSR930BZL/	2	eCLIP experiment on K562 against DDX3X
ENCFF623MFK	hg19	/experiments/ENCSR200SAU/	1	eCLIP control experiment on K562 against DDX42
ENCFF920GHG	hg19	/experiments/ENCSR576SHT/	1	eCLIP experiment on K562 against DDX42
ENCFF337FDR	hg19	/experiments/ENCSR576SHT/	2	eCLIP experiment on K562 against DDX42
ENCFF509GAY	hg19	/experiments/ENCSR268SKI/	1	eCLIP control experiment on K562 against DDX51
ENCFF536UEG	hg19	/experiments/ENCSR145NLR/	1	eCLIP experiment on K562 against DDX51
ENCFF924PFV	hg19	/experiments/ENCSR145NLR/	2	eCLIP experiment on K562 against DDX51
ENCFF301JHF	hg19	/experiments/ENCSR864XNB/	1	eCLIP control experiment on K562 against DDX52
ENCFF354DPT	hg19	/experiments/ENCSR154CSN/	1	eCLIP experiment on K562 against DDX52
ENCFF698DHB	hg19	/experiments/ENCSR154CSN/	2	eCLIP experiment on K562 against DDX52
ENCFF034NUD	hg19	/experiments/ENCSR180EJY/	1	eCLIP control experiment on K562 against DDX55
ENCFF826HOQ	hg19	/experiments/ENCSR923NKN/	1	eCLIP experiment on K562 against DDX55
ENCFF492LNE	hg19	/experiments/ENCSR923NKN/	2	eCLIP experiment on K562 against DDX55
ENCFF982ORK	hg19	/experiments/ENCSR207DWI/	1	eCLIP control experiment on K562 against DDX6
ENCFF457JWB	hg19	/experiments/ENCSR893EFU/	1	eCLIP experiment on K562 against DDX6
ENCFF766EMG	hg19	/experiments/ENCSR893EFU/	2	eCLIP experiment on K562 against DDX6
ENCFF291ITN	hg19	/experiments/ENCSR616BTD/	1	eCLIP control experiment on K562 against DGCR8
ENCFF491LUG	hg19	/experiments/ENCSR947JVR/	1	eCLIP experiment on K562 against DGCR8
ENCFF614EMY	hg19	/experiments/ENCSR947JVR/	2	eCLIP experiment on K562 against DGCR8
ENCFF325PKM	hg19	/experiments/ENCSR224SND/	1	eCLIP control experiment on K562 against DHX30
ENCFF301IKV	hg19	/experiments/ENCSR529GSJ/	1	eCLIP experiment on K562 against DHX30
ENCFF846CJI	hg19	/experiments/ENCSR529GSJ/	2	eCLIP experiment on K562 against DHX30
ENCFF059NAB	hg19	/experiments/ENCSR828NSY/	1	eCLIP control experiment on K562 against DROSHA
ENCFF637FTL	hg19	/experiments/ENCSR653HQC/	1	eCLIP experiment on K562 against DROSHA
ENCFF434GPP	hg19	/experiments/ENCSR653HQC/	2	eCLIP experiment on K562 against DROSHA
ENCFF786JER	hg19	/experiments/ENCSR266UVO/	1	eCLIP control experiment on K562 against EFTUD2
ENCFF652IOV	hg19	/experiments/ENCSR844RVX/	1	eCLIP experiment on K562 against EFTUD2
ENCFF737JZP	hg19	/experiments/ENCSR844RVX/	2	eCLIP experiment on K562 against EFTUD2
ENCFF750DBW	hg19	/experiments/ENCSR761AJD/	1	eCLIP control experiment on K562 against EIF3G
ENCFF613CYM	hg19	/experiments/ENCSR023PKW/	1	eCLIP experiment on K562 against EIF3G
ENCFF083KKV	hg19	/experiments/ENCSR023PKW/	2	eCLIP experiment on K562 against EIF3G
ENCFF906CTD	hg19	/experiments/ENCSR961WWI/	1	iCLIP experiment in K562 cells against EIF4G1
ENCFF081VUI	hg19	/experiments/ENCSR961WWI/	2	iCLIP experiment in K562 cells against EIF4G1
ENCFF551LIR	hg19	/experiments/ENCSR651NUF/	1	eCLIP control experiment on K562 against EIF4G2
ENCFF118NIZ	hg19	/experiments/ENCSR307YIW/	1	eCLIP experiment on K562 against EIF4G2
ENCFF873WNB	hg19	/experiments/ENCSR307YIW/	2	eCLIP experiment on K562 against EIF4G2
ENCFF485UCP	hg19	/experiments/ENCSR067UKU/	1	eCLIP control experiment on K562 against EWSR1
ENCFF455LTY	hg19	/experiments/ENCSR887LPK/	1	eCLIP experiment on K562 against EWSR1
ENCFF922VUQ	hg19	/experiments/ENCSR887LPK/	2	eCLIP experiment on K562 against EWSR1
ENCFF044BSI	hg19	/experiments/ENCSR308RMD/	1	eCLIP control experiment on K562 against EXOSC5
ENCFF710TEK	hg19	/experiments/ENCSR013CTQ/	1	eCLIP experiment on K562 against EXOSC5
ENCFF070QII	hg19	/experiments/ENCSR013CTQ/	2	eCLIP experiment on K562 against EXOSC5
ENCFF847OPT	hg19	/experiments/ENCSR811FFO/	1	eCLIP control experiment on K562 against FAM120A
ENCFF225RJI	hg19	/experiments/ENCSR006OEQ/	1	eCLIP experiment on K562 against FAM120A
ENCFF668AFD	hg19	/experiments/ENCSR006OEQ/	2	eCLIP experiment on K562 against FAM120A
ENCFF928RKY	hg19	/experiments/ENCSR119AFY/	1	eCLIP control experiment on K562 against FASTKD2
ENCFF223JNG	hg19	/experiments/ENCSR887FHF/	1	eCLIP experiment on K562 against FASTKD2
ENCFF158VSM	hg19	/experiments/ENCSR887FHF/	2	eCLIP experiment on K562 against FASTKD2
ENCFF328KAL	hg19	/experiments/ENCSR735MBZ/	1	eCLIP control experiment on K562 against FMR1
ENCFF436TNC	hg19	/experiments/ENCSR331VNX/	1	eCLIP experiment on K562 against FMR1
ENCFF736XNI	hg19	/experiments/ENCSR331VNX/	2	eCLIP experiment on K562 against FMR1
ENCFF755GLY	hg19	/experiments/ENCSR575DKE/	1	eCLIP control experiment on K562 against FTO
ENCFF589ZWA	hg19	/experiments/ENCSR989SMC/	1	eCLIP experiment on K562 against FTO
ENCFF552FOU	hg19	/experiments/ENCSR989SMC/	2	eCLIP experiment on K562 against FTO
ENCFF481NLU	hg19	/experiments/ENCSR389ISM/	1	eCLIP control experiment on K562 against FUS
ENCFF297CPZ	hg19	/experiments/ENCSR069EVH/	1	eCLIP experiment on K562 against FUS
ENCFF942ONE	hg19	/experiments/ENCSR477TRN/	1	CLIP experiment in K562 cells against FUS
ENCFF378ELL	hg19	/experiments/ENCSR477TRN/	2	CLIP experiment in K562 cells against FUS
ENCFF763LLF	hg19	/experiments/ENCSR069EVH/	2	eCLIP experiment on K562 against FUS
ENCFF589FSV	hg19	/experiments/ENCSR562BJW/	1	eCLIP control experiment on K562 against FXR1
ENCFF070XXP	hg19	/experiments/ENCSR774RFN/	1	eCLIP experiment on K562 against FXR1
ENCFF716VUM	hg19	/experiments/ENCSR774RFN/	2	eCLIP experiment on K562 against FXR1
ENCFF161OXR	hg19	/experiments/ENCSR411IMJ/	1	eCLIP control experiment on K562 against FXR2
ENCFF880NPI	hg19	/experiments/ENCSR224QWC/	1	eCLIP experiment on K562 against FXR2
ENCFF950NHZ	hg19	/experiments/ENCSR224QWC/	2	eCLIP experiment on K562 against FXR2
ENCFF605CQT	hg19	/experiments/ENCSR347MVO/	1	eCLIP control experiment on K562 against GEMIN5
ENCFF620MFE	hg19	/experiments/ENCSR238CLX/	1	eCLIP experiment on K562 against GEMIN5
ENCFF410UTY	hg19	/experiments/ENCSR238CLX/	2	eCLIP experiment on K562 against GEMIN5
ENCFF419JON	hg19	/experiments/ENCSR977GTT/	1	eCLIP control experiment on K562 against GNL3
ENCFF282DMO	hg19	/experiments/ENCSR301UQM/	1	eCLIP experiment on K562 against GNL3
ENCFF379DSY	hg19	/experiments/ENCSR301UQM/	2	eCLIP experiment on K562 against GNL3
ENCFF914HZF	hg19	/experiments/ENCSR393STP/	1	eCLIP control experiment on K562 against GPKOW
ENCFF400PVK	hg19	/experiments/ENCSR647CLF/	1	eCLIP experiment on K562 against GPKOW
ENCFF636IYL	hg19	/experiments/ENCSR647CLF/	2	eCLIP experiment on K562 against GPKOW
ENCFF811ULI	hg19	/experiments/ENCSR251FMT/	1	eCLIP control experiment on K562 against GRWD1
ENCFF885NJW	hg19	/experiments/ENCSR999YGP/	1	eCLIP experiment on K562 against GRWD1
ENCFF491DNL	hg19	/experiments/ENCSR999YGP/	2	eCLIP experiment on K562 against GRWD1
ENCFF135DTM	hg19	/experiments/ENCSR157BRV/	1	eCLIP control experiment on K562 against GTF2F1
ENCFF215OMD	hg19	/experiments/ENCSR736AAG/	1	eCLIP experiment on K562 against GTF2F1
ENCFF189QBX	hg19	/experiments/ENCSR736AAG/	2	eCLIP experiment on K562 against GTF2F1
ENCFF615TJD	hg19	/experiments/ENCSR502NKG/	1	eCLIP control experiment on K562 against HLTF
ENCFF043RMT	hg19	/experiments/ENCSR589YHM/	1	eCLIP experiment on K562 against HLTF
ENCFF370ROE	hg19	/experiments/ENCSR589YHM/	2	eCLIP experiment on K562 against HLTF
ENCFF335HAD	hg19	/experiments/ENCSR898ZCL/	1	eCLIP control experiment on K562 against HNRNPA1
ENCFF012EDL	hg19	/experiments/ENCSR154HRN/	1	eCLIP experiment on K562 against HNRNPA1
ENCFF292CIT	hg19	/experiments/ENCSR154HRN/	2	eCLIP experiment on K562 against HNRNPA1
ENCFF338MIV	hg19	/experiments/ENCSR960OKV/	1	eCLIP control experiment on K562 against HNRNPC
ENCFF669YBJ	hg19	/experiments/ENCSR249ROI/	1	eCLIP experiment on K562 against HNRNPC
ENCFF381SDJ	hg19	/experiments/ENCSR249ROI/	2	eCLIP experiment on K562 against HNRNPC
ENCFF742LSN	hg19	/experiments/ENCSR669DKA/	1	eCLIP control experiment on K562 against HNRNPK
ENCFF525XIM	hg19	/experiments/ENCSR268ETU/	1	eCLIP experiment on K562 against HNRNPK
ENCFF049KXT	hg19	/experiments/ENCSR268ETU/	2	eCLIP experiment on K562 against HNRNPK
ENCFF639SDC	hg19	/experiments/ENCSR299AAB/	1	eCLIP control experiment on K562 against HNRNPL
ENCFF330GSE	hg19	/experiments/ENCSR795CAI/	1	eCLIP experiment on K562 against HNRNPL
ENCFF431VLG	hg19	/experiments/ENCSR795CAI/	2	eCLIP experiment on K562 against HNRNPL
ENCFF030ZRP	hg19	/experiments/ENCSR212ILN/	1	eCLIP control experiment on K562 against HNRNPM
ENCFF854QQW	hg19	/experiments/ENCSR412NOW/	1	eCLIP experiment on K562 against HNRNPM
ENCFF259AUE	hg19	/experiments/ENCSR412NOW/	2	eCLIP experiment on K562 against HNRNPM
ENCFF710NVK	hg19	/experiments/ENCSR829SLO/	1	eCLIP control experiment on K562 against HNRNPU
ENCFF881JZG	hg19	/experiments/ENCSR520BZQ/	1	eCLIP experiment on K562 against HNRNPU
ENCFF439LWC	hg19	/experiments/ENCSR520BZQ/	2	eCLIP experiment on K562 against HNRNPU
ENCFF868UQK	hg19	/experiments/ENCSR482AWB/	1	eCLIP control experiment on K562 against HNRNPUL1
ENCFF270LHK	hg19	/experiments/ENCSR571VHI/	1	eCLIP experiment on K562 against HNRNPUL1
ENCFF472FBT	hg19	/experiments/ENCSR571VHI/	2	eCLIP experiment on K562 against HNRNPUL1
ENCFF425DPU	hg19	/experiments/ENCSR125CLF/	1	eCLIP control experiment on K562 against IGF2BP1
ENCFF002DNY	hg19	/experiments/ENCSR427DED/	1	eCLIP experiment on K562 against IGF2BP1
ENCFF002KWR	hg19	/experiments/ENCSR975KIR/	1	eCLIP experiment on K562 against IGF2BP1
ENCFF002DNX	hg19	/experiments/ENCSR427DED/	2	eCLIP experiment on K562 against IGF2BP1
ENCFF956NTH	hg19	/experiments/ENCSR975KIR/	2	eCLIP experiment on K562 against IGF2BP1
ENCFF011HZT	hg19	/experiments/ENCSR387RGT/	1	eCLIP control experiment on K562 against IGF2BP2
ENCFF002DNZ	hg19	/experiments/ENCSR193PVE/	1	eCLIP experiment on K562 against IGF2BP2
ENCFF719CCI	hg19	/experiments/ENCSR062NNB/	1	eCLIP experiment on K562 against IGF2BP2
ENCFF002DOA	hg19	/experiments/ENCSR193PVE/	2	eCLIP experiment on K562 against IGF2BP2
ENCFF446VVE	hg19	/experiments/ENCSR062NNB/	2	eCLIP experiment on K562 against IGF2BP2
ENCFF002DOB	hg19	/experiments/ENCSR096IJV/	1	eCLIP experiment on K562 against IGF2BP2
ENCFF002DOC	hg19	/experiments/ENCSR096IJV/	2	eCLIP experiment on K562 against IGF2BP2
ENCFF715OWV	hg19	/experiments/ENCSR760SFB/	1	eCLIP control experiment on K562 against ILF3
ENCFF958RKH	hg19	/experiments/ENCSR438KWZ/	1	eCLIP experiment on K562 against ILF3
ENCFF415JAG	hg19	/experiments/ENCSR438KWZ/	2	eCLIP experiment on K562 against ILF3
ENCFF721FKR	hg19	/experiments/ENCSR197NFH/	1	eCLIP control experiment on K562 against KHDRBS1
ENCFF608WLW	hg19	/experiments/ENCSR628IDK/	1	eCLIP experiment on K562 against KHDRBS1
ENCFF352QTY	hg19	/experiments/ENCSR628IDK/	2	eCLIP experiment on K562 against KHDRBS1
ENCFF644CKP	hg19	/experiments/ENCSR305IPT/	1	eCLIP control experiment on K562 against KHSRP
ENCFF133EJA	hg19	/experiments/ENCSR438GZQ/	1	eCLIP experiment on K562 against KHSRP
ENCFF665BIZ	hg19	/experiments/ENCSR438GZQ/	2	eCLIP experiment on K562 against KHSRP
ENCFF776GPK	hg19	/experiments/ENCSR679NKE/	1	eCLIP control experiment on K562 against LARP4
ENCFF644NKM	hg19	/experiments/ENCSR888YTT/	1	eCLIP experiment on K562 against LARP4
ENCFF528CMP	hg19	/experiments/ENCSR888YTT/	2	eCLIP experiment on K562 against LARP4
ENCFF699GNU	hg19	/experiments/ENCSR863ZGZ/	1	eCLIP control experiment on K562 against LARP7
ENCFF473ESV	hg19	/experiments/ENCSR456KXI/	1	eCLIP experiment on K562 against LARP7
ENCFF918NSS	hg19	/experiments/ENCSR456KXI/	2	eCLIP experiment on K562 against LARP7
ENCFF981KYA	hg19	/experiments/ENCSR399CBP/	1	eCLIP control experiment on K562 against LIN28B
ENCFF103UQK	hg19	/experiments/ENCSR970NKP/	1	eCLIP experiment on K562 against Lin28B
ENCFF134BOJ	hg19	/experiments/ENCSR970NKP/	2	eCLIP experiment on K562 against Lin28B
ENCFF816DYE	hg19	/experiments/ENCSR952UOL/	1	eCLIP control experiment on K562 against LSM11
ENCFF636BMJ	hg19	/experiments/ENCSR022BVV/	1	eCLIP experiment on K562 against LSM11
ENCFF608XEX	hg19	/experiments/ENCSR022BVV/	2	eCLIP experiment on K562 against LSM11
ENCFF245VHY	hg19	/experiments/ENCSR183FVK/	1	eCLIP control experiment on K562 against MATR3
ENCFF457BSQ	hg19	/experiments/ENCSR440SUX/	1	eCLIP experiment on K562 against MATR3
ENCFF010BJI	hg19	/experiments/ENCSR440SUX/	2	eCLIP experiment on K562 against MATR3
ENCFF942TNV	hg19	/experiments/ENCSR750NTM/	1	eCLIP control experiment on K562 against METAP2
ENCFF468ZMC	hg19	/experiments/ENCSR303OQD/	1	eCLIP experiment on K562 against METAP2
ENCFF662GNC	hg19	/experiments/ENCSR303OQD/	2	eCLIP experiment on K562 against METAP2
ENCFF358UNB	hg19	/experiments/ENCSR927XDB/	1	eCLIP control experiment on K562 against MTPAP
ENCFF169EUQ	hg19	/experiments/ENCSR200DKE/	1	eCLIP experiment on K562 against MTPAP
ENCFF998TQA	hg19	/experiments/ENCSR200DKE/	2	eCLIP experiment on K562 against MTPAP
ENCFF074LHS	hg19	/experiments/ENCSR921SHJ/	1	eCLIP control experiment on K562 against NCBP2
ENCFF891QNV	hg19	/experiments/ENCSR484LTQ/	1	eCLIP experiment on K562 against NCBP2
ENCFF771UZR	hg19	/experiments/ENCSR484LTQ/	2	eCLIP experiment on K562 against NCBP2
ENCFF094XBK	hg19	/experiments/ENCSR821ESG/	1	eCLIP control experiment on K562 against NFX1
ENCFF411ZIS	hg19	/experiments/ENCSR816NVJ/	1	eCLIP control experiment on K562 against NIPBL
ENCFF472YSO	hg19	/experiments/ENCSR891RIC/	1	eCLIP experiment on K562 against NIPBL
ENCFF861ARK	hg19	/experiments/ENCSR891RIC/	2	eCLIP experiment on K562 against NIPBL
ENCFF415WMT	hg19	/experiments/ENCSR009CIV/	1	eCLIP control experiment on K562 against NOLC1
ENCFF624HKO	hg19	/experiments/ENCSR001VAC/	1	eCLIP experiment on K562 against NOLC1
ENCFF362IRW	hg19	/experiments/ENCSR001VAC/	2	eCLIP experiment on K562 against NOLC1
ENCFF347ECS	hg19	/experiments/ENCSR487EUV/	1	eCLIP control experiment on K562 against NONO
ENCFF171ATE	hg19	/experiments/ENCSR861PAR/	1	eCLIP experiment on K562 against NONO
ENCFF224NTR	hg19	/experiments/ENCSR861PAR/	2	eCLIP experiment on K562 against NONO
ENCFF494JUE	hg19	/experiments/ENCSR468ZQA/	1	eCLIP control experiment on K562 against NPM1
ENCFF415BMS	hg19	/experiments/ENCSR867DSZ/	1	eCLIP experiment on K562 against NPM1
ENCFF531FNJ	hg19	/experiments/ENCSR867DSZ/	2	eCLIP experiment on K562 against NPM1
ENCFF112GWP	hg19	/experiments/ENCSR595PFU/	1	eCLIP control experiment on K562 against NSUN2
ENCFF479GVM	hg19	/experiments/ENCSR081JYH/	1	eCLIP experiment on K562 against NSUN2
ENCFF384EMH	hg19	/experiments/ENCSR081JYH/	2	eCLIP experiment on K562 against NSUN2
ENCFF120HRN	hg19	/experiments/ENCSR192TPA/	1	eCLIP control experiment on K562 against PABPC4
ENCFF047TLS	hg19	/experiments/ENCSR958FKZ/	1	eCLIP experiment on K562 against PABPC4
ENCFF953EUQ	hg19	/experiments/ENCSR958FKZ/	2	eCLIP experiment on K562 against PABPC4
ENCFF524GUO	hg19	/experiments/ENCSR322KLN/	1	eCLIP control experiment on K562 against PCBP1
ENCFF030CFW	hg19	/experiments/ENCSR922WJV/	1	eCLIP experiment on K562 against PCBP1
ENCFF175YZC	hg19	/experiments/ENCSR922WJV/	2	eCLIP experiment on K562 against PCBP1
ENCFF427GOR	hg19	/experiments/ENCSR103HDM/	1	eCLIP control experiment on K562 against PHF6
ENCFF213NMK	hg19	/experiments/ENCSR001KKZ/	1	eCLIP experiment on K562 against PHF6
ENCFF153JFX	hg19	/experiments/ENCSR001KKZ/	2	eCLIP experiment on K562 against PHF6
ENCFF868HLB	hg19	/experiments/ENCSR585TQT/	1	eCLIP control experiment on K562 against POLR2G
ENCFF296UEW	hg19	/experiments/ENCSR346IHS/	1	eCLIP control experiment on K562 against PPIL4
ENCFF194KZE	hg19	/experiments/ENCSR197INS/	1	eCLIP experiment on K562 against PPIL4
ENCFF601IBB	hg19	/experiments/ENCSR197INS/	2	eCLIP experiment on K562 against PPIL4
ENCFF365IYY	hg19	/experiments/ENCSR096SZE/	1	eCLIP control experiment on K562 against PRPF8
ENCFF689MJF	hg19	/experiments/ENCSR534YOI/	1	eCLIP experiment on K562 against PRPF8
ENCFF319LAK	hg19	/experiments/ENCSR534YOI/	2	eCLIP experiment on K562 against PRPF8
ENCFF982TFI	hg19	/experiments/ENCSR445FZX/	1	eCLIP control experiment on K562 against PTBP1
ENCFF247DQN	hg19	/experiments/ENCSR981WKN/	1	eCLIP experiment on K562 against PTBP1
ENCFF517FVN	hg19	/experiments/ENCSR981WKN/	2	eCLIP experiment on K562 against PTBP1
ENCFF344PFX	hg19	/experiments/ENCSR832DWW/	1	eCLIP control experiment on K562 against PUM1
ENCFF353WDF	hg19	/experiments/ENCSR308YNT/	1	eCLIP experiment on K562 against PUM1
ENCFF463VDB	hg19	/experiments/ENCSR308YNT/	2	eCLIP experiment on K562 against PUM1
ENCFF043ERY	hg19	/experiments/ENCSR439GXW/	1	eCLIP control experiment on K562 against PUM2
ENCFF177VQI	hg19	/experiments/ENCSR661ICQ/	1	eCLIP experiment on K562 against PUM2
ENCFF280ONP	hg19	/experiments/ENCSR661ICQ/	2	eCLIP experiment on K562 against PUM2
ENCFF283DWL	hg19	/experiments/ENCSR869TOB/	1	eCLIP control experiment on K562 against PUS1
ENCFF334MWZ	hg19	/experiments/ENCSR291XPT/	1	eCLIP experiment on K562 against PUS1
ENCFF489AEX	hg19	/experiments/ENCSR291XPT/	2	eCLIP experiment on K562 against PUS1
ENCFF849FKQ	hg19	/experiments/ENCSR615AAW/	1	eCLIP control experiment on K562 against QKI
ENCFF372LCI	hg19	/experiments/ENCSR366YOG/	1	eCLIP experiment on K562 against QKI
ENCFF494AKD	hg19	/experiments/ENCSR366YOG/	2	eCLIP experiment on K562 against QKI
ENCFF045FUV	hg19	/experiments/ENCSR051IXX/	1	eCLIP control experiment on K562 against RBFOX2
ENCFF654XPT	hg19	/experiments/ENCSR756CKJ/	1	eCLIP experiment on K562 against RBFOX2
ENCFF249RTF	hg19	/experiments/ENCSR756CKJ/	2	eCLIP experiment on K562 against RBFOX2
ENCFF413OBS	hg19	/experiments/ENCSR454EER/	1	eCLIP control experiment on K562 against RBM15
ENCFF141MFP	hg19	/experiments/ENCSR196INN/	1	eCLIP experiment on K562 against RBM15
ENCFF532QNF	hg19	/experiments/ENCSR196INN/	2	eCLIP experiment on K562 against RBM15
ENCFF556BXK	hg19	/experiments/ENCSR344EGD/	1	eCLIP control experiment on K562 against RBM22
ENCFF828HVQ	hg19	/experiments/ENCSR295OKT/	1	eCLIP experiment on K562 against RBM22
ENCFF367YKB	hg19	/experiments/ENCSR295OKT/	2	eCLIP experiment on K562 against RBM22
ENCFF987MIH	hg19	/experiments/ENCSR194AVW/	1	eCLIP control experiment on K562 against RBM27
ENCFF814PRA	hg19	/experiments/ENCSR489RJI/	1	eCLIP experiment on K562 against RBM27
ENCFF971UIV	hg19	/experiments/ENCSR489RJI/	2	eCLIP experiment on K562 against RBM27
ENCFF067EPR	hg19	/experiments/ENCSR881RJL/	1	eCLIP control experiment on K562 against RPS11
ENCFF430NNZ	hg19	/experiments/ENCSR269AJF/	1	eCLIP experiment on K562 against RPS11
ENCFF681CLC	hg19	/experiments/ENCSR269AJF/	2	eCLIP experiment on K562 against RPS11
ENCFF676IKU	hg19	/experiments/ENCSR567ZND/	1	eCLIP control experiment on K562 against RPS24
ENCFF700HKI	hg19	/experiments/ENCSR494JFR/	1	eCLIP control experiment on K562 against RPS3
ENCFF094OTN	hg19	/experiments/ENCSR120EAR/	1	eCLIP experiment on K562 against RPS3
ENCFF528YKE	hg19	/experiments/ENCSR120EAR/	2	eCLIP experiment on K562 against RPS3
ENCFF324BWK	hg19	/experiments/ENCSR486QAE/	1	eCLIP control experiment on K562 against RPS5
ENCFF667RGK	hg19	/experiments/ENCSR316SZJ/	1	eCLIP experiment on K562 against RPS5
ENCFF592WBX	hg19	/experiments/ENCSR316SZJ/	2	eCLIP experiment on K562 against RPS5
ENCFF140UJJ	hg19	/experiments/ENCSR978JXM/	1	eCLIP control experiment on K562 against SAFB2
ENCFF663LQH	hg19	/experiments/ENCSR943MHU/	1	eCLIP experiment on K562 against SAFB2
ENCFF488ZWQ	hg19	/experiments/ENCSR943MHU/	2	eCLIP experiment on K562 against SAFB2
ENCFF840WOP	hg19	/experiments/ENCSR111USM/	1	eCLIP control experiment on K562 against SAFB
ENCFF759SQV	hg19	/experiments/ENCSR484LAB/	1	eCLIP experiment on K562 against SAFB
ENCFF251LGV	hg19	/experiments/ENCSR484LAB/	2	eCLIP experiment on K562 against SAFB
ENCFF310FMZ	hg19	/experiments/ENCSR038TMA/	1	eCLIP control experiment on K562 against SBDS
ENCFF840JWJ	hg19	/experiments/ENCSR059CWF/	1	eCLIP experiment on K562 against SBDS
ENCFF974XMI	hg19	/experiments/ENCSR059CWF/	2	eCLIP experiment on K562 against SBDS
ENCFF982LYY	hg19	/experiments/ENCSR155XOS/	1	eCLIP control experiment on K562 against SDAD1
ENCFF998XEU	hg19	/experiments/ENCSR906ZJF/	1	eCLIP experiment on K562 against SDAD1
ENCFF262TRZ	hg19	/experiments/ENCSR906ZJF/	2	eCLIP experiment on K562 against SDAD1
ENCFF257CGL	hg19	/experiments/ENCSR752YLF/	1	eCLIP control experiment on K562 against SERBP1
ENCFF918RID	hg19	/experiments/ENCSR121GQH/	1	eCLIP experiment on K562 against SERBP1
ENCFF287EUA	hg19	/experiments/ENCSR121GQH/	2	eCLIP experiment on K562 against SERBP1
ENCFF865PNX	hg19	/experiments/ENCSR496UBM/	1	eCLIP control experiment on K562 against SF3B1
ENCFF177PRH	hg19	/experiments/ENCSR133QEA/	1	eCLIP experiment on K562 against SF3B1
ENCFF766KGY	hg19	/experiments/ENCSR133QEA/	2	eCLIP experiment on K562 against SF3B1
ENCFF503WPM	hg19	/experiments/ENCSR305KNE/	1	eCLIP control experiment on K562 against SF3B4
ENCFF379LAL	hg19	/experiments/ENCSR267OLV/	1	eCLIP experiment on K562 against SF3B4
ENCFF477PBU	hg19	/experiments/ENCSR267OLV/	2	eCLIP experiment on K562 against SF3B4
ENCFF913HKF	hg19	/experiments/ENCSR950WBG/	1	eCLIP control experiment on K562 against SLBP
ENCFF036FAN	hg19	/experiments/ENCSR483NOP/	1	eCLIP experiment on K562 against SLBP
ENCFF013SZJ	hg19	/experiments/ENCSR483NOP/	2	eCLIP experiment on K562 against SLBP
ENCFF869ACG	hg19	/experiments/ENCSR820GBM/	1	eCLIP control experiment on K562 against SLTM
ENCFF827FAW	hg19	/experiments/ENCSR000SSH/	1	eCLIP experiment on K562 against SLTM
ENCFF405BRH	hg19	/experiments/ENCSR000SSH/	2	eCLIP experiment on K562 against SLTM
ENCFF918AAS	hg19	/experiments/ENCSR631CJA/	1	eCLIP control experiment on K562 against SMNDC1
ENCFF817JQS	hg19	/experiments/ENCSR658IQB/	1	eCLIP experiment on K562 against SMNDC1
ENCFF851QPV	hg19	/experiments/ENCSR658IQB/	2	eCLIP experiment on K562 against SMNDC1
ENCFF502YXG	hg19	/experiments/ENCSR435EVK/	1	eCLIP control experiment on K562 against SND1
ENCFF367EEH	hg19	/experiments/ENCSR128VXC/	1	eCLIP experiment on K562 against SND1
ENCFF612RZN	hg19	/experiments/ENCSR128VXC/	2	eCLIP experiment on K562 against SND1
ENCFF913MGS	hg19	/experiments/ENCSR925TYQ/	1	eCLIP control experiment on K562 against SRSF1
ENCFF374XWQ	hg19	/experiments/ENCSR432XUP/	1	eCLIP experiment on K562 against SRSF1
ENCFF833PXB	hg19	/experiments/ENCSR432XUP/	2	eCLIP experiment on K562 against SRSF1
ENCFF182OOU	hg19	/experiments/ENCSR145PHJ/	1	eCLIP control experiment on K562 against SRSF7
ENCFF542LDV	hg19	/experiments/ENCSR468FSW/	1	eCLIP experiment on K562 against SRSF7
ENCFF302CUU	hg19	/experiments/ENCSR468FSW/	2	eCLIP experiment on K562 against SRSF7
ENCFF662VUV	hg19	/experiments/ENCSR680HYD/	1	eCLIP control experiment on K562 against SSB
ENCFF022SQB	hg19	/experiments/ENCSR356MSW/	1	eCLIP experiment on K562 against SSB
ENCFF659FQL	hg19	/experiments/ENCSR356MSW/	2	eCLIP experiment on K562 against SSB
ENCFF445GIJ	hg19	/experiments/ENCSR328KKB/	1	eCLIP control experiment on K562 against SUPV3L1
ENCFF620GJH	hg19	/experiments/ENCSR580OFI/	1	eCLIP experiment on K562 against SUPV3L1
ENCFF852ZSI	hg19	/experiments/ENCSR580OFI/	2	eCLIP experiment on K562 against SUPV3L1
ENCFF252UPV	hg19	/experiments/ENCSR653CNZ/	1	eCLIP control experiment on K562 against TAF15
ENCFF959XVH	hg19	/experiments/ENCSR568DZW/	1	eCLIP experiment on K562 against TAF15
ENCFF797IKQ	hg19	/experiments/ENCSR568DZW/	2	eCLIP experiment on K562 against TAF15
ENCFF887NON	hg19	/experiments/ENCSR924OLO/	1	eCLIP control experiment on K562 against TARDBP
ENCFF453YOD	hg19	/experiments/ENCSR584TCR/	1	eCLIP experiment on K562 against TDP43
ENCFF565CEU	hg19	/experiments/ENCSR584TCR/	2	eCLIP experiment on K562 against TDP43
ENCFF365ZFZ	hg19	/experiments/ENCSR512EZA/	1	eCLIP control experiment on K562 against TBRG4
ENCFF910QNU	hg19	/experiments/ENCSR506OTC/	1	eCLIP experiment on K562 against TBRG4
ENCFF307XYP	hg19	/experiments/ENCSR506OTC/	2	eCLIP experiment on K562 against TBRG4
ENCFF644ZWS	hg19	/experiments/ENCSR356GCJ/	1	eCLIP control experiment on K562 against TIA1
ENCFF314LSF	hg19	/experiments/ENCSR057DWB/	1	eCLIP experiment on K562 against TIA1
ENCFF900OHV	hg19	/experiments/ENCSR057DWB/	2	eCLIP experiment on K562 against TIA1
ENCFF002DNV	hg19	/experiments/ENCSR441YTO/	1	eCLIP experiment on K562 against TIAL1
ENCFF002DNW	hg19	/experiments/ENCSR441YTO/	2	eCLIP experiment on K562 against TIAL1
ENCFF454RJH	hg19	/experiments/ENCSR800LOQ/	1	eCLIP control experiment on K562 against TNRC6A
ENCFF664OEF	hg19	/experiments/ENCSR218NAB/	1	eCLIP experiment on K562 against TNRC6A
ENCFF432YJK	hg19	/experiments/ENCSR218NAB/	2	eCLIP experiment on K562 against TNRC6A
ENCFF175TON	hg19	/experiments/ENCSR619RLC/	1	eCLIP control experiment on K562 against TRA2A
ENCFF222FBC	hg19	/experiments/ENCSR365NVO/	1	eCLIP experiment on K562 against TRA2A
ENCFF059QDI	hg19	/experiments/ENCSR365NVO/	2	eCLIP experiment on K562 against TRA2A
ENCFF536YVM	hg19	/experiments/ENCSR687GJH/	1	eCLIP control experiment on K562 against TROVE2
ENCFF581RBS	hg19	/experiments/ENCSR539ZTS/	1	eCLIP experiment on K562 against TROVE2
ENCFF568HWB	hg19	/experiments/ENCSR539ZTS/	2	eCLIP experiment on K562 against TROVE2
ENCFF097FJQ	hg19	/experiments/ENCSR482ZSE/	1	eCLIP control experiment on K562 against U2AF1
ENCFF425GCF	hg19	/experiments/ENCSR862QCH/	1	eCLIP experiment on K562 against U2AF1
ENCFF367JCV	hg19	/experiments/ENCSR862QCH/	2	eCLIP experiment on K562 against U2AF1
ENCFF097VMD	hg19	/experiments/ENCSR871RTL/	1	eCLIP control experiment on K562 against U2AF2
ENCFF092WRE	hg19	/experiments/ENCSR893RAV/	1	eCLIP experiment on K562 against U2AF2
ENCFF783DTX	hg19	/experiments/ENCSR893RAV/	2	eCLIP experiment on K562 against U2AF2
ENCFF886HUH	hg19	/experiments/ENCSR751CSY/	1	eCLIP control experiment on K562 against UCHL5
ENCFF922LSS	hg19	/experiments/ENCSR349KMG/	1	eCLIP experiment on K562 against UCHL5
ENCFF488QYF	hg19	/experiments/ENCSR349KMG/	2	eCLIP experiment on K562 against UCHL5
ENCFF806EIK	hg19	/experiments/ENCSR461LGW/	1	eCLIP control experiment on K562 against UPF1
ENCFF119DJS	hg19	/experiments/ENCSR456ASB/	1	eCLIP experiment on K562 against UPF1
ENCFF174FBV	hg19	/experiments/ENCSR456ASB/	2	eCLIP experiment on K562 against UPF1
ENCFF342GWG	hg19	/experiments/ENCSR255PGS/	1	eCLIP control experiment on K562 against UTP18
ENCFF724EMZ	hg19	/experiments/ENCSR964VOX/	1	eCLIP experiment on K562 against UTP18
ENCFF946YXD	hg19	/experiments/ENCSR964VOX/	2	eCLIP experiment on K562 against UTP18
ENCFF204HIN	hg19	/experiments/ENCSR241ALC/	1	eCLIP control experiment on K562 against UTP3
ENCFF182NRE	hg19	/experiments/ENCSR734ZHL/	1	eCLIP experiment on K562 against UTP3
ENCFF317ALA	hg19	/experiments/ENCSR734ZHL/	2	eCLIP experiment on K562 against UTP3
ENCFF789QMT	hg19	/experiments/ENCSR033FWT/	1	eCLIP control experiment on K562 against WDR3
ENCFF731PVT	hg19	/experiments/ENCSR202HKN/	1	eCLIP experiment on K562 against WDR3
ENCFF444UFA	hg19	/experiments/ENCSR202HKN/	2	eCLIP experiment on K562 against WDR3
ENCFF701CEW	hg19	/experiments/ENCSR404ABA/	1	eCLIP control experiment on K562 against WDR43
ENCFF380CNM	hg19	/experiments/ENCSR349CMI/	1	eCLIP experiment on K562 against WDR43
ENCFF748FDO	hg19	/experiments/ENCSR349CMI/	2	eCLIP experiment on K562 against WDR43
ENCFF922LFX	hg19	/experiments/ENCSR925ZRV/	1	eCLIP control experiment on K562 against WRN
ENCFF264AQP	hg19	/experiments/ENCSR038JME/	1	eCLIP experiment on K562 against WRN
ENCFF480XQJ	hg19	/experiments/ENCSR038JME/	2	eCLIP experiment on K562 against WRN
ENCFF424DIC	hg19	/experiments/ENCSR687HHB/	1	eCLIP control experiment on K562 against XRCC6
ENCFF727MET	hg19	/experiments/ENCSR258QKO/	1	eCLIP experiment on K562 against XRCC6
ENCFF636DUC	hg19	/experiments/ENCSR258QKO/	2	eCLIP experiment on K562 against XRCC6
ENCFF651CUS	hg19	/experiments/ENCSR170XQH/	1	eCLIP control experiment on K562 against XRN2
ENCFF752ZYN	hg19	/experiments/ENCSR657TZB/	1	eCLIP experiment on K562 against XRN2
ENCFF630LQE	hg19	/experiments/ENCSR657TZB/	2	eCLIP experiment on K562 against XRN2
ENCFF405CXK	hg19	/experiments/ENCSR660VTT/	1	eCLIP control experiment on K562 against YBX3
ENCFF916BBS	hg19	/experiments/ENCSR529FKI/	1	eCLIP experiment on K562 against CSDA
ENCFF176ZDX	hg19	/experiments/ENCSR529FKI/	2	eCLIP experiment on K562 against CSDA
ENCFF481AIY	hg19	/experiments/ENCSR812PBU/	1	eCLIP control experiment on K562 against YWHAG
ENCFF463WLQ	hg19	/experiments/ENCSR867ZVK/	1	eCLIP experiment on K562 against YWHAG
ENCFF352NIP	hg19	/experiments/ENCSR867ZVK/	2	eCLIP experiment on K562 against YWHAG
ENCFF713XZZ	hg19	/experiments/ENCSR321GBR/	1	eCLIP control experiment on K562 against ZC3H11A
ENCFF116JFD	hg19	/experiments/ENCSR712IAG/	1	eCLIP experiment on K562 against ZC3H11A
ENCFF462QFK	hg19	/experiments/ENCSR712IAG/	2	eCLIP experiment on K562 against ZC3H11A
ENCFF279QTB	hg19	/experiments/ENCSR716DGM/	1	eCLIP control experiment on K562 against ZC3H8
ENCFF717DIZ	hg19	/experiments/ENCSR181NRW/	1	eCLIP experiment on K562 against ZC3H8
ENCFF302NJT	hg19	/experiments/ENCSR181NRW/	2	eCLIP experiment on K562 against ZC3H8
ENCFF790DUN	hg19	/experiments/ENCSR594RFP/	1	eCLIP control experiment on K562 against ZNF622
ENCFF388PIX	hg19	/experiments/ENCSR657TZZ/	1	eCLIP experiment on K562 against ZNF622
ENCFF216ACB	hg19	/experiments/ENCSR657TZZ/	2	eCLIP experiment on K562 against ZNF622
ENCFF762HKJ	hg19	/experiments/ENCSR615ZYL/	1	eCLIP control experiment on K562 against ZNF800
ENCFF270YPL	hg19	/experiments/ENCSR586DGV/	1	eCLIP experiment on K562 against ZNF800
ENCFF303MEM	hg19	/experiments/ENCSR586DGV/	2	eCLIP experiment on K562 against ZNF800
ENCFF562FIX	hg19	/experiments/ENCSR528HOM/	1	eCLIP control experiment on K562 against ZRANB2
ENCFF157TJP	hg19	/experiments/ENCSR663NRA/	1	eCLIP experiment on K562 against ZRANB2
ENCFF350ANF	hg19	/experiments/ENCSR663NRA/	2	eCLIP experiment on K562 against ZRANB2
