# Supplementary material for: The RNA-binding protein SFPQ preserves long-intron splicing and regulates circRNA biogenesis in mammals
Source: eLife. 2021 Jan 21;10:e63088. doi: 10.7554/eLife.63088 (PMC7819710; doi:10.7554/eLife.63088)
Supplement: Supplementary file 3. — Mapping statistics and annotated output from featureCounts, ciri2 and find_circ using RNAseq on HEK293T cells. [file elife-63088-supp3.xlsx]

## Sheet: stats
samples	reads	mapped	chimera	multimappers	multimappers_toomany	unmapped_tooshort	unmapped_other
hg19/STAR/CTRL_siRNA1_Rep1	32979041	29999814	457581	920091	32706	2013165	13265
hg19/STAR/CTRL_siRNA1_Rep2	36649771	33847029	401024	1074031	37724	1675985	15002
hg19/STAR/CTRL_siRNA2_Rep1	44192862	40917673	503207	1286549	45920	1923631	19089
hg19/STAR/CTRL_siRNA2_Rep2	35577609	32843458	432326	1077053	36240	1604980	15878
hg19/STAR/NONO_siRNA1_Rep1	28620309	26198069	349515	827094	29430	1555009	10707
hg19/STAR/NONO_siRNA1_Rep2	26199778	24010201	260750	748039	29095	1402342	10101
hg19/STAR/NONO_siRNA2_Rep1	23297615	21570831	173552	639473	22106	1056477	8728
hg19/STAR/NONO_siRNA2_Rep2	21524738	19785168	230305	631929	21588	1078349	7704
hg19/STAR/SFPQ_siRNA1_Rep1	34721402	32029049	425164	1000545	36240	1641406	14162
hg19/STAR/SFPQ_siRNA1_Rep2	33941748	31691821	266648	998290	33246	1205782	12609
hg19/STAR/SFPQ_siRNA2_Rep1	34107974	31141184	412513	986759	29267	1937522	13242
hg19/STAR/SFPQ_siRNA2_Rep2	33253808	30637980	375855	1006979	32636	1562770	13443

## Sheet: featureCounts
# Program:featureCounts v2.0.0; Command:"/home/tbhmbi/software/subread-2.0.0-Linux-x86_64/bin/featureCounts" "-p" "-a" "/home/tbhmbi/genomes/hg19/annotation/gencode/gencode.gtf" "-o" "hg19/STAR/featureCounts/fc.exon.gene_id.v28.txt.tmp" "-t" "exon" "-g" "gene_id" "-s" "2" "-O" "hg19/STAR/CTRL_siRNA1_Rep1.bam" "hg19/STAR/CTRL_siRNA1_Rep2.bam" "hg19/STAR/CTRL_siRNA2_Rep1.bam" "hg19/STAR/CTRL_siRNA2…
Geneid	Chr	Start	End	Strand	Length	hg19/STAR/CTRL_siRNA1_Rep1.bam	hg19/STAR/CTRL_siRNA1_Rep2.bam	hg19/STAR/CTRL_siRNA2_Rep1.bam	hg19/STAR/CTRL_siRNA2_Rep2.bam	hg19/STAR/NONO_siRNA1_Rep1.bam	hg19/STAR/NONO_siRNA1_Rep2.bam	hg19/STAR/NONO_siRNA2_Rep1.bam	hg19/STAR/NONO_siRNA2_Rep2.bam	hg19/STAR/SFPQ_siRNA1_Rep1.bam	hg19/STAR/SFPQ_siRNA1_Rep2.bam	hg19/STAR/SFPQ_siRNA2_Rep1.bam	hg19/STAR/SFPQ_siRNA2_Rep2.bam	name	gids	ntids	tids	exons
ENSG00000223972.5_2	chr1	11869	14409	+	1735	0	0	2	0	0	0	0	0	0	0	0	0	DDX11L1	ENSG00000223972.5_2	2	ENST00000456328.2_1,ENST00000450305.2_1	3,6
ENSG00000227232.5_2	chr1	14404	29570	-	1351	123	169	154	143	160	100	67	51	127	123	111	143	WASH7P	ENSG00000227232.5_2	1	ENST00000488147.1_1	11
ENSG00000243485.5_4	chr1	29554	31109	+	1021	0	0	0	0	0	0	0	0	0	2	0	0	RP11-34P13.3	ENSG00000243485.5_4	2	ENST00000473358.1_1,ENST00000469289.1_1	3,2
ENSG00000237613.2_2	chr1	34554	36081	-	1219	0	0	0	0	0	0	0	0	0	0	0	0	FAM138A	ENSG00000237613.2_2	2	ENST00000417324.1_1,ENST00000461467.1_1	3,2
ENSG00000268020.3_4	chr1	52473	53312	+	840	0	0	0	0	0	0	0	0	0	0	0	0	OR4G4P	ENSG00000268020.3_4	1	ENST00000606857.1_1	1
ENSG00000240361.2_3	chr1	57598	64116	+	1414	0	0	0	0	0	0	0	0	0	0	0	0	OR4G11P	ENSG00000240361.2_3	2	ENST00000642116.1_1,ENST00000492842.2_2	3,1
ENSG00000186092.6_4	chr1	65419	71585	+	2618	0	0	0	0	0	0	0	0	0	0	0	0	OR4F5	ENSG00000186092.6_4	2	ENST00000641515.2_2,ENST00000335137.4_2	3,1
ENSG00000238009.6_5	chr1	89295	133723	-	3726	13	9	11	15	4	18	1	1	21	12	0	31	RP11-34P13.7	ENSG00000238009.6_5	5	ENST00000466430.5_1,ENST00000477740.5_1,ENST00000471248.1_1,ENST00000610542.1_1,ENST00000453576.2_1	4,4,3,4,2
ENSG00000239945.1_5	chr1	89551	91105	-	1319	0	0	0	0	0	0	0	0	0	0	0	0	RP11-34P13.8	ENSG00000239945.1_5	1	ENST00000495576.1_1	2
ENSG00000233750.3_3	chr1	131025	134836	+	3812	0	0	0	0	0	0	0	0	0	0	0	0	RP11-34P13.10	ENSG00000233750.3_3	1	ENST00000442987.3_1	1
ENSG00000237683.5	chr1	134901	139379	-	2661	100	102	124	106	75	62	24	68	172	42	45	136	AL627309.1	ENSG00000237683.5	1	ENST00000423372.3	2
ENSG00000268903.1_4	chr1	135141	135895	-	755	9	2	1	6	7	9	8	12	33	10	12	10	RP11-34P13.15	ENSG00000268903.1_4	1	ENST00000494149.2_2	1
ENSG00000269981.1_4	chr1	137682	137965	-	284	12	3	13	9	9	4	0	9	12	6	10	21	RP11-34P13.16	ENSG00000269981.1_4	1	ENST00000595919.1_1	1
ENSG00000239906.1_4	chr1	139790	140339	-	323	9	6	1	0	0	0	0	1	1	0	0	6	RP11-34P13.14	ENSG00000239906.1_4	1	ENST00000493797.1_1	2
ENSG00000241860.6_4	chr1	141474	173862	-	6195	72	47	30	42	16	28	22	25	40	48	34	48	RP11-34P13.13	ENSG00000241860.6_4	4	ENST00000484859.1_1,ENST00000490997.5_1,ENST00000466557.6_1,ENST00000491962.1_1	2,3,8,3
ENSG00000222623.1	chr1	157784	157887	-	104	0	0	0	0	0	0	0	0	0	0	0	0	RNU6-1100P	ENSG00000222623.1	1	ENST00000410691.1	1
ENSG00000241599.1_4	chr1	160446	161525	+	457	0	0	0	0	0	0	0	0	0	0	0	0	RP11-34P13.9	ENSG00000241599.1_4	1	ENST00000496488.1_1	2
ENSG00000228463.4	chr1	227615	267253	-	3954	6	8	18	30	10	16	35	15	13	3	6	9	AP006222.2	ENSG00000228463.4	4	ENST00000442116.1,ENST00000448958.1,ENST00000424587.2,ENST00000335577.4	2,3,4,2
ENSG00000250575.1	chr1	326096	328112	+	1239	0	0	0	0	1	0	1	0	4	0	0	2	RP4-669L17.8	ENSG00000250575.1	1	ENST00000514436.1	2
ENSG00000233653.3	chr1	329431	332236	-	2477	0	0	0	0	0	0	0	0	0	0	0	0	CICP7	ENSG00000233653.3	1	ENST00000432723.3	2
ENSG00000224813.2	chr1	334126	334305	+	180	0	0	0	0	0	0	0	0	0	0	0	0	RP4-669L17.4	ENSG00000224813.2	1	ENST00000445840.1	1
ENSG00000235249.1	chr1	367640	368634	+	995	0	0	0	0	0	0	0	0	0	0	0	0	OR4F29	ENSG00000235249.1	1	ENST00000426406.1	1
ENSG00000269732.1	chr1	379105	379467	-	363	0	0	0	0	0	0	0	0	0	0	0	0	WBP1LP7	ENSG00000269732.1	1	ENST00000437905.2	1
ENSG00000256186.1	chr1	450820	450910	-	90	0	0	0	0	0	0	0	0	0	0	0	0	AL732372.1	ENSG00000256186.1	1	ENST00000540477.1	2
ENSG00000236601.1	chr1	453633	460480	-	635	0	0	0	0	0	0	0	0	0	0	0	0	RP4-669L17.2	ENSG00000236601.1	2	ENST00000450983.1,ENST00000412666.1	2,2
ENSG00000236743.1	chr1	459656	461954	+	676	0	0	0	0	0	2	0	3	0	0	0	1	RP5-857K21.15	ENSG00000236743.1	1	ENST00000441866.1	3
ENSG00000236679.2	chr1	470971	471355	+	385	0	0	1	0	0	0	0	0	0	0	0	0	RP4-669L17.1	ENSG00000236679.2	1	ENST00000458203.2	1
ENSG00000230021.9_4	chr1	521451	763176	-	5411	58	78	105	77	59	64	46	38	96	50	70	62	RP11-206L10.17	ENSG00000230021.9_4	14	ENST00000634833.2_2,ENST00000417636.2_2,ENST00000419394.2_2,ENST00000440196.3_2,ENST00000641296.1_1,ENST00000357876.6_2,ENST00000635509.2_2,ENST00000634337.2_2,ENST00000440200.5_1,ENST00000452176.2_2,ENST00000441245.5_2,ENST00000414688.6_2,ENST00000636676.1_1,ENST00000447954.2_2	6,3,4,5,6,2,4,5,3,4,3,3,1,2
ENSG00000235146.2_4	chr1	523009	530148	+	635	0	0	0	0	0	0	0	0	0	0	0	0	RP5-857K21.2	ENSG00000235146.2_4	2	ENST00000423796.1_1,ENST00000450696.1_1	2,2
ENSG00000225972.1_3	chr1	564442	564813	+	372	7	10	26	12	1	13	9	3	13	23	11	8	RP5-857K21.9	ENSG00000225972.1_3	1	ENST00000416931.1_1	1
ENSG00000225630.1_3	chr1	565020	566063	+	1044	162	294	348	294	191	232	172	167	164	252	223	208	RP5-857K21.8	ENSG00000225630.1_3	1	ENST00000457540.1_1	1
ENSG00000237973.1_3	chr1	566454	567996	+	1543	2637	3322	4118	3062	2425	2331	1786	2052	2402	1653	2720	2805	RP5-857K21.6	ENSG00000237973.1_3	1	ENST00000414273.1_1	1
ENSG00000229344.1_3	chr1	568137	568818	+	682	13	18	38	30	15	28	21	20	8	24	31	25	RP5-857K21.7	ENSG00000229344.1_3	1	ENST00000427426.1_1	1
ENSG00000240409.1_3	chr1	568915	569121	+	207	29	47	104	62	51	34	38	25	39	66	38	43	RP5-857K21.14	ENSG00000240409.1_3	1	ENST00000467115.1_1	1
ENSG00000248527.1_3	chr1	569076	569756	+	681	70	98	95	121	63	72	56	68	69	51	90	57	RP5-857K21.10	ENSG00000248527.1_3	1	ENST00000514057.1_1	1
ENSG00000198744.5_3	chr1	569756	570302	+	547	544	771	1060	811	442	629	510	510	354	371	632	688	RP5-857K21.11	ENSG00000198744.5_3	1	ENST00000416718.2_1	1
ENSG00000268663.1_3	chr1	610222	610645	+	424	0	0	0	0	0	0	0	0	0	0	0	0	RP5-857K21.12	ENSG00000268663.1_3	1	ENST00000438434.2_1	1
ENSG00000284662.1_1	chr1	621059	622053	-	995	0	0	0	0	0	0	0	0	0	0	0	0	OR4F16	ENSG00000284662.1_1	1	ENST00000332831.4_2	1
ENSG00000229376.3_3	chr1	657472	660283	+	2455	0	0	0	0	0	0	0	0	3	0	0	0	RP11-206L10.15	ENSG00000229376.3_3	1	ENST00000440782.3_1	2
ENSG00000228327.3_5	chr1	661265	714006	-	6432	1190	1473	1721	1442	1055	949	585	788	1452	881	1026	1583	RP11-206L10.2	ENSG00000228327.3_5	2	ENST00000506640.2_3,ENST00000428504.2_1	16,5
ENSG00000235373.1	chr1	677193	685396	-	4860	44	50	46	50	49	16	18	45	59	42	30	62	RP11-206L10.3	ENSG00000235373.1	1	ENST00000416385.1	2
ENSG00000223181.1	chr1	693613	693716	-	104	4	2	3	0	0	2	0	0	0	0	0	0	RNU6-1199P	ENSG00000223181.1	1	ENST00000411249.1	1
ENSG00000229905.1_4	chr1	696291	697369	+	456	0	0	0	0	0	0	0	0	0	0	0	0	RP11-206L10.4	ENSG00000229905.1_4	1	ENST00000422528.1_1	2
ENSG00000237491.8_4	chr1	714150	745440	+	5517	86	90	176	115	80	53	76	71	102	133	113	113	RP11-206L10.9	ENSG00000237491.8_4	20	ENST00000434264.6_1,ENST00000457084.1_1,ENST00000589899.5_1,ENST00000609830.1_2,ENST00000429505.5_1,ENST00000585826.1_1,ENST00000592547.1_1,ENST00000586928.5_1,ENST00000585745.5_1,ENST00000585768.5_1,ENST00000590848.5_1,ENST00000591440.5_1,ENST00000587530.5_1,ENST00000593022.5_1,ENST00000589531.5_1,ENST00000588951.5_1,ENST00000586288.1_1,ENST00000591702.1_1,ENST00000443772.1_1,ENST00000412115.1_1	3,2,4,4,3,1,1,2,2,2,5,3,4,4,4,4,7,1,2,3
ENSG00000285268.1_1	chr1	717317	717430	+	114	8	0	4	4	0	0	0	0	1	1	1	0	RP11-206L10.18	ENSG00000285268.1_1	1	ENST00000644482.1_1	1
ENSG00000230092.7_4	chr1	736259	753092	-	872	0	20	7	5	5	0	3	6	17	8	21	1	RP11-206L10.8	ENSG00000230092.7_4	2	ENST00000447500.4_1,ENST00000590817.3_1	5,3
ENSG00000269831.1	chr1	738532	739137	-	129	0	7	0	0	0	2	0	1	0	2	0	0	AL669831.1	ENSG00000269831.1	1	ENST00000599533.1	3
ENSG00000177757.2_2	chr1	752751	755217	+	1947	0	0	0	0	0	0	0	0	0	0	0	1	FAM87B	ENSG00000177757.2_2	1	ENST00000326734.2_1	2
ENSG00000228794.8_3	chr1	760518	794826	+	9470	119	177	208	166	95	66	72	60	164	234	157	197	RP11-206L10.11	ENSG00000228794.8_3	15	ENST00000624927.3_2,ENST00000623808.3_2,ENST00000445118.6_1,ENST00000448975.6_1,ENST00000610067.5_1,ENST00000608189.4_1,ENST00000441765.5_1,ENST00000609139.5_1,ENST00000449005.5_1,ENST00000416570.5_1,ENST00000623070.3_2,ENST00000609009.5_1,ENST00000622921.1_2,ENST00000415295.1_1,ENST00000425657.1_1	3,3,5,5,5,6,3,4,6,5,4,6,3,2,2
ENSG00000225880.5_3	chr1	761586	762902	-	1317	98	102	162	89	97	132	91	85	90	98	45	118	NCRNA00115	ENSG00000225880.5_3	1	ENST00000473798.1_1	1
ENSG00000230368.2_2	chr1	803451	812283	-	1971	0	0	0	2	0	0	0	0	0	0	0	0	FAM41C	ENSG00000230368.2_2	3	ENST00000446136.1_1,ENST00000432963.1_1,ENST00000427857.1_1	3,4,3
ENSG00000234711.1_2	chr1	808672	809729	+	1058	0	0	0	0	0	0	0	0	0	0	4	1	TUBB8P11	ENSG00000234711.1_2	1	ENST00000415481.1_1	1
ENSG00000283040.1_4	chr1	809909	812614	-	837	0	0	0	2	0	0	0	0	0	0	0	0	FAM166AP3	ENSG00000283040.1_4	1	ENST00000635557.1_1	5
ENSG00000269308.1	chr1	818043	819983	+	57	0	0	0	0	0	0	0	0	0	0	0	0	AL645608.2	ENSG00000269308.1	1	ENST00000594233.1	3
ENSG00000272438.1_5	chr1	840214	851356	+	351	37	44	53	69	39	81	44	64	145	174	74	146	RP11-54O7.16	ENSG00000272438.1_5	1	ENST00000607769.1_1	2
ENSG00000230699.2_5	chr1	846815	850328	+	3043	178	224	325	207	244	185	159	180	746	742	627	584	RP11-54O7.1	ENSG00000230699.2_5	1	ENST00000448179.1_1	2
ENSG00000241180.1_5	chr1	849551	850351	+	443	17	20	21	18	10	12	34	6	48	58	61	42	RP11-54O7.2	ENSG00000241180.1_5	1	ENST00000398216.2_1	2
ENSG00000223764.2_4	chr1	852245	856396	-	4152	76	92	79	55	117	78	48	62	148	124	205	183	RP11-54O7.3	ENSG00000223764.2_4	3	ENST00000609207.1_1,ENST00000417705.1_1,ENST00000432961.1_1	1,4,2
ENSG00000187634.11_5	chr1	859308	879961	+	4166	288	428	274	279	279	343	189	266	730	849	654	649	SAMD11	ENSG00000187634.11_5	17	ENST00000420190.6_5,ENST00000437963.5_1,ENST00000342066.7_3,ENST00000617307.4_3,ENST00000618181.4_3,ENST00000622503.4_3,ENST00000618323.4_1,ENST00000616016.4_1,ENST00000618779.4_3,ENST00000616125.4_3,ENST00000620200.4_1,ENST00000341065.8_1,ENST00000455979.1_1,ENST00000478729.1_1,ENST00000474461.1_1,ENST00000466827.1_1,ENST00000464948.1_1	7,5,14,13,11,14,12,13,13,12,9,12,7,3,4,2,2
ENSG00000268179.1	chr1	861264	866445	-	336	0	0	0	0	0	0	0	2	0	7	0	0	AL645608.1	ENSG00000268179.1	1	ENST00000598827.1	6
ENSG00000188976.10_2	chr1	879584	894689	-	5539	2071	2739	2843	2575	2429	2121	1848	2051	3248	3985	3066	3131	NOC2L	ENSG00000188976.10_2	6	ENST00000483767.5_1,ENST00000327044.6_1,ENST00000477976.5_1,ENST00000496938.1_1,ENST00000487214.1_1,ENST00000469563.1_1	5,19,17,2,7,2
ENSG00000187961.13_3	chr1	895967	901095	+	3395	1042	1378	1374	1253	1308	973	996	934	1299	1145	822	1303	KLHL17	ENSG00000187961.13_3	5	ENST00000338591.7_1,ENST00000622660.1_1,ENST00000463212.1_1,ENST00000466300.1_1,ENST00000481067.1_1	12,9,2,6,2
ENSG00000187583.10_3	chr1	901877	911245	+	2833	29	35	62	59	32	49	27	60	130	76	66	99	PLEKHN1	ENSG00000187583.10_3	5	ENST00000379410.7_1,ENST00000379409.6_3,ENST00000379407.7_1,ENST00000480267.1_1,ENST00000491024.1_1	16,15,15,3,5
ENSG00000187642.9_2	chr1	910584	917473	-	3424	2	0	0	1	0	1	0	0	1	21	0	2	PERM1	ENSG00000187642.9_2	3	ENST00000341290.6_1,ENST00000479361.1_1,ENST00000433179.3_1	5,2,3
ENSG00000272512.1_4	chr1	931346	933431	-	2086	31	60	65	47	33	31	16	7	35	44	47	36	RP11-54O7.17	ENSG00000272512.1_4	1	ENST00000606034.1_2	1
ENSG00000188290.10_3	chr1	934342	935552	-	1118	1241	1721	1283	1486	1539	1265	1102	1473	1613	2164	1292	1761	HES4	ENSG00000188290.10_3	4	ENST00000428771.6_2,ENST00000304952.10_2,ENST00000481869.1_1,ENST00000484667.2_1	3,4,2,3
ENSG00000187608.8_4	chr1	936518	949921	+	942	9	16	0	11	3	10	3	5	12	10	0	11	ISG15	ENSG00000187608.8_4	3	ENST00000624697.3_3,ENST00000624652.1_4,ENST00000379389.4_3	3,3,2
ENSG00000231702.2_4	chr1	943456	943609	-	154	0	0	0	0	0	0	0	0	0	0	0	0	RP11-54O7.10	ENSG00000231702.2_4	1	ENST00000423619.2_1	1
ENSG00000224969.1_4	chr1	947377	948573	-	471	0	0	0	0	0	1	0	0	0	0	0	5	RP11-54O7.11	ENSG00000224969.1_4	1	ENST00000458555.1_1	2
ENSG00000188157.14_4	chr1	955503	991498	+	10758	555	772	811	721	688	582	667	619	851	1036	665	746	AGRN	ENSG00000188157.14_4	10	ENST00000379370.6_1,ENST00000620552.4_1,ENST00000477585.1_3,ENST00000469403.1_1,ENST00000479707.1_1,ENST00000466223.1_1,ENST00000478677.1_1,ENST00000492947.1_1,ENST00000419249.2_3,ENST00000461111.1_1	36,39,3,3,4,3,2,2,9,3
ENSG00000242590.1_5	chr1	990413	991496	+	402	40	96	99	120	119	82	89	67	142	168	108	92	RP11-54O7.14	ENSG00000242590.1_5	1	ENST00000418300.1_1	2
ENSG00000217801.9_4	chr1	995114	1004735	+	2171	22	12	60	27	29	21	22	46	63	54	19	34	RP11-465B22.3	ENSG00000217801.9_4	6	ENST00000427998.5_1,ENST00000394517.6_1,ENST00000456409.5_1,ENST00000412397.2_1,ENST00000433695.1_1,ENST00000451054.1_1	4,3,2,10,2,2
ENSG00000273443.1_4	chr1	997588	998668	-	829	8	11	78	24	11	25	7	10	29	22	9	11	RP11-54O7.18	ENSG00000273443.1_4	1	ENST00000442292.2_1	2
ENSG00000237330.2_2	chr1	1006346	1009687	-	1902	0	0	0	0	0	0	0	0	0	0	0	0	RNF223	ENSG00000237330.2_2	1	ENST00000453464.2_1	2
ENSG00000131591.17_4	chr1	1017198	1051741	-	6322	513	797	603	686	527	546	361	438	553	731	603	705	C1orf159	ENSG00000131591.17_4	19	ENST00000379339.5_3,ENST00000465822.5_1,ENST00000379325.7_1,ENST00000421241.6_2,ENST00000487177.5_1,ENST00000477196.5_1,ENST00000467751.5_1,ENST00000464905.1_1,ENST00000379320.5_1,ENST00000379319.5_2,ENST00000434641.5_2,ENST00000482816.5_1,ENST00000462097.5_2,ENST00000473600.1_1,ENST00000475119.5_2,ENST00000442117.5_3,ENST00000427787.5_1,ENST00000472741.5_1,ENST00000480643.1_1	12,9,11,10,3,10,12,3,8,10,11,10,7,5,6,5,5,3,6
ENSG00000223823.1_3	chr1	1072397	1079436	+	1620	0	0	0	0	0	0	0	0	0	0	0	0	RP11-465B22.5	ENSG00000223823.1_3	1	ENST00000416774.1_1	3
ENSG00000207730.1	chr1	1102484	1102578	+	95	0	0	0	0	0	0	0	0	0	0	0	0	MIR200B	ENSG00000207730.1	1	ENST00000384997.1	1
ENSG00000207607.1	chr1	1103243	1103332	+	90	0	0	0	0	0	0	0	0	0	0	0	0	MIR200A	ENSG00000207607.1	1	ENST00000384875.1	1
ENSG00000198976.1	chr1	1104385	1104467	+	83	0	0	0	0	0	0	0	0	0	0	0	0	MIR429	ENSG00000198976.1	1	ENST00000362106.1	1
ENSG00000272141.1_4	chr1	1104737	1105723	+	987	0	0	0	0	0	0	0	0	0	1	0	0	RP11-465B22.8	ENSG00000272141.1_4	1	ENST00000606993.1_1	1
ENSG00000205231.1_4	chr1	1108436	1114935	-	3532	0	0	0	0	0	0	0	0	0	0	0	0	RP11-465B22.6	ENSG00000205231.1_4	1	ENST00000379317.1_1	2
ENSG00000162571.13_3	chr1	1109264	1133315	+	3943	0	0	0	0	0	0	0	0	0	0	0	0	TTLL10	ENSG00000162571.13_3	7	ENST00000506177.1_1,ENST00000379290.5_1,ENST00000379289.5_1,ENST00000379288.3_1,ENST00000460998.1_1,ENST00000514695.1_1,ENST00000486379.1_3	2,16,16,9,5,2,5
ENSG00000186891.13_3	chr1	1138888	1142071	-	1370	0	0	0	0	0	0	0	0	0	0	0	0	TNFRSF18	ENSG00000186891.13_3	4	ENST00000328596.10_3,ENST00000379268.6_3,ENST00000486728.5_1,ENST00000379265.5_1	4,5,4,5
ENSG00000186827.10_2	chr1	1146706	1149518	-	1721	0	0	1	1	0	0	0	0	0	0	0	0	TNFRSF4	ENSG00000186827.10_2	3	ENST00000379236.3_1,ENST00000497869.5_1,ENST00000453580.1_1	7,5,4
ENSG00000078808.16_2	chr1	1152288	1167411	-	4709	357	504	727	534	372	344	245	293	401	469	531	365	SDF4	ENSG00000078808.16_2	7	ENST00000360001.10_1,ENST00000465727.5_1,ENST00000263741.11_1,ENST00000494748.1_1,ENST00000478938.1_1,ENST00000403997.2_1,ENST00000459994.2_1	7,7,7,3,2,5,3
ENSG00000176022.4_3	chr1	1167645	1170421	+	2777	174	174	228	193	204	144	105	114	197	229	200	222	B3GALT6	ENSG00000176022.4_3	1	ENST00000379198.3_1	1
ENSG00000184163.3_2	chr1	1177826	1182102	-	1794	4	5	10	10	0	0	1	2	2	2	4	11	C1QTNF12	ENSG00000184163.3_2	5	ENST00000462849.1_1,ENST00000478606.1_1,ENST00000330388.2_1,ENST00000468365.1_1,ENST00000486627.1_1	3,2,8,3,2
ENSG00000260179.1_4	chr1	1185157	1186714	-	1558	2	7	9	4	0	5	0	1	0	1	3	0	RP5-902P8.12	ENSG00000260179.1_4	1	ENST00000565563.1_1	1
ENSG00000160087.20_3	chr1	1189289	1209265	-	4712	303	476	605	456	368	398	279	297	441	471	551	482	UBE2J2	ENSG00000160087.20_3	20	ENST00000450390.6_1,ENST00000347370.6_1,ENST00000349431.10_1,ENST00000400929.6_1,ENST00000464036.5_1,ENST00000360466.6_1,ENST00000400930.8_1,ENST00000467339.1_1,ENST00000473215.5_1,ENST00000435198.5_1,ENST00000509720.5_1,ENST00000491779.5_1,ENST00000466752.5_1,ENST00000503294.5_1,ENST00000477894.5_1,ENST00000471154.1_1,ENST00000422076.5_1,ENST00000502382.1_2,ENST00000461142.3_1,ENST00000488418.2_1	8,7,7,6,8,7,8,2,7,7,5,4,6,6,6,3,5,5,3,2
ENSG00000230415.1_3	chr1	1210603	1215800	+	513	51	33	29	32	16	26	22	17	18	8	14	25	RP5-902P8.10	ENSG00000230415.1_3	2	ENST00000434139.1_1,ENST00000453732.1_1	3,2
ENSG00000162572.20_2	chr1	1215816	1227409	+	4025	141	183	170	125	108	115	85	122	224	146	104	160	SCNN1D	ENSG00000162572.20_2	8	ENST00000379116.9_1,ENST00000379101.8_1,ENST00000338555.6_1,ENST00000400928.7_1,ENST00000470022.1_1,ENST00000325425.12_1,ENST00000467651.2_1,ENST00000379099.3_1	18,17,15,16,4,15,4,7
ENSG00000131584.18_2	chr1	1227756	1244989	-	8809	686	906	1032	891	754	656	590	642	913	1132	762	870	ACAP3	ENSG00000131584.18_2	13	ENST00000354700.9_1,ENST00000492936.5_1,ENST00000467278.5_1,ENST00000353662.4_1,ENST00000470659.1_1,ENST00000379037.6_1,ENST00000476572.1_1,ENST00000493992.1_1,ENST00000472541.5_1,ENST00000354980.7_1,ENST00000478065.5_1,ENST00000479108.5_1,ENST00000438966.1_1	24,22,14,21,2,4,6,2,9,8,3,5,4
ENSG00000169972.11_2	chr1	1243947	1247057	+	2489	359	493	394	377	578	467	325	393	611	424	398	592	PUSL1	ENSG00000169972.11_2	5	ENST00000379031.9_1,ENST00000470520.5_1,ENST00000463758.1_1,ENST00000467712.1_1,ENST00000493657.1_1	8,6,2,6,4
ENSG00000127054.20_3	chr1	1246965	1260071	-	8220	1339	1995	1986	1689	1281	1101	1009	1152	1617	1603	1833	1870	INTS11	ENSG00000127054.20_3	50	ENST00000470030.6_1,ENST00000540437.5_1,ENST00000545578.5_1,ENST00000620829.4_1,ENST00000618806.4_1,ENST00000435064.5_1,ENST00000497304.6_1,ENST00000323275.10_1,ENST00000411962.5_1,ENST00000462432.5_1,ENST00000478641.5_1,ENST00000421495.6_1,ENST00000458452.7_1,ENST00000419704.5_1,ENST00000532772.5_1,ENST00000450926.6_1,ENST00000527098.5_1,ENST00000485710.5_1,ENST00000461514.6_1,ENST00000525164.5_…	10,19,18,15,12,17,3,16,15,13,6,14,19,15,13,17,18,7,4,5,14,6,7,7,4,5,7,2,4,7,7,5,9,8,8,3,2,3,4,3,2,4,4,4,4,4,6,4,4,2
ENSG00000240731.1_5	chr1	1252961	1254069	-	386	0	3	1	1	6	2	0	3	0	0	23	10	RP5-890O3.9	ENSG00000240731.1_5	1	ENST00000444968.1_1	2
ENSG00000224051.6_2	chr1	1260136	1264277	+	2556	388	650	636	552	361	396	143	189	513	589	560	578	CPTP	ENSG00000224051.6_2	3	ENST00000464957.1_1,ENST00000343938.8_1,ENST00000488011.1_1	2,3,3
ENSG00000169962.4_2	chr1	1266694	1270686	+	3433	1	4	0	4	2	0	0	2	0	0	0	6	TAS1R3	ENSG00000169962.4_2	1	ENST00000339381.5_1	6
ENSG00000107404.19_4	chr1	1270656	1284730	-	3814	1060	1457	1235	1475	1374	1042	1007	1032	1279	1438	1093	1275	DVL1	ENSG00000107404.19_4	8	ENST00000378891.9_3,ENST00000378888.9_4,ENST00000610709.2_1,ENST00000632445.1_2,ENST00000631679.1_1,ENST00000634054.1_1,ENST00000633096.1_1,ENST00000472445.1_1	15,15,9,6,8,5,3,4
ENSG00000162576.16_2	chr1	1288069	1297157	-	3622	118	181	279	315	138	102	72	110	163	242	137	195	MXRA8	ENSG00000162576.16_2	10	ENST00000474033.5_1,ENST00000342753.8_1,ENST00000309212.10_1,ENST00000445648.5_1,ENST00000477278.3_1,ENST00000473097.5_1,ENST00000478517.5_1,ENST00000476718.1_1,ENST00000464351.1_1,ENST00000460473.1_1	4,9,10,10,10,4,3,5,2,2
ENSG00000175756.13_2	chr1	1309110	1310875	-	1669	120	139	174	196	145	185	133	106	154	179	211	220	AURKAIP1	ENSG00000175756.13_2	6	ENST00000338370.7_1,ENST00000338338.9_1,ENST00000321751.9_1,ENST00000378853.3_1,ENST00000489799.1_1,ENST00000496905.1_1	3,4,4,4,2,2
ENSG00000223663.2_4	chr1	1314046	1314412	+	367	2	0	0	0	0	2	0	6	0	0	0	0	RP5-890O3.3	ENSG00000223663.2_4	1	ENST00000435351.2_1	1
ENSG00000221978.11_2	chr1	1321091	1334708	-	6850	1760	2121	2814	2598	1666	1385	1285	1392	2049	1796	1916	1808	CCNL2	ENSG00000221978.11_2	20	ENST00000480479.5_1,ENST00000482621.5_1,ENST00000463260.5_1,ENST00000400809.7_1,ENST00000496007.5_1,ENST00000482365.5_1,ENST00000408952.8_1,ENST00000481223.6_1,ENST00000418865.6_1,ENST00000505849.5_1,ENST00000488340.5_1,ENST00000492998.5_1,ENST00000469113.5_1,ENST00000480646.1_1,ENST00000471930.5_1,ENST00000408918.8_1,ENST00000473872.5_1,ENST00000425598.2_1,ENST00000463895.1_1,ENST00000497013.1_1	8,10,3,11,13,7,10,12,6,9,12,7,6,4,5,6,3,5,2,3
ENSG00000224870.6_4	chr1	1334902	1337426	+	2525	18	54	60	40	47	29	22	26	21	80	89	39	RP4-758J18.2	ENSG00000224870.6_4	8	ENST00000448629.5_1,ENST00000444362.2_1,ENST00000418833.2_1,ENST00000576232.1_1,ENST00000570344.1_1,ENST00000447725.2_1,ENST00000572242.1_1,ENST00000453521.1_1	3,3,2,2,2,3,1,2
ENSG00000242485.5_2	chr1	1337288	1342693	-	2788	508	675	645	557	574	523	375	465	809	516	426	714	MRPL20	ENSG00000242485.5_2	6	ENST00000344843.11_1,ENST00000493287.5_1,ENST00000487659.1_1,ENST00000492508.1_1,ENST00000482352.1_1,ENST00000477686.1_1	4,3,3,3,3,3
ENSG00000264293.1	chr1	1340841	1341132	-	292	1	11	0	2	3	0	0	0	0	0	0	0	RN7SL657P	ENSG00000264293.1	1	ENST00000582431.1	1
ENSG00000272455.1_4	chr1	1344476	1345998	+	1523	22	17	49	43	36	23	12	16	31	21	16	25	RP4-758J18.13	ENSG00000272455.1_4	1	ENST00000607307.1_1	1
ENSG00000235098.8_3	chr1	1353800	1357149	-	2644	3	0	0	1	0	0	0	0	0	0	0	2	ANKRD65	ENSG00000235098.8_3	5	ENST00000520296.5_1,ENST00000427211.3_1,ENST00000537107.5_2,ENST00000454272.2_1,ENST00000442470.1_1	3,3,4,3,2
ENSG00000225905.1_4	chr1	1355625	1358071	+	543	7	0	0	2	0	7	0	0	0	0	0	5	RP4-758J18.7	ENSG00000225905.1_4	1	ENST00000428932.1_1	2
ENSG00000205116.3_2	chr1	1361508	1363167	+	492	0	0	0	0	0	0	0	0	0	0	0	0	TMEM88B	ENSG00000205116.3_2	1	ENST00000378821.3_1	2
ENSG00000225285.1_3	chr1	1365919	1369953	-	851	6	11	3	6	8	1	2	12	16	29	27	20	RP4-758J18.10	ENSG00000225285.1_3	4	ENST00000430109.1_1,ENST00000434150.1_1,ENST00000454562.1_1,ENST00000417917.1_1	2,2,2,2
ENSG00000179403.11_3	chr1	1370241	1378262	+	5065	248	358	263	254	293	222	198	167	361	498	354	306	VWA1	ENSG00000179403.11_3	4	ENST00000495558.1_2,ENST00000338660.5_1,ENST00000476993.1_1,ENST00000471398.1_1	2,3,3,2
ENSG00000215915.9_3	chr1	1385069	1405538	+	3976	0	8	0	4	0	0	0	2	13	1	12	7	ATAD3C	ENSG00000215915.9_3	3	ENST00000378785.6_1,ENST00000475091.2_2,ENST00000484537.2_1	12,6,2
ENSG00000160072.19_2	chr1	1407149	1433228	+	7682	210	265	237	235	181	211	187	146	290	239	203	285	ATAD3B	ENSG00000160072.19_2	5	ENST00000308647.7_1,ENST00000472194.6_1,ENST00000378736.3_1,ENST00000485748.5_1,ENST00000474481.1_1	16,14,4,10,5
ENSG00000284740.1_1	chr1	1438630	1444832	+	660	4	10	7	7	5	16	0	0	5	4	1	1	RP5-832C2.8	ENSG00000284740.1_1	2	ENST00000641974.1_1,ENST00000641679.1_1	2,2
ENSG00000197785.13_3	chr1	1447531	1470067	+	3069	182	194	229	228	187	236	168	180	198	155	157	224	ATAD3A	ENSG00000197785.13_3	7	ENST00000378756.7_2,ENST00000378755.9_2,ENST00000339113.8_1,ENST00000536055.5_2,ENST00000439513.1_1,ENST00000429957.1_1,ENST00000400830.3_1	16,16,16,16,2,5,6
ENSG00000205090.8_2	chr1	1470554	1475833	-	1380	0	3	8	9	5	1	4	0	9	16	3	4	TMEM240	ENSG00000205090.8_2	3	ENST00000378733.8_1,ENST00000425828.1_1,ENST00000624426.1_1	4,5,2
ENSG00000160075.11_2	chr1	1477053	1510249	-	6925	1164	1359	1834	1357	1119	1035	748	719	1658	1619	1589	1460	SSU72	ENSG00000160075.11_2	4	ENST00000291386.3_1,ENST00000378726.1_1,ENST00000378725.3_1,ENST00000359060.5_1	5,3,3,2
ENSG00000215791.2	chr1	1497726	1499904	-	2178	297	219	225	182	203	175	153	154	413	669	371	374	AL645728.2	ENSG00000215791.2	1	ENST00000539195.1	2
ENSG00000215014.4_5	chr1	1510355	1512455	+	2101	10	3	7	5	19	6	4	15	6	20	7	9	RP5-832C2.5	ENSG00000215014.4_5	1	ENST00000366221.3_2	1
ENSG00000236684.1	chr1	1515136	1515379	+	243	0	0	0	0	0	0	0	0	0	0	0	0	AL645728.3	ENSG00000236684.1	1	ENST00000426195.1	2
ENSG00000274481.1_4	chr1	1518890	1519289	-	400	0	0	0	0	0	0	0	0	0	0	0	0	RP11-345P4.11	ENSG00000274481.1_4	1	ENST00000621860.1_1	1
ENSG00000228594.3_4	chr1	1533392	1535476	-	2085	936	1408	678	690	961	858	592	842	1453	1163	1026	1157	C1orf233	ENSG00000228594.3_4	1	ENST00000422725.3_1	1
ENSG00000272106.1_4	chr1	1549138	1551175	-	2038	75	77	53	56	54	41	22	48	78	22	33	91	RP11-345P4.9	ENSG00000272106.1_4	1	ENST00000607222.1_2	1
ENSG00000197530.12_4	chr1	1550795	1565990	+	8767	73	78	173	195	46	85	115	106	198	357	142	205	MIB2	ENSG00000197530.12_4	32	ENST00000520777.5_1,ENST00000355826.9_1,ENST00000518681.5_1,ENST00000505820.6_1,ENST00000479659.5_1,ENST00000489635.5_1,ENST00000511502.5_1,ENST00000477990.1_1,ENST00000514363.1_1,ENST00000487053.5_1,ENST00000502470.5_1,ENST00000378712.5_1,ENST00000507082.1_1,ENST00000463492.1_1,ENST00000510793.5_3,ENST00000504599.5_2,ENST00000507229.5_1,ENST00000503789.5_1,ENST00000378708.5_1,ENST00000506488.5_1…	20,20,19,20,19,20,19,2,6,21,5,18,2,3,4,19,14,4,18,17,3,2,16,4,2,3,3,5,5,5,3,2
ENSG00000189409.13_4	chr1	1567474	1570639	+	2273	0	0	0	0	0	0	0	0	0	4	2	2	MMP23B	ENSG00000189409.13_4	10	ENST00000356026.9_1,ENST00000472264.1_1,ENST00000512731.5_1,ENST00000378675.7_1,ENST00000479814.5_1,ENST00000435358.5_1,ENST00000503792.1_2,ENST00000489782.1_1,ENST00000486400.1_1,ENST00000490017.1_1	8,3,6,7,6,4,5,4,2,3
ENSG00000248333.8_3	chr1	1570603	1590473	-	3207	199	231	318	334	257	211	194	158	259	303	244	203	CDK11B	ENSG00000248333.8_3	9	ENST00000341832.10_3,ENST00000407249.7_3,ENST00000615951.4_1,ENST00000340677.9_3,ENST00000611150.3_1,ENST00000629289.2_3,ENST00000626918.2_3,ENST00000629312.2_3,ENST00000341028.8_1	20,18,16,19,17,22,21,22,7
ENSG00000272004.1_4	chr1	1590786	1594063	+	400	0	0	2	7	5	0	0	0	5	0	23	1	RP11-345P4.10	ENSG00000272004.1_4	1	ENST00000607013.1_2	2
ENSG00000189339.11_2	chr1	1590990	1624167	-	8360	1408	1842	1884	1736	1240	1154	742	888	1472	1115	1614	1734	SLC35E2B	ENSG00000189339.11_2	5	ENST00000614300.4_1,ENST00000617444.4_1,ENST00000611123.1_1,ENST00000480991.1_1,ENST00000481276.1_1	7,13,12,4,5
ENSG00000269737.2_5	chr1	1603429	1605836	+	1819	0	0	0	0	0	0	0	0	0	0	0	0	RP11-345P4.6	ENSG00000269737.2_5	2	ENST00000596308.1_1,ENST00000597891.1_1	1,2
ENSG00000215914.4_2	chr1	1631381	1633221	+	1017	0	0	0	1	0	0	0	0	0	1	5	2	MMP23A	ENSG00000215914.4_2	1	ENST00000234610.5_1	7
ENSG00000008128.22_4	chr1	1634169	1655763	-	4701	137	199	296	261	152	161	87	99	160	160	147	142	CDK11A	ENSG00000008128.22_4	23	ENST00000356200.7_2,ENST00000463652.5_1,ENST00000356937.7_1,ENST00000378638.6_2,ENST00000509982.5_1,ENST00000404249.7_1,ENST00000460465.5_1,ENST00000357760.6_3,ENST00000358779.9_2,ENST00000378633.5_3,ENST00000478901.1_1,ENST00000468397.1_1,ENST00000491311.1_1,ENST00000495016.5_1,ENST00000468800.5_1,ENST00000464748.1_1,ENST00000489300.1_1,ENST00000492390.5_1,ENST00000474916.1_1,ENST00000479362.1_3…	19,5,17,20,19,20,20,20,20,20,2,4,4,3,5,3,2,5,4,5,2,2,2
ENSG00000268575.1_5	chr1	1634175	1669127	-	5079	197	291	407	319	219	230	137	173	233	275	223	225	RP1-283E3.8	ENSG00000268575.1_5	1	ENST00000598846.1_1	20
ENSG00000227775.3_4	chr1	1655951	1668690	+	2759	0	2	0	0	2	0	2	6	0	5	4	0	RP1-283E3.4	ENSG00000227775.3_4	4	ENST00000577672.1_1,ENST00000417099.1_1,ENST00000424604.1_1,ENST00000418950.2_1	2,2,2,2
ENSG00000215790.7_4	chr1	1656277	1677438	-	7713	547	676	640	459	453	476	225	304	529	461	574	613	SLC35E2	ENSG00000215790.7_4	6	ENST00000647043.1_1,ENST00000355439.7_2,ENST00000643905.1_1,ENST00000475229.2_1,ENST00000246421.4_2,ENST00000643943.1_1	7,7,6,3,6,4
ENSG00000008130.15_2	chr1	1682671	1711896	-	5570	1992	2502	2780	2531	2285	1968	1516	1493	1918	2208	2200	2169	NADK	ENSG00000008130.15_2	17	ENST00000341426.9_1,ENST00000341991.7_1,ENST00000378625.5_1,ENST00000342348.9_1,ENST00000498806.1_1,ENST00000469045.5_1,ENST00000480499.5_1,ENST00000497747.5_1,ENST00000477235.5_1,ENST00000489538.1_1,ENST00000497615.1_1,ENST00000497186.5_1,ENST00000492845.6_1,ENST00000492768.5_1,ENST00000460602.5_1,ENST00000464373.1_1,ENST00000480542.1_1	12,12,14,10,3,8,4,3,6,5,2,7,6,5,4,3,3
ENSG00000078369.17_2	chr1	1716724	1822556	-	6417	9193	12567	8905	7285	8759	8760	7742	6834	9941	11459	9479	10521	GNB1	ENSG00000078369.17_2	10	ENST00000610897.4_1,ENST00000615252.4_1,ENST00000378609.8_1,ENST00000461893.5_1,ENST00000471354.1_1,ENST00000439272.6_1,ENST00000434686.6_1,ENST00000437146.1_1,ENST00000607589.1_1,ENST00000472614.2_1	11,10,12,3,7,8,9,6,1,3
ENSG00000231050.1_4	chr1	1822910	1824097	+	906	192	323	330	245	245	191	101	142	355	261	285	325	RP1-140A9.1	ENSG00000231050.1_4	1	ENST00000412228.1_1	2
ENSG00000169885.9_2	chr1	1846266	1848735	+	2321	2	11	10	12	7	13	0	13	10	25	9	3	CALML6	ENSG00000169885.9_2	4	ENST00000307786.7_2,ENST00000378604.3_2,ENST00000482402.1_1,ENST00000462293.1_1	6,5,3,3
ENSG00000178821.12_3	chr1	1849029	1850712	-	1594	294	453	474	428	375	303	150	264	577	447	494	508	TMEM52	ENSG00000178821.12_3	6	ENST00000378602.3_1,ENST00000310991.7_1,ENST00000378598.4_2,ENST00000470931.2_1,ENST00000602604.1_1,ENST00000416272.1_2	2,5,3,4,4,3
ENSG00000142609.18_4	chr1	1853390	1935276	-	10422	10	32	92	42	37	65	27	29	82	128	88	71	CFAP74	ENSG00000142609.18_4	10	ENST00000642590.1_1,ENST00000493964.5_4,ENST00000464311.5_1,ENST00000412120.2_1,ENST00000493316.5_1,ENST00000270720.11_1,ENST00000468610.5_1,ENST00000461752.3_1,ENST00000378592.1_1,ENST00000378590.4_4	25,38,10,11,5,18,19,4,7,4
ENSG00000233542.1_4	chr1	1944652	1946969	-	1954	6	0	0	0	0	0	0	0	6	0	0	0	RP11-547D24.1	ENSG00000233542.1_4	1	ENST00000443930.1_1	2
ENSG00000187730.8_2	chr1	1950737	1962197	+	5556	89	107	93	64	76	75	50	64	173	210	99	136	GABRD	ENSG00000187730.8_2	19	ENST00000378585.6_2,ENST00000638411.1_1,ENST00000639045.1_1,ENST00000640067.1_1,ENST00000638604.1_1,ENST00000638771.1_1,ENST00000639935.1_1,ENST00000640949.1_1,ENST00000640030.1_1,ENST00000640423.1_1,ENST00000639625.1_1,ENST00000639777.1_1,ENST00000640981.1_1,ENST00000638763.1_1,ENST00000639070.1_1,ENST00000640892.1_1,ENST00000640317.1_1,ENST00000638804.1_1,ENST00000640688.1_1	9,9,10,9,8,8,4,9,8,9,1,8,6,4,5,4,4,5,3
ENSG00000226969.1_4	chr1	1980642	1981509	-	538	3	0	5	12	0	0	1	3	7	14	13	13	RP11-547D24.3	ENSG00000226969.1_4	2	ENST00000445600.1_1,ENST00000449154.1_1	2,3
ENSG00000067606.16_3	chr1	1981909	2116834	+	7636	308	456	479	490	367	271	230	285	312	261	332	249	PRKCZ	ENSG00000067606.16_3	26	ENST00000378567.7_1,ENST00000468310.5_1,ENST00000484419.1_1,ENST00000503297.1_2,ENST00000479566.5_1,ENST00000466651.5_1,ENST00000400921.6_1,ENST00000495347.5_3,ENST00000461106.6_1,ENST00000461465.5_1,ENST00000470596.5_1,ENST00000496325.5_1,ENST00000481140.5_1,ENST00000482686.5_2,ENST00000486681.5_3,ENST00000470986.5_3,ENST00000470511.5_3,ENST00000471018.6_1,ENST00000466352.5_3,ENST00000497183.5_3…	18,6,2,4,4,4,15,5,15,6,6,6,6,6,8,6,6,5,4,7,4,13,5,14,8,6
ENSG00000271806.1_4	chr1	2072523	2076718	-	4196	0	0	0	0	0	0	0	0	0	0	0	0	RP5-892K4.1	ENSG00000271806.1_4	1	ENST00000606533.1_1	1
ENSG00000182873.5_4	chr1	2113233	2115828	-	1734	6	15	1	8	2	3	1	0	0	10	10	15	RP11-181G12.2	ENSG00000182873.5_4	2	ENST00000333854.2_1,ENST00000444529.1_1	2,3
ENSG00000162585.16_3	chr1	2115900	2144159	-	10916	386	468	744	523	493	393	246	389	523	543	517	633	FAAP20	ENSG00000162585.16_3	15	ENST00000400919.7_1,ENST00000469733.5_1,ENST00000428120.5_1,ENST00000414253.5_1,ENST00000400918.7_2,ENST00000497675.2_1,ENST00000378543.2_1,ENST00000378546.8_2,ENST00000401813.7_1,ENST00000487186.5_1,ENST00000476803.1_1,ENST00000440825.6_1,ENST00000420515.1_2,ENST00000514625.1_1,ENST00000420964.1_1	3,8,8,7,4,2,3,4,4,8,3,4,4,3,2
ENSG00000269554.1	chr1	2121237	2123179	+	1943	29	34	20	26	22	22	11	14	60	53	64	23	AL590822.2	ENSG00000269554.1	1	ENST00000597060.1	1
ENSG00000203301.2	chr1	2143360	2145620	-	2261	0	3	0	0	6	8	5	5	1	7	2	9	AL590822.1	ENSG00000203301.2	1	ENST00000545087.1	1
ENSG00000234396.3_4	chr1	2143962	2152177	+	326	0	0	0	0	0	0	0	0	0	0	1	0	RP11-181G12.4	ENSG00000234396.3_4	1	ENST00000442483.2_1	2
ENSG00000157933.9_2	chr1	2160134	2241558	+	6080	1190	1403	1718	1382	1312	1330	1459	1179	1735	2553	1525	1637	SKI	ENSG00000157933.9_2	4	ENST00000378536.4_1,ENST00000508416.1_1,ENST00000478223.2_1,ENST00000507179.1_1	7,2,3,2
ENSG00000116151.13_4	chr1	2252692	2323146	-	11337	97	173	251	179	134	121	79	78	190	249	239	226	MORN1	ENSG00000116151.13_4	11	ENST00000378531.7_1,ENST00000606372.5_1,ENST00000378529.7_1,ENST00000607342.5_1,ENST00000469374.5_1,ENST00000419785.1_1,ENST00000449373.2_4,ENST00000378525.2_1,ENST00000607031.1_1,ENST00000475812.1_1,ENST00000494279.2_3	14,12,11,4,5,4,5,7,1,2,2
ENSG00000272161.1_5	chr1	2257640	2258132	-	493	0	0	4	0	7	0	0	0	0	0	16	3	RP4-713A8.1	ENSG00000272161.1_5	1	ENST00000607720.1_1	1
ENSG00000269753.1	chr1	2258581	2259042	+	462	0	0	0	0	0	0	0	0	0	0	0	0	AL589739.1	ENSG00000269753.1	1	ENST00000600779.1	1
ENSG00000269896.2_4	chr1	2281853	2284259	-	2407	23	45	91	54	56	23	27	19	66	121	94	82	RP4-740C4.5	ENSG00000269896.2_4	2	ENST00000602865.1_1,ENST00000417061.2_1	1,1
ENSG00000272420.1_5	chr1	2294500	2295067	-	568	1	4	6	6	0	0	2	0	0	9	2	0	RP4-740C4.7	ENSG00000272420.1_5	1	ENST00000607858.1_1	1
ENSG00000178642.5	chr1	2316811	2319922	+	3110	0	0	0	0	0	0	0	0	0	0	0	0	AL513477.1	ENSG00000178642.5	1	ENST00000317490.5	2
ENSG00000157916.19_3	chr1	2323214	2336883	+	5691	224	292	237	217	292	231	157	169	216	203	293	240	RER1	ENSG00000157916.19_3	9	ENST00000378513.7_1,ENST00000378518.5_1,ENST00000605895.5_3,ENST00000306256.13_3,ENST00000493207.1_1,ENST00000378512.5_1,ENST00000443438.5_1,ENST00000488353.2_3,ENST00000462129.1_1	6,5,7,8,2,7,6,6,2
ENSG00000157911.9_3	chr1	2335403	2345236	-	3789	347	398	646	440	300	214	211	208	269	295	325	340	PEX10	ENSG00000157911.9_3	8	ENST00000288774.7_1,ENST00000447513.6_1,ENST00000507596.5_1,ENST00000510434.1_1,ENST00000508384.5_2,ENST00000515760.1_1,ENST00000502666.1_2,ENST00000514502.1_1	6,6,6,5,3,2,3,4
ENSG00000149527.17_4	chr1	2357419	2436969	+	10781	0	1	0	1	0	1	0	5	0	3	2	0	PLCH2	ENSG00000149527.17_4	8	ENST00000609981.5_3,ENST00000449969.5_4,ENST00000419816.6_3,ENST00000378486.7_3,ENST00000343889.8_1,ENST00000278878.6_3,ENST00000473964.5_1,ENST00000462379.1_1	4,22,22,22,19,19,4,6
ENSG00000224387.1_4	chr1	2423739	2424697	-	455	1	2	0	0	0	0	3	0	12	2	0	8	RP3-395M20.2	ENSG00000224387.1_4	1	ENST00000424657.1_1	2
ENSG00000229393.1_4	chr1	2424876	2425918	-	514	9	0	0	0	5	3	1	6	4	0	4	4	RP3-395M20.3	ENSG00000229393.1_4	1	ENST00000442305.1_1	2
ENSG00000157881.13_3	chr1	2439972	2458067	-	5107	456	423	622	395	431	332	233	317	468	279	466	413	PANK4	ENSG00000157881.13_3	12	ENST00000378466.7_2,ENST00000435556.7_2,ENST00000505228.5_1,ENST00000502512.1_3,ENST00000471361.1_1,ENST00000487804.1_1,ENST00000515423.1_1,ENST00000468002.2_1,ENST00000486396.1_3,ENST00000502770.1_3,ENST00000491212.1_1,ENST00000514922.1_1	19,19,16,8,4,2,2,6,6,3,3,2
ENSG00000197921.5_2	chr1	2460184	2461684	-	1306	0	0	0	0	14	6	10	17	1	21	9	10	HES5	ENSG00000197921.5_2	1	ENST00000378453.3_1	3
ENSG00000272449.2_4	chr1	2461503	2478899	+	1531	0	6	5	7	8	3	4	11	8	24	2	4	RP3-395M20.12	ENSG00000272449.2_4	2	ENST00000644246.1_1,ENST00000606645.2_2	2,1
ENSG00000238164.6_5	chr1	2481359	2488470	-	6137	1	0	4	4	0	0	0	0	19	0	7	4	RP3-395M20.8	ENSG00000238164.6_5	6	ENST00000449660.5_1,ENST00000443892.2_1,ENST00000416860.2_2,ENST00000448624.2_1,ENST00000432521.2_1,ENST00000452793.1_1	3,2,6,2,2,4
ENSG00000157873.17_3	chr1	2487078	2496821	+	6219	4	23	7	20	11	26	3	15	37	58	52	40	TNFRSF14	ENSG00000157873.17_3	16	ENST00000426449.5_2,ENST00000434817.5_2,ENST00000435221.6_2,ENST00000451778.5_2,ENST00000409119.5_1,ENST00000355716.4_1,ENST00000475523.5_1,ENST00000442392.6_1,ENST00000482074.6_1,ENST00000496064.5_1,ENST00000463471.6_1,ENST00000466750.5_1,ENST00000471768.1_1,ENST00000463835.5_1,ENST00000482602.5_1,ENST00000480305.1_1	6,7,7,7,7,8,6,4,3,5,5,6,3,4,4,3
ENSG00000225931.3_4	chr1	2497849	2501327	+	1297	0	0	0	0	0	0	0	0	0	0	5	0	RP3-395M20.7	ENSG00000225931.3_4	1	ENST00000456687.3_1	3
ENSG00000228037.1_4	chr1	2512999	2515972	+	626	0	0	0	0	0	0	0	0	0	5	0	0	RP3-395M20.9	ENSG00000228037.1_4	1	ENST00000424215.1_1	3
ENSG00000157870.14_3	chr1	2517930	2522908	+	3371	150	176	180	200	133	110	95	104	190	152	165	236	FAM213B	ENSG00000157870.14_3	15	ENST00000493183.5_1,ENST00000474659.5_1,ENST00000444521.6_1,ENST00000378425.9_2,ENST00000419916.6_1,ENST00000378424.8_1,ENST00000537325.5_2,ENST00000378427.5_2,ENST00000464043.5_1,ENST00000465233.5_2,ENST00000498083.1_2,ENST00000481683.5_1,ENST00000484099.5_1,ENST00000477045.1_1,ENST00000476686.1_1	7,7,7,6,7,7,6,7,7,6,5,6,6,3,2
ENSG00000142606.15_4	chr1	2522078	2564429	-	3844	9	0	2	0	2	0	4	1	3	6	2	6	MMEL1	ENSG00000142606.15_4	9	ENST00000471840.5_1,ENST00000378412.7_1,ENST00000502556.5_3,ENST00000504800.5_1,ENST00000491941.5_1,ENST00000464195.1_1,ENST00000469962.1_1,ENST00000509374.1_1,ENST00000511099.1_1	3,24,19,23,2,2,3,5,2
ENSG00000237058.1_4	chr1	2564007	2568059	+	373	0	0	0	0	0	0	0	0	0	0	0	0	RP13-436F16.1	ENSG00000237058.1_4	1	ENST00000427302.1_1	2
ENSG00000215912.12_4	chr1	2567415	2718282	-	8814	264	311	243	226	168	213	95	111	226	196	267	196	TTC34	ENSG00000215912.12_4	2	ENST00000401095.8_4,ENST00000637179.1_3	9,7
ENSG00000283259.1_4	chr1	2690149	2693019	+	1565	0	0	0	7	2	0	0	0	0	8	0	3	ABC14-1188822O7.1	ENSG00000283259.1_4	1	ENST00000638002.1_1	10
ENSG00000233234.1_4	chr1	2728415	2729257	-	607	0	0	0	0	0	0	0	0	0	0	0	0	RP11-740P5.2	ENSG00000233234.1_4	1	ENST00000457440.1_1	2
ENSG00000231630.1_4	chr1	2730997	2731563	-	429	0	0	0	0	0	0	0	0	0	0	0	0	RP11-740P5.3	ENSG00000231630.1_4	1	ENST00000429389.1_1	2
ENSG00000284745.1_2	chr1	2877223	2885272	-	1654	0	0	0	0	0	0	0	0	0	0	0	0	RP5-907A6.1	ENSG00000284745.1_2	2	ENST00000641229.1_1,ENST00000642073.1_1	3,3
ENSG00000169717.6_3	chr1	2938047	2939467	+	1421	0	0	0	0	0	0	0	0	0	0	0	0	ACTRT2	ENSG00000169717.6_3	1	ENST00000378404.3_1	1
ENSG00000177133.10_4	chr1	2976179	2985001	-	5600	10	28	26	4	7	12	3	11	35	32	34	23	RP1-163G9.1	ENSG00000177133.10_4	8	ENST00000606861.1_1,ENST00000321399.7_1,ENST00000413472.5_1,ENST00000453118.5_1,ENST00000445317.1_1,ENST00000415573.1_1,ENST00000420957.1_1,ENST00000321336.1_1	1,6,4,3,7,2,2,2
ENSG00000142611.16_3	chr1	2985732	3355185	+	9767	328	418	355	331	282	161	129	184	126	66	80	131	PRDM16	ENSG00000142611.16_3	10	ENST00000511072.5_1,ENST00000607632.1_1,ENST00000378391.6_1,ENST00000514189.5_1,ENST00000270722.9_1,ENST00000512462.5_1,ENST00000463591.1_1,ENST00000509860.1_2,ENST00000378389.5_1,ENST00000606170.1_1	16,2,17,16,17,16,3,13,5,2
ENSG00000226286.1_4	chr1	3049491	3050273	-	469	0	0	0	0	0	0	0	0	0	0	0	0	RP1-163G9.2	ENSG00000226286.1_4	1	ENST00000440516.1_1	2
ENSG00000279839.1_5	chr1	3122552	3125228	+	2677	56	44	11	41	22	28	57	40	13	5	31	10	RP11-193J6.1	ENSG00000279839.1_5	1	ENST00000624175.1_1	1
ENSG00000272235.1_4	chr1	3223200	3226660	-	3461	0	0	0	0	0	0	0	0	0	0	0	0	RP11-22L13.1	ENSG00000272235.1_4	1	ENST00000607061.1_1	1
ENSG00000130762.14_4	chr1	3370990	3397677	+	5563	45	50	45	45	82	47	60	52	146	159	140	98	ARHGEF16	ENSG00000130762.14_4	7	ENST00000378378.8_2,ENST00000378373.5_2,ENST00000378371.6_2,ENST00000445297.5_1,ENST00000464620.1_1,ENST00000418137.1_3,ENST00000485984.1_1	15,13,12,4,3,5,8
ENSG00000272088.1_4	chr1	3403810	3404191	+	382	0	0	0	0	0	0	0	0	0	0	0	0	RP11-168F9.2	ENSG00000272088.1_4	1	ENST00000606489.1_1	1
ENSG00000162591.15_2	chr1	3406484	3528059	-	7039	44	35	53	57	25	16	4	17	21	21	23	28	MEGF6	ENSG00000162591.15_2	7	ENST00000294599.8_1,ENST00000356575.8_1,ENST00000494257.1_1,ENST00000485002.6_1,ENST00000491842.1_1,ENST00000475790.5_1,ENST00000461795.1_1	30,37,3,37,7,5,3
ENSG00000207776.1	chr1	3477259	3477354	-	96	0	0	0	0	0	0	0	0	0	0	0	0	MIR551A	ENSG00000207776.1	1	ENST00000385042.1	1
ENSG00000238260.1_4	chr1	3539754	3541307	-	622	0	0	0	0	5	5	0	0	0	0	0	0	RP11-46F15.2	ENSG00000238260.1_4	1	ENST00000435049.1_1	3
ENSG00000158109.14_2	chr1	3541566	3546691	+	2414	92	65	128	129	76	112	44	88	82	82	100	67	TPRG1L	ENSG00000158109.14_2	2	ENST00000378344.6_1,ENST00000344579.5_1	5,4
ENSG00000116213.15_2	chr1	3547331	3569325	-	7604	225	222	285	279	159	136	138	116	209	243	229	303	WRAP73	ENSG00000116213.15_2	10	ENST00000378322.7_1,ENST00000270708.11_1,ENST00000471223.1_1,ENST00000424367.5_1,ENST00000497940.5_1,ENST00000469643.1_1,ENST00000494884.1_1,ENST00000465916.5_1,ENST00000419924.2_1,ENST00000479331.1_1	11,12,2,9,5,3,2,8,6,2
ENSG00000078900.14_4	chr1	3569084	3652765	+	6763	285	439	353	343	375	283	224	284	272	222	226	214	TP73	ENSG00000078900.14_4	14	ENST00000378295.8_2,ENST00000604074.5_3,ENST00000354437.8_2,ENST00000357733.7_2,ENST00000346387.8_2,ENST00000603362.5_4,ENST00000604479.5_4,ENST00000378285.5_2,ENST00000378280.5_2,ENST00000378288.8_2,ENST00000603364.5_1,ENST00000604194.1_1,ENST00000378290.4_2,ENST00000604566.1_1	14,11,13,12,12,11,11,11,11,12,8,2,12,6
ENSG00000227589.1_4	chr1	3575502	3585336	-	754	3	0	0	0	0	0	0	0	0	0	0	0	RP5-1092A11.5	ENSG00000227589.1_4	1	ENST00000443034.1_1	3
ENSG00000235131.1_4	chr1	3628764	3630862	-	351	0	0	0	0	0	0	0	0	0	0	0	0	RP5-1092A11.2	ENSG00000235131.1_4	1	ENST00000416554.1_1	2
ENSG00000227372.11_3	chr1	3652165	3663900	-	7209	325	420	531	329	307	359	180	197	278	177	238	342	TP73-AS1	ENSG00000227372.11_3	10	ENST00000624167.1_2,ENST00000418088.5_2,ENST00000452079.5_2,ENST00000419973.1_2,ENST00000423764.5_3,ENST00000636630.1_1,ENST00000587071.5_2,ENST00000637775.1_1,ENST00000608600.1_1,ENST00000624948.1_3	1,6,4,3,5,6,4,8,5,4
ENSG00000162592.9_3	chr1	3663024	3688209	+	4285	0	0	0	0	0	0	0	0	3	0	0	1	CCDC27	ENSG00000162592.9_3	3	ENST00000636250.1_1,ENST00000294600.6_1,ENST00000462521.2_1	6,12,12
ENSG00000235169.8_4	chr1	3689325	3692546	+	981	20	25	21	27	19	18	7	5	11	5	5	31	SMIM1	ENSG00000235169.8_4	4	ENST00000642557.1_1,ENST00000561886.2_2,ENST00000444870.7_2,ENST00000452264.1_1	4,3,4,2
ENSG00000130764.9_2	chr1	3695122	3713068	-	4516	199	247	338	274	211	187	199	157	270	405	297	307	LRRC47	ENSG00000130764.9_2	3	ENST00000378251.2_1,ENST00000462356.5_1,ENST00000479239.1_1	7,4,5
ENSG00000266075.1	chr1	3699379	3699673	+	295	0	0	0	0	0	0	0	0	0	0	0	0	RN7SL574P	ENSG00000266075.1	1	ENST00000581512.1	1
ENSG00000272153.1_4	chr1	3701572	3702102	+	531	0	0	9	3	2	0	0	0	0	18	0	6	RP1-286D6.5	ENSG00000272153.1_4	1	ENST00000607459.1_1	1
ENSG00000116198.12_2	chr1	3728645	3773778	-	7876	454	480	923	698	443	440	324	338	683	605	706	663	CEP104	ENSG00000116198.12_2	11	ENST00000378230.7_1,ENST00000484420.1_1,ENST00000438539.5_1,ENST00000461667.1_1,ENST00000495701.1_1,ENST00000460038.5_1,ENST00000494653.5_1,ENST00000443466.1_1,ENST00000428079.5_1,ENST00000494951.1_1,ENST00000378223.3_1	22,2,7,6,2,4,12,4,7,4,7
ENSG00000169598.15_3	chr1	3773831	3801993	+	3870	76	47	57	47	31	27	45	28	55	66	44	53	DFFB	ENSG00000169598.15_3	12	ENST00000625756.2_1,ENST00000338895.7_2,ENST00000378209.7_2,ENST00000491998.5_1,ENST00000468793.5_1,ENST00000477548.5_1,ENST00000339350.7_1,ENST00000378206.5_1,ENST00000475969.5_1,ENST00000341385.4_1,ENST00000481945.1_1,ENST00000461150.1_1	3,7,7,8,8,8,7,7,7,4,3,2
ENSG00000264428.1	chr1	3800628	3800697	+	70	3	0	0	0	0	0	0	0	6	20	0	0	AL691523.1	ENSG00000264428.1	1	ENST00000579705.1	1
ENSG00000198912.10_2	chr1	3805689	3816857	-	4388	338	400	392	325	264	271	192	211	313	331	290	364	C1orf174	ENSG00000198912.10_2	3	ENST00000486765.5_1,ENST00000361605.3_1,ENST00000474140.1_1	5,4,3
ENSG00000236423.5_3	chr1	3816936	3833789	+	4064	11	4	17	6	31	6	9	3	44	33	9	38	RP13-15E13.1	ENSG00000236423.5_3	3	ENST00000413332.5_1,ENST00000442673.1_1,ENST00000439488.1_1	3,2,4
ENSG00000233304.6_3	chr1	4000625	4015322	+	3894	0	0	0	0	0	0	0	0	0	0	0	0	RP13-614K11.1	ENSG00000233304.6_3	3	ENST00000635619.1_1,ENST00000456897.5_1,ENST00000412674.1_1	3,3,3
ENSG00000226374.2_3	chr1	4004607	4009040	-	1852	0	0	0	0	0	0	0	0	0	0	0	0	RP13-614K11.2	ENSG00000226374.2_3	3	ENST00000635247.1_1,ENST00000635127.1_1,ENST00000425194.1_1	6,4,3
ENSG00000284668.1_2	chr1	4036193	4072759	+	1830	0	0	0	0	0	0	0	0	0	0	0	0	RP11-718D19.1	ENSG00000284668.1_2	3	ENST00000642026.1_1,ENST00000641562.1_1,ENST00000641078.1_1	3,6,4
ENSG00000284703.1_2	chr1	4072981	4079568	-	4817	0	0	0	0	0	0	0	0	0	0	0	0	RP11-718D19.2	ENSG00000284703.1_2	1	ENST00000642139.1_1	2
ENSG00000229280.1_3	chr1	4235588	4235959	-	372	0	0	0	0	0	0	0	0	0	0	0	0	RP11-374C13.1	ENSG00000229280.1_3	1	ENST00000449232.1_1	1
ENSG00000235054.3_3	chr1	4472087	4484749	+	2104	0	0	0	0	0	0	0	0	0	0	0	0	RP5-1166F10.1	ENSG00000235054.3_3	5	ENST00000635002.1_1,ENST00000423197.2_1,ENST00000635312.1_1,ENST00000633821.1_1,ENST00000635642.1_1	5,6,6,4,4
ENSG00000284694.1_2	chr1	4539191	4544435	-	3402	0	0	0	0	0	0	0	0	0	0	0	0	RP5-1166F10.2	ENSG00000284694.1_2	1	ENST00000641472.1_1	2
ENSG00000227169.2_4	chr1	4611795	4612205	-	356	0	0	0	0	0	0	0	0	0	0	0	0	RP1-37J18.1	ENSG00000227169.2_4	1	ENST00000438791.2_1	2
ENSG00000232596.2_3	chr1	4631541	4654069	+	1994	0	0	0	0	0	0	0	0	0	0	0	0	RP1-37J18.2	ENSG00000232596.2_3	3	ENST00000634256.1_1,ENST00000635556.1_1,ENST00000420522.1_1	2,4,5
ENSG00000196581.10_2	chr1	4714792	4852594	+	12405	0	0	0	0	0	0	0	0	0	0	0	0	AJAP1	ENSG00000196581.10_2	3	ENST00000378190.7_1,ENST00000378191.4_1,ENST00000466761.1_1	6,6,2
ENSG00000284739.1_2	chr1	5024014	5033358	-	464	0	0	0	0	0	0	0	0	0	0	0	0	RP4-603B14.2	ENSG00000284739.1_2	1	ENST00000641254.1_1	3
ENSG00000284674.1_2	chr1	5033441	5041628	+	1580	0	0	0	0	0	0	0	0	0	0	0	0	RP4-603B14.1	ENSG00000284674.1_2	1	ENST00000641403.1_1	5
ENSG00000231510.1_4	chr1	5146519	5150959	-	449	0	0	0	0	0	0	0	0	0	0	0	0	RP11-542C10.1	ENSG00000231510.1_4	1	ENST00000443270.1_1	4
ENSG00000284616.1_2	chr1	5361988	5367454	-	1225	0	0	0	0	0	0	0	0	0	0	0	0	RP4-703E10.1	ENSG00000284616.1_2	1	ENST00000641871.1_1	4
ENSG00000284692.1_2	chr1	5538796	5553117	-	2316	0	0	0	0	0	0	0	0	0	0	0	0	RP1-58B11.2	ENSG00000284692.1_2	2	ENST00000641426.1_1,ENST00000641860.1_1	3,3
ENSG00000284666.1_2	chr1	5540847	5542088	-	609	0	0	0	0	0	0	0	0	0	0	0	0	RP1-58B11.3	ENSG00000284666.1_2	1	ENST00000641583.1_1	2
ENSG00000260972.1_4	chr1	5553038	5554734	+	1697	0	0	0	0	0	0	0	0	0	0	0	0	RP1-58B11.1	ENSG00000260972.1_4	1	ENST00000564261.1_1	1
ENSG00000283356.1_4	chr1	5614807	5614941	+	135	0	0	0	0	0	0	0	0	0	0	0	0	RP3-491M17.1	ENSG00000283356.1_4	1	ENST00000637697.1_1	1
ENSG00000236948.2_5	chr1	5621769	5728355	-	1095	0	0	0	0	0	0	0	0	0	0	0	0	RP11-154H17.1	ENSG00000236948.2_5	2	ENST00000637702.1_1,ENST00000413887.1_1	3,2
ENSG00000264341.1	chr1	5624131	5624203	+	73	0	0	0	0	0	0	0	0	0	0	0	0	MIR4417	ENSG00000264341.1	1	ENST00000579887.1	1
ENSG00000216045.2	chr1	5875931	5876019	-	89	0	0	0	0	0	0	0	0	0	0	0	0	AL356693.1	ENSG00000216045.2	1	ENST00000401226.2	1
ENSG00000264101.1	chr1	5922732	5922801	-	70	0	0	0	0	0	0	0	0	4	0	0	0	MIR4689	ENSG00000264101.1	1	ENST00000582517.1	1
ENSG00000131697.17_4	chr1	5922871	6052533	-	13167	560	696	525	443	473	363	392	332	544	621	656	503	NPHP4	ENSG00000131697.17_4	11	ENST00000460696.1_1,ENST00000378161.5_1,ENST00000478423.6_1,ENST00000489180.6_1,ENST00000378156.8_2,ENST00000378169.7_1,ENST00000468253.1_1,ENST00000506941.1_1,ENST00000470763.1_1,ENST00000622020.4_2,ENST00000466897.1_1	3,3,26,33,30,27,3,2,2,20,6
ENSG00000266687.1	chr1	5953899	5953984	-	86	0	0	0	0	0	0	0	0	0	0	0	0	AL356261.1	ENSG00000266687.1	1	ENST00000585151.1	1
ENSG00000069424.14_2	chr1	6051526	6161253	+	9534	197	304	259	315	136	93	65	102	122	94	216	166	KCNAB2	ENSG00000069424.14_2	19	ENST00000378111.5_1,ENST00000378097.5_1,ENST00000493807.1_1,ENST00000378092.5_1,ENST00000478098.5_1,ENST00000445501.5_1,ENST00000352527.5_1,ENST00000341524.5_1,ENST00000389632.8_1,ENST00000428161.5_1,ENST00000602612.5_1,ENST00000435937.5_1,ENST00000164247.5_1,ENST00000459822.1_1,ENST00000472700.6_1,ENST00000378083.7_1,ENST00000458166.6_1,ENST00000462676.2_1,ENST00000481789.1_1	8,16,3,15,5,5,15,16,13,12,15,6,16,3,8,16,14,3,3
ENSG00000268332.1	chr1	6100630	6101399	-	81	0	0	0	0	0	0	0	0	0	0	0	0	AL035406.1	ENSG00000268332.1	1	ENST00000594544.1	2
ENSG00000116254.17_2	chr1	6161853	6240183	-	9890	170	171	229	194	175	168	89	166	172	146	108	147	CHD5	ENSG00000116254.17_2	6	ENST00000262450.7_1,ENST00000475121.1_1,ENST00000462991.5_1,ENST00000377999.5_1,ENST00000496404.1_1,ENST00000491020.1_1	42,3,31,21,34,6
ENSG00000116251.9_3	chr1	6241329	6269449	-	4900	657	688	834	736	604	485	542	381	1049	753	935	664	RPL22	ENSG00000116251.9_3	8	ENST00000484532.5_2,ENST00000234875.8_1,ENST00000480661.1_1,ENST00000497965.5_1,ENST00000471204.5_1,ENST00000465387.5_1,ENST00000462296.5_1,ENST00000465335.1_1	3,4,3,4,5,4,4,5
ENSG00000226944.1_5	chr1	6264900	6265840	-	378	6	22	13	18	14	15	3	2	24	5	32	24	RP1-120G22.11	ENSG00000226944.1_5	1	ENST00000455744.1_1	3
ENSG00000158286.12_2	chr1	6265535	6281359	+	6585	203	254	399	314	265	163	207	113	260	338	266	291	RNF207	ENSG00000158286.12_2	9	ENST00000466994.5_1,ENST00000484435.1_1,ENST00000377939.4_1,ENST00000485539.5_1,ENST00000496676.5_1,ENST00000463453.1_1,ENST00000496329.1_1,ENST00000492476.1_1,ENST00000483336.1_1	4,3,18,6,10,3,2,4,4
ENSG00000116237.15_2	chr1	6281253	6296032	-	4910	1603	1979	2380	1928	1521	1370	1122	1234	1947	2030	2144	1968	ICMT	ENSG00000116237.15_2	4	ENST00000343813.9_1,ENST00000495791.1_1,ENST00000489498.5_1,ENST00000474756.1_1	5,2,6,4
ENSG00000225077.2_2	chr1	6296300	6299504	+	1685	113	74	56	47	72	51	18	37	145	125	141	131	LINC00337	ENSG00000225077.2_2	2	ENST00000441724.1_1,ENST00000429480.2_1	5,2
ENSG00000173673.7_2	chr1	6304252	6305638	+	697	0	0	0	0	0	3	0	0	0	0	0	0	HES3	ENSG00000173673.7_2	1	ENST00000377898.3_1	4
ENSG00000158292.6_2	chr1	6307406	6321035	-	4082	309	547	529	494	386	302	142	212	534	526	600	623	GPR153	ENSG00000158292.6_2	1	ENST00000377893.2_1	6
ENSG00000097021.19_3	chr1	6324329	6454451	-	4124	748	808	987	916	786	646	483	589	354	421	535	442	ACOT7	ENSG00000097021.19_3	10	ENST00000608083.5_2,ENST00000377842.7_1,ENST00000377845.7_1,ENST00000377855.6_1,ENST00000377860.8_1,ENST00000418124.5_1,ENST00000545482.5_1,ENST00000361521.8_1,ENST00000473466.2_2,ENST00000481175.1_1	9,9,9,9,10,10,9,9,8,3
ENSG00000271746.1_4	chr1	6453615	6454451	+	837	18	34	20	23	19	8	10	14	34	28	42	37	RP1-202O8.3	ENSG00000271746.1_4	1	ENST00000607670.1_2	1
ENSG00000069812.11_2	chr1	6472478	6484730	-	5407	7	15	14	35	2	13	11	17	62	107	57	83	HES2	ENSG00000069812.11_2	6	ENST00000377837.5_1,ENST00000377836.8_1,ENST00000471190.1_1,ENST00000377834.8_1,ENST00000487437.5_1,ENST00000489730.1_1	4,3,2,4,3,3
ENSG00000187017.16_4	chr1	6484836	6521427	+	6952	1	8	16	23	15	8	3	1	40	63	31	41	ESPN	ENSG00000187017.16_4	18	ENST00000645284.1_1,ENST00000636330.1_2,ENST00000377828.5_2,ENST00000633651.1_1,ENST00000632142.1_1,ENST00000418286.1_3,ENST00000632803.1_1,ENST00000632593.1_2,ENST00000416731.5_1,ENST00000461727.6_2,ENST00000475228.6_4,ENST00000478323.1_2,ENST00000633239.1_1,ENST00000475479.2_2,ENST00000636644.1_3,ENST00000434576.2_4,ENST00000477679.2_2,ENST00000468561.2_2	13,11,13,3,3,5,3,2,8,8,7,3,7,3,4,6,4,2
ENSG00000265392.1	chr1	6489894	6489956	-	63	0	0	0	0	0	0	0	0	0	0	0	0	MIR4252	ENSG00000265392.1	1	ENST00000585139.1	1
ENSG00000231868.1_4	chr1	6503094	6507066	-	351	0	0	0	0	0	0	0	0	0	0	0	0	RP1-202O8.2	ENSG00000231868.1_4	1	ENST00000419034.1_1	3
ENSG00000215788.9_3	chr1	6521211	6526255	-	3918	14	60	62	46	11	19	17	8	27	22	66	48	TNFRSF25	ENSG00000215788.9_3	20	ENST00000473343.5_1,ENST00000513135.5_1,ENST00000485036.5_1,ENST00000480393.5_1,ENST00000377782.7_1,ENST00000356876.7_1,ENST00000351959.9_1,ENST00000414040.6_1,ENST00000351748.7_1,ENST00000348333.7_1,ENST00000502588.5_1,ENST00000502730.5_1,ENST00000510563.5_1,ENST00000453260.6_1,ENST00000475730.5_1,ENST00000469691.5_1,ENST00000481401.5_1,ENST00000461703.6_1,ENST00000453341.1_1,ENST00000515145.1_1	4,6,9,9,10,10,9,9,5,9,7,5,8,4,3,7,7,6,5,2
ENSG00000171680.21_3	chr1	6526152	6580121	-	7053	260	294	304	326	167	212	131	138	224	243	176	237	PLEKHG5	ENSG00000171680.21_3	13	ENST00000489097.5_1,ENST00000535355.5_1,ENST00000400913.5_1,ENST00000340850.9_1,ENST00000537245.5_1,ENST00000377748.5_1,ENST00000487949.4_1,ENST00000377725.5_1,ENST00000377728.7_1,ENST00000377732.5_1,ENST00000400915.7_1,ENST00000377740.4_1,ENST00000639593.1_1	19,21,21,21,22,22,9,22,21,21,22,22,2
ENSG00000162408.10_2	chr1	6581407	6614595	-	7293	1910	2025	2659	2018	2487	2181	1382	1716	3446	3853	4521	3964	NOL9	ENSG00000162408.10_2	5	ENST00000377705.5_1,ENST00000464383.1_1,ENST00000462798.1_1,ENST00000460777.1_1,ENST00000464665.1_1	12,5,2,2,2
ENSG00000253022.1	chr1	6600914	6601024	+	111	0	0	0	0	0	0	0	0	0	0	0	0	RNU6-731P	ENSG00000253022.1	1	ENST00000517213.1	1
ENSG00000229519.2_4	chr1	6607965	6608679	+	401	0	0	0	0	0	0	0	0	0	0	0	0	RP11-58A11.2	ENSG00000229519.2_4	1	ENST00000456162.2_1	2
ENSG00000173662.20_3	chr1	6615241	6639817	+	2892	15	10	4	10	14	2	0	7	6	15	2	12	TAS1R1	ENSG00000173662.20_3	4	ENST00000333172.10_1,ENST00000351136.7_1,ENST00000411823.5_1,ENST00000415267.1_1	6,5,3,4
ENSG00000204859.12_3	chr1	6640061	6649340	+	4503	238	238	468	320	305	354	144	169	285	317	358	249	ZBTB48	ENSG00000204859.12_3	8	ENST00000319084.9_1,ENST00000435905.5_1,ENST00000377674.8_1,ENST00000488936.1_1,ENST00000482360.5_1,ENST00000498342.5_1,ENST00000466813.1_1,ENST00000466941.1_1	3,3,11,7,7,3,6,2
ENSG00000162413.16_3	chr1	6650784	6674667	-	6901	247	306	281	254	214	200	146	204	292	342	267	316	KLHL21	ENSG00000162413.16_3	6	ENST00000377658.8_1,ENST00000377663.3_1,ENST00000467612.5_1,ENST00000610898.1_1,ENST00000496707.5_3,ENST00000463043.1_1	4,3,4,2,4,4
ENSG00000116273.5_2	chr1	6673745	6684093	+	3681	135	192	283	213	206	168	178	120	265	214	218	236	PHF13	ENSG00000116273.5_2	2	ENST00000377648.4_1,ENST00000495385.1_1	4,2
ENSG00000041988.15_5	chr1	6684926	6695646	+	4072	297	274	390	243	217	253	201	199	263	239	203	291	THAP3	ENSG00000041988.15_5	8	ENST00000054650.8_1,ENST00000484676.1_1,ENST00000307896.10_1,ENST00000377627.7_1,ENST00000484669.6_1,ENST00000487819.5_2,ENST00000472925.1_5,ENST00000480647.1_1	6,2,5,5,4,6,4,2
ENSG00000007923.15_2	chr1	6694228	6761984	-	5083	571	680	956	820	570	608	362	468	661	606	703	693	DNAJC11	ENSG00000007923.15_2	11	ENST00000465508.5_1,ENST00000451196.5_1,ENST00000377577.9_1,ENST00000294401.11_1,ENST00000472414.1_1,ENST00000426784.1_1,ENST00000473993.5_1,ENST00000469318.5_1,ENST00000485073.5_1,ENST00000460594.5_1,ENST00000465911.1_1	7,8,16,15,6,8,7,4,5,5,4
ENSG00000228750.6_3	chr1	6784697	6790072	+	2188	0	0	0	0	0	0	0	0	6	0	0	0	RP11-242F24.1	ENSG00000228750.6_3	5	ENST00000432429.5_1,ENST00000414210.5_1,ENST00000635029.1_1,ENST00000635092.1_1,ENST00000421469.2_1	2,2,2,3,3
ENSG00000239166.1	chr1	6812779	6812881	+	103	0	0	0	0	0	0	0	0	0	0	0	0	snoU13	ENSG00000239166.1	1	ENST00000459253.1	1
ENSG00000284744.1_2	chr1	6828014	6830098	+	987	0	0	0	0	0	0	0	0	0	0	0	0	RP11-242F24.2	ENSG00000284744.1_2	1	ENST00000641757.1_1	3
ENSG00000237436.1_4	chr1	6843952	6844903	-	415	36	20	25	27	7	24	9	16	33	22	20	16	RP11-312B8.1	ENSG00000237436.1_4	1	ENST00000442889.1_1	3
ENSG00000171735.18_3	chr1	6845384	7829766	+	10033	458	498	688	560	378	409	319	285	388	392	337	317	CAMTA1	ENSG00000171735.18_3	16	ENST00000303635.11_1,ENST00000490738.5_1,ENST00000476163.5_1,ENST00000473578.5_1,ENST00000557126.5_1,ENST00000467404.6_1,ENST00000461311.1_1,ENST00000486138.1_1,ENST00000482934.1_1,ENST00000470648.5_1,ENST00000461580.5_1,ENST00000472283.1_1,ENST00000467267.1_1,ENST00000495233.5_1,ENST00000490905.5_1,ENST00000476864.1_1	23,3,4,4,4,4,5,4,3,3,4,2,3,11,6,6
ENSG00000227950.1_4	chr1	6894393	6894678	-	286	0	0	0	0	0	0	0	0	0	0	0	0	RP11-312B8.2	ENSG00000227950.1_4	1	ENST00000433407.1_1	1
ENSG00000237365.1_4	chr1	7068436	7074339	-	349	0	0	0	0	0	0	0	0	0	0	0	0	RP11-334N17.1	ENSG00000237365.1_4	1	ENST00000456701.1_1	2
ENSG00000207056.1	chr1	7279420	7279584	+	165	0	0	0	0	0	0	0	0	0	0	0	0	RNU1-8P	ENSG00000207056.1	1	ENST00000384328.1	1
ENSG00000237402.1_4	chr1	7429003	7430331	+	365	19	2	0	1	6	0	0	1	4	0	0	0	RP3-453P22.1	ENSG00000237402.1_4	1	ENST00000427317.1_1	2
ENSG00000237728.2_4	chr1	7442548	7449814	-	743	0	0	0	0	0	0	0	0	0	0	0	0	RP3-453P22.2	ENSG00000237728.2_4	2	ENST00000618051.1_1,ENST00000411708.1_1	4,2
ENSG00000225126.1_4	chr1	7501156	7501614	-	361	0	0	0	0	0	0	0	0	0	0	0	0	RP4-549F15.1	ENSG00000225126.1_4	1	ENST00000440032.1_1	2
ENSG00000270171.1_4	chr1	7753184	7754904	-	1721	0	0	0	2	0	0	0	0	0	0	6	0	RP11-338N10.1	ENSG00000270171.1_4	1	ENST00000602640.1_1	1
ENSG00000270035.1_4	chr1	7758363	7758932	-	570	13	30	16	11	9	8	0	7	19	26	4	7	RP11-338N10.2	ENSG00000270035.1_4	1	ENST00000602973.1_1	1
ENSG00000269978.1_4	chr1	7760764	7761030	-	267	0	2	6	4	3	0	1	3	6	0	0	3	RP11-338N10.3	ENSG00000269978.1_4	1	ENST00000602916.1_1	1
ENSG00000049245.12_3	chr1	7831329	7841492	+	2760	675	572	1227	830	665	579	497	516	820	782	731	747	VAMP3	ENSG00000049245.12_3	3	ENST00000054666.10_1,ENST00000470357.1_1,ENST00000487194.1_1	5,5,2
ENSG00000269925.1_5	chr1	7836443	7836835	+	393	0	0	0	6	0	4	0	0	6	0	0	0	RP3-467L1.6	ENSG00000269925.1_5	1	ENST00000602406.1_1	1
ENSG00000049246.14_2	chr1	7844380	7905237	+	8099	113	130	176	138	86	135	79	122	246	249	319	280	PER3	ENSG00000049246.14_2	9	ENST00000377541.5_1,ENST00000613533.4_1,ENST00000614998.4_1,ENST00000377532.7_1,ENST00000361923.2_1,ENST00000473653.1_1,ENST00000602883.1_1,ENST00000463106.1_1,ENST00000494684.1_1	10,22,23,21,21,4,1,3,2
ENSG00000236266.1_4	chr1	7870302	7887402	-	830	0	0	0	0	0	0	0	0	0	0	0	0	RP3-467L1.4	ENSG00000236266.1_4	1	ENST00000451646.1_1	3
ENSG00000049247.13_2	chr1	7903143	7913572	-	1791	11	33	32	24	11	11	9	25	70	54	11	26	UTS2	ENSG00000049247.13_2	3	ENST00000377516.6_1,ENST00000361696.9_1,ENST00000054668.5_1	7,4,5
ENSG00000049249.8_3	chr1	7975954	8003225	-	6331	6	6	33	25	18	6	11	1	12	9	2	22	TNFRSF9	ENSG00000049249.8_3	4	ENST00000615230.4_1,ENST00000377507.7_1,ENST00000474475.1_3,ENST00000492571.1_1	9,8,3,5
ENSG00000270330.1_4	chr1	8002432	8002786	+	355	0	0	0	0	0	0	0	0	0	0	0	0	RP5-892F13.2	ENSG00000270330.1_4	1	ENST00000603760.1_1	1
ENSG00000116288.12_3	chr1	8014351	8045565	+	2397	199	159	245	195	149	130	117	87	161	128	185	145	PARK7	ENSG00000116288.12_3	10	ENST00000493373.5_3,ENST00000460192.5_1,ENST00000338639.9_1,ENST00000493678.5_1,ENST00000377493.9_1,ENST00000465354.5_1,ENST00000377491.5_1,ENST00000377488.5_1,ENST00000497113.1_1,ENST00000469225.1_1	7,6,7,7,6,5,7,7,5,5
ENSG00000200344.1	chr1	8042941	8043043	-	103	0	0	0	0	0	0	0	0	0	0	0	0	Y_RNA	ENSG00000200344.1	1	ENST00000363474.1	1
ENSG00000284747.1_2	chr1	8051194	8065372	+	4116	10	15	43	15	26	13	5	0	37	31	43	58	CTA-215D11.6	ENSG00000284747.1_2	2	ENST00000641354.1_1,ENST00000642135.1_1	6,2
ENSG00000284716.1_2	chr1	8058247	8059994	-	1043	0	0	0	0	0	0	0	0	0	0	0	0	CTA-215D11.5	ENSG00000284716.1_2	1	ENST00000641100.1_1	2
ENSG00000116285.12_2	chr1	8064464	8086368	-	4186	1912	2115	2621	2185	1775	1537	1399	1529	1785	1324	1569	1643	ERRFI1	ENSG00000116285.12_2	5	ENST00000474874.5_1,ENST00000377482.9_1,ENST00000467067.1_1,ENST00000469499.5_1,ENST00000487559.1_1	3,4,2,3,4
ENSG00000238290.1_4	chr1	8086798	8182762	+	2044	0	0	12	0	3	0	0	0	0	0	0	0	RP11-431K24.1	ENSG00000238290.1_4	1	ENST00000445300.1_1	3
ENSG00000232848.1_4	chr1	8117305	8118523	-	800	0	0	0	0	0	0	0	0	0	0	0	0	CTA-215D11.4	ENSG00000232848.1_4	1	ENST00000399343.2_1	2
ENSG00000229305.1_4	chr1	8249884	8252830	+	1075	0	0	0	0	0	0	0	0	0	0	0	0	RP11-431K24.2	ENSG00000229305.1_4	1	ENST00000453364.1_1	4
ENSG00000227634.2_3	chr1	8262489	8275270	+	950	0	0	0	0	0	0	0	0	0	0	0	0	RP11-431K24.3	ENSG00000227634.2_3	2	ENST00000635451.1_1,ENST00000452982.1_1	4,4
ENSG00000200975.1	chr1	8266494	8266657	-	164	0	0	0	0	0	0	0	0	0	0	0	0	RNU1-7P	ENSG00000200975.1	1	ENST00000364105.1	1
ENSG00000233645.1_4	chr1	8278250	8280589	-	477	0	0	0	0	0	0	0	0	0	0	0	0	RP11-431K24.4	ENSG00000233645.1_4	1	ENST00000424689.1_1	2
ENSG00000265414.1	chr1	8335184	8335438	-	255	0	0	0	0	0	0	0	0	0	0	0	0	RN7SL729P	ENSG00000265414.1	1	ENST00000585092.1	1
ENSG00000251977.1	chr1	8352217	8352323	-	107	0	0	0	0	0	0	0	0	0	0	0	0	RNU6-991P	ENSG00000251977.1	1	ENST00000516168.1	1
ENSG00000162426.14_3	chr1	8377886	8404227	+	2888	7	18	27	29	4	13	6	0	33	43	10	18	SLC45A1	ENSG00000162426.14_3	4	ENST00000471889.5_2,ENST00000289877.8_2,ENST00000497660.5_1,ENST00000481265.1_1	9,8,5,3
ENSG00000252254.1	chr1	8388127	8388239	+	113	0	0	0	0	0	0	0	0	0	0	0	0	Y_RNA	ENSG00000252254.1	1	ENST00000516445.1	1
ENSG00000142599.17_4	chr1	8412457	8877702	-	11503	1066	1142	1721	1184	779	788	796	625	1017	1181	1094	1068	RERE	ENSG00000142599.17_4	18	ENST00000337907.7_3,ENST00000377464.5_3,ENST00000467350.1_1,ENST00000400907.6_3,ENST00000476556.5_2,ENST00000400908.6_3,ENST00000505225.1_3,ENST00000464367.1_2,ENST00000488215.5_2,ENST00000460659.5_1,ENST00000492766.5_1,ENST00000465125.1_1,ENST00000464972.5_1,ENST00000480342.5_1,ENST00000507012.1_1,ENST00000469251.1_1,ENST00000514428.1_3,ENST00000468247.1_1	24,17,2,15,13,23,5,2,5,3,4,3,7,11,3,4,3,2
ENSG00000232912.5_4	chr1	8484705	8494898	+	702	0	0	0	0	0	3	0	0	2	1	10	3	RP5-1115A15.1	ENSG00000232912.5_4	2	ENST00000449895.5_1,ENST00000444276.1_1	4,3
ENSG00000221083.1	chr1	8571854	8571978	-	125	0	0	0	0	0	0	0	2	0	0	0	0	SNORA77	ENSG00000221083.1	1	ENST00000408156.1	1
ENSG00000270282.1_4	chr1	8572712	8573080	+	369	0	0	0	0	0	0	0	0	0	0	0	0	RP5-1115A15.2	ENSG00000270282.1_4	1	ENST00000605785.1_1	1
ENSG00000234619.1_3	chr1	8810489	8811146	+	658	0	0	0	0	0	0	0	0	0	0	0	0	RP4-633I8.1	ENSG00000234619.1_3	1	ENST00000437586.1_1	1
ENSG00000224315.2_3	chr1	8846270	8846972	-	703	2	0	0	6	0	6	0	0	0	17	0	0	RP4-633I8.2	ENSG00000224315.2_3	1	ENST00000428803.2_1	1
ENSG00000222511.1	chr1	8856633	8856731	-	99	15	7	4	3	5	4	1	8	7	9	16	8	Y_RNA	ENSG00000222511.1	1	ENST00000410579.1	1
ENSG00000226545.1_4	chr1	8858534	8859565	+	415	0	0	0	0	0	0	0	0	0	0	0	0	RP4-633I8.3	ENSG00000226545.1_4	1	ENST00000445254.1_1	2
ENSG00000228423.2_5	chr1	8865919	8867110	-	353	7	6	4	10	6	3	3	2	16	19	17	3	RP4-633I8.4	ENSG00000228423.2_5	1	ENST00000433876.2_1	2
ENSG00000229716.2_3	chr1	8891066	8891434	+	369	0	0	0	0	0	0	0	0	0	0	0	0	RP11-185B14.1	ENSG00000229716.2_3	1	ENST00000436229.2_1	1
ENSG00000074800.14_4	chr1	8921059	8939309	-	5276	26698	33550	31451	25618	28155	24336	19225	20352	33166	34793	28901	32875	ENO1	ENSG00000074800.14_4	17	ENST00000646539.1_1,ENST00000464920.2_2,ENST00000234590.9_2,ENST00000647408.1_1,ENST00000645609.1_1,ENST00000645600.1_1,ENST00000497492.1_1,ENST00000646660.1_1,ENST00000646680.1_1,ENST00000646370.1_1,ENST00000646906.1_1,ENST00000646156.1_1,ENST00000643438.1_1,ENST00000489867.2_4,ENST00000486051.5_1,ENST00000492343.2_2,ENST00000414948.1_2	12,9,12,12,10,6,7,7,6,7,7,6,6,5,4,3,2
ENSG00000230679.1_4	chr1	8938894	8939953	+	456	49	67	35	48	50	21	10	13	78	69	80	86	RP3-477M7.3	ENSG00000230679.1_4	1	ENST00000442636.1_1	2
ENSG00000201725.1	chr1	8943486	8943592	-	107	0	0	0	0	0	0	0	0	0	0	0	0	RNU6-304P	ENSG00000201725.1	1	ENST00000364855.1	1
ENSG00000238249.2_3	chr1	8953468	8954210	+	743	0	0	0	0	0	0	0	0	0	0	0	0	RP3-477M7.4	ENSG00000238249.2_3	1	ENST00000425872.1_1	1
ENSG00000232208.2_4	chr1	8967452	8967803	-	352	0	0	0	0	0	0	0	0	0	0	0	0	RP3-477M7.5	ENSG00000232208.2_4	1	ENST00000424862.2_1	1
ENSG00000232663.2_4	chr1	8969801	8969963	+	163	0	0	0	0	0	0	0	0	0	0	0	0	RP3-477M7.6	ENSG00000232663.2_4	1	ENST00000431968.2_1	1
ENSG00000131686.14_2	chr1	9005926	9035151	+	2662	0	0	0	0	0	0	0	0	0	0	0	0	CA6	ENSG00000131686.14_2	6	ENST00000549778.5_1,ENST00000476083.1_1,ENST00000480186.7_2,ENST00000377443.6_1,ENST00000377436.6_1,ENST00000377442.3_1	6,6,3,8,8,7
ENSG00000265141.1	chr1	9039637	9039933	-	297	0	0	0	0	0	0	0	0	0	0	0	0	RN7SL451P	ENSG00000265141.1	1	ENST00000583026.1	1
ENSG00000197241.3_2	chr1	9063359	9086404	-	1539	0	6	0	2	0	2	0	0	0	4	2	5	SLC2A7	ENSG00000197241.3_2	1	ENST00000400906.1_1	12
ENSG00000142583.17_3	chr1	9095166	9148537	-	6693	0	0	0	0	0	0	0	0	0	6	4	5	SLC2A5	ENSG00000142583.17_3	10	ENST00000377424.8_1,ENST00000487492.1_1,ENST00000377414.7_1,ENST00000484798.5_3,ENST00000474145.5_2,ENST00000479813.5_2,ENST00000486632.5_3,ENST00000487835.5_3,ENST00000464985.5_3,ENST00000473209.1_2	12,3,5,6,6,7,7,7,6,4
ENSG00000252404.1	chr1	9142755	9142938	+	184	0	0	0	0	0	0	0	0	0	0	0	0	SCARNA16	ENSG00000252404.1	1	ENST00000516595.1	1
ENSG00000180758.11_3	chr1	9160364	9189229	-	5372	202	256	381	308	134	146	65	150	132	135	212	196	GPR157	ENSG00000180758.11_3	3	ENST00000377411.4_1,ENST00000465853.1_2,ENST00000466131.1_1	4,2,2
ENSG00000228526.7_4	chr1	9208070	9258965	-	8702	425	674	1345	1304	538	522	343	395	1558	1804	1593	1735	MIR34AHG	ENSG00000228526.7_4	4	ENST00000635687.1_1,ENST00000635405.2_2,ENST00000437157.3_1,ENST00000632503.1_2	2,2,2,1
ENSG00000207865.1	chr1	9211727	9211836	-	110	0	0	0	0	0	0	0	0	0	0	1	0	MIR34A	ENSG00000207865.1	1	ENST00000385130.1	1
ENSG00000234546.3_3	chr1	9242063	9256343	+	1662	26	19	84	62	18	22	11	16	101	111	138	134	RP3-510D11.2	ENSG00000234546.3_3	3	ENST00000635271.1_1,ENST00000412639.2_1,ENST00000634966.1_1	3,3,2
ENSG00000049239.12_3	chr1	9294834	9331396	+	9321	1045	1363	981	1091	967	868	651	729	1235	1368	960	1234	H6PD	ENSG00000049239.12_3	3	ENST00000377403.6_2,ENST00000602477.1_2,ENST00000495451.1_1	5,5,2
ENSG00000252841.1	chr1	9338450	9338592	+	143	0	0	0	0	0	0	0	0	0	0	0	0	Z98044.1	ENSG00000252841.1	1	ENST00000517032.1	1
ENSG00000171621.13_2	chr1	9352939	9429591	+	3403	96	188	171	160	150	112	79	75	157	143	181	161	SPSB1	ENSG00000171621.13_2	4	ENST00000328089.10_1,ENST00000450402.1_1,ENST00000357898.3_1,ENST00000377399.2_1	3,2,3,2
ENSG00000284652.1_2	chr1	9481157	9482921	-	1765	0	5	0	6	0	0	0	0	3	12	0	0	CTD-2510L9.2	ENSG00000284652.1_2	1	ENST00000641006.1_1	1
ENSG00000284693.1_2	chr1	9485153	9500623	-	2623	27	20	3	18	14	18	17	16	29	44	13	6	CTD-2510L9.1	ENSG00000284693.1_2	3	ENST00000641325.1_1,ENST00000641940.1_1,ENST00000641507.1_1	2,2,2
ENSG00000252956.1	chr1	9497728	9497837	-	110	0	0	0	0	0	0	0	0	0	0	0	0	RNA5SP40	ENSG00000252956.1	1	ENST00000517147.1	1
ENSG00000235263.1_4	chr1	9561151	9563530	-	708	0	0	0	0	0	0	0	0	0	0	0	0	RP13-392I16.1	ENSG00000235263.1_4	1	ENST00000441033.1_1	2
ENSG00000171612.6_3	chr1	9599541	9645237	+	3854	51	56	127	106	47	49	30	20	88	109	94	73	SLC25A33	ENSG00000171612.6_3	1	ENST00000302692.6_1	7
ENSG00000231181.1_4	chr1	9636485	9637043	+	559	5	0	1	0	0	10	3	8	5	0	0	3	RP13-15M17.1	ENSG00000231181.1_4	1	ENST00000435277.1_1	1
ENSG00000188807.12_3	chr1	9648980	9674931	+	6966	314	532	591	417	418	390	255	265	384	454	392	479	TMEM201	ENSG00000188807.12_3	5	ENST00000340305.9_2,ENST00000340381.10_2,ENST00000416541.5_1,ENST00000510900.1_1,ENST00000508400.1_1	6,11,8,2,6
ENSG00000171608.15_2	chr1	9711790	9789172	+	6332	359	429	388	356	304	243	182	213	343	260	345	376	PIK3CD	ENSG00000171608.15_2	8	ENST00000536656.5_1,ENST00000628140.2_1,ENST00000377346.8_1,ENST00000484851.1_1,ENST00000543390.2_1,ENST00000361110.6_1,ENST00000481137.1_1,ENST00000479223.1_1	25,24,24,3,24,23,2,3
ENSG00000179840.5_4	chr1	9712668	9714644	-	1823	0	0	0	0	0	0	0	0	0	0	0	0	C1orf200	ENSG00000179840.5_4	1	ENST00000377320.3_1	2
ENSG00000233268.3_4	chr1	9720886	9722684	-	421	0	0	0	0	0	0	0	0	0	0	0	0	RP11-558F24.2	ENSG00000233268.3_4	1	ENST00000426570.3_1	2
ENSG00000231789.2_4	chr1	9732484	9747613	-	939	202	283	316	292	168	178	111	151	219	217	301	260	RP11-558F24.4	ENSG00000231789.2_4	1	ENST00000415330.2_1	3
ENSG00000171603.16_2	chr1	9789084	9884584	-	5559	2054	2501	2686	2314	1560	1545	1360	1248	1644	1673	1297	1423	CLSTN1	ENSG00000171603.16_2	5	ENST00000377298.8_1,ENST00000477264.1_1,ENST00000435891.5_1,ENST00000361311.4_1,ENST00000464286.1_1	19,4,14,18,2
ENSG00000271264.1_3	chr1	9840880	9841298	+	246	0	0	0	0	0	0	0	0	0	0	0	0	RP11-558F24.6	ENSG00000271264.1_3	1	ENST00000603781.1_1	2
ENSG00000280113.2_3	chr1	9886347	9888329	-	1983	3	0	0	0	0	0	0	0	0	0	0	0	RP11-84A14.7	ENSG00000280113.2_3	2	ENST00000639753.1_1,ENST00000623863.1_1	1,1
ENSG00000178585.14_2	chr1	9908334	9970394	-	3339	315	321	414	306	304	234	149	192	246	232	316	295	CTNNBIP1	ENSG00000178585.14_2	4	ENST00000377263.5_1,ENST00000400904.7_1,ENST00000377258.5_1,ENST00000377256.1_1	6,5,5,5
ENSG00000223989.1_4	chr1	9908376	9910212	+	424	0	0	0	0	0	0	0	0	0	0	0	0	RP11-84A14.5	ENSG00000223989.1_4	1	ENST00000454104.1_1	3
ENSG00000162441.11_2	chr1	9982171	10003465	-	2794	140	133	233	125	139	163	83	81	172	125	189	160	LZIC	ENSG00000162441.11_2	5	ENST00000488540.5_1,ENST00000377223.5_1,ENST00000400903.6_1,ENST00000377213.1_1,ENST00000471853.1_1	5,8,7,8,2
ENSG00000228150.1_5	chr1	10002981	10010032	+	440	10	15	13	15	9	7	0	2	9	10	16	6	RP11-84A14.4	ENSG00000228150.1_5	1	ENST00000445884.1_1	2
ENSG00000173614.13_3	chr1	10003486	10045559	+	4610	26	34	33	36	30	22	18	14	41	39	30	48	NMNAT1	ENSG00000173614.13_3	5	ENST00000403197.5_1,ENST00000377205.5_1,ENST00000462686.1_1,ENST00000492735.1_1,ENST00000496751.1_1	5,5,6,2,2
ENSG00000202415.1	chr1	10007376	10007694	+	319	76	150	174	110	77	96	26	37	131	117	182	177	RN7SKP269	ENSG00000202415.1	1	ENST00000365545.1	1
ENSG00000283611.2_4	chr1	10010630	10020845	-	444	0	0	0	2	0	0	0	0	0	0	0	0	RP11-84A14.6	ENSG00000283611.2_4	1	ENST00000636827.2_2	5
ENSG00000265521.1	chr1	10027439	10027516	+	78	0	0	0	0	0	0	0	0	5	9	1	2	MIR5697	ENSG00000265521.1	1	ENST00000578045.1	1
ENSG00000241326.1_5	chr1	10043199	10044626	+	436	10	5	7	4	6	0	5	0	8	12	0	9	RP11-807G9.2	ENSG00000241326.1_5	1	ENST00000413148.1_1	2
ENSG00000162444.11_2	chr1	10057264	10076078	+	861	103	89	131	150	163	134	30	95	187	124	144	124	RBP7	ENSG00000162444.11_2	2	ENST00000315901.4_1,ENST00000294435.7_1	5,4
ENSG00000225786.2	chr1	10078085	10078592	-	237	0	0	0	0	0	0	0	0	0	0	0	0	AL590639.1	ENSG00000225786.2	1	ENST00000450492.2	3
ENSG00000130939.18_3	chr1	10092890	10241297	+	9128	2479	2605	3650	2693	2117	2070	1617	1634	2236	2187	2577	2228	UBE4B	ENSG00000130939.18_3	10	ENST00000253251.12_1,ENST00000377153.5_1,ENST00000343090.10_1,ENST00000462658.1_1,ENST00000475795.5_1,ENST00000470736.1_1,ENST00000466379.1_1,ENST00000488228.1_1,ENST00000487244.5_1,ENST00000465408.1_1	27,3,28,2,9,8,6,5,4,3
ENSG00000224340.1_4	chr1	10114503	10114839	-	337	0	0	0	0	0	0	0	0	0	0	0	0	RP11-496H15.2	ENSG00000224340.1_4	1	ENST00000456484.1_1	1
ENSG00000233623.2_3	chr1	10118729	10119706	+	680	0	0	0	0	0	2	0	0	1	1	0	1	RP11-496H15.3	ENSG00000233623.2_3	1	ENST00000416729.2_1	2
ENSG00000201746.1	chr1	10223326	10223432	+	107	6	2	0	8	3	0	0	1	7	5	0	4	RNU6-828P	ENSG00000201746.1	1	ENST00000364876.1	1
ENSG00000054523.17_4	chr1	10270863	10441661	+	17720	3682	3387	3534	2488	2706	2164	2165	1805	3127	3328	3265	3075	KIF1B	ENSG00000054523.17_4	13	ENST00000377093.8_1,ENST00000263934.10_2,ENST00000377086.5_2,ENST00000377083.5_1,ENST00000377081.5_1,ENST00000620295.2_1,ENST00000622724.3_1,ENST00000495136.1_1,ENST00000497835.1_1,ENST00000465635.5_1,ENST00000483340.1_1,ENST00000635499.1_2,ENST00000470616.1_1	21,47,49,21,48,47,48,2,3,7,6,13,2
ENSG00000264881.1	chr1	10287776	10287861	+	86	0	0	0	0	0	0	0	0	0	0	0	0	MIR1273D	ENSG00000264881.1	1	ENST00000577266.1	1
ENSG00000199562.1	chr1	10359024	10359130	+	107	15	27	20	14	6	6	15	5	20	19	12	6	RNU6-37P	ENSG00000199562.1	1	ENST00000362692.1	1
ENSG00000264501.1	chr1	10366523	10366813	+	291	11	9	12	4	10	6	10	1	4	29	9	14	RN7SL731P	ENSG00000264501.1	1	ENST00000584329.1	1
ENSG00000284735.1_2	chr1	10441964	10447207	-	2380	0	0	0	0	0	0	0	0	0	0	0	0	RP4-736L20.4	ENSG00000284735.1_2	3	ENST00000641495.1_1,ENST00000641619.1_1,ENST00000641117.1_1	2,2,3
ENSG00000265945.1	chr1	10450059	10450353	+	295	0	0	0	0	0	0	0	0	0	0	0	0	RN7SL721P	ENSG00000265945.1	1	ENST00000579866.1	1
ENSG00000284642.1_2	chr1	10455473	10457489	+	1477	2	4	5	10	0	7	0	0	1	1	2	0	RP4-736L20.5	ENSG00000284642.1_2	4	ENST00000641011.1_1,ENST00000641335.1_1,ENST00000641456.1_1,ENST00000641062.1_1	2,2,2,2
ENSG00000142657.20_3	chr1	10458649	10480201	+	2966	1541	1792	1922	1838	1756	1199	1028	1220	2218	1801	2273	2298	PGD	ENSG00000142657.20_3	10	ENST00000491493.5_3,ENST00000487775.1_1,ENST00000477958.5_1,ENST00000270776.12_1,ENST00000483936.5_1,ENST00000465632.5_1,ENST00000460189.1_1,ENST00000493288.1_1,ENST00000498356.1_1,ENST00000496718.1_1	7,2,5,13,6,5,6,2,6,2
ENSG00000271989.1_4	chr1	10489938	10490734	-	797	5	18	13	11	5	8	4	0	6	8	10	16	RP4-736L20.3	ENSG00000271989.1_4	1	ENST00000607572.1_2	1
ENSG00000251503.8_5	chr1	10490159	10512210	+	2244	117	147	139	68	96	46	46	44	105	76	143	92	APITD1-CORT	ENSG00000251503.8_5	5	ENST00000400900.6_3,ENST00000470413.6_3,ENST00000602787.6_3,ENST00000602296.6_3,ENST00000465026.1_3	5,4,6,4,3
ENSG00000175279.21_3	chr1	10490500	10502866	+	1739	105	121	120	60	72	40	52	41	92	62	130	96	CENPS	ENSG00000175279.21_3	5	ENST00000309048.7_1,ENST00000602486.1_1,ENST00000477755.1_1,ENST00000462462.1_1,ENST00000464507.1_1	5,2,5,3,2
ENSG00000241563.3_3	chr1	10509776	10511959	+	1130	29	65	26	11	27	9	8	15	14	33	13	8	CORT	ENSG00000241563.3_3	1	ENST00000377049.3_1	2
ENSG00000160049.11_2	chr1	10516579	10532583	-	6622	1486	1561	2243	1760	1753	1367	1000	1115	2294	2247	1969	2119	DFFA	ENSG00000160049.11_2	3	ENST00000377038.7_1,ENST00000476658.5_1,ENST00000377036.2_1	6,5,5
ENSG00000203469.2_4	chr1	10518612	10519395	+	467	0	0	2	0	0	0	0	0	0	0	0	0	RP5-1113E3.3	ENSG00000203469.2_4	1	ENST00000424487.1_1	2
ENSG00000142655.12_2	chr1	10532345	10690815	+	2995	399	552	684	602	433	401	276	353	180	156	130	180	PEX14	ENSG00000142655.12_2	4	ENST00000472851.1_1,ENST00000356607.8_1,ENST00000491661.2_1,ENST00000492696.1_1	4,9,6,2
ENSG00000243267.2	chr1	10676893	10677170	+	278	2	0	16	11	0	0	4	2	0	4	1	0	RN7SL614P	ENSG00000243267.2	1	ENST00000461850.2	1
ENSG00000130940.14_2	chr1	10696661	10856707	-	11336	240	392	290	334	305	309	176	207	540	440	371	430	CASZ1	ENSG00000130940.14_2	9	ENST00000377022.7_1,ENST00000478524.1_1,ENST00000447850.3_1,ENST00000344008.5_1,ENST00000490176.1_1,ENST00000496432.6_1,ENST00000492173.1_1,ENST00000478728.2_1,ENST00000472814.1_1	21,2,4,16,2,9,2,3,2
ENSG00000272078.1_4	chr1	10699298	10714390	+	7923	0	0	0	0	0	0	0	0	0	0	0	0	RP4-734G22.3	ENSG00000272078.1_4	1	ENST00000606802.1_1	2
ENSG00000225158.2_3	chr1	10955818	10956055	+	238	0	0	0	0	0	0	0	0	0	0	0	0	RP11-340B24.3	ENSG00000225158.2_3	1	ENST00000450782.2_1	1
ENSG00000175262.14_4	chr1	11006528	11042094	-	3573	0	5	8	10	3	1	0	7	1	2	18	9	C1orf127	ENSG00000175262.14_4	5	ENST00000476357.1_1,ENST00000418570.6_4,ENST00000377004.8_2,ENST00000468348.1_4,ENST00000520253.1_4	2,8,13,2,12
ENSG00000215785.2_3	chr1	11051035	11051854	-	494	0	0	0	0	0	0	0	0	0	0	0	0	CFLP6	ENSG00000215785.2_3	1	ENST00000400899.2_1	2
ENSG00000264181.1	chr1	11058233	11058320	-	88	0	0	0	0	0	0	0	0	0	0	0	0	AL713997.1	ENSG00000264181.1	1	ENST00000582090.1	1
ENSG00000207213.1	chr1	11059919	11060002	-	84	0	0	2	0	0	0	0	0	0	0	0	0	Y_RNA	ENSG00000207213.1	1	ENST00000384484.1	1
ENSG00000120948.16_4	chr1	11072401	11086477	+	6071	721	794	828	697	773	610	649	477	800	1086	1020	861	TARDBP	ENSG00000120948.16_4	31	ENST00000473118.5_3,ENST00000240185.7_1,ENST00000639083.1_1,ENST00000639599.1_1,ENST00000629725.2_1,ENST00000439080.6_1,ENST00000613864.4_1,ENST00000476201.5_3,ENST00000472476.5_1,ENST00000621715.4_3,ENST00000315091.7_1,ENST00000473869.5_1,ENST00000638264.1_1,ENST00000621790.4_1,ENST00000616545.4_1,ENST00000622057.4_3,ENST00000617172.4_3,ENST00000618606.1_1,ENST00000611963.4_3,ENST00000620632.4_3…	5,6,6,8,7,5,4,6,7,5,6,7,5,6,6,5,5,2,6,5,5,5,4,5,3,2,3,2,4,2,2
ENSG00000277726.4_5	chr1	11072719	11090585	+	2205	392	376	457	351	418	288	266	224	455	521	552	463	RP4-635E18.9	ENSG00000277726.4_5	5	ENST00000614757.4_4,ENST00000611136.4_4,ENST00000612542.1_4,ENST00000622108.1_4,ENST00000620028.1_1	10,5,3,4,2
ENSG00000009724.16_2	chr1	11086580	11107290	-	4251	0	3	1	6	0	8	0	0	14	26	14	10	MASP2	ENSG00000009724.16_2	4	ENST00000400897.7_1,ENST00000478645.1_1,ENST00000480221.1_1,ENST00000400898.3_1	11,2,3,5
ENSG00000271895.2_5	chr1	11089716	11090585	+	870	28	48	64	58	26	40	24	14	106	56	74	76	RP4-635E18.8	ENSG00000271895.2_5	2	ENST00000607145.1_2,ENST00000612387.1_1	1,2
ENSG00000116649.9_3	chr1	11114641	11120081	-	1898	3763	4524	5070	3561	3783	4038	4135	3091	5872	8154	4856	5022	SRM	ENSG00000116649.9_3	6	ENST00000475189.1_1,ENST00000376957.6_1,ENST00000490101.1_3,ENST00000465788.1_3,ENST00000459997.1_1,ENST00000487300.1_1	2,8,2,3,5,3
ENSG00000171824.13_3	chr1	11126675	11159938	-	6003	3821	4216	5026	4171	3563	3219	2230	2662	4741	4347	5378	5063	EXOSC10	ENSG00000171824.13_3	11	ENST00000304457.11_2,ENST00000376936.8_2,ENST00000474216.5_1,ENST00000490565.1_1,ENST00000469634.5_1,ENST00000478271.1_1,ENST00000470611.5_1,ENST00000498576.1_1,ENST00000472078.1_1,ENST00000485606.1_1,ENST00000460196.1_1	24,25,13,3,3,4,5,2,2,3,5
ENSG00000226849.1_5	chr1	11128528	11133154	+	2682	33	32	45	31	38	26	14	13	46	16	23	41	RP4-635E18.7	ENSG00000226849.1_5	1	ENST00000452378.1_1	2
ENSG00000230337.1_4	chr1	11159732	11162157	+	536	18	26	38	42	21	45	2	22	52	33	56	25	RP4-635E18.6	ENSG00000230337.1_4	2	ENST00000447600.1_1,ENST00000435388.1_1	2,2
ENSG00000198793.12_3	chr1	11166592	11322564	-	12119	3878	5086	6104	5153	4063	3386	2456	3165	5134	4133	5488	5569	MTOR	ENSG00000198793.12_3	7	ENST00000376838.5_2,ENST00000361445.8_2,ENST00000473471.5_1,ENST00000490931.1_1,ENST00000455339.1_1,ENST00000495435.1_1,ENST00000476768.1_1	20,58,6,9,6,5,2
ENSG00000225602.5_4	chr1	11203955	11209594	+	763	0	0	0	0	0	0	0	0	0	0	0	0	RP11-99P18.1	ENSG00000225602.5_4	2	ENST00000445982.5_1,ENST00000420480.1_1	4,4
ENSG00000253086.1	chr1	11212407	11212509	+	103	0	0	0	0	0	0	0	0	0	0	0	0	RNU6-537P	ENSG00000253086.1	1	ENST00000517277.1	1
ENSG00000271794.1	chr1	11229564	11229670	-	107	0	0	0	4	0	2	3	0	11	2	0	1	snoU13	ENSG00000271794.1	1	ENST00000607349.1	1
ENSG00000171819.4_2	chr1	11249398	11256038	+	2238	0	0	0	0	0	0	0	0	0	0	0	0	ANGPTL7	ENSG00000171819.4_2	2	ENST00000376819.3_1,ENST00000476934.1_1	5,3
ENSG00000207451.1	chr1	11286311	11286417	+	107	0	0	0	0	0	0	0	0	0	0	0	0	RNU6-291P	ENSG00000207451.1	1	ENST00000384720.1	1
ENSG00000238173.1_3	chr1	11293020	11293169	+	150	0	0	0	0	0	0	0	0	0	0	0	0	RP4-647M16.1	ENSG00000238173.1_3	1	ENST00000448289.1_1	1
ENSG00000120942.13_3	chr1	11333263	11356106	+	5082	690	1108	1424	1293	836	881	558	775	1437	1362	1452	1400	UBIAD1	ENSG00000120942.13_3	4	ENST00000376810.5_1,ENST00000376804.2_2,ENST00000486588.6_2,ENST00000483738.1_2	2,2,5,3
ENSG00000238199.1_3	chr1	11338673	11339408	-	437	0	0	0	0	0	0	0	0	0	0	0	0	RP4-796F18.2	ENSG00000238199.1_3	1	ENST00000433562.1_1	2
ENSG00000284646.1_2	chr1	11371791	11379150	-	742	0	0	0	4	0	0	0	0	0	0	0	0	RP4-796F18.3	ENSG00000284646.1_2	1	ENST00000641979.1_1	4
ENSG00000224338.2_3	chr1	11485314	11485878	-	565	0	0	0	0	0	0	0	0	0	0	0	0	RP11-149P14.1	ENSG00000224338.2_3	1	ENST00000435243.2_1	1
ENSG00000204624.7_3	chr1	11539223	11597641	+	6142	45	40	73	4	19	40	5	11	69	29	32	46	DISP3	ENSG00000204624.7_3	3	ENST00000423056.2_1,ENST00000294484.6_2,ENST00000304391.6_2	2,21,5
ENSG00000235643.1_3	chr1	11669588	11673412	+	1285	11	0	0	1	2	0	0	1	17	23	27	4	RP1-69M21.2	ENSG00000235643.1_3	1	ENST00000453135.1_1	3
ENSG00000284708.1_2	chr1	11683615	11703473	+	2094	0	0	0	0	0	0	0	0	0	0	0	0	RP3-330O12.5	ENSG00000284708.1_2	1	ENST00000642131.1_1	2
ENSG00000116661.10_3	chr1	11697075	11715842	-	3416	5	41	14	23	20	29	25	8	42	75	44	61	FBXO2	ENSG00000116661.10_3	6	ENST00000642025.1_1,ENST00000354287.4_1,ENST00000471501.1_1,ENST00000466919.1_1,ENST00000465901.1_1,ENST00000475961.1_1	7,6,3,4,2,2
ENSG00000132879.13_2	chr1	11714432	11723384	+	3527	814	961	980	897	719	654	439	513	911	741	774	1066	FBXO44	ENSG00000132879.13_2	9	ENST00000251546.8_1,ENST00000425796.5_1,ENST00000376770.5_1,ENST00000376768.5_2,ENST00000251547.9_1,ENST00000376760.5_1,ENST00000376762.8_1,ENST00000475435.5_1,ENST00000471895.1_1	5,5,7,6,6,6,5,5,6
ENSG00000116663.10_2	chr1	11724181	11734411	+	1811	0	1	2	3	0	8	0	0	0	0	1	1	FBXO6	ENSG00000116663.10_2	3	ENST00000376753.8_1,ENST00000474239.1_1,ENST00000449067.1_1	6,4,4
ENSG00000116670.14_3	chr1	11734537	11751707	-	3324	5595	7334	5805	5292	6275	4900	4062	4848	7179	5740	6621	6760	MAD2L2	ENSG00000116670.14_3	9	ENST00000235310.7_1,ENST00000376692.8_1,ENST00000376672.5_1,ENST00000376669.9_1,ENST00000376667.7_1,ENST00000445656.5_1,ENST00000456915.1_3,ENST00000376664.10_1,ENST00000376655.1_1	11,9,9,9,9,6,6,6,4
ENSG00000162490.6_2	chr1	11751786	11785914	+	7346	0	0	0	3	0	6	1	0	13	21	9	14	DRAXIN	ENSG00000162490.6_2	1	ENST00000294485.5_1	7
ENSG00000177674.15_5	chr1	11796141	11814859	+	2435	623	853	623	690	642	600	431	642	933	896	883	856	AGTRAP	ENSG00000177674.15_5	14	ENST00000376637.7_1,ENST00000476512.5_1,ENST00000400895.6_1,ENST00000494437.1_1,ENST00000491346.5_1,ENST00000376629.8_5,ENST00000376627.6_3,ENST00000314340.9_5,ENST00000452018.6_1,ENST00000510878.1_1,ENST00000476309.5_1,ENST00000514733.5_1,ENST00000513739.5_1,ENST00000471765.1_1	4,6,6,2,6,5,7,5,6,4,5,4,4,4
ENSG00000215910.7_3	chr1	11821844	11849642	+	6499	43	35	29	27	29	34	35	21	65	74	51	33	C1orf167	ENSG00000215910.7_3	7	ENST00000433342.5_2,ENST00000484153.1_1,ENST00000312793.9_2,ENST00000444493.5_2,ENST00000449278.1_2,ENST00000475041.1_1,ENST00000482358.1_1	21,9,14,10,9,2,4
ENSG00000177553.6_4	chr1	11837134	11839676	-	1868	0	0	0	0	0	0	0	0	0	0	0	0	RP11-56N19.5	ENSG00000177553.6_4	1	ENST00000376620.3_1	3
ENSG00000177000.11_5	chr1	11845780	11866977	-	11978	279	484	457	380	317	308	195	244	399	483	472	437	MTHFR	ENSG00000177000.11_5	19	ENST00000376592.6_3,ENST00000376583.7_3,ENST00000376585.6_4,ENST00000376590.8_3,ENST00000641747.1_1,ENST00000641805.1_1,ENST00000641446.1_1,ENST00000641407.1_2,ENST00000641759.1_1,ENST00000641820.1_2,ENST00000641721.1_1,ENST00000376486.3_2,ENST00000641909.1_1,ENST00000641437.1_1,ENST00000418034.1_3,ENST00000423400.6_2,ENST00000431243.6_2,ENST00000642002.1_1,ENST00000413656.5_4	12,12,13,12,11,11,13,11,11,8,5,5,2,3,3,3,4,3,2
ENSG00000011021.21_3	chr1	11866153	11903201	+	6938	1439	1763	2337	1931	1324	1108	836	890	1362	1005	1467	1418	CLCN6	ENSG00000011021.21_3	8	ENST00000312413.10_1,ENST00000346436.10_1,ENST00000376497.7_1,ENST00000376496.4_1,ENST00000376490.7_1,ENST00000376491.7_1,ENST00000376492.3_1,ENST00000494028.1_1	22,23,6,22,11,11,12,4
ENSG00000242349.5_5	chr1	11901074	11908136	+	1427	114	155	199	170	109	74	86	87	159	141	259	141	NPPA-AS1	ENSG00000242349.5_5	2	ENST00000446542.5_1,ENST00000400892.2_1	4,3
ENSG00000175206.10_2	chr1	11905766	11908402	-	1120	1	0	0	0	0	0	0	0	0	0	0	0	NPPA	ENSG00000175206.10_2	3	ENST00000376480.7_1,ENST00000610706.1_1,ENST00000376476.1_1	3,4,3
ENSG00000120937.8_2	chr1	11917521	11918988	-	694	0	0	4	0	0	0	0	1	0	5	0	0	NPPB	ENSG00000120937.8_2	1	ENST00000376468.3_1	3
ENSG00000224904.1_4	chr1	11937827	11940463	+	2637	0	0	0	0	0	1	0	0	0	0	0	0	RP5-934G17.6	ENSG00000224904.1_4	1	ENST00000438808.1_1	1
ENSG00000199347.1	chr1	11968209	11968328	+	120	0	0	0	0	0	0	0	0	3	0	8	0	RNU5E-1	ENSG00000199347.1	1	ENST00000362477.1	1
ENSG00000201801.1	chr1	11969865	11969984	-	120	0	0	0	0	0	0	0	0	0	0	0	0	RNU5E-4P	ENSG00000201801.1	1	ENST00000364931.1	1
ENSG00000116685.15_2	chr1	11979648	11986485	-	3281	694	988	812	778	653	427	428	512	822	618	616	685	KIAA2013	ENSG00000116685.15_2	3	ENST00000376572.7_1,ENST00000616327.1_1,ENST00000376576.3_1	3,4,2
ENSG00000083444.16_2	chr1	11994262	12035595	+	5320	752	1021	1377	1015	999	696	689	636	646	934	752	797	PLOD1	ENSG00000083444.16_2	9	ENST00000485046.5_1,ENST00000449038.5_1,ENST00000358133.5_1,ENST00000429000.6_1,ENST00000196061.4_1,ENST00000465920.1_1,ENST00000491536.5_1,ENST00000470133.1_1,ENST00000481933.1_1	9,6,6,8,19,4,5,3,2
ENSG00000116688.16_3	chr1	12040238	12073571	+	4973	1774	2095	2286	1823	2046	1609	1539	1477	1981	2188	2312	2295	MFN2	ENSG00000116688.16_3	6	ENST00000444836.5_1,ENST00000490079.5_1,ENST00000235329.9_1,ENST00000484391.5_1,ENST00000497302.1_1,ENST00000412236.1_2	18,4,19,2,5,4
ENSG00000270914.1_4	chr1	12077273	12077365	-	93	0	0	0	0	0	0	0	0	0	0	0	0	RP5-1077B9.5	ENSG00000270914.1_4	1	ENST00000603287.1_1	1
ENSG00000116691.10_2	chr1	12079523	12092102	+	2821	394	563	725	679	654	531	307	392	921	1085	957	988	MIIP	ENSG00000116691.10_2	7	ENST00000478749.5_1,ENST00000235332.5_1,ENST00000466860.5_1,ENST00000498685.5_1,ENST00000492256.1_1,ENST00000460823.1_1,ENST00000478299.1_1	6,10,6,6,2,6,2
ENSG00000202461.1	chr1	12084069	12084181	-	113	0	0	0	0	0	0	0	0	0	0	0	0	Y_RNA	ENSG00000202461.1	1	ENST00000365591.1	1
ENSG00000243539.2	chr1	12096799	12097071	-	273	1	0	0	0	0	0	0	0	0	0	0	0	RN7SL649P	ENSG00000243539.2	1	ENST00000496974.2	1
ENSG00000120949.14_2	chr1	12123434	12204264	+	3738	4	0	12	4	17	2	6	7	9	11	10	7	TNFRSF8	ENSG00000120949.14_2	5	ENST00000417814.3_1,ENST00000263932.6_1,ENST00000514649.5_1,ENST00000413146.6_1,ENST00000479933.2_1	14,15,14,5,4
ENSG00000201135.1	chr1	12137938	12138041	-	104	0	0	0	0	0	0	0	0	0	0	0	0	RNU6-777P	ENSG00000201135.1	1	ENST00000364265.1	1
ENSG00000227875.2_3	chr1	12140350	12140604	-	255	0	0	0	0	0	0	0	0	0	0	0	0	RP11-426M1.2	ENSG00000227875.2_3	1	ENST00000439324.2_1	1
ENSG00000028137.18_3	chr1	12227060	12269285	+	3766	0	2	5	8	0	16	1	1	19	44	11	7	TNFRSF1B	ENSG00000028137.18_3	4	ENST00000536782.2_1,ENST00000376259.6_1,ENST00000492361.1_1,ENST00000489921.1_1	5,10,9,3
ENSG00000263676.1	chr1	12251770	12251830	+	61	0	0	0	0	0	0	0	0	0	0	0	0	MIR4632	ENSG00000263676.1	1	ENST00000584158.1	1
ENSG00000225196.2_3	chr1	12280851	12281166	-	316	0	6	0	0	0	0	0	0	0	0	0	0	RP5-1118D24.2	ENSG00000225196.2_3	1	ENST00000453852.2_1	1
ENSG00000252969.1	chr1	12281205	12281328	-	124	0	0	0	0	0	0	0	0	0	0	0	0	SNORA70	ENSG00000252969.1	1	ENST00000517160.1	1
ENSG00000048707.14_4	chr1	12290089	12572099	+	20764	3811	4000	4386	3838	3019	2638	2334	2390	3336	2303	3601	3153	VPS13D	ENSG00000048707.14_4	20	ENST00000620676.5_2,ENST00000613099.4_2,ENST00000476169.1_1,ENST00000489961.1_1,ENST00000011700.10_2,ENST00000646917.1_1,ENST00000460333.5_1,ENST00000487188.1_1,ENST00000643711.1_1,ENST00000469054.1_1,ENST00000646411.1_1,ENST00000543710.5_1,ENST00000645371.1_1,ENST00000466732.2_2,ENST00000476045.5_1,ENST00000481484.1_1,ENST00000543766.2_1,ENST00000645148.1_1,ENST00000647414.1_1,ENST00000473099.1_1	71,70,3,4,52,34,29,12,4,5,21,20,14,4,3,3,5,3,3,2
ENSG00000239149.1	chr1	12567300	12567451	+	152	25	20	13	0	0	0	14	0	6	0	10	1	SNORA59A	ENSG00000239149.1	1	ENST00000459326.1	1
ENSG00000229484.1_4	chr1	12587766	12588462	+	438	0	0	0	0	0	0	0	0	0	0	0	0	RP5-888M10.2	ENSG00000229484.1_4	1	ENST00000416696.1_1	2
ENSG00000162496.8_2	chr1	12627939	12677737	-	3036	284	328	321	374	332	292	139	220	175	144	204	236	DHRS3	ENSG00000162496.8_2	4	ENST00000616661.4_1,ENST00000464917.5_1,ENST00000430996.2_1,ENST00000482265.1_1	7,4,4,2
ENSG00000221340.1	chr1	12630000	12630100	-	101	4	0	0	0	0	5	0	0	0	0	4	8	RNU6ATAC18P	ENSG00000221340.1	1	ENST00000408413.1	1
ENSG00000272482.1_4	chr1	12678906	12679250	-	345	12	2	0	0	1	1	0	2	8	5	0	1	RP11-474O21.5	ENSG00000272482.1_4	1	ENST00000606790.1_1	1
ENSG00000204518.2_2	chr1	12704566	12727097	+	1575	0	0	0	0	0	0	0	0	0	0	4	0	AADACL4	ENSG00000204518.2_2	1	ENST00000376221.1_1	4
ENSG00000226166.2_4	chr1	12752925	12753036	+	112	0	0	0	0	0	0	0	0	0	0	0	0	RP11-474O21.2	ENSG00000226166.2_4	1	ENST00000436879.2_1	1
ENSG00000188984.11_2	chr1	12776118	12788726	+	4047	0	0	0	0	0	0	0	0	0	0	0	0	AADACL3	ENSG00000188984.11_2	2	ENST00000620146.2_1,ENST00000359318.7_1	5,6
ENSG00000238771.1	chr1	12799693	12799796	+	104	0	0	0	0	0	0	0	0	0	0	0	0	snoU13	ENSG00000238771.1	1	ENST00000458803.1	1
ENSG00000157330.9_2	chr1	12806163	12823847	+	4117	0	1	0	0	0	0	0	0	0	0	0	3	C1orf158	ENSG00000157330.9_2	3	ENST00000614859.4_1,ENST00000474179.1_1,ENST00000376210.3_2	8,2,3
ENSG00000116726.4_2	chr1	12834984	12838049	+	1786	0	0	0	0	0	0	0	0	0	0	0	0	PRAMEF12	ENSG00000116726.4_2	1	ENST00000357726.4_1	3
ENSG00000116721.9_2	chr1	12851546	12856777	+	2426	1	0	0	0	0	0	0	0	0	0	0	0	PRAMEF1	ENSG00000116721.9_2	2	ENST00000332296.7_1,ENST00000400814.3_1	7,3
ENSG00000228338.1_3	chr1	12882549	12883022	-	378	0	0	0	0	0	0	0	0	0	0	0	0	RP5-845O24.8	ENSG00000228338.1_3	1	ENST00000438401.1_1	2
ENSG00000204513.5	chr1	12884468	12891264	-	1839	0	0	0	0	0	0	0	0	0	2	0	0	PRAMEF11	ENSG00000204513.5	2	ENST00000535591.1,ENST00000437584.1	4,4
ENSG00000231103.2_3	chr1	12897978	12901210	-	1413	0	0	0	0	0	0	0	0	0	0	0	0	RP5-845O24.3	ENSG00000231103.2_3	1	ENST00000438176.2_1	8
ENSG00000179172.9_3	chr1	12907261	12908578	-	1108	0	0	0	0	0	0	0	0	0	0	0	0	HNRNPCL1	ENSG00000179172.9_3	1	ENST00000317869.6_1	2
ENSG00000120952.4_2	chr1	12916941	12921764	+	1642	0	0	0	0	0	0	0	0	0	0	0	0	PRAMEF2	ENSG00000120952.4_2	1	ENST00000240189.2_1	4
ENSG00000243073.3_2	chr1	12939045	12946025	-	1828	0	0	0	0	0	0	0	0	0	0	0	0	PRAMEF4	ENSG00000243073.3_2	1	ENST00000235349.5_1	4
ENSG00000187545.5_2	chr1	12952727	12958101	-	1522	0	0	0	0	0	0	0	0	0	0	0	0	PRAMEF10	ENSG00000187545.5_2	1	ENST00000235347.4_1	7
ENSG00000204510.5_2	chr1	12976430	12980302	+	1654	0	0	0	0	0	0	0	0	0	0	0	0	PRAMEF7	ENSG00000204510.5_2	2	ENST00000616979.4_1,ENST00000330881.6_1	5,4
ENSG00000207434.1	chr1	12982374	12982480	+	107	0	0	0	0	0	0	0	0	0	0	0	0	RNU6-1072P	ENSG00000207434.1	1	ENST00000384703.1	1
ENSG00000234064.1_3	chr1	12985990	12988081	+	1139	0	0	0	0	0	0	0	0	0	0	0	0	RP11-450I1.2	ENSG00000234064.1_3	1	ENST00000418187.1_1	2
ENSG00000232423.6_3	chr1	12998302	13007406	-	1784	0	0	0	0	0	0	0	0	0	0	0	0	PRAMEF6	ENSG00000232423.6_3	2	ENST00000415464.6_2,ENST00000376189.5_2	4,4
ENSG00000250894.1	chr1	13012966	13015755	-	1371	0	0	0	0	0	0	0	0	0	0	0	0	RP11-450I1.4	ENSG00000250894.1	1	ENST00000504262.1	3
ENSG00000204508.3	chr1	13035543	13038381	+	1446	0	0	0	0	0	0	0	0	0	0	0	0	PRAMEF22	ENSG00000204508.3	1	ENST00000376187.1	3
ENSG00000239810.2	chr1	13052394	13052998	-	605	0	0	0	0	0	0	0	0	0	0	0	0	WI2-3308P17.2	ENSG00000239810.2	1	ENST00000436041.1	1
ENSG00000270601.1	chr1	13108842	13112679	-	1426	0	0	0	0	0	0	0	0	0	0	0	0	PRAMEF23	ENSG00000270601.1	1	ENST00000605221.1	3
ENSG00000250113.1	chr1	13123246	13126086	-	1422	0	0	0	0	0	0	0	0	0	0	0	0	RP13-221M14.6	ENSG00000250113.1	1	ENST00000512015.1	3
ENSG00000204505.3	chr1	13140456	13145000	+	1428	0	0	0	0	0	0	0	0	0	0	0	0	PRAMEF25	ENSG00000204505.3	1	ENST00000415919.1	3
ENSG00000233336.1	chr1	13146777	13147256	+	384	0	0	0	0	0	0	0	0	0	0	0	0	RP13-221M14.2	ENSG00000233336.1	1	ENST00000437631.1	2
ENSG00000229978.1	chr1	13162645	13165443	-	1452	0	0	0	0	0	0	0	0	0	0	0	0	RP13-221M14.3	ENSG00000229978.1	2	ENST00000448180.1,ENST00000434606.1	3,2
ENSG00000236179.1_3	chr1	13171871	13173157	-	891	0	0	0	0	0	0	0	0	0	0	0	0	RP13-221M14.4	ENSG00000236179.1_3	1	ENST00000458709.1_1	2
ENSG00000275774.2_2	chr1	13182968	13184326	-	1148	0	0	0	0	0	0	0	0	0	0	0	0	HNRNPCL2	ENSG00000275774.2_2	1	ENST00000621994.2_1	2
ENSG00000179412.10_3	chr1	13182991	13183872	-	577	0	0	0	0	0	0	0	0	0	0	0	0	HNRNPCL4	ENSG00000179412.10_3	1	ENST00000323770.7_1	4
ENSG00000224199.1	chr1	13196270	13199067	+	1452	0	0	0	0	0	0	0	0	0	0	0	0	WI2-2994D6.1	ENSG00000224199.1	1	ENST00000457244.1	3
ENSG00000229571.2	chr1	13216356	13219581	-	1476	0	0	0	0	0	0	0	0	0	3	0	0	PRAMEF26	ENSG00000229571.2	1	ENST00000423177.1	2
ENSG00000204503.5	chr1	13328196	13331692	-	2104	0	0	0	0	0	0	0	0	0	0	0	0	PRAMEF3	ENSG00000204503.5	2	ENST00000353410.5,ENST00000376173.3	3,3
ENSG00000233394.1	chr1	13351482	13354323	+	1422	0	0	0	0	0	0	0	0	0	0	0	0	RP11-248D7.2	ENSG00000233394.1	1	ENST00000453094.1	3
ENSG00000204502.2	chr1	13359819	13369057	+	1855	0	0	0	0	0	0	0	0	0	0	0	0	PRAMEF5	ENSG00000204502.2	1	ENST00000376168.1	4
ENSG00000231219.1_3	chr1	13379149	13381237	-	1068	0	0	0	0	0	0	0	0	0	0	0	0	RP11-219C24.8	ENSG00000231219.1_3	1	ENST00000431596.1_1	2
ENSG00000207511.1	chr1	13384735	13384841	-	107	0	0	0	0	0	0	0	0	0	0	0	0	RNU6-771P	ENSG00000207511.1	1	ENST00000384780.1	1
ENSG00000182330.6	chr1	13386646	13390765	-	1844	0	0	0	0	0	0	0	0	0	0	0	0	PRAMEF8	ENSG00000182330.6	1	ENST00000357367.2	4
ENSG00000237700.1	chr1	13411551	13414482	+	1425	0	0	0	0	0	0	0	0	0	0	0	0	RP11-219C24.6	ENSG00000237700.1	1	ENST00000437300.1	3
ENSG00000204501.2	chr1	13421176	13428191	+	1863	0	0	0	0	0	0	0	0	0	0	0	0	PRAMEF9	ENSG00000204501.2	1	ENST00000376152.1	4
ENSG00000228229.2	chr1	13429634	13430113	+	384	0	0	0	0	0	0	0	0	0	0	0	0	RP11-219C24.10	ENSG00000228229.2	1	ENST00000432559.2	2
ENSG00000279169.2_3	chr1	13447556	13452656	-	2034	0	0	0	0	0	0	0	0	0	0	0	0	PRAMEF13	ENSG00000279169.2_3	2	ENST00000638454.1_2,ENST00000625019.2_3	6,8
ENSG00000274178.2_3	chr1	13448050	13450861	-	1417	0	0	0	0	0	0	0	0	0	0	0	0	CH17-409J4.2	ENSG00000274178.2_3	1	ENST00000610289.2_1	11
ENSG00000204491.2	chr1	13474689	13477522	-	1440	0	0	0	0	0	0	0	0	0	0	0	0	PRAMEF18	ENSG00000204491.2	1	ENST00000376126.2	3
ENSG00000204488.3	chr1	13495254	13498260	+	1587	0	0	0	0	0	0	0	0	0	0	0	0	PRAMEF16	ENSG00000204488.3	1	ENST00000376121.3	3
ENSG00000204486.3	chr1	13516066	13526943	+	1597	0	0	0	0	0	0	0	0	0	0	0	0	PRAMEF21	ENSG00000204486.3	2	ENST00000332192.6,ENST00000327795.5	4,3
ENSG00000204485.2	chr1	13607431	13611550	-	1844	0	0	0	0	0	0	0	0	0	0	0	0	XX-FW84067D5.1	ENSG00000204485.2	2	ENST00000359310.2,ENST00000457228.1	4,3
ENSG00000224581.1	chr1	13632348	13635279	+	1425	0	0	0	0	0	0	0	0	0	0	0	0	XX-FW84067D5.2	ENSG00000224581.1	1	ENST00000447851.1	3
ENSG00000157358.7	chr1	13641973	13648988	+	1863	0	0	0	0	0	0	0	0	0	0	0	0	PRAMEF15	ENSG00000157358.7	1	ENST00000330087.5	4
ENSG00000204481.7_2	chr1	13668411	13673511	-	2301	0	0	0	0	0	0	0	0	0	0	0	0	PRAMEF14	ENSG00000204481.7_2	2	ENST00000602491.1_1,ENST00000334600.6_1	2,4
ENSG00000204480.7_2	chr1	13695525	13698151	-	1233	0	0	0	0	0	0	0	0	0	0	0	0	PRAMEF19	ENSG00000204480.7_2	1	ENST00000376101.2_1	3
ENSG00000204479.4_2	chr1	13716092	13719089	+	1578	0	0	0	0	0	0	0	0	0	0	0	0	PRAMEF17	ENSG00000204479.4_2	1	ENST00000376098.4_1	3
ENSG00000204478.9_2	chr1	13736907	13747803	+	1597	0	0	0	0	0	0	0	0	0	0	0	0	PRAMEF20	ENSG00000204478.9_2	2	ENST00000316412.9_1,ENST00000602960.1_1	4,3
ENSG00000162494.5_2	chr1	13801445	13840543	-	2209	0	0	0	2	0	0	0	0	5	11	0	0	LRRC38	ENSG00000162494.5_2	1	ENST00000376085.3_1	2
ENSG00000259961.1_4	chr1	13839715	13842765	+	477	0	0	0	0	0	0	0	0	0	0	0	0	RP4-597A16.2	ENSG00000259961.1_4	1	ENST00000563570.1_1	3
ENSG00000215909.3_3	chr1	13881496	13882189	+	371	0	0	0	0	0	0	0	0	0	0	0	0	RP4-597A16.3	ENSG00000215909.3_3	1	ENST00000401091.2_1	2
ENSG00000162493.16_4	chr1	13909960	13944452	+	3707	260	294	501	335	297	348	265	124	367	346	363	262	PDPN	ENSG00000162493.16_4	12	ENST00000294489.10_1,ENST00000617617.4_1,ENST00000376057.8_1,ENST00000621990.4_2,ENST00000506205.1_3,ENST00000510906.5_1,ENST00000509009.5_2,ENST00000376061.8_1,ENST00000513143.5_1,ENST00000487038.5_1,ENST00000475043.5_1,ENST00000488631.1_1	6,6,6,6,3,5,6,6,7,6,6,5
ENSG00000222952.1	chr1	13949679	13949779	-	101	0	0	0	0	0	0	0	0	0	0	0	0	RNA5SP41	ENSG00000222952.1	1	ENST00000411020.1	1
ENSG00000266358.1	chr1	13950397	13950497	-	101	0	0	0	0	0	0	0	0	0	0	0	0	AL359771.1	ENSG00000266358.1	1	ENST00000577470.1	1
ENSG00000237445.2_4	chr1	13983806	13986405	-	379	0	0	0	0	0	0	0	0	0	0	0	0	CTA-520D8.2	ENSG00000237445.2_4	1	ENST00000441809.2_1	2
ENSG00000253085.1	chr1	14022565	14022694	-	130	0	0	0	0	0	0	0	0	0	0	0	0	SCARNA11	ENSG00000253085.1	1	ENST00000517276.1	1
ENSG00000116731.22_3	chr1	14026693	14151574	+	10923	1629	1683	2464	2180	1401	1186	1099	992	1889	1721	2073	2120	PRDM2	ENSG00000116731.22_3	14	ENST00000484063.6_1,ENST00000376048.9_1,ENST00000311066.9_1,ENST00000235372.11_1,ENST00000491134.5_1,ENST00000502727.5_1,ENST00000502724.5_1,ENST00000413440.5_1,ENST00000343137.8_1,ENST00000491815.1_1,ENST00000503842.5_1,ENST00000407521.7_1,ENST00000505823.5_1,ENST00000487453.1_2	6,8,9,10,6,4,5,4,5,2,5,4,4,3
ENSG00000189337.16_4	chr1	14219287	15444539	+	13841	587	643	1211	959	349	358	231	337	152	148	122	184	KAZN	ENSG00000189337.16_4	9	ENST00000636564.1_1,ENST00000636203.1_2,ENST00000491547.1_1,ENST00000376030.6_2,ENST00000503743.5_1,ENST00000361144.9_1,ENST00000376028.8_1,ENST00000400798.6_1,ENST00000400797.3_1	3,17,7,15,9,8,5,8,8
ENSG00000252151.1	chr1	14450728	14450830	-	103	0	0	0	0	0	0	0	0	0	0	0	0	RNU6-1265P	ENSG00000252151.1	1	ENST00000516342.1	1
ENSG00000231606.1_4	chr1	14548386	14549613	-	282	0	0	0	0	0	0	0	0	0	0	0	0	RP11-344F13.1	ENSG00000231606.1_4	1	ENST00000449215.1_1	2
ENSG00000234593.2_4	chr1	14675450	14718071	-	764	0	0	0	0	0	0	0	0	0	0	0	0	RP4-704D23.1	ENSG00000234593.2_4	1	ENST00000447908.2_1	4
ENSG00000235829.1_3	chr1	15018625	15019109	-	326	0	0	0	0	0	0	0	0	0	0	0	0	RP3-410I8.1	ENSG00000235829.1_3	1	ENST00000416175.1_1	2
ENSG00000175147.11_4	chr1	15438311	15478960	-	7100	51	42	37	47	27	4	6	15	41	15	12	17	TMEM51-AS1	ENSG00000175147.11_4	2	ENST00000310916.6_1,ENST00000404665.3_1	6,5
ENSG00000171729.13_2	chr1	15479028	15546976	+	2240	68	164	190	130	161	87	85	50	152	185	109	203	TMEM51	ENSG00000171729.13_2	6	ENST00000428417.5_1,ENST00000376014.7_1,ENST00000451326.6_1,ENST00000400796.7_1,ENST00000434578.6_2,ENST00000376008.2_1	3,4,3,3,4,4
ENSG00000204464.7_2	chr1	15490840	15497813	-	559	0	2	0	0	0	0	0	0	0	0	0	0	C1orf195	ENSG00000204464.7_2	2	ENST00000424792.5_1,ENST00000625027.2_1	2,2
ENSG00000215720.4_4	chr1	15518324	15519341	-	710	0	0	0	0	0	0	0	0	0	0	0	0	RP1-21O18.3	ENSG00000215720.4_4	1	ENST00000400795.3_1	2
ENSG00000278480.1_4	chr1	15552869	15554045	+	966	0	0	0	0	0	0	0	7	0	7	0	0	RP5-903E17.2	ENSG00000278480.1_4	1	ENST00000612442.1_1	2
ENSG00000142621.19_3	chr1	15573768	15726779	+	12805	163	191	294	289	161	120	125	140	278	242	214	231	FHAD1	ENSG00000142621.19_3	22	ENST00000358897.8_1,ENST00000433640.6_1,ENST00000375998.8_1,ENST00000462113.1_1,ENST00000375996.6_1,ENST00000375997.8_1,ENST00000524761.5_1,ENST00000375995.3_2,ENST00000483694.1_1,ENST00000459961.1_1,ENST00000472131.5_1,ENST00000471347.5_1,ENST00000444385.5_2,ENST00000529606.5_2,ENST00000314668.13_2,ENST00000532408.1_1,ENST00000483120.1_1,ENST00000481324.5_1,ENST00000477846.5_1,ENST00000495195.5_…	31,4,30,2,9,8,4,6,4,2,3,24,16,16,14,4,4,14,9,4,4,3
ENSG00000233485.1_5	chr1	15653176	15670372	-	3105	0	0	0	0	0	0	0	0	0	0	0	0	RP3-467K16.2	ENSG00000233485.1_5	1	ENST00000428747.1_1	2
ENSG00000236045.1_5	chr1	15660662	15661960	-	727	0	0	0	0	0	0	0	0	0	0	0	0	RP3-467K16.7	ENSG00000236045.1_5	1	ENST00000439788.1_1	2
ENSG00000228140.1_4	chr1	15729475	15735929	-	5178	0	0	9	3	2	2	1	2	5	14	4	13	RP3-467K16.4	ENSG00000228140.1_4	1	ENST00000427824.1_1	3
ENSG00000142634.12_2	chr1	15736391	15756839	+	2531	344	403	490	357	294	212	202	246	338	499	410	393	EFHD2	ENSG00000142634.12_2	2	ENST00000375980.8_1,ENST00000445566.1_1	4,5
ENSG00000162438.11_2	chr1	15764935	15775737	+	3486	4	0	0	0	0	0	0	0	0	0	0	0	CTRC	ENSG00000162438.11_2	4	ENST00000375949.4_1,ENST00000375943.6_1,ENST00000476813.5_1,ENST00000483406.1_1	8,5,3,6
ENSG00000142615.7_3	chr1	15783223	15798586	+	1519	0	0	0	4	0	0	0	0	0	0	0	6	CELA2A	ENSG00000142615.7_3	3	ENST00000459653.1_1,ENST00000359621.4_1,ENST00000497590.1_1	4,8,2
ENSG00000215704.9_3	chr1	15792404	15817895	+	1457	1	0	4	4	0	0	0	0	0	0	0	6	CELA2B	ENSG00000215704.9_3	4	ENST00000494280.1_1,ENST00000375910.7_1,ENST00000422901.1_3,ENST00000488764.1_1	6,8,4,3
ENSG00000132906.17_3	chr1	15817327	15853029	-	5269	191	211	228	242	134	138	123	90	339	362	353	271	CASP9	ENSG00000132906.17_3	11	ENST00000546424.5_1,ENST00000333868.9_1,ENST00000348549.9_1,ENST00000400777.7_1,ENST00000424908.5_1,ENST00000375890.8_1,ENST00000474305.2_1,ENST00000447522.5_2,ENST00000440484.1_2,ENST00000546969.1_1,ENST00000469637.1_1	8,9,5,9,5,9,9,7,5,3,3
ENSG00000116138.12_2	chr1	15853308	15918874	+	8563	476	680	990	922	442	440	327	266	690	716	734	739	DNAJC16	ENSG00000116138.12_2	10	ENST00000375838.5_1,ENST00000616884.4_1,ENST00000375847.7_1,ENST00000475133.5_1,ENST00000375849.5_1,ENST00000483270.1_1,ENST00000472665.1_1,ENST00000479655.1_1,ENST00000490811.1_1,ENST00000495523.1_1	13,14,15,15,15,14,5,2,2,2
ENSG00000251866.1	chr1	15868660	15868799	+	140	0	0	6	1	0	0	0	1	7	0	2	0	SCARNA21	ENSG00000251866.1	1	ENST00000516057.1	1
ENSG00000272510.1_4	chr1	15892106	15892451	-	346	0	0	0	0	0	0	0	0	0	0	7	0	RP4-680D5.8	ENSG00000272510.1_4	1	ENST00000606186.1_1	1
ENSG00000116771.5_2	chr1	15898848	15911605	-	2500	0	12	7	1	4	0	0	4	1	0	7	9	AGMAT	ENSG00000116771.5_2	1	ENST00000375826.3_1	7
ENSG00000237301.1_4	chr1	15912631	15930121	-	2845	0	5	2	0	12	0	0	0	12	7	6	10	RP4-680D5.2	ENSG00000237301.1_4	1	ENST00000428945.1_1	2
ENSG00000235084.3_3	chr1	15931092	15931538	+	447	1	4	7	5	1	2	2	7	2	1	4	14	RP4-680D5.3	ENSG00000235084.3_3	1	ENST00000454346.1_1	1
ENSG00000252417.1	chr1	15934573	15934640	-	68	0	0	0	0	0	0	0	0	0	0	0	0	RNU7-179P	ENSG00000252417.1	1	ENST00000516608.1	1
ENSG00000236500.1_3	chr1	15941138	15941362	-	225	2	3	6	0	0	0	0	0	0	0	0	1	RP4-680D5.4	ENSG00000236500.1_3	1	ENST00000422383.1_1	1
ENSG00000197312.11_3	chr1	15943995	15995539	+	12136	1284	1339	1532	1020	1060	942	945	743	1647	1689	1252	1231	DDI2	ENSG00000197312.11_3	6	ENST00000480945.5_1,ENST00000486680.1_1,ENST00000546927.1_1,ENST00000320153.10_1,ENST00000483899.1_1,ENST00000548451.1_1	10,4,2,8,4,2
ENSG00000215695.1_3	chr1	15986364	15988217	+	1854	625	637	690	479	557	490	427	295	779	859	570	550	RSC1A1	ENSG00000215695.1_3	1	ENST00000345034.1_1	1
ENSG00000271742.1_4	chr1	16009368	16009623	-	256	5	2	0	2	0	5	0	0	0	0	1	0	RP4-680D5.9	ENSG00000271742.1_4	1	ENST00000606262.1_1	1
ENSG00000116786.12_4	chr1	16010827	16061264	+	4122	1792	2477	2481	2196	1831	1714	1119	1302	2095	1773	1860	1986	PLEKHM2	ENSG00000116786.12_4	5	ENST00000375799.7_1,ENST00000375793.2_1,ENST00000462455.1_1,ENST00000642363.1_1,ENST00000477849.1_1	20,19,5,21,7
ENSG00000264048.1	chr1	16010967	16011053	+	87	0	0	0	0	0	0	0	0	0	0	0	0	AL121992.1	ENSG00000264048.1	1	ENST00000584345.1	1
ENSG00000237938.5_4	chr1	16046807	16063391	-	1533	0	0	0	0	0	0	0	0	0	0	0	0	RP11-288I21.1	ENSG00000237938.5_4	3	ENST00000623689.3_2,ENST00000615472.1_2,ENST00000453804.1_1	4,4,4
ENSG00000162461.7_2	chr1	16062900	16067891	+	3195	0	5	15	6	0	0	0	0	5	12	0	2	SLC25A34	ENSG00000162461.7_2	3	ENST00000294454.5_1,ENST00000489568.1_1,ENST00000465495.1_1	5,4,2
ENSG00000224459.1_4	chr1	16066546	16076391	-	639	0	0	0	4	0	0	0	0	0	0	0	0	RP11-169K16.4	ENSG00000224459.1_4	1	ENST00000418525.1_1	2
ENSG00000162460.6_2	chr1	16068917	16074477	+	1520	0	0	0	0	0	0	0	0	0	0	0	0	TMEM82	ENSG00000162460.6_2	2	ENST00000375782.1_1,ENST00000465575.1_1	6,3
ENSG00000162458.12_4	chr1	16083102	16113089	+	4716	480	593	467	437	485	427	351	353	580	704	610	645	FBLIM1	ENSG00000162458.12_4	15	ENST00000496928.6_1,ENST00000508310.5_1,ENST00000510393.5_1,ENST00000430076.5_1,ENST00000375771.5_3,ENST00000510929.5_1,ENST00000502638.5_1,ENST00000375766.7_3,ENST00000483633.6_1,ENST00000502739.5_1,ENST00000431771.6_1,ENST00000441801.6_1,ENST00000332305.5_3,ENST00000514156.1_1,ENST00000509138.1_1	4,4,4,4,10,4,4,9,4,5,4,6,5,3,2
ENSG00000224321.1_3	chr1	16119291	16119780	+	490	0	3	0	2	2	0	1	0	2	0	5	2	RP11-169K16.6	ENSG00000224321.1_3	1	ENST00000431782.1_1	1
ENSG00000233954.6_2	chr1	16133664	16135843	-	2180	30	39	19	43	21	14	15	12	22	22	17	32	UQCRHL	ENSG00000233954.6_2	1	ENST00000483273.2_1	1
ENSG00000178715.8_4	chr1	16154727	16155164	+	438	3	3	1	1	6	2	2	3	2	5	4	2	RP11-169K16.8	ENSG00000178715.8_4	1	ENST00000321418.6_1	1
ENSG00000179743.4_4	chr1	16160969	16174642	-	2473	67	79	60	50	79	36	40	40	40	45	54	44	RP11-169K16.9	ENSG00000179743.4_4	1	ENST00000317122.2_1	2
ENSG00000065526.10_2	chr1	16174359	16266955	+	13294	7958	9010	11509	8354	7239	6650	6970	5432	8714	8455	7369	8862	SPEN	ENSG00000065526.10_2	5	ENST00000375759.7_1,ENST00000471538.1_1,ENST00000438066.1_1,ENST00000442985.1_1,ENST00000487496.1_1	15,2,4,7,2
ENSG00000238818.1	chr1	16237392	16237492	+	101	0	0	0	0	0	0	0	0	1	0	0	0	snoU13	ENSG00000238818.1	1	ENST00000459258.1	1
ENSG00000270620.1_4	chr1	16244193	16244403	-	211	0	0	0	0	0	0	0	0	0	0	0	0	RP1-134O19.3	ENSG00000270620.1_4	1	ENST00000604816.1_1	1
ENSG00000116809.11_2	chr1	16268364	16302627	-	4240	345	414	462	418	257	288	151	251	291	324	393	425	ZBTB17	ENSG00000116809.11_2	16	ENST00000462525.1_1,ENST00000440560.5_1,ENST00000375743.8_1,ENST00000537142.5_1,ENST00000375733.6_1,ENST00000444358.1_1,ENST00000488008.1_1,ENST00000471805.5_1,ENST00000472658.1_1,ENST00000474511.1_1,ENST00000487785.1_1,ENST00000492834.1_1,ENST00000490899.1_1,ENST00000464719.1_1,ENST00000479282.5_1,ENST00000494020.1_1	2,4,16,15,16,6,2,4,2,3,2,4,4,4,5,4
ENSG00000234607.2_4	chr1	16296127	16296689	+	563	0	0	0	0	0	0	0	1	9	0	0	0	RP11-5P18.1	ENSG00000234607.2_4	1	ENST00000416882.2_1	1
ENSG00000231353.1_4	chr1	16314677	16314936	+	260	0	0	0	0	0	0	0	0	0	0	0	0	RP11-5P18.3	ENSG00000231353.1_4	1	ENST00000424379.1_1	1
ENSG00000275503.1_4	chr1	16315635	16315870	-	236	0	0	0	0	0	0	0	0	0	0	0	0	RP11-5P18.11	ENSG00000275503.1_4	1	ENST00000613591.1_1	1
ENSG00000224966.4_3	chr1	16316366	16321246	+	962	0	0	0	0	0	0	0	0	0	0	0	0	RP11-5P18.2	ENSG00000224966.4_3	1	ENST00000505954.1_1	8
ENSG00000183888.4_2	chr1	16330731	16335302	+	3039	0	0	0	0	0	0	0	0	0	0	0	0	C1orf64	ENSG00000183888.4_2	1	ENST00000329454.2_1	2
ENSG00000233078.1_4	chr1	16332655	16333166	-	466	0	0	0	0	0	0	0	0	0	0	0	0	RP11-5P18.5	ENSG00000233078.1_4	1	ENST00000437156.1_1	2
ENSG00000173641.17_5	chr1	16340523	16346089	-	3910	0	0	0	0	0	1	0	0	3	0	0	3	HSPB7	ENSG00000173641.17_5	7	ENST00000411503.5_4,ENST00000442459.2_1,ENST00000311890.13_2,ENST00000375718.4_1,ENST00000463576.5_1,ENST00000487046.1_2,ENST00000406363.2_2	3,2,3,4,3,3,3
ENSG00000186510.11_2	chr1	16345370	16360545	+	3476	12	21	23	44	7	3	12	3	6	8	42	13	CLCNKA	ENSG00000186510.11_2	7	ENST00000464764.5_1,ENST00000477360.2_1,ENST00000375692.5_1,ENST00000495784.1_1,ENST00000439316.6_1,ENST00000331433.4_1,ENST00000491433.1_1	24,3,21,6,19,20,8
ENSG00000232456.1_4	chr1	16361673	16366524	-	704	0	8	0	0	0	5	0	2	0	2	2	0	RP11-5P18.10	ENSG00000232456.1_4	1	ENST00000447882.1_1	5
ENSG00000184908.17_2	chr1	16370231	16383803	+	2939	128	200	144	247	75	51	48	71	110	101	137	139	CLCNKB	ENSG00000184908.17_2	4	ENST00000619181.4_1,ENST00000375679.8_1,ENST00000375667.7_1,ENST00000431772.1_1	14,20,13,5
ENSG00000185519.8_2	chr1	16384264	16400127	-	1701	54	71	58	58	100	82	52	77	164	159	72	111	FAM131C	ENSG00000185519.8_2	2	ENST00000375662.4_1,ENST00000494078.1_1	7,6
ENSG00000142627.12_2	chr1	16450832	16482582	-	4159	437	617	587	471	586	443	387	408	1236	1228	975	969	EPHA2	ENSG00000142627.12_2	4	ENST00000358432.7_1,ENST00000462805.1_1,ENST00000480202.1_1,ENST00000461614.1_1	17,2,6,2
ENSG00000227959.1_4	chr1	16481706	16483824	+	904	0	7	8	1	20	15	0	2	18	1	17	19	RP11-276H7.2	ENSG00000227959.1_4	1	ENST00000424774.1_1	2
ENSG00000224621.1_4	chr1	16485761	16488378	+	544	0	0	0	3	13	0	0	0	0	0	4	3	RP11-276H7.3	ENSG00000224621.1_4	1	ENST00000426353.1_1	2
ENSG00000234166.1_4	chr1	16524349	16524852	+	439	0	0	0	0	0	0	0	0	0	0	0	0	RP4-733M16.2	ENSG00000234166.1_4	1	ENST00000457809.1_1	2
ENSG00000142632.16_3	chr1	16524349	16539104	-	3745	11	27	16	11	19	17	2	28	15	42	36	10	ARHGEF19	ENSG00000142632.16_3	6	ENST00000478117.5_1,ENST00000270747.7_1,ENST00000449495.1_1,ENST00000478210.1_1,ENST00000471928.1_1,ENST00000441785.1_2	11,16,6,5,3,2
ENSG00000237276.8_3	chr1	16542404	16554522	-	1990	21	26	11	35	5	16	0	17	31	13	31	21	ANO7P1	ENSG00000237276.8_3	3	ENST00000442385.5_1,ENST00000475369.1_1,ENST00000602586.1_1	3,2,17
ENSG00000204377.3	chr1	16555368	16556038	-	252	7	0	5	2	1	0	0	2	8	11	5	6	C1orf134	ENSG00000204377.3	1	ENST00000375605.2	2
ENSG00000132881.11_2	chr1	16558195	16563657	-	1545	15	42	10	7	19	22	4	9	31	46	34	39	RSG1	ENSG00000132881.11_2	2	ENST00000375599.7_1,ENST00000434014.1_1	5,4
ENSG00000233929.1_3	chr1	16567708	16567893	-	186	0	6	9	2	0	0	1	0	0	19	0	6	MTL1	ENSG00000233929.1_3	1	ENST00000421314.1_1	1
ENSG00000037637.10_3	chr1	16573334	16678949	-	8984	1543	1751	1669	1818	1366	1235	799	895	1685	1303	1582	1452	FBXO42	ENSG00000037637.10_3	4	ENST00000375592.7_1,ENST00000456164.5_2,ENST00000444116.1_2,ENST00000478089.1_1	10,3,4,3
ENSG00000055070.16_2	chr1	16679070	16724640	+	4747	3296	3657	2999	2868	3330	2612	1768	2365	4179	3125	3584	3730	SZRD1	ENSG00000055070.16_2	10	ENST00000475078.1_1,ENST00000401088.8_1,ENST00000471507.5_1,ENST00000401089.3_1,ENST00000486763.5_1,ENST00000476423.5_1,ENST00000475554.5_1,ENST00000472351.5_1,ENST00000492354.1_1,ENST00000472461.1_1	3,4,4,3,5,4,5,5,3,4
ENSG00000226457.1_4	chr1	16695645	16696025	-	381	0	0	0	0	0	0	0	0	0	0	0	0	RP11-430L17.1	ENSG00000226457.1_4	1	ENST00000445689.1_1	1
ENSG00000187144.11_2	chr1	16713612	16763919	-	4506	1	0	12	0	0	3	0	5	0	2	1	0	SPATA21	ENSG00000187144.11_2	6	ENST00000491418.5_1,ENST00000466212.5_1,ENST00000335496.5_1,ENST00000540400.1_1,ENST00000375577.5_1,ENST00000612240.1_1	5,17,13,11,5,4
ENSG00000157191.19_2	chr1	16767167	16786573	+	5559	151	254	212	222	172	203	124	142	254	233	179	177	NECAP2	ENSG00000157191.19_2	12	ENST00000337132.9_1,ENST00000504551.6_1,ENST00000457722.6_1,ENST00000486390.1_1,ENST00000443980.6_1,ENST00000504858.5_1,ENST00000508680.5_1,ENST00000492095.5_1,ENST00000459640.5_1,ENST00000496239.5_1,ENST00000513161.1_1,ENST00000509727.1_1	8,6,8,2,7,6,5,9,9,7,6,2
ENSG00000226029.1_3	chr1	16787443	16794976	+	3245	0	5	6	11	1	8	1	2	18	8	7	15	RP4-798A10.2	ENSG00000226029.1_3	1	ENST00000457898.1_1	2
ENSG00000080947.14_2	chr1	16793931	16825752	-	6813	138	190	287	243	166	135	156	123	181	259	281	173	CROCCP3	ENSG00000080947.14_2	6	ENST00000263511.8_1,ENST00000591348.5_1,ENST00000420820.6_1,ENST00000591316.1_1,ENST00000590118.5_1,ENST00000589964.1_1	15,12,14,2,4,3
ENSG00000206652.1	chr1	16840617	16840780	-	164	0	2	35	16	8	8	4	0	12	0	19	19	RNU1-1	ENSG00000206652.1	1	ENST00000383925.1	1
ENSG00000261135.1_4	chr1	16841140	16842249	+	1110	113	183	125	107	102	74	58	58	108	120	84	101	RP4-798A10.7	ENSG00000261135.1_4	1	ENST00000562878.1_1	1
ENSG00000224174.2_4	chr1	16847189	16848291	+	327	0	0	0	0	0	0	0	1	3	0	0	0	RP4-798A10.4	ENSG00000224174.2_4	1	ENST00000452795.2_1	2
ENSG00000233421.4_3	chr1	16860381	16862667	-	2068	10	9	15	7	9	9	10	13	11	14	6	14	RP5-875O13.1	ENSG00000233421.4_3	2	ENST00000415386.2_1,ENST00000614408.1_1	2,2
ENSG00000268674.1	chr1	16865561	16866070	+	510	0	0	0	0	0	0	0	0	0	0	0	0	AL355149.2	ENSG00000268674.1	1	ENST00000601199.1	1
ENSG00000225710.1_4	chr1	16875146	16879026	-	882	0	0	0	0	0	0	0	0	0	0	0	0	RP5-875O13.6	ENSG00000225710.1_4	1	ENST00000438396.1_1	3
ENSG00000266584.1	chr1	16875409	16875482	+	74	0	0	0	0	0	0	0	0	0	0	0	0	AL355149.1	ENSG00000266584.1	1	ENST00000577341.1	1
ENSG00000219481.10_3	chr1	16888814	16940057	-	12212	3235	2862	3439	2504	2099	1940	1633	1578	3094	2780	3548	3161	NBPF1	ENSG00000219481.10_3	7	ENST00000430580.6_2,ENST00000432949.5_2,ENST00000392963.5_1,ENST00000420513.1_1,ENST00000599069.5_1,ENST00000599908.1_1,ENST00000449853.2_1	29,29,19,4,3,1,3
ENSG00000271732.1_4	chr1	16943886	16944224	+	339	0	0	0	0	0	0	0	0	0	0	0	0	RP5-1182A14.5	ENSG00000271732.1_4	1	ENST00000607700.1_1	1
ENSG00000215908.10_3	chr1	16944748	16983727	-	5606	907	735	870	683	627	654	492	538	675	687	567	590	CROCCP2	ENSG00000215908.10_3	7	ENST00000639481.1_1,ENST00000640476.1_1,ENST00000639594.1_1,ENST00000639456.1_1,ENST00000412962.4_3,ENST00000635081.1_1,ENST00000362058.2_2	4,6,7,13,18,10,6
ENSG00000283773.1_3	chr1	16969262	16969604	-	166	38	4	28	31	27	36	15	29	17	35	30	28	RP5-1182A14.8	ENSG00000283773.1_3	1	ENST00000639399.1_1	2
ENSG00000186301.8_2	chr1	16972117	16976784	+	2291	39	67	84	79	60	25	17	36	32	25	9	11	MST1P2	ENSG00000186301.8_2	1	ENST00000457982.3_1	18
ENSG00000282143.1_4	chr1	16983374	16994019	+	817	0	0	0	0	0	0	0	0	0	0	0	0	RP1-163M9.8	ENSG00000282143.1_4	1	ENST00000633763.1_1	3
ENSG00000207513.1	chr1	16993280	16993443	-	164	2	0	0	0	1	0	0	1	3	3	0	1	RNU1-3	ENSG00000207513.1	1	ENST00000384782.1	1
ENSG00000237847.2	chr1	16999498	17000007	+	510	0	0	0	0	0	0	0	0	0	0	0	0	AL137798.1	ENSG00000237847.2	1	ENST00000434336.2	1
ENSG00000280114.1_1	chr1	17007592	17015244	-	1351	4	0	7	3	12	4	1	8	7	8	2	13	RP5-875O13.7	ENSG00000280114.1_1	1	ENST00000624828.1_1	5
ENSG00000264742.1	chr1	17007750	17007823	+	74	0	0	0	0	0	0	0	0	0	0	0	0	AL021920.1	ENSG00000264742.1	1	ENST00000584111.1	1
ENSG00000236698.1_3	chr1	17012116	17012550	-	435	1	0	1	0	3	1	1	2	2	10	5	1	EIF1AP1	ENSG00000236698.1_3	1	ENST00000419267.1_1	1
ENSG00000268869.5_2	chr1	17013834	17046652	-	3178	18	9	28	4	26	10	1	24	28	19	30	16	ESPNP	ENSG00000268869.5_2	3	ENST00000414828.1_1,ENST00000270691.8_1,ENST00000492551.2_1	3,11,3
ENSG00000279151.1_4	chr1	17028041	17032089	+	406	0	0	0	0	0	0	0	0	0	0	0	0	RP1-163M9.7	ENSG00000279151.1_4	1	ENST00000624517.1_1	3
ENSG00000268991.1	chr1	17060447	17060956	-	510	0	0	0	0	0	0	0	0	0	0	0	0	AL021920.2	ENSG00000268991.1	1	ENST00000600179.1	1
ENSG00000282740.1_4	chr1	17066433	17077084	-	819	0	0	0	0	0	0	0	0	0	0	0	0	RP5-1182A14.7	ENSG00000282740.1_4	1	ENST00000633433.1_1	3
ENSG00000058453.16_3	chr1	17066768	17299474	+	8871	66	50	65	54	53	29	33	43	50	71	64	68	CROCC	ENSG00000058453.16_3	13	ENST00000466256.6_1,ENST00000375541.9_1,ENST00000445545.6_1,ENST00000467938.5_1,ENST00000492631.5_1,ENST00000467715.2_1,ENST00000494191.6_1,ENST00000486318.1_1,ENST00000498688.5_1,ENST00000477773.1_1,ENST00000497654.2_1,ENST00000465021.5_1,ENST00000465291.1_1	9,37,24,17,10,4,6,5,4,3,3,5,3
ENSG00000227684.2_3	chr1	17066775	17077463	+	762	0	0	0	0	0	6	0	0	0	0	0	0	RP1-163M9.5	ENSG00000227684.2_3	2	ENST00000633627.1_1,ENST00000457096.1_1	2,4
ENSG00000207389.1	chr1	17067011	17067174	+	164	0	0	0	2	0	0	0	0	0	0	0	0	RNU1-4	ENSG00000207389.1	1	ENST00000384659.1	1
ENSG00000186715.10_2	chr1	17081405	17096732	-	5180	4	2	19	35	12	5	7	4	3	7	11	2	MST1L	ENSG00000186715.10_2	5	ENST00000455405.6_1,ENST00000624762.3_1,ENST00000442552.7_1,ENST00000544155.1_1,ENST00000545160.1_1	8,15,17,3,4
ENSG00000223643.6_4	chr1	17177752	17179624	-	837	0	0	0	0	0	0	0	0	0	0	0	0	RP11-108M9.1	ENSG00000223643.6_4	2	ENST00000414340.6_1,ENST00000422345.1_1	3,4
ENSG00000230239.1_5	chr1	17181902	17185779	+	882	0	0	0	0	0	0	0	0	0	0	0	0	RP11-108M9.2	ENSG00000230239.1_5	1	ENST00000414128.1_5	3
ENSG00000263811.1	chr1	17185444	17185516	-	73	0	0	0	0	0	0	0	0	0	0	0	0	MIR3675	ENSG00000263811.1	1	ENST00000583661.1	1
ENSG00000228549.3_5	chr1	17197440	17200587	+	2963	11	25	46	15	10	31	24	6	18	34	29	40	RP11-108M9.3	ENSG00000228549.3_5	5	ENST00000438002.1_1,ENST00000619677.1_1,ENST00000451828.1_1,ENST00000453554.1_1,ENST00000457856.1_1	2,2,2,2,2
ENSG00000238142.1_4	chr1	17215033	17216144	-	508	2	3	9	0	0	0	0	7	0	3	2	1	RP11-108M9.4	ENSG00000238142.1_4	3	ENST00000422124.1_1,ENST00000416869.1_1,ENST00000457075.1_1	2,2,2
ENSG00000235241.1_4	chr1	17215590	17216097	+	508	5	0	0	0	0	0	0	0	6	0	0	0	RP11-108M9.5	ENSG00000235241.1_4	1	ENST00000453917.1_1	1
ENSG00000207005.1	chr1	17222475	17222638	+	164	0	11	0	0	6	0	0	0	0	1	0	0	RNU1-2	ENSG00000207005.1	1	ENST00000384278.1	1
ENSG00000272426.1_4	chr1	17230834	17231271	-	438	0	0	0	0	7	3	0	0	0	8	0	0	RP11-108M9.6	ENSG00000272426.1_4	1	ENST00000606899.1_2	1
ENSG00000117122.13_5	chr1	17300997	17307330	-	2915	1255	1668	2299	1830	1105	932	793	915	1447	1100	1341	1545	MFAP2	ENSG00000117122.13_5	6	ENST00000375534.7_4,ENST00000490075.5_1,ENST00000375535.3_4,ENST00000476788.5_1,ENST00000478684.5_1,ENST00000492598.1_1	8,6,9,6,5,4
ENSG00000226526.1_4	chr1	17305421	17331586	+	636	0	0	0	0	0	0	0	0	0	4	0	5	RP1-37C10.3	ENSG00000226526.1_4	1	ENST00000446261.1_1	2
ENSG00000159363.17_3	chr1	17312453	17338423	-	5253	679	984	951	707	635	592	400	408	676	671	653	698	ATP13A2	ENSG00000159363.17_3	15	ENST00000326735.12_1,ENST00000341676.9_2,ENST00000452699.5_1,ENST00000466561.1_1,ENST00000502418.1_1,ENST00000503552.1_1,ENST00000463860.5_1,ENST00000502860.1_1,ENST00000617114.4_1,ENST00000509392.1_1,ENST00000506174.5_1,ENST00000510069.5_1,ENST00000511957.5_1,ENST00000508222.5_1,ENST00000509619.1_1	29,27,29,9,7,7,7,5,14,2,6,10,7,8,6
ENSG00000117118.9_2	chr1	17345217	17380665	-	2462	1435	1265	1773	1469	1243	903	800	761	1228	935	1083	1072	SDHB	ENSG00000117118.9_2	8	ENST00000375499.7_1,ENST00000485092.5_1,ENST00000475049.5_1,ENST00000485515.5_1,ENST00000491274.5_1,ENST00000475506.1_1,ENST00000463045.2_1,ENST00000466613.2_1	8,2,3,7,6,4,5,3
ENSG00000117115.12_2	chr1	17393256	17445930	-	5984	95	64	115	150	77	79	52	39	210	153	119	152	PADI2	ENSG00000117115.12_2	4	ENST00000375486.8_1,ENST00000479534.5_1,ENST00000466151.1_1,ENST00000375481.1_1	16,4,7,11
ENSG00000252180.1	chr1	17484692	17484779	+	88	0	0	0	0	0	0	0	0	0	0	0	0	Y_RNA	ENSG00000252180.1	1	ENST00000516371.1	1
ENSG00000204362.6_4	chr1	17516278	17524112	+	4676	0	0	0	0	0	0	0	0	0	0	0	2	RP11-380J14.1	ENSG00000204362.6_4	2	ENST00000412427.1_1,ENST00000634972.1_1	3,4
ENSG00000282843.1_4	chr1	17519727	17528228	-	1228	0	0	0	0	0	0	0	0	2	0	0	0	RP11-380J14.4	ENSG00000282843.1_4	1	ENST00000635428.1_1	5
ENSG00000142623.9_2	chr1	17531621	17572500	+	4903	1	5	8	2	0	0	0	4	0	6	0	9	PADI1	ENSG00000142623.9_2	3	ENST00000375471.4_1,ENST00000483501.1_1,ENST00000460293.1_1	16,4,2
ENSG00000142619.4_2	chr1	17575593	17610728	+	3189	10	4	9	0	10	5	0	4	5	36	29	15	PADI3	ENSG00000142619.4_2	1	ENST00000375460.3_1	16
ENSG00000266634.1	chr1	17604384	17604470	+	87	0	0	0	0	0	0	0	0	0	0	0	0	MIR3972	ENSG00000266634.1	1	ENST00000582732.1	1
ENSG00000159339.13_2	chr1	17634690	17690499	+	2971	0	0	0	0	0	0	0	0	0	0	0	0	PADI4	ENSG00000159339.13_2	5	ENST00000375453.5_1,ENST00000375448.4_1,ENST00000468945.1_1,ENST00000487048.5_1,ENST00000467001.1_1	4,16,2,4,5
ENSG00000269468.1	chr1	17655507	17676070	-	339	0	0	0	0	0	0	0	0	0	0	0	0	AC004824.2	ENSG00000269468.1	1	ENST00000602074.1	6
ENSG00000276747.1_3	chr1	17698691	17728195	+	2396	0	0	0	0	0	0	0	0	0	0	0	0	PADI6	ENSG00000276747.1_3	1	ENST00000619609.1_1	17
ENSG00000227751.1_4	chr1	17733256	17733878	+	311	0	0	0	0	0	0	0	0	0	0	0	0	RP1-20B21.4	ENSG00000227751.1_4	1	ENST00000439577.1_1	2
ENSG00000179051.13_3	chr1	17733256	17766220	-	4126	7713	9231	7412	6216	6533	5899	4037	3916	9558	8244	9321	9120	RCC2	ENSG00000179051.13_3	3	ENST00000375436.8_1,ENST00000474892.1_1,ENST00000375433.3_1	13,2,12
ENSG00000266727.1	chr1	17740127	17740190	-	64	63	36	49	22	32	28	7	26	56	21	96	76	AC004824.1	ENSG00000266727.1	1	ENST00000583469.1	1
ENSG00000239020.1	chr1	17776259	17776359	+	101	0	0	0	0	0	0	0	0	0	0	0	0	snoU13	ENSG00000239020.1	1	ENST00000458798.1	1
ENSG00000074964.16_3	chr1	17866330	18024369	+	7817	250	242	284	251	302	230	162	151	267	258	267	242	ARHGEF10L	ENSG00000074964.16_3	9	ENST00000361221.7_1,ENST00000375415.5_1,ENST00000482892.1_1,ENST00000469726.5_1,ENST00000375408.7_3,ENST00000167825.5_1,ENST00000482359.1_1,ENST00000466782.1_1,ENST00000495593.1_1	29,27,3,20,20,16,3,4,2
ENSG00000236648.1_5	chr1	18044182	18076473	+	610	0	0	0	0	0	0	0	0	0	0	0	0	RP11-473A10.2	ENSG00000236648.1_5	1	ENST00000430540.1_1	4
ENSG00000117148.7_2	chr1	18081808	18153558	+	1864	0	0	2	3	0	0	0	4	8	6	1	0	ACTL8	ENSG00000117148.7_2	2	ENST00000375406.1_1,ENST00000617065.1_1	3,2
ENSG00000284653.1_2	chr1	18342206	18372106	+	2013	0	0	0	0	0	0	0	0	0	0	0	0	RP11-658E23.1	ENSG00000284653.1_2	1	ENST00000641892.1_1	4
ENSG00000261781.1_3	chr1	18392151	18400906	+	2471	0	0	0	0	0	0	0	0	0	0	0	0	RP11-174G17.2	ENSG00000261781.1_3	1	ENST00000569711.1_1	3
ENSG00000117154.11_3	chr1	18434240	18704977	+	3085	37	5	38	18	33	11	28	14	10	14	7	3	IGSF21	ENSG00000117154.11_3	4	ENST00000251296.3_1,ENST00000412684.3_1,ENST00000497331.2_1,ENST00000473951.1_1	10,6,6,2
ENSG00000280222.1_5	chr1	18435883	18442355	+	6473	25	52	31	10	16	23	25	9	102	60	58	22	RP11-174G17.3	ENSG00000280222.1_5	1	ENST00000624418.1_1	1
ENSG00000230035.2_4	chr1	18493423	18505840	-	430	0	0	0	0	0	0	0	0	0	0	0	0	RP11-174G17	ENSG00000230035.2_4	1	ENST00000419667.2_1	4
ENSG00000225387.1_4	chr1	18712323	18715008	+	491	0	0	0	0	0	0	0	0	0	0	0	0	RP11-422P22.1	ENSG00000225387.1_4	1	ENST00000420211.1_1	2
ENSG00000179023.8_2	chr1	18807476	18812620	+	5145	0	0	0	0	0	0	0	0	0	0	0	1	KLHDC7A	ENSG00000179023.8_2	1	ENST00000400664.2_1	1
ENSG00000235282.3_3	chr1	18839612	18839877	+	266	0	0	0	0	0	0	0	0	0	0	0	0	RP1-8B22.1	ENSG00000235282.3_3	1	ENST00000596113.1_1	1
ENSG00000225478.2_4	chr1	18921908	18922130	+	223	0	0	0	0	0	0	0	0	0	0	0	0	RP1-8B22.2	ENSG00000225478.2_4	1	ENST00000450125.2_1	1
ENSG00000009709.11_2	chr1	18957500	19075360	+	6313	33	76	102	72	36	48	24	38	40	38	48	25	PAX7	ENSG00000009709.11_2	3	ENST00000375375.7_1,ENST00000420770.6_1,ENST00000400661.3_1	8,9,8
ENSG00000179002.5_3	chr1	19166093	19186176	-	2542	0	0	0	9	0	0	0	0	0	0	0	0	TAS1R2	ENSG00000179002.5_3	1	ENST00000375371.3_1	6
ENSG00000255275.3_5	chr1	19175767	19247615	-	4369	83	138	76	99	85	59	63	65	127	110	140	116	RP13-279N23.2	ENSG00000255275.3_5	1	ENST00000494072.3_3	27
ENSG00000159423.16_3	chr1	19197924	19229275	-	3689	136	210	195	165	143	114	109	113	319	428	286	282	ALDH4A1	ENSG00000159423.16_3	6	ENST00000290597.9_1,ENST00000538839.5_2,ENST00000375341.7_1,ENST00000538309.5_1,ENST00000454547.1_1,ENST00000432718.1_1	16,14,15,15,4,6
ENSG00000265606.1	chr1	19209696	19209769	-	74	1	0	0	0	0	0	0	0	0	0	0	0	MIR4695	ENSG00000265606.1	1	ENST00000577305.1	1
ENSG00000221662.1	chr1	19223565	19223642	-	78	0	0	0	0	0	0	0	0	0	0	0	0	MIR1290	ENSG00000221662.1	1	ENST00000408735.1	1
ENSG00000169991.10_3	chr1	19230775	19283180	-	6188	214	314	261	241	241	197	137	146	305	347	278	227	IFFO2	ENSG00000169991.10_3	3	ENST00000455833.6_2,ENST00000355609.8_1,ENST00000416166.1_3	9,3,8
ENSG00000272084.1_5	chr1	19398604	19402005	-	3402	418	550	769	618	415	395	382	382	679	774	643	735	RP5-1126H10.2	ENSG00000272084.1_5	1	ENST00000606379.1_1	1
ENSG00000127481.14_3	chr1	19401000	19536770	-	24675	10894	12389	16879	13828	10485	9522	8771	8289	16204	16243	17300	16193	UBR4	ENSG00000127481.14_3	17	ENST00000375254.7_1,ENST00000375225.7_1,ENST00000375224.1_1,ENST00000459947.5_1,ENST00000486515.1_1,ENST00000492606.1_1,ENST00000467272.6_1,ENST00000483922.1_1,ENST00000494503.1_1,ENST00000466969.1_1,ENST00000375218.3_1,ENST00000425413.5_1,ENST00000417040.1_1,ENST00000475973.1_1,ENST00000465036.1_1,ENST00000419533.1_1,ENST00000497018.1_1	106,4,21,3,3,2,8,3,4,2,5,21,41,4,2,30,2
ENSG00000266098.1	chr1	19410046	19410145	-	100	0	3	0	7	0	0	0	1	0	0	1	2	AL137127.1	ENSG00000266098.1	1	ENST00000582644.1	1
ENSG00000230424.1_4	chr1	19536995	19567198	+	507	6	18	18	1	6	9	0	3	7	9	2	8	RP1-43E13.2	ENSG00000230424.1_4	1	ENST00000437898.1_1	2
ENSG00000127463.14_5	chr1	19542158	19578046	-	9623	1156	1489	1492	1090	1017	1013	1126	903	882	1343	942	975	EMC1	ENSG00000127463.14_5	13	ENST00000477853.5_1,ENST00000480380.1_1,ENST00000375199.7_2,ENST00000375208.7_3,ENST00000461353.1_1,ENST00000486405.1_3,ENST00000486238.1_3,ENST00000494770.6_2,ENST00000462505.1_1,ENST00000641089.1_1,ENST00000467423.2_2,ENST00000475079.1_1,ENST00000488681.1_1	23,3,23,22,2,5,4,6,3,6,2,4,2
ENSG00000053372.4_2	chr1	19578033	19586622	+	2822	88	142	114	120	123	80	91	122	111	182	114	130	MRTO4	ENSG00000053372.4_2	3	ENST00000330263.4_1,ENST00000493700.1_1,ENST00000479559.1_1	8,3,3
ENSG00000211454.13_2	chr1	19592476	19600688	-	2768	3	9	36	23	6	0	2	12	2	16	9	7	AKR7L	ENSG00000211454.13_2	4	ENST00000457194.6_1,ENST00000429712.5_1,ENST00000420396.3_1,ENST00000493176.1_1	5,7,8,2
ENSG00000162482.4_2	chr1	19609052	19615744	-	1710	15	27	49	38	18	14	20	16	39	27	30	46	AKR7A3	ENSG00000162482.4_2	1	ENST00000361640.4_1	7
ENSG00000270728.1_4	chr1	19623574	19624397	+	525	0	0	0	0	0	0	0	0	0	0	0	0	RP4-657E11.10	ENSG00000270728.1_4	1	ENST00000604801.1_1	2
ENSG00000053371.12_4	chr1	19630459	19638640	-	1781	1147	1365	1029	775	932	964	606	650	1104	1016	951	1216	AKR7A2	ENSG00000053371.12_4	5	ENST00000235835.7_1,ENST00000330072.9_2,ENST00000489286.5_1,ENST00000481966.1_2,ENST00000492217.1_1	7,6,5,5,3
ENSG00000200403.1	chr1	19631570	19631676	-	107	4	10	10	5	10	3	1	6	14	5	0	0	RNU6-1099P	ENSG00000200403.1	1	ENST00000363533.1	1
ENSG00000040487.12_3	chr1	19638820	19655794	+	2686	178	229	225	186	217	194	71	77	174	233	194	178	PQLC2	ENSG00000040487.12_3	6	ENST00000375155.7_1,ENST00000375153.7_1,ENST00000469076.5_1,ENST00000400548.6_1,ENST00000497827.1_1,ENST00000432465.1_3	9,8,8,8,8,5
ENSG00000265192.1	chr1	19646299	19646554	-	256	0	0	0	0	0	0	0	0	0	0	0	0	RN7SL85P	ENSG00000265192.1	1	ENST00000583604.1	1
ENSG00000077549.17_4	chr1	19665270	19812033	-	3238	1626	2167	2639	1787	1436	1288	1074	1140	1123	794	966	1100	CAPZB	ENSG00000077549.17_4	9	ENST00000264203.7_1,ENST00000375144.5_1,ENST00000375142.5_3,ENST00000433834.5_2,ENST00000264202.7_3,ENST00000459967.6_1,ENST00000457768.5_1,ENST00000489607.5_1,ENST00000482808.1_1	9,8,10,9,9,5,4,5,5
ENSG00000240490.2	chr1	19750878	19751163	+	286	0	0	0	0	0	0	0	0	0	0	0	0	RN7SL277P	ENSG00000240490.2	1	ENST00000481521.2	1
ENSG00000201609.1	chr1	19837087	19837227	+	141	0	0	0	0	0	0	0	0	0	0	0	0	RNU4-28P	ENSG00000201609.1	1	ENST00000364739.1	1
ENSG00000239027.1	chr1	19858664	19858768	-	105	0	0	0	0	0	0	0	0	0	0	0	0	snoU13	ENSG00000239027.1	1	ENST00000458906.1	1
ENSG00000235185.1_4	chr1	19918296	19923326	-	207	0	3	0	0	0	2	0	14	0	0	1	1	RP5-1056L3.1	ENSG00000235185.1_4	1	ENST00000416470.1_1	2
ENSG00000173436.13_3	chr1	19923471	19956315	+	5227	116	143	93	88	101	102	80	52	149	139	112	96	MINOS1	ENSG00000173436.13_3	10	ENST00000617872.4_1,ENST00000486890.5_1,ENST00000322753.6_1,ENST00000498067.1_1,ENST00000462646.5_1,ENST00000467029.5_1,ENST00000481464.5_1,ENST00000498642.5_1,ENST00000479642.1_1,ENST00000485362.1_1	3,4,4,2,4,5,5,5,2,5
ENSG00000158747.14_4	chr1	19923473	19984949	+	3596	481	715	563	638	489	389	280	415	665	973	488	600	NBL1	ENSG00000158747.14_4	14	ENST00000602662.1_4,ENST00000428975.5_4,ENST00000289749.6_3,ENST00000451758.5_4,ENST00000622566.4_2,ENST00000439664.5_2,ENST00000621723.4_2,ENST00000375136.7_2,ENST00000425400.5_4,ENST00000618761.4_2,ENST00000439278.5_3,ENST00000615215.4_2,ENST00000427894.5_4,ENST00000548815.2_2	4,4,4,4,4,4,4,4,4,4,3,4,4,4
ENSG00000270136.6_4	chr1	19923561	19983420	+	1276	217	354	273	303	310	208	145	238	316	485	281	290	MINOS1-NBL1	ENSG00000270136.6_4	3	ENST00000602384.5_4,ENST00000602293.5_4,ENST00000602450.1_4	10,9,5
ENSG00000226396.1_4	chr1	19934608	19935062	+	455	17	15	22	8	3	0	1	18	12	0	18	6	RP5-1056L3.3	ENSG00000226396.1_4	1	ENST00000457263.1_1	1
ENSG00000158748.3_2	chr1	19991780	20006055	+	1984	21	50	45	4	33	27	13	36	33	36	14	26	HTR6	ENSG00000158748.3_2	1	ENST00000289753.1_1	3
ENSG00000162542.13_3	chr1	20008706	20126438	-	4054	58	119	111	123	100	88	43	38	132	38	112	87	TMCO4	ENSG00000162542.13_3	8	ENST00000294543.10_3,ENST00000375127.5_3,ENST00000489814.5_1,ENST00000494342.1_1,ENST00000489135.5_1,ENST00000496528.5_1,ENST00000462171.1_1,ENST00000488449.1_1	16,16,5,2,9,7,4,5
ENSG00000178828.6_2	chr1	20140522	20141771	-	1250	0	0	0	0	0	0	0	0	0	0	0	0	RNF186	ENSG00000178828.6_2	1	ENST00000375121.3_1	1
ENSG00000235434.1_4	chr1	20140860	20145995	+	447	0	0	0	0	0	0	0	0	0	0	0	0	RP11-91K11.2	ENSG00000235434.1_4	1	ENST00000454736.1_1	2
ENSG00000169914.5_2	chr1	20209006	20239438	+	6767	248	171	191	210	168	97	105	77	175	147	132	150	OTUD3	ENSG00000169914.5_2	3	ENST00000375120.3_1,ENST00000466697.1_1,ENST00000481686.1_1	8,3,2
ENSG00000188784.4_2	chr1	20246502	20250110	-	785	0	0	0	0	0	0	0	0	0	0	0	0	PLA2G2E	ENSG00000188784.4_2	1	ENST00000375116.3_1	4
ENSG00000242688.2	chr1	20297462	20297760	+	299	0	0	0	0	0	0	0	0	0	0	0	0	RN7SL304P	ENSG00000242688.2	1	ENST00000488028.2	1
ENSG00000188257.10_2	chr1	20301924	20306909	-	1685	0	0	0	0	0	2	0	0	0	0	0	0	PLA2G2A	ENSG00000188257.10_2	7	ENST00000469162.5_1,ENST00000400520.7_1,ENST00000496748.1_1,ENST00000375111.7_1,ENST00000491964.5_1,ENST00000482011.1_1,ENST00000461140.1_1	5,5,3,6,6,6,2
ENSG00000127472.10_2	chr1	20354672	20417683	+	2607	0	0	0	0	0	0	0	0	0	0	0	0	PLA2G5	ENSG00000127472.10_2	8	ENST00000486277.5_1,ENST00000465698.5_1,ENST00000460175.5_1,ENST00000469069.5_1,ENST00000489871.5_1,ENST00000498348.1_1,ENST00000375108.3_1,ENST00000478803.1_1	10,8,7,7,8,4,5,7
ENSG00000117215.14_2	chr1	20438432	20446059	-	2681	0	0	0	0	0	0	0	0	0	0	7	1	PLA2G2D	ENSG00000117215.14_2	2	ENST00000375105.7_1,ENST00000617227.1_1	4,3
ENSG00000158786.4_2	chr1	20465819	20476879	+	6440	0	0	0	0	0	0	0	0	0	0	0	0	PLA2G2F	ENSG00000158786.4_2	2	ENST00000375102.3_1,ENST00000465062.1_1	5,2
ENSG00000227066.1_4	chr1	20480831	20487061	+	2639	0	0	0	0	0	0	0	0	0	0	0	0	RP3-340N1.2	ENSG00000227066.1_4	2	ENST00000417884.1_1,ENST00000431027.1_2	2,2
ENSG00000187980.6_2	chr1	20487746	20503917	-	3298	0	0	0	0	0	0	0	0	0	0	0	0	PLA2G2C	ENSG00000187980.6_2	3	ENST00000429261.2_1,ENST00000495760.2_1,ENST00000247992.5_1	4,2,3
ENSG00000225986.1_4	chr1	20510735	20512979	-	510	0	0	0	0	0	0	0	0	0	0	0	0	RP3-340N1.5	ENSG00000225986.1_4	1	ENST00000442226.1_1	2
ENSG00000162543.5_2	chr1	20512578	20522541	+	5571	0	0	0	0	0	0	0	0	0	0	0	0	UBXN10	ENSG00000162543.5_2	1	ENST00000375099.3_1	2
ENSG00000228105.1_3	chr1	20569588	20571148	+	480	0	0	0	0	0	0	0	0	0	0	0	0	RP3-340N1.6	ENSG00000228105.1_3	1	ENST00000435552.1_1	2
ENSG00000284710.1_2	chr1	20598511	20601498	+	1639	0	0	0	0	0	0	0	0	0	0	0	0	RP3-340N1.7	ENSG00000284710.1_2	2	ENST00000641574.1_1,ENST00000641138.1_1	2,3
ENSG00000158816.15_3	chr1	20617412	20681387	+	6377	22	5	26	10	14	4	4	4	33	22	60	33	VWA5B1	ENSG00000158816.15_3	8	ENST00000485375.6_1,ENST00000375079.6_1,ENST00000289815.12_1,ENST00000473325.5_1,ENST00000530722.5_1,ENST00000534075.1_2,ENST00000467486.5_3,ENST00000525343.1_1	22,22,22,15,3,4,12,10
ENSG00000226664.1_4	chr1	20620704	20649680	-	229	0	0	0	0	0	0	0	0	0	0	0	0	RP4-745E8.2	ENSG00000226664.1_4	1	ENST00000444923.1_1	2
ENSG00000236963.6_4	chr1	20687072	20757727	-	3394	0	0	0	0	0	0	0	0	0	0	0	0	RP4-749H3.1	ENSG00000236963.6_4	5	ENST00000426428.5_1,ENST00000635577.1_1,ENST00000635564.1_1,ENST00000418743.5_1,ENST00000423486.1_1	12,7,8,5,5
ENSG00000226487.1_5	chr1	20738797	20739746	-	376	0	0	0	0	0	0	0	0	0	0	0	0	RP4-749H3.2	ENSG00000226487.1_5	1	ENST00000421114.1_1	3
ENSG00000284641.1_2	chr1	20802715	20805430	+	1340	0	0	0	0	0	0	0	0	0	0	0	0	RP4-749H3.4	ENSG00000284641.1_2	2	ENST00000641552.1_1,ENST00000641937.1_1	2,2
ENSG00000284743.1_2	chr1	20805272	20806890	-	674	0	0	0	0	0	1	0	0	0	0	0	0	RP4-749H3.3	ENSG00000284743.1_2	1	ENST00000641097.1_1	2
ENSG00000162545.5_2	chr1	20808884	20812713	-	2615	113	121	130	73	132	73	87	44	145	199	62	94	CAMK2N1	ENSG00000162545.5_2	2	ENST00000375078.3_1,ENST00000489020.1_1	2,2
ENSG00000090432.6_2	chr1	20825941	20834654	-	2438	214	286	265	290	245	177	79	139	207	182	251	285	MUL1	ENSG00000090432.6_2	1	ENST00000264198.4_1	4
ENSG00000215520.3_3	chr1	20852482	20853244	+	763	0	0	0	0	0	0	0	0	0	0	0	0	RP11-401M16.3	ENSG00000215520.3_3	1	ENST00000443195.1_1	1
ENSG00000183114.7_2	chr1	20878932	20881503	+	2572	49	92	55	70	33	37	70	36	50	121	42	42	FAM43B	ENSG00000183114.7_2	1	ENST00000332947.5_1	1
ENSG00000158825.5_2	chr1	20915441	20945401	+	963	42	93	90	125	42	40	46	44	137	69	112	83	CDA	ENSG00000158825.5_2	2	ENST00000375071.3_1,ENST00000461985.1_1	4,3
ENSG00000158828.7_3	chr1	20959948	20978004	+	4836	581	784	843	813	533	613	503	507	573	954	615	712	PINK1	ENSG00000158828.7_3	3	ENST00000321556.4_1,ENST00000492302.1_1,ENST00000400490.2_1	8,5,4
ENSG00000117242.7_5	chr1	20969150	20978686	-	4443	358	512	441	362	411	384	211	317	584	546	683	579	RP11-401M16.7	ENSG00000117242.7_5	1	ENST00000451424.1_1	3
ENSG00000257033.1	chr1	20976856	20977207	-	348	132	160	83	120	112	94	58	93	184	119	170	177	AL391357.1	ENSG00000257033.1	1	ENST00000535128.1	2
ENSG00000244038.9_5	chr1	20978260	20988037	-	2721	2094	2350	1557	1341	1839	1456	1273	1368	1878	1851	2023	1792	DDOST	ENSG00000244038.9_5	6	ENST00000415136.6_3,ENST00000602624.6_3,ENST00000375048.7_3,ENST00000475210.1_1,ENST00000464364.1_3,ENST00000477229.1_1	11,11,11,2,4,2
ENSG00000117245.12_3	chr1	20990507	21044510	-	4470	737	1117	1622	1274	737	688	554	657	1689	1660	1633	1688	KIF17	ENSG00000117245.12_3	9	ENST00000493818.1_1,ENST00000477167.5_1,ENST00000490034.5_1,ENST00000375044.5_1,ENST00000400463.7_1,ENST00000247986.2_1,ENST00000462858.5_1,ENST00000498225.1_1,ENST00000463389.1_1	2,6,9,15,15,15,6,6,2
ENSG00000235432.1_4	chr1	21019227	21020506	-	479	0	4	12	0	4	2	4	1	0	10	0	1	RP5-930J4.5	ENSG00000235432.1_4	1	ENST00000440621.1_1	4
ENSG00000189410.11_4	chr1	21046225	21059330	-	4423	172	237	149	131	103	177	82	89	183	242	159	273	SH2D5	ENSG00000189410.11_4	7	ENST00000375031.5_1,ENST00000460804.5_1,ENST00000444387.6_3,ENST00000447746.6_2,ENST00000518294.5_3,ENST00000517430.5_2,ENST00000519434.1_3	9,6,10,5,6,5,5
ENSG00000233069.1_4	chr1	21059373	21060445	+	299	0	8	0	0	0	0	0	0	0	0	0	0	RP5-930J4.2	ENSG00000233069.1_4	1	ENST00000436642.1_1	2
ENSG00000127483.17_3	chr1	21069154	21113816	-	7442	2019	2389	3445	2759	2134	2167	1841	1600	2402	2425	2086	2104	HP1BP3	ENSG00000127483.17_3	14	ENST00000312239.9_1,ENST00000375003.6_1,ENST00000488722.5_1,ENST00000491748.1_1,ENST00000419948.5_1,ENST00000438032.5_1,ENST00000424732.5_1,ENST00000417710.5_1,ENST00000487117.1_1,ENST00000375000.5_1,ENST00000437575.5_1,ENST00000419490.5_1,ENST00000414993.1_1,ENST00000443615.1_1	13,9,5,3,7,9,8,5,3,5,4,3,4,2
ENSG00000203394.2	chr1	21069480	21070455	+	572	0	0	0	0	0	0	0	0	0	0	0	0	RP5-930J4.4	ENSG00000203394.2	1	ENST00000413451.1	2
ENSG00000075151.20_3	chr1	21132785	21503381	-	9596	8464	9289	10650	8328	7360	7074	5082	4919	7902	6820	7435	7544	EIF4G3	ENSG00000075151.20_3	14	ENST00000374935.7_1,ENST00000264211.12_1,ENST00000602326.5_1,ENST00000400422.6_1,ENST00000634879.1_2,ENST00000435383.1_1,ENST00000374933.3_1,ENST00000485722.1_1,ENST00000356916.7_1,ENST00000438975.5_1,ENST00000411888.5_1,ENST00000476088.1_1,ENST00000463775.1_1,ENST00000634778.1_1	33,31,35,35,34,5,5,2,15,10,9,4,4,2
ENSG00000251914.1	chr1	21167734	21167795	+	62	0	0	0	0	0	0	0	0	0	0	0	0	RNU7-200P	ENSG00000251914.1	1	ENST00000516105.1	1
ENSG00000221808.1	chr1	21314807	21314925	-	119	1	25	18	4	2	2	0	0	0	3	16	3	MIR1256	ENSG00000221808.1	1	ENST00000408881.1	1
ENSG00000233072.1_3	chr1	21330043	21330427	-	385	0	0	0	0	0	0	0	0	0	0	0	0	RP11-487E1.1	ENSG00000233072.1_3	1	ENST00000420703.1_1	1
ENSG00000236073.2_4	chr1	21400132	21400246	-	115	0	15	1	0	8	8	2	0	19	4	15	5	RP11-487E1.2	ENSG00000236073.2_4	1	ENST00000431514.2_1	1
ENSG00000235112.1_3	chr1	21487968	21488574	+	296	0	0	0	0	0	0	0	0	0	0	0	0	RP11-628K18.1	ENSG00000235112.1_3	1	ENST00000430808.1_1	2
ENSG00000266867.1	chr1	21503059	21503122	-	64	0	0	0	0	0	0	0	0	0	0	0	0	AL031005.1	ENSG00000266867.1	1	ENST00000584440.1	1
ENSG00000117298.14_3	chr1	21543740	21671997	-	7265	814	1071	2017	1508	695	746	609	755	719	781	767	716	ECE1	ENSG00000117298.14_3	13	ENST00000415912.6_1,ENST00000357071.8_2,ENST00000531334.1_1,ENST00000374893.10_3,ENST00000436918.6_1,ENST00000264205.10_3,ENST00000526194.5_1,ENST00000470394.1_1,ENST00000528294.1_1,ENST00000473505.5_1,ENST00000481130.6_1,ENST00000527991.2_1,ENST00000463334.2_1	19,17,2,19,18,18,14,4,5,4,4,4,4
ENSG00000236936.1_4	chr1	21592575	21593744	+	723	0	0	0	0	0	0	0	0	0	0	0	0	RP3-329E20.2	ENSG00000236936.1_4	1	ENST00000416959.1_1	3
ENSG00000231105.1_4	chr1	21619783	21626267	+	2479	40	62	46	49	24	39	13	22	54	55	54	81	RP5-1071N3.1	ENSG00000231105.1_4	1	ENST00000449034.1_1	3
ENSG00000236216.5_3	chr1	21724480	21724855	+	376	0	6	1	0	0	0	1	0	0	0	0	1	RP11-560O15.1	ENSG00000236216.5_3	1	ENST00000486095.1_1	1
ENSG00000228823.1_4	chr1	21737953	21739786	-	649	0	0	0	0	0	0	0	0	0	0	0	0	RP11-293F5.8	ENSG00000228823.1_4	1	ENST00000443127.1_1	2
ENSG00000236009.1_4	chr1	21742391	21743985	+	761	0	0	0	0	0	0	0	0	0	0	0	0	RP11-293F5.1	ENSG00000236009.1_4	2	ENST00000444647.1_1,ENST00000423921.1_1	3,3
ENSG00000227001.3_3	chr1	21751118	21754460	-	661	7	1	16	2	0	0	0	1	5	8	0	1	RP11-293F5.2	ENSG00000227001.3_3	1	ENST00000453025.1_1	5
ENSG00000187952.9_3	chr1	21754796	21756029	+	1234	0	1	0	0	0	0	0	0	0	1	0	0	HS6ST1P	ENSG00000187952.9_3	1	ENST00000481504.2_1	1
ENSG00000186543.7_3	chr1	21760811	21764051	+	830	0	0	0	0	0	0	0	0	0	0	4	0	RP11-293F5.4	ENSG00000186543.7_3	1	ENST00000436658.1_1	5
ENSG00000142794.18_3	chr1	21766621	21811498	+	6812	521	520	343	353	273	292	178	225	317	428	415	415	NBPF3	ENSG00000142794.18_3	13	ENST00000454000.6_1,ENST00000475869.2_1,ENST00000318220.10_1,ENST00000478653.6_1,ENST00000485941.2_1,ENST00000342104.9_2,ENST00000486229.5_1,ENST00000318249.9_1,ENST00000434838.6_3,ENST00000467103.2_1,ENST00000619554.1_2,ENST00000469876.5_1,ENST00000477050.1_1	14,3,18,3,3,15,6,15,19,3,14,9,5
ENSG00000176378.8_3	chr1	21786249	21786575	-	327	0	0	0	0	0	0	0	0	0	0	0	0	RP11-293F5.6	ENSG00000176378.8_3	1	ENST00000455962.2_1	1
ENSG00000162551.13_4	chr1	21835865	21904905	+	3007	439	589	470	438	350	345	228	373	578	587	634	605	ALPL	ENSG00000162551.13_4	7	ENST00000374840.7_2,ENST00000468526.1_1,ENST00000539907.5_1,ENST00000540617.5_2,ENST00000374832.5_2,ENST00000374830.2_3,ENST00000374829.2_1	12,5,10,11,12,4,4
ENSG00000233431.1_4	chr1	21912965	21917680	+	821	0	0	0	0	0	0	0	0	0	0	0	0	RP11-63N8.3	ENSG00000233431.1_4	1	ENST00000457706.1_1	2
ENSG00000221781.1	chr1	21918904	21919041	-	138	0	0	0	0	0	0	0	0	0	0	0	0	AL359815.1	ENSG00000221781.1	1	ENST00000408854.1	1
ENSG00000076864.19_4	chr1	21922708	21995856	-	5755	225	327	168	195	183	151	137	191	392	352	282	330	RAP1GAP	ENSG00000076864.19_4	13	ENST00000290101.8_2,ENST00000374763.6_2,ENST00000374761.6_2,ENST00000471600.6_1,ENST00000374765.8_2,ENST00000611549.4_1,ENST00000542643.6_2,ENST00000495204.5_2,ENST00000374757.7_1,ENST00000317967.11_2,ENST00000447293.5_1,ENST00000482984.5_1,ENST00000464457.1_1	27,23,23,25,25,25,27,25,10,8,6,5,6
ENSG00000090686.15_2	chr1	22004791	22110099	-	9497	1291	1282	1722	1280	1048	1037	1409	810	1121	1291	1124	1041	USP48	ENSG00000090686.15_2	15	ENST00000400301.5_2,ENST00000308271.13_1,ENST00000374732.7_1,ENST00000479177.1_1,ENST00000529637.5_1,ENST00000464577.1_1,ENST00000471752.1_1,ENST00000487880.2_1,ENST00000526044.5_1,ENST00000534705.5_1,ENST00000421625.6_1,ENST00000374730.2_1,ENST00000527823.5_1,ENST00000532737.1_1,ENST00000489108.1_1	26,27,15,2,27,5,2,4,4,4,11,5,4,5,2
ENSG00000231978.2_4	chr1	22094762	22095068	+	307	0	0	0	0	0	0	0	0	0	0	0	0	RP11-132G19.3	ENSG00000231978.2_4	1	ENST00000434488.2_1	1
ENSG00000187942.11_2	chr1	22138758	22151714	+	4490	0	13	2	0	2	0	0	0	0	9	1	0	LDLRAD2	ENSG00000187942.11_2	3	ENST00000344642.6_1,ENST00000543870.1_1,ENST00000484271.1_1	5,6,2
ENSG00000142798.18_3	chr1	22148738	22263790	-	18107	1105	1547	1152	1281	788	799	505	709	625	459	528	702	HSPG2	ENSG00000142798.18_3	15	ENST00000486901.1_1,ENST00000374695.7_1,ENST00000481644.1_1,ENST00000635682.1_1,ENST00000471322.2_1,ENST00000374676.4_1,ENST00000453796.1_1,ENST00000493940.2_1,ENST00000644714.1_1,ENST00000427897.1_1,ENST00000498495.1_1,ENST00000480900.1_1,ENST00000412328.5_1,ENST00000374673.3_1,ENST00000439717.2_1	11,97,2,9,5,2,4,4,6,5,3,4,6,4,5
ENSG00000232037.3_4	chr1	22234591	22235073	+	483	0	0	0	0	2	0	0	0	0	0	0	0	RP11-26H16.1	ENSG00000232037.3_4	1	ENST00000423231.1_1	1
ENSG00000283234.1_4	chr1	22277172	22283364	-	1162	0	0	0	0	0	0	0	0	0	0	0	0	RP11-26H16.4	ENSG00000283234.1_4	2	ENST00000637118.1_1,ENST00000636906.1_1	2,1
ENSG00000219073.7_2	chr1	22303514	22325135	+	1541	0	0	5	0	0	0	0	3	0	0	0	0	CELA3B	ENSG00000219073.7_2	4	ENST00000337107.10_1,ENST00000374666.1_1,ENST00000400277.2_1,ENST00000473526.1_1	8,5,5,4
ENSG00000264385.1	chr1	22305444	22305729	-	286	0	0	0	0	0	0	0	0	0	0	0	0	RN7SL421P	ENSG00000264385.1	1	ENST00000582599.1	1
ENSG00000263991.1	chr1	22313974	22314268	+	295	0	0	0	0	0	0	0	0	0	0	0	0	RN7SL386P	ENSG00000263991.1	1	ENST00000485776.2	1
ENSG00000201919.1	chr1	22314309	22314412	+	104	0	0	0	0	0	0	0	0	0	0	0	0	RNU6-1022P	ENSG00000201919.1	1	ENST00000365049.1	1
ENSG00000142789.19_2	chr1	22328149	22339032	+	1224	0	0	0	7	0	0	0	0	0	0	0	2	CELA3A	ENSG00000142789.19_2	3	ENST00000290122.7_1,ENST00000374663.1_1,ENST00000400271.2_1	8,4,4
ENSG00000263582.1	chr1	22330078	22330361	-	284	0	0	0	0	0	0	0	0	0	0	0	0	RN7SL768P	ENSG00000263582.1	1	ENST00000584415.1	1
ENSG00000263929.1	chr1	22337143	22337437	+	295	0	0	0	0	0	0	0	0	0	0	0	0	RN7SL186P	ENSG00000263929.1	1	ENST00000466485.2	1
ENSG00000201273.1	chr1	22337478	22337581	+	104	0	0	0	0	0	0	0	0	0	0	0	0	RNU6-776P	ENSG00000201273.1	1	ENST00000364403.1	1
ENSG00000228397.2_3	chr1	22350483	22352541	-	1126	3	34	36	22	14	21	7	10	14	42	27	35	RP1-224A6.3	ENSG00000228397.2_3	2	ENST00000455966.2_1,ENST00000635097.1_1	3,3
ENSG00000218510.7_4	chr1	22351051	22357716	+	3764	308	459	406	332	292	241	200	185	348	454	311	379	RP1-224A6.4	ENSG00000218510.7_4	13	ENST00000635675.2_2,ENST00000434233.2_2,ENST00000634934.2_2,ENST00000634712.2_2,ENST00000635450.2_2,ENST00000634451.2_2,ENST00000420503.1_1,ENST00000416769.2_2,ENST00000642072.1_1,ENST00000404210.5_2,ENST00000641009.1_1,ENST00000452322.2_2,ENST00000642137.1_1	3,2,3,2,2,4,3,2,3,3,2,3,1
ENSG00000070831.15_4	chr1	22379120	22419439	+	3598	4047	3796	5074	4031	3251	2846	2026	2115	4204	2618	4157	3795	CDC42	ENSG00000070831.15_4	5	ENST00000400259.5_4,ENST00000344548.7_4,ENST00000315554.12_4,ENST00000498236.1_1,ENST00000411827.1_1	6,7,6,7,5
ENSG00000230068.2_4	chr1	22385690	22390692	+	692	4	0	5	1	2	11	1	1	5	2	0	2	RP1-224A6.6	ENSG00000230068.2_4	1	ENST00000431803.2_1	2
ENSG00000271428.1_4	chr1	22394833	22395320	-	488	0	0	0	0	0	0	0	0	0	0	0	0	RP1-224A6.8	ENSG00000271428.1_4	1	ENST00000604049.1_1	1
ENSG00000271840.1_4	chr1	22427106	22427853	+	748	13	2	14	4	4	2	0	10	6	2	2	10	RP1-224A6.9	ENSG00000271840.1_4	1	ENST00000606754.1_1	1
ENSG00000162552.14_2	chr1	22443798	22470462	-	4527	2	0	0	2	4	6	9	1	23	28	12	16	WNT4	ENSG00000162552.14_2	3	ENST00000290167.10_1,ENST00000415567.1_1,ENST00000441048.1_1	5,2,3
ENSG00000266564.1	chr1	22592732	22592793	+	62	0	0	0	0	0	0	0	0	0	0	0	0	MIR4418	ENSG00000266564.1	1	ENST00000581169.1	1
ENSG00000234397.3_4	chr1	22649333	22649824	-	492	0	0	0	0	0	0	0	0	0	0	0	0	RP11-415K20.1	ENSG00000234397.3_4	1	ENST00000487348.1_1	1
ENSG00000279625.1_4	chr1	22691123	22692975	-	1853	0	0	0	0	0	0	0	0	7	0	0	0	RP11-415K20.2	ENSG00000279625.1_4	1	ENST00000624125.1_1	1
ENSG00000184677.16_3	chr1	22778344	22857650	+	8992	1891	2051	3243	2497	1718	1530	1318	1397	1888	1836	2515	2031	ZBTB40	ENSG00000184677.16_3	4	ENST00000404138.5_2,ENST00000374651.8_2,ENST00000400239.6_1,ENST00000375647.4_2	19,16,7,18
ENSG00000237200.1_4	chr1	22843967	22846201	+	273	97	133	118	134	78	69	66	53	58	96	53	28	RP1-61A9.4	ENSG00000237200.1_4	1	ENST00000438551.1_1	2
ENSG00000070886.11_3	chr1	22890057	22930087	+	5358	249	288	312	247	239	216	155	215	276	243	149	192	EPHA8	ENSG00000070886.11_3	2	ENST00000374644.8_1,ENST00000166244.7_1	5,17
ENSG00000173372.16_3	chr1	22962999	22966101	+	1272	0	0	0	0	0	0	0	0	0	0	0	0	C1QA	ENSG00000173372.16_3	3	ENST00000374642.7_1,ENST00000438241.1_2,ENST00000402322.1_1	3,3,2
ENSG00000159189.11_2	chr1	22970123	22974603	+	1335	0	0	0	0	0	0	0	0	0	0	0	0	C1QC	ENSG00000159189.11_2	3	ENST00000374640.8_1,ENST00000374639.7_1,ENST00000374637.1_1	3,3,3
ENSG00000173369.15_3	chr1	22979255	22988031	+	1601	0	0	5	0	0	0	0	0	0	0	0	0	C1QB	ENSG00000173369.15_3	4	ENST00000510260.5_1,ENST00000509305.5_3,ENST00000432749.6_1,ENST00000314933.6_3	3,3,4,3
ENSG00000133216.16_4	chr1	23037332	23247993	+	12516	528	698	740	744	467	370	251	346	106	119	140	183	EPHB2	ENSG00000133216.16_4	7	ENST00000544305.5_1,ENST00000374630.7_2,ENST00000400191.7_3,ENST00000374632.7_1,ENST00000374627.1_4,ENST00000465676.1_1,ENST00000490436.1_1	7,16,17,16,15,7,2
ENSG00000265422.1	chr1	23046010	23046091	+	82	0	0	0	0	0	0	0	0	0	0	0	0	MIR4684	ENSG00000265422.1	1	ENST00000581646.1	1
ENSG00000216157.2	chr1	23075310	23075404	-	95	0	0	0	0	0	0	0	0	0	0	0	0	AL611946.1	ENSG00000216157.2	1	ENST00000401338.2	1
ENSG00000225952.1_4	chr1	23162206	23163342	-	480	0	0	0	0	0	0	0	0	0	0	0	0	RP11-69E9.1	ENSG00000225952.1_4	1	ENST00000419644.1_1	2
ENSG00000264014.1	chr1	23189652	23189719	-	68	0	0	0	0	0	0	0	0	0	0	0	0	MIR4253	ENSG00000264014.1	1	ENST00000581187.1	1
ENSG00000215906.8_3	chr1	23279536	23291831	-	1641	0	0	0	0	0	0	0	0	0	0	0	0	LACTBL1	ENSG00000215906.8_3	2	ENST00000426928.6_2,ENST00000618559.1_2	6,6
ENSG00000227868.5_4	chr1	23337327	23342343	-	658	5	9	15	16	11	11	8	6	12	5	7	0	C1orf234	ENSG00000227868.5_4	3	ENST00000440767.2_2,ENST00000566855.3_2,ENST00000622840.1_2	2,3,2
ENSG00000004487.16_4	chr1	23345936	23410182	+	5440	3274	3592	4475	3877	2894	2537	2076	2008	4091	3729	4669	3958	KDM1A	ENSG00000004487.16_4	6	ENST00000465864.2_3,ENST00000356634.7_1,ENST00000400181.8_1,ENST00000481879.1_1,ENST00000494920.1_2,ENST00000602503.1_1	19,19,21,3,6,1
ENSG00000240553.1_5	chr1	23346640	23414551	-	666	184	192	304	341	195	187	114	163	320	238	335	225	RP1-184J9.2	ENSG00000240553.1_5	1	ENST00000427154.1_1	2
ENSG00000263793.1	chr1	23370798	23370865	+	68	0	9	7	1	0	0	0	0	0	0	0	0	MIR3115	ENSG00000263793.1	1	ENST00000577915.1	1
ENSG00000266802.1	chr1	23384351	23384427	-	77	0	0	0	0	0	0	0	0	0	0	0	0	MIR4419A	ENSG00000266802.1	1	ENST00000583845.1	1
ENSG00000169641.13_4	chr1	23410516	23504301	-	9658	804	1041	1642	1224	912	841	475	618	1147	901	1227	1159	LUZP1	ENSG00000169641.13_4	5	ENST00000418342.5_2,ENST00000302291.8_2,ENST00000314174.5_2,ENST00000471849.5_1,ENST00000475164.2_1	4,5,3,4,4
ENSG00000229010.1_4	chr1	23466818	23467635	+	818	0	0	0	0	0	0	0	0	0	0	0	0	RP5-979D14.1	ENSG00000229010.1_4	1	ENST00000450968.1_1	1
ENSG00000206935.1	chr1	23489197	23489303	+	107	0	0	0	0	0	0	0	0	0	0	0	0	RNU6-514P	ENSG00000206935.1	1	ENST00000384208.1	1
ENSG00000252578.1	chr1	23490446	23490546	+	101	0	0	0	0	0	0	1	0	0	0	0	0	RNU6-135P	ENSG00000252578.1	1	ENST00000516769.1	1
ENSG00000179546.4_3	chr1	23518388	23521222	-	2835	16	41	32	9	56	69	24	24	96	58	55	33	HTR1D	ENSG00000179546.4_3	1	ENST00000374619.1_1	1
ENSG00000215381.3_4	chr1	23571258	23571717	+	460	0	9	1	0	0	0	0	0	0	0	0	0	RP5-1057J7.1	ENSG00000215381.3_4	1	ENST00000442089.1_1	1
ENSG00000261326.2_3	chr1	23607802	23613245	-	5444	175	263	354	293	180	191	128	116	318	381	205	273	RP5-1057J7.6	ENSG00000261326.2_3	2	ENST00000566551.1_1,ENST00000604481.1_1	1,2
ENSG00000284726.1_2	chr1	23624290	23629359	+	604	0	0	0	0	0	0	0	0	0	0	0	0	RP5-1057J7.8	ENSG00000284726.1_2	1	ENST00000641772.1_1	2
ENSG00000125944.19_3	chr1	23630264	23670829	-	8676	887	818	912	614	604	560	530	510	727	592	638	637	HNRNPR	ENSG00000125944.19_3	13	ENST00000464516.1_1,ENST00000641107.1_1,ENST00000478691.5_1,ENST00000374616.7_1,ENST00000476660.1_1,ENST00000374612.5_1,ENST00000302271.10_1,ENST00000606561.5_1,ENST00000427764.3_1,ENST00000463552.5_1,ENST00000470941.5_1,ENST00000476451.1_1,ENST00000490652.1_1	2,5,10,11,3,11,11,9,9,6,4,6,3
ENSG00000125945.14_2	chr1	23685941	23695935	-	4392	277	363	375	196	274	292	141	152	377	359	363	382	ZNF436	ENSG00000125945.14_2	2	ENST00000314011.8_1,ENST00000374608.3_1	4,3
ENSG00000249087.6_4	chr1	23695490	23698332	+	2655	135	119	145	122	83	36	54	32	100	61	82	55	C1orf213	ENSG00000249087.6_4	6	ENST00000458053.4_1,ENST00000454117.1_1,ENST00000335648.3_1,ENST00000518821.1_1,ENST00000437367.3_1,ENST00000518600.1_1	3,2,1,2,3,2
ENSG00000201405.1	chr1	23696747	23696839	+	93	51	69	40	29	25	19	29	2	32	18	29	24	Y_RNA	ENSG00000201405.1	1	ENST00000364535.1	1
ENSG00000271420.1_4	chr1	23704873	23705522	-	650	0	0	0	0	0	0	0	0	0	0	0	0	RP5-1057J7.7	ENSG00000271420.1_4	1	ENST00000605350.1_1	1
ENSG00000204219.9_2	chr1	23707554	23751233	-	3515	20	9	11	25	6	44	32	25	46	44	17	40	TCEA3	ENSG00000204219.9_2	6	ENST00000450454.6_1,ENST00000476978.1_1,ENST00000374601.7_1,ENST00000461794.1_1,ENST00000374602.2_1,ENST00000492271.1_1	11,3,6,5,4,2
ENSG00000232482.2_4	chr1	23737325	23738639	+	426	0	0	0	0	0	0	0	0	0	0	0	0	RP4-654C18.1	ENSG00000232482.2_4	1	ENST00000445848.2_1	3
ENSG00000088280.18_3	chr1	23755056	23811061	-	4988	350	438	423	371	306	299	206	254	392	463	488	530	ASAP3	ENSG00000088280.18_3	12	ENST00000495646.5_1,ENST00000336689.7_1,ENST00000618240.4_1,ENST00000465372.5_1,ENST00000492982.6_1,ENST00000437606.6_1,ENST00000484418.1_1,ENST00000475814.5_1,ENST00000530874.1_1,ENST00000478858.5_1,ENST00000608765.1_2,ENST00000449467.2_1	10,25,10,5,25,24,8,8,4,9,6,3
ENSG00000007968.6_2	chr1	23832922	23857712	-	5457	687	849	832	662	712	908	629	684	852	1290	1044	1216	E2F2	ENSG00000007968.6_2	2	ENST00000361729.2_1,ENST00000487237.1_1	7,2
ENSG00000235052.1_4	chr1	23875630	23877406	-	456	4	26	15	7	27	13	4	12	33	14	40	29	RP1-150O5.3	ENSG00000235052.1_4	1	ENST00000451217.1_1	2
ENSG00000117318.8_2	chr1	23884409	23886285	-	1797	4879	5653	5439	5047	4006	3426	2351	3071	5180	4550	5679	5839	ID3	ENSG00000117318.8_2	3	ENST00000374561.5_1,ENST00000463312.1_1,ENST00000486541.1_1	3,2,2
ENSG00000197880.8_4	chr1	23907985	23967058	+	2142	0	0	0	0	0	3	0	0	1	5	2	0	MDS2	ENSG00000197880.8_4	3	ENST00000477916.5_2,ENST00000374555.7_4,ENST00000612756.1_4	7,7,3
ENSG00000229239.2_4	chr1	23996784	24006749	+	1186	0	0	0	0	0	0	0	0	0	0	0	0	RP11-223J15.2	ENSG00000229239.2_4	1	ENST00000451300.2_1	7
ENSG00000142676.13_3	chr1	24018232	24023325	+	2659	604	756	737	624	559	541	402	398	629	529	870	681	RPL11	ENSG00000142676.13_3	6	ENST00000374550.8_3,ENST00000643754.1_1,ENST00000443624.6_2,ENST00000467075.2_2,ENST00000458455.2_3,ENST00000482370.2_2	6,6,5,6,5,4
ENSG00000203589.2	chr1	24032291	24033424	-	1134	0	0	0	0	0	0	0	0	0	0	0	0	RP5-886K2.1	ENSG00000203589.2	1	ENST00000366398.2	1
ENSG00000244609.2	chr1	24063100	24063380	-	281	0	0	0	0	0	0	0	0	0	0	0	0	RN7SL532P	ENSG00000244609.2	1	ENST00000466184.2	1
ENSG00000011007.12_3	chr1	24069645	24088549	+	5391	2381	2730	3272	2797	2340	2135	1713	1703	2866	2278	3462	3081	ELOA	ENSG00000011007.12_3	4	ENST00000418390.6_2,ENST00000613537.4_2,ENST00000609199.1_2,ENST00000487554.1_1	11,11,11,4
ENSG00000236810.5_4	chr1	24086872	24104777	-	1347	110	130	128	144	100	126	57	90	123	122	94	138	RP5-886K2.3	ENSG00000236810.5_4	2	ENST00000427796.5_1,ENST00000447961.1_1	4,3
ENSG00000057757.9_3	chr1	24104895	24114722	+	2186	166	129	97	114	112	91	104	63	179	141	121	172	PITHD1	ENSG00000057757.9_3	3	ENST00000246151.8_1,ENST00000415372.1_3,ENST00000374524.1_1	6,3,4
ENSG00000011009.10_2	chr1	24117460	24122029	+	2196	635	849	1219	914	672	518	354	444	763	784	616	778	LYPLA2	ENSG00000011009.10_2	10	ENST00000374514.7_1,ENST00000420982.5_1,ENST00000374505.6_1,ENST00000495365.5_1,ENST00000374503.7_1,ENST00000374502.7_1,ENST00000492577.1_1,ENST00000421070.1_1,ENST00000374501.1_1,ENST00000472213.1_1	10,8,7,9,10,8,9,6,6,3
ENSG00000117308.14_3	chr1	24122089	24127294	-	3978	112	129	141	164	126	133	46	85	78	82	97	91	GALE	ENSG00000117308.14_3	16	ENST00000481736.5_1,ENST00000617979.4_1,ENST00000374497.7_1,ENST00000456977.5_2,ENST00000459934.5_1,ENST00000469556.1_1,ENST00000429356.5_1,ENST00000418277.5_2,ENST00000470949.5_1,ENST00000425913.5_3,ENST00000445705.1_2,ENST00000467493.5_1,ENST00000486382.1_1,ENST00000470383.1_1,ENST00000466250.5_1,ENST00000467070.1_1	10,12,12,4,11,3,8,9,5,7,6,4,3,2,4,5
ENSG00000117305.14_3	chr1	24128375	24165110	-	5658	324	323	313	256	270	214	176	205	292	206	254	185	HMGCL	ENSG00000117305.14_3	9	ENST00000374490.7_1,ENST00000436439.6_1,ENST00000374487.6_1,ENST00000235958.4_3,ENST00000509389.5_1,ENST00000496907.1_1,ENST00000513148.1_1,ENST00000479458.1_1,ENST00000498698.1_1	9,7,10,5,6,5,6,2,2
ENSG00000179163.11_2	chr1	24171567	24194784	-	2047	597	687	854	760	547	431	525	437	555	712	529	575	FUCA1	ENSG00000179163.11_2	1	ENST00000374479.3_1	8
ENSG00000188822.7_3	chr1	24197016	24239852	-	5254	2	0	0	0	0	0	3	0	3	0	0	0	CNR2	ENSG00000188822.7_3	1	ENST00000374472.4_1	2
ENSG00000264347.1	chr1	24208284	24208575	-	292	0	0	0	0	0	0	0	0	0	0	0	0	RN7SL24P	ENSG00000264347.1	1	ENST00000580371.1	1
ENSG00000238538.1	chr1	24208745	24208842	+	98	0	0	0	0	0	0	0	0	0	0	0	0	snoU13	ENSG00000238538.1	1	ENST00000458849.1	1
ENSG00000229106.1_3	chr1	24227961	24229227	-	1267	0	0	0	0	0	0	0	0	0	0	0	0	RP11-4M23.2	ENSG00000229106.1_3	1	ENST00000412176.1_1	1
ENSG00000232557.3_4	chr1	24233601	24234375	+	210	0	0	0	0	0	0	0	0	0	0	0	0	RP11-4M23.3	ENSG00000232557.3_4	1	ENST00000411815.3_1	2
ENSG00000264926.1	chr1	24255560	24255637	+	78	0	0	0	0	0	0	0	0	0	0	0	0	MIR378F	ENSG00000264926.1	1	ENST00000578143.1	1
ENSG00000230228.2_4	chr1	24275506	24275873	-	368	0	0	0	0	0	0	0	0	0	0	0	0	RP11-4M23.4	ENSG00000230228.2_4	1	ENST00000421430.2_1	1
ENSG00000189266.11_3	chr1	24285599	24289952	+	2564	120	198	250	141	116	93	30	64	172	68	124	144	PNRC2	ENSG00000189266.11_3	4	ENST00000471915.5_1,ENST00000334351.7_1,ENST00000374468.1_1,ENST00000579103.1_1	3,3,3,2
ENSG00000188529.14_3	chr1	24291294	24307417	-	10277	1038	975	1230	932	870	575	478	585	1031	924	1507	909	SRSF10	ENSG00000188529.14_3	16	ENST00000344989.10_2,ENST00000453840.7_2,ENST00000341154.10_1,ENST00000484146.6_1,ENST00000473858.5_1,ENST00000374452.9_1,ENST00000374453.7_1,ENST00000343255.9_1,ENST00000492112.2_2,ENST00000485841.5_1,ENST00000338597.9_1,ENST00000495785.1_1,ENST00000473754.1_1,ENST00000497214.1_1,ENST00000485292.1_1,ENST00000469303.1_1	6,6,7,5,4,6,6,6,6,4,5,5,3,2,3,2
ENSG00000215905.4_4	chr1	24334371	24335009	-	328	0	0	0	0	0	0	0	0	0	0	0	0	RP11-4M23.7	ENSG00000215905.4_4	1	ENST00000442164.2_1	2
ENSG00000225315.2_5	chr1	24367325	24413289	+	454	5	0	0	0	2	0	0	0	0	1	0	0	RP11-293P20.2	ENSG00000225315.2_5	1	ENST00000439239.2_1	4
ENSG00000142661.18_2	chr1	24382525	24438665	-	9254	1	14	1	0	0	0	0	0	15	3	0	0	MYOM3	ENSG00000142661.18_2	4	ENST00000338909.9_1,ENST00000374434.3_1,ENST00000448831.1_1,ENST00000475306.1_1	10,37,2,14
ENSG00000230703.1_5	chr1	24393264	24410055	+	461	0	0	0	0	0	0	0	0	0	0	0	0	RP11-293P20.4	ENSG00000230703.1_5	1	ENST00000429191.1_1	3
ENSG00000142677.3_2	chr1	24446261	24469611	-	2798	6	11	4	10	0	2	0	0	2	1	3	20	IL22RA1	ENSG00000142677.3_2	1	ENST00000270800.1_1	7
ENSG00000185436.11_2	chr1	24480647	24514449	-	4923	408	429	750	648	448	331	263	354	532	470	482	555	IFNLR1	ENSG00000185436.11_2	5	ENST00000327535.5_1,ENST00000327575.6_1,ENST00000374421.7_1,ENST00000374419.1_1,ENST00000374418.3_1	7,6,7,6,4
ENSG00000230023.2_4	chr1	24526730	24538183	+	1849	0	1	6	1	3	5	0	0	0	3	1	1	RP11-10N16.2	ENSG00000230023.2_4	1	ENST00000439059.2_1	3
ENSG00000221032.3	chr1	24554407	24554520	+	114	0	0	0	0	0	0	0	0	0	0	0	0	AL590683.1	ENSG00000221032.3	1	ENST00000408105.3	1
ENSG00000266511.1	chr1	24606257	24606345	-	89	0	0	0	0	0	0	0	0	0	0	0	0	AL590683.2	ENSG00000266511.1	1	ENST00000584309.1	1
ENSG00000232298.2_4	chr1	24634046	24648391	-	856	13	24	27	54	17	26	9	18	15	35	60	47	RP11-10N16.3	ENSG00000232298.2_4	1	ENST00000437965.1_1	5
ENSG00000158055.15_2	chr1	24645812	24690972	+	3940	15	29	31	17	1	13	17	9	117	94	110	126	GRHL3	ENSG00000158055.15_2	9	ENST00000361548.8_1,ENST00000350501.9_1,ENST00000530984.1_1,ENST00000356046.6_1,ENST00000524724.5_1,ENST00000528064.5_1,ENST00000236255.4_1,ENST00000528181.1_1,ENST00000461318.1_1	16,16,3,16,4,15,16,3,3
ENSG00000001460.17_3	chr1	24683489	24743424	-	8511	920	1288	2211	1974	1135	946	673	809	1887	1564	1595	1736	STPG1	ENSG00000001460.17_3	12	ENST00000374409.5_1,ENST00000337248.8_1,ENST00000003583.12_1,ENST00000468303.5_1,ENST00000497384.1_1,ENST00000438866.1_2,ENST00000435187.1_2,ENST00000483261.1_1,ENST00000498488.5_1,ENST00000483528.1_1,ENST00000475760.1_1,ENST00000492753.1_1	9,9,8,10,6,4,3,2,3,4,2,2
ENSG00000001461.16_2	chr1	24742284	24799466	+	9404	797	1074	1614	1292	729	660	606	583	1345	1300	1176	1203	NIPAL3	ENSG00000001461.16_2	7	ENST00000374399.8_1,ENST00000003912.7_2,ENST00000488155.1_1,ENST00000358028.8_2,ENST00000339255.2_2,ENST00000475663.2_1,ENST00000432012.1_1	12,13,2,8,12,3,5
ENSG00000117602.11_2	chr1	24828841	24867530	+	7077	1005	815	994	858	735	640	549	583	1214	1045	1354	1065	RCAN3	ENSG00000117602.11_2	11	ENST00000618490.4_1,ENST00000538532.5_1,ENST00000436717.6_1,ENST00000616511.4_1,ENST00000374395.8_1,ENST00000425530.3_1,ENST00000610732.4_1,ENST00000412742.5_1,ENST00000630217.1_1,ENST00000374393.4_1,ENST00000482807.1_1	4,5,4,4,5,5,5,3,3,2,3
ENSG00000266551.1	chr1	24855945	24856204	-	260	0	0	0	0	0	0	0	0	0	0	0	0	RN7SL857P	ENSG00000266551.1	1	ENST00000580228.1	1
ENSG00000264443.1_4	chr1	24865292	24882515	-	1445	0	0	0	0	0	0	0	0	0	0	0	0	RP4-594I10.3	ENSG00000264443.1_4	1	ENST00000577528.1_1	3
ENSG00000184454.6_3	chr1	24882602	24935819	+	4122	0	1	0	0	0	0	0	0	0	12	20	0	NCMAP	ENSG00000184454.6_3	2	ENST00000374392.2_1,ENST00000486262.1_1	4,4
ENSG00000227312.2_4	chr1	24890118	24890465	+	348	0	0	0	0	0	0	0	0	0	0	0	0	RP11-496D1.2	ENSG00000227312.2_4	1	ENST00000443086.2_1	1
ENSG00000239106.1	chr1	24951902	24952004	-	103	0	0	0	0	0	0	0	0	0	0	0	0	Y_RNA	ENSG00000239106.1	1	ENST00000459380.1	1
ENSG00000133226.16_5	chr1	24958207	24999758	+	8168	7349	9338	12218	8578	8291	6689	5142	5607	8720	6097	8375	8833	SRRM1	ENSG00000133226.16_5	23	ENST00000471693.1_1,ENST00000478890.5_1,ENST00000593639.5_4,ENST00000323848.13_2,ENST00000466910.5_1,ENST00000468822.5_1,ENST00000600523.5_1,ENST00000462710.5_1,ENST00000374389.8_2,ENST00000490543.5_1,ENST00000479034.5_1,ENST00000447431.6_2,ENST00000596378.1_4,ENST00000494934.5_1,ENST00000495561.1_1,ENST00000485441.5_1,ENST00000470243.5_1,ENST00000496882.5_1,ENST00000461768.5_1,ENST00000485541.1_…	3,5,5,17,4,7,6,4,18,6,17,19,15,4,3,4,5,6,6,4,2,2,2
ENSG00000238986.1	chr1	24993474	24993578	-	105	0	0	0	0	0	0	0	0	0	0	0	0	snoU13	ENSG00000238986.1	1	ENST00000459464.1	1
ENSG00000284699.1_2	chr1	25031385	25044087	+	886	3	0	0	0	0	0	0	0	0	0	0	0	RP11-373M8.2	ENSG00000284699.1_2	1	ENST00000641176.1_1	4
ENSG00000169504.14_2	chr1	25071848	25170815	+	4495	1769	1958	3138	2571	1477	1464	1072	1115	1834	1625	2092	1800	CLIC4	ENSG00000169504.14_2	4	ENST00000374379.8_1,ENST00000497755.1_1,ENST00000488683.1_1,ENST00000489758.1_1	6,6,7,2
ENSG00000238482.1	chr1	25104364	25104470	-	107	0	0	0	0	0	0	0	0	0	0	0	0	RNU6-1208P	ENSG00000238482.1	1	ENST00000459588.1	1
ENSG00000020633.18_2	chr1	25226002	25291612	-	4523	81	134	128	124	71	61	27	37	106	89	140	171	RUNX3	ENSG00000020633.18_2	5	ENST00000399916.5_1,ENST00000308873.10_1,ENST00000338888.3_1,ENST00000496967.1_1,ENST00000479341.1_1	6,5,7,5,3
ENSG00000229162.1_4	chr1	25287836	25289588	+	820	0	0	0	0	0	0	0	0	0	0	0	0	RP11-84D1.1	ENSG00000229162.1_4	1	ENST00000456316.1_1	3
ENSG00000261025.1_4	chr1	25294914	25297356	-	2443	0	0	0	0	0	0	0	0	0	0	0	0	RP11-84D1.2	ENSG00000261025.1_4	1	ENST00000568143.1_1	1
ENSG00000264371.1	chr1	25349994	25350077	+	84	0	0	0	0	0	0	0	0	0	0	0	0	MIR4425	ENSG00000264371.1	1	ENST00000580572.1	1
ENSG00000233755.1_4	chr1	25370198	25439611	-	863	0	0	0	0	0	0	0	0	0	0	0	0	RP4-799D16.1	ENSG00000233755.1_4	2	ENST00000424084.1_1,ENST00000429666.1_1	3,2
ENSG00000233419.3_4	chr1	25451544	25451945	-	402	0	0	0	0	0	0	0	0	0	0	0	0	RP4-781L3.1	ENSG00000233419.3_4	1	ENST00000413189.1_1	1
ENSG00000231953.2_4	chr1	25534630	25535928	+	988	0	0	0	0	0	2	0	0	0	0	0	0	RP4-706G24.1	ENSG00000231953.2_4	1	ENST00000455902.2_1	2
ENSG00000117614.9_3	chr1	25549170	25558993	-	3370	39	25	44	47	28	33	38	37	51	22	68	50	SYF2	ENSG00000117614.9_3	4	ENST00000236273.8_2,ENST00000354361.3_2,ENST00000474160.1_1,ENST00000476231.1_1	7,6,2,2
ENSG00000284602.1_2	chr1	25559077	25561266	+	2190	55	157	214	155	77	96	57	61	85	80	175	120	RP3-465N24.7	ENSG00000284602.1_2	1	ENST00000641729.1_1	1
ENSG00000284657.1_2	chr1	25565985	25566744	+	760	4	1	0	0	0	0	0	0	0	0	1	2	RP3-465N24.8	ENSG00000284657.1_2	1	ENST00000641059.1_1	1
ENSG00000117616.17_4	chr1	25568728	25664704	-	6804	253	236	373	299	253	188	188	149	243	119	175	146	RSRP1	ENSG00000117616.17_4	22	ENST00000243189.11_1,ENST00000569495.5_1,ENST00000498238.1_1,ENST00000566395.5_1,ENST00000565733.5_1,ENST00000568254.5_1,ENST00000473314.6_1,ENST00000570063.5_1,ENST00000564223.5_1,ENST00000475766.2_1,ENST00000491378.1_1,ENST00000431849.3_1,ENST00000568212.1_1,ENST00000568701.1_3,ENST00000561867.1_2,ENST00000568996.1_2,ENST00000450820.2_1,ENST00000568399.1_1,ENST00000562018.1_1,ENST00000567741.1_…	5,3,4,5,5,5,6,4,3,6,2,3,3,2,2,2,2,2,3,3,2,2
ENSG00000272432.1_4	chr1	25574328	25574812	+	485	2	16	8	13	3	4	7	6	1	5	0	2	RP3-465N24.6	ENSG00000272432.1_4	1	ENST00000607698.1_1	1
ENSG00000261349.1_4	chr1	25592593	25593627	-	459	0	0	1	0	0	0	0	0	3	1	4	0	RP3-465N24.5	ENSG00000261349.1_4	1	ENST00000566714.1_1	2
ENSG00000187010.19_5	chr1	25598884	25656936	+	3313	0	0	3	5	0	0	0	0	0	0	0	0	RHD	ENSG00000187010.19_5	10	ENST00000564398.5_1,ENST00000328664.8_3,ENST00000622561.4_1,ENST00000454452.6_1,ENST00000423253.1_1,ENST00000417538.6_3,ENST00000357542.8_1,ENST00000568195.5_3,ENST00000342055.9_1,ENST00000423810.6_1	7,10,11,7,7,8,8,9,9,10
ENSG00000224183.1_3	chr1	25620655	25621134	-	480	0	0	0	0	0	0	0	0	0	0	0	0	RP11-335G20.1	ENSG00000224183.1_3	1	ENST00000414693.1_1	1
ENSG00000259984.1_4	chr1	25662920	25663956	-	459	48	30	44	16	27	30	25	25	38	78	61	19	RP11-335G20.7	ENSG00000259984.1_4	1	ENST00000570165.1_1	2
ENSG00000183726.10_2	chr1	25664408	25688852	+	3410	795	1029	1112	1023	758	819	516	582	903	843	1008	941	TMEM50A	ENSG00000183726.10_2	6	ENST00000374358.4_1,ENST00000498135.5_1,ENST00000491936.5_1,ENST00000480937.5_1,ENST00000468704.1_1,ENST00000487234.1_1	7,6,5,6,6,2
ENSG00000252515.1	chr1	25667462	25667525	+	64	0	0	0	0	0	0	0	0	0	0	0	0	RNU6-1171P	ENSG00000252515.1	1	ENST00000516706.1	1
ENSG00000238889.1	chr1	25672765	25672868	-	104	0	0	0	0	0	0	0	0	0	0	0	0	snoU13	ENSG00000238889.1	1	ENST00000459565.1	1
ENSG00000188672.18_4	chr1	25688740	25756683	-	2433	37	31	13	33	27	27	11	13	22	36	58	50	RHCE	ENSG00000188672.18_4	10	ENST00000294413.12_2,ENST00000340849.8_1,ENST00000349320.7_1,ENST00000527747.5_1,ENST00000346452.8_1,ENST00000349438.8_1,ENST00000413854.5_3,ENST00000527187.5_1,ENST00000533771.1_1,ENST00000495048.1_1	10,7,12,4,7,9,9,7,4,4
ENSG00000238084.4_4	chr1	25725212	25725689	+	478	0	0	0	3	0	0	0	0	1	0	0	0	RP3-469D22.1	ENSG00000238084.4_4	1	ENST00000419297.2_1	1
ENSG00000266468.1	chr1	25732722	25732780	+	59	0	0	0	0	0	0	0	0	0	0	0	0	AL031284.1	ENSG00000266468.1	1	ENST00000577655.1	1
ENSG00000204178.9_2	chr1	25757349	25826700	+	3979	562	608	800	730	497	358	286	427	617	303	698	577	TMEM57	ENSG00000204178.9_2	3	ENST00000399766.7_1,ENST00000374343.4_1,ENST00000470035.1_1	9,11,3
ENSG00000157978.11_2	chr1	25870071	25895377	+	5397	969	965	929	810	687	631	327	482	872	819	1007	1016	LDLRAP1	ENSG00000157978.11_2	7	ENST00000374338.4_1,ENST00000485476.2_1,ENST00000488127.1_1,ENST00000462394.1_1,ENST00000484476.5_1,ENST00000474283.1_1,ENST00000470950.1_1	9,3,7,2,4,3,3
ENSG00000225643.1_4	chr1	25907969	25916847	+	483	4	0	0	2	0	0	3	2	0	0	8	3	RP11-70P17.1	ENSG00000225643.1_4	1	ENST00000412797.1_1	2
ENSG00000117643.14_3	chr1	25943959	26112698	+	9026	272	265	231	253	210	145	133	64	150	108	112	81	MAN1C1	ENSG00000117643.14_3	8	ENST00000611903.4_1,ENST00000374332.8_2,ENST00000263979.7_2,ENST00000473891.1_1,ENST00000374329.1_1,ENST00000496532.5_1,ENST00000475314.5_1,ENST00000487493.1_1	14,12,13,5,11,4,5,3
ENSG00000233478.1_4	chr1	25971035	25985602	-	2224	0	0	0	0	0	0	0	0	0	0	0	0	RP1-187B23.1	ENSG00000233478.1_4	1	ENST00000436991.1_1	2
ENSG00000162430.16_4	chr1	26126667	26144715	+	4424	1808	2601	2586	1959	1540	1604	1402	1310	2066	2619	1647	2124	SEPN1	ENSG00000162430.16_4	5	ENST00000354177.8_1,ENST00000361547.6_1,ENST00000374315.1_1,ENST00000630065.2_1,ENST00000494537.1_1	13,13,12,4,5
ENSG00000255054.3_5	chr1	26137961	26150235	+	792	261	418	487	337	303	260	169	248	228	227	253	292	RP1-317E23.6	ENSG00000255054.3_5	2	ENST00000559265.1_1,ENST00000527604.1_1	3,4
ENSG00000228172.5_4	chr1	26143240	26147288	-	2793	116	233	284	168	82	178	70	50	119	175	143	133	RP1-317E23.3	ENSG00000228172.5_4	3	ENST00000442055.5_1,ENST00000453649.1_1,ENST00000536896.2_1	4,4,1
ENSG00000117640.17_3	chr1	26145131	26159433	+	5817	1219	1502	1584	1317	1202	853	702	931	872	711	900	1006	MTFR1L	ENSG00000117640.17_3	23	ENST00000424294.5_3,ENST00000374303.6_1,ENST00000533762.5_3,ENST00000529116.5_2,ENST00000474295.5_1,ENST00000488327.6_3,ENST00000472643.5_3,ENST00000494293.1_1,ENST00000469815.5_1,ENST00000526894.5_1,ENST00000478284.5_1,ENST00000524618.5_1,ENST00000374307.9_1,ENST00000528624.5_1,ENST00000525713.5_3,ENST00000374301.7_1,ENST00000464008.6_1,ENST00000526158.5_3,ENST00000530599.5_1,ENST00000374300.7_1…	6,7,6,5,7,4,5,2,4,6,7,7,7,5,5,7,7,6,6,7,6,4,3
ENSG00000272478.1_4	chr1	26158404	26158625	-	222	19	21	19	19	6	8	12	11	14	36	23	18	RP1-317E23.7	ENSG00000272478.1_4	1	ENST00000606617.1_1	1
ENSG00000127423.10_3	chr1	26158404	26185949	-	2408	479	615	831	702	394	435	352	338	724	605	726	824	AUNIP	ENSG00000127423.10_3	3	ENST00000538789.5_2,ENST00000481602.1_1,ENST00000374298.3_2	4,2,3
ENSG00000236528.1_4	chr1	26186104	26189911	+	849	0	1	2	0	3	5	6	0	0	5	2	9	RP1-125I3.2	ENSG00000236528.1_4	1	ENST00000455431.1_1	2
ENSG00000182749.5_3	chr1	26187701	26197744	-	3297	196	149	315	174	122	130	98	131	235	202	222	197	PAQR7	ENSG00000182749.5_3	1	ENST00000374296.3_1	2
ENSG00000207302.1	chr1	26203987	26204096	+	110	0	0	0	0	0	0	0	0	0	0	0	0	Y_RNA	ENSG00000207302.1	1	ENST00000384572.1	1
ENSG00000117632.22_3	chr1	26210672	26233482	-	6261	1224	1156	1199	886	990	910	965	633	974	1358	1083	907	STMN1	ENSG00000117632.22_3	9	ENST00000513116.1_1,ENST00000426559.6_1,ENST00000455785.6_1,ENST00000399728.5_1,ENST00000465604.1_1,ENST00000357865.6_1,ENST00000374291.5_1,ENST00000485226.1_1,ENST00000446334.1_3	2,5,5,5,4,5,5,2,4
ENSG00000229786.1_3	chr1	26213851	26214101	+	251	0	0	0	0	0	0	0	0	0	0	0	0	RP1-125I3.7	ENSG00000229786.1_3	1	ENST00000440710.1_1	1
ENSG00000223624.1_4	chr1	26215461	26215600	+	140	0	0	0	0	0	0	0	0	0	0	0	0	RP1-125I3.4	ENSG00000223624.1_4	1	ENST00000453780.1_1	1
ENSG00000264021.1	chr1	26232853	26232945	-	93	7	18	28	25	14	15	15	22	23	7	20	11	MIR3917	ENSG00000264021.1	1	ENST00000580971.1	1
ENSG00000266763.1	chr1	26238240	26238313	+	74	0	0	0	0	0	0	0	0	0	0	0	0	AL033528.1	ENSG00000266763.1	1	ENST00000584862.1	1
ENSG00000158006.13_2	chr1	26286258	26324648	-	3835	276	348	422	346	236	178	151	157	251	316	323	250	PAFAH2	ENSG00000158006.13_2	7	ENST00000374282.7_1,ENST00000374284.5_1,ENST00000493892.5_1,ENST00000464540.1_1,ENST00000476611.1_1,ENST00000439092.6_1,ENST00000441420.1_1	11,11,5,4,2,6,7
ENSG00000207237.1	chr1	26290688	26290791	+	104	0	0	0	0	0	0	0	0	0	0	0	0	RNU6-110P	ENSG00000207237.1	1	ENST00000384508.1	1
ENSG00000252190.1	chr1	26332497	26332621	+	125	0	0	0	0	0	0	0	0	0	0	0	0	SCARNA17	ENSG00000252190.1	1	ENST00000516381.1	1
ENSG00000252691.1	chr1	26332707	26332790	+	84	0	0	0	0	0	0	0	0	0	0	0	0	SCARNA18	ENSG00000252691.1	1	ENST00000516882.1	1
ENSG00000158008.9_2	chr1	26346375	26362955	+	4537	13	24	48	23	6	18	3	7	17	14	10	20	EXTL1	ENSG00000158008.9_2	4	ENST00000481377.5_1,ENST00000374280.3_1,ENST00000484339.1_1,ENST00000470037.1_1	6,11,4,3
ENSG00000158014.14_2	chr1	26363743	26372624	-	3498	0	0	0	0	0	0	0	0	0	0	0	0	SLC30A2	ENSG00000158014.14_2	3	ENST00000374278.7_1,ENST00000374276.3_1,ENST00000498060.1_1	7,8,3
ENSG00000284309.1_3	chr1	26373156	26375590	+	941	0	0	0	1	0	0	0	0	0	0	0	0	RP11-96L14.9	ENSG00000284309.1_3	1	ENST00000640097.1_1	2
ENSG00000158022.6_2	chr1	26377795	26394927	-	2573	0	0	0	0	0	0	0	0	0	0	0	0	TRIM63	ENSG00000158022.6_2	2	ENST00000374272.3_1,ENST00000483052.1_1	9,3
ENSG00000265320.1	chr1	26398069	26398168	+	100	0	0	0	0	0	0	0	0	0	0	0	0	AL391650.1	ENSG00000265320.1	1	ENST00000581535.1	1
ENSG00000175087.9_3	chr1	26437656	26452034	+	4535	120	52	88	56	82	74	53	29	135	108	211	129	PDIK1L	ENSG00000175087.9_3	4	ENST00000619836.4_1,ENST00000444713.5_2,ENST00000374271.8_1,ENST00000374269.1_1	3,3,4,3
ENSG00000197245.5_2	chr1	26485511	26490453	+	2858	3	11	15	3	0	17	1	4	17	11	2	6	FAM110D	ENSG00000197245.5_2	1	ENST00000374268.4_1	2
ENSG00000282872.1_4	chr1	26490652	26495072	-	761	0	0	0	3	0	0	0	0	0	2	0	0	RP11-96L14.8	ENSG00000282872.1_4	2	ENST00000634842.1_3,ENST00000635463.1_3	4,3
ENSG00000236782.6_4	chr1	26496007	26498312	-	1721	0	0	0	0	0	0	0	0	0	0	0	0	RP11-96L14.7	ENSG00000236782.6_4	5	ENST00000448923.2_1,ENST00000407889.6_1,ENST00000414762.1_1,ENST00000444682.1_1,ENST00000433939.6_1	3,4,2,2,4
ENSG00000142684.8_3	chr1	26496362	26497364	+	769	219	339	579	463	363	385	246	341	496	478	352	537	ZNF593	ENSG00000142684.8_3	2	ENST00000374266.6_2,ENST00000270812.6_2	3,2
ENSG00000142675.17_2	chr1	26503894	26516377	+	4043	41	23	14	22	8	4	22	15	47	15	21	31	CNKSR1	ENSG00000142675.17_2	14	ENST00000361530.10_1,ENST00000481077.6_1,ENST00000480348.6_1,ENST00000465415.1_1,ENST00000374253.9_1,ENST00000525687.5_1,ENST00000482227.5_1,ENST00000531191.5_1,ENST00000524529.6_1,ENST00000531150.5_1,ENST00000528001.1_1,ENST00000528281.5_1,ENST00000480617.1_1,ENST00000484874.2_1	21,9,7,3,21,13,21,20,4,7,9,11,3,4
ENSG00000188782.8_4	chr1	26517052	26529459	+	2030	7	0	0	0	0	0	0	0	7	0	1	0	CATSPER4	ENSG00000188782.8_4	3	ENST00000338855.6_2,ENST00000456354.6_2,ENST00000518899.5_1	9,10,10
ENSG00000236155.6_4	chr1	26536232	26556331	+	3191	3	0	0	0	0	0	0	0	0	0	2	0	RP11-231P20.2	ENSG00000236155.6_4	4	ENST00000428812.1_1,ENST00000447201.5_1,ENST00000448341.2_1,ENST00000451482.1_1	8,3,4,4
ENSG00000278572.1_4	chr1	26545072	26546967	-	899	0	0	0	0	0	0	0	0	0	0	0	0	RP11-231P20.6	ENSG00000278572.1_4	1	ENST00000622820.1_1	3
ENSG00000130695.14_3	chr1	26560644	26605529	+	5422	1353	1626	1660	1285	1158	976	881	867	1668	1298	1582	1623	CEP85	ENSG00000130695.14_3	9	ENST00000451429.6_2,ENST00000476272.6_2,ENST00000252992.8_2,ENST00000640292.1_2,ENST00000480446.1_1,ENST00000453146.1_1,ENST00000469609.5_1,ENST00000468163.1_1,ENST00000491670.1_1	13,15,14,13,2,10,7,2,3
ENSG00000270733.1_4	chr1	26589532	26589889	-	358	0	0	0	0	0	0	0	0	0	0	0	0	RP11-231P20.5	ENSG00000270733.1_4	1	ENST00000603670.1_1	1
ENSG00000142669.14_3	chr1	26605667	26608013	+	1786	476	683	1202	954	546	474	259	394	734	417	687	670	SH3BGRL3	ENSG00000142669.14_3	2	ENST00000270792.9_1,ENST00000319041.6_1	3,2
ENSG00000158062.20_4	chr1	26607819	26644854	-	4704	604	669	754	576	559	532	351	423	1098	1137	785	930	UBXN11	ENSG00000158062.20_4	16	ENST00000314675.11_3,ENST00000472155.5_1,ENST00000374223.5_1,ENST00000475591.5_1,ENST00000357089.8_1,ENST00000494942.5_1,ENST00000374221.7_1,ENST00000374217.6_1,ENST00000374222.5_1,ENST00000496466.1_1,ENST00000374215.5_1,ENST00000452980.5_1,ENST00000442942.6_2,ENST00000450041.5_1,ENST00000423664.5_1,ENST00000421827.2_1	11,14,12,13,14,10,16,15,16,10,10,8,7,7,9,7
ENSG00000169442.8_2	chr1	26644448	26647014	+	935	0	0	0	4	0	0	4	0	0	0	0	1	CD52	ENSG00000169442.8_2	3	ENST00000374213.2_1,ENST00000492808.5_1,ENST00000470468.1_1	2,2,3
ENSG00000176092.15_4	chr1	26648189	26686571	-	6895	8	45	13	24	8	24	10	12	36	15	1	36	CRYBG2	ENSG00000176092.15_4	11	ENST00000475866.3_2,ENST00000308182.9_2,ENST00000374211.5_1,ENST00000374208.1_1,ENST00000527815.6_2,ENST00000520372.5_1,ENST00000522923.5_1,ENST00000429942.2_1,ENST00000522993.1_1,ENST00000374207.4_1,ENST00000640960.1_2	22,20,4,4,18,4,6,9,6,7,3
ENSG00000225854.2_4	chr1	26653179	26653524	+	346	0	0	0	0	0	0	0	0	0	0	0	0	RP11-569G9.7	ENSG00000225854.2_4	1	ENST00000434718.2_1	1
ENSG00000265143.1	chr1	26674956	26675210	-	255	0	0	0	0	0	0	0	0	0	0	0	0	RN7SL490P	ENSG00000265143.1	1	ENST00000579210.1	1
ENSG00000176083.17_2	chr1	26688125	26701013	-	2379	1	0	0	0	0	0	0	0	0	0	0	0	ZNF683	ENSG00000176083.17_2	9	ENST00000403843.5_1,ENST00000436292.5_1,ENST00000349618.7_1,ENST00000455900.5_1,ENST00000451801.5_1,ENST00000454975.1_1,ENST00000453132.5_1,ENST00000423508.5_1,ENST00000416125.1_1	7,7,6,4,4,4,3,4,5
ENSG00000131914.10_2	chr1	26737269	26756213	+	4008	0	0	0	0	0	0	3	0	0	0	0	0	LIN28A	ENSG00000131914.10_2	2	ENST00000326279.10_1,ENST00000254231.4_1	4,5
ENSG00000117682.16_2	chr1	26758773	26797785	+	5596	637	772	1478	1149	674	626	368	399	778	640	900	952	DHDDS	ENSG00000117682.16_2	25	ENST00000434391.6_1,ENST00000427245.6_1,ENST00000527611.1_1,ENST00000374186.7_1,ENST00000525682.6_1,ENST00000236342.11_1,ENST00000526219.5_1,ENST00000374185.7_1,ENST00000487944.5_1,ENST00000360009.6_1,ENST00000533087.5_1,ENST00000531312.5_1,ENST00000525165.5_1,ENST00000525326.5_1,ENST00000525546.5_1,ENST00000528557.5_1,ENST00000526278.5_1,ENST00000436153.6_1,ENST00000529688.5_1,ENST00000530781.5_…	9,7,2,4,8,9,8,6,3,9,6,5,5,4,4,4,5,6,5,3,3,4,6,4,5
ENSG00000223583.1_4	chr1	26781144	26781678	-	535	0	2	0	0	0	0	0	0	0	9	3	5	RP3-476K8.4	ENSG00000223583.1_4	1	ENST00000446498.1_1	1
ENSG00000225891.1_4	chr1	26789247	26793773	-	529	17	6	17	19	23	6	7	0	6	17	18	18	RP3-476K8.3	ENSG00000225891.1_4	1	ENST00000423060.1_1	4
ENSG00000198830.10_2	chr1	26798941	26802463	+	2509	1753	2064	2049	1412	1806	2023	2163	1487	2067	3219	2192	1927	HMGN2	ENSG00000198830.10_2	10	ENST00000468388.5_1,ENST00000479815.5_1,ENST00000460563.5_1,ENST00000464888.5_1,ENST00000463817.5_1,ENST00000619352.4_1,ENST00000467700.5_1,ENST00000361427.5_1,ENST00000466194.1_1,ENST00000493418.1_1	4,4,5,5,6,7,6,6,5,2
ENSG00000224129.1_3	chr1	26845845	26846741	-	897	0	0	0	0	0	0	0	0	0	0	0	0	RP11-492M19.1	ENSG00000224129.1_3	1	ENST00000418220.1_1	1
ENSG00000117676.13_4	chr1	26856252	26901521	+	5884	369	494	480	524	342	280	248	240	459	441	501	601	RPS6KA1	ENSG00000117676.13_4	20	ENST00000525525.5_1,ENST00000526040.6_1,ENST00000374168.6_2,ENST00000524436.5_1,ENST00000374166.8_1,ENST00000526792.5_1,ENST00000529454.5_3,ENST00000530003.5_3,ENST00000366866.8_1,ENST00000531113.5_1,ENST00000374163.5_1,ENST00000530607.1_1,ENST00000531382.5_2,ENST00000525582.1_1,ENST00000527264.5_1,ENST00000474934.1_1,ENST00000488985.1_1,ENST00000403732.2_1,ENST00000530305.1_1,ENST00000438977.1_1	4,5,22,5,22,22,7,21,7,18,22,4,21,2,5,3,5,5,2,4
ENSG00000238705.1	chr1	26881033	26881084	+	52	0	0	0	0	0	0	0	0	0	0	0	0	MIR1976	ENSG00000238705.1	1	ENST00000459548.1	1
ENSG00000243905.2	chr1	26919737	26920037	-	301	0	0	0	0	0	0	0	0	0	0	0	0	RN7SL679P	ENSG00000243905.2	1	ENST00000497096.2	1
ENSG00000252802.1	chr1	26920431	26920532	-	102	0	0	0	0	0	0	0	0	0	0	0	0	Y_RNA	ENSG00000252802.1	1	ENST00000516993.1	1
ENSG00000229247.2_4	chr1	26966868	26967105	-	238	0	0	0	0	0	0	0	0	0	0	0	0	RP11-492M19.3	ENSG00000229247.2_4	1	ENST00000428860.2_1	1
ENSG00000238316.1	chr1	26968777	26968880	-	104	0	0	0	0	0	0	0	0	0	0	0	0	snoU13	ENSG00000238316.1	1	ENST00000459201.1	1
ENSG00000235069.2_4	chr1	26973938	26974172	+	235	0	0	0	0	0	0	0	0	0	0	0	0	RP4-785J1.1	ENSG00000235069.2_4	1	ENST00000443847.2_1	1
ENSG00000260063.1_4	chr1	27018623	27020622	-	2000	27	10	36	17	37	11	13	16	12	12	39	41	RP5-968P14.2	ENSG00000260063.1_4	1	ENST00000569378.1_1	1
ENSG00000117713.19_4	chr1	27019727	27108601	+	15928	3331	4081	4693	3496	2646	2621	2476	2121	3416	3793	3219	3276	ARID1A	ENSG00000117713.19_4	17	ENST00000430799.7_2,ENST00000637465.1_1,ENST00000324856.12_2,ENST00000457599.6_1,ENST00000524572.1_1,ENST00000374152.7_3,ENST00000615191.4_1,ENST00000636219.1_2,ENST00000636958.1_1,ENST00000636422.1_1,ENST00000430291.2_2,ENST00000636110.1_1,ENST00000636072.1_1,ENST00000466382.2_2,ENST00000636794.1_1,ENST00000532781.1_1,ENST00000637788.1_1	20,3,20,20,3,19,20,19,6,2,3,1,4,6,6,4,1
ENSG00000266138.1	chr1	27090115	27090393	+	279	1	0	0	3	0	0	0	0	0	0	0	0	RN7SL501P	ENSG00000266138.1	1	ENST00000578818.1	1
ENSG00000060642.10_3	chr1	27113963	27124889	+	3382	924	1148	960	759	728	675	406	462	891	814	876	678	PIGV	ENSG00000060642.10_3	6	ENST00000430292.5_1,ENST00000472757.5_1,ENST00000078527.8_1,ENST00000431541.5_1,ENST00000374145.5_1,ENST00000455364.1_3	3,5,4,3,4,3
ENSG00000241188.2	chr1	27141313	27141601	+	289	0	0	0	0	0	0	0	0	0	0	0	0	RN7SL165P	ENSG00000241188.2	1	ENST00000477476.2	1
ENSG00000204160.11_4	chr1	27153201	27184093	+	5436	723	829	1119	908	669	556	479	558	853	805	890	938	ZDHHC18	ENSG00000204160.11_4	5	ENST00000374142.8_3,ENST00000374141.6_3,ENST00000534643.5_4,ENST00000488397.3_1,ENST00000478902.1_1	8,8,6,7,2
ENSG00000175793.11_3	chr1	27189629	27190948	+	1320	4	38	40	22	23	20	3	13	75	86	213	128	SFN	ENSG00000175793.11_3	1	ENST00000339276.5_1	1
ENSG00000226698.1_4	chr1	27202624	27204736	+	306	0	0	0	0	0	0	0	0	0	0	0	0	RP1-50O24.6	ENSG00000226698.1_4	1	ENST00000448791.1_1	2
ENSG00000142751.14_2	chr1	27202624	27216788	-	4979	326	555	582	544	367	405	309	326	449	706	517	563	GPN2	ENSG00000142751.14_2	5	ENST00000374135.8_1,ENST00000374133.3_1,ENST00000477418.2_1,ENST00000431781.2_1,ENST00000461282.1_1	5,4,3,5,2
ENSG00000198746.12_3	chr1	27216979	27226957	-	2225	51	79	107	86	53	112	49	39	34	97	52	119	GPATCH3	ENSG00000198746.12_3	3	ENST00000445019.5_2,ENST00000361720.9_1,ENST00000450844.1_1	3,7,3
ENSG00000090273.13_3	chr1	27226729	27273353	+	2856	189	243	328	229	189	194	143	188	257	267	322	295	NUDC	ENSG00000090273.13_3	4	ENST00000435827.6_3,ENST00000321265.9_1,ENST00000452707.1_1,ENST00000484772.1_1	7,9,5,2
ENSG00000131910.4_2	chr1	27237980	27240457	-	1156	0	0	0	0	0	0	0	0	0	0	0	0	NR0B2	ENSG00000131910.4_2	1	ENST00000254227.3_1	2
ENSG00000175707.8_2	chr1	27276053	27286897	-	1793	1	0	0	0	0	0	0	0	0	0	0	4	KDF1	ENSG00000175707.8_2	2	ENST00000320567.5_1,ENST00000616918.1_1	4,5
ENSG00000172746.6_3	chr1	27306656	27307466	+	497	0	3	0	1	1	1	0	2	1	0	3	0	RP11-344H11.4	ENSG00000172746.6_3	1	ENST00000310055.5_1	2
ENSG00000224064.1_4	chr1	27310119	27310515	+	397	0	0	0	0	0	0	0	0	0	0	0	0	RP11-344H11.5	ENSG00000224064.1_4	1	ENST00000455684.1_1	1
ENSG00000225294.1_3	chr1	27312388	27312831	-	444	0	0	0	0	0	0	0	0	0	0	0	0	RP11-344H11.6	ENSG00000225294.1_3	1	ENST00000437956.1_1	1
ENSG00000253368.3_4	chr1	27320198	27327389	+	1976	168	239	345	242	135	183	112	96	267	296	220	225	TRNP1	ENSG00000253368.3_4	2	ENST00000522111.2_4,ENST00000531285.1_4	2,2
ENSG00000158246.7_2	chr1	27331511	27339327	-	2368	7	15	16	21	4	6	10	0	14	21	6	20	FAM46B	ENSG00000158246.7_2	1	ENST00000289166.5_1	2
ENSG00000090020.10_2	chr1	27425306	27493472	-	5974	379	528	852	759	472	334	291	257	656	696	543	564	SLC9A1	ENSG00000090020.10_2	6	ENST00000374089.5_1,ENST00000263980.7_1,ENST00000490329.1_1,ENST00000447808.1_1,ENST00000374086.3_1,ENST00000374084.2_1	7,12,2,6,5,4
ENSG00000229985.2_4	chr1	27503242	27503768	+	527	0	0	0	0	0	0	0	0	0	0	0	0	RP11-40H20.5	ENSG00000229985.2_4	1	ENST00000457038.1_1	1
ENSG00000214973.3_3	chr1	27527325	27527964	-	640	0	0	2	0	5	0	0	0	0	0	0	7	RP11-40H20.1	ENSG00000214973.3_3	1	ENST00000446783.1_1	1
ENSG00000225159.1_3	chr1	27533421	27534287	+	867	12	9	21	11	13	1	5	7	8	19	15	19	RP11-40H20.2	ENSG00000225159.1_3	1	ENST00000449818.1_1	1
ENSG00000225990.2_3	chr1	27537756	27537975	+	220	0	0	0	0	0	0	0	0	0	0	0	0	RP11-40H20.3	ENSG00000225990.2_3	1	ENST00000438350.2_1	1
ENSG00000224311.1_4	chr1	27555597	27560843	-	379	0	0	0	0	0	0	0	0	0	0	0	0	RP11-40H20.4	ENSG00000224311.1_4	1	ENST00000425205.1_1	3
ENSG00000142784.15_2	chr1	27561007	27635124	+	6024	559	735	794	666	623	478	419	436	425	490	494	513	WDTC1	ENSG00000142784.15_2	5	ENST00000319394.7_1,ENST00000361771.7_1,ENST00000447062.2_1,ENST00000491239.2_1,ENST00000472249.2_1	16,16,16,10,3
ENSG00000252098.1	chr1	27581955	27582058	-	104	0	0	0	0	0	0	0	0	0	0	0	0	Y_RNA	ENSG00000252098.1	1	ENST00000516289.1	1
ENSG00000243659.1_4	chr1	27637731	27638329	+	282	0	0	0	0	0	0	0	0	0	0	0	0	RP11-4K3__A.3	ENSG00000243659.1_4	1	ENST00000428741.2_1	2
ENSG00000186501.14_4	chr1	27648636	27662891	+	4476	403	573	638	625	410	348	212	257	474	343	375	402	TMEM222	ENSG00000186501.14_4	11	ENST00000611517.4_2,ENST00000374076.8_2,ENST00000464720.5_1,ENST00000608611.5_2,ENST00000466759.5_1,ENST00000486082.5_1,ENST00000464813.5_1,ENST00000478104.5_1,ENST00000498220.1_2,ENST00000471456.1_1,ENST00000470223.1_1	6,6,7,6,4,8,5,7,7,3,2
ENSG00000206888.1	chr1	27651710	27651816	+	107	8	8	12	3	11	2	4	0	4	23	17	14	RNU6-48P	ENSG00000206888.1	1	ENST00000384161.1	1
ENSG00000241547.1_3	chr1	27651820	27652287	+	468	39	87	54	63	85	37	44	47	67	68	47	77	RP11-4K3__A.5	ENSG00000241547.1_3	1	ENST00000486001.1_1	1
ENSG00000142765.17_4	chr1	27668511	27680428	+	5584	49	118	100	108	78	61	35	66	157	171	102	129	SYTL1	ENSG00000142765.17_4	11	ENST00000618673.4_1,ENST00000318074.9_3,ENST00000616558.4_3,ENST00000483926.5_1,ENST00000473280.1_3,ENST00000543823.1_3,ENST00000490170.5_1,ENST00000496001.5_1,ENST00000485269.1_1,ENST00000615284.1_1,ENST00000475199.1_1	14,15,15,13,3,14,8,6,5,4,2
ENSG00000142733.14_3	chr1	27681675	27693383	-	4951	202	213	289	317	172	206	99	138	215	237	233	280	MAP3K6	ENSG00000142733.14_3	8	ENST00000486046.5_1,ENST00000472410.5_1,ENST00000374040.7_2,ENST00000493901.5_2,ENST00000470890.1_1,ENST00000357582.2_2,ENST00000476509.1_1,ENST00000495230.1_1	3,20,28,30,5,29,2,2
ENSG00000142748.12_2	chr1	27695603	27701315	-	2167	0	0	0	0	0	0	0	0	0	0	0	0	FCN3	ENSG00000142748.12_2	4	ENST00000270879.8_1,ENST00000354982.2_1,ENST00000498393.1_1,ENST00000481748.1_1	8,7,3,2
ENSG00000174950.10_2	chr1	27705666	27709870	-	2039	1	0	5	3	0	6	1	0	29	35	15	18	CD164L2	ENSG00000174950.10_2	3	ENST00000374027.7_2,ENST00000374030.2_2,ENST00000374025.4_1	7,8,5
ENSG00000231207.1_4	chr1	27715972	27716649	+	355	0	0	0	0	0	0	0	0	0	0	0	0	RP1-144C9.2	ENSG00000231207.1_4	1	ENST00000443746.1_1	2
ENSG00000181773.6_2	chr1	27719148	27722318	+	2115	76	89	99	58	62	44	38	74	109	173	162	172	GPR3	ENSG00000181773.6_2	1	ENST00000374024.3_1	2
ENSG00000158195.10_2	chr1	27730730	27816669	-	5666	2825	3236	3072	2375	2497	2150	1791	1929	2964	2567	2577	2651	WASF2	ENSG00000158195.10_2	2	ENST00000618852.4_1,ENST00000536657.1_1	10,8
ENSG00000241169.1_4	chr1	27783709	27786093	+	428	0	0	0	0	0	0	0	0	0	0	0	0	RP4-752I6.1	ENSG00000241169.1_4	1	ENST00000492975.1_1	2
ENSG00000237429.1_4	chr1	27852316	27857072	+	283	30	29	51	47	11	29	31	24	24	37	59	58	RP1-159A19.4	ENSG00000237429.1_4	1	ENST00000443579.1_1	2
ENSG00000126705.14_3	chr1	27860546	27930942	-	8297	479	630	811	593	418	339	342	317	503	586	373	546	AHDC1	ENSG00000126705.14_3	16	ENST00000247087.10_2,ENST00000644989.1_1,ENST00000374011.6_1,ENST00000642416.1_1,ENST00000642245.1_1,ENST00000643308.1_1,ENST00000487743.3_2,ENST00000490295.2_2,ENST00000644833.1_1,ENST00000644550.1_1,ENST00000645669.1_1,ENST00000480033.3_2,ENST00000644119.1_1,ENST00000643219.1_1,ENST00000646921.1_1,ENST00000646642.1_1	6,6,7,7,9,9,5,4,2,3,4,4,4,5,4,3
ENSG00000000938.12_2	chr1	27938575	27961788	-	3474	0	0	0	1	0	3	0	0	0	0	1	3	FGR	ENSG00000000938.12_2	7	ENST00000374005.7_1,ENST00000399173.5_1,ENST00000374004.5_1,ENST00000374003.7_1,ENST00000457296.5_1,ENST00000475472.5_1,ENST00000468038.1_1	13,13,11,13,9,3,3
ENSG00000235912.1_4	chr1	27975930	27976121	+	192	0	0	0	0	0	0	0	0	0	0	0	0	RP1-159A19.3	ENSG00000235912.1_4	1	ENST00000433132.1_1	1
ENSG00000233975.1_4	chr1	27986839	27989233	-	441	0	0	0	0	0	0	0	2	0	0	0	0	RP11-288L9.1	ENSG00000233975.1_4	1	ENST00000440492.1_1	2
ENSG00000126709.14_2	chr1	27992572	27998729	-	865	52	56	126	99	53	50	13	46	37	88	77	45	IFI6	ENSG00000126709.14_2	3	ENST00000361157.10_1,ENST00000339145.8_1,ENST00000362020.4_1	5,5,5
ENSG00000225886.3_4	chr1	27995979	28029574	+	1651	0	0	0	1	0	0	0	0	1	0	0	12	RP11-288L9.4	ENSG00000225886.3_4	6	ENST00000430683.1_1,ENST00000626608.2_2,ENST00000628586.2_2,ENST00000625232.2_2,ENST00000628584.2_2,ENST00000629895.1_2	2,3,3,5,3,4
ENSG00000206767.1	chr1	28002114	28002220	-	107	0	0	0	0	0	0	0	0	0	0	0	0	RNU6-949P	ENSG00000206767.1	1	ENST00000384040.1	1
ENSG00000226662.2_3	chr1	28013321	28013982	-	662	0	0	0	0	0	0	0	0	0	0	0	0	RP11-288L9.3	ENSG00000226662.2_3	1	ENST00000445563.2_1	1
ENSG00000207095.1	chr1	28020242	28020346	+	105	0	0	0	0	0	0	0	4	0	0	0	0	RNU6-424P	ENSG00000207095.1	1	ENST00000384367.1	1
ENSG00000009780.15_4	chr1	28052490	28089633	+	4034	287	283	431	393	215	246	136	185	458	345	358	370	FAM76A	ENSG00000009780.15_4	7	ENST00000373954.10_2,ENST00000419687.6_1,ENST00000530324.5_2,ENST00000234549.11_1,ENST00000373949.5_1,ENST00000010299.10_1,ENST00000446647.1_1	9,7,8,9,8,10,4
ENSG00000231344.1_4	chr1	28065602	28065950	+	349	5	0	0	0	0	0	0	4	0	1	0	0	RP3-426I6.2	ENSG00000231344.1_4	1	ENST00000446554.1_1	1
ENSG00000230833.1_3	chr1	28066465	28067140	+	676	0	0	0	0	5	0	0	0	1	0	5	0	RP3-426I6.3	ENSG00000230833.1_3	1	ENST00000425462.1_1	1
ENSG00000117758.13_3	chr1	28099694	28150963	+	3846	614	585	1301	966	602	562	391	386	697	713	828	738	STX12	ENSG00000117758.13_3	5	ENST00000373943.8_1,ENST00000440806.2_1,ENST00000468761.1_1,ENST00000481874.1_1,ENST00000472285.1_1	9,7,4,2,3
ENSG00000269971.1_5	chr1	28100369	28100552	+	184	3	0	7	1	0	4	1	4	15	4	20	2	RP3-426I6.5	ENSG00000269971.1_5	1	ENST00000602607.1_1	1
ENSG00000270031.1_5	chr1	28146494	28146852	+	359	8	0	5	3	0	0	0	0	0	2	0	0	RP3-426I6.6	ENSG00000270031.1_5	1	ENST00000602843.1_1	1
ENSG00000223062.1	chr1	28151049	28151154	+	106	0	0	0	0	0	0	0	0	0	0	0	0	RNU6-1245P	ENSG00000223062.1	1	ENST00000411130.1	1
ENSG00000117751.17_3	chr1	28157289	28178187	+	2819	1241	1109	1402	1332	1169	1027	828	877	1567	1352	1633	1446	PPP1R8	ENSG00000117751.17_3	5	ENST00000311772.9_1,ENST00000236412.11_1,ENST00000373931.8_1,ENST00000431586.1_3,ENST00000486634.2_1	7,6,7,7,2
ENSG00000252947.1	chr1	28160912	28161077	+	166	0	3	0	9	2	5	0	3	0	0	0	3	SCARNA1	ENSG00000252947.1	1	ENST00000517138.1	1
ENSG00000268552.1	chr1	28177085	28177255	-	171	0	0	0	0	0	0	0	0	0	0	0	0	AL109927.1	ENSG00000268552.1	1	ENST00000601459.1	1
ENSG00000130775.15_2	chr1	28199054	28213196	+	4621	202	275	310	239	139	138	123	183	399	299	302	285	THEMIS2	ENSG00000130775.15_2	11	ENST00000328928.11_1,ENST00000373925.5_1,ENST00000373927.7_1,ENST00000427466.1_1,ENST00000442118.5_1,ENST00000467258.1_1,ENST00000373921.7_1,ENST00000466068.1_1,ENST00000482828.1_1,ENST00000456990.1_1,ENST00000492877.1_1	7,5,4,2,3,3,6,4,2,5,2
ENSG00000117748.9_2	chr1	28218035	28241257	-	2019	1409	1701	1696	1524	1289	1277	835	1028	1835	1754	2368	1863	RPA2	ENSG00000117748.9_2	5	ENST00000373912.7_1,ENST00000419958.5_1,ENST00000373909.7_1,ENST00000313433.11_1,ENST00000444045.1_1	9,5,9,8,6
ENSG00000130768.14_3	chr1	28261504	28285668	+	2670	211	276	391	352	239	242	108	179	253	321	447	273	SMPDL3B	ENSG00000130768.14_3	6	ENST00000373894.7_1,ENST00000548116.5_1,ENST00000411604.5_2,ENST00000373888.8_1,ENST00000466793.1_1,ENST00000549094.1_2	8,8,7,7,5,7
ENSG00000227050.1_4	chr1	28265386	28286704	-	491	0	0	3	4	0	2	0	0	0	0	3	8	RP11-460I13.2	ENSG00000227050.1_4	1	ENST00000448015.1_1	5
ENSG00000158156.7_2	chr1	28285973	28294607	+	2743	459	701	616	502	554	502	318	303	686	598	463	584	XKR8	ENSG00000158156.7_2	2	ENST00000373884.5_1,ENST00000481387.1_1	3,3
ENSG00000158161.15_4	chr1	28296855	28415207	-	6483	3681	4977	7129	6178	3719	3122	2613	2603	3667	2951	4252	4100	EYA3	ENSG00000158161.15_4	8	ENST00000373871.7_2,ENST00000540618.5_2,ENST00000436342.6_1,ENST00000373864.5_1,ENST00000373863.3_1,ENST00000495923.5_1,ENST00000471498.5_1,ENST00000468665.1_1	18,17,17,14,17,7,17,4
ENSG00000238231.2_4	chr1	28316669	28317035	-	367	51	36	80	46	14	53	35	39	42	46	40	29	RP11-460I13.6	ENSG00000238231.2_4	1	ENST00000426041.2_1	1
ENSG00000240750.2	chr1	28358397	28358691	-	295	1	3	0	2	1	1	4	0	0	0	9	0	RN7SL559P	ENSG00000240750.2	1	ENST00000476501.2	1
ENSG00000228589.3_3	chr1	28422253	28422933	-	681	0	3	0	0	0	0	0	0	0	2	0	0	RP5-1053E7.1	ENSG00000228589.3_3	1	ENST00000436160.1_1	1
ENSG00000228943.1_4	chr1	28436250	28436809	+	235	0	0	0	0	0	0	0	0	0	0	0	0	RP5-1053E7.2	ENSG00000228943.1_4	1	ENST00000443484.1_1	2
ENSG00000214812.3_4	chr1	28446960	28447832	-	557	0	0	0	0	1	0	0	0	0	0	0	1	RP5-1053E7.3	ENSG00000214812.3_4	1	ENST00000399029.3_1	2
ENSG00000253005.1	chr1	28469248	28469352	-	105	0	0	0	0	0	0	0	0	0	0	0	0	RNU6-176P	ENSG00000253005.1	1	ENST00000517196.1	1
ENSG00000252429.1	chr1	28470667	28470728	-	62	0	0	0	0	0	0	0	0	0	0	0	0	RNU7-29P	ENSG00000252429.1	1	ENST00000516620.1	1
ENSG00000169403.11_2	chr1	28473677	28520447	-	4706	1	17	19	24	5	15	1	6	46	92	55	51	PTAFR	ENSG00000169403.11_2	3	ENST00000373857.7_1,ENST00000539896.1_1,ENST00000305392.3_1	2,3,2
ENSG00000126698.10_2	chr1	28525967	28559536	-	2888	2512	3110	3341	2693	2423	2221	1918	2005	3253	2895	3334	3384	DNAJC8	ENSG00000126698.10_2	6	ENST00000603289.5_1,ENST00000263697.5_1,ENST00000489277.5_1,ENST00000470967.1_1,ENST00000482674.5_1,ENST00000488868.1_1	5,9,10,2,4,5
ENSG00000215902.1	chr1	28527013	28527152	-	66	711	878	964	773	788	730	508	629	846	687	1092	1029	AL353354.1	ENSG00000215902.1	1	ENST00000321830.5	2
ENSG00000269804.1	chr1	28527070	28527419	+	350	0	0	1	0	0	0	0	0	0	0	0	0	AL353354.2	ENSG00000269804.1	1	ENST00000596102.1	1
ENSG00000130770.17_2	chr1	28562620	28573417	+	2225	2815	3326	2538	2101	2067	1867	1546	1742	2663	1656	2466	2743	ATPIF1	ENSG00000130770.17_2	4	ENST00000497986.5_1,ENST00000335514.9_1,ENST00000468425.2_1,ENST00000465645.1_1	3,3,3,2
ENSG00000270605.1_4	chr1	28566020	28567964	-	1945	78	164	298	265	119	139	68	101	165	218	120	197	RP5-1092A3.4	ENSG00000270605.1_4	1	ENST00000604716.1_1	1
ENSG00000271398.1_4	chr1	28573655	28574079	+	425	1	0	0	5	0	0	0	0	0	1	1	0	RP5-1092A3.5	ENSG00000271398.1_4	1	ENST00000605846.1_1	1
ENSG00000130766.4_2	chr1	28586038	28609002	+	3453	1787	2567	3577	3500	1945	1790	1089	1387	3106	3529	3451	3446	SESN2	ENSG00000130766.4_2	1	ENST00000253063.3_1	10
ENSG00000130772.13_2	chr1	28655513	28662478	+	2019	49	57	57	42	34	41	4	9	64	68	20	68	MED18	ENSG00000130772.13_2	5	ENST00000479574.5_1,ENST00000373842.8_1,ENST00000398997.2_1,ENST00000475655.1_1,ENST00000474683.1_1	3,3,4,2,3
ENSG00000204138.12_3	chr1	28696093	28826881	+	7322	3011	3673	5339	3774	2946	2737	1747	2164	4075	3530	4355	4544	PHACTR4	ENSG00000204138.12_3	9	ENST00000633371.1_1,ENST00000373839.7_1,ENST00000632202.1_1,ENST00000632421.1_1,ENST00000463428.5_1,ENST00000493669.2_1,ENST00000633167.1_1,ENST00000373836.4_1,ENST00000632964.1_1	5,14,7,15,6,17,4,13,4
ENSG00000206779.1	chr1	28749066	28749166	-	101	0	0	0	0	0	0	0	0	0	0	0	0	Y_RNA	ENSG00000206779.1	1	ENST00000384052.1	1
ENSG00000229820.2_4	chr1	28780052	28780445	+	394	0	0	0	2	0	6	0	0	1	1	1	2	RP1-308E4.1	ENSG00000229820.2_4	1	ENST00000438601.2_1	1
ENSG00000221216.1	chr1	28807874	28807992	+	119	5	0	0	3	0	0	5	0	0	0	14	11	RNU6ATAC27P	ENSG00000221216.1	1	ENST00000408289.1	1
ENSG00000180198.15_3	chr1	28832455	28865812	+	3888	2452	2751	4040	3551	3261	2579	1941	2008	5262	4768	4924	4508	RCC1	ENSG00000180198.15_3	12	ENST00000398958.6_1,ENST00000427469.5_1,ENST00000434290.5_1,ENST00000373833.10_1,ENST00000419074.5_1,ENST00000373832.5_1,ENST00000373831.7_1,ENST00000411533.5_1,ENST00000486790.2_1,ENST00000430407.1_1,ENST00000429051.1_1,ENST00000478232.1_1	12,9,11,13,8,10,11,10,4,8,6,3
ENSG00000242125.3_4	chr1	28832492	28837404	+	4088	2800	3329	2826	2526	2350	2064	2094	1954	2901	3523	2749	3100	SNHG3	ENSG00000242125.3_4	3	ENST00000413987.1_2,ENST00000447507.1_1,ENST00000437681.1_2	3,2,2
ENSG00000200087.1	chr1	28835071	28835274	+	204	2182	3083	2239	2740	2083	1936	1756	1731	2311	3474	2647	2250	SNORA73B	ENSG00000200087.1	1	ENST00000363217.1	1
ENSG00000238821.1	chr1	28843988	28844087	+	100	53	46	181	159	79	93	63	45	227	229	176	134	snoU13	ENSG00000238821.1	1	ENST00000459072.1	1
ENSG00000231468.2_3	chr1	28852830	28853739	-	611	0	0	0	0	0	0	0	0	0	0	0	0	RP4-669K10.3	ENSG00000231468.2_3	1	ENST00000447051.2_1	2
ENSG00000279443.1_4	chr1	28870972	28873054	+	2083	14	3	38	21	11	24	6	9	46	70	107	57	RP4-669K10.8	ENSG00000279443.1_4	1	ENST00000624273.1_1	1
ENSG00000180098.9_2	chr1	28879597	28905057	+	4311	512	500	738	675	440	292	239	365	562	412	633	417	TRNAU1AP	ENSG00000180098.9_2	10	ENST00000373830.4_1,ENST00000495995.5_1,ENST00000411406.3_1,ENST00000480930.5_1,ENST00000491577.5_1,ENST00000464880.5_1,ENST00000497790.5_1,ENST00000495215.5_1,ENST00000464093.1_1,ENST00000484775.1_1	9,5,2,10,8,4,3,6,3,8
ENSG00000197989.13_4	chr1	28905050	28909495	-	3377	70	89	76	88	57	73	47	42	141	125	123	142	SNHG12	ENSG00000197989.13_4	12	ENST00000464612.5_1,ENST00000475441.5_1,ENST00000531126.5_1,ENST00000461448.5_1,ENST00000470977.5_1,ENST00000474814.1_1,ENST00000481368.5_1,ENST00000481220.5_1,ENST00000488745.5_1,ENST00000483436.5_1,ENST00000464115.1_1,ENST00000461832.1_1	4,5,6,4,5,3,4,5,6,6,3,3
ENSG00000221539.1	chr1	28905261	28905334	-	74	0	0	0	0	0	0	0	0	0	0	0	0	SNORD99	ENSG00000221539.1	1	ENST00000408612.1	1
ENSG00000120656.11_2	chr1	28915835	28969597	-	2337	288	262	374	373	238	240	181	181	270	223	327	278	TAF12	ENSG00000120656.11_2	4	ENST00000471683.5_1,ENST00000373824.8_1,ENST00000263974.4_1,ENST00000495422.1_1	5,6,6,5
ENSG00000188060.7_2	chr1	28918712	28921955	+	2200	0	0	1	0	0	0	1	1	0	0	0	0	RAB42	ENSG00000188060.7_2	2	ENST00000373826.3_2,ENST00000465518.2_2	2,2
ENSG00000229388.1_3	chr1	28969740	28975093	+	978	19	18	48	11	2	11	0	10	13	14	12	14	RP11-442N24__B.1	ENSG00000229388.1_3	2	ENST00000420776.1_1,ENST00000427804.1_1	2,2
ENSG00000270103.3_4	chr1	28975112	28975242	+	131	1	0	5	0	0	0	0	0	6	1	1	2	RNU11	ENSG00000270103.3_4	1	ENST00000602813.1_1	1
ENSG00000162419.12_2	chr1	28995244	29045865	+	6459	529	779	906	663	495	540	343	252	621	543	602	603	GMEB1	ENSG00000162419.12_2	4	ENST00000373816.5_1,ENST00000361872.8_1,ENST00000294409.2_1,ENST00000480454.1_1	10,10,10,9
ENSG00000252777.1	chr1	29016177	29016306	+	130	0	0	0	0	0	0	0	0	0	0	0	0	SCARNA24	ENSG00000252777.1	1	ENST00000516968.1	1
ENSG00000198492.15_4	chr1	29063133	29096287	+	3859	2171	2843	3546	3051	2336	2251	1771	1850	3527	2920	3638	3288	YTHDF2	ENSG00000198492.15_4	9	ENST00000474884.5_3,ENST00000542507.5_3,ENST00000373812.7_3,ENST00000541996.5_2,ENST00000478283.5_1,ENST00000496288.5_1,ENST00000475796.5_1,ENST00000476976.1_1,ENST00000468863.1_1	5,6,5,4,4,4,3,3,3
ENSG00000116329.10_2	chr1	29138654	29197779	+	9345	179	178	118	126	94	72	71	76	246	251	194	157	OPRD1	ENSG00000116329.10_2	2	ENST00000621425.1_1,ENST00000234961.6_1	4,3
ENSG00000226852.2	chr1	29194087	29197779	+	1747	8	4	4	4	4	3	3	0	12	12	0	8	RP1-212P9.2	ENSG00000226852.2	1	ENST00000443593.2	2
ENSG00000233427.1_4	chr1	29196995	29203848	-	1085	0	0	2	6	6	2	4	0	15	0	12	7	RP1-212P9.3	ENSG00000233427.1_4	1	ENST00000418471.1_1	3
ENSG00000199756.1	chr1	29208238	29208347	-	110	0	0	0	0	0	0	0	0	0	0	0	0	Y_RNA	ENSG00000199756.1	1	ENST00000362886.1	1
ENSG00000159023.20_4	chr1	29213603	29446558	+	14805	7300	8263	9429	8008	6979	5852	4311	4858	7998	6457	8522	7888	EPB41	ENSG00000159023.20_4	33	ENST00000642260.1_1,ENST00000647103.1_1,ENST00000343067.8_2,ENST00000356093.6_2,ENST00000646189.1_1,ENST00000644342.1_1,ENST00000646800.1_1,ENST00000482464.6_2,ENST00000642937.1_1,ENST00000373800.7_2,ENST00000643155.1_1,ENST00000347529.7_2,ENST00000646260.1_1,ENST00000373798.5_2,ENST00000644600.1_1,ENST00000643173.1_1,ENST00000644780.1_1,ENST00000643604.1_1,ENST00000373797.2_2,ENST00000349460.9_2…	21,18,21,19,15,16,19,14,21,19,21,17,13,21,18,17,17,18,15,20,13,16,11,17,13,10,9,7,5,3,6,5,2
ENSG00000225616.2_4	chr1	29308790	29309120	-	331	0	0	0	0	0	0	0	0	0	0	1	0	RP4-604A21.1	ENSG00000225616.2_4	1	ENST00000425821.2_1	1
ENSG00000206704.1	chr1	29312222	29312322	+	101	0	0	0	0	0	0	0	0	0	0	2	1	Y_RNA	ENSG00000206704.1	1	ENST00000383977.1	1
ENSG00000253304.1_2	chr1	29445940	29450447	-	2639	29	5	0	9	7	8	0	5	1	21	20	2	TMEM200B	ENSG00000253304.1_2	2	ENST00000521452.1_1,ENST00000420504.2_1	2,2
ENSG00000225750.1_4	chr1	29471006	29473506	-	279	0	0	1	0	3	0	3	0	0	2	0	7	RP11-242O24.3	ENSG00000225750.1_4	1	ENST00000413004.1_1	3
ENSG00000116350.16_4	chr1	29474255	29508499	-	8893	3157	2816	4006	2778	2542	2224	2184	1733	2880	2813	2929	2530	SRSF4	ENSG00000116350.16_4	8	ENST00000373795.6_2,ENST00000634348.1_1,ENST00000466448.4_2,ENST00000622143.1_1,ENST00000497015.5_1,ENST00000605204.1_1,ENST00000477193.1_1,ENST00000489898.1_2	6,7,5,2,3,8,2,3
ENSG00000227637.1	chr1	29479001	29479503	+	320	0	0	0	0	0	0	0	0	0	0	0	0	RP11-242O24.5	ENSG00000227637.1	1	ENST00000450108.1	2
ENSG00000116353.15_3	chr1	29519385	29557454	-	3922	684	747	774	781	599	546	381	489	784	641	637	661	MECR	ENSG00000116353.15_3	18	ENST00000373791.7_2,ENST00000475773.5_1,ENST00000483435.5_1,ENST00000263702.10_2,ENST00000473030.5_1,ENST00000463412.1_1,ENST00000453185.5_1,ENST00000478505.6_1,ENST00000490529.5_1,ENST00000464511.1_1,ENST00000463052.5_1,ENST00000489248.5_1,ENST00000475861.6_1,ENST00000474946.5_1,ENST00000464915.1_1,ENST00000482610.1_1,ENST00000484012.5_1,ENST00000493928.1_1	10,6,4,10,8,7,7,9,7,3,7,7,6,5,4,5,3,4
ENSG00000237934.1_4	chr1	29550445	29551328	+	573	0	0	0	0	0	0	0	0	0	0	0	0	RP11-467D18.2	ENSG00000237934.1_4	1	ENST00000427046.1_1	3
ENSG00000060656.19_3	chr1	29563028	29653325	+	6682	5993	7884	6335	6100	5966	4989	3259	4544	7022	5408	6052	7497	PTPRU	ENSG00000060656.19_3	11	ENST00000345512.7_3,ENST00000373779.7_3,ENST00000428026.6_3,ENST00000460170.2_3,ENST00000527027.1_1,ENST00000415600.6_1,ENST00000531385.1_1,ENST00000526080.1_1,ENST00000493601.5_1,ENST00000465525.6_1,ENST00000492954.1_1	31,30,30,31,3,14,4,3,5,5,4
ENSG00000221550.1	chr1	29580054	29580195	-	142	0	0	0	0	0	0	0	0	0	0	0	0	AL645859.1	ENSG00000221550.1	1	ENST00000408623.1	1
ENSG00000230523.1_3	chr1	29656132	29676626	-	2148	0	0	0	0	0	0	0	0	6	0	0	0	RP3-437I16.1	ENSG00000230523.1_3	1	ENST00000417651.1_1	3
ENSG00000266678.1	chr1	29758993	29759074	+	82	0	0	0	0	0	0	0	0	0	0	0	0	AL139151.1	ENSG00000266678.1	1	ENST00000580128.1	1
ENSG00000225011.4_4	chr1	29814705	29823405	-	349	0	0	0	0	0	0	0	0	0	0	0	0	RP11-810H18.1	ENSG00000225011.4_4	1	ENST00000515851.1_1	2
ENSG00000221126.1	chr1	30117392	30117525	-	134	0	0	0	0	0	0	0	0	0	0	0	0	AC092265.1	ENSG00000221126.1	1	ENST00000408199.1	1
ENSG00000228176.1_4	chr1	30181698	30182394	-	498	0	0	0	0	0	0	0	0	0	0	0	0	RP4-656G21.1	ENSG00000228176.1_4	1	ENST00000422638.1_1	2
ENSG00000284676.1_2	chr1	30228022	30263444	+	1953	1	0	0	0	0	0	0	0	0	0	0	0	RP11-179G8.2	ENSG00000284676.1_2	1	ENST00000641702.1_1	5
ENSG00000222787.1	chr1	30357749	30357852	+	104	0	0	0	0	0	0	0	0	0	0	0	0	AL645944.1	ENSG00000222787.1	1	ENST00000410855.1	1
ENSG00000270927.1_4	chr1	30377712	30378204	-	493	0	0	0	0	0	0	0	0	0	0	0	0	RP11-179G8.1	ENSG00000270927.1_4	1	ENST00000603857.1_1	1
ENSG00000233399.2_3	chr1	30486799	30510459	-	1519	0	0	0	0	0	0	0	0	0	0	0	0	RP11-111I12.1	ENSG00000233399.2_3	1	ENST00000445180.2_1	7
ENSG00000233372.1_4	chr1	30613110	30614454	+	551	0	0	0	0	0	0	0	0	0	0	0	0	RP5-893G23.1	ENSG00000233372.1_4	1	ENST00000441046.1_1	2
ENSG00000231251.1_4	chr1	30699370	30699462	+	93	0	0	0	0	0	0	0	0	0	0	0	0	RP3-357I16.1	ENSG00000231251.1_4	1	ENST00000442774.1_1	1
ENSG00000236335.1_4	chr1	30882407	30884485	-	507	0	0	0	0	0	0	0	0	0	0	0	0	RP4-591L5.1	ENSG00000236335.1_4	1	ENST00000427319.1_1	3
ENSG00000231949.1_4	chr1	30888672	30893955	+	481	0	0	0	0	0	0	0	0	0	0	0	0	RP4-591L5.2	ENSG00000231949.1_4	1	ENST00000420354.1_1	3
ENSG00000162510.5_2	chr1	31184124	31196434	-	4606	13	20	23	39	7	8	3	20	21	7	21	4	MATN1	ENSG00000162510.5_2	3	ENST00000373765.4_1,ENST00000494561.1_1,ENST00000477320.1_1	8,3,3
ENSG00000186056.9_4	chr1	31191351	31199674	+	4024	163	182	313	178	141	137	90	85	189	199	168	202	RP5-1166H10.2	ENSG00000186056.9_4	4	ENST00000414532.6_1,ENST00000454613.1_1,ENST00000414763.1_1,ENST00000443076.1_1	4,4,2,2
ENSG00000162511.7_2	chr1	31205316	31230667	-	3274	3	10	10	16	17	9	2	17	10	38	27	22	LAPTM5	ENSG00000162511.7_2	3	ENST00000294507.3_1,ENST00000464569.1_1,ENST00000476492.1_1	8,8,2
ENSG00000264773.1	chr1	31212003	31212079	-	77	0	0	0	0	0	0	0	0	0	0	0	0	MIR4420	ENSG00000264773.1	1	ENST00000583944.1	1
ENSG00000229607.1_4	chr1	31283225	31288400	-	444	0	3	0	0	0	0	0	0	0	0	0	0	RP5-1125N11.1	ENSG00000229607.1_4	1	ENST00000440358.1_1	2
ENSG00000223382.4_3	chr1	31297075	31307278	+	1646	3	1	0	7	1	0	0	0	7	0	3	0	RP5-1125N11.2	ENSG00000223382.4_3	9	ENST00000430320.3_1,ENST00000635357.1_1,ENST00000635044.1_1,ENST00000635288.1_1,ENST00000634319.1_1,ENST00000635009.1_1,ENST00000634587.1_1,ENST00000634980.1_1,ENST00000438790.1_1	4,3,4,5,5,4,4,5,3
ENSG00000222784.1	chr1	31316670	31316957	+	288	0	0	0	0	0	0	0	0	0	0	0	0	RN7SKP91	ENSG00000222784.1	1	ENST00000410852.1	1
ENSG00000235143.1_4	chr1	31331005	31333101	+	1747	0	0	0	0	0	0	0	0	0	0	0	0	RP1-65J11.5	ENSG00000235143.1_4	1	ENST00000431202.1_1	2
ENSG00000162512.15_4	chr1	31342314	31381608	-	7067	2806	3702	4021	3759	2488	2110	1561	1850	2955	2368	2469	2969	SDC3	ENSG00000162512.15_4	4	ENST00000336798.11_3,ENST00000339394.6_3,ENST00000471567.1_1,ENST00000487984.1_1	3,5,3,4
ENSG00000134644.15_3	chr1	31404353	31538838	-	6621	5571	5849	8566	6069	4837	4707	4404	3645	6566	6842	6743	5976	PUM1	ENSG00000134644.15_3	23	ENST00000424085.6_2,ENST00000257075.9_1,ENST00000373747.7_1,ENST00000525843.5_1,ENST00000426105.6_1,ENST00000498419.5_1,ENST00000440538.6_1,ENST00000373741.8_1,ENST00000373742.6_1,ENST00000530669.1_1,ENST00000529846.5_1,ENST00000525997.1_1,ENST00000527498.1_1,ENST00000498627.1_1,ENST00000471894.1_1,ENST00000490546.1_1,ENST00000532678.1_1,ENST00000526128.1_1,ENST00000526215.5_1,ENST00000525948.5_1…	18,22,22,21,22,17,22,22,20,5,6,6,5,2,4,5,6,4,5,7,7,3,2
ENSG00000200154.1	chr1	31408535	31408620	-	86	8	5	11	2	0	2	1	0	1	3	12	0	SNORD103A	ENSG00000200154.1	1	ENST00000363284.1	1
ENSG00000202107.1	chr1	31421964	31422049	-	86	6	22	19	7	8	13	9	1	10	13	13	14	SNORD103B	ENSG00000202107.1	1	ENST00000365237.1	1
ENSG00000200181.1	chr1	31441011	31441083	-	73	0	0	0	0	0	0	0	0	0	0	17	0	SNORD85	ENSG00000200181.1	1	ENST00000363311.1	1
ENSG00000237329.2_4	chr1	31509581	31510087	+	507	0	0	0	0	0	0	0	0	0	0	0	0	RP11-201O14.1	ENSG00000237329.2_4	1	ENST00000417263.2_1	1
ENSG00000232768.1_4	chr1	31523719	31523881	+	163	0	0	0	0	0	0	0	0	0	0	0	0	RP11-201O14.2	ENSG00000232768.1_4	1	ENST00000429616.1_2	1
ENSG00000215900.4_3	chr1	31567834	31568405	-	252	0	0	0	0	0	0	0	0	0	0	0	0	SEPW1P	ENSG00000215900.4_3	1	ENST00000322792.5_1	2
ENSG00000225142.2_4	chr1	31581035	31581470	-	436	0	0	0	0	0	0	0	0	0	0	0	0	RP11-490K7.1	ENSG00000225142.2_4	1	ENST00000441274.2_1	1
ENSG00000084628.9_2	chr1	31652592	31712401	-	2987	313	301	225	159	282	303	205	202	215	199	191	171	NKAIN1	ENSG00000084628.9_2	5	ENST00000373736.6_1,ENST00000528449.1_1,ENST00000526106.5_1,ENST00000530145.1_1,ENST00000533581.1_1	7,2,5,5,2
ENSG00000060688.12_3	chr1	31732415	31769629	-	3881	1110	1182	1349	1260	1078	930	742	765	1202	862	1446	1188	SNRNP40	ENSG00000060688.12_3	7	ENST00000263694.8_1,ENST00000486941.1_1,ENST00000489853.1_1,ENST00000373720.3_1,ENST00000491106.1_1,ENST00000474025.1_1,ENST00000463988.1_1	10,2,6,4,2,3,2
ENSG00000229447.2_4	chr1	31736092	31736528	-	437	3	5	4	5	3	13	0	8	0	6	10	2	RP11-490K7.4	ENSG00000229447.2_4	1	ENST00000452686.2_1	1
ENSG00000121766.15_4	chr1	31769829	31837800	+	1921	259	287	380	338	247	224	162	172	187	248	236	262	ZCCHC17	ENSG00000121766.15_4	9	ENST00000618216.4_1,ENST00000546109.5_2,ENST00000616393.4_1,ENST00000616859.4_1,ENST00000615916.4_1,ENST00000344147.9_2,ENST00000479629.5_1,ENST00000373714.5_2,ENST00000627541.1_1	7,9,7,7,7,8,8,8,7
ENSG00000229044.1_4	chr1	31805914	31819646	-	439	0	0	0	0	0	0	0	0	0	0	0	0	RP11-266K22.2	ENSG00000229044.1_4	1	ENST00000430143.1_1	3
ENSG00000121769.7_3	chr1	31838472	31849697	-	1026	0	7	6	0	0	7	0	0	7	4	0	4	FABP3	ENSG00000121769.7_3	4	ENST00000373713.6_2,ENST00000497275.5_1,ENST00000498148.5_1,ENST00000482018.1_3	4,3,5,6
ENSG00000168528.11_3	chr1	31882412	31907527	+	3549	735	951	1279	1088	791	728	396	539	626	522	686	813	SERINC2	ENSG00000168528.11_3	6	ENST00000373710.5_2,ENST00000536859.5_2,ENST00000487207.5_1,ENST00000373709.7_2,ENST00000491976.1_1,ENST00000536384.2_2	11,10,5,10,11,10
ENSG00000268950.1	chr1	31902192	31902614	-	423	0	0	0	0	0	0	0	0	0	0	0	0	AC114494.1	ENSG00000268950.1	1	ENST00000596131.1	1
ENSG00000215899.3_4	chr1	31960436	31961777	-	1342	0	0	0	0	0	0	0	0	0	0	0	0	RP11-439L8.2	ENSG00000215899.3_4	1	ENST00000401075.3_1	1
ENSG00000206981.1	chr1	31970419	31970525	-	107	0	0	0	0	0	0	0	1	1	0	0	0	RNU6-40P	ENSG00000206981.1	1	ENST00000384254.1	1
ENSG00000284543.1_2	chr1	31971827	32048907	+	9848	0	0	0	0	0	0	0	6	0	2	3	0	RP11-73M7.10	ENSG00000284543.1_2	9	ENST00000639839.1_1,ENST00000640226.1_1,ENST00000639741.1_1,ENST00000640157.1_1,ENST00000640623.1_1,ENST00000638644.1_1,ENST00000640630.1_1,ENST00000639946.1_1,ENST00000639047.1_1	5,4,3,3,3,5,2,3,1
ENSG00000228682.2	chr1	31971841	31974167	+	1166	0	0	0	0	0	0	0	0	0	0	0	0	RP11-439L8.3	ENSG00000228682.2	1	ENST00000418618.1	3
ENSG00000229167.1_4	chr1	32037186	32041174	-	591	0	0	0	8	0	0	1	4	15	15	5	3	RP11-73M7.1	ENSG00000229167.1_4	1	ENST00000435872.1_1	3
ENSG00000142910.15_2	chr1	32042086	32053287	+	5281	0	3	4	0	0	14	0	0	5	11	0	9	TINAGL1	ENSG00000142910.15_2	11	ENST00000457433.6_1,ENST00000271064.11_1,ENST00000461030.5_1,ENST00000466998.1_1,ENST00000478398.5_1,ENST00000481165.5_1,ENST00000468635.5_1,ENST00000537531.2_1,ENST00000498429.5_1,ENST00000463112.1_1,ENST00000480586.1_1	11,12,5,2,7,6,8,11,8,5,3
ENSG00000121764.11_2	chr1	32083287	32098119	+	2558	9	0	6	14	12	8	7	1	31	26	17	22	HCRTR1	ENSG00000121764.11_2	5	ENST00000485464.5_1,ENST00000468521.1_1,ENST00000403528.6_1,ENST00000373706.9_1,ENST00000373705.1_1	6,9,8,7,7
ENSG00000162517.12_2	chr1	32095463	32110497	-	2227	1359	1473	1702	1369	1591	1121	764	1118	1178	965	1461	1403	PEF1	ENSG00000162517.12_2	8	ENST00000373703.4_1,ENST00000461006.5_1,ENST00000478502.5_1,ENST00000489164.5_1,ENST00000492061.5_1,ENST00000496805.5_1,ENST00000472443.1_1,ENST00000471219.1_1	5,4,4,5,3,3,3,3
ENSG00000235790.7_5	chr1	32109650	32125763	+	2216	0	0	0	5	0	5	0	0	0	0	0	0	RP11-73M7.6	ENSG00000235790.7_5	24	ENST00000623791.3_2,ENST00000610043.5_2,ENST00000609625.5_2,ENST00000609549.5_2,ENST00000608332.5_2,ENST00000623425.3_2,ENST00000585660.5_1,ENST00000591592.5_1,ENST00000608246.5_2,ENST00000608888.5_2,ENST00000610216.5_2,ENST00000607926.5_2,ENST00000585413.5_1,ENST00000609033.5_2,ENST00000589462.5_3,ENST00000624388.3_2,ENST00000593188.5_1,ENST00000609373.5_2,ENST00000587445.5_3,ENST00000591929.5_3…	5,6,4,4,4,5,5,4,4,4,5,5,5,5,5,4,4,5,5,6,4,2,3,2
ENSG00000264078.1_5	chr1	32110295	32114972	+	480	0	0	0	4	0	3	0	0	0	0	0	4	RP11-73M7.9	ENSG00000264078.1_5	1	ENST00000581333.1_1	2
ENSG00000084636.17_3	chr1	32117848	32169920	-	9269	8	3	0	2	6	0	5	4	16	21	20	22	COL16A1	ENSG00000084636.17_3	17	ENST00000373672.7_1,ENST00000488128.6_1,ENST00000488897.5_1,ENST00000461217.1_1,ENST00000440437.1_1,ENST00000466829.5_1,ENST00000470799.5_1,ENST00000482910.1_1,ENST00000468459.5_1,ENST00000479100.1_1,ENST00000458715.5_1,ENST00000373668.7_1,ENST00000474000.5_1,ENST00000482478.5_1,ENST00000529928.1_1,ENST00000373667.4_1,ENST00000532877.1_1	71,23,15,4,13,4,10,10,9,9,13,41,11,11,7,17,4
ENSG00000121753.12_3	chr1	32192718	32230494	-	7756	2070	2873	1935	1892	1858	1788	1386	1281	1977	1902	1602	1457	ADGRB2	ENSG00000121753.12_3	15	ENST00000398556.7_2,ENST00000398547.5_2,ENST00000373655.6_2,ENST00000398542.5_1,ENST00000465256.5_1,ENST00000373658.7_2,ENST00000530999.1_1,ENST00000527361.5_2,ENST00000398538.5_2,ENST00000466109.1_1,ENST00000420125.5_3,ENST00000530134.5_1,ENST00000533175.1_2,ENST00000468430.1_1,ENST00000436464.1_2	29,29,33,28,10,33,9,30,29,3,14,8,6,3,3
ENSG00000266580.1	chr1	32224261	32224336	-	76	0	0	0	0	0	0	0	7	0	0	0	0	MIR4254	ENSG00000266580.1	1	ENST00000581063.1	1
ENSG00000254545.1_4	chr1	32254731	32256923	+	537	0	0	3	5	0	0	0	0	0	3	1	0	RP11-84A19.3	ENSG00000254545.1_4	1	ENST00000527035.1_1	2
ENSG00000134668.12_4	chr1	32256023	32281652	-	7085	29	45	163	136	56	83	36	40	212	234	157	124	SPOCD1	ENSG00000134668.12_4	14	ENST00000257100.7_1,ENST00000360482.6_1,ENST00000473361.5_1,ENST00000452755.6_3,ENST00000533231.5_1,ENST00000528579.1_1,ENST00000532604.5_1,ENST00000531039.5_1,ENST00000468720.5_1,ENST00000460061.5_1,ENST00000485944.5_1,ENST00000529396.1_1,ENST00000528791.5_1,ENST00000525930.1_1	15,16,6,9,15,5,3,6,3,2,7,5,6,3
ENSG00000203620.2_5	chr1	32307620	32321169	-	2257	0	0	0	0	0	0	0	0	0	0	0	0	RP11-84A19.2	ENSG00000203620.2_5	1	ENST00000453837.1_1	2
ENSG00000269967.1_5	chr1	32317514	32387442	-	587	0	0	0	0	0	0	0	0	6	0	0	0	RP11-84A19.4	ENSG00000269967.1_5	1	ENST00000602889.1_1	2
ENSG00000184007.19_4	chr1	32372022	32410457	-	6423	4169	4903	4819	3727	4132	4240	3185	2881	5321	5549	5950	5190	PTP4A2	ENSG00000184007.19_4	21	ENST00000602725.5_1,ENST00000647444.1_1,ENST00000457805.6_1,ENST00000489313.1_1,ENST00000602683.5_2,ENST00000470404.5_1,ENST00000532001.6_1,ENST00000528253.3_1,ENST00000627328.2_1,ENST00000626355.1_1,ENST00000484483.1_1,ENST00000468531.1_1,ENST00000534796.5_1,ENST00000532289.1_1,ENST00000526960.1_1,ENST00000524384.5_1,ENST00000528840.1_1,ENST00000494444.2_1,ENST00000529477.5_1,ENST00000533408.1_1…	5,6,4,2,4,4,7,5,3,3,2,3,3,2,2,3,2,3,3,3,5
ENSG00000212673.1	chr1	32379174	32380745	+	1572	0	0	0	0	0	0	0	0	0	0	0	0	AL136115.1	ENSG00000212673.1	1	ENST00000391369.1	1
ENSG00000228634.1_4	chr1	32398621	32399576	+	517	0	0	0	0	0	0	0	0	0	0	0	0	RP4-534N18.2	ENSG00000228634.1_4	1	ENST00000447478.1_1	2
ENSG00000284702.1_2	chr1	32437790	32452635	-	1873	0	2	0	0	0	0	0	0	1	0	0	0	RP4-534N18.4	ENSG00000284702.1_2	1	ENST00000641788.1_1	2
ENSG00000121774.17_2	chr1	32479430	32526451	+	3588	2208	2084	2790	1860	1983	1830	2084	1522	2405	3115	2665	2144	KHDRBS1	ENSG00000121774.17_2	4	ENST00000327300.11_1,ENST00000307714.12_1,ENST00000492989.1_1,ENST00000484270.2_1	9,9,8,11
ENSG00000203325.3_4	chr1	32517892	32539075	-	624	0	0	0	0	0	0	0	0	0	0	0	0	RP11-277A4.4	ENSG00000203325.3_4	1	ENST00000366152.3_1	3
ENSG00000121775.17_2	chr1	32537632	32568467	+	2820	1172	1477	2151	1515	1279	1204	758	969	1440	1205	1443	1591	TMEM39B	ENSG00000121775.17_2	9	ENST00000487305.5_1,ENST00000336294.9_1,ENST00000438825.5_1,ENST00000441402.5_1,ENST00000472503.5_1,ENST00000468135.5_1,ENST00000466321.5_1,ENST00000476968.5_1,ENST00000498613.1_1	9,9,5,7,6,10,6,11,5
ENSG00000266203.1	chr1	32552550	32552608	+	59	0	0	0	0	0	0	0	0	0	0	0	0	MIR5585	ENSG00000266203.1	1	ENST00000577515.1	1
ENSG00000025800.13_3	chr1	32573639	32642169	+	7480	8240	8891	13348	10960	8873	7795	6077	5820	12331	11098	13953	13084	KPNA6	ENSG00000025800.13_3	4	ENST00000373625.7_1,ENST00000471599.5_1,ENST00000469790.1_1,ENST00000446515.1_1	14,14,9,9
ENSG00000250135.1_5	chr1	32636334	32642169	+	667	399	372	583	436	339	354	217	257	507	428	557	504	RP4-622L5.2	ENSG00000250135.1_5	1	ENST00000515055.1_1	2
ENSG00000084652.15_2	chr1	32645287	32663886	+	5103	5454	5984	7088	6142	6123	5526	3903	3707	9904	8456	9609	9463	TXLNA	ENSG00000084652.15_2	2	ENST00000373610.7_1,ENST00000373609.1_1	11,10
ENSG00000160050.14_2	chr1	32665987	32670988	+	2818	186	238	307	360	191	182	119	178	193	169	204	294	CCDC28B	ENSG00000160050.14_2	5	ENST00000373602.9_1,ENST00000469003.5_1,ENST00000421922.6_1,ENST00000461819.5_1,ENST00000483009.1_1	6,3,5,6,4
ENSG00000224066.1_4	chr1	32670370	32672415	-	1357	20	48	138	96	23	28	31	42	93	81	75	119	RP4-622L5.7	ENSG00000224066.1_4	2	ENST00000373604.4_1,ENST00000421616.1_1	2,4
ENSG00000160051.11_3	chr1	32671262	32674288	+	2478	242	243	311	262	191	159	66	163	347	246	292	281	IQCC	ENSG00000160051.11_3	3	ENST00000291358.10_3,ENST00000617816.1_1,ENST00000537469.2_3	5,4,5
ENSG00000222046.2_2	chr1	32674695	32681797	+	1869	2	0	0	0	0	1	0	4	1	3	0	6	DCDC2B	ENSG00000222046.2_2	2	ENST00000409358.1_1,ENST00000487056.1_1	9,7
ENSG00000160055.19_2	chr1	32680073	32687960	-	3571	649	942	782	740	616	578	306	355	721	645	689	682	TMEM234	ENSG00000160055.19_2	12	ENST00000466796.1_1,ENST00000495091.5_1,ENST00000491434.5_1,ENST00000489170.5_1,ENST00000461402.5_1,ENST00000483001.5_1,ENST00000309777.10_1,ENST00000373593.5_1,ENST00000344461.7_1,ENST00000484490.1_1,ENST00000485689.1_1,ENST00000487174.1_1	4,2,11,10,9,7,5,4,6,3,2,5
ENSG00000084623.11_2	chr1	32687529	32697205	+	1725	1437	1657	2180	1623	1720	1356	972	1306	1959	1279	1541	2081	EIF3I	ENSG00000084623.11_2	6	ENST00000355082.9_1,ENST00000373586.1_1,ENST00000489353.5_1,ENST00000471486.5_1,ENST00000483517.5_1,ENST00000474371.1_1	6,11,6,7,6,7
ENSG00000220785.7_3	chr1	32697259	32707221	-	2961	0	4	14	5	0	1	1	0	0	11	14	0	MTMR9L	ENSG00000220785.7_3	4	ENST00000423995.5_1,ENST00000403496.6_1,ENST00000441044.5_1,ENST00000426597.2_1	6,4,9,10
ENSG00000183615.5_2	chr1	32712834	32714457	+	936	18	4	5	16	21	6	13	11	10	28	11	7	FAM167B	ENSG00000183615.5_2	1	ENST00000373582.3_1	2
ENSG00000182866.16_2	chr1	32716840	32751766	+	3339	0	0	0	0	11	0	3	0	1	0	0	0	LCK	ENSG00000182866.16_2	14	ENST00000373564.7_1,ENST00000336890.9_1,ENST00000482949.5_1,ENST00000495610.6_1,ENST00000355928.7_1,ENST00000476457.5_1,ENST00000469765.5_1,ENST00000619559.4_1,ENST00000461712.6_1,ENST00000373562.7_1,ENST00000477031.6_1,ENST00000373557.6_1,ENST00000333070.4_1,ENST00000469956.1_1	11,13,5,10,3,4,12,13,3,6,2,7,13,4
ENSG00000252450.1	chr1	32752053	32752162	-	110	0	0	0	0	0	0	0	0	0	0	0	0	Y_RNA	ENSG00000252450.1	1	ENST00000516641.1	1
ENSG00000116478.11_3	chr1	32757687	32799236	+	3963	2855	2623	3730	3217	2104	1879	1879	1535	2692	2266	2944	2437	HDAC1	ENSG00000116478.11_3	10	ENST00000373548.7_1,ENST00000481281.5_1,ENST00000463172.5_1,ENST00000428704.1_2,ENST00000472928.5_1,ENST00000490081.5_1,ENST00000482310.5_1,ENST00000476391.5_1,ENST00000484305.1_1,ENST00000471488.1_1	14,7,5,6,5,6,6,7,3,4
ENSG00000175130.6_2	chr1	32799433	32801980	-	1699	3906	4990	4817	3776	4203	3790	2777	3263	4065	3474	4729	4832	MARCKSL1	ENSG00000175130.6_2	1	ENST00000329421.7_1	2
ENSG00000233775.1_4	chr1	32814795	32816264	-	687	0	9	21	1	7	3	0	0	0	0	2	0	RP4-811H24.9	ENSG00000233775.1_4	1	ENST00000448134.1_1	2
ENSG00000162526.6_2	chr1	32817122	32829913	+	2191	275	336	344	307	199	249	121	143	189	208	269	277	TSSK3	ENSG00000162526.6_2	4	ENST00000421153.2_1,ENST00000574792.1_1,ENST00000574315.1_1,ENST00000373534.3_1	3,2,2,2
ENSG00000225828.1_4	chr1	32826871	32829879	-	2845	1379	2021	3732	3148	1234	1211	857	733	1292	1390	1365	1566	FAM229A	ENSG00000225828.1_4	4	ENST00000432622.1_2,ENST00000416512.1_1,ENST00000428500.1_4,ENST00000415596.1_1	3,2,2,3
ENSG00000160058.18_2	chr1	32830704	32860332	-	6271	2180	2217	3662	3111	1777	1501	1086	1277	2039	1686	2306	2145	BSDC1	ENSG00000160058.18_2	16	ENST00000455895.6_1,ENST00000444377.5_1,ENST00000341071.11_1,ENST00000526031.5_1,ENST00000419121.6_1,ENST00000446293.6_1,ENST00000463967.1_1,ENST00000373520.8_1,ENST00000527513.5_1,ENST00000527163.5_1,ENST00000530485.1_1,ENST00000474414.5_1,ENST00000530876.5_1,ENST00000530753.1_1,ENST00000533084.1_1,ENST00000531222.1_1	11,12,10,9,10,11,2,10,7,8,6,5,3,3,3,2
ENSG00000224333.1_3	chr1	32867710	32868716	-	1007	0	0	0	0	0	0	0	0	0	0	0	0	RP11-395N6.1	ENSG00000224333.1_3	1	ENST00000444107.1_1	1
ENSG00000270850.1_4	chr1	32887580	32887920	+	341	0	0	0	0	0	0	0	0	5	9	0	0	RP11-395N6.4	ENSG00000270850.1_4	1	ENST00000604085.1_1	1
ENSG00000229259.1_3	chr1	32888815	32892390	-	1801	0	0	0	0	0	0	0	0	0	0	1	0	RP11-395N6.2	ENSG00000229259.1_3	1	ENST00000454917.1_1	4
ENSG00000263529.1	chr1	32923436	32923733	+	298	0	0	0	0	0	0	0	0	0	0	0	0	RN7SL122P	ENSG00000263529.1	1	ENST00000579362.1	1
ENSG00000254553.1_5	chr1	32930658	33066393	+	3447	304	512	322	413	352	260	213	250	611	430	457	605	RP1-27O5.3	ENSG00000254553.1_5	1	ENST00000480336.1_1	10
ENSG00000273274.1_3	chr1	32930670	32962287	+	12834	171	273	210	261	251	82	104	169	211	179	200	140	ZBTB8B	ENSG00000273274.1_3	1	ENST00000609129.1_1	4
ENSG00000160062.14_3	chr1	33005028	33071540	+	7075	357	500	345	362	358	327	273	286	711	589	612	788	ZBTB8A	ENSG00000160062.14_3	2	ENST00000373510.8_1,ENST00000316459.4_1	5,5
ENSG00000176261.15_4	chr1	33065773	33116504	-	3531	329	285	489	385	305	255	199	193	316	325	298	250	ZBTB8OS	ENSG00000176261.15_4	15	ENST00000341885.5_1,ENST00000468695.5_1,ENST00000492007.5_1,ENST00000373506.7_1,ENST00000467652.5_1,ENST00000498691.5_2,ENST00000373501.6_2,ENST00000473294.6_1,ENST00000436661.5_2,ENST00000476493.5_2,ENST00000465588.2_1,ENST00000483138.5_1,ENST00000479075.5_1,ENST00000473383.1_1,ENST00000466361.1_1	2,7,4,6,3,6,7,7,6,7,6,6,4,3,2
ENSG00000200591.1	chr1	33105552	33105653	+	102	0	0	0	0	0	0	0	0	0	0	0	0	Y_RNA	ENSG00000200591.1	1	ENST00000363721.1	1
ENSG00000162521.18_4	chr1	33116743	33151812	+	9470	10521	11923	12567	9805	10187	8128	5677	7219	10253	6102	11368	10807	RBBP4	ENSG00000162521.18_4	19	ENST00000414241.7_1,ENST00000373493.9_1,ENST00000527118.5_1,ENST00000401893.7_1,ENST00000524393.5_1,ENST00000526193.5_1,ENST00000492348.6_1,ENST00000525506.1_1,ENST00000465780.1_1,ENST00000373485.5_3,ENST00000477563.6_1,ENST00000458695.6_1,ENST00000490500.5_3,ENST00000445722.2_3,ENST00000475321.5_1,ENST00000531983.1_1,ENST00000463378.5_2,ENST00000460669.5_2,ENST00000482190.1_2	12,12,5,4,5,5,10,3,2,12,5,12,3,4,7,3,8,8,7
ENSG00000162520.14_3	chr1	33145961	33169197	-	3487	29	30	24	27	28	18	0	8	33	20	24	46	SYNC	ENSG00000162520.14_3	4	ENST00000409190.7_1,ENST00000373484.4_1,ENST00000417633.1_2,ENST00000426909.1_2	5,4,2,2
ENSG00000224409.1_4	chr1	33183335	33190838	-	395	0	0	0	0	0	0	0	0	0	0	0	0	RP11-114B7.6	ENSG00000224409.1_4	1	ENST00000421619.1_1	2
ENSG00000162522.10_2	chr1	33207486	33240571	+	5965	713	1112	1281	893	823	724	549	605	944	981	926	932	KIAA1522	ENSG00000162522.10_2	5	ENST00000401073.6_1,ENST00000468130.1_1,ENST00000373481.7_1,ENST00000294521.7_1,ENST00000373480.1_1	7,4,7,5,7
ENSG00000134684.10_2	chr1	33240838	33283754	-	8212	2827	3048	3504	2904	2943	2249	2024	2087	3756	3086	3354	3397	YARS	ENSG00000134684.10_2	10	ENST00000469100.5_1,ENST00000373477.8_1,ENST00000490826.1_1,ENST00000487404.5_1,ENST00000478828.1_1,ENST00000616261.1_1,ENST00000481895.5_1,ENST00000466052.1_1,ENST00000470377.1_1,ENST00000472692.1_1	4,13,2,5,6,12,9,4,3,2
ENSG00000116497.17_3	chr1	33282368	33324480	+	9194	1704	1859	2711	2274	1626	1420	1403	1047	2402	2249	2406	2133	S100PBP	ENSG00000116497.17_3	16	ENST00000530710.5_3,ENST00000373476.5_1,ENST00000373475.9_1,ENST00000529027.5_1,ENST00000531123.5_1,ENST00000356689.7_1,ENST00000526230.1_1,ENST00000531256.1_1,ENST00000477248.1_1,ENST00000482212.1_3,ENST00000474103.1_1,ENST00000530552.1_3,ENST00000525203.5_1,ENST00000524535.5_1,ENST00000527692.1_1,ENST00000475486.1_1	3,7,7,4,7,7,3,2,2,3,2,2,4,3,3,2
ENSG00000160097.16_3	chr1	33327869	33338083	-	3139	26	25	26	51	29	23	5	19	97	115	146	95	FNDC5	ENSG00000160097.16_3	7	ENST00000483143.1_1,ENST00000481487.1_1,ENST00000373471.7_3,ENST00000497068.1_1,ENST00000640867.1_2,ENST00000496770.1_2,ENST00000465346.1_1	2,2,6,2,6,5,2
ENSG00000121905.9_2	chr1	33351595	33364042	+	1991	25	39	5	9	13	13	8	12	54	20	20	53	HPCA	ENSG00000121905.9_2	5	ENST00000470166.5_1,ENST00000480118.5_1,ENST00000373467.3_1,ENST00000459874.5_1,ENST00000470896.1_1	3,3,4,3,2
ENSG00000121900.18_2	chr1	33360195	33367039	-	1417	382	556	445	381	531	445	445	356	555	543	434	523	TMEM54	ENSG00000121900.18_2	6	ENST00000482771.1_1,ENST00000373463.7_1,ENST00000329151.5_1,ENST00000474144.5_1,ENST00000475208.5_1,ENST00000463914.1_1	2,6,5,6,5,5
ENSG00000221423.1	chr1	33391895	33392000	+	106	0	0	0	0	0	0	0	0	0	0	0	0	AL031602.1	ENSG00000221423.1	1	ENST00000408496.1	1
ENSG00000116514.16_3	chr1	33402046	33430286	-	2610	964	1136	1253	1024	1047	883	596	610	1828	1379	1666	1656	RNF19B	ENSG00000116514.16_3	3	ENST00000373456.11_1,ENST00000356990.9_3,ENST00000235150.4_1	9,9,9
ENSG00000278966.2_4	chr1	33439154	33440064	+	911	5	10	0	0	0	0	0	0	0	0	1	0	RP5-1174N9.2	ENSG00000278966.2_4	2	ENST00000633169.1_1,ENST00000623226.1_1	1,1
ENSG00000267885.1	chr1	33439268	33439642	+	375	5	10	0	0	0	0	0	0	0	0	1	0	FKSG48	ENSG00000267885.1	1	ENST00000594612.1	1
ENSG00000217644.5_4	chr1	33445548	33446073	+	526	0	0	0	0	0	0	0	0	0	0	0	0	RP4-803A2.1	ENSG00000217644.5_4	1	ENST00000401937.3_1	1
ENSG00000239670.1_4	chr1	33452553	33453834	+	863	0	0	0	0	0	0	0	0	5	0	0	0	RP4-803A2.2	ENSG00000239670.1_4	1	ENST00000447420.1_1	2
ENSG00000236065.2_5	chr1	33452676	33498070	+	1680	0	0	0	0	0	0	0	0	0	0	0	0	RP1-117O3.2	ENSG00000236065.2_5	1	ENST00000427524.1_1	2
ENSG00000004455.16_2	chr1	33473541	33546597	-	5727	7343	8793	10365	8622	7437	6174	5253	5892	8831	8133	9268	9522	AK2	ENSG00000004455.16_2	15	ENST00000629371.2_2,ENST00000373449.6_1,ENST00000548033.5_2,ENST00000482191.1_1,ENST00000491241.1_1,ENST00000467905.5_2,ENST00000480134.5_2,ENST00000354858.10_1,ENST00000550338.5_1,ENST00000469238.1_1,ENST00000466029.1_1,ENST00000487289.1_1,ENST00000548559.1_1,ENST00000551979.1_1,ENST00000626911.1_1	6,7,6,2,4,8,5,6,7,3,2,5,5,2,2
ENSG00000142920.16_2	chr1	33546705	33586131	+	6559	324	431	585	431	273	237	167	181	336	259	365	381	AZIN2	ENSG00000142920.16_2	19	ENST00000478635.5_1,ENST00000294517.10_1,ENST00000481886.5_1,ENST00000475935.5_1,ENST00000462920.5_1,ENST00000471119.5_1,ENST00000495135.5_1,ENST00000477570.5_1,ENST00000483027.5_1,ENST00000492420.5_1,ENST00000373443.7_1,ENST00000497710.5_1,ENST00000473089.5_1,ENST00000484656.5_1,ENST00000373440.5_1,ENST00000373441.1_1,ENST00000478204.5_1,ENST00000497280.1_1,ENST00000492521.1_1	5,12,9,10,4,8,3,6,5,6,11,6,5,7,5,9,8,2,2
ENSG00000278997.1_4	chr1	33607472	33608831	-	1360	5	6	46	30	0	2	3	2	3	0	0	3	RP11-131M11.2	ENSG00000278997.1_4	1	ENST00000622988.1_1	1
ENSG00000116525.13_2	chr1	33611003	33647660	-	3646	186	219	284	320	136	128	142	107	205	120	126	132	TRIM62	ENSG00000116525.13_2	4	ENST00000291416.9_1,ENST00000543586.1_2,ENST00000485148.1_1,ENST00000486583.1_1	5,5,4,2
ENSG00000279179.1_4	chr1	33628452	33631899	+	3448	6	19	16	6	16	6	1	0	34	1	5	14	RP11-131M11.3	ENSG00000279179.1_4	1	ENST00000624339.1_1	1
ENSG00000284721.1_2	chr1	33660389	33665954	+	1947	2	0	0	0	0	0	0	0	0	0	2	0	RP11-131M11.4	ENSG00000284721.1_2	2	ENST00000641271.1_1,ENST00000641727.1_1	2,2
ENSG00000160094.14_3	chr1	33722146	33766320	+	3331	1743	2445	1547	1178	1276	1062	925	1135	2386	1872	2030	2377	ZNF362	ENSG00000160094.14_3	5	ENST00000483388.5_2,ENST00000539719.5_1,ENST00000490959.2_1,ENST00000373428.5_1,ENST00000477934.1_1	4,9,3,8,2
ENSG00000270115.1_5	chr1	33726813	33727281	+	469	19	21	21	23	26	20	14	7	40	37	36	24	RP11-415J8.7	ENSG00000270115.1_5	1	ENST00000602618.1_1	1
ENSG00000256142.1	chr1	33764975	33766320	+	1345	291	332	262	232	188	206	194	193	394	342	460	465	AL513327.1	ENSG00000256142.1	1	ENST00000543783.1	2
ENSG00000184389.9_2	chr1	33772367	33786699	-	1023	1	4	0	5	0	0	0	0	0	0	0	0	A3GALT2	ENSG00000184389.9_2	1	ENST00000442999.3_1	5
ENSG00000225313.5_4	chr1	33772949	33814846	+	4015	0	0	0	8	0	0	0	0	0	0	0	0	RP11-415J8.3	ENSG00000225313.5_4	11	ENST00000627421.1_1,ENST00000588828.1_1,ENST00000624453.3_2,ENST00000630229.1_2,ENST00000457957.2_2,ENST00000587696.2_2,ENST00000625117.1_2,ENST00000624012.1_2,ENST00000628643.2_2,ENST00000630909.2_2,ENST00000627130.1_2	2,2,2,2,3,3,2,2,2,2,4
ENSG00000134686.18_4	chr1	33789224	33896653	-	4975	875	1124	956	980	818	781	755	588	919	936	941	904	PHC2	ENSG00000134686.18_4	12	ENST00000431992.5_2,ENST00000485928.5_1,ENST00000373418.7_1,ENST00000373422.7_3,ENST00000257118.5_1,ENST00000467894.5_1,ENST00000486897.5_1,ENST00000493483.5_1,ENST00000473158.1_1,ENST00000459964.1_1,ENST00000468406.5_1,ENST00000484692.1_1	13,8,7,8,14,8,5,6,4,3,6,3
ENSG00000266239.1	chr1	33797994	33798093	-	100	114	120	128	123	90	72	107	85	130	120	134	96	MIR3605	ENSG00000266239.1	1	ENST00000583214.1	1
ENSG00000222112.1	chr1	33802167	33802465	-	299	2	18	1	5	9	15	9	4	7	20	3	6	RN7SKP16	ENSG00000222112.1	1	ENST00000410180.1	1
ENSG00000233246.1_4	chr1	33815953	33828846	+	490	44	31	38	47	19	40	22	13	34	71	32	34	RP11-415J8.5	ENSG00000233246.1_4	1	ENST00000432703.1_1	3
ENSG00000221225.1	chr1	33907626	33907712	-	87	0	0	0	0	0	0	0	0	0	0	0	0	AL138837.1	ENSG00000221225.1	1	ENST00000408298.1	1
ENSG00000234512.1_3	chr1	33931850	33934555	+	2706	0	0	0	0	0	0	0	0	0	0	0	0	RP1-149P10.1	ENSG00000234512.1_3	1	ENST00000413515.1_1	1
ENSG00000121903.14_2	chr1	33938246	33962107	+	5308	161	253	203	201	151	157	79	114	151	122	210	177	ZSCAN20	ENSG00000121903.14_2	3	ENST00000361328.7_1,ENST00000373413.2_1,ENST00000480917.1_1	8,4,4
ENSG00000235907.2_4	chr1	33977608	33978343	-	736	0	0	0	0	0	0	0	0	0	0	0	0	RP4-580O19.2	ENSG00000235907.2_4	1	ENST00000424879.2_1	1
ENSG00000121904.17_3	chr1	33979599	34631443	-	18157	5	0	0	0	5	1	0	0	0	1	11	8	CSMD2	ENSG00000121904.17_3	10	ENST00000373381.8_2,ENST00000373388.6_2,ENST00000619121.4_1,ENST00000241312.8_1,ENST00000465819.1_1,ENST00000373380.5_1,ENST00000489419.1_1,ENST00000373377.1_1,ENST00000338325.1_1,ENST00000471438.2_1	71,70,71,70,5,24,2,13,7,4
ENSG00000227000.2_2	chr1	34304124	34305741	+	1618	0	0	0	0	0	0	0	0	0	0	0	0	HSPD1P14	ENSG00000227000.2_2	1	ENST00000432666.2_1	1
ENSG00000176256.10_3	chr1	34326076	34330392	+	2561	2	0	0	0	0	0	0	0	0	0	0	0	HMGB4	ENSG00000176256.10_3	4	ENST00000519684.5_1,ENST00000522796.1_2,ENST00000458277.1_1,ENST00000425537.1_1	2,4,3,2
ENSG00000231163.5_4	chr1	34334554	34351059	+	2253	0	0	0	0	0	0	0	0	0	0	0	0	RP5-1007G16.1	ENSG00000231163.5_4	6	ENST00000425631.5_1,ENST00000434181.5_1,ENST00000432447.5_1,ENST00000414868.1_1,ENST00000438719.1_1,ENST00000431046.1_1	8,3,3,3,2,3
ENSG00000201148.1	chr1	34578550	34578664	+	115	0	0	0	0	0	0	0	0	0	0	0	0	RNA5SP42	ENSG00000201148.1	1	ENST00000364278.1	1
ENSG00000142698.14_3	chr1	34632484	34684732	+	2576	0	0	0	0	0	0	0	0	0	0	0	0	C1orf94	ENSG00000142698.14_3	2	ENST00000373374.7_2,ENST00000488417.1_2	7,7
ENSG00000221053.1	chr1	34641467	34641550	-	84	0	0	0	0	0	0	0	0	0	0	0	0	AC115286.1	ENSG00000221053.1	1	ENST00000408126.1	1
ENSG00000270241.1_4	chr1	34742460	34742893	-	434	0	0	0	0	0	0	0	0	0	0	0	0	RP4-657M3.2	ENSG00000270241.1_4	1	ENST00000604298.1_1	1
ENSG00000207941.1	chr1	35135200	35135295	-	96	0	0	0	0	0	0	0	0	0	0	0	0	MIR552	ENSG00000207941.1	1	ENST00000385206.1	1
ENSG00000163866.8_3	chr1	35178338	35325417	-	8091	60	113	132	147	107	104	53	72	117	120	120	87	SMIM12	ENSG00000163866.8_3	6	ENST00000426886.1_1,ENST00000521580.2_1,ENST00000446026.1_1,ENST00000456842.1_1,ENST00000423898.1_1,ENST00000417239.1_1	5,2,2,2,2,3
ENSG00000189280.3_2	chr1	35220648	35224113	+	1355	0	0	0	0	0	0	0	0	0	0	0	0	GJB5	ENSG00000189280.3_2	1	ENST00000338513.1_1	2
ENSG00000189433.5_2	chr1	35225342	35229325	+	2840	0	0	0	0	0	0	0	0	0	0	0	0	GJB4	ENSG00000189433.5_2	1	ENST00000339480.1_1	2
ENSG00000255811.1_5	chr1	35227027	35253698	-	560	0	0	0	0	0	0	0	0	0	2	0	0	RP1-34M23.5	ENSG00000255811.1_5	1	ENST00000542839.1_1	2
ENSG00000216162.1	chr1	35244162	35244245	-	84	0	0	0	0	0	0	0	0	0	0	0	0	AL121988.1	ENSG00000216162.1	1	ENST00000401343.1	1
ENSG00000188910.7_2	chr1	35246790	35251970	+	2387	0	0	0	0	0	0	0	0	0	0	0	0	GJB3	ENSG00000188910.7_2	2	ENST00000373366.2_1,ENST00000373362.3_1	2,2
ENSG00000187513.8_2	chr1	35258599	35261348	+	1717	1	0	0	0	0	0	0	0	0	0	0	0	GJA4	ENSG00000187513.8_2	2	ENST00000342280.4_1,ENST00000450137.1_1	2,2
ENSG00000230163.1_4	chr1	35316295	35317156	+	720	0	0	0	0	0	0	0	0	0	0	0	0	RP5-997D16.2	ENSG00000230163.1_4	1	ENST00000429293.1_1	2
ENSG00000116544.11_2	chr1	35331037	35395186	-	3977	15	24	5	3	2	14	15	18	47	36	7	14	DLGAP3	ENSG00000116544.11_2	3	ENST00000235180.4_1,ENST00000373347.5_1,ENST00000495979.1_1	10,12,3
ENSG00000252728.1	chr1	35409357	35409425	+	69	0	0	0	0	0	0	0	0	0	0	0	0	SNORD112	ENSG00000252728.1	1	ENST00000516919.1	1
ENSG00000284773.1_1	chr1	35439957	35450914	-	3163	169	246	367	258	139	161	169	140	135	98	137	140	RP11-244H3.5	ENSG00000284773.1_1	1	ENST00000417456.1_2	2
ENSG00000241014.2_5	chr1	35441300	35444307	-	1887	160	234	369	240	137	155	169	130	129	93	113	129	RP11-244H3.1	ENSG00000241014.2_5	2	ENST00000311990.4_1,ENST00000642415.1_1	3,1
ENSG00000271741.1_5	chr1	35447134	35497342	-	3099	631	800	800	665	505	489	380	369	706	486	682	589	RP11-244H3.4	ENSG00000271741.1_5	1	ENST00000487874.1_1	17
ENSG00000243749.1_4	chr1	35447136	35450954	-	922	157	163	246	155	140	75	54	63	183	105	158	113	TMEM35B	ENSG00000243749.1_4	1	ENST00000373337.3_2	3
ENSG00000163867.16_3	chr1	35451766	35497569	-	9591	570	795	676	607	453	476	430	392	613	463	629	567	ZMYM6	ENSG00000163867.16_3	9	ENST00000493328.5_1,ENST00000357182.8_1,ENST00000466345.1_1,ENST00000472971.1_1,ENST00000415531.5_1,ENST00000317538.9_1,ENST00000460607.1_1,ENST00000373333.1_1,ENST00000471566.1_1	15,16,4,3,6,4,3,5,2
ENSG00000233940.1_3	chr1	35519069	35524872	+	478	0	0	1	1	0	0	0	0	0	0	1	0	RP11-248I9.2	ENSG00000233940.1_3	1	ENST00000428087.1_1	2
ENSG00000197056.9_2	chr1	35525387	35581460	+	4828	383	362	383	340	398	308	262	217	517	389	585	408	ZMYM1	ENSG00000197056.9_2	10	ENST00000417119.5_1,ENST00000611874.4_1,ENST00000359858.8_1,ENST00000466390.5_1,ENST00000488455.5_1,ENST00000475654.5_1,ENST00000373329.5_1,ENST00000373330.1_1,ENST00000476269.1_1,ENST00000463393.1_1	11,11,10,4,11,5,9,11,4,4
ENSG00000228348.1_3	chr1	35587623	35588085	+	463	7	1	0	0	0	0	0	1	4	6	2	1	RP11-181E22.1	ENSG00000228348.1_3	1	ENST00000442409.1_1	1
ENSG00000284640.1_2	chr1	35607116	35612036	-	1886	8	7	2	0	0	4	0	0	8	0	18	3	RP11-181E22.4	ENSG00000284640.1_2	1	ENST00000641402.1_1	3
ENSG00000116560.10_2	chr1	35641979	35658749	-	7426	1380	1496	1895	1209	2617	2739	1938	1732	1531	1450	1388	1469	SFPQ	ENSG00000116560.10_2	10	ENST00000471991.5_1,ENST00000468598.5_1,ENST00000460428.5_1,ENST00000470472.5_1,ENST00000466745.5_1,ENST00000466213.5_1,ENST00000490668.5_1,ENST00000485365.1_1,ENST00000485454.1_1,ENST00000357214.5_1	2,3,6,9,4,3,4,4,2,10
ENSG00000201868.1	chr1	35661570	35661663	+	94	0	0	2	0	0	1	0	0	0	0	0	0	Y_RNA	ENSG00000201868.1	1	ENST00000364998.1	1
ENSG00000263591.1	chr1	35729823	35730083	-	261	0	0	0	0	0	0	0	0	0	0	0	0	RN7SL136P	ENSG00000263591.1	1	ENST00000583196.1	1
ENSG00000146463.11_3	chr1	35734568	35887659	+	7647	3628	3959	5137	3927	3381	2967	2583	2417	2970	2296	3458	3034	ZMYM4	ENSG00000146463.11_3	6	ENST00000314607.10_1,ENST00000441447.1_1,ENST00000457946.1_1,ENST00000482131.1_1,ENST00000470175.1_1,ENST00000492456.1_1	30,4,24,3,5,3
ENSG00000240374.2	chr1	35757801	35758099	-	299	0	0	0	0	0	0	0	0	0	0	0	0	RN7SL503P	ENSG00000240374.2	1	ENST00000475222.2	1
ENSG00000201542.1	chr1	35775875	35776026	+	152	0	0	0	0	0	0	0	0	0	0	0	3	SNORA62	ENSG00000201542.1	1	ENST00000364672.1	1
ENSG00000229994.1_3	chr1	35816323	35817208	+	886	28	26	42	18	30	26	4	9	51	52	31	27	RP4-765A10.1	ENSG00000229994.1_3	1	ENST00000434805.1_1	1
ENSG00000227409.1_4	chr1	35824423	35831678	-	459	0	0	0	0	0	0	0	0	0	0	0	0	RP4-765A10.2	ENSG00000227409.1_4	1	ENST00000432683.1_1	2
ENSG00000202129.1	chr1	35893417	35893494	-	78	0	0	0	0	0	0	0	0	0	0	0	0	RNY5P1	ENSG00000202129.1	1	ENST00000365259.1	1
ENSG00000142687.17_3	chr1	35899091	36023551	-	9629	4336	5319	6070	5855	3620	3221	2653	2397	3793	3208	4402	4057	KIAA0319L	ENSG00000142687.17_3	20	ENST00000325722.7_1,ENST00000373266.8_1,ENST00000426982.6_1,ENST00000461312.5_1,ENST00000485551.5_1,ENST00000473423.1_1,ENST00000473844.1_1,ENST00000474856.1_1,ENST00000492544.1_1,ENST00000440579.5_3,ENST00000467109.1_1,ENST00000431916.5_3,ENST00000482929.6_1,ENST00000478463.6_1,ENST00000470388.5_1,ENST00000492888.1_1,ENST00000469892.5_3,ENST00000494948.1_3,ENST00000476329.1_1,ENST00000473465.1_1	21,12,21,5,15,2,4,2,4,13,2,6,8,6,6,4,4,3,3,2
ENSG00000236274.1_4	chr1	35975343	35977039	+	1003	0	0	0	0	0	0	0	0	0	0	0	0	RP4-728D4.3	ENSG00000236274.1_4	1	ENST00000442276.1_1	4
ENSG00000020129.15_3	chr1	36023074	36032875	+	4917	990	1600	1539	1248	1162	1126	779	933	1355	1334	1408	1509	NCDN	ENSG00000020129.15_3	6	ENST00000373253.7_2,ENST00000356090.8_2,ENST00000373243.6_2,ENST00000459931.1_1,ENST00000437806.1_1,ENST00000423723.1_1	7,8,7,4,3,4
ENSG00000239636.1_4	chr1	36035414	36043330	-	1030	7	1	12	5	0	0	7	0	5	0	0	0	RP4-728D4.2	ENSG00000239636.1_4	2	ENST00000425881.1_1,ENST00000444348.1_1	2,3
ENSG00000116819.6_2	chr1	36038971	36060929	+	2189	0	1	13	4	0	0	2	0	1	1	4	0	TFAP2E	ENSG00000116819.6_2	1	ENST00000373235.3_1	7
ENSG00000126067.11_2	chr1	36065145	36107445	-	4843	1958	2090	2399	1604	1800	1541	1199	1358	2101	1963	2193	2004	PSMB2	ENSG00000126067.11_2	3	ENST00000621781.4_1,ENST00000373237.3_1,ENST00000630477.1_1	5,6,5
ENSG00000239859.2	chr1	36171626	36171875	-	250	0	0	0	0	0	0	0	0	0	0	0	0	RN7SL281P	ENSG00000239859.2	1	ENST00000464618.2	1
ENSG00000142686.7_2	chr1	36179476	36185073	-	3629	7	48	47	31	18	21	16	27	20	43	10	14	C1orf216	ENSG00000142686.7_2	3	ENST00000270815.4_1,ENST00000503824.1_1,ENST00000453178.1_1	2,2,3
ENSG00000092853.13_3	chr1	36185819	36235568	-	5411	504	528	699	492	583	587	583	378	739	793	775	710	CLSPN	ENSG00000092853.13_3	6	ENST00000251195.9_3,ENST00000466308.1_1,ENST00000318121.7_1,ENST00000373220.7_1,ENST00000520551.1_3,ENST00000517467.1_1	25,4,25,24,25,3
ENSG00000232335.1_4	chr1	36204990	36209177	+	539	0	0	0	0	0	4	0	0	0	6	0	0	RP11-435D7.3	ENSG00000232335.1_4	1	ENST00000373226.2_1	2
ENSG00000134698.10_2	chr1	36273773	36323491	+	7267	553	573	551	522	346	333	375	254	369	436	431	426	AGO4	ENSG00000134698.10_2	3	ENST00000373210.3_1,ENST00000488778.1_1,ENST00000496257.1_1	18,3,2
ENSG00000092847.11_3	chr1	36335409	36396129	+	13886	2466	2877	5612	4211	2657	2446	1592	1539	2947	2912	3425	2817	AGO1	ENSG00000092847.11_3	3	ENST00000373206.5_2,ENST00000373204.5_1,ENST00000635259.1_2	19,19,17
ENSG00000271164.1_4	chr1	36338871	36339353	-	483	0	0	0	0	0	0	0	0	0	0	0	0	RP4-789D17.4	ENSG00000271164.1_4	1	ENST00000604465.1_1	1
ENSG00000271914.1_4	chr1	36395321	36395716	-	396	10	6	46	22	21	28	2	8	19	16	35	13	RP4-789D17.5	ENSG00000271914.1_4	1	ENST00000606838.1_1	1
ENSG00000126070.19_2	chr1	36396319	36538101	+	21157	643	628	1209	842	511	452	591	387	645	675	571	522	AGO3	ENSG00000126070.19_2	7	ENST00000324350.9_1,ENST00000373191.8_1,ENST00000397828.3_1,ENST00000634486.1_1,ENST00000246314.10_1,ENST00000491443.2_1,ENST00000471099.1_1	7,19,6,21,17,3,2
ENSG00000271554.1_4	chr1	36457710	36479231	-	659	0	0	0	0	0	0	0	0	0	0	0	0	RP4-665N4.8	ENSG00000271554.1_4	2	ENST00000466576.2_1,ENST00000479395.2_1	3,2
ENSG00000232862.5_4	chr1	36545667	36549627	-	1674	9	0	11	0	0	0	0	10	8	7	5	6	RP4-665N4.4	ENSG00000232862.5_4	2	ENST00000446354.2_1,ENST00000437804.2_1	3,1
ENSG00000092850.11_2	chr1	36549676	36553876	+	1978	26	27	5	8	19	23	14	6	15	22	53	44	TEKT2	ENSG00000092850.11_2	3	ENST00000207457.7_1,ENST00000469024.1_1,ENST00000473120.1_1	10,10,3
ENSG00000116863.10_2	chr1	36554476	36559533	+	1668	80	83	100	85	58	41	53	46	48	66	91	83	ADPRHL2	ENSG00000116863.10_2	1	ENST00000373178.4_1	6
ENSG00000171812.12_4	chr1	36560837	36590821	-	4670	0	2	5	0	0	0	0	0	0	3	0	0	COL8A2	ENSG00000171812.12_4	3	ENST00000397799.1_4,ENST00000303143.9_4,ENST00000481785.1_4	4,2,2
ENSG00000054116.11_2	chr1	36602171	36621654	-	3527	566	718	756	608	673	487	424	359	729	653	757	724	TRAPPC3	ENSG00000054116.11_2	10	ENST00000616074.4_1,ENST00000616395.4_1,ENST00000617904.4_1,ENST00000373166.7_1,ENST00000462715.1_1,ENST00000373163.5_1,ENST00000373162.5_1,ENST00000469757.1_1,ENST00000373159.1_1,ENST00000497251.1_1	3,5,5,5,3,5,5,2,5,3
ENSG00000116871.15_4	chr1	36621180	36646450	+	5271	596	756	1185	1038	630	807	604	444	794	804	684	744	MAP7D1	ENSG00000116871.15_4	13	ENST00000429533.6_3,ENST00000316156.8_3,ENST00000527764.1_1,ENST00000373150.8_3,ENST00000373151.6_3,ENST00000530729.1_3,ENST00000462118.1_1,ENST00000474796.1_1,ENST00000530975.4_3,ENST00000487131.3_1,ENST00000373148.5_1,ENST00000532131.1_1,ENST00000487114.1_1	6,16,3,18,17,4,2,5,4,5,10,4,4
ENSG00000264592.1	chr1	36657516	36657769	+	254	0	0	0	0	0	0	0	0	0	0	0	0	RN7SL131P	ENSG00000264592.1	1	ENST00000579043.1	1
ENSG00000054118.13_4	chr1	36690017	36770958	+	4736	2361	2572	2962	2578	2172	1786	1465	1401	2336	2021	3093	2380	THRAP3	ENSG00000054118.13_4	4	ENST00000354618.9_2,ENST00000469141.6_2,ENST00000478853.1_2,ENST00000466743.1_1	12,13,4,5
ENSG00000231849.1_3	chr1	36707499	36707757	-	259	0	0	0	0	0	0	0	0	0	0	0	0	RP11-238O13.1	ENSG00000231849.1_3	1	ENST00000447495.1_1	1
ENSG00000214193.10_5	chr1	36771988	36790487	+	4474	1283	1527	2319	2019	1071	753	714	538	1365	1129	1281	1309	SH3D21	ENSG00000214193.10_5	6	ENST00000453908.7_4,ENST00000505871.6_2,ENST00000480549.5_1,ENST00000496636.1_1,ENST00000508854.1_1,ENST00000474766.1_1	16,13,12,4,2,5
ENSG00000142694.6_2	chr1	36787632	36789755	-	1211	20	19	9	20	13	5	21	24	32	4	11	21	EVA1B	ENSG00000142694.6_2	2	ENST00000270824.1_1,ENST00000490466.1_1	3,3
ENSG00000116883.8_5	chr1	36789335	36794822	+	1838	64	60	149	112	41	92	34	29	75	70	73	99	RP11-268J15.5	ENSG00000116883.8_5	1	ENST00000373137.2_1	2
ENSG00000196182.10_3	chr1	36805225	36851497	-	5590	1099	1711	2397	2026	1162	1105	770	865	1128	960	1140	1251	STK40	ENSG00000196182.10_3	8	ENST00000359297.6_1,ENST00000373129.7_2,ENST00000373130.7_2,ENST00000373132.3_2,ENST00000460417.5_1,ENST00000473733.5_1,ENST00000482458.1_1,ENST00000460017.1_1	9,12,11,11,5,5,6,3
ENSG00000181817.5_2	chr1	36856839	36863493	-	1496	135	182	207	234	213	138	136	118	224	212	210	151	LSM10	ENSG00000181817.5_2	3	ENST00000476041.1_1,ENST00000315732.2_1,ENST00000489912.1_1	4,2,2
ENSG00000222821.1	chr1	36868322	36868460	-	139	0	0	0	0	0	0	0	0	0	0	0	0	RNU4-27P	ENSG00000222821.1	1	ENST00000410889.1	1
ENSG00000116885.18_3	chr1	36881428	36916052	-	2788	114	179	90	87	69	64	53	61	186	237	179	178	OSCP1	ENSG00000116885.18_3	12	ENST00000468441.5_1,ENST00000495222.5_1,ENST00000235532.9_2,ENST00000356637.9_3,ENST00000471369.1_1,ENST00000433045.6_1,ENST00000445843.7_1,ENST00000475160.1_1,ENST00000525869.1_1,ENST00000528112.1_1,ENST00000354267.3_1,ENST00000524789.1_1	4,4,10,11,2,10,9,3,2,5,5,4
ENSG00000201448.1	chr1	36884051	36884179	-	129	5	0	0	3	0	0	6	0	0	7	0	0	SNORA63	ENSG00000201448.1	1	ENST00000364578.1	1
ENSG00000116898.11_2	chr1	36921319	36930038	-	2916	908	920	1065	751	740	740	562	553	971	674	910	871	MRPS15	ENSG00000116898.11_2	4	ENST00000373116.5_1,ENST00000488606.5_1,ENST00000477040.1_1,ENST00000462067.1_1	8,3,2,4
ENSG00000119535.17_4	chr1	36931644	36948879	-	8429	1	0	0	0	0	0	0	0	1	1	16	0	CSF3R	ENSG00000119535.17_4	15	ENST00000373106.5_2,ENST00000373104.5_2,ENST00000373103.5_2,ENST00000480825.6_1,ENST00000361632.8_2,ENST00000464465.6_1,ENST00000331941.6_2,ENST00000487540.6_1,ENST00000484762.1_1,ENST00000466138.1_1,ENST00000464365.2_1,ENST00000469380.1_1,ENST00000526980.5_1,ENST00000489551.5_1,ENST00000533491.1_1	17,18,17,9,15,7,16,10,4,2,9,2,4,3,4
ENSG00000230214.1_3	chr1	37095936	37096458	+	523	0	1	0	0	0	0	0	0	0	0	0	0	RP4-655C4.1	ENSG00000230214.1_3	1	ENST00000453860.1_1	1
ENSG00000284705.1_2	chr1	37169554	37176183	+	2694	0	0	0	0	0	0	0	0	0	0	0	0	RP11-251B9.1	ENSG00000284705.1_2	1	ENST00000641463.1_1	2
ENSG00000284720.1_2	chr1	37233723	37235326	-	1521	0	0	0	0	0	0	0	0	0	0	0	0	RP4-614N24.3	ENSG00000284720.1_2	1	ENST00000642109.1_1	2
ENSG00000234481.1_4	chr1	37238741	37241369	+	463	0	0	0	0	0	0	0	0	0	0	0	0	RP4-614N24.1	ENSG00000234481.1_4	1	ENST00000451375.1_1	2
ENSG00000163873.9_3	chr1	37261128	37499730	-	10111	23	9	3	9	9	3	0	3	0	0	10	14	GRIK3	ENSG00000163873.9_3	4	ENST00000373091.7_1,ENST00000373093.4_1,ENST00000462621.1_1,ENST00000479620.1_1	16,15,4,2
ENSG00000284650.1_2	chr1	37599090	37601747	+	1039	8	0	0	0	0	0	0	0	0	0	0	0	RP3-406M12.1	ENSG00000284650.1_2	1	ENST00000642067.1_1	2
ENSG00000264698.1	chr1	37627164	37627235	+	72	0	0	0	0	0	0	0	0	0	0	0	0	MIR4255	ENSG00000264698.1	1	ENST00000579351.1	1
ENSG00000207328.1	chr1	37669211	37669317	+	107	0	0	0	0	0	0	0	0	0	0	0	0	RNU6-636P	ENSG00000207328.1	1	ENST00000384598.1	1
ENSG00000223944.1_4	chr1	37728340	37790701	-	596	0	0	0	0	0	0	0	0	0	0	0	0	RP5-1180C18.1	ENSG00000223944.1_4	1	ENST00000413901.1_1	4
ENSG00000252368.1	chr1	37730278	37730387	-	110	0	0	0	0	0	0	0	0	0	0	0	0	RNA5SP43	ENSG00000252368.1	1	ENST00000516559.1	1
ENSG00000230451.2_3	chr1	37796453	37796597	+	145	0	0	0	0	0	0	0	0	0	0	0	0	RP5-1090E8.1	ENSG00000230451.2_3	1	ENST00000438196.2_1	1
ENSG00000233621.1_4	chr1	37920480	37940012	-	1395	3	6	8	10	2	9	0	4	1	8	6	5	RP11-422J8.1	ENSG00000233621.1_4	1	ENST00000424989.1_1	3
ENSG00000163874.10_3	chr1	37940153	37949980	+	3121	76	120	180	145	109	85	101	99	125	192	154	143	ZC3H12A	ENSG00000163874.10_3	4	ENST00000373087.6_1,ENST00000640233.1_1,ENST00000472312.1_1,ENST00000471012.1_3	6,6,2,2
ENSG00000163875.15_3	chr1	37958176	37980375	-	3487	612	570	904	637	598	434	438	384	809	736	869	694	MEAF6	ENSG00000163875.15_3	9	ENST00000373075.6_1,ENST00000296214.9_1,ENST00000373074.5_1,ENST00000475828.5_1,ENST00000487788.5_1,ENST00000373073.8_1,ENST00000487792.5_1,ENST00000448519.2_2,ENST00000485039.1_1	8,7,6,8,9,6,8,8,4
ENSG00000263675.1	chr1	37966536	37966595	-	60	0	0	8	0	11	0	7	1	11	1	7	4	MIR5581	ENSG00000263675.1	1	ENST00000580821.1	1
ENSG00000163877.10_2	chr1	38000050	38019945	-	5769	92	147	232	162	122	126	64	79	177	170	228	172	SNIP1	ENSG00000163877.10_2	4	ENST00000296215.7_2,ENST00000638725.1_1,ENST00000468040.2_2,ENST00000493916.1_1	4,2,5,2
ENSG00000232273.1_3	chr1	38010364	38010895	+	532	0	0	6	2	0	0	0	0	10	10	0	6	FTHL1	ENSG00000232273.1_3	1	ENST00000437933.1_1	1
ENSG00000237749.4_4	chr1	38021848	38022100	+	253	4	1	6	0	1	0	2	3	3	3	5	4	RP3-423B22.5	ENSG00000237749.4_4	1	ENST00000423216.2_1	1
ENSG00000163879.10_2	chr1	38022520	38032458	+	4456	19	26	87	69	24	60	17	24	41	55	76	43	DNALI1	ENSG00000163879.10_2	5	ENST00000296218.7_1,ENST00000490312.1_1,ENST00000466723.1_1,ENST00000497858.1_1,ENST00000467277.1_1	6,2,4,2,3
ENSG00000134697.12_4	chr1	38032417	38061536	-	5745	770	614	912	786	590	513	407	486	812	685	893	633	GNL2	ENSG00000134697.12_4	9	ENST00000490029.1_1,ENST00000373062.7_1,ENST00000462812.5_1,ENST00000479255.1_1,ENST00000538069.2_4,ENST00000469191.1_1,ENST00000489146.1_1,ENST00000463351.1_1,ENST00000488496.1_1	2,16,4,3,5,3,2,3,2
ENSG00000284748.1_2	chr1	38061727	38072937	+	1326	0	7	9	11	2	1	0	7	9	11	14	24	RP11-566C13.2	ENSG00000284748.1_2	1	ENST00000641190.1_1	2
ENSG00000169218.13_2	chr1	38076951	38100595	-	3089	0	6	0	0	0	0	4	0	0	3	1	3	RSPO1	ENSG00000169218.13_2	4	ENST00000615459.4_1,ENST00000612451.4_1,ENST00000356545.6_1,ENST00000401068.1_1	8,7,8,8
ENSG00000116922.14_3	chr1	38147242	38157921	-	4434	128	120	189	82	115	112	117	59	160	254	159	121	C1orf109	ENSG00000116922.14_3	14	ENST00000358011.8_2,ENST00000494120.1_1,ENST00000609516.1_1,ENST00000464178.1_1,ENST00000464085.5_3,ENST00000491981.5_2,ENST00000461359.5_1,ENST00000477060.1_2,ENST00000486637.1_1,ENST00000491797.1_1,ENST00000488137.5_2,ENST00000472584.1_1,ENST00000619962.1_2,ENST00000498448.1_1	5,7,1,4,5,4,3,3,3,2,3,2,3,2
ENSG00000134690.10_2	chr1	38158090	38175391	+	2469	1113	1136	937	897	976	899	647	665	1149	1140	1091	1081	CDCA8	ENSG00000134690.10_2	2	ENST00000373055.5_1,ENST00000327331.2_1	10,11
ENSG00000183317.16_4	chr1	38179552	38230805	-	8152	63	189	136	144	102	72	75	93	282	198	143	216	EPHA10	ENSG00000183317.16_4	11	ENST00000432874.7_2,ENST00000534097.5_1,ENST00000437645.5_1,ENST00000444950.1_1,ENST00000446149.6_1,ENST00000427468.6_2,ENST00000373048.8_2,ENST00000453577.1_1,ENST00000540011.2_1,ENST00000525749.1_2,ENST00000319637.6_1	16,14,17,2,15,18,17,2,7,5,3
ENSG00000200421.1	chr1	38203627	38203726	-	100	0	0	0	0	0	0	0	0	0	0	0	0	Y_RNA	ENSG00000200421.1	1	ENST00000363551.1	1
ENSG00000238871.1	chr1	38215874	38215974	+	101	0	0	0	0	0	0	0	0	0	0	0	0	snoU13	ENSG00000238871.1	1	ENST00000459008.1	1
ENSG00000214141.4_3	chr1	38242342	38245090	+	1892	0	0	0	0	0	0	0	0	0	0	0	0	RP11-109P14.1	ENSG00000214141.4_3	1	ENST00000473049.1_1	2
ENSG00000227416.2_4	chr1	38248129	38248557	-	429	0	0	0	0	0	0	0	0	0	0	0	1	RP11-109P14.2	ENSG00000227416.2_4	1	ENST00000417484.1_1	1
ENSG00000185090.14_2	chr1	38259474	38266809	+	3018	505	803	470	439	551	570	400	349	631	889	627	578	MANEAL	ENSG00000185090.14_2	5	ENST00000373045.10_1,ENST00000397631.7_1,ENST00000532512.1_1,ENST00000525897.1_1,ENST00000329006.5_1	4,4,3,4,2
ENSG00000233728.1_4	chr1	38265392	38266551	-	700	0	0	0	0	0	0	0	0	0	0	0	0	RP11-109P14.9	ENSG00000233728.1_4	1	ENST00000433474.1_1	2
ENSG00000196449.3_2	chr1	38268616	38273857	-	1826	68	83	152	122	91	76	35	84	96	66	54	66	YRDC	ENSG00000196449.3_2	1	ENST00000373044.2_1	5
ENSG00000197982.13_4	chr1	38272651	38275126	+	2231	92	117	116	182	143	112	69	85	146	207	132	144	C1orf122	ENSG00000197982.13_4	4	ENST00000373043.1_4,ENST00000419397.3_1,ENST00000468084.1_4,ENST00000373042.4_4	2,2,3,3
ENSG00000188786.9_2	chr1	38275239	38325292	-	8024	722	974	1414	1155	902	834	555	481	1070	878	1002	967	MTF1	ENSG00000188786.9_2	2	ENST00000373036.4_1,ENST00000468190.1_1	11,2
ENSG00000230610.1	chr1	38292232	38293886	-	45	0	1	0	2	1	0	0	0	1	2	3	1	AL929472.1	ENSG00000230610.1	1	ENST00000448796.1	2
ENSG00000235673.1_4	chr1	38306658	38307348	+	691	0	0	0	0	0	0	0	0	0	0	0	0	RP11-109P14.8	ENSG00000235673.1_4	1	ENST00000447422.1_1	1
ENSG00000230955.1_4	chr1	38326369	38327252	+	481	4	2	0	3	0	1	1	1	9	1	5	3	RP11-109P14.10	ENSG00000230955.1_4	1	ENST00000419993.1_1	2
ENSG00000204084.12_3	chr1	38326369	38412729	-	8930	841	1111	1414	1032	884	819	827	630	1007	1121	845	1087	INPP5B	ENSG00000204084.12_3	11	ENST00000373027.5_1,ENST00000458109.6_1,ENST00000373023.6_1,ENST00000373026.5_1,ENST00000373024.7_1,ENST00000487328.1_1,ENST00000470364.5_1,ENST00000474758.1_1,ENST00000467066.1_1,ENST00000373021.1_1,ENST00000491406.2_3	18,20,24,23,24,2,5,2,4,6,7
ENSG00000252448.1	chr1	38349909	38349989	+	81	0	0	0	0	0	0	0	0	0	0	0	0	SNORA63	ENSG00000252448.1	1	ENST00000516639.1	1
ENSG00000222282.1	chr1	38350695	38350789	+	95	0	0	0	0	0	0	0	0	0	0	0	0	RNU6-584P	ENSG00000222282.1	1	ENST00000410350.1	1
ENSG00000183431.11_2	chr1	38422647	38456593	-	4740	389	538	625	531	487	470	473	403	724	1030	792	670	SF3A3	ENSG00000183431.11_2	8	ENST00000373019.4_1,ENST00000487062.1_1,ENST00000460925.1_1,ENST00000489537.5_1,ENST00000461869.5_1,ENST00000470585.5_1,ENST00000488934.1_1,ENST00000462258.1_1	17,2,4,10,8,7,2,6
ENSG00000212541.1	chr1	38457134	38457241	+	108	0	0	1	0	0	0	0	0	0	6	3	0	RNU6-510P	ENSG00000212541.1	1	ENST00000391239.1	1
ENSG00000183386.9_2	chr1	38462442	38471278	-	2004	96	199	143	165	150	138	62	99	169	174	167	201	FHL3	ENSG00000183386.9_2	5	ENST00000485803.5_1,ENST00000373016.3_1,ENST00000475084.5_1,ENST00000477194.5_1,ENST00000483132.1_1	5,6,4,6,2
ENSG00000183520.11_3	chr1	38474930	38490496	+	3385	327	315	448	334	301	251	289	209	506	510	575	450	UTP11	ENSG00000183520.11_3	4	ENST00000483182.5_1,ENST00000486563.1_1,ENST00000373014.4_1,ENST00000488453.1_1	6,2,8,6
ENSG00000185668.7_3	chr1	38510283	38512466	-	2184	37	95	57	59	93	26	24	41	98	124	101	104	POU3F1	ENSG00000185668.7_3	1	ENST00000373012.4_2	1
ENSG00000224592.5_4	chr1	38512986	38584697	+	684	1	0	5	6	1	5	11	4	20	34	15	23	RP5-884C9.2	ENSG00000224592.5_4	2	ENST00000432922.5_1,ENST00000428151.1_1	4,5
ENSG00000223589.2_4	chr1	38546244	38546583	-	340	0	0	0	0	0	0	0	0	0	0	0	0	RP5-884C9.3	ENSG00000223589.2_4	1	ENST00000424719.2_1	1
ENSG00000265596.1	chr1	38554903	38555001	+	99	0	0	0	0	0	0	0	0	0	0	0	1	MIR3659	ENSG00000265596.1	1	ENST00000582606.1	1
ENSG00000284623.1_2	chr1	38595136	38606265	-	1562	0	0	0	0	0	0	0	0	0	0	0	0	RP5-884C9.4	ENSG00000284623.1_2	1	ENST00000641212.1_1	5
ENSG00000237290.1_3	chr1	38674706	38680439	-	2283	1	0	0	0	0	0	0	0	0	0	0	0	RP11-214L19.1	ENSG00000237290.1_3	1	ENST00000431311.1_1	4
ENSG00000275350.1_4	chr1	38849510	38850094	-	585	0	0	0	0	0	0	0	0	0	0	0	0	RP11-329N22.2	ENSG00000275350.1_4	1	ENST00000611376.1_1	1
ENSG00000200796.1	chr1	38862331	38862437	+	107	0	0	0	0	0	0	0	0	0	0	0	0	RNU6-753P	ENSG00000200796.1	1	ENST00000363926.1	1
ENSG00000238063.2_3	chr1	38940547	38961706	+	1497	0	0	0	0	0	0	0	0	0	0	0	0	RP11-329N22.1	ENSG00000238063.2_3	4	ENST00000634732.1_1,ENST00000634464.1_1,ENST00000634298.1_1,ENST00000452971.1_1	2,3,2,3
ENSG00000215895.4_4	chr1	39174603	39176562	+	1960	0	0	0	0	1	0	0	0	0	0	0	0	RP11-334L9.1	ENSG00000215895.4_4	1	ENST00000442006.2_1	1
ENSG00000284632.1_2	chr1	39219888	39281651	-	1240	1	9	1	15	11	5	0	8	9	4	19	12	RP11-334L9.2	ENSG00000284632.1_2	3	ENST00000641723.1_1,ENST00000641481.1_1,ENST00000641963.1_1	2,4,3
ENSG00000116954.7_2	chr1	39303870	39325495	-	5167	38	37	29	23	37	7	24	20	27	45	46	36	RRAGC	ENSG00000116954.7_2	4	ENST00000373001.3_1,ENST00000474456.1_1,ENST00000493015.1_1,ENST00000496778.1_1	7,2,5,2
ENSG00000273637.1_5	chr1	39305005	39340166	-	2171	59	56	100	64	56	50	45	54	96	78	89	72	RP5-864K19.7	ENSG00000273637.1_5	1	ENST00000622355.1_1	12
ENSG00000228436.2_4	chr1	39325672	39385068	+	976	85	45	133	101	63	43	50	48	40	47	48	35	RP5-864K19.4	ENSG00000228436.2_4	3	ENST00000433671.2_1,ENST00000456813.1_1,ENST00000443161.1_1	4,2,2
ENSG00000214114.8_3	chr1	39328636	39339777	-	3039	212	149	298	180	155	124	102	98	232	194	187	178	MYCBP	ENSG00000214114.8_3	4	ENST00000397572.4_3,ENST00000494695.4_3,ENST00000495043.5_1,ENST00000465771.3_1	5,4,4,4
ENSG00000274944.4_5	chr1	39330173	39347289	-	3251	78	43	91	71	76	45	43	44	87	62	64	69	RP5-864K19.6	ENSG00000274944.4_5	4	ENST00000489803.5_1,ENST00000454994.3_3,ENST00000489575.2_1,ENST00000621281.1_3	6,7,3,5
ENSG00000131233.9_3	chr1	39340123	39347259	-	2057	0	0	0	0	0	0	0	0	0	0	0	0	GJA9	ENSG00000131233.9_3	2	ENST00000360786.3_3,ENST00000357771.4_1	1,2
ENSG00000158315.10_2	chr1	39351479	39407471	-	2795	0	0	0	0	0	0	0	0	0	0	0	0	RHBDL2	ENSG00000158315.10_2	3	ENST00000372990.5_1,ENST00000289248.6_1,ENST00000540558.1_1	8,8,3
ENSG00000199963.1	chr1	39392542	39392649	+	108	0	0	0	0	0	0	0	0	0	0	0	0	RNU6-605P	ENSG00000199963.1	1	ENST00000363093.1	1
ENSG00000207466.1	chr1	39416497	39416597	-	101	0	0	0	0	0	0	0	0	0	0	0	0	Y_RNA	ENSG00000207466.1	1	ENST00000384735.1	1
ENSG00000235549.1_3	chr1	39423947	39424597	-	350	0	0	0	0	0	0	0	0	0	0	0	0	RP11-781D11.1	ENSG00000235549.1_3	1	ENST00000428233.1_1	2
ENSG00000174574.15_3	chr1	39456895	39471731	+	2741	356	296	554	405	397	408	207	281	579	370	478	542	AKIRIN1	ENSG00000174574.15_3	4	ENST00000432648.7_1,ENST00000446189.6_1,ENST00000372984.8_1,ENST00000531822.1_2	5,4,4,4
ENSG00000168653.10_2	chr1	39491990	39500308	+	548	184	212	169	111	180	133	99	167	176	206	244	188	NDUFS5	ENSG00000168653.10_2	2	ENST00000372969.7_1,ENST00000372967.3_1	3,3
ENSG00000127603.25_5	chr1	39546988	39952849	+	40739	4418	4813	4763	3908	3159	2648	2773	2419	4101	3898	3988	3520	MACF1	ENSG00000127603.25_5	34	ENST00000484793.5_1,ENST00000602421.5_1,ENST00000567887.5_2,ENST00000372915.7_2,ENST00000361689.6_1,ENST00000524432.5_1,ENST00000467673.5_1,ENST00000564288.5_2,ENST00000494012.1_1,ENST00000480624.5_1,ENST00000469366.1_1,ENST00000496804.5_1,ENST00000530262.5_1,ENST00000485063.1_1,ENST00000472385.1_1,ENST00000484393.1_1,ENST00000476350.1_1,ENST00000372925.6_1,ENST00000528611.1_1,ENST00000289893.8_1…	4,3,101,97,93,32,4,101,4,6,4,31,35,3,3,2,26,71,2,64,6,1,2,7,2,13,4,10,8,5,4,3,4,3
ENSG00000206654.1	chr1	39586612	39586715	-	104	0	0	0	0	0	0	0	0	0	0	0	0	RNU6-608P	ENSG00000206654.1	1	ENST00000383927.1	1
ENSG00000222378.1	chr1	39619836	39619968	-	133	0	0	0	0	0	0	0	0	0	0	0	0	RNA5SP44	ENSG00000222378.1	1	ENST00000410446.1	1
ENSG00000270040.1_5	chr1	39672184	39672629	+	446	0	0	0	0	0	0	0	0	0	0	0	3	RP11-416A14.1	ENSG00000270040.1_5	1	ENST00000602528.1_1	1
ENSG00000226438.1_4	chr1	39715510	39723321	-	558	0	0	0	0	0	0	0	0	0	0	0	0	RP11-420K8.1	ENSG00000226438.1_4	1	ENST00000289890.7_1	3
ENSG00000217897.2_3	chr1	39769966	39770570	-	288	0	0	0	0	0	0	0	0	0	0	0	0	RP11-420K8.2	ENSG00000217897.2_3	1	ENST00000406997.2_1	2
ENSG00000183682.7_3	chr1	39957318	39991607	+	1692	0	12	0	2	0	0	2	2	6	14	10	6	BMP8A	ENSG00000183682.7_3	1	ENST00000331593.5_1	7
ENSG00000237624.1_3	chr1	39980628	39982162	+	1535	0	0	0	0	0	0	0	0	0	3	0	0	RP11-69E11.7	ENSG00000237624.1_3	1	ENST00000447263.1_1	1
ENSG00000243970.2_3	chr1	39987952	40025343	-	3613	781	904	1539	1291	761	669	488	500	882	829	805	728	PPIEL	ENSG00000243970.2_3	11	ENST00000458207.5_1,ENST00000331856.7_2,ENST00000450157.6_2,ENST00000417869.6_2,ENST00000645296.1_1,ENST00000642822.1_1,ENST00000643783.1_1,ENST00000431553.6_2,ENST00000644305.1_1,ENST00000644158.1_1,ENST00000427240.2_2	5,12,11,11,10,12,10,10,11,12,7
ENSG00000090621.13_4	chr1	40026488	40042462	-	6782	4015	4335	5574	3911	3618	3336	3612	2629	5631	6564	5708	4603	PABPC4	ENSG00000090621.13_4	25	ENST00000482028.5_1,ENST00000492468.5_1,ENST00000437136.5_1,ENST00000468476.1_1,ENST00000372862.7_2,ENST00000372858.7_2,ENST00000372857.7_2,ENST00000372856.7_2,ENST00000530186.1_2,ENST00000421687.6_2,ENST00000484555.1_1,ENST00000525045.5_1,ENST00000527718.1_2,ENST00000477556.1_1,ENST00000461578.1_1,ENST00000483770.1_1,ENST00000525669.5_1,ENST00000470443.5_3,ENST00000513632.2_1,ENST00000525751.5_1…	2,4,7,2,15,16,16,15,2,14,3,4,6,2,2,3,4,8,2,4,6,3,2,3,2
ENSG00000228060.1_4	chr1	40030832	40038875	+	551	0	0	0	0	0	0	0	0	0	0	0	0	RP11-69E11.8	ENSG00000228060.1_4	1	ENST00000415255.1_1	4
ENSG00000201457.1	chr1	40033046	40033180	-	135	10	11	4	14	2	6	14	0	8	9	2	3	SNORA55	ENSG00000201457.1	1	ENST00000364587.1	1
ENSG00000163909.7_2	chr1	40089825	40105617	-	3661	324	517	321	250	350	292	255	240	719	717	696	566	HEYL	ENSG00000163909.7_2	1	ENST00000372852.3_1	5
ENSG00000225903.1_4	chr1	40099088	40099575	+	304	0	0	0	0	0	0	0	0	0	0	0	0	RP1-144F13.3	ENSG00000225903.1_4	1	ENST00000424418.1_1	2
ENSG00000116981.3_2	chr1	40124793	40137710	-	1107	40	70	66	46	60	28	35	25	41	65	43	64	NT5C1A	ENSG00000116981.3_2	1	ENST00000235628.1_1	6
ENSG00000116983.12_2	chr1	40144320	40157361	-	4962	272	249	425	358	194	136	125	185	324	261	310	308	HPCAL4	ENSG00000116983.12_2	3	ENST00000612703.3_1,ENST00000617690.2_1,ENST00000372844.7_1	3,5,4
ENSG00000084072.16_3	chr1	40157854	40229586	+	8071	304	392	403	321	247	313	239	262	438	438	339	393	PPIE	ENSG00000084072.16_3	15	ENST00000470018.5_1,ENST00000485507.5_1,ENST00000324379.9_1,ENST00000356511.6_1,ENST00000456578.6_1,ENST00000495526.5_1,ENST00000482751.5_1,ENST00000497370.5_3,ENST00000470213.5_1,ENST00000372835.9_1,ENST00000372830.5_1,ENST00000474804.5_3,ENST00000475350.5_3,ENST00000480169.1_1,ENST00000467741.2_1	8,4,10,10,3,10,9,9,8,7,11,8,10,7,4
ENSG00000225333.6_4	chr1	40183700	40184267	+	568	0	0	0	0	0	0	0	0	0	0	0	0	RP1-144F13.4	ENSG00000225333.6_4	1	ENST00000497982.2_1	1
ENSG00000252413.1	chr1	40189238	40189299	-	62	0	0	0	0	0	0	0	0	0	0	0	0	RNU7-121P	ENSG00000252413.1	1	ENST00000516604.1	1
ENSG00000116985.11_3	chr1	40222854	40254533	-	4822	137	230	236	240	96	77	65	131	214	256	181	179	BMP8B	ENSG00000116985.11_3	1	ENST00000372827.7_1	7
ENSG00000198754.5_3	chr1	40235195	40237020	-	1826	0	5	16	4	6	0	0	4	9	40	0	5	OXCT2	ENSG00000198754.5_3	1	ENST00000327582.5_1	1
ENSG00000261798.1_4	chr1	40254648	40255843	+	1196	17	5	1	11	5	15	3	5	1	16	1	5	RP1-118J21.25	ENSG00000261798.1_4	1	ENST00000566366.1_1	1
ENSG00000229213.1_4	chr1	40261515	40261668	-	154	0	0	0	0	0	0	0	0	0	0	0	0	RP1-118J21.24	ENSG00000229213.1_4	1	ENST00000446772.1_1	1
ENSG00000284719.1_2	chr1	40265094	40275122	+	1744	0	4	3	7	8	10	22	0	13	6	17	29	RP1-118J21.27	ENSG00000284719.1_2	2	ENST00000641382.1_1,ENST00000641632.1_1	3,3
ENSG00000284678.1_2	chr1	40267086	40283132	-	673	0	0	0	0	0	0	0	0	0	0	3	0	RP1-118J21.28	ENSG00000284678.1_2	1	ENST00000641026.1_1	4
ENSG00000043514.15_2	chr1	40306694	40349183	-	2663	471	502	603	523	415	347	357	279	608	443	614	477	TRIT1	ENSG00000043514.15_2	15	ENST00000537440.5_1,ENST00000441669.6_2,ENST00000462797.5_1,ENST00000316891.9_1,ENST00000372818.5_2,ENST00000495175.6_1,ENST00000491865.5_1,ENST00000541099.5_1,ENST00000465417.5_1,ENST00000492612.6_1,ENST00000467774.1_1,ENST00000489945.5_1,ENST00000486825.6_1,ENST00000469476.2_1,ENST00000462243.2_1	10,9,10,11,10,8,5,4,5,9,2,7,8,6,3
ENSG00000202222.1	chr1	40347238	40347350	-	113	0	0	0	0	9	0	0	0	5	0	0	0	Y_RNA	ENSG00000202222.1	1	ENST00000365352.1	1
ENSG00000116990.10_3	chr1	40361098	40367928	-	5063	456	558	725	566	480	322	268	301	773	716	544	595	MYCL	ENSG00000116990.10_3	4	ENST00000397332.2_1,ENST00000372816.2_1,ENST00000372815.1_1,ENST00000450953.3_3	3,2,2,2
ENSG00000236546.1_4	chr1	40363417	40364770	+	785	5	0	0	2	0	0	2	3	0	0	0	0	RP1-118J21.5	ENSG00000236546.1_4	1	ENST00000418255.1_1	2
ENSG00000207356.1	chr1	40410562	40410670	-	109	0	0	0	0	0	0	0	0	0	0	0	0	Y_RNA	ENSG00000207356.1	1	ENST00000384626.1	1
ENSG00000168389.17_3	chr1	40420784	40435640	+	4007	32	54	84	68	102	38	17	59	127	105	66	108	MFSD2A	ENSG00000168389.17_3	10	ENST00000420632.6_1,ENST00000372811.9_1,ENST00000434861.5_3,ENST00000372809.5_1,ENST00000483824.5_1,ENST00000469745.5_1,ENST00000480630.5_1,ENST00000491515.5_1,ENST00000459917.1_1,ENST00000481612.1_1	12,14,7,14,12,8,9,6,3,2
ENSG00000228477.1_4	chr1	40428352	40429076	+	725	0	1	27	0	2	8	3	14	9	4	6	3	RP3-342P20.2	ENSG00000228477.1_4	1	ENST00000438210.1_1	1
ENSG00000131236.16_3	chr1	40505905	40538321	+	3814	3000	3470	4634	4364	3287	2844	2261	2241	3570	2919	3740	3516	CAP1	ENSG00000131236.16_3	19	ENST00000372797.7_2,ENST00000372802.5_2,ENST00000449311.5_3,ENST00000421589.5_3,ENST00000414893.5_2,ENST00000414281.5_3,ENST00000420216.5_3,ENST00000372792.6_2,ENST00000372798.5_2,ENST00000340450.7_2,ENST00000372805.7_2,ENST00000435719.5_3,ENST00000427843.5_3,ENST00000417287.5_3,ENST00000424977.1_3,ENST00000446031.1_2,ENST00000479759.5_1,ENST00000461993.1_1,ENST00000494114.1_1	13,13,6,7,6,8,8,13,13,13,13,8,9,8,8,3,7,5,2
ENSG00000131238.17_4	chr1	40537133	40563399	-	5088	1768	1896	2768	2227	1569	1185	934	1277	2087	1452	1827	1700	PPT1	ENSG00000131238.17_4	19	ENST00000642050.1_2,ENST00000641471.1_1,ENST00000530076.6_3,ENST00000641083.1_1,ENST00000530704.6_2,ENST00000433473.8_3,ENST00000641319.1_1,ENST00000439754.6_2,ENST00000641236.1_1,ENST00000641691.1_1,ENST00000449045.7_2,ENST00000529905.5_1,ENST00000641381.1_1,ENST00000372775.2_1,ENST00000641924.1_1,ENST00000527311.7_2,ENST00000372779.9_2,ENST00000526547.2_2,ENST00000641548.1_1	9,10,5,9,9,9,10,8,8,9,6,10,4,4,5,7,6,5,5
ENSG00000226745.2_4	chr1	40598436	40599120	+	685	0	0	0	0	0	0	0	0	0	0	0	0	RP11-115D7.3	ENSG00000226745.2_4	1	ENST00000430724.2_1	1
ENSG00000117000.8_2	chr1	40627045	40706593	+	6246	1615	1338	1854	1453	1388	1165	867	739	2058	1162	1786	1545	RLF	ENSG00000117000.8_2	1	ENST00000372771.4_1	8
ENSG00000207508.1	chr1	40643515	40643621	+	107	0	1	0	0	0	5	0	0	0	0	0	0	RNU6-1237P	ENSG00000207508.1	1	ENST00000384777.1	1
ENSG00000188800.5_2	chr1	40711619	40717363	+	889	0	0	0	2	0	0	0	0	0	0	0	0	TMCO2	ENSG00000188800.5_2	2	ENST00000468258.1_1,ENST00000372766.3_1	3,2
ENSG00000259943.1_4	chr1	40722099	40723639	-	1541	70	50	53	69	57	33	43	33	73	32	20	33	RP1-39G22.7	ENSG00000259943.1_4	1	ENST00000567508.1_1	1
ENSG00000084073.8_2	chr1	40723779	40759856	+	3572	206	164	190	185	130	158	121	72	231	220	282	273	ZMPSTE24	ENSG00000084073.8_2	4	ENST00000372759.3_1,ENST00000479131.5_1,ENST00000472583.1_1,ENST00000474142.1_1	10,4,4,2
ENSG00000231296.1_4	chr1	40728344	40728656	-	313	0	0	0	0	0	0	0	0	0	0	0	0	RP1-39G22.4	ENSG00000231296.1_4	1	ENST00000447743.1_1	1
ENSG00000049089.14_4	chr1	40766159	40783485	-	4217	32	46	29	32	9	18	0	8	30	21	40	34	COL9A2	ENSG00000049089.14_4	12	ENST00000372748.7_2,ENST00000482722.5_1,ENST00000466267.1_1,ENST00000427563.1_2,ENST00000488463.6_2,ENST00000417105.6_3,ENST00000496215.5_1,ENST00000372736.3_1,ENST00000461118.6_2,ENST00000642679.1_1,ENST00000490132.1_1,ENST00000495948.1_1	32,31,11,7,14,14,11,4,9,6,3,2
ENSG00000227311.3_4	chr1	40798750	40799229	-	480	0	0	0	0	0	4	0	0	0	0	0	0	RP1-228H13.1	ENSG00000227311.3_4	1	ENST00000600955.1_1	1
ENSG00000084070.11_3	chr1	40810522	40888998	+	3631	2940	3422	3887	3486	2741	2157	1917	1793	2673	2538	2377	2675	SMAP2	ENSG00000084070.11_3	6	ENST00000435168.6_1,ENST00000372718.7_1,ENST00000372708.5_1,ENST00000614549.4_1,ENST00000539317.2_1,ENST00000487871.1_1	7,10,10,10,10,2
ENSG00000213172.3_4	chr1	40830438	40830855	+	418	0	0	0	0	0	0	0	0	0	0	0	0	RP1-228H13.2	ENSG00000213172.3_4	1	ENST00000392713.3_1	1
ENSG00000284677.1_2	chr1	40901871	40915711	-	673	16	2	10	20	7	16	5	4	2	5	9	10	RP1-228H13.6	ENSG00000284677.1_2	1	ENST00000642138.1_1	5
ENSG00000187801.14_2	chr1	40915774	40929390	+	2386	32	27	56	44	23	13	28	26	70	90	67	41	ZFP69B	ENSG00000187801.14_2	4	ENST00000469416.1_1,ENST00000484445.5_1,ENST00000411995.6_1,ENST00000361584.4_1	5,5,6,5
ENSG00000260920.2_4	chr1	40929991	40932439	+	2449	355	450	712	617	424	371	276	292	716	771	811	693	RP1-228H13.5	ENSG00000260920.2_4	1	ENST00000565390.2_1	1
ENSG00000279667.1_4	chr1	40938727	40939731	+	1005	54	88	192	190	101	65	90	71	205	126	193	271	RP11-656D10.7	ENSG00000279667.1_4	1	ENST00000624658.1_1	1
ENSG00000187815.9_2	chr1	40942887	40962015	+	3248	161	201	222	132	134	109	116	78	156	195	137	138	ZFP69	ENSG00000187815.9_2	3	ENST00000372706.5_1,ENST00000372705.3_1,ENST00000482712.1_1	6,6,3
ENSG00000238287.1_4	chr1	40958829	40974333	-	605	0	0	0	0	0	0	0	0	1	0	0	0	RP11-656D10.3	ENSG00000238287.1_4	1	ENST00000450713.1_1	2
ENSG00000164002.11_4	chr1	40974413	40982228	+	3092	16	17	18	19	3	13	21	6	21	34	28	13	EXO5	ENSG00000164002.11_4	10	ENST00000358527.6_1,ENST00000372703.1_1,ENST00000420209.1_1,ENST00000296380.8_1,ENST00000432259.5_3,ENST00000418186.1_2,ENST00000415550.5_2,ENST00000443729.5_3,ENST00000419161.1_3,ENST00000471429.1_1	4,2,2,3,4,2,4,3,2,2
ENSG00000227278.1_4	chr1	40980133	40980729	-	432	1	0	0	4	0	0	7	0	1	0	1	0	RP11-656D10.5	ENSG00000227278.1_4	1	ENST00000453437.1_1	2
ENSG00000238186.1_4	chr1	40981426	40982846	-	546	0	0	3	14	0	0	0	0	3	14	0	9	RP11-656D10.6	ENSG00000238186.1_4	1	ENST00000437060.1_1	2
ENSG00000117010.15_2	chr1	40997233	41013841	+	3039	27	61	36	47	44	21	27	28	32	52	23	27	ZNF684	ENSG00000117010.15_2	6	ENST00000372699.7_1,ENST00000465152.1_1,ENST00000372697.7_1,ENST00000372696.3_1,ENST00000493756.1_1,ENST00000472043.1_1	5,4,5,5,3,2
ENSG00000236505.1_4	chr1	41029206	41029331	+	126	0	0	0	0	5	0	0	0	0	0	0	0	RP1-63P18.2	ENSG00000236505.1_4	1	ENST00000414105.1_1	1
ENSG00000233910.1_3	chr1	41059305	41060025	-	721	0	0	0	0	0	0	0	0	0	0	0	0	RP4-739H11.1	ENSG00000233910.1_3	1	ENST00000445825.1_1	1
ENSG00000117016.9_2	chr1	41086351	41131329	-	7235	454	573	393	283	432	283	301	399	495	457	342	394	RIMS3	ENSG00000117016.9_2	2	ENST00000372684.7_1,ENST00000372683.1_1	8,8
ENSG00000237899.1_4	chr1	41134761	41153260	-	471	0	0	2	2	0	0	0	0	3	0	0	0	RP4-739H11.3	ENSG00000237899.1_4	1	ENST00000440100.1_1	5
ENSG00000272145.1_4	chr1	41156052	41157738	-	1687	45	30	77	64	36	39	3	10	42	31	43	41	RP4-739H11.4	ENSG00000272145.1_4	1	ENST00000606277.1_1	1
ENSG00000066136.20_3	chr1	41157320	41237275	+	5990	1828	2225	2785	2385	1646	1386	867	1215	2329	1447	2642	2369	NFYC	ENSG00000066136.20_3	24	ENST00000467203.5_1,ENST00000424419.6_1,ENST00000427410.6_1,ENST00000447388.7_1,ENST00000425457.6_1,ENST00000453631.5_1,ENST00000456393.6_1,ENST00000372654.5_1,ENST00000534399.5_1,ENST00000372653.5_1,ENST00000372669.8_1,ENST00000372652.5_2,ENST00000372651.5_2,ENST00000531464.5_2,ENST00000440226.7_1,ENST00000525290.5_1,ENST00000530965.5_2,ENST00000416859.6_3,ENST00000308733.9_2,ENST00000414185.1_2…	6,5,9,10,11,6,10,11,5,15,9,10,10,5,10,5,3,5,10,5,3,3,2,2
ENSG00000198974.1	chr1	41220027	41220118	+	92	0	0	0	0	0	0	0	0	0	0	3	0	MIR30E	ENSG00000198974.1	1	ENST00000362104.1	1
ENSG00000207962.1	chr1	41222956	41223044	+	89	0	0	0	0	0	0	0	0	0	0	0	0	MIR30C1	ENSG00000207962.1	1	ENST00000385227.1	1
ENSG00000117013.15_3	chr1	41249486	41306124	+	4381	97	173	158	121	166	190	111	135	175	222	84	135	KCNQ4	ENSG00000117013.15_3	5	ENST00000642618.1_1,ENST00000347132.9_1,ENST00000509682.6_2,ENST00000443478.3_3,ENST00000506017.1_1	14,14,13,13,11
ENSG00000264582.1	chr1	41270518	41270811	+	294	0	0	0	0	0	0	0	2	1	0	1	7	RN7SL326P	ENSG00000264582.1	1	ENST00000477493.2	1
ENSG00000179862.6_2	chr1	41326723	41328038	-	1316	6	9	17	10	1	4	4	16	18	5	17	16	CITED4	ENSG00000179862.6_2	1	ENST00000372638.3_1	1
ENSG00000229528.1_4	chr1	41329586	41342342	+	471	0	0	0	0	0	0	0	0	0	0	0	0	RP5-1066H13.4	ENSG00000229528.1_4	1	ENST00000414199.1_1	3
ENSG00000228940.1_4	chr1	41403776	41405435	-	921	0	0	0	0	0	0	0	0	0	0	0	0	RP11-348A7.1	ENSG00000228940.1_4	1	ENST00000413739.1_1	3
ENSG00000233118.2_3	chr1	41407923	41408187	-	265	0	0	0	0	0	0	0	0	0	0	0	0	RP11-348A7.2	ENSG00000233118.2_3	1	ENST00000437166.2_1	1
ENSG00000171793.13_2	chr1	41445007	41478237	+	5462	708	961	1203	912	752	703	503	468	966	862	957	968	CTPS1	ENSG00000171793.13_2	12	ENST00000372621.8_1,ENST00000470271.5_1,ENST00000475060.1_1,ENST00000479480.5_1,ENST00000372616.1_1,ENST00000480420.5_1,ENST00000463285.5_1,ENST00000486889.1_1,ENST00000497210.5_1,ENST00000464283.5_1,ENST00000463423.5_1,ENST00000498694.1_1	19,3,2,7,18,6,6,3,3,8,6,5
ENSG00000281207.1_4	chr1	41480262	41509562	+	4800	45	19	83	91	43	34	11	26	40	80	29	34	SLFNL1-AS1	ENSG00000281207.1_4	1	ENST00000626479.1_1	4
ENSG00000171790.15_3	chr1	41481269	41488909	-	4310	5	1	7	17	0	0	0	3	1	8	0	12	SLFNL1	ENSG00000171790.15_3	5	ENST00000302946.12_1,ENST00000372613.6_2,ENST00000439569.2_1,ENST00000372611.5_1,ENST00000359345.5_1	5,3,6,6,4
ENSG00000010803.16_3	chr1	41492872	41707826	-	4447	3844	5061	5146	4135	3879	3647	2741	2760	4453	3455	4064	3985	SCMH1	ENSG00000010803.16_3	17	ENST00000397174.6_3,ENST00000402904.6_1,ENST00000397171.6_1,ENST00000361191.9_1,ENST00000361705.7_2,ENST00000326197.11_3,ENST00000372595.5_1,ENST00000337495.9_3,ENST00000372597.5_2,ENST00000372596.5_1,ENST00000472037.5_1,ENST00000456518.3_1,ENST00000460215.5_1,ENST00000498793.5_1,ENST00000489421.1_1,ENST00000482530.1_1,ENST00000488592.1_1	13,15,14,12,13,15,15,15,15,16,5,9,3,4,4,4,2
ENSG00000215893.3_3	chr1	41564310	41564808	+	499	0	3	5	0	0	2	0	0	0	0	0	1	RP4-635E8.1	ENSG00000215893.3_3	1	ENST00000401064.3_1	1
ENSG00000235358.1_4	chr1	41708045	41750533	+	1468	0	0	0	0	1	0	2	0	0	0	4	0	RP11-399E6.1	ENSG00000235358.1_4	3	ENST00000425554.1_1,ENST00000445073.1_1,ENST00000422305.1_1	3,2,3
ENSG00000213987.4_4	chr1	41730222	41730534	-	313	0	0	0	0	0	0	0	0	0	0	0	0	RP11-399E6.2	ENSG00000213987.4_4	1	ENST00000427711.2_1	1
ENSG00000204060.7_4	chr1	41827594	41849262	+	2398	18	14	11	29	11	24	10	28	43	59	33	17	FOXO6	ENSG00000204060.7_4	2	ENST00000372591.1_3,ENST00000641094.1_1	2,3
ENSG00000229901.1_4	chr1	41840676	41841341	-	394	0	0	0	0	0	0	0	0	0	0	0	0	RP11-399E6.4	ENSG00000229901.1_4	1	ENST00000429109.1_1	2
ENSG00000252563.1	chr1	41932608	41932699	-	92	0	0	0	0	0	0	0	0	0	0	0	0	RNA5SP45	ENSG00000252563.1	1	ENST00000516754.1	1
ENSG00000127129.9_2	chr1	41944446	41950344	-	1639	0	0	0	0	0	0	0	0	4	0	0	0	EDN2	ENSG00000127129.9_2	5	ENST00000372587.4_1,ENST00000490783.5_1,ENST00000467046.5_1,ENST00000467872.5_1,ENST00000460255.1_1	5,5,5,5,5
ENSG00000127124.15_4	chr1	41972036	42501596	-	14410	404	369	637	424	335	279	211	259	305	330	488	349	HIVEP3	ENSG00000127124.15_4	7	ENST00000643665.1_1,ENST00000372583.5_1,ENST00000372584.5_2,ENST00000460604.1_1,ENST00000491442.5_1,ENST00000489103.5_1,ENST00000479350.1_1	8,9,8,5,3,4,5
ENSG00000230881.1_4	chr1	42001114	42001539	+	265	0	0	0	0	0	0	0	0	0	0	0	0	RP11-486B10.3	ENSG00000230881.1_4	1	ENST00000440249.1_1	2
ENSG00000230638.4_4	chr1	42007740	42009981	+	2242	0	0	0	0	0	0	0	0	0	0	0	0	RP11-486B10.4	ENSG00000230638.4_4	1	ENST00000434240.2_1	1
ENSG00000284895.1_1	chr1	42050977	42094487	-	81	0	3	0	2	0	5	6	3	1	1	0	4	RP11-486B10.5	ENSG00000284895.1_1	1	ENST00000646142.1_1	2
ENSG00000264896.1	chr1	42224812	42224898	+	87	0	0	0	0	0	0	0	0	0	0	0	0	AL451006.1	ENSG00000264896.1	1	ENST00000390764.2	1
ENSG00000227538.1_3	chr1	42506268	42507400	+	1133	0	0	0	0	0	0	0	0	0	0	0	0	RP1-21K4.1	ENSG00000227538.1_3	1	ENST00000391730.2_1	1
ENSG00000228776.2_4	chr1	42606306	42607062	+	454	0	0	0	0	0	0	0	0	0	0	0	0	RP11-319C21.1	ENSG00000228776.2_4	1	ENST00000434936.2_1	2
ENSG00000044012.3_2	chr1	42619092	42621495	+	597	0	0	0	1	0	0	0	0	0	0	0	0	GUCA2B	ENSG00000044012.3_2	1	ENST00000372581.1_1	3
ENSG00000197273.3_2	chr1	42628362	42630389	-	569	0	0	0	0	0	0	0	0	0	0	0	0	GUCA2A	ENSG00000197273.3_2	1	ENST00000357001.2_1	3
ENSG00000198815.8_4	chr1	42642210	42801548	-	6893	2998	2926	3783	2829	2789	2397	1685	2005	3521	2185	3127	2903	FOXJ3	ENSG00000198815.8_4	9	ENST00000372571.5_1,ENST00000372572.5_3,ENST00000372573.5_2,ENST00000545068.5_2,ENST00000361776.5_2,ENST00000361346.5_2,ENST00000445886.5_2,ENST00000422278.1_1,ENST00000454417.1_1	3,15,13,13,12,13,8,3,2
ENSG00000227527.2_5	chr1	42801057	42804047	-	661	0	0	0	0	0	0	0	0	0	0	0	0	RP11-223A3.1	ENSG00000227527.2_5	1	ENST00000436207.2_1	2
ENSG00000177181.14_3	chr1	42846466	42888249	+	8981	125	121	162	117	170	148	63	71	263	269	264	282	RIMKLA	ENSG00000177181.14_3	2	ENST00000410070.6_3,ENST00000431473.3_1	5,5
ENSG00000235002.1_4	chr1	42878069	42878465	-	397	0	0	0	0	0	0	0	0	0	0	0	0	RP11-157D18.2	ENSG00000235002.1_4	1	ENST00000411908.1_1	1
ENSG00000066185.12_2	chr1	42896000	42921938	-	2195	38	52	35	58	16	19	20	1	35	24	14	14	ZMYND12	ENSG00000066185.12_2	4	ENST00000372565.7_1,ENST00000611861.4_1,ENST00000475426.1_1,ENST00000461083.1_1	8,7,2,3
ENSG00000127125.8_3	chr1	42921788	42939056	+	2590	178	132	157	174	123	151	102	112	139	168	151	149	PPCS	ENSG00000127125.8_3	8	ENST00000372562.1_1,ENST00000372560.3_1,ENST00000472013.1_1,ENST00000372561.3_1,ENST00000372556.3_1,ENST00000471420.1_1,ENST00000482168.1_1,ENST00000469615.1_1	3,2,2,3,3,3,2,2
ENSG00000186409.15_4	chr1	42929001	43120335	+	13504	53	56	50	52	61	40	24	23	117	115	29	103	CCDC30	ENSG00000186409.15_4	14	ENST00000475614.6_1,ENST00000477155.5_1,ENST00000340612.5_2,ENST00000468651.1_1,ENST00000492422.1_1,ENST00000462063.1_1,ENST00000428554.6_1,ENST00000495044.5_1,ENST00000507855.5_2,ENST00000509712.6_2,ENST00000471390.5_2,ENST00000342022.8_1,ENST00000514642.1_1,ENST00000471699.1_1	3,23,21,2,2,3,20,6,15,11,17,16,5,3
ENSG00000230116.1_4	chr1	42957410	42958164	+	755	0	0	0	0	0	0	0	0	0	0	0	0	RP11-163G10.2	ENSG00000230116.1_4	1	ENST00000426743.1_1	1
ENSG00000236876.3_3	chr1	42965876	42966010	-	135	0	0	0	0	0	0	0	0	0	0	0	0	RP11-163G10.3	ENSG00000236876.3_3	1	ENST00000424567.1_1	1
ENSG00000200254.1	chr1	43034704	43034810	+	107	0	0	0	0	0	0	0	0	0	0	0	0	RNU6-536P	ENSG00000200254.1	1	ENST00000363384.1	1
ENSG00000236180.2_4	chr1	43036641	43037061	+	421	0	0	0	13	0	0	0	0	0	0	0	0	RP11-163G10.4	ENSG00000236180.2_4	1	ENST00000454425.2_1	1
ENSG00000171960.10_3	chr1	43124096	43142429	+	1444	408	417	555	506	318	332	314	288	394	381	455	458	PPIH	ENSG00000171960.10_3	6	ENST00000304979.7_1,ENST00000372550.5_2,ENST00000440068.5_3,ENST00000372549.1_1,ENST00000436387.1_3,ENST00000461351.1_3	10,9,9,2,2,6
ENSG00000234917.2_4	chr1	43144406	43147330	+	601	15	19	8	4	5	5	10	0	14	16	3	9	RP5-994D16.3	ENSG00000234917.2_4	1	ENST00000414339.2_1	2
ENSG00000065978.18_3	chr1	43148098	43168020	+	1930	11317	13064	18254	14389	11814	10018	7652	7438	15725	13871	13840	13517	YBX1	ENSG00000065978.18_3	4	ENST00000321358.11_1,ENST00000332220.10_3,ENST00000436427.1_3,ENST00000467957.1_1	8,5,7,5
ENSG00000164007.10_3	chr1	43198764	43205925	-	3602	0	0	0	1	0	0	0	0	0	0	0	0	CLDN19	ENSG00000164007.10_3	3	ENST00000296387.5_2,ENST00000539749.5_1,ENST00000372539.3_2	5,3,4
ENSG00000117385.15_3	chr1	43212006	43232755	-	6766	2472	2950	3284	3142	2147	1735	1549	1613	2065	1739	1891	1897	P3H1	ENSG00000117385.15_3	14	ENST00000397054.7_2,ENST00000460031.5_1,ENST00000236040.8_2,ENST00000495874.5_1,ENST00000296388.9_2,ENST00000462474.5_1,ENST00000472802.1_1,ENST00000431412.3_1,ENST00000460831.1_1,ENST00000481465.3_1,ENST00000447502.2_1,ENST00000463465.1_1,ENST00000372526.2_1,ENST00000492956.1_1	15,14,14,15,15,3,2,8,2,4,4,6,3,2
ENSG00000164008.15_4	chr1	43232940	43245159	+	5263	149	142	205	182	179	169	118	91	121	178	174	150	C1orf50	ENSG00000164008.15_4	3	ENST00000372525.6_2,ENST00000468913.2_2,ENST00000494155.1_1	5,4,2
ENSG00000283580.2_4	chr1	43232963	43260164	+	1345	132	91	134	151	136	90	71	39	70	82	99	110	RP5-994D16.12	ENSG00000283580.2_4	2	ENST00000464081.1_2,ENST00000603943.6_3	6,5
ENSG00000228452.1_4	chr1	43241484	43242461	-	484	0	0	0	1	0	0	0	0	0	0	0	0	RP5-994D16.9	ENSG00000228452.1_4	1	ENST00000447572.1_1	2
ENSG00000274386.5_4	chr1	43250678	43282290	+	4373	23	17	42	84	15	8	26	9	21	69	61	35	TMEM269	ENSG00000274386.5_4	4	ENST00000421630.6_2,ENST00000637012.1_3,ENST00000536543.5_4,ENST00000605272.1_2	11,6,7,3
ENSG00000177868.11_2	chr1	43272723	43282923	-	1208	115	83	122	70	92	96	43	54	94	52	93	83	SVBP	ENSG00000177868.11_2	3	ENST00000372522.5_1,ENST00000372521.8_1,ENST00000497437.1_1	3,3,3
ENSG00000164010.14_5	chr1	43282759	43310664	+	5756	141	222	249	214	114	142	128	203	415	325	465	465	ERMAP	ENSG00000164010.14_5	9	ENST00000372517.7_4,ENST00000645239.1_1,ENST00000643061.1_1,ENST00000647120.1_1,ENST00000487556.6_2,ENST00000642150.1_1,ENST00000470938.1_1,ENST00000372514.7_4,ENST00000328249.3_4	12,4,3,10,11,8,2,11,9
ENSG00000228192.7_4	chr1	43300352	43312093	-	1617	46	86	69	79	62	53	27	45	72	72	159	100	RP11-342M1.3	ENSG00000228192.7_4	4	ENST00000414798.1_1,ENST00000416809.2_1,ENST00000444563.5_1,ENST00000425076.1_1	2,3,5,5
ENSG00000164011.17_3	chr1	43312244	43318148	+	2036	210	305	351	249	178	267	121	134	293	312	458	336	ZNF691	ENSG00000164011.17_3	8	ENST00000372502.5_1,ENST00000372508.7_1,ENST00000372507.5_1,ENST00000372506.5_1,ENST00000372504.5_3,ENST00000397034.3_1,ENST00000372503.2_1,ENST00000630961.1_3	4,2,3,4,5,4,2,2
ENSG00000233708.1_4	chr1	43352268	43354438	-	1962	0	0	0	2	0	0	0	0	0	0	0	0	RP11-342M1.7	ENSG00000233708.1_4	1	ENST00000448759.1_1	5
ENSG00000237090.1_4	chr1	43356765	43358101	-	1326	0	0	0	0	0	0	0	0	0	0	0	0	RP11-342M1.6	ENSG00000237090.1_4	1	ENST00000417517.1_1	2
ENSG00000225099.1_3	chr1	43368903	43369583	+	681	0	0	0	0	0	0	0	0	0	0	0	0	RP5-848E13.1	ENSG00000225099.1_3	1	ENST00000439215.1_1	1
ENSG00000117394.21_3	chr1	43391046	43424847	-	4724	785	794	1401	958	743	710	417	536	797	635	724	849	SLC2A1	ENSG00000117394.21_3	9	ENST00000426263.8_2,ENST00000630287.2_1,ENST00000475162.3_1,ENST00000625233.2_1,ENST00000372500.4_1,ENST00000415851.6_1,ENST00000630821.1_1,ENST00000629908.1_1,ENST00000460369.3_2	10,9,4,4,3,3,2,1,2
ENSG00000284138.1_3	chr1	43417873	43418312	-	440	38	63	106	27	60	31	26	43	37	32	33	42	RP5-848E13.5	ENSG00000284138.1_3	1	ENST00000639582.1_1	1
ENSG00000227533.5_3	chr1	43424720	43449029	+	3364	55	51	114	72	53	47	25	58	52	23	42	29	RP5-848E13.3	ENSG00000227533.5_3	2	ENST00000431759.5_1,ENST00000416689.1_1	4,3
ENSG00000283973.1_3	chr1	43424736	43427535	-	852	4	0	0	0	0	0	0	0	0	0	0	0	RP5-848E13.4	ENSG00000283973.1_3	2	ENST00000640236.1_1,ENST00000640492.1_1	5,6
ENSG00000207256.1	chr1	43457109	43457215	+	107	3	0	6	0	0	0	4	1	2	0	0	0	RNU6-880P	ENSG00000207256.1	1	ENST00000384526.1	1
ENSG00000252803.1	chr1	43489220	43489308	-	89	0	0	0	0	0	0	0	0	0	0	0	0	RNU6-870P	ENSG00000252803.1	1	ENST00000516994.1	1
ENSG00000277513.1_4	chr1	43569757	43570168	+	412	0	0	0	0	0	0	0	0	0	0	0	0	RP3-393B19.1	ENSG00000277513.1_4	1	ENST00000622380.1_1	1
ENSG00000186973.10_2	chr1	43610824	43622067	+	843	0	12	2	21	6	5	0	3	17	22	39	14	FAM183A	ENSG00000186973.10_2	6	ENST00000410048.5_1,ENST00000409337.5_1,ENST00000410025.5_1,ENST00000409396.5_2,ENST00000335282.4_1,ENST00000481753.1_1	4,3,4,4,4,2
ENSG00000117395.12_4	chr1	43629846	43736607	-	3561	189	208	271	214	180	175	156	181	346	224	299	307	EBNA1BP2	ENSG00000117395.12_4	9	ENST00000431635.6_2,ENST00000236051.2_2,ENST00000463906.1_1,ENST00000491223.5_1,ENST00000472982.5_1,ENST00000483082.1_1,ENST00000461557.2_1,ENST00000466927.5_1,ENST00000474566.1_1	10,9,6,5,3,2,9,3,5
ENSG00000243710.7_3	chr1	43637820	43720029	+	5764	6	5	8	6	1	15	0	4	28	23	20	17	CFAP57	ENSG00000243710.7_3	8	ENST00000372492.8_3,ENST00000528956.5_1,ENST00000610710.4_3,ENST00000529956.5_1,ENST00000525227.5_1,ENST00000533339.1_1,ENST00000534615.1_1,ENST00000428122.1_1	23,11,24,4,4,13,2,4
ENSG00000199240.1	chr1	43662088	43662207	+	120	0	0	0	0	0	0	0	0	0	0	0	0	RNA5SP46	ENSG00000199240.1	1	ENST00000362370.1	1
ENSG00000179178.10_3	chr1	43735665	43739673	+	2127	0	0	0	0	0	0	0	0	0	0	0	0	TMEM125	ENSG00000179178.10_3	4	ENST00000439858.5_1,ENST00000432792.6_1,ENST00000442284.1_1,ENST00000456751.1_3	4,4,2,3
ENSG00000253313.5_2	chr1	43747554	43751288	-	1516	0	0	0	0	0	0	0	0	0	0	2	0	C1orf210	ENSG00000253313.5_2	2	ENST00000523677.5_1,ENST00000423420.1_1	3,3
ENSG00000066056.13_2	chr1	43766664	43788779	+	6694	1	0	0	0	0	0	0	0	0	0	0	0	TIE1	ENSG00000066056.13_2	10	ENST00000372476.7_1,ENST00000538015.1_1,ENST00000485125.1_1,ENST00000480269.1_1,ENST00000488437.1_1,ENST00000471187.1_1,ENST00000461061.1_1,ENST00000473014.1_1,ENST00000492599.1_1,ENST00000492874.1_1	23,8,2,3,5,2,4,4,2,2
ENSG00000117400.17_4	chr1	43803520	43818443	+	2212	6	0	10	5	13	5	4	0	7	0	11	8	MPL	ENSG00000117400.17_4	4	ENST00000638732.1_1,ENST00000372470.8_2,ENST00000413998.7_2,ENST00000643351.1_1	10,12,12,4
ENSG00000234694.1_4	chr1	43820355	43824329	-	661	74	56	110	62	44	37	37	47	181	183	174	128	RP1-92O14.3	ENSG00000234694.1_4	1	ENST00000424948.1_1	3
ENSG00000117399.13_2	chr1	43824626	43828874	+	2038	2738	3140	4024	3181	2794	2892	1865	2391	3834	3627	3267	3620	CDC20	ENSG00000117399.13_2	4	ENST00000310955.10_1,ENST00000372462.1_1,ENST00000478882.1_1,ENST00000482046.1_1	11,10,4,3
ENSG00000066322.14_3	chr1	43829068	43833745	-	2507	1527	2099	1305	1260	1607	1308	886	999	1681	1389	1871	1693	ELOVL1	ENSG00000066322.14_3	16	ENST00000372458.7_1,ENST00000621943.4_1,ENST00000413844.3_1,ENST00000468865.6_1,ENST00000464204.5_1,ENST00000470968.6_1,ENST00000487209.5_1,ENST00000470769.5_1,ENST00000497569.5_1,ENST00000482302.5_1,ENST00000497050.5_1,ENST00000478481.5_1,ENST00000479439.5_1,ENST00000465321.5_1,ENST00000479686.5_1,ENST00000496932.1_1	8,8,7,6,8,6,7,8,8,9,8,4,6,7,5,4
ENSG00000159479.16_2	chr1	43849588	43855479	-	2704	194	85	200	171	175	133	124	89	137	241	223	211	MED8	ENSG00000159479.16_2	5	ENST00000290663.10_1,ENST00000372457.8_1,ENST00000372455.4_1,ENST00000460803.1_1,ENST00000473560.1_1	8,7,7,3,3
ENSG00000229431.1_4	chr1	43850784	43854826	+	731	1	12	2	17	6	10	0	0	2	0	1	0	RP1-92O14.6	ENSG00000229431.1_4	1	ENST00000436713.1_1	4
ENSG00000198198.15_4	chr1	43855553	43919918	+	25040	2311	3356	3629	3503	2056	2078	1547	1762	2439	1753	2240	2563	SZT2	ENSG00000198198.15_4	17	ENST00000372450.8_3,ENST00000634258.2_2,ENST00000562955.2_2,ENST00000638631.1_1,ENST00000406439.7_2,ENST00000357658.4_2,ENST00000639852.1_1,ENST00000470139.1_2,ENST00000478140.1_1,ENST00000638642.1_1,ENST00000638769.1_1,ENST00000639197.1_1,ENST00000470897.2_2,ENST00000471177.1_1,ENST00000638263.1_1,ENST00000460536.1_1,ENST00000640484.1_1	5,72,71,3,6,5,9,18,3,3,3,1,3,5,8,10,9
ENSG00000229372.1_4	chr1	43913447	43914315	-	699	0	0	0	0	0	0	0	2	1	1	0	0	RP11-506B15.4	ENSG00000229372.1_4	1	ENST00000396885.2_1	2
ENSG00000178922.16_2	chr1	43916674	43919660	-	2740	83	116	115	98	92	74	48	63	110	122	70	109	HYI	ENSG00000178922.16_2	13	ENST00000372425.8_1,ENST00000583037.5_1,ENST00000483618.1_1,ENST00000372433.5_1,ENST00000372434.5_2,ENST00000470662.5_1,ENST00000487366.5_1,ENST00000372430.7_1,ENST00000372432.5_1,ENST00000372427.5_1,ENST00000486909.1_1,ENST00000496142.1_1,ENST00000469587.1_1	8,9,2,8,9,7,7,8,8,6,7,3,2
ENSG00000229348.1_3	chr1	43919598	43922666	+	545	0	0	0	3	0	0	0	0	0	0	0	0	RP11-506B15.6	ENSG00000229348.1_3	1	ENST00000444386.1_1	2
ENSG00000142949.16_3	chr1	43990858	44089337	+	10712	6173	7959	6357	5139	5932	4548	3530	4028	6131	5082	6620	6101	PTPRF	ENSG00000142949.16_3	16	ENST00000496043.5_1,ENST00000481019.5_1,ENST00000617451.4_1,ENST00000359947.8_2,ENST00000438120.5_2,ENST00000436724.5_1,ENST00000372405.1_1,ENST00000437607.1_1,ENST00000467464.1_1,ENST00000412568.6_1,ENST00000429895.5_1,ENST00000414879.5_1,ENST00000496447.5_1,ENST00000372407.4_1,ENST00000463041.1_1,ENST00000477970.1_1	5,4,8,34,33,8,6,6,4,25,25,25,21,22,3,11
ENSG00000284989.1_1	chr1	44115820	44396686	+	4037	562	665	674	584	493	451	316	359	512	447	476	482	RP11-7O11.7	ENSG00000284989.1_1	1	ENST00000645057.1_1	26
ENSG00000066135.12_3	chr1	44115829	44171186	+	5172	451	429	603	405	330	356	287	294	460	497	446	428	KDM4A	ENSG00000066135.12_3	5	ENST00000372396.3_1,ENST00000463151.5_2,ENST00000485249.1_2,ENST00000472265.1_1,ENST00000481296.1_1	22,8,8,2,3
ENSG00000236200.5_4	chr1	44165436	44173809	-	1931	15	33	35	27	30	26	14	30	45	37	39	22	RP11-184I16.2	ENSG00000236200.5_4	5	ENST00000398804.7_1,ENST00000439057.5_1,ENST00000434346.1_1,ENST00000453015.1_1,ENST00000418149.1_1	5,5,3,2,2
ENSG00000126091.20_4	chr1	44171495	44396837	+	19475	543	619	697	532	485	398	346	317	438	427	377	404	ST3GAL3	ENSG00000126091.20_4	85	ENST00000532911.6_2,ENST00000646096.1_1,ENST00000347631.7_2,ENST00000643886.1_1,ENST00000643597.1_1,ENST00000372372.7_2,ENST00000361400.9_3,ENST00000545417.5_1,ENST00000330208.6_1,ENST00000335430.10_1,ENST00000372374.7_2,ENST00000643252.1_1,ENST00000647237.1_1,ENST00000642331.1_1,ENST00000361392.9_3,ENST00000646109.1_1,ENST00000533997.6_2,ENST00000353126.8_2,ENST00000643283.1_1,ENST00000642934.1_…	6,8,12,5,9,12,11,7,5,8,11,13,11,13,12,5,11,10,12,9,14,13,10,12,13,11,13,13,11,11,13,13,13,8,2,12,11,6,3,6,13,12,13,12,12,11,8,11,4,6,5,11,7,8,7,8,9,4,7,9,8,6,7,7,10,9,9,12,11,7,9,2,9,6,8,7,5,5,6,4,4,4,4,4,3
ENSG00000229444.1_4	chr1	44175063	44193014	-	469	0	0	0	0	0	0	0	0	0	0	0	0	RP11-184I16.4	ENSG00000229444.1_4	1	ENST00000437753.1_1	4
ENSG00000252201.1	chr1	44182138	44182227	+	90	0	0	0	0	0	0	0	0	0	0	0	0	RNU6-1058P	ENSG00000252201.1	1	ENST00000516392.1	1
ENSG00000233674.2_4	chr1	44209142	44209412	+	271	3	0	0	5	0	0	4	0	0	5	8	9	RP11-184I16.3	ENSG00000233674.2_4	1	ENST00000427515.2_1	1
ENSG00000224751.2_3	chr1	44315972	44317283	-	1312	0	0	0	0	0	0	0	0	0	0	0	0	RP4-654J19.1	ENSG00000224751.2_3	1	ENST00000419974.2_1	1
ENSG00000117407.16_4	chr1	44398992	44402913	+	2658	14	25	17	19	21	7	5	2	9	5	3	13	ARTN	ENSG00000117407.16_4	11	ENST00000414809.7_1,ENST00000372359.9_1,ENST00000477048.5_3,ENST00000471394.6_2,ENST00000498139.6_1,ENST00000491846.5_2,ENST00000479128.5_1,ENST00000472435.1_1,ENST00000474592.1_2,ENST00000372354.3_1,ENST00000438616.3_3	5,5,3,4,4,5,3,3,4,3,2
ENSG00000237950.1_4	chr1	44410042	44412223	-	557	0	5	2	1	2	5	7	6	9	1	0	5	RP11-7O11.3	ENSG00000237950.1_4	3	ENST00000446167.1_1,ENST00000445226.1_1,ENST00000412378.1_1	2,3,2
ENSG00000117408.10_2	chr1	44412611	44433694	+	5083	733	1070	1499	1250	814	928	403	575	1008	905	1137	1271	IPO13	ENSG00000117408.10_2	7	ENST00000372343.7_1,ENST00000489061.1_1,ENST00000489773.5_1,ENST00000492152.5_1,ENST00000480902.1_1,ENST00000372339.3_1,ENST00000486876.1_1	20,2,5,6,2,5,2
ENSG00000132768.13_2	chr1	44435672	44439041	+	2930	218	277	237	221	286	247	158	192	293	398	280	408	DPH2	ENSG00000132768.13_2	17	ENST00000471934.1_1,ENST00000476260.1_1,ENST00000255108.7_1,ENST00000524776.5_1,ENST00000530988.1_1,ENST00000495421.1_1,ENST00000527567.1_1,ENST00000492306.5_1,ENST00000490861.5_1,ENST00000396758.6_1,ENST00000477294.5_1,ENST00000529729.1_1,ENST00000532140.1_1,ENST00000534786.1_1,ENST00000534655.1_1,ENST00000459879.1_1,ENST00000527319.1_1	3,4,6,5,2,6,2,4,3,5,3,4,3,2,2,4,3
ENSG00000117410.13_3	chr1	44440159	44443967	+	3535	271	319	383	299	247	278	265	222	338	251	242	293	ATP6V0B	ENSG00000117410.13_3	13	ENST00000472505.6_2,ENST00000472174.6_1,ENST00000532642.5_1,ENST00000236067.8_1,ENST00000471859.6_1,ENST00000472277.5_1,ENST00000461670.5_1,ENST00000468183.5_1,ENST00000473485.5_1,ENST00000496131.1_1,ENST00000498208.1_1,ENST00000532072.1_1,ENST00000498664.1_1	5,8,7,7,7,5,5,6,7,5,4,2,6
ENSG00000117411.16_2	chr1	44444615	44456842	+	3772	2170	2500	2719	2247	2184	1714	1082	1438	2553	2168	2241	2410	B4GALT2	ENSG00000117411.16_2	8	ENST00000498543.1_1,ENST00000372324.5_1,ENST00000497866.5_1,ENST00000434555.6_1,ENST00000356836.10_1,ENST00000309519.8_1,ENST00000485678.5_1,ENST00000481924.1_1	2,7,3,7,7,7,5,3
ENSG00000159214.12_3	chr1	44457031	44462200	+	3554	81	98	108	97	89	100	89	53	190	225	130	160	CCDC24	ENSG00000159214.12_3	11	ENST00000486064.5_1,ENST00000372318.7_2,ENST00000460543.5_1,ENST00000463846.5_1,ENST00000490563.5_1,ENST00000490064.5_1,ENST00000486504.5_1,ENST00000485811.5_1,ENST00000466180.1_2,ENST00000479055.5_1,ENST00000472562.1_1	8,9,6,6,8,6,6,6,6,7,3
ENSG00000196517.11_4	chr1	44457172	44497139	-	5159	674	957	1168	1017	604	526	443	492	995	773	996	1029	SLC6A9	ENSG00000196517.11_4	11	ENST00000372307.7_1,ENST00000372306.7_1,ENST00000372310.7_3,ENST00000475075.6_1,ENST00000360584.6_1,ENST00000357730.6_3,ENST00000492434.6_1,ENST00000528803.1_4,ENST00000489764.1_1,ENST00000466926.1_4,ENST00000533007.1_1	12,12,14,12,14,13,5,5,3,4,2
ENSG00000230615.6_5	chr1	44496115	44581585	+	7999	3	2	12	21	13	6	0	0	2	6	17	8	RP5-1198O20.4	ENSG00000230615.6_5	23	ENST00000623351.1_1,ENST00000624869.1_1,ENST00000607988.5_2,ENST00000609636.5_2,ENST00000609472.5_2,ENST00000610167.5_2,ENST00000434244.5_1,ENST00000630871.2_2,ENST00000626342.1_2,ENST00000626430.1_2,ENST00000628234.2_2,ENST00000616338.1_2,ENST00000431800.1_1,ENST00000437643.1_1,ENST00000453688.5_1,ENST00000447959.1_1,ENST00000609027.1_2,ENST00000630008.2_2,ENST00000627824.2_2,ENST00000625367.2_2…	2,2,4,4,3,3,7,3,2,3,5,2,3,4,4,2,5,3,3,3,3,4,3
ENSG00000227163.2_4	chr1	44553630	44554149	-	520	0	0	0	0	0	0	0	0	0	0	0	0	RP5-1198O20.5	ENSG00000227163.2_4	1	ENST00000436802.2_1	1
ENSG00000271647.1_2	chr1	44568978	44570375	-	1398	0	0	0	0	0	0	0	0	0	0	0	0	KRT8P47	ENSG00000271647.1_2	1	ENST00000604727.1_1	1
ENSG00000239560.2	chr1	44582772	44583069	-	298	0	0	0	0	0	0	0	0	0	0	0	0	RN7SL479P	ENSG00000239560.2	1	ENST00000472003.2	1
ENSG00000171872.4_2	chr1	44584522	44600812	+	3131	0	0	0	0	0	0	0	0	0	0	0	0	KLF17	ENSG00000171872.4_2	2	ENST00000372299.3_1,ENST00000476802.1_1	4,4
ENSG00000233514.1_4	chr1	44587825	44588184	-	360	0	0	0	0	0	0	0	0	0	0	0	0	RP11-570P14.1	ENSG00000233514.1_4	1	ENST00000402743.2_1	1
ENSG00000283039.1_2	chr1	44603493	44607303	-	3159	0	0	0	0	0	8	0	0	1	0	0	0	KLF18	ENSG00000283039.1_2	1	ENST00000634670.1_1	2
ENSG00000226804.4_4	chr1	44616266	44617425	-	1160	0	0	0	0	0	0	0	0	0	0	0	0	RP4-675G8.3	ENSG00000226804.4_4	1	ENST00000451975.2_1	1
ENSG00000200171.1	chr1	44619057	44619152	-	96	0	0	0	0	0	0	0	0	0	0	0	0	Y_RNA	ENSG00000200171.1	1	ENST00000363301.1	1
ENSG00000238037.1_3	chr1	44620700	44620973	-	274	0	0	0	0	0	0	0	0	0	0	0	0	RP4-675G8.4	ENSG00000238037.1_3	1	ENST00000423265.1_1	1
ENSG00000227994.1_4	chr1	44638178	44638391	-	214	0	0	0	0	0	0	0	0	0	0	0	0	RP5-891H21.1	ENSG00000227994.1_4	1	ENST00000442754.1_1	1
ENSG00000271329.1_4	chr1	44653615	44654721	-	796	0	4	0	0	0	0	1	0	0	0	2	0	RP5-891H21.5	ENSG00000271329.1_4	1	ENST00000603887.1_1	2
ENSG00000178028.13_3	chr1	44679127	44686353	+	5599	877	939	1035	909	732	695	548	549	809	947	889	756	DMAP1	ENSG00000178028.13_3	15	ENST00000361745.10_2,ENST00000446292.5_3,ENST00000440641.5_3,ENST00000436069.5_1,ENST00000437511.5_2,ENST00000475794.5_1,ENST00000471829.5_1,ENST00000487922.5_1,ENST00000315913.9_2,ENST00000372289.6_2,ENST00000463950.1_1,ENST00000372290.4_1,ENST00000488433.5_1,ENST00000483741.1_1,ENST00000494092.1_1	11,7,6,5,8,5,5,6,11,10,3,4,7,5,4
ENSG00000117419.14_3	chr1	44686742	44820932	-	2642	1086	1437	1469	1285	1271	895	720	984	957	1030	841	1002	ERI3	ENSG00000117419.14_3	9	ENST00000456170.5_1,ENST00000372259.9_1,ENST00000372257.6_1,ENST00000489710.1_1,ENST00000479101.1_1,ENST00000462341.1_1,ENST00000452396.5_1,ENST00000495828.1_1,ENST00000457571.1_1	7,7,9,3,3,3,6,6,6
ENSG00000233602.1_4	chr1	44709080	44709945	-	619	21	14	20	14	23	14	24	10	13	16	15	38	RP5-891H21.4	ENSG00000233602.1_4	1	ENST00000414156.1_1	2
ENSG00000252146.1	chr1	44798777	44798850	-	74	7	1	10	4	9	2	5	10	23	1	2	1	AL390776.1	ENSG00000252146.1	1	ENST00000516337.1	1
ENSG00000199385.1	chr1	44856394	44856495	+	102	0	0	0	0	0	0	0	0	0	0	0	0	RNU6-369P	ENSG00000199385.1	1	ENST00000362515.1	1
ENSG00000187147.17_3	chr1	44870866	45117396	+	9687	1582	2032	1919	1703	1587	1310	1226	1158	1732	1651	1680	1731	RNF220	ENSG00000187147.17_3	18	ENST00000355387.6_1,ENST00000361799.6_1,ENST00000372247.6_1,ENST00000487332.1_1,ENST00000470498.1_1,ENST00000496262.1_1,ENST00000453863.5_2,ENST00000335497.11_1,ENST00000440132.2_1,ENST00000474064.5_1,ENST00000471494.5_1,ENST00000488865.2_1,ENST00000497469.5_1,ENST00000475378.5_1,ENST00000484745.5_1,ENST00000474394.5_1,ENST00000480686.5_1,ENST00000474956.1_1	15,15,16,3,2,3,4,9,10,10,6,4,5,10,10,8,6,2
ENSG00000263381.1	chr1	45011165	45011224	+	60	0	0	0	0	0	0	0	0	0	0	0	0	MIR5584	ENSG00000263381.1	1	ENST00000581357.1	1
ENSG00000126106.13_2	chr1	45100910	45140227	-	3635	100	162	106	83	64	48	78	62	119	66	112	84	TMEM53	ENSG00000126106.13_2	9	ENST00000372242.7_1,ENST00000372243.7_1,ENST00000372244.3_1,ENST00000495630.1_1,ENST00000476724.1_1,ENST00000468117.1_1,ENST00000372237.7_1,ENST00000372235.7_1,ENST00000420706.1_1	5,4,3,2,2,2,3,3,3
ENSG00000198520.10_5	chr1	45140364	45191263	+	3166	18	60	26	41	69	29	12	14	56	82	57	54	C1orf228	ENSG00000198520.10_5	20	ENST00000424484.5_1,ENST00000418644.5_5,ENST00000455805.5_1,ENST00000458657.6_3,ENST00000441519.5_5,ENST00000357508.5_1,ENST00000535358.5_3,ENST00000445071.5_4,ENST00000453711.1_5,ENST00000421398.5_1,ENST00000444751.5_1,ENST00000434068.1_3,ENST00000434520.5_1,ENST00000427321.1_1,ENST00000446792.1_1,ENST00000444525.1_1,ENST00000440383.1_1,ENST00000427336.1_1,ENST00000418779.5_1,ENST00000568406.1_1	6,6,5,13,6,10,12,6,4,5,6,5,3,3,3,2,2,2,4,4
ENSG00000199377.1	chr1	45187458	45187574	-	117	0	0	0	0	0	1	0	0	0	0	0	0	RNU5F-1	ENSG00000199377.1	1	ENST00000362507.1	1
ENSG00000200169.1	chr1	45196727	45196842	-	116	0	0	0	0	0	0	3	0	2	6	0	0	RNU5D-1	ENSG00000200169.1	1	ENST00000363299.1	1
ENSG00000142945.12_3	chr1	45205490	45233439	+	3646	1498	1462	1378	1165	1176	824	732	635	1369	1282	1780	1385	KIF2C	ENSG00000142945.12_3	8	ENST00000452259.5_1,ENST00000372224.8_2,ENST00000493027.5_1,ENST00000455186.5_2,ENST00000480574.1_1,ENST00000372217.5_2,ENST00000423289.1_1,ENST00000472235.1_1	11,21,10,10,5,20,5,3
ENSG00000225721.5_4	chr1	45224709	45241482	-	765	7	5	10	1	13	18	6	11	26	68	48	28	RP11-269F19.2	ENSG00000225721.5_4	2	ENST00000440985.5_1,ENST00000428791.1_1	3,3
ENSG00000142937.11_2	chr1	45240923	45244451	+	2847	16593	17023	17359	15580	16069	11743	8604	10349	20787	16154	22261	18455	RPS8	ENSG00000142937.11_2	8	ENST00000497035.5_1,ENST00000396651.7_1,ENST00000372209.3_1,ENST00000470475.1_1,ENST00000485390.5_1,ENST00000464658.1_1,ENST00000484599.1_1,ENST00000474582.1_1	5,6,6,3,5,3,2,2
ENSG00000264294.1	chr1	45241536	45241615	+	80	8	0	2	9	1	0	0	5	0	0	2	6	SNORD55	ENSG00000264294.1	1	ENST00000581525.1	1
ENSG00000200913.1	chr1	45242162	45242265	+	104	6	12	1	6	23	13	3	0	6	4	5	8	SNORD46	ENSG00000200913.1	1	ENST00000364043.1	1
ENSG00000202031.1	chr1	45243515	45243584	+	70	56	21	21	0	21	4	6	7	4	12	8	13	SNORD38A	ENSG00000202031.1	1	ENST00000365161.1	1
ENSG00000207421.1	chr1	45244062	45244128	+	67	27	8	10	1	2	2	22	0	15	1	13	7	SNORD38B	ENSG00000207421.1	1	ENST00000384690.1	1
ENSG00000234093.3_3	chr1	45246003	45246387	-	385	1	0	0	1	0	0	0	0	0	0	0	0	RP11-269F19.4	ENSG00000234093.3_3	1	ENST00000594193.1_1	1
ENSG00000142959.4_2	chr1	45249257	45253377	-	2047	0	7	6	4	4	9	5	3	2	9	6	5	BEST4	ENSG00000142959.4_2	1	ENST00000372207.3_1	9
ENSG00000173846.12_2	chr1	45265897	45271662	+	3479	107	146	175	128	126	144	59	93	394	334	439	330	PLK3	ENSG00000173846.12_2	7	ENST00000372201.4_1,ENST00000465443.5_1,ENST00000476731.1_1,ENST00000492398.5_1,ENST00000461358.5_1,ENST00000461769.1_1,ENST00000493100.1_1	15,14,5,7,5,3,2
ENSG00000188396.3_3	chr1	45271585	45272347	-	763	0	0	0	0	0	0	0	0	0	0	0	0	RP11-269F19.9	ENSG00000188396.3_3	1	ENST00000339355.2_1	1
ENSG00000222009.8_2	chr1	45274154	45281257	+	3520	16	4	5	21	14	12	2	9	56	96	70	61	BTBD19	ENSG00000222009.8_2	9	ENST00000450269.5_1,ENST00000409335.6_1,ENST00000439563.2_1,ENST00000485668.5_1,ENST00000482715.5_1,ENST00000475105.5_1,ENST00000495433.1_1,ENST00000489976.1_1,ENST00000464114.1_1	8,6,7,4,6,4,5,2,2
ENSG00000117425.13_2	chr1	45285516	45308735	-	5149	78	87	104	45	73	97	24	67	202	153	148	179	PTCH2	ENSG00000117425.13_2	3	ENST00000438067.5_1,ENST00000447098.6_1,ENST00000372192.3_1	5,23,22
ENSG00000202444.1	chr1	45285555	45285669	-	115	0	0	0	0	0	0	0	0	0	0	0	0	RNU5E-6P	ENSG00000202444.1	1	ENST00000365574.1	1
ENSG00000226499.1_4	chr1	45309593	45309754	-	162	24	35	48	25	20	9	17	16	37	51	52	38	RP5-882O7.1	ENSG00000226499.1_4	1	ENST00000447970.1_1	1
ENSG00000070785.16_3	chr1	45316194	45452394	-	3411	144	169	231	211	150	163	158	148	267	201	235	182	EIF2B3	ENSG00000070785.16_3	10	ENST00000620860.4_1,ENST00000439363.5_1,ENST00000360403.6_1,ENST00000486491.1_1,ENST00000372183.7_1,ENST00000480675.5_1,ENST00000477953.5_1,ENST00000372182.6_1,ENST00000487532.5_1,ENST00000497010.1_1	11,7,12,3,10,7,7,5,4,5
ENSG00000266294.1	chr1	45378740	45378844	-	105	0	0	0	0	0	0	0	0	0	0	0	0	AL136380.1	ENSG00000266294.1	1	ENST00000579017.1	1
ENSG00000253039.1	chr1	45397995	45398103	+	109	0	0	0	0	0	0	0	0	0	0	0	0	RNA5SP47	ENSG00000253039.1	1	ENST00000517230.1	1
ENSG00000229815.1_3	chr1	45424229	45425067	+	839	0	0	0	0	0	0	0	0	0	0	0	0	RP5-882O7.3	ENSG00000229815.1_3	1	ENST00000428976.1_1	1
ENSG00000232369.1_4	chr1	45453906	45454397	-	492	1	0	0	0	0	0	0	0	0	0	0	0	RP5-882O7.4	ENSG00000232369.1_4	1	ENST00000411837.1_1	1
ENSG00000268949.1_3	chr1	45454377	45457506	-	3130	0	0	0	0	0	0	0	0	0	1	0	0	RP5-882O7.5	ENSG00000268949.1_3	1	ENST00000596009.1_1	1
ENSG00000126107.14_2	chr1	45468212	45477001	-	5077	708	964	1696	1657	933	945	708	621	634	575	919	867	HECTD3	ENSG00000126107.14_2	7	ENST00000486132.5_1,ENST00000372168.7_1,ENST00000372172.4_1,ENST00000486296.5_1,ENST00000466423.5_1,ENST00000487488.5_1,ENST00000484564.1_1	6,13,21,6,7,3,3
ENSG00000126088.13_3	chr1	45477819	45481247	+	2908	1087	1184	1320	1207	1164	993	736	806	1145	1255	1341	1104	UROD	ENSG00000126088.13_3	22	ENST00000246337.8_1,ENST00000491773.5_1,ENST00000463092.5_1,ENST00000636293.1_1,ENST00000636836.1_1,ENST00000461035.5_1,ENST00000491300.5_1,ENST00000434478.5_3,ENST00000494399.5_1,ENST00000460334.5_1,ENST00000462688.5_1,ENST00000460906.5_1,ENST00000490385.5_1,ENST00000469548.5_1,ENST00000486699.5_1,ENST00000478467.5_1,ENST00000428106.1_3,ENST00000496439.1_1,ENST00000473012.1_1,ENST00000472254.1_1…	10,6,3,9,9,4,7,6,7,6,6,5,5,7,7,6,6,4,4,4,2,2
ENSG00000162415.6_3	chr1	45482071	45771881	-	6046	173	355	391	280	113	95	74	104	149	98	222	128	ZSWIM5	ENSG00000162415.6_3	2	ENST00000359600.5_1,ENST00000464588.1_1	14,3
ENSG00000264650.1	chr1	45499641	45499692	-	52	0	0	0	0	0	0	0	0	0	0	0	0	AL359473.1	ENSG00000264650.1	1	ENST00000583502.1	1
ENSG00000234315.1_3	chr1	45535649	45536101	-	453	0	0	0	0	0	0	0	0	0	8	0	0	RP11-69J16.4	ENSG00000234315.1_3	1	ENST00000425293.1_1	1
ENSG00000221707.2	chr1	45697890	45697979	-	90	0	0	0	0	0	0	0	0	0	0	0	0	AL592294.1	ENSG00000221707.2	1	ENST00000408780.2	1
ENSG00000281912.1_2	chr1	45769582	45771291	+	1710	186	213	233	175	163	136	82	136	172	183	157	150	LINC01144	ENSG00000281912.1_2	1	ENST00000626198.1_1	1
ENSG00000186603.5_2	chr1	45792577	45794205	+	1629	0	0	0	0	0	0	0	0	0	0	0	0	HPDL	ENSG00000186603.5_2	1	ENST00000334815.4_1	1
ENSG00000132781.17_4	chr1	45794835	45806142	-	3909	293	344	378	392	270	331	255	209	453	447	437	483	MUTYH	ENSG00000132781.17_4	39	ENST00000529984.5_1,ENST00000485271.5_3,ENST00000372104.5_1,ENST00000448481.5_3,ENST00000456914.6_1,ENST00000475516.5_1,ENST00000354383.10_3,ENST00000355498.6_1,ENST00000372098.7_3,ENST00000481571.5_1,ENST00000372110.7_3,ENST00000372115.7_3,ENST00000488731.6_1,ENST00000450313.5_3,ENST00000531105.5_1,ENST00000467459.5_1,ENST00000482094.5_1,ENST00000529892.5_3,ENST00000533178.5_3,ENST00000528013.6_…	7,4,17,16,16,16,16,16,16,16,16,16,7,16,3,8,5,6,10,16,7,5,3,9,10,10,10,5,7,5,5,5,4,5,5,3,5,4,2
ENSG00000132773.11_2	chr1	45805342	45809647	+	2742	169	218	314	235	167	226	118	137	249	213	345	314	TOE1	ENSG00000132773.11_2	5	ENST00000372090.5_1,ENST00000477731.5_1,ENST00000471337.5_1,ENST00000495703.5_1,ENST00000460057.1_1	8,7,7,8,4
ENSG00000070759.16_2	chr1	45809555	45956838	-	3322	247	343	517	467	226	210	165	186	212	193	238	295	TESK2	ENSG00000070759.16_2	4	ENST00000372084.5_1,ENST00000372086.3_1,ENST00000486676.5_1,ENST00000493974.1_1	9,11,10,3
ENSG00000238945.1	chr1	45824324	45824420	-	97	0	0	0	0	0	0	0	0	0	0	0	0	snoU13	ENSG00000238945.1	1	ENST00000459207.1	1
ENSG00000236872.1_4	chr1	45880692	45881016	+	325	0	0	0	0	0	0	0	0	0	0	0	0	RP11-291L19.1	ENSG00000236872.1_4	1	ENST00000435399.1_1	1
ENSG00000280670.2_3	chr1	45959538	45965751	-	2757	285	356	377	333	199	213	257	151	291	310	257	305	CCDC163P	ENSG00000280670.2_3	8	ENST00000626177.2_1,ENST00000625766.2_1,ENST00000629009.2_1,ENST00000626657.2_1,ENST00000629482.2_1,ENST00000628293.1_1,ENST00000628397.2_1,ENST00000629670.1_1	6,5,5,6,5,6,5,4
ENSG00000132763.14_2	chr1	45965725	45979054	+	5296	390	430	792	611	400	409	149	249	746	648	917	854	MMACHC	ENSG00000132763.14_2	3	ENST00000401061.8_1,ENST00000616135.1_2,ENST00000477188.1_1	4,5,2
ENSG00000117450.13_2	chr1	45976708	45988719	-	1522	1602	1828	2180	1826	2119	1488	1372	1120	2176	2129	2210	1911	PRDX1	ENSG00000117450.13_2	6	ENST00000262746.5_1,ENST00000319248.12_1,ENST00000372079.1_1,ENST00000447184.5_1,ENST00000424390.1_1,ENST00000483583.1_1	6,6,5,5,5,3
ENSG00000234379.1_3	chr1	45996599	45997811	+	598	0	0	0	0	0	0	0	0	0	0	0	0	RP4-697E16.1	ENSG00000234379.1_3	1	ENST00000446155.1_1	3
ENSG00000117448.13_3	chr1	46016215	46035721	+	3121	559	723	858	778	592	476	373	517	866	887	897	946	AKR1A1	ENSG00000117448.13_3	14	ENST00000372070.7_1,ENST00000621846.4_1,ENST00000434299.5_2,ENST00000496999.5_1,ENST00000476957.5_1,ENST00000481885.5_2,ENST00000351829.8_1,ENST00000471651.1_1,ENST00000497973.5_1,ENST00000473038.5_1,ENST00000495913.5_1,ENST00000487654.5_1,ENST00000475919.1_1,ENST00000475985.1_1	10,10,7,3,5,5,9,4,5,4,4,5,3,2
ENSG00000132780.16_4	chr1	46049518	46084576	+	8304	1451	1485	1896	1365	1339	1125	1529	996	1712	1796	1216	1257	NASP	ENSG00000132780.16_4	25	ENST00000437901.6_1,ENST00000537798.5_2,ENST00000437362.6_1,ENST00000464190.6_1,ENST00000528084.5_1,ENST00000527359.5_1,ENST00000530840.5_1,ENST00000531532.5_1,ENST00000529333.5_1,ENST00000527470.5_1,ENST00000525515.5_1,ENST00000453748.5_1,ENST00000528238.5_4,ENST00000534101.1_1,ENST00000350030.7_2,ENST00000470768.5_1,ENST00000372052.8_2,ENST00000629893.1_1,ENST00000351223.7_2,ENST00000530073.5_1…	10,13,10,5,6,7,4,6,7,4,6,12,8,6,15,5,13,3,14,10,9,9,2,5,2
ENSG00000159588.14_3	chr1	46085716	46089729	-	3323	50	147	97	73	58	51	17	29	97	148	150	117	CCDC17	ENSG00000159588.14_3	9	ENST00000372044.7_1,ENST00000482416.5_1,ENST00000491755.5_1,ENST00000421127.6_1,ENST00000528266.5_1,ENST00000445048.2_3,ENST00000479529.2_1,ENST00000464739.5_1,ENST00000525599.1_1	11,7,11,13,13,2,12,3,4
ENSG00000159592.10_3	chr1	46092976	46153785	-	7433	1991	2049	3236	2629	1719	1604	1225	1248	2394	1978	2501	2243	GPBP1L1	ENSG00000159592.10_3	14	ENST00000479235.5_1,ENST00000290795.7_1,ENST00000355105.7_1,ENST00000467032.1_1,ENST00000487436.1_1,ENST00000468724.1_1,ENST00000498128.1_1,ENST00000496278.1_1,ENST00000495616.1_1,ENST00000488278.5_1,ENST00000480941.1_1,ENST00000480083.5_1,ENST00000493083.5_1,ENST00000460859.1_1	5,12,13,2,3,3,4,2,2,3,2,3,3,2
ENSG00000225447.1_3	chr1	46111488	46111869	-	382	2	9	6	12	6	7	4	12	18	13	0	5	RP11-767N6.3	ENSG00000225447.1_3	1	ENST00000432472.1_1	1
ENSG00000234329.1_4	chr1	46116711	46117498	-	788	43	24	49	58	22	44	19	15	44	20	22	4	RP11-767N6.2	ENSG00000234329.1_4	1	ENST00000437848.1_1	1
ENSG00000159596.6_2	chr1	46152886	46160115	+	2439	1412	1588	2231	1496	1241	1113	812	952	1995	1353	1877	2061	TMEM69	ENSG00000159596.6_2	2	ENST00000372025.4_1,ENST00000496366.1_1	3,2
ENSG00000197429.10_3	chr1	46159996	46216322	-	3705	25	32	56	43	43	28	26	27	25	53	37	49	IPP	ENSG00000197429.10_3	4	ENST00000359942.8_1,ENST00000461718.5_1,ENST00000495072.1_1,ENST00000396478.3_1	10,2,3,9
ENSG00000230896.1_5	chr1	46160356	46162747	-	598	6	7	14	12	5	5	3	0	2	0	1	8	RP11-767N6.7	ENSG00000230896.1_5	1	ENST00000430643.1_1	2
ENSG00000236111.5_4	chr1	46246949	46247629	+	681	0	0	0	0	0	0	0	0	0	0	0	0	RP11-630I5.1	ENSG00000236111.5_4	1	ENST00000463059.1_1	1
ENSG00000086015.20_2	chr1	46252659	46501796	+	7877	1829	2347	3420	3141	1718	1413	947	1092	1779	1302	1866	1856	MAST2	ENSG00000086015.20_2	10	ENST00000470809.1_1,ENST00000361297.6_1,ENST00000372008.6_1,ENST00000482881.1_1,ENST00000488619.1_1,ENST00000372009.3_1,ENST00000467367.5_1,ENST00000498668.1_1,ENST00000477968.1_1,ENST00000492813.1_1	5,29,20,6,2,23,4,2,3,2
ENSG00000232467.2_3	chr1	46312666	46313266	-	601	0	0	0	0	0	0	0	0	0	0	0	0	RP11-735A5.1	ENSG00000232467.2_3	1	ENST00000413187.2_1	1
ENSG00000117461.14_3	chr1	46505812	46598708	-	7410	327	241	489	440	288	341	223	182	539	524	424	409	PIK3R3	ENSG00000117461.14_3	7	ENST00000262741.9_2,ENST00000372006.5_1,ENST00000420542.5_1,ENST00000488808.1_1,ENST00000423209.5_1,ENST00000493202.1_1,ENST00000425892.2_2	10,11,11,4,9,6,6
ENSG00000278139.1_5	chr1	46509333	46642160	-	1553	44	29	101	61	29	33	15	37	55	59	34	45	RP4-533D7.6	ENSG00000278139.1_5	1	ENST00000540385.2_1	10
ENSG00000226957.1_4	chr1	46512490	46514040	+	649	0	0	0	0	0	0	0	0	0	0	0	0	RP4-533D7.4	ENSG00000226957.1_4	1	ENST00000450004.1_1	2
ENSG00000233114.2_4	chr1	46570622	46570847	+	226	0	0	0	0	0	0	0	0	0	0	0	0	RP4-533D7.3	ENSG00000233114.2_4	1	ENST00000426289.2_1	1
ENSG00000227857.2_4	chr1	46600203	46604753	+	339	0	0	0	6	0	0	0	1	9	0	0	0	RP4-533D7.5	ENSG00000227857.2_4	1	ENST00000452785.2_1	2
ENSG00000117472.9_2	chr1	46640745	46651630	+	2366	5	0	10	0	0	0	0	0	0	9	18	0	TSPAN1	ENSG00000117472.9_2	9	ENST00000498443.5_1,ENST00000372003.5_1,ENST00000482928.5_1,ENST00000469330.5_1,ENST00000475163.5_1,ENST00000482143.5_1,ENST00000464786.5_1,ENST00000472170.1_1,ENST00000470318.1_1	7,9,3,6,8,3,6,5,3
ENSG00000250719.1_5	chr1	46641158	46642150	-	395	0	0	0	0	0	0	0	0	0	0	0	0	RP11-322N21.2	ENSG00000250719.1_5	1	ENST00000506599.1_1	2
ENSG00000085998.13_2	chr1	46654354	46685977	-	6198	520	734	593	585	448	375	334	396	554	411	577	636	POMGNT1	ENSG00000085998.13_2	10	ENST00000396420.7_1,ENST00000371984.7_1,ENST00000371992.1_1,ENST00000475642.1_1,ENST00000480972.1_1,ENST00000485714.1_1,ENST00000463030.1_1,ENST00000477114.1_1,ENST00000497439.5_1,ENST00000489985.1_1	19,22,23,2,4,6,2,3,8,5
ENSG00000171357.5_2	chr1	46669006	46686933	+	1854	20	39	39	28	37	15	18	8	13	24	15	10	LURAP1	ENSG00000171357.5_2	1	ENST00000371980.3_1	2
ENSG00000085999.11_3	chr1	46713360	46744145	+	3212	1922	2322	2435	1801	1938	1456	1382	1299	1582	1149	1531	1657	RAD54L	ENSG00000085999.11_3	12	ENST00000463715.5_3,ENST00000442598.5_1,ENST00000493985.5_2,ENST00000371975.8_1,ENST00000469835.5_3,ENST00000493032.5_1,ENST00000487700.1_1,ENST00000472889.2_3,ENST00000473251.2_1,ENST00000476687.2_3,ENST00000488942.5_1,ENST00000459678.2_3	7,19,7,18,8,5,5,5,6,6,7,7
ENSG00000132128.16_3	chr1	46726868	46769280	-	8606	1363	1598	1366	1231	1106	977	693	828	1486	1174	1480	1506	LRRC41	ENSG00000132128.16_3	8	ENST00000496156.5_1,ENST00000617190.4_2,ENST00000617760.4_1,ENST00000343304.10_2,ENST00000615587.4_3,ENST00000472710.2_1,ENST00000498402.2_1,ENST00000469150.1_1	7,10,8,10,10,8,5,2
ENSG00000173660.11_2	chr1	46769303	46782448	+	1408	787	937	1214	878	811	724	554	672	1054	973	975	935	UQCRH	ENSG00000173660.11_2	5	ENST00000311672.9_1,ENST00000489056.5_1,ENST00000486951.1_1,ENST00000496387.5_1,ENST00000460947.1_1	4,4,2,5,2
ENSG00000117481.10_3	chr1	46805849	46830824	+	8468	870	1130	1326	1174	824	738	484	629	1052	780	966	936	NSUN4	ENSG00000117481.10_3	9	ENST00000474844.5_1,ENST00000307089.7_1,ENST00000486270.5_1,ENST00000469918.5_1,ENST00000472157.1_1,ENST00000537428.2_1,ENST00000498008.5_1,ENST00000495427.1_2,ENST00000475281.1_1	6,5,5,5,2,6,6,6,2
ENSG00000225779.1_4	chr1	46836258	46836627	+	370	0	0	13	1	0	1	0	7	0	5	2	6	RP4-603I14.3	ENSG00000225779.1_4	1	ENST00000457027.1_1	1
ENSG00000117480.15_2	chr1	46859937	46879520	+	2776	11	15	37	77	38	26	6	8	14	27	30	7	FAAH	ENSG00000117480.15_2	6	ENST00000243167.8_1,ENST00000468718.5_1,ENST00000493735.5_1,ENST00000484697.5_1,ENST00000489366.2_1,ENST00000493636.1_1	15,5,8,8,4,3
ENSG00000232022.7_3	chr1	46897801	46948165	+	2476	110	83	147	97	78	74	35	81	73	68	33	67	RP5-1109J22.1	ENSG00000232022.7_3	7	ENST00000446499.1_1,ENST00000606395.1_1,ENST00000607656.5_1,ENST00000429784.2_1,ENST00000635298.1_1,ENST00000635606.1_1,ENST00000455247.1_1	12,4,4,6,4,2,2
ENSG00000224863.2_3	chr1	46912345	46916953	-	1398	0	7	0	0	0	0	0	0	0	0	0	0	RP5-1109J22.2	ENSG00000224863.2_3	2	ENST00000416581.1_1,ENST00000634819.1_1	3,4
ENSG00000197587.10_3	chr1	46972668	46979898	+	2896	372	594	392	315	423	379	306	303	605	688	542	646	DMBX1	ENSG00000197587.10_3	2	ENST00000371956.8_2,ENST00000360032.3_2	4,4
ENSG00000282881.1_4	chr1	46997838	46999286	-	1449	0	0	0	0	0	0	0	0	0	0	0	0	RP11-49P4.7	ENSG00000282881.1_4	1	ENST00000634804.1_1	1
ENSG00000269956.1_4	chr1	47004368	47035927	+	2445	0	0	0	0	0	0	0	0	0	0	0	0	MKNK1-AS1	ENSG00000269956.1_4	1	ENST00000602433.1_1	8
ENSG00000162456.9_3	chr1	47011316	47017199	-	2810	1	0	0	0	0	0	0	0	0	0	0	0	KNCN	ENSG00000162456.9_3	4	ENST00000294445.7_1,ENST00000524908.1_1,ENST00000481882.6_3,ENST00000396314.3_3	3,3,4,3
ENSG00000079277.19_4	chr1	47023080	47082515	-	8070	505	787	1197	923	693	633	417	476	957	1046	1118	969	MKNK1	ENSG00000079277.19_4	28	ENST00000341183.9_2,ENST00000342571.7_2,ENST00000371946.8_4,ENST00000371945.8_1,ENST00000524749.5_1,ENST00000528077.5_1,ENST00000428112.6_4,ENST00000532897.5_1,ENST00000530528.1_1,ENST00000531355.5_1,ENST00000470237.5_1,ENST00000524417.1_1,ENST00000460098.1_1,ENST00000532783.5_2,ENST00000496619.5_1,ENST00000528237.5_2,ENST00000526513.5_1,ENST00000484301.5_2,ENST00000486716.5_2,ENST00000480531.5_2…	12,11,14,13,3,11,12,6,2,10,4,2,3,7,8,7,8,6,5,4,5,5,3,4,4,2,4,3
ENSG00000142961.14_3	chr1	47073387	47082563	-	5916	23	18	28	39	35	15	33	8	65	84	38	96	MOB3C	ENSG00000142961.14_3	4	ENST00000319928.7_1,ENST00000271139.12_1,ENST00000371940.1_1,ENST00000477318.1_1	4,4,3,3
ENSG00000123472.12_4	chr1	47098409	47139539	-	5677	3223	2926	5013	4471	2429	2135	1547	1587	2335	1925	3609	2799	ATPAF1	ENSG00000123472.12_4	14	ENST00000576409.5_3,ENST00000492233.5_1,ENST00000542495.5_3,ENST00000371937.8_3,ENST00000574428.5_4,ENST00000526821.5_2,ENST00000529214.5_1,ENST00000329231.8_2,ENST00000534216.5_2,ENST00000532925.5_2,ENST00000474020.5_1,ENST00000487193.1_3,ENST00000525633.1_1,ENST00000460928.1_1	9,4,10,9,9,6,10,7,6,9,6,7,4,2
ENSG00000233647.2_3	chr1	47131582	47132047	-	466	98	60	79	44	69	32	26	33	66	40	46	50	RP11-8J9.1	ENSG00000233647.2_3	1	ENST00000419476.2_1	1
ENSG00000186118.8_3	chr1	47134527	47139266	+	1490	2	12	1	5	0	4	0	0	0	10	0	3	TEX38	ENSG00000186118.8_3	4	ENST00000564071.1_3,ENST00000334122.4_2,ENST00000415500.1_2,ENST00000564373.1_2	2,2,2,2
ENSG00000228237.5_4	chr1	47139708	47157770	+	584	0	0	0	0	0	0	0	0	0	0	0	0	RP11-8J9.4	ENSG00000228237.5_4	2	ENST00000442839.5_1,ENST00000418985.1_1	3,4
ENSG00000159658.10_2	chr1	47140831	47184736	-	6285	1445	1760	4321	3175	1447	1317	1194	1046	1318	1291	1674	1536	EFCAB14	ENSG00000159658.10_2	6	ENST00000371933.7_1,ENST00000479745.5_1,ENST00000487741.6_1,ENST00000481623.1_1,ENST00000459797.1_1,ENST00000484461.1_1	11,5,6,4,2,6
ENSG00000236476.2_4	chr1	47208001	47208805	+	805	0	0	0	0	0	0	0	0	0	0	0	0	RP11-8J9.5	ENSG00000236476.2_4	1	ENST00000419949.2_1	1
ENSG00000142973.13_2	chr1	47223510	47285085	+	3466	0	0	0	0	0	0	0	0	0	0	0	0	CYP4B1	ENSG00000142973.13_2	15	ENST00000546128.5_1,ENST00000413093.2_1,ENST00000640628.1_1,ENST00000534708.6_1,ENST00000371923.8_1,ENST00000271153.8_1,ENST00000529715.5_1,ENST00000464439.6_1,ENST00000371919.8_2,ENST00000614163.4_1,ENST00000526297.5_1,ENST00000452782.6_1,ENST00000468637.3_1,ENST00000481248.1_1,ENST00000497005.1_1	6,5,8,10,12,12,8,12,11,13,6,10,7,2,2
ENSG00000154198.14_4	chr1	47308767	47366109	-	1598	0	0	0	0	0	0	0	0	0	0	0	0	RP4-732G19.2	ENSG00000154198.14_4	2	ENST00000505841.5_1,ENST00000423332.1_3	12,12
ENSG00000238145.2_4	chr1	47357311	47358502	+	1192	0	0	0	0	0	0	0	0	0	0	0	0	RP11-346M5.1	ENSG00000238145.2_4	1	ENST00000437364.2_1	1
ENSG00000187048.12_3	chr1	47394849	47407156	-	3890	0	0	0	1	0	0	0	0	0	0	0	0	CYP4A11	ENSG00000187048.12_3	9	ENST00000310638.8_1,ENST00000475477.5_1,ENST00000371904.8_1,ENST00000462347.5_2,ENST00000474458.5_1,ENST00000468629.5_1,ENST00000465874.5_1,ENST00000371905.1_1,ENST00000496519.1_1	12,9,13,10,8,11,8,11,2
ENSG00000259832.1_3	chr1	47433351	47433546	-	196	0	0	0	0	0	0	0	0	0	0	0	0	RP11-346M5.6	ENSG00000259832.1_3	1	ENST00000563017.1_1	1
ENSG00000261196.1_3	chr1	47460054	47460174	-	121	0	0	0	0	0	0	0	0	0	0	0	0	RP11-346M5.5	ENSG00000261196.1_3	1	ENST00000568156.1_1	1
ENSG00000261593.1_3	chr1	47466570	47466759	-	190	0	0	0	0	0	0	0	0	0	0	0	0	RP11-346M5.4	ENSG00000261593.1_3	1	ENST00000567218.1_1	1
ENSG00000261290.1_3	chr1	47468667	47468820	-	154	0	0	0	0	0	0	0	5	0	0	0	0	RP11-346M5.3	ENSG00000261290.1_3	1	ENST00000569984.1_1	1
ENSG00000186377.7_2	chr1	47489240	47516423	+	2548	298	486	353	243	238	212	227	278	175	142	205	155	CYP4X1	ENSG00000186377.7_2	2	ENST00000371901.3_1,ENST00000466294.1_1	12,3
ENSG00000186160.4_2	chr1	47533160	47583991	+	1996	0	0	0	2	0	0	0	0	0	0	0	2	CYP4Z1	ENSG00000186160.4_2	2	ENST00000334194.3_1,ENST00000471598.1_1	12,3
ENSG00000225154.2_4	chr1	47540450	47541651	-	1202	4	0	0	0	0	0	0	0	3	0	0	0	RP11-184J23.2	ENSG00000225154.2_4	1	ENST00000445574.2_1	1
ENSG00000225506.2_4	chr1	47562325	47644943	-	921	3	9	3	2	4	0	3	0	0	5	0	2	RP1-18D14.3	ENSG00000225506.2_4	1	ENST00000444042.2_1	4
ENSG00000162365.11_3	chr1	47603107	47615413	+	3859	0	0	0	0	0	0	0	0	0	0	0	0	CYP4A22	ENSG00000162365.11_3	7	ENST00000490948.5_1,ENST00000485117.1_1,ENST00000371890.7_2,ENST00000619754.4_1,ENST00000294337.7_1,ENST00000371891.7_1,ENST00000620131.1_1	11,11,10,9,11,12,13
ENSG00000225514.1_3	chr1	47630182	47631592	-	671	1	0	7	5	0	0	0	8	12	16	0	9	RP1-18D14.2	ENSG00000225514.1_3	1	ENST00000438556.1_1	2
ENSG00000224805.2_4	chr1	47644922	47646011	+	661	0	20	13	4	11	2	4	1	9	15	18	26	RP1-18D14.4	ENSG00000224805.2_4	1	ENST00000429328.2_1	2
ENSG00000162366.7_2	chr1	47649265	47656716	-	1438	0	0	0	0	0	0	0	0	1	0	0	0	PDZK1IP1	ENSG00000162366.7_2	4	ENST00000489919.1_1,ENST00000294338.6_1,ENST00000491793.1_1,ENST00000371885.1_1	3,4,2,5
ENSG00000162367.11_2	chr1	47681962	47697892	-	5700	30	21	24	14	26	10	10	20	26	43	23	10	TAL1	ENSG00000162367.11_2	6	ENST00000371884.6_1,ENST00000294339.3_1,ENST00000459729.1_1,ENST00000464796.5_1,ENST00000481091.1_1,ENST00000465912.1_1	5,4,3,3,3,2
ENSG00000226252.1_4	chr1	47691469	47696422	+	4036	0	0	0	0	3	0	0	0	0	0	0	0	RP1-18D14.7	ENSG00000226252.1_4	1	ENST00000422216.1_1	2
ENSG00000123473.15_3	chr1	47715811	47779819	-	7291	2795	3209	4170	3191	2266	2143	1809	1908	2735	2006	2716	2810	STIL	ENSG00000123473.15_3	9	ENST00000360380.7_1,ENST00000337817.9_1,ENST00000371877.7_1,ENST00000396221.6_1,ENST00000447475.6_2,ENST00000418131.1_1,ENST00000436811.1_2,ENST00000433827.2_1,ENST00000413565.1_2	18,19,17,17,18,6,4,2,2
ENSG00000162368.13_2	chr1	47799469	47844511	+	3844	287	402	629	397	355	258	190	253	221	185	227	268	CMPK1	ENSG00000162368.13_2	5	ENST00000371873.9_1,ENST00000371871.8_1,ENST00000471289.2_1,ENST00000450808.2_1,ENST00000371870.3_1	6,5,2,5,3
ENSG00000225762.1_4	chr1	47846600	47874149	-	483	0	0	2	0	0	0	0	9	14	14	12	0	RP11-511I2.2	ENSG00000225762.1_4	1	ENST00000420876.1_1	3
ENSG00000186790.5_2	chr1	47881744	47883724	+	1981	0	3	2	0	0	7	0	10	0	0	0	4	FOXE3	ENSG00000186790.5_2	1	ENST00000335071.3_1	1
ENSG00000237424.1_4	chr1	47897805	47900313	-	2509	565	695	367	343	353	274	233	214	347	336	362	415	FOXD2-AS1	ENSG00000237424.1_4	1	ENST00000445551.1_1	1
ENSG00000186564.5_2	chr1	47901689	47906363	+	4675	38	60	99	70	56	36	23	29	70	67	91	80	FOXD2	ENSG00000186564.5_2	1	ENST00000334793.5_1	1
ENSG00000271355.1_4	chr1	47949370	47949834	-	465	0	0	0	0	0	0	0	0	0	0	0	0	RP4-666O22.3	ENSG00000271355.1_4	1	ENST00000604764.1_1	1
ENSG00000229554.2_3	chr1	47963566	47964013	-	448	0	0	0	0	0	0	0	0	0	0	0	0	RP4-666O22.1	ENSG00000229554.2_3	1	ENST00000413752.2_1	1
ENSG00000221346.1	chr1	47968176	47968311	+	136	0	0	0	0	0	0	0	0	0	0	0	0	AL356458.1	ENSG00000221346.1	1	ENST00000408419.1	1
ENSG00000227883.1_3	chr1	48015868	48016425	+	242	2	0	0	0	0	0	0	0	0	0	2	0	RP4-666O22.2	ENSG00000227883.1_3	1	ENST00000427294.1_1	2
ENSG00000221447.1	chr1	48086765	48086849	-	85	0	0	0	0	0	0	0	0	0	0	0	0	AL591415.1	ENSG00000221447.1	1	ENST00000408520.1	1
ENSG00000227947.1_3	chr1	48154135	48169055	+	815	8	10	9	10	4	6	0	14	6	6	28	34	RP11-543D5.1	ENSG00000227947.1_3	1	ENST00000454285.1_1	3
ENSG00000269113.3_3	chr1	48226200	48462567	-	7034	188	324	257	184	169	198	167	162	180	309	137	163	TRABD2B	ENSG00000269113.3_3	2	ENST00000606738.2_1,ENST00000435576.2_1	7,4
ENSG00000223814.1_5	chr1	48226804	48231219	-	407	0	0	6	0	0	4	0	0	0	0	1	0	RP11-543D5.2	ENSG00000223814.1_5	1	ENST00000438589.1_1	2
ENSG00000273395.1	chr1	48226979	48227290	-	312	0	0	0	0	0	0	0	0	0	0	0	0	FLJ00388	ENSG00000273395.1	1	ENST00000594280.1	1
ENSG00000225028.1_4	chr1	48283738	48285909	+	1807	0	0	0	0	0	0	0	0	0	0	0	0	RP11-330M19.1	ENSG00000225028.1_4	1	ENST00000445070.1_1	2
ENSG00000226133.6_5	chr1	48516331	48557408	+	1477	0	0	2	0	1	0	0	0	0	0	0	0	RP4-683M8.2	ENSG00000226133.6_5	3	ENST00000635446.1_1,ENST00000456803.5_1,ENST00000439795.1_1	6,4,3
ENSG00000231413.1_4	chr1	48544459	48547868	-	292	0	1	0	8	0	3	0	2	0	0	0	0	RP11-193P11.3	ENSG00000231413.1_4	1	ENST00000455238.1_1	2
ENSG00000237180.1_3	chr1	48555040	48555306	+	267	0	0	0	0	0	0	0	0	0	0	0	0	RP11-193P11.1	ENSG00000237180.1_3	1	ENST00000414953.1_1	1
ENSG00000242267.6_4	chr1	48561764	48648100	-	2010	0	0	9	3	0	0	0	0	0	0	0	0	SKINT1L	ENSG00000242267.6_4	4	ENST00000604015.1_2,ENST00000452503.1_1,ENST00000401057.7_1,ENST00000453388.1_2	2,5,4,5
ENSG00000279096.2_3	chr1	48567740	48570408	+	2669	0	0	0	0	0	0	0	0	0	0	0	0	RP5-1024N4.6	ENSG00000279096.2_3	2	ENST00000622918.1_1,ENST00000640049.1_1	1,1
ENSG00000269709.1	chr1	48569306	48569878	+	573	0	0	0	0	0	0	0	0	0	0	0	0	AL109659.1	ENSG00000269709.1	1	ENST00000601108.1	1
ENSG00000223720.2_4	chr1	48638644	48672529	+	651	0	0	0	0	0	0	0	0	0	0	0	0	RP5-1024N4.2	ENSG00000223720.2_4	1	ENST00000431986.2_1	5
ENSG00000117834.12_4	chr1	48688357	48714316	+	4535	0	0	0	9	0	0	0	0	0	0	0	2	SLC5A9	ENSG00000117834.12_4	10	ENST00000425816.5_1,ENST00000533824.5_3,ENST00000438567.6_3,ENST00000236495.9_3,ENST00000493837.6_1,ENST00000441260.2_2,ENST00000527929.1_1,ENST00000525901.1_1,ENST00000532322.5_1,ENST00000471020.1_1	13,15,14,15,12,10,3,3,4,5
ENSG00000272491.1_4	chr1	48693560	48695233	-	1674	0	0	0	9	0	0	4	0	0	0	0	0	RP5-1024N4.4	ENSG00000272491.1_4	1	ENST00000606809.1_1	1
ENSG00000279214.1_4	chr1	48727902	48728851	-	950	0	0	0	0	0	0	0	0	0	0	0	0	RP5-1024N4.5	ENSG00000279214.1_4	1	ENST00000624985.1_1	1
ENSG00000132122.11_4	chr1	48761044	48937880	-	5939	214	218	242	206	189	193	63	103	246	196	243	212	SPATA6	ENSG00000132122.11_4	11	ENST00000371847.7_2,ENST00000396199.7_1,ENST00000371843.7_2,ENST00000603831.5_1,ENST00000371841.1_1,ENST00000490850.1_1,ENST00000487629.1_1,ENST00000463938.5_1,ENST00000487543.2_1,ENST00000465990.5_1,ENST00000471975.2_2	13,12,13,9,7,7,2,6,6,4,5
ENSG00000224986.2_3	chr1	48790752	48791795	-	1044	0	0	2	2	0	6	8	0	8	6	3	2	RP11-252A4.2	ENSG00000224986.2_3	1	ENST00000452549.2_1	1
ENSG00000206700.1	chr1	48809881	48809987	+	107	0	0	0	0	0	0	0	0	0	0	0	0	RNU6-723P	ENSG00000206700.1	1	ENST00000383973.1	1
ENSG00000235105.1_4	chr1	48901639	48902895	+	1257	2	2	17	17	5	16	17	7	4	25	8	8	RP11-329A14.1	ENSG00000235105.1_4	1	ENST00000412769.1_1	1
ENSG00000223175.1	chr1	48913608	48913714	+	107	0	0	0	0	0	0	0	0	0	0	0	0	RNU4-61P	ENSG00000223175.1	1	ENST00000411243.1	1
ENSG00000232514.1_4	chr1	48962935	48963408	-	474	0	0	0	0	0	0	0	0	0	0	0	0	RP11-329A14.2	ENSG00000232514.1_4	1	ENST00000416622.1_1	1
ENSG00000186094.16_4	chr1	48998527	50489585	-	7462	1	3	0	2	0	0	0	0	0	0	11	0	AGBL4	ENSG00000186094.16_4	6	ENST00000371839.5_3,ENST00000334103.11_1,ENST00000416121.5_3,ENST00000371838.5_3,ENST00000371836.1_1,ENST00000497451.1_1	14,8,7,9,7,3
ENSG00000162373.12_3	chr1	49193195	49242641	-	2138	1	6	0	5	7	0	0	0	1	0	20	9	BEND5	ENSG00000162373.12_3	6	ENST00000371833.3_1,ENST00000476079.5_1,ENST00000463562.1_1,ENST00000476096.1_1,ENST00000480399.1_1,ENST00000489956.1_1	6,3,6,2,2,2
ENSG00000229846.2_4	chr1	49491267	49653257	+	793	0	0	0	0	0	0	0	0	0	0	0	0	RP11-141A19.1	ENSG00000229846.2_4	1	ENST00000456002.2_2	4
ENSG00000239144.1	chr1	49617064	49617175	+	112	0	0	0	0	0	0	0	0	0	0	0	0	snoU13	ENSG00000239144.1	1	ENST00000458796.1	1
ENSG00000230114.1_4	chr1	49723083	49734957	+	566	0	0	0	0	0	0	0	0	0	0	0	0	RP11-141A19.2	ENSG00000230114.1_4	1	ENST00000420071.1_1	4
ENSG00000225623.1_4	chr1	49839873	49937757	-	514	0	0	0	0	0	0	0	0	0	0	0	0	RP4-795A5.1	ENSG00000225623.1_4	1	ENST00000457061.1_1	4
ENSG00000237478.2_4	chr1	50156934	50157195	-	262	0	0	3	8	0	1	0	15	0	0	0	0	RP5-926E3.1	ENSG00000237478.2_4	1	ENST00000428836.2_1	1
ENSG00000215887.5_3	chr1	50307493	50312072	+	1966	0	0	0	0	0	0	0	0	0	0	0	0	RP5-1092E23.1	ENSG00000215887.5_3	1	ENST00000502859.1_1	3
ENSG00000221746.1	chr1	50447887	50447967	+	81	0	0	0	0	0	0	0	0	0	0	0	0	AL645730.1	ENSG00000221746.1	1	ENST00000408819.1	1
ENSG00000227839.1	chr1	50459990	50461874	+	1885	0	0	0	0	0	0	0	0	0	0	0	0	AL645730.2	ENSG00000227839.1	1	ENST00000448346.1	1
ENSG00000279324.1_4	chr1	50459990	50461890	+	1901	0	0	0	0	0	0	0	0	0	0	0	0	RP11-93G23.2	ENSG00000279324.1_4	1	ENST00000622945.1_1	1
ENSG00000233595.2_3	chr1	50482764	50483175	+	412	0	0	0	0	0	0	0	0	0	0	0	0	RP11-93G23.1	ENSG00000233595.2_3	1	ENST00000438595.2_1	1
ENSG00000162374.16_5	chr1	50513686	50669458	+	6963	0	0	0	0	0	0	0	0	0	0	0	0	ELAVL4	ENSG00000162374.16_5	11	ENST00000448907.6_1,ENST00000371827.5_4,ENST00000463650.1_1,ENST00000357083.8_1,ENST00000371824.5_3,ENST00000371823.8_2,ENST00000371821.5_3,ENST00000371819.1_3,ENST00000494555.1_1,ENST00000492299.1_1,ENST00000474675.1_1	7,7,2,7,7,7,7,7,3,3,4
ENSG00000230828.1_4	chr1	50580609	50580954	+	346	0	0	0	0	0	0	0	0	0	0	0	0	RP11-492I2.1	ENSG00000230828.1_4	1	ENST00000456070.1_1	1
ENSG00000237337.1_4	chr1	50639978	50641540	-	858	0	0	0	0	0	0	0	0	0	0	0	0	RP11-567C20.2	ENSG00000237337.1_4	1	ENST00000442477.1_1	2
ENSG00000233407.1_4	chr1	50671756	50688799	-	250	0	0	0	0	0	0	0	0	0	0	0	0	RP11-567C20.3	ENSG00000233407.1_4	1	ENST00000440897.1_1	2
ENSG00000284696.1_2	chr1	50695334	50786842	-	3489	0	4	0	0	0	0	0	0	0	0	0	0	RP11-567C20.5	ENSG00000284696.1_2	8	ENST00000641749.1_1,ENST00000641180.1_1,ENST00000641951.1_1,ENST00000641628.1_1,ENST00000642061.1_1,ENST00000641957.1_1,ENST00000641188.1_1,ENST00000641192.1_1	12,2,2,3,1,2,3,2
ENSG00000284645.1_2	chr1	50718241	50724666	+	3304	0	0	0	0	0	0	0	0	0	0	0	0	RP11-567C20.4	ENSG00000284645.1_2	1	ENST00000642132.1_1	3
ENSG00000234080.3_4	chr1	50791803	50792679	+	877	2	7	4	3	6	3	3	1	8	5	8	3	RP11-183G22.1	ENSG00000234080.3_4	1	ENST00000423464.1_1	1
ENSG00000229316.1_3	chr1	50864497	50865445	-	653	0	0	0	0	0	0	0	0	0	0	0	0	RP11-183G22.2	ENSG00000229316.1_3	1	ENST00000435986.1_1	2
ENSG00000225671.2_3	chr1	50871102	50871696	-	595	0	0	0	0	0	0	0	0	0	0	0	0	RP11-183G22.3	ENSG00000225671.2_3	1	ENST00000456841.2_1	1
ENSG00000142700.11_2	chr1	50883222	50889172	-	3225	5	8	0	8	0	0	2	8	2	3	5	10	DMRTA2	ENSG00000142700.11_2	2	ENST00000418121.5_1,ENST00000404795.3_1	2,3
ENSG00000271782.1	chr1	50902700	50902978	-	279	3	0	20	14	0	7	7	2	0	0	0	0	RP5-850O15.4	ENSG00000271782.1	1	ENST00000607815.1	1
ENSG00000185104.19_3	chr1	50902700	51425935	-	7545	1755	1934	2577	2424	1533	1199	851	916	647	509	782	658	FAF1	ENSG00000185104.19_3	5	ENST00000396153.6_2,ENST00000494400.5_1,ENST00000371778.5_1,ENST00000472808.1_1,ENST00000487898.1_1	19,14,16,7,7
ENSG00000225767.1_4	chr1	50927141	50936822	+	503	0	0	0	0	0	0	0	0	0	0	0	0	RP5-850O15.4	ENSG00000225767.1_4	1	ENST00000424664.1_1	5
ENSG00000202140.1	chr1	50965430	50965529	-	100	0	0	2	8	1	0	3	3	0	5	0	0	Y_RNA	ENSG00000202140.1	1	ENST00000365270.1	1
ENSG00000207194.1	chr1	51048076	51048183	+	108	0	0	0	0	0	0	0	0	0	0	0	0	RNU6-1026P	ENSG00000207194.1	1	ENST00000384465.1	1
ENSG00000252825.1	chr1	51215968	51216025	+	58	0	0	0	0	0	0	0	0	0	0	0	0	RNU6-1253P	ENSG00000252825.1	1	ENST00000517016.1	1
ENSG00000230585.2_3	chr1	51246012	51246822	+	811	0	0	0	0	0	0	0	0	0	0	0	0	RP11-220M1.1	ENSG00000230585.2_3	1	ENST00000453979.2_1	1
ENSG00000237130.1_3	chr1	51312140	51312509	+	370	0	0	0	0	0	0	0	0	0	0	0	0	RP11-220M1.2	ENSG00000237130.1_3	1	ENST00000381143.4_1	1
ENSG00000123080.10_2	chr1	51426417	51440305	+	3318	215	258	205	163	218	136	66	114	262	117	187	220	CDKN2C	ENSG00000123080.10_2	3	ENST00000262662.5_1,ENST00000396148.1_1,ENST00000371761.3_1	4,3,2
ENSG00000265538.1	chr1	51525509	51525577	+	69	0	0	0	0	0	0	0	0	0	0	0	0	MIR4421	ENSG00000265538.1	1	ENST00000578133.1	1
ENSG00000204006.8_4	chr1	51567906	51613758	+	1105	1	0	0	0	0	0	6	0	0	0	0	0	C1orf185	ENSG00000204006.8_4	4	ENST00000371759.6_2,ENST00000467127.5_4,ENST00000474016.1_1,ENST00000612209.1_2	5,5,4,4
ENSG00000200262.1	chr1	51572894	51573003	+	110	0	0	0	17	0	3	0	3	0	7	0	0	Y_RNA	ENSG00000200262.1	1	ENST00000363392.1	1
ENSG00000213478.2_3	chr1	51623460	51624143	-	684	0	0	0	0	0	0	0	0	0	0	0	0	CFLP2	ENSG00000213478.2_3	1	ENST00000440986.1_1	1
ENSG00000239101.1	chr1	51654135	51654223	+	89	0	0	0	0	0	0	0	0	0	0	0	0	AL162430.2	ENSG00000239101.1	1	ENST00000459498.1	1
ENSG00000221492.1	chr1	51656555	51656630	+	76	0	0	0	0	0	0	0	0	0	0	0	0	AL162430.1	ENSG00000221492.1	1	ENST00000408565.1	1
ENSG00000203356.2_3	chr1	51660767	51700768	-	2366	0	0	0	0	3	0	0	0	1	0	0	0	RP11-296A18.3	ENSG00000203356.2_3	1	ENST00000366181.2_1	2
ENSG00000238618.1	chr1	51696925	51697028	-	104	0	0	0	0	0	0	0	0	0	0	0	0	snoU13	ENSG00000238618.1	1	ENST00000459356.1	1
ENSG00000123091.4_2	chr1	51701943	51739127	+	3122	901	1091	1608	1045	895	705	520	457	1002	977	879	1106	RNF11	ENSG00000123091.4_2	3	ENST00000242719.3_1,ENST00000494873.1_1,ENST00000486691.1_1	3,2,2
ENSG00000233406.5_4	chr1	51716275	51717144	-	870	2	1	0	3	1	0	0	1	1	10	7	0	RP11-296A18.5	ENSG00000233406.5_4	1	ENST00000480705.1_1	1
ENSG00000236434.2_4	chr1	51730588	51731746	-	435	0	0	0	0	0	0	0	0	0	0	0	2	RP11-296A18.6	ENSG00000236434.2_4	1	ENST00000422306.2_1	2
ENSG00000085831.15_4	chr1	51752930	51810788	-	9362	371	322	380	285	329	276	146	162	493	445	472	336	TTC39A	ENSG00000085831.15_4	18	ENST00000530004.5_2,ENST00000447632.6_3,ENST00000413473.6_2,ENST00000262675.11_2,ENST00000371750.9_1,ENST00000534098.1_1,ENST00000525906.1_2,ENST00000431927.5_1,ENST00000371747.7_2,ENST00000262676.9_2,ENST00000524442.1_1,ENST00000411642.6_2,ENST00000439482.5_2,ENST00000422925.5_2,ENST00000380849.6_2,ENST00000401051.7_2,ENST00000532836.5_2,ENST00000527205.1_2	7,18,18,18,18,6,5,8,13,11,5,12,11,9,7,6,6,6
ENSG00000261664.5_4	chr1	51795326	51800996	+	1222	23	7	32	26	8	8	9	6	23	4	2	22	RP11-275F13.1	ENSG00000261664.5_4	2	ENST00000564479.5_1,ENST00000568425.1_1	3,3
ENSG00000085832.16_4	chr1	51819935	51985000	-	7440	1194	1437	1670	1392	1094	865	679	822	1070	656	996	1010	EPS15	ENSG00000085832.16_4	9	ENST00000371730.6_1,ENST00000371733.7_1,ENST00000486505.5_1,ENST00000478657.1_1,ENST00000493793.1_1,ENST00000371727.5_1,ENST00000464478.5_1,ENST00000471391.1_1,ENST00000465467.1_4	23,25,6,3,5,9,5,8,7
ENSG00000232027.2_4	chr1	51837942	51838896	+	955	0	0	0	0	0	0	0	0	0	0	0	0	RP11-275F13.3	ENSG00000232027.2_4	1	ENST00000422197.2_1	1
ENSG00000206595.1	chr1	51847980	51848086	+	107	0	0	0	0	0	0	0	0	0	0	0	0	RNU6-877P	ENSG00000206595.1	1	ENST00000383868.1	1
ENSG00000238140.1_4	chr1	51927393	51929088	+	678	0	0	0	0	0	0	0	0	0	0	0	0	RP11-253A20.1	ENSG00000238140.1_4	1	ENST00000424246.1_1	2
ENSG00000227070.1_4	chr1	51983981	52027301	+	476	0	0	24	4	3	3	0	0	0	0	2	1	RP11-191G24.1	ENSG00000227070.1_4	2	ENST00000415031.1_1,ENST00000426017.1_1	2,3
ENSG00000252032.1	chr1	52004297	52004401	-	105	0	0	0	0	0	0	0	0	0	0	0	0	RNU6-1281P	ENSG00000252032.1	1	ENST00000516223.1	1
ENSG00000227742.2_4	chr1	52027538	52060569	-	2704	0	1	0	0	0	0	2	0	0	0	4	0	RP11-191G24.2	ENSG00000227742.2_4	4	ENST00000431943.1_1,ENST00000641477.1_1,ENST00000641201.1_1,ENST00000641070.1_1	7,7,6,4
ENSG00000117859.18_5	chr1	52042851	52264099	+	9523	1195	1114	1754	1369	927	923	802	627	1300	1088	1475	1177	OSBPL9	ENSG00000117859.18_5	27	ENST00000371714.5_1,ENST00000435274.6_1,ENST00000447887.5_2,ENST00000495776.5_1,ENST00000428468.5_1,ENST00000453295.5_1,ENST00000489990.5_3,ENST00000484890.5_1,ENST00000534040.5_1,ENST00000532975.5_1,ENST00000527631.5_1,ENST00000531828.5_2,ENST00000361556.9_1,ENST00000473207.6_1,ENST00000533884.5_1,ENST00000481937.5_1,ENST00000526917.5_1,ENST00000462759.5_1,ENST00000486942.5_1,ENST00000467064.5_1…	26,23,24,23,24,23,12,6,7,8,8,21,20,8,8,7,9,20,19,3,6,8,15,5,8,5,6
ENSG00000236973.2_3	chr1	52172810	52173809	-	1000	0	0	0	0	0	0	0	0	0	0	0	0	RP4-657D16.4	ENSG00000236973.2_3	1	ENST00000426454.2_1	1
ENSG00000232846.1_3	chr1	52174734	52175612	+	879	1	14	14	21	7	11	3	2	6	15	8	12	RP4-657D16.5	ENSG00000232846.1_3	1	ENST00000424829.1_1	1
ENSG00000212624.1	chr1	52190447	52190568	-	122	0	0	0	0	0	0	0	0	0	0	0	0	SNORA26	ENSG00000212624.1	1	ENST00000391322.1	1
ENSG00000078618.21_3	chr1	52254863	52344609	-	6773	715	835	850	586	678	544	660	489	586	462	531	576	NRDC	ENSG00000078618.21_3	14	ENST00000440943.5_1,ENST00000352171.11_1,ENST00000354831.11_1,ENST00000539524.5_1,ENST00000544028.5_1,ENST00000485608.5_1,ENST00000464385.1_1,ENST00000475310.5_1,ENST00000497358.1_1,ENST00000483007.1_1,ENST00000473805.5_1,ENST00000475715.1_1,ENST00000491410.1_1,ENST00000468722.1_1	16,31,33,33,31,31,2,2,5,3,8,6,2,2
ENSG00000266993.3_5	chr1	52259606	52264826	+	1819	23	11	12	6	1	0	10	2	15	26	52	6	RP4-657D16.3	ENSG00000266993.3_5	4	ENST00000629102.1_2,ENST00000588291.1_1,ENST00000586761.2_1,ENST00000591675.1_1	2,2,2,2
ENSG00000272175.1_4	chr1	52266700	52266979	+	280	0	0	1	0	0	0	0	0	0	3	0	0	RP4-657D16.6	ENSG00000272175.1_4	1	ENST00000607338.1_1	1
ENSG00000212076.1	chr1	52302013	52302082	-	70	0	0	0	0	0	0	0	0	0	0	6	0	MIR761	ENSG00000212076.1	1	ENST00000390787.1	1
ENSG00000230604.2_3	chr1	52325450	52325807	+	358	0	0	0	0	0	0	0	0	0	0	0	0	RP11-470H9.1	ENSG00000230604.2_3	1	ENST00000442453.2_1	1
ENSG00000212174.1	chr1	52331305	52331381	+	77	0	0	0	0	0	0	0	0	0	0	0	0	Y_RNA	ENSG00000212174.1	1	ENST00000390872.1	1
ENSG00000265769.1	chr1	52366592	52366643	-	52	0	0	0	0	0	0	0	0	0	0	0	0	AL589663.1	ENSG00000265769.1	1	ENST00000581406.1	1
ENSG00000169213.6_2	chr1	52373628	52456436	-	12844	626	838	1575	1349	676	671	618	540	1028	1031	1195	1097	RAB3B	ENSG00000169213.6_2	1	ENST00000371655.3_1	5
ENSG00000200839.1	chr1	52439082	52439207	+	126	0	0	0	0	0	0	0	0	0	0	0	0	RNA5SP48	ENSG00000200839.1	1	ENST00000363969.1	1
ENSG00000229032.1_4	chr1	52446145	52446486	+	342	0	0	0	0	0	0	0	0	0	0	0	0	RP11-91A18.1	ENSG00000229032.1_4	1	ENST00000422551.1_1	1
ENSG00000264613.1	chr1	52461412	52461709	+	298	0	0	0	0	0	0	0	0	0	0	0	0	RN7SL290P	ENSG00000264613.1	1	ENST00000578661.1	1
ENSG00000117862.11_3	chr1	52485803	52521843	-	3630	2209	3001	3699	3003	2123	1872	1845	1722	2286	2083	2185	2198	TXNDC12	ENSG00000117862.11_3	5	ENST00000469458.5_1,ENST00000371626.8_1,ENST00000472624.5_1,ENST00000471493.1_1,ENST00000610127.1_1	3,7,8,2,3
ENSG00000198841.3_3	chr1	52497775	52499488	-	1714	305	325	394	281	375	270	106	168	298	311	422	315	KTI12	ENSG00000198841.3_3	1	ENST00000371614.1_1	1
ENSG00000223390.1_4	chr1	52499063	52509951	+	762	1	0	0	0	0	0	0	0	0	0	0	0	RP11-91A18.4	ENSG00000223390.1_4	1	ENST00000425802.1_1	2
ENSG00000228369.2_4	chr1	52516590	52518355	+	391	0	0	0	0	0	0	0	0	0	0	0	0	RP11-91A18.5	ENSG00000228369.2_4	1	ENST00000428794.1_1	3
ENSG00000134717.17_3	chr1	52521797	52556388	+	6022	1903	2006	3170	2424	1444	1265	1056	1049	2446	1830	2650	2315	BTF3L4	ENSG00000134717.17_3	8	ENST00000313334.12_2,ENST00000477828.6_1,ENST00000489308.6_1,ENST00000526132.5_1,ENST00000472944.6_2,ENST00000524414.5_1,ENST00000484036.1_2,ENST00000533836.1_1	6,7,5,5,5,3,5,5
ENSG00000157077.14_3	chr1	52607766	52812358	+	5809	511	473	742	770	387	302	253	300	373	377	439	426	ZFYVE9	ENSG00000157077.14_3	5	ENST00000287727.7_2,ENST00000361625.5_1,ENST00000357206.6_2,ENST00000371591.1_2,ENST00000469134.1_1	19,5,18,18,4
ENSG00000241745.2	chr1	52615777	52616089	+	313	0	0	0	6	0	0	0	0	0	0	0	0	RN7SL788P	ENSG00000241745.2	1	ENST00000460504.2	1
ENSG00000228407.2_4	chr1	52625933	52626272	-	340	0	0	0	0	0	0	0	0	0	0	0	0	RP4-800M22.1	ENSG00000228407.2_4	1	ENST00000414059.2_1	1
ENSG00000223429.1_4	chr1	52627858	52628698	-	841	0	0	0	1	0	0	0	0	0	0	0	0	RP4-800M22.2	ENSG00000223429.1_4	1	ENST00000412785.1_1	1
ENSG00000224255.2_3	chr1	52645520	52646225	+	706	0	0	0	0	1	0	0	0	9	0	0	0	RP4-800M22.3	ENSG00000224255.2_3	1	ENST00000429744.2_1	1
ENSG00000236004.2_4	chr1	52655588	52655981	-	394	0	0	0	0	0	0	0	0	0	0	0	0	RP4-800M22.4	ENSG00000236004.2_4	1	ENST00000454802.2_1	1
ENSG00000237663.2_3	chr1	52717734	52718445	-	344	0	0	0	0	0	0	0	0	0	0	0	0	RP4-814E15.1	ENSG00000237663.2_3	1	ENST00000428811.2_1	2
ENSG00000213735.2_3	chr1	52719293	52719848	+	556	0	0	1	0	7	6	2	0	7	3	6	4	RP4-814E15.2	ENSG00000213735.2_3	1	ENST00000395991.2_1	1
ENSG00000154222.14_3	chr1	52811395	52831865	-	7495	588	690	1049	813	566	502	350	360	579	563	572	541	CC2D1B	ENSG00000154222.14_3	11	ENST00000470844.5_1,ENST00000371586.6_2,ENST00000491136.6_1,ENST00000284376.7_2,ENST00000438021.5_3,ENST00000460261.5_1,ENST00000450942.2_3,ENST00000460370.1_1,ENST00000492426.1_1,ENST00000485966.1_1,ENST00000494789.1_1	4,24,24,25,19,20,19,4,2,6,3
ENSG00000272100.1_4	chr1	52819159	52819549	+	391	8	4	34	40	3	12	11	0	20	8	18	2	RP11-155O18.6	ENSG00000272100.1_4	1	ENST00000606527.1_1	1
ENSG00000224680.4_3	chr1	52834349	52834916	+	568	9	16	6	1	8	1	1	6	5	9	3	2	RP11-155O18.3	ENSG00000224680.4_3	1	ENST00000497678.2_1	1
ENSG00000085840.12_2	chr1	52838501	52870131	-	3157	1700	2059	2349	1962	1811	1232	1050	1293	2440	1791	2631	2463	ORC1	ENSG00000085840.12_2	2	ENST00000371568.7_1,ENST00000371566.1_1	17,17
ENSG00000134748.12_2	chr1	52870236	52886511	+	5658	773	745	1110	823	781	599	666	508	850	907	1009	811	PRPF38A	ENSG00000134748.12_2	3	ENST00000257181.9_1,ENST00000487160.1_1,ENST00000474048.1_1	10,3,8
ENSG00000134744.13_3	chr1	52873954	53019159	-	16199	2625	3142	3619	2739	2513	2351	1891	1941	3135	2728	2800	2983	ZCCHC11	ENSG00000134744.13_3	21	ENST00000528457.5_2,ENST00000527941.5_3,ENST00000257177.8_1,ENST00000371544.7_1,ENST00000466440.1_1,ENST00000494469.5_1,ENST00000471623.1_3,ENST00000531722.5_3,ENST00000474453.6_3,ENST00000470212.1_1,ENST00000469810.1_3,ENST00000528642.5_3,ENST00000497120.1_1,ENST00000484723.6_3,ENST00000481528.1_1,ENST00000371541.5_1,ENST00000481133.1_1,ENST00000473856.5_1,ENST00000355809.4_1,ENST00000470626.1_3…	3,5,30,30,2,4,3,9,8,3,3,23,6,21,2,16,2,11,3,5,3
ENSG00000239063.1	chr1	52877114	52877194	+	81	0	3	9	0	0	0	2	0	0	0	0	0	snoU13	ENSG00000239063.1	1	ENST00000458879.1	1
ENSG00000272371.1_4	chr1	53020490	53020945	+	456	38	75	28	21	10	28	11	15	22	24	40	21	RP11-25O10.2	ENSG00000272371.1_4	1	ENST00000607321.1_1	1
ENSG00000236290.1_3	chr1	53038786	53039488	+	703	0	0	0	0	0	0	0	0	2	0	0	0	RP11-25O10.1	ENSG00000236290.1_3	1	ENST00000422983.1_1	1
ENSG00000116157.5_2	chr1	53068044	53074723	+	1691	0	0	0	1	2	0	0	8	3	2	4	0	GPX7	ENSG00000116157.5_2	2	ENST00000361314.4_1,ENST00000459779.1_1	3,2
ENSG00000182183.14_2	chr1	53099016	53135355	+	2508	0	0	0	0	0	0	0	0	0	0	0	3	FAM159A	ENSG00000182183.14_2	4	ENST00000517870.1_1,ENST00000440303.5_1,ENST00000401050.7_1,ENST00000424164.1_1	3,5,6,3
ENSG00000162377.5_2	chr1	53150123	53164038	-	4165	98	147	198	148	162	165	109	91	335	205	381	235	COA7	ENSG00000162377.5_2	2	ENST00000371538.4_1,ENST00000486918.1_1	3,3
ENSG00000233664.1_3	chr1	53174794	53175114	+	321	0	0	0	0	0	0	0	1	0	0	3	0	RP11-159C21.3	ENSG00000233664.1_3	1	ENST00000450668.1_1	1
ENSG00000239640.2	chr1	53180071	53180365	+	295	0	0	0	0	0	0	0	0	0	0	0	0	RN7SL62P	ENSG00000239640.2	1	ENST00000498506.2	1
ENSG00000162378.12_2	chr1	53192139	53293014	+	8198	838	833	1092	954	744	605	477	534	1094	949	1171	853	ZYG11B	ENSG00000162378.12_2	2	ENST00000545132.5_1,ENST00000294353.6_1	14,14
ENSG00000252018.1	chr1	53219994	53220134	+	141	0	0	0	0	0	0	0	0	0	0	0	5	RNU2-30P	ENSG00000252018.1	1	ENST00000516209.1	1
ENSG00000228929.1_3	chr1	53237866	53238320	-	455	51	47	77	27	31	22	25	46	54	34	35	25	RP11-159C21.4	ENSG00000228929.1_3	1	ENST00000437890.1_1	1
ENSG00000206627.1	chr1	53270780	53270884	-	105	0	0	0	0	0	0	0	0	0	0	0	0	RNU6-969P	ENSG00000206627.1	1	ENST00000383900.1	1
ENSG00000203995.9_3	chr1	53308183	53360670	+	4694	506	534	741	550	374	360	339	283	445	411	555	520	ZYG11A	ENSG00000203995.9_3	3	ENST00000612017.4_2,ENST00000371532.5_2,ENST00000371528.1_2	14,13,14
ENSG00000242391.2_4	chr1	53346888	53347402	-	380	0	0	0	0	0	0	0	0	0	0	0	0	RP4-631H13.2	ENSG00000242391.2_4	1	ENST00000446786.2_1	2
ENSG00000121310.16_3	chr1	53361582	53392884	-	11572	30	6	15	37	5	10	19	20	8	34	31	21	ECHDC2	ENSG00000121310.16_3	26	ENST00000536120.5_1,ENST00000371522.8_1,ENST00000460612.5_1,ENST00000539680.1_1,ENST00000479183.6_1,ENST00000543419.5_1,ENST00000463923.5_1,ENST00000371520.5_1,ENST00000358358.9_1,ENST00000498544.5_1,ENST00000476477.6_1,ENST00000479593.5_1,ENST00000467988.2_1,ENST00000487866.5_1,ENST00000486170.2_1,ENST00000487851.5_1,ENST00000488268.5_1,ENST00000544365.5_1,ENST00000495920.5_1,ENST00000492992.1_1…	8,10,8,1,3,4,5,10,9,4,13,10,7,8,5,5,5,6,5,3,5,4,3,2,3,2
ENSG00000230953.2_4	chr1	53386094	53386268	+	175	0	0	0	0	0	0	0	0	2	1	0	0	RP4-631H13.6	ENSG00000230953.2_4	1	ENST00000420575.2_1	1
ENSG00000231866.2_4	chr1	53390921	53391095	-	175	0	0	0	0	0	0	0	0	0	0	0	0	RP4-631H13.4	ENSG00000231866.2_4	1	ENST00000436385.2_1	1
ENSG00000116171.17_4	chr1	53392901	53517375	+	8305	476	590	506	399	467	352	378	345	514	566	569	528	SCP2	ENSG00000116171.17_4	17	ENST00000371514.7_2,ENST00000478631.6_2,ENST00000528311.5_1,ENST00000371509.8_1,ENST00000407246.6_2,ENST00000371513.9_1,ENST00000528809.1_1,ENST00000640998.1_1,ENST00000529363.2_3,ENST00000473584.1_1,ENST00000430330.6_1,ENST00000408941.7_1,ENST00000478274.6_1,ENST00000484100.5_3,ENST00000533119.1_3,ENST00000435345.6_1,ENST00000488965.1_1	16,17,15,15,15,11,7,12,8,6,5,4,4,4,4,5,3
ENSG00000264834.1	chr1	53394346	53394444	+	99	0	0	0	0	0	0	0	0	0	0	0	0	MIR1273F	ENSG00000264834.1	1	ENST00000580581.1	1
ENSG00000266188.1	chr1	53400602	53400689	+	88	0	0	0	0	0	0	0	0	0	0	0	0	MIR5095	ENSG00000266188.1	1	ENST00000578844.1	1
ENSG00000265815.1	chr1	53405986	53406085	+	100	0	0	0	0	0	0	0	3	0	0	0	0	MIR1273G	ENSG00000265815.1	1	ENST00000577677.1	1
ENSG00000237279.2_4	chr1	53409208	53409602	-	395	0	0	0	0	0	0	0	0	0	0	0	0	RP4-631H13.5	ENSG00000237279.2_4	1	ENST00000427081.2_1	1
ENSG00000236360.2_4	chr1	53458873	53459374	-	502	0	0	1	1	1	1	0	0	0	0	4	3	RP11-334A14.2	ENSG00000236360.2_4	1	ENST00000414168.1_1	1
ENSG00000226147.1_3	chr1	53460398	53461698	+	1301	97	162	94	99	95	86	93	88	165	183	159	185	RP11-334A14.3	ENSG00000226147.1_3	1	ENST00000427668.1_1	1
ENSG00000174348.13_3	chr1	53527724	53551174	+	4900	0	0	1	0	0	0	0	0	0	7	0	0	PODN	ENSG00000174348.13_3	7	ENST00000395871.6_2,ENST00000371500.7_1,ENST00000618387.1_1,ENST00000312553.9_1,ENST00000471210.1_1,ENST00000471285.1_1,ENST00000490650.1_1	7,13,12,11,2,3,3
ENSG00000232993.1_5	chr1	53535610	53551174	-	467	0	0	0	0	0	0	0	0	0	0	0	0	RP11-334A14.5	ENSG00000232993.1_5	1	ENST00000447867.1_1	2
ENSG00000227644.2_3	chr1	53538782	53539061	-	280	0	0	0	0	0	0	0	0	0	0	0	0	RP11-334A14.6	ENSG00000227644.2_3	1	ENST00000438361.2_1	1
ENSG00000162383.11_4	chr1	53552851	53608304	-	5407	0	0	0	0	0	0	0	0	0	0	0	6	SLC1A7	ENSG00000162383.11_4	6	ENST00000620347.4_2,ENST00000611397.4_2,ENST00000371494.8_2,ENST00000488036.5_1,ENST00000620288.4_1,ENST00000371491.4_1	11,10,11,3,8,4
ENSG00000235563.1_4	chr1	53580248	53584281	+	1871	0	0	0	0	0	0	0	0	0	0	0	0	RP11-334A14.8	ENSG00000235563.1_4	1	ENST00000439621.1_1	2
ENSG00000277397.1_4	chr1	53646593	53652572	+	718	0	0	0	0	0	0	0	0	0	0	0	0	RP5-1024G6.9	ENSG00000277397.1_4	1	ENST00000617613.1_1	2
ENSG00000157184.6_3	chr1	53662101	53679869	+	10452	1853	2237	2509	2277	1740	1545	877	1189	1874	1578	2130	1887	CPT2	ENSG00000157184.6_3	12	ENST00000371486.3_1,ENST00000636867.1_2,ENST00000636239.1_1,ENST00000636891.1_1,ENST00000637252.1_1,ENST00000636935.1_1,ENST00000635862.1_1,ENST00000635888.1_1,ENST00000468572.2_2,ENST00000638135.1_1,ENST00000636673.1_1,ENST00000637726.1_1	5,5,4,5,6,4,6,6,3,3,1,1
ENSG00000236723.2_4	chr1	53675455	53679447	-	1227	4	1	6	19	4	1	8	3	25	25	8	12	RP5-1024G6.2	ENSG00000236723.2_4	2	ENST00000629810.1_2,ENST00000452466.1_1	3,2
ENSG00000162384.13_2	chr1	53679771	53686289	-	4487	935	1144	1039	848	809	808	589	654	1118	1013	851	1027	C1orf123	ENSG00000162384.13_2	7	ENST00000294360.4_1,ENST00000483739.5_1,ENST00000470385.5_1,ENST00000478839.1_1,ENST00000489755.1_1,ENST00000474227.1_1,ENST00000602807.1_1	8,6,7,3,3,2,1
ENSG00000259818.1_4	chr1	53686335	53689925	+	3591	17	30	7	11	13	29	16	9	19	35	2	12	RP5-1024G6.7	ENSG00000259818.1_4	1	ENST00000569869.1_1	1
ENSG00000162385.10_2	chr1	53692564	53704282	-	1463	120	75	118	92	100	84	56	59	56	86	103	85	MAGOH	ENSG00000162385.10_2	4	ENST00000371470.7_1,ENST00000371466.4_1,ENST00000495868.1_1,ENST00000462941.1_1	5,4,3,3
ENSG00000226754.1_4	chr1	53704282	53708455	+	1181	216	291	298	211	212	156	75	109	241	143	173	173	RP5-1024G6.5	ENSG00000226754.1_4	1	ENST00000458151.1_1	3
ENSG00000270172.1	chr1	53708036	53710212	-	2177	2	17	28	26	10	17	5	6	7	6	13	2	RP5-1024G6.8	ENSG00000270172.1	1	ENST00000602943.1	1
ENSG00000157193.15_3	chr1	53708036	53793742	-	10258	1127	1397	1076	806	1013	845	486	803	619	447	519	585	LRP8	ENSG00000157193.15_3	12	ENST00000306052.10_1,ENST00000529670.5_1,ENST00000371454.6_1,ENST00000465675.5_1,ENST00000354412.7_1,ENST00000480045.5_1,ENST00000347547.6_1,ENST00000459674.5_1,ENST00000460214.5_1,ENST00000481431.1_2,ENST00000475501.1_2,ENST00000496580.1_1	19,5,18,16,16,20,17,9,6,4,6,3
ENSG00000234578.1_4	chr1	53733607	53734273	+	470	0	0	0	3	0	0	0	0	0	0	3	0	RP4-784A16.1	ENSG00000234578.1_4	1	ENST00000432653.1_1	2
ENSG00000228838.1_4	chr1	53753696	53755378	+	675	0	0	0	0	0	0	0	0	0	0	0	0	RP4-784A16.2	ENSG00000228838.1_4	1	ENST00000421637.1_1	2
ENSG00000225030.1_5	chr1	53757463	53757810	-	237	0	2	0	3	1	1	5	14	0	14	5	0	RP4-784A16.3	ENSG00000225030.1_5	1	ENST00000450469.1_1	2
ENSG00000232762.1_4	chr1	53770208	53773134	+	752	0	0	0	0	0	0	0	0	0	0	0	0	RP4-784A16.4	ENSG00000232762.1_4	1	ENST00000446686.1_2	6
ENSG00000225675.2_3	chr1	53793905	53802181	+	567	0	21	2	0	0	1	0	4	0	8	7	8	RP4-784A16.5	ENSG00000225675.2_3	1	ENST00000445039.2_1	3
ENSG00000226938.1_4	chr1	53814160	53814905	-	383	0	0	0	0	0	0	0	0	0	0	0	0	RP11-117D22.1	ENSG00000226938.1_4	1	ENST00000429099.1_1	2
ENSG00000230138.1_4	chr1	53832340	53833917	-	850	0	0	0	0	0	0	0	0	0	0	0	0	RP11-117D22.2	ENSG00000230138.1_4	1	ENST00000449958.1_1	2
ENSG00000236253.7_3	chr1	53878821	53905693	-	3164	0	0	0	0	0	0	0	0	0	0	0	0	RP4-796B4.1	ENSG00000236253.7_3	6	ENST00000563752.5_1,ENST00000566461.1_1,ENST00000566100.1_1,ENST00000569142.1_1,ENST00000443844.3_1,ENST00000562700.1_1	3,3,1,2,1,2
ENSG00000143006.7_2	chr1	53925072	53933161	+	2440	0	0	0	0	0	0	0	0	0	0	0	0	DMRTB1	ENSG00000143006.7_2	2	ENST00000371445.3_1,ENST00000463126.1_1	4,3
ENSG00000174332.5_2	chr1	53971910	54203779	-	3113	131	220	269	184	148	120	56	75	80	47	64	57	GLIS1	ENSG00000174332.5_2	2	ENST00000312233.4_1,ENST00000628545.1_1	10,10
ENSG00000239007.1	chr1	54154422	54154485	-	64	0	0	0	0	0	0	0	0	2	0	1	5	RNU7-95P	ENSG00000239007.1	1	ENST00000459222.1	1
ENSG00000058804.11_2	chr1	54231133	54304533	-	5135	1566	1491	2220	1722	1336	1058	839	970	1581	1121	1728	1525	NDC1	ENSG00000058804.11_2	2	ENST00000371429.3_1,ENST00000480952.1_1	18,5
ENSG00000201003.1	chr1	54236691	54236826	-	136	0	0	0	0	0	0	0	0	0	0	0	0	SNORA58	ENSG00000201003.1	1	ENST00000364133.1	1
ENSG00000264454.1	chr1	54294465	54294534	+	70	0	0	0	0	0	0	0	0	0	0	0	0	AL049745.1	ENSG00000264454.1	1	ENST00000578163.1	1
ENSG00000229687.2_4	chr1	54307220	54307505	+	286	0	0	0	0	0	0	0	0	0	0	0	0	RP4-654H19.2	ENSG00000229687.2_4	1	ENST00000433953.2_1	1
ENSG00000058799.14_2	chr1	54317392	54355507	-	2072	465	435	380	343	388	410	175	243	407	180	429	384	YIPF1	ENSG00000058799.14_2	7	ENST00000464950.6_1,ENST00000371399.5_1,ENST00000072644.6_2,ENST00000469457.5_1,ENST00000480151.5_1,ENST00000465897.5_1,ENST00000472983.1_1	11,9,11,8,8,8,7
ENSG00000211452.10_4	chr1	54356912	54376759	+	2282	0	0	0	0	0	0	0	0	7	0	5	0	DIO1	ENSG00000211452.10_4	17	ENST00000534069.5_1,ENST00000529589.5_1,ENST00000361921.7_3,ENST00000322679.10_1,ENST00000613679.4_4,ENST00000617230.2_1,ENST00000530084.5_1,ENST00000528946.5_1,ENST00000525044.5_1,ENST00000527060.5_1,ENST00000610607.4_1,ENST00000526329.1_1,ENST00000532493.5_2,ENST00000525202.5_1,ENST00000529329.1_1,ENST00000524406.5_1,ENST00000388876.3_1	5,4,4,3,5,4,4,3,3,5,6,2,2,4,4,5,3
ENSG00000081870.11_2	chr1	54382247	54411602	-	3236	217	182	209	160	150	125	103	98	145	83	162	95	HSPB11	ENSG00000081870.11_2	6	ENST00000371378.6_1,ENST00000194214.9_1,ENST00000489675.1_1,ENST00000371377.3_1,ENST00000371376.1_1,ENST00000488884.1_1	6,6,3,5,2,2
ENSG00000116212.14_2	chr1	54411750	54433841	+	2411	477	430	524	407	355	329	242	263	557	307	553	383	LRRC42	ENSG00000116212.14_2	5	ENST00000371370.7_1,ENST00000371368.5_1,ENST00000319223.8_1,ENST00000444987.1_1,ENST00000477905.1_1	9,5,8,5,3
ENSG00000219102.3_3	chr1	54440642	54441704	-	1063	0	0	0	0	0	0	0	0	0	0	0	0	RP1-167A19.5	ENSG00000219102.3_3	1	ENST00000437410.2_1	1
ENSG00000203985.10_2	chr1	54472972	54483859	-	2375	0	0	0	0	0	0	0	0	0	0	0	1	LDLRAD1	ENSG00000203985.10_2	4	ENST00000545928.5_1,ENST00000420619.5_1,ENST00000371362.7_1,ENST00000371360.1_1	5,4,4,6
ENSG00000197015.2	chr1	54481327	54481616	+	288	0	0	0	0	0	0	0	0	0	0	0	0	AL353898.1	ENSG00000197015.2	1	ENST00000358975.2	2
ENSG00000116209.11_3	chr1	54492354	54519177	-	9149	783	807	1198	823	579	457	471	432	714	510	700	619	TMEM59	ENSG00000116209.11_3	9	ENST00000234831.9_2,ENST00000371348.5_2,ENST00000371344.5_2,ENST00000371341.5_2,ENST00000470395.1_1,ENST00000420738.5_1,ENST00000440019.5_1,ENST00000452421.5_2,ENST00000371337.3_2	8,7,5,8,2,8,6,8,3
ENSG00000272091.1	chr1	54492356	54494172	-	1817	18	72	109	98	37	40	38	39	103	61	67	92	RP4-758J24.5	ENSG00000272091.1	1	ENST00000606641.1	1
ENSG00000280378.1_1	chr1	54498799	54500553	-	1755	10	38	3	5	18	20	22	6	2	0	4	10	RP4-758J24.6	ENSG00000280378.1_1	1	ENST00000624679.1_1	1
ENSG00000203276.2	chr1	54498816	54500553	-	1737	10	38	3	5	18	20	22	6	2	0	3	10	AL353898.2	ENSG00000203276.2	1	ENST00000327057.5	2
ENSG00000116205.12_3	chr1	54519260	54578192	+	12165	1780	2095	2325	1924	1529	1399	1196	1088	1941	2174	1955	1992	TCEANC2	ENSG00000116205.12_3	4	ENST00000498272.1_1,ENST00000234827.5_2,ENST00000371331.1_1,ENST00000391366.3_1	5,5,4,1
ENSG00000264208.1	chr1	54519752	54519827	+	76	0	0	0	0	0	1	8	0	0	0	0	0	MIR4781	ENSG00000264208.1	1	ENST00000585250.1	1
ENSG00000225183.1_4	chr1	54555529	54555766	+	238	10	1	10	7	9	3	1	10	0	4	2	13	RP4-758J24.4	ENSG00000225183.1_4	1	ENST00000444055.1_1	1
ENSG00000237611.1	chr1	54565641	54565897	-	255	0	0	0	0	0	0	0	0	0	0	0	0	AL353898.3	ENSG00000237611.1	1	ENST00000422908.1	2
ENSG00000256407.2_5	chr1	54598359	54665746	-	3952	121	148	167	162	119	106	112	79	123	126	131	116	RP11-446E24.4	ENSG00000256407.2_5	3	ENST00000637610.1_1,ENST00000525949.1_1,ENST00000311841.7_2	10,3,8
ENSG00000157211.11_4	chr1	54598641	54619443	-	3229	5	0	17	5	6	1	4	1	9	0	3	0	CDCP2	ENSG00000157211.11_4	2	ENST00000530059.2_2,ENST00000371330.1_2	6,4
ENSG00000280425.2_5	chr1	54603419	54608653	+	4969	0	0	0	0	0	0	0	0	0	2	0	0	RP11-446E24.3	ENSG00000280425.2_5	1	ENST00000623663.2_2	2
ENSG00000215883.10_3	chr1	54635324	54665709	-	8926	897	1106	1292	1185	987	986	762	742	1264	1417	1253	1188	CYB5RL	ENSG00000215883.10_3	9	ENST00000287899.13_2,ENST00000420054.5_1,ENST00000421415.5_1,ENST00000490863.5_1,ENST00000528287.5_1,ENST00000534324.5_1,ENST00000493530.2_3,ENST00000462299.1_1,ENST00000497820.1_1	5,7,7,8,8,6,5,3,3
ENSG00000248835.2	chr1	54635333	54637997	-	2665	221	334	378	344	395	358	267	209	449	623	421	484	AL357673.1	ENSG00000248835.2	1	ENST00000536061.1	1
ENSG00000116221.15_2	chr1	54649714	54691137	+	2549	12095	12863	16413	12826	11635	10056	8753	8766	13973	11870	13313	12011	MRPL37	ENSG00000116221.15_2	6	ENST00000487096.5_1,ENST00000336230.10_1,ENST00000360840.9_1,ENST00000605337.5_2,ENST00000490670.1_1,ENST00000398219.2_1	4,5,7,7,5,4
ENSG00000157216.15_3	chr1	54691105	54879152	-	5227	793	1112	1481	951	889	832	829	766	1058	1430	1173	1248	SSBP3	ENSG00000157216.15_3	16	ENST00000326956.11_1,ENST00000610401.4_1,ENST00000528930.5_1,ENST00000417664.6_1,ENST00000371320.7_2,ENST00000371319.7_2,ENST00000533946.5_1,ENST00000357475.8_1,ENST00000426150.5_1,ENST00000444533.5_1,ENST00000420121.5_1,ENST00000530618.1_1,ENST00000533209.5_1,ENST00000525990.1_1,ENST00000528787.1_1,ENST00000448572.1_1	14,18,4,18,18,17,6,17,13,7,8,2,6,9,8,3
ENSG00000198711.5_4	chr1	54702113	54704736	+	2624	0	0	11	4	17	0	1	5	1	8	3	7	SSBP3-AS1	ENSG00000198711.5_4	1	ENST00000361350.5_1	1
ENSG00000225632.1_4	chr1	54751078	54753044	+	1111	0	0	0	0	0	0	0	0	0	0	0	0	RP5-997D24.3	ENSG00000225632.1_4	1	ENST00000426901.1_1	2
ENSG00000232245.1_4	chr1	54881929	54886533	+	289	0	0	0	0	0	0	0	0	0	0	0	0	RP4-705F19.1	ENSG00000232245.1_4	1	ENST00000447150.1_1	2
ENSG00000265404.1	chr1	54970341	54970443	+	103	0	0	0	0	0	0	0	0	0	0	0	0	AC099796.1	ENSG00000265404.1	1	ENST00000577877.1	1
ENSG00000235741.1_4	chr1	54982085	54982932	-	683	0	0	0	0	0	0	0	0	0	0	0	0	RP5-866L20.1	ENSG00000235741.1_4	1	ENST00000433377.1_1	2
ENSG00000237173.1_4	chr1	54990497	54990604	+	108	0	0	0	0	0	0	0	0	0	0	0	0	RP5-866L20.2	ENSG00000237173.1_4	1	ENST00000444140.1_1	1
ENSG00000252646.1	chr1	54991059	54991126	+	68	0	0	0	0	0	0	0	0	0	0	0	0	SNORD112	ENSG00000252646.1	1	ENST00000516837.1	1
ENSG00000227453.1_3	chr1	55002469	55003431	+	963	0	0	0	0	0	0	0	0	0	0	0	0	RP5-866L20.3	ENSG00000227453.1_3	1	ENST00000427917.1_1	1
ENSG00000162390.17_2	chr1	55007930	55104865	+	9768	45	141	134	115	71	89	80	61	85	127	71	94	ACOT11	ENSG00000162390.17_2	5	ENST00000481208.5_1,ENST00000498228.1_1,ENST00000343744.6_1,ENST00000371316.3_1,ENST00000479837.1_1	15,8,16,17,2
ENSG00000162391.11_4	chr1	55074855	55089229	-	2005	0	0	0	0	0	0	0	0	0	0	0	0	FAM151A	ENSG00000162391.11_4	2	ENST00000302250.6_2,ENST00000371304.2_2	8,7
ENSG00000230728.1_5	chr1	55087150	55094111	-	623	0	0	0	0	0	0	0	0	0	0	0	0	RP11-240D10.4	ENSG00000230728.1_5	1	ENST00000416119.1_1	2
ENSG00000184313.19_4	chr1	55107427	55175939	+	9088	34	14	15	42	4	4	1	3	8	0	8	5	MROH7	ENSG00000184313.19_4	13	ENST00000339553.9_2,ENST00000478097.1_1,ENST00000421030.6_2,ENST00000472987.5_1,ENST00000440047.5_1,ENST00000409996.5_2,ENST00000395690.6_2,ENST00000413188.5_1,ENST00000422659.5_1,ENST00000438846.5_1,ENST00000440217.5_1,ENST00000493533.1_1,ENST00000371287.3_1	19,6,24,4,23,22,19,21,23,18,20,3,7
ENSG00000271723.5_3	chr1	55107459	55207981	+	7090	324	306	289	260	274	182	165	182	436	419	521	342	MROH7-TTC4	ENSG00000271723.5_3	4	ENST00000606515.5_1,ENST00000425300.6_1,ENST00000414150.6_1,ENST00000460155.1_1	33,33,33,17
ENSG00000243725.6_3	chr1	55181495	55208330	+	3527	347	405	356	332	334	235	237	228	507	548	609	434	TTC4	ENSG00000243725.6_3	4	ENST00000371281.3_1,ENST00000486621.1_1,ENST00000371284.9_1,ENST00000486091.1_1	10,3,10,2
ENSG00000162396.5_2	chr1	55222571	55230187	-	2347	535	597	733	569	495	518	241	408	688	722	854	701	PARS2	ENSG00000162396.5_2	1	ENST00000371279.3_1	2
ENSG00000006555.10_3	chr1	55245385	55266940	-	6055	0	0	0	0	0	0	0	0	0	0	0	0	TTC22	ENSG00000006555.10_3	5	ENST00000371276.8_3,ENST00000488771.1_1,ENST00000371274.8_3,ENST00000448308.2_1,ENST00000474654.1_1	7,3,6,4,2
ENSG00000237453.1_4	chr1	55258558	55260578	+	343	0	0	0	0	0	0	0	0	0	0	0	0	RP11-67L3.2	ENSG00000237453.1_4	1	ENST00000450503.1_1	2
ENSG00000162398.11_2	chr1	55271736	55307925	+	1777	0	0	0	0	0	0	0	0	0	0	0	0	LEXM	ENSG00000162398.11_2	2	ENST00000358193.7_1,ENST00000371273.3_1	11,10
ENSG00000116133.11_2	chr1	55315306	55352891	-	4250	2938	3444	5477	4521	2756	2463	1640	1816	3032	2736	2855	2694	DHCR24	ENSG00000116133.11_2	3	ENST00000371269.7_1,ENST00000535035.5_1,ENST00000436604.1_1	9,10,4
ENSG00000242396.1_5	chr1	55352548	55353674	+	575	37	17	28	28	18	14	19	5	38	8	23	19	RP11-67L3.5	ENSG00000242396.1_5	1	ENST00000415336.1_1	2
ENSG00000233203.6_5	chr1	55353236	55354523	+	765	36	2	41	7	4	4	13	6	16	10	23	13	RP11-67L3.4	ENSG00000233203.6_5	4	ENST00000443284.1_1,ENST00000436033.1_1,ENST00000455380.5_1,ENST00000433690.1_1	2,2,3,2
ENSG00000284601.1_2	chr1	55440573	55446137	-	1733	0	0	0	0	0	0	0	0	0	0	0	0	RP11-12C17.3	ENSG00000284601.1_2	4	ENST00000641973.1_1,ENST00000641734.1_1,ENST00000641226.1_1,ENST00000641453.1_1	4,4,3,4
ENSG00000143001.4_2	chr1	55446465	55457966	+	1097	0	0	0	0	0	0	0	0	0	0	0	0	TMEM61	ENSG00000143001.4_2	1	ENST00000371268.3_1	3
ENSG00000233271.1_4	chr1	55446623	55457947	-	428	0	0	0	0	0	0	0	0	0	0	0	0	RP11-12C17.2	ENSG00000233271.1_4	1	ENST00000436960.1_1	2
ENSG00000162399.7_3	chr1	55463866	55477457	+	5113	0	0	0	2	0	0	0	0	0	0	0	12	BSND	ENSG00000162399.7_3	1	ENST00000371265.5_2	4
ENSG00000169174.10_2	chr1	55505221	55530525	+	4981	0	0	0	0	0	0	0	0	0	0	1	0	PCSK9	ENSG00000169174.10_2	2	ENST00000302118.5_1,ENST00000490692.1_1	12,8
ENSG00000162402.13_2	chr1	55532032	55680786	-	11772	6785	7853	10013	7692	6255	5400	5254	4596	7069	6244	7259	6387	USP24	ENSG00000162402.13_2	7	ENST00000294383.6_1,ENST00000484447.5_1,ENST00000480962.1_1,ENST00000472566.1_1,ENST00000512504.1_1,ENST00000482197.1_1,ENST00000634589.1_1	68,6,3,4,3,2,4
ENSG00000231090.2_5	chr1	55683318	55790364	+	2568	0	0	0	0	0	0	0	0	0	2	0	0	RP11-101C11.1	ENSG00000231090.2_5	2	ENST00000643232.1_1,ENST00000451250.1_1	2,2
ENSG00000231095.1_3	chr1	55688052	55689045	+	994	0	0	0	0	1	0	0	0	3	0	0	0	RP11-109I2.3	ENSG00000231095.1_3	1	ENST00000449769.1_1	1
ENSG00000265822.1	chr1	55691314	55691396	+	83	0	0	0	0	0	0	0	0	0	0	0	0	MIR4422	ENSG00000265822.1	1	ENST00000581938.1	1
ENSG00000234810.3_4	chr1	55794961	56536186	+	6257	0	0	0	4	0	0	0	0	0	0	0	0	RP11-90C4.1	ENSG00000234810.3_4	6	ENST00000643167.1_1,ENST00000646341.1_1,ENST00000422374.1_1,ENST00000634769.1_2,ENST00000424357.1_1,ENST00000646266.1_1	4,4,3,4,5,12
ENSG00000231900.3_3	chr1	55833139	55834447	+	1309	0	0	0	0	0	0	0	0	0	0	0	0	GOT2L1	ENSG00000231900.3_3	1	ENST00000440922.2_1	1
ENSG00000232198.2_3	chr1	55838383	55838989	-	607	0	0	0	0	0	0	0	0	0	0	0	0	RP4-633H17.2	ENSG00000232198.2_3	1	ENST00000421994.2_1	1
ENSG00000199831.1	chr1	55842199	55842525	-	327	0	0	0	0	0	0	0	0	0	0	0	0	RN7SKP291	ENSG00000199831.1	1	ENST00000362961.1	1
ENSG00000252162.1	chr1	55864187	55864293	+	107	0	0	0	0	0	0	0	0	0	0	0	0	RNU6-830P	ENSG00000252162.1	1	ENST00000516353.1	1
ENSG00000272051.1	chr1	55950544	55950645	-	102	0	0	0	0	0	0	0	0	0	0	0	0	Y_RNA	ENSG00000272051.1	1	ENST00000606692.1	1
ENSG00000230250.2_4	chr1	56381280	56410647	-	644	0	0	0	0	0	0	0	0	0	0	0	0	RP11-90C4.2	ENSG00000230250.2_4	2	ENST00000635532.1_1,ENST00000458145.1_1	2,3
ENSG00000227104.3_3	chr1	56404387	56404953	-	430	0	0	0	0	0	0	0	0	0	0	0	0	RP11-90C4.4	ENSG00000227104.3_3	1	ENST00000426300.3_1	2
ENSG00000233079.1_3	chr1	56410760	56415792	+	453	0	0	0	0	0	0	0	0	0	0	0	0	RP11-90C4.3	ENSG00000233079.1_3	1	ENST00000455010.1_1	2
ENSG00000235612.1_4	chr1	56611393	56620896	+	731	0	0	0	0	0	0	0	0	0	0	0	0	RP1-158P9.1	ENSG00000235612.1_4	1	ENST00000435828.1_1	3
ENSG00000260971.4_4	chr1	56620217	56943359	-	7878	14	6	9	26	6	1	3	2	4	3	6	8	RP1-158P9.2	ENSG00000260971.4_4	24	ENST00000641611.1_1,ENST00000641333.1_1,ENST00000641349.1_1,ENST00000641348.1_1,ENST00000641565.1_1,ENST00000641302.1_1,ENST00000641355.1_1,ENST00000641914.1_1,ENST00000642031.1_1,ENST00000641766.1_1,ENST00000641445.1_1,ENST00000641155.1_1,ENST00000641177.1_1,ENST00000641838.1_1,ENST00000569425.3_2,ENST00000642068.1_1,ENST00000641942.1_1,ENST00000642120.1_1,ENST00000641442.1_1,ENST00000641502.1_1…	8,5,4,8,2,5,3,1,6,2,3,3,4,3,3,3,3,3,2,3,3,2,2,2
ENSG00000284686.1_2	chr1	56639105	56990167	-	2655	154	315	237	180	246	165	144	126	323	229	391	234	RP1-158P9.3	ENSG00000284686.1_2	5	ENST00000641494.1_1,ENST00000641109.1_2,ENST00000642129.1_1,ENST00000641346.1_2,ENST00000641415.1_1	6,6,6,3,3
ENSG00000229871.1_3	chr1	56673239	56674128	-	890	0	0	0	0	0	0	0	0	0	0	0	0	RP4-710M16.1	ENSG00000229871.1_3	1	ENST00000441455.1_1	1
ENSG00000223307.2	chr1	56843005	56843090	-	86	0	0	0	0	0	0	0	0	0	0	0	0	AC119674.1	ENSG00000223307.2	1	ENST00000411375.2	1
ENSG00000223956.2_3	chr1	56880635	56881638	+	545	0	4	2	4	0	0	2	3	12	0	5	3	RP4-710M16.2	ENSG00000223956.2_3	2	ENST00000451914.1_1,ENST00000635434.1_1	4,2
ENSG00000162407.8_3	chr1	56960419	57110974	-	5286	383	547	369	293	400	301	282	232	505	429	688	441	PLPP3	ENSG00000162407.8_3	5	ENST00000371250.3_1,ENST00000472957.1_1,ENST00000459962.1_1,ENST00000461655.1_1,ENST00000476206.1_1	6,3,2,4,3
ENSG00000236776.1_3	chr1	57004124	57004583	+	460	0	0	0	0	0	0	0	0	0	0	0	0	RP11-213P13.1	ENSG00000236776.1_3	1	ENST00000446654.1_1	1
ENSG00000224980.1_3	chr1	57051285	57051915	-	433	2	10	2	0	0	0	0	0	0	0	0	0	RP11-377K22.3	ENSG00000224980.1_3	1	ENST00000421838.1_1	2
ENSG00000225475.1_4	chr1	57085082	57085222	-	141	1	4	0	4	1	3	0	0	1	3	0	1	RP11-377K22.2	ENSG00000225475.1_4	1	ENST00000442812.1_1	1
ENSG00000162409.10_2	chr1	57110995	57181008	+	9354	1042	972	1591	1027	997	869	753	670	1121	1328	1210	991	PRKAA2	ENSG00000162409.10_2	2	ENST00000371244.8_1,ENST00000610361.1_1	9,10
ENSG00000187889.12_4	chr1	57184477	57285369	-	4633	0	1	0	6	0	0	0	1	11	0	8	12	C1orf168	ENSG00000187889.12_4	5	ENST00000343433.6_1,ENST00000493000.5_1,ENST00000497991.1_1,ENST00000484327.1_1,ENST00000371240.3_1	20,14,3,14,2
ENSG00000229913.1_4	chr1	57289352	57292593	-	1824	0	0	0	0	0	0	0	0	0	0	0	0	RP11-378I13.1	ENSG00000229913.1_4	1	ENST00000425435.1_1	2
ENSG00000157131.10_2	chr1	57320479	57383894	+	2356	0	0	0	0	0	0	0	0	0	0	0	0	C8A	ENSG00000157131.10_2	1	ENST00000361249.3_1	11
ENSG00000021852.12_3	chr1	57394883	57431813	-	2729	0	0	0	0	0	0	0	0	0	0	0	0	C8B	ENSG00000021852.12_3	6	ENST00000371237.8_2,ENST00000535057.5_1,ENST00000543257.5_2,ENST00000465658.1_1,ENST00000468990.1_1,ENST00000494324.1_1	12,13,13,2,4,3
ENSG00000236341.1_5	chr1	57429559	57462430	+	610	0	0	0	0	0	0	0	0	0	0	3	0	RP5-1103B4.3	ENSG00000236341.1_5	1	ENST00000417420.1_1	4
ENSG00000221591.1	chr1	57431953	57432035	+	83	0	0	0	0	0	0	0	0	0	0	0	0	AL161740.1	ENSG00000221591.1	1	ENST00000408664.1	1
ENSG00000173406.15_4	chr1	57460451	59012406	-	7548	104	113	85	148	114	88	55	61	49	60	54	96	DAB1	ENSG00000173406.15_4	11	ENST00000371236.6_2,ENST00000414851.6_2,ENST00000485760.5_1,ENST00000420954.6_2,ENST00000371231.5_2,ENST00000371232.8_1,ENST00000332102.10_1,ENST00000371230.1_1,ENST00000489267.1_1,ENST00000473821.1_1,ENST00000477280.1_1	15,14,21,14,15,9,6,7,3,3,2
ENSG00000227935.1_4	chr1	57852248	57853122	+	708	0	0	0	0	0	0	0	0	0	0	0	0	RP6-102O10.1	ENSG00000227935.1_4	1	ENST00000422038.1_1	2
ENSG00000236888.1_3	chr1	58071519	58071878	-	360	0	0	0	0	0	0	0	0	0	0	0	0	RP11-243M12.1	ENSG00000236888.1_3	1	ENST00000434808.1_1	1
ENSG00000238773.1	chr1	58222756	58222848	+	93	0	0	0	0	0	0	0	0	0	0	0	0	AL137855.1	ENSG00000238773.1	1	ENST00000459042.1	1
ENSG00000226759.7_4	chr1	58326204	58346577	+	4336	0	0	0	0	0	0	0	0	0	0	0	0	RP4-737A23.2	ENSG00000226759.7_4	27	ENST00000585589.5_1,ENST00000416598.2_1,ENST00000592753.5_1,ENST00000585576.5_1,ENST00000608806.1_2,ENST00000610197.1_2,ENST00000420811.2_1,ENST00000432897.5_1,ENST00000434141.1_1,ENST00000610175.1_2,ENST00000608833.1_2,ENST00000591882.1_1,ENST00000587466.5_1,ENST00000588227.5_1,ENST00000592898.5_1,ENST00000590080.5_1,ENST00000588058.5_1,ENST00000592838.5_1,ENST00000591523.5_1,ENST00000591173.5_1…	2,2,2,2,2,2,2,4,2,2,2,3,2,3,2,3,2,6,4,5,4,3,3,4,6,3,3
ENSG00000229887.4_2	chr1	58513561	58515007	-	1447	0	4	0	0	0	0	0	0	4	0	0	0	HNRNPA1P6	ENSG00000229887.4_2	2	ENST00000631770.1_1,ENST00000394002.4_1	1,1
ENSG00000223416.3_3	chr1	58521805	58522152	-	348	6	5	3	4	3	1	1	2	5	10	3	2	RP11-393I23.2	ENSG00000223416.3_3	1	ENST00000488067.1_1	1
ENSG00000235038.1_4	chr1	58525811	58545946	+	620	0	0	0	0	0	0	0	0	0	0	0	0	RP11-393I23.4	ENSG00000235038.1_4	1	ENST00000419596.1_1	5
ENSG00000230546.1_4	chr1	58550091	58550231	+	141	0	0	0	0	0	0	0	0	0	0	0	0	RP11-393I23.3	ENSG00000230546.1_4	1	ENST00000441183.1_1	1
ENSG00000233216.1_4	chr1	58694354	58694675	-	322	1	3	3	0	0	7	1	7	10	0	4	0	RP11-414C16.1	ENSG00000233216.1_4	1	ENST00000394974.2_1	1
ENSG00000162600.11_3	chr1	58881056	59012474	-	3718	121	147	184	181	133	145	100	98	155	138	142	109	OMA1	ENSG00000162600.11_3	11	ENST00000467509.5_1,ENST00000460671.1_1,ENST00000421528.6_1,ENST00000371226.7_1,ENST00000476933.1_1,ENST00000456980.5_1,ENST00000467063.1_1,ENST00000419242.5_1,ENST00000426139.5_1,ENST00000453710.1_1,ENST00000482274.2_1	4,2,9,9,3,5,4,4,4,5,2
ENSG00000270209.1_4	chr1	59018585	59019005	-	421	0	0	0	0	0	0	0	0	0	0	0	0	RP4-592A1.4	ENSG00000270209.1_4	1	ENST00000604022.1_1	1
ENSG00000264128.1	chr1	59031301	59031604	-	304	0	0	0	0	0	0	0	0	0	0	0	0	RN7SL713P	ENSG00000264128.1	1	ENST00000582127.1	1
ENSG00000184292.6_2	chr1	59041095	59043445	-	2351	0	0	0	1	1	0	0	0	0	1	1	0	TACSTD2	ENSG00000184292.6_2	1	ENST00000371225.3_1	1
ENSG00000185839.3_4	chr1	59096513	59097202	-	690	18	13	22	12	10	7	13	29	18	25	18	5	RP4-592A1.2	ENSG00000185839.3_4	1	ENST00000427762.1_1	1
ENSG00000162601.9_2	chr1	59120411	59165764	-	8938	3055	3151	4323	3250	2484	2296	2136	1849	3321	2930	3237	3037	MYSM1	ENSG00000162601.9_2	8	ENST00000472487.5_1,ENST00000493821.5_1,ENST00000622766.1_1,ENST00000401044.7_1,ENST00000481973.1_1,ENST00000466774.5_1,ENST00000483003.5_1,ENST00000489282.1_1	20,16,7,17,2,6,5,3
ENSG00000283445.1_4	chr1	59181281	59236967	+	4739	0	0	0	0	0	2	0	0	0	0	0	0	RP11-63G10.4	ENSG00000283445.1_4	2	ENST00000637377.1_1,ENST00000636386.1_1	7,4
ENSG00000222168.1	chr1	59187951	59188044	+	94	0	0	0	0	0	0	0	0	0	0	0	0	Y_RNA	ENSG00000222168.1	1	ENST00000410236.1	1
ENSG00000264081.1	chr1	59230521	59230607	-	87	0	0	0	0	0	0	0	0	0	0	0	0	AL136985.1	ENSG00000264081.1	1	ENST00000582637.1	1
ENSG00000177606.6_2	chr1	59246460	59249999	-	3540	14358	16366	19925	17688	12042	10224	10801	9673	11446	9742	9669	9295	JUN	ENSG00000177606.6_2	1	ENST00000371222.3_1	1
ENSG00000234807.5_3	chr1	59250832	59365266	+	996	16	4	0	7	0	3	12	1	7	1	1	2	RP4-794H19.2	ENSG00000234807.5_3	1	ENST00000419531.2_1	4
ENSG00000272226.1_4	chr1	59278480	59279014	-	535	0	0	5	3	0	0	2	2	1	2	9	8	RP11-63G10.3	ENSG00000272226.1_4	1	ENST00000607372.1_1	1
ENSG00000231740.1_4	chr1	59304120	59316926	-	395	0	0	0	0	0	0	0	0	0	0	0	0	RP11-63G10.2	ENSG00000231740.1_4	1	ENST00000424592.1_2	3
ENSG00000232453.6_4	chr1	59348540	59369419	-	1746	3	0	7	26	1	4	0	9	1	15	1	9	RP4-794H19.1	ENSG00000232453.6_4	5	ENST00000423408.5_1,ENST00000634986.1_1,ENST00000635492.1_1,ENST00000634763.1_1,ENST00000427292.1_1	4,3,5,4,2
ENSG00000237352.3_3	chr1	59399315	59706227	+	6730	0	3	0	0	0	0	0	0	0	0	0	0	RP4-794H19.4	ENSG00000237352.3_3	11	ENST00000634502.1_1,ENST00000634569.1_1,ENST00000447329.5_1,ENST00000438195.5_1,ENST00000424308.1_1,ENST00000635515.1_1,ENST00000635072.1_1,ENST00000449812.2_1,ENST00000635571.1_1,ENST00000631169.2_2,ENST00000625548.1_2	14,6,3,4,3,5,5,4,6,2,5
ENSG00000228121.1_3	chr1	59465348	59466166	+	819	0	0	0	0	0	0	0	0	0	0	0	0	RP4-794H19.3	ENSG00000228121.1_3	1	ENST00000412562.1_1	1
ENSG00000241042.1_5	chr1	59520069	59521721	-	171	0	0	0	0	0	0	0	0	0	0	0	0	RP11-145M4.1	ENSG00000241042.1_5	1	ENST00000422198.1_1	2
ENSG00000235215.2_5	chr1	59521671	59543788	-	317	0	0	0	0	0	0	0	0	0	0	0	0	RP11-145M4.2	ENSG00000235215.2_5	1	ENST00000451090.1_1	3
ENSG00000224609.6_3	chr1	59597608	59673793	-	2641	0	0	0	10	0	0	0	0	0	0	0	0	RP11-470E16.1	ENSG00000224609.6_3	10	ENST00000425914.6_1,ENST00000585367.5_1,ENST00000592607.4_1,ENST00000624582.3_2,ENST00000625069.3_2,ENST00000623433.3_2,ENST00000624265.3_2,ENST00000587839.2_1,ENST00000631064.2_2,ENST00000436225.1_1	3,3,3,3,5,4,3,2,3,3
ENSG00000270457.1_4	chr1	59754975	59755312	-	338	0	1	3	0	0	0	0	0	0	0	0	9	RP11-467C18.1	ENSG00000270457.1_4	1	ENST00000604999.1_1	1
ENSG00000172456.17_2	chr1	59762310	60276319	+	12174	129	200	100	122	56	110	72	84	116	58	110	56	FGGY	ENSG00000172456.17_2	25	ENST00000582567.1_1,ENST00000413489.5_1,ENST00000634606.1_1,ENST00000474476.5_1,ENST00000462744.5_1,ENST00000371218.8_1,ENST00000495718.5_1,ENST00000583635.1_1,ENST00000303721.11_1,ENST00000430447.5_1,ENST00000634364.1_1,ENST00000635297.1_1,ENST00000634399.1_1,ENST00000635156.1_1,ENST00000424725.2_1,ENST00000371212.5_1,ENST00000475949.5_1,ENST00000485720.1_1,ENST00000371210.1_1,ENST00000493891.5_…	3,5,17,9,5,17,9,3,16,17,20,14,20,17,13,14,6,5,10,6,5,3,4,4,3
ENSG00000266150.1	chr1	60198899	60198968	-	70	0	0	0	0	0	0	0	0	0	0	0	0	MIR4711	ENSG00000266150.1	1	ENST00000578274.1	1
ENSG00000226883.1_4	chr1	60220419	60254854	-	767	0	0	0	0	0	0	0	0	0	0	0	0	RP4-782L23.2	ENSG00000226883.1_4	1	ENST00000443012.1_1	2
ENSG00000134709.10_2	chr1	60280458	60342050	+	6758	231	133	242	193	201	160	126	115	159	192	145	197	HOOK1	ENSG00000134709.10_2	6	ENST00000455990.5_1,ENST00000371208.3_1,ENST00000465876.5_1,ENST00000474695.1_1,ENST00000466803.1_1,ENST00000491135.1_1	7,22,20,3,5,2
ENSG00000134716.9_2	chr1	60358980	60392462	-	2990	145	199	272	326	108	163	85	123	179	77	169	143	CYP2J2	ENSG00000134716.9_2	5	ENST00000371204.3_1,ENST00000492633.5_1,ENST00000466095.5_1,ENST00000469406.5_1,ENST00000468257.1_1	9,8,8,10,5
ENSG00000265535.1	chr1	60440431	60440726	-	296	0	0	0	0	0	0	0	0	0	0	0	0	RN7SL475P	ENSG00000265535.1	1	ENST00000583379.1	1
ENSG00000162598.13_3	chr1	60452941	60539442	-	4422	0	0	0	0	0	0	0	0	0	0	0	0	C1orf87	ENSG00000162598.13_3	5	ENST00000486478.5_1,ENST00000450089.6_2,ENST00000371201.3_2,ENST00000488027.5_1,ENST00000491817.2_1	6,8,12,4,5
ENSG00000229332.2_3	chr1	60563087	60563648	+	562	0	0	0	0	0	0	0	0	0	0	0	0	RP11-575B7.2	ENSG00000229332.2_3	1	ENST00000412993.2_1	1
ENSG00000238242.1_4	chr1	60580547	60615351	+	683	0	0	0	0	0	0	0	0	0	0	0	0	RP11-575B7.3	ENSG00000238242.1_4	1	ENST00000456878.1_1	3
ENSG00000226476.3_3	chr1	60981388	61106163	-	10622	5	1	14	0	2	7	6	5	0	3	0	0	RP11-776H12.1	ENSG00000226476.3_3	5	ENST00000634836.1_1,ENST00000635048.1_1,ENST00000635616.1_1,ENST00000439156.2_1,ENST00000634281.1_1	8,7,8,8,6
ENSG00000231252.2_4	chr1	61125303	61333670	-	4285	0	0	7	0	0	3	0	0	0	0	0	0	RP11-436K8.1	ENSG00000231252.2_4	3	ENST00000423403.1_1,ENST00000635290.1_1,ENST00000634701.1_1	6,9,10
ENSG00000162599.15_4	chr1	61330931	61928465	+	10872	1942	2389	2779	2180	1659	1629	1243	1214	1189	901	1370	1546	NFIA	ENSG00000162599.15_4	14	ENST00000371191.5_1,ENST00000476646.5_3,ENST00000407417.7_2,ENST00000479364.1_1,ENST00000371189.8_1,ENST00000403491.7_2,ENST00000371187.7_2,ENST00000485903.6_1,ENST00000371185.6_1,ENST00000371184.6_1,ENST00000496712.1_3,ENST00000482020.1_3,ENST00000357977.5_2,ENST00000493627.1_3	11,4,11,8,12,11,10,10,10,7,2,5,4,3
ENSG00000237928.5_4	chr1	61405911	61436448	-	1843	0	0	0	0	0	0	0	0	0	0	0	0	RP4-668G5.1	ENSG00000237928.5_4	3	ENST00000438559.5_1,ENST00000418662.1_1,ENST00000421455.1_1	7,3,4
ENSG00000263380.1	chr1	61549127	61549202	-	76	0	0	0	0	0	0	0	0	0	0	0	0	AC096534.1	ENSG00000263380.1	1	ENST00000584315.1	1
ENSG00000270742.1_5	chr1	61590405	61590874	+	470	36	20	45	41	24	12	15	23	35	85	53	30	RP4-802A10.1	ENSG00000270742.1_5	1	ENST00000603233.1_1	1
ENSG00000237853.6_3	chr1	61714617	61719182	-	842	0	0	0	0	0	0	0	0	0	1	0	0	RP5-833A20.1	ENSG00000237853.6_3	7	ENST00000442027.5_1,ENST00000617929.4_2,ENST00000626805.2_2,ENST00000596354.5_1,ENST00000596404.1_1,ENST00000630199.2_1,ENST00000630993.1_2	4,2,4,3,4,3,2
ENSG00000284808.1_1	chr1	61946759	61998943	+	2442	0	0	0	0	0	0	0	0	0	0	0	0	RP11-430G17.4	ENSG00000284808.1_1	1	ENST00000647399.1_1	3
ENSG00000264551.1	chr1	62094703	62094793	+	91	0	0	0	0	0	0	0	0	0	0	0	0	AC099791.1	ENSG00000264551.1	1	ENST00000580743.1	1
ENSG00000223920.2_4	chr1	62119866	62120580	+	715	0	0	0	0	0	0	0	0	0	0	0	0	RP11-430G17.1	ENSG00000223920.2_4	1	ENST00000416440.2_1	1
ENSG00000162604.12_4	chr1	62146718	62191095	-	5516	263	245	282	193	168	151	151	125	215	218	234	133	TM2D1	ENSG00000162604.12_4	12	ENST00000606498.5_3,ENST00000294613.9_3,ENST00000472357.1_1,ENST00000371180.6_3,ENST00000488206.5_1,ENST00000472989.5_1,ENST00000488410.5_1,ENST00000468586.5_1,ENST00000371178.5_1,ENST00000494926.5_3,ENST00000496465.1_2,ENST00000371177.2_2	7,7,2,7,8,4,4,7,5,5,5,5
ENSG00000271200.1_4	chr1	62207670	62208096	-	427	2	4	0	8	0	0	0	1	8	0	0	4	RP11-430G17.3	ENSG00000271200.1_4	1	ENST00000605725.1_1	1
ENSG00000132849.20_4	chr1	62208078	62644347	+	11990	531	564	719	515	454	312	317	248	403	561	417	460	PATJ	ENSG00000132849.20_4	18	ENST00000642238.1_1,ENST00000316485.11_1,ENST00000635214.1_1,ENST00000459752.5_1,ENST00000484562.5_1,ENST00000371158.6_2,ENST00000613764.4_1,ENST00000635023.1_1,ENST00000484937.5_1,ENST00000488913.1_1,ENST00000493967.1_1,ENST00000494842.2_1,ENST00000490547.2_3,ENST00000646453.1_1,ENST00000635137.1_2,ENST00000307297.8_1,ENST00000465798.2_3,ENST00000472512.2_1	44,26,36,34,35,43,29,36,33,2,2,5,3,18,17,12,3,3
ENSG00000200575.1	chr1	62282091	62282194	+	104	0	14	3	0	0	0	1	2	3	2	1	0	RNU6-414P	ENSG00000200575.1	1	ENST00000363705.1	1
ENSG00000212360.1	chr1	62318171	62318274	+	104	0	0	0	0	0	0	0	0	1	0	0	0	RNU6-1177P	ENSG00000212360.1	1	ENST00000391058.1	1
ENSG00000236646.1_3	chr1	62504514	62504783	+	270	12	8	6	2	0	8	20	0	0	0	0	0	HBXIPL	ENSG00000236646.1_3	1	ENST00000444290.1_1	1
ENSG00000242860.2	chr1	62538120	62538411	+	292	0	7	0	0	0	0	0	0	0	0	0	1	RN7SL180P	ENSG00000242860.2	1	ENST00000466769.2	1
ENSG00000263908.1	chr1	62544458	62544531	+	74	0	0	0	0	0	0	0	0	0	0	0	0	MIR3116-1	ENSG00000263908.1	1	ENST00000584654.1	1
ENSG00000234204.1_3	chr1	62654803	62655625	+	458	0	0	0	0	0	0	0	0	0	0	0	0	RP5-1155K23.2	ENSG00000234204.1_3	1	ENST00000411569.1_1	2
ENSG00000234088.1_3	chr1	62656194	62656598	+	405	0	0	0	0	0	0	0	0	0	0	0	0	RP5-1155K23.1	ENSG00000234088.1_3	1	ENST00000439294.1_1	1
ENSG00000240563.1_2	chr1	62660503	62678000	+	3849	0	0	0	0	0	0	0	0	0	0	0	0	L1TD1	ENSG00000240563.1_2	1	ENST00000498273.1_1	4
ENSG00000237227.1_4	chr1	62673808	62674114	-	307	0	0	0	0	0	0	0	0	0	0	0	0	RP5-1155K23.4	ENSG00000237227.1_4	1	ENST00000450606.1_1	1
ENSG00000200174.1	chr1	62677229	62677338	+	110	0	0	0	0	0	0	0	0	0	0	0	0	Y_RNA	ENSG00000200174.1	1	ENST00000363304.1	1
ENSG00000132854.18_2	chr1	62702651	62785085	-	5980	0	4	1	6	1	0	3	5	2	9	11	0	KANK4	ENSG00000132854.18_2	4	ENST00000317477.8_1,ENST00000371153.8_1,ENST00000371150.5_1,ENST00000354381.3_2	4,10,7,9
ENSG00000201153.1	chr1	62763821	62763928	-	108	0	0	0	0	0	0	0	0	0	0	0	0	RNU6-371P	ENSG00000201153.1	1	ENST00000364283.1	1
ENSG00000162607.12_2	chr1	62901968	62917475	+	4263	164	126	207	155	201	138	101	137	280	164	230	140	USP1	ENSG00000162607.12_2	4	ENST00000452143.5_1,ENST00000442679.5_1,ENST00000371146.5_1,ENST00000339950.4_1	5,3,9,9
ENSG00000116641.17_3	chr1	62919969	63154039	-	24872	1784	2287	2513	1939	1757	1637	1604	1363	1993	2291	2055	2143	DOCK7	ENSG00000116641.17_3	37	ENST00000634495.2_2,ENST00000251157.10_2,ENST00000454575.6_1,ENST00000635348.1_1,ENST00000635983.1_1,ENST00000340370.10_1,ENST00000637255.1_1,ENST00000634264.1_2,ENST00000635123.1_2,ENST00000635253.1_1,ENST00000637306.1_1,ENST00000489185.1_1,ENST00000467758.1_1,ENST00000637487.1_1,ENST00000635088.1_2,ENST00000637839.1_1,ENST00000638042.1_1,ENST00000636370.1_1,ENST00000636746.1_1,ENST00000637735.1…	8,50,49,2,16,49,29,49,48,50,2,5,2,2,5,2,2,2,2,2,43,2,2,6,6,6,2,2,6,16,14,2,3,11,1,2,2
ENSG00000270549.1_4	chr1	62996307	62996544	+	238	0	0	0	0	0	0	0	0	0	0	0	0	RP11-293K19.1	ENSG00000270549.1_4	1	ENST00000604867.1_1	1
ENSG00000132855.4_2	chr1	63063158	63071830	+	3250	0	0	0	0	0	0	0	0	0	0	0	0	ANGPTL3	ENSG00000132855.4_2	3	ENST00000371129.3_1,ENST00000482591.1_1,ENST00000493994.1_1	7,3,2
ENSG00000269624.1	chr1	63073437	63075249	+	1813	0	0	0	0	0	0	0	0	0	1	0	0	AL138847.1	ENSG00000269624.1	1	ENST00000593719.1	1
ENSG00000278967.1_4	chr1	63073437	63075255	+	1819	0	0	0	0	0	0	0	0	0	1	0	0	RP5-849H19.3	ENSG00000278967.1_4	1	ENST00000624477.1_1	1
ENSG00000213703.2_4	chr1	63106793	63107338	-	546	5	14	21	15	3	12	7	14	7	31	10	21	RP5-849H19.2	ENSG00000213703.2_4	1	ENST00000258651.4_1	1
ENSG00000235545.1_4	chr1	63154153	63176365	+	1228	18	23	24	22	10	30	16	15	1	6	11	25	RP11-230B22.1	ENSG00000235545.1_4	1	ENST00000453229.1_1	2
ENSG00000125703.14_2	chr1	63249806	63331184	+	3110	210	215	305	227	153	208	257	149	236	277	293	146	ATG4C	ENSG00000125703.14_2	5	ENST00000443289.5_1,ENST00000317868.8_1,ENST00000371120.7_1,ENST00000371118.1_1,ENST00000414558.2_1	5,11,11,5,5
ENSG00000234318.1_4	chr1	63361680	63367310	+	447	0	2	3	13	0	0	5	6	0	0	0	0	RP4-771M4.3	ENSG00000234318.1_4	1	ENST00000450811.1_1	2
ENSG00000237163.1_4	chr1	63370851	63371153	+	303	0	0	0	3	0	0	0	0	0	0	0	0	RP4-771M4.2	ENSG00000237163.1_4	1	ENST00000435230.1_1	1
ENSG00000229537.6_4	chr1	63441422	63488175	-	2005	0	0	0	0	0	0	0	0	0	0	0	0	RP11-5P4.1	ENSG00000229537.6_4	5	ENST00000641890.1_1,ENST00000420285.5_1,ENST00000425352.5_2,ENST00000420659.1_2,ENST00000641712.1_1	2,2,2,2,4
ENSG00000227485.1_4	chr1	63489878	63491329	+	359	0	0	0	0	0	0	0	0	0	0	0	0	RP11-5P4.2	ENSG00000227485.1_4	1	ENST00000418091.1_1	2
ENSG00000229225.1_4	chr1	63543752	63544702	-	157	0	0	0	0	0	0	0	0	0	0	0	0	RP11-5P4.3	ENSG00000229225.1_4	1	ENST00000427547.1_1	2
ENSG00000203605.3_4	chr1	63604921	63628824	+	823	0	0	0	0	0	0	0	0	0	0	0	0	RP11-335E6.2	ENSG00000203605.3_4	1	ENST00000455038.1_1	3
ENSG00000224209.7_3	chr1	63624758	63782945	-	4490	1	0	29	16	2	3	2	0	15	0	4	1	LINC00466	ENSG00000224209.7_3	10	ENST00000432537.2_1,ENST00000635458.1_1,ENST00000447183.3_1,ENST00000634725.1_3,ENST00000635555.1_1,ENST00000634576.1_1,ENST00000635218.1_1,ENST00000455304.6_1,ENST00000418086.1_1,ENST00000436475.2_1	2,11,7,11,6,10,8,5,2,7
ENSG00000252259.1	chr1	63652007	63652121	-	115	0	0	0	0	0	0	0	0	0	0	0	0	RNA5SP49	ENSG00000252259.1	1	ENST00000516450.1	1
ENSG00000228734.2_4	chr1	63715591	63717442	+	859	0	0	0	0	0	0	0	0	0	0	0	0	RP11-335E6.3	ENSG00000228734.2_4	1	ENST00000449140.2_1	2
ENSG00000223683.1_3	chr1	63727784	63728378	+	595	0	0	0	0	0	0	0	0	0	0	0	0	AL138935.1	ENSG00000223683.1_3	1	ENST00000429660.1_1	1
ENSG00000230798.5_4	chr1	63786555	63790112	-	1208	61	132	104	77	64	100	49	39	72	69	58	112	RP4-792G4.2	ENSG00000230798.5_4	5	ENST00000426393.5_1,ENST00000418244.5_1,ENST00000449386.5_1,ENST00000431294.5_1,ENST00000427268.1_1	2,4,3,3,3
ENSG00000187140.5_2	chr1	63788712	63790797	+	2086	50	105	49	116	71	82	34	62	77	119	83	109	FOXD3	ENSG00000187140.5_2	1	ENST00000371116.3_1	1
ENSG00000252784.1	chr1	63803934	63804043	+	110	0	0	0	0	0	0	0	0	0	0	0	0	Y_RNA	ENSG00000252784.1	1	ENST00000516975.1	1
ENSG00000236674.1_4	chr1	63825494	63826850	-	1357	0	0	0	0	0	0	0	0	2	0	0	0	RP4-792G4.3	ENSG00000236674.1_4	1	ENST00000455736.1_1	1
ENSG00000088035.15_2	chr1	63833261	63904233	+	4950	212	157	227	182	199	155	111	105	231	273	264	175	ALG6	ENSG00000088035.15_2	7	ENST00000371108.8_1,ENST00000487136.2_1,ENST00000603108.5_1,ENST00000263440.4_1,ENST00000465969.5_1,ENST00000462390.1_1,ENST00000494765.1_1	15,4,13,14,5,4,2
ENSG00000142856.16_2	chr1	63906441	64059392	-	5459	986	1010	1274	943	833	790	558	542	849	642	957	888	ITGB3BP	ENSG00000142856.16_2	14	ENST00000492655.1_1,ENST00000371092.7_1,ENST00000271002.14_1,ENST00000489099.5_1,ENST00000461681.5_1,ENST00000463803.5_1,ENST00000478538.1_1,ENST00000476508.5_1,ENST00000460394.5_1,ENST00000462285.5_1,ENST00000489863.5_1,ENST00000465781.5_1,ENST00000460251.5_1,ENST00000478138.1_1	2,10,9,10,5,5,2,6,8,5,7,3,5,5
ENSG00000203965.12_3	chr1	63989043	64038364	+	5704	167	222	134	142	179	121	93	122	192	105	128	127	EFCAB7	ENSG00000203965.12_3	6	ENST00000480886.1_1,ENST00000371088.4_1,ENST00000493605.1_1,ENST00000496956.1_1,ENST00000460678.6_1,ENST00000461039.1_1	4,14,2,3,7,5
ENSG00000264271.1	chr1	63995288	63995569	-	282	0	0	0	0	0	0	0	0	0	0	0	0	RN7SL488P	ENSG00000264271.1	1	ENST00000585186.1	1
ENSG00000251720.1	chr1	64002382	64002441	-	60	0	0	0	0	0	0	0	0	0	0	0	0	RNU7-123P	ENSG00000251720.1	1	ENST00000515911.1	1
ENSG00000116652.6_3	chr1	64012753	64016307	+	3555	23	35	41	51	14	33	39	31	61	41	30	54	DLEU2L	ENSG00000116652.6_3	1	ENST00000371086.3_1	1
ENSG00000079739.15_3	chr1	64058947	64125916	+	4090	1064	1128	1297	1089	1077	805	577	746	665	456	695	672	PGM1	ENSG00000079739.15_3	5	ENST00000371084.7_2,ENST00000540265.5_1,ENST00000473117.2_1,ENST00000371083.4_2,ENST00000483707.1_1	11,11,2,11,2
ENSG00000244256.2	chr1	64121414	64121716	+	303	2	3	1	6	0	0	0	0	6	0	0	0	RN7SL130P	ENSG00000244256.2	1	ENST00000489463.2	1
ENSG00000185483.11_3	chr1	64239693	64647181	+	6715	902	1150	1376	1195	835	792	475	627	447	346	473	425	ROR1	ENSG00000185483.11_3	4	ENST00000371080.5_1,ENST00000371079.5_2,ENST00000482426.1_1,ENST00000545203.2_2	7,9,6,8
ENSG00000177452.7_4	chr1	64254392	64254975	-	584	0	0	0	0	0	0	0	0	0	0	0	0	RP4-597J3.1	ENSG00000177452.7_4	1	ENST00000418154.1_1	1
ENSG00000228056.3_3	chr1	64308867	64309356	-	490	0	0	0	0	0	0	0	0	0	0	0	0	CFLP3	ENSG00000228056.3_3	1	ENST00000440942.1_1	1
ENSG00000207190.1	chr1	64494566	64494672	-	107	0	0	0	0	0	0	0	0	0	0	0	0	RNU6-809P	ENSG00000207190.1	1	ENST00000384461.1	1
ENSG00000200508.1	chr1	64532312	64532413	-	102	0	0	0	0	0	0	0	0	0	0	0	0	Y_RNA	ENSG00000200508.1	1	ENST00000363638.1	1
ENSG00000223949.6_4	chr1	64560125	64636980	-	3544	0	0	7	4	0	0	0	0	0	0	0	6	RP11-24J23.2	ENSG00000223949.6_4	2	ENST00000412349.6_1,ENST00000424995.1_1	6,5
ENSG00000284928.1_1	chr1	64652474	64658368	+	1031	0	0	0	0	0	0	0	0	0	0	0	0	RP11-24J23.3	ENSG00000284928.1_1	1	ENST00000646967.1_1	2
ENSG00000177414.13_4	chr1	64669310	64733051	+	1838	0	0	0	1	0	0	0	0	3	0	0	0	UBE2U	ENSG00000177414.13_4	6	ENST00000371077.9_4,ENST00000611228.4_1,ENST00000371076.7_1,ENST00000608020.5_1,ENST00000464349.1_1,ENST00000608956.1_1	9,10,9,6,5,4
ENSG00000238653.1	chr1	64850081	64850142	-	62	0	0	0	0	0	0	0	0	0	0	0	0	RNU7-62P	ENSG00000238653.1	1	ENST00000458856.1	1
ENSG00000158966.13_2	chr1	64936475	65158741	+	6345	2377	2483	2690	2297	1811	1537	928	1518	1565	1301	1982	1651	CACHD1	ENSG00000158966.13_2	4	ENST00000290039.5_1,ENST00000495994.5_1,ENST00000470527.1_1,ENST00000486580.1_1	27,26,27,2
ENSG00000264470.1	chr1	65045530	65045606	+	77	0	0	0	0	0	0	0	0	0	0	0	0	MIR4794	ENSG00000264470.1	1	ENST00000582305.1	1
ENSG00000162437.14_2	chr1	65210778	65298915	+	6070	1661	1598	1904	1685	1456	1152	1048	861	1329	1116	1382	1171	RAVER2	ENSG00000162437.14_2	3	ENST00000294428.7_1,ENST00000371072.8_1,ENST00000418058.1_1	12,12,8
ENSG00000162434.11_2	chr1	65298912	65432187	-	6317	1645	1878	2761	1810	1446	1301	1423	1024	1847	2083	1856	1431	JAK1	ENSG00000162434.11_2	6	ENST00000342505.4_1,ENST00000481702.1_1,ENST00000465376.5_1,ENST00000471473.1_1,ENST00000494904.1_1,ENST00000467764.1_1	25,2,7,4,2,2
ENSG00000234784.2_4	chr1	65384126	65384366	+	241	0	0	0	0	0	0	0	0	0	0	0	0	RP11-182I10.1	ENSG00000234784.2_4	1	ENST00000442855.2_1	1
ENSG00000233877.2_4	chr1	65407662	65408048	+	387	0	0	0	0	0	0	0	0	0	0	0	0	RP11-182I10.2	ENSG00000233877.2_4	1	ENST00000446914.2_1	1
ENSG00000226891.7_4	chr1	65437908	65468172	-	6617	58	48	68	33	17	12	14	8	11	6	20	16	RP11-182I10.3	ENSG00000226891.7_4	9	ENST00000447748.5_1,ENST00000635398.1_1,ENST00000635626.1_1,ENST00000634775.1_1,ENST00000634604.1_1,ENST00000444349.5_1,ENST00000415842.5_1,ENST00000436350.2_1,ENST00000634799.1_1	4,3,2,8,9,4,6,3,4
ENSG00000185031.6_3	chr1	65450291	65451770	-	1480	16	16	22	4	6	0	0	0	4	8	3	0	RP11-182I10.4	ENSG00000185031.6_3	1	ENST00000331747.6_1	1
ENSG00000272506.1_4	chr1	65469153	65469770	-	618	2	26	9	38	8	10	5	3	0	1	9	3	RP4-535B20.4	ENSG00000272506.1_4	1	ENST00000607528.1_1	1
ENSG00000212257.1	chr1	65488651	65488757	-	107	3	19	7	6	0	13	6	8	3	11	14	3	RNU6-1176P	ENSG00000212257.1	1	ENST00000390955.1	1
ENSG00000265996.1	chr1	65523438	65523525	-	88	3	0	9	3	5	0	5	0	4	0	2	16	MIR3671	ENSG00000265996.1	1	ENST00000580455.1	1
ENSG00000199135.1	chr1	65524117	65524191	-	75	0	0	0	0	0	0	0	0	0	0	0	3	MIR101-1	ENSG00000199135.1	1	ENST00000362265.1	1
ENSG00000231485.1_4	chr1	65532310	65533420	-	310	6	3	2	7	0	3	3	0	1	6	11	1	RP4-535B20.1	ENSG00000231485.1_4	1	ENST00000448344.1_1	2
ENSG00000235804.2_4	chr1	65543096	65543814	-	427	0	0	0	0	0	0	0	0	0	0	0	0	RP4-535B20.2	ENSG00000235804.2_4	1	ENST00000416486.2_1	2
ENSG00000234496.2_3	chr1	65558075	65558297	-	223	0	0	0	0	0	0	0	0	0	0	0	0	RP4-535B20.3	ENSG00000234496.2_3	1	ENST00000453850.2_1	1
ENSG00000162433.14_3	chr1	65613232	65697828	+	7578	1237	1467	2059	1651	1307	1097	677	899	1880	1626	1740	1468	AK4	ENSG00000162433.14_3	8	ENST00000497030.5_1,ENST00000545314.5_1,ENST00000470888.6_1,ENST00000546702.5_2,ENST00000395334.6_1,ENST00000327299.7_1,ENST00000474968.5_1,ENST00000479060.1_1	6,6,5,5,6,5,5,5
ENSG00000231622.1_3	chr1	65620163	65620333	+	171	0	0	0	0	0	0	0	0	0	0	0	0	RP4-700A9.1	ENSG00000231622.1_3	1	ENST00000439662.1_1	1
ENSG00000116675.15_3	chr1	65713902	65881552	+	6954	596	631	937	772	619	455	397	409	346	301	360	335	DNAJC6	ENSG00000116675.15_3	8	ENST00000463018.5_1,ENST00000494710.6_1,ENST00000263441.11_1,ENST00000395325.7_3,ENST00000483402.1_1,ENST00000371069.4_3,ENST00000472787.1_1,ENST00000498720.1_1	5,12,20,19,3,19,2,4
ENSG00000229294.1_5	chr1	65745139	65772204	-	512	0	0	0	0	0	0	0	0	0	0	0	0	RP5-1044H5.1	ENSG00000229294.1_5	1	ENST00000435739.1_1	2
ENSG00000234144.1_3	chr1	65764438	65764663	-	226	0	0	0	0	0	0	0	0	0	0	0	0	RP5-1044H5.2	ENSG00000234144.1_3	1	ENST00000428703.1_1	1
ENSG00000222624.1	chr1	65881499	65881689	+	191	0	0	0	0	6	0	0	0	0	0	0	0	RNU2-15P	ENSG00000222624.1	1	ENST00000410692.1	1
ENSG00000213625.8_3	chr1	65886270	65901690	+	5237	1128	1215	1316	1008	1204	917	688	720	1183	860	1023	945	LEPROT	ENSG00000213625.8_3	6	ENST00000475108.5_1,ENST00000371065.8_1,ENST00000497874.5_1,ENST00000488747.5_1,ENST00000484243.1_1,ENST00000613538.1_1	3,4,3,4,3,5
ENSG00000116678.19_4	chr1	65886335	66107242	+	11370	231	342	418	341	237	220	265	231	270	321	345	312	LEPR	ENSG00000116678.19_4	8	ENST00000371059.7_1,ENST00000371060.7_2,ENST00000349533.10_2,ENST00000462765.5_1,ENST00000344610.12_1,ENST00000616738.4_2,ENST00000371058.1_1,ENST00000471762.1_1	20,20,20,13,19,19,18,3
ENSG00000237852.1_5	chr1	65952089	65959871	+	423	3	0	0	0	0	0	0	4	0	0	0	0	RP4-630A11.3	ENSG00000237852.1_5	1	ENST00000429871.1_1	2
ENSG00000238931.1	chr1	66037232	66037335	+	104	0	0	1	0	0	0	0	0	0	0	0	0	snoU13	ENSG00000238931.1	1	ENST00000459362.1	1
ENSG00000224570.1_4	chr1	66041812	66044063	-	1797	0	0	0	0	0	0	0	0	0	0	0	0	RP11-430H12.2	ENSG00000224570.1_4	1	ENST00000426714.1_1	2
ENSG00000285079.1_1	chr1	66169645	66180530	+	2316	0	0	0	0	0	0	0	0	0	0	0	0	RP11-433N2.1	ENSG00000285079.1_1	1	ENST00000646875.1_1	3
ENSG00000239319.2	chr1	66226743	66227035	-	293	0	0	0	0	0	0	0	0	0	0	0	0	RN7SL854P	ENSG00000239319.2	1	ENST00000459767.2	1
ENSG00000184588.17_4	chr1	66258197	66840262	+	8644	15	15	20	21	5	5	9	16	20	25	60	70	PDE4B	ENSG00000184588.17_4	18	ENST00000329654.8_2,ENST00000341517.8_2,ENST00000423207.6_2,ENST00000531358.1_1,ENST00000532040.1_1,ENST00000526666.1_1,ENST00000412480.6_1,ENST00000371048.7_1,ENST00000490695.1_1,ENST00000491340.2_1,ENST00000528771.5_1,ENST00000371045.9_1,ENST00000531025.5_2,ENST00000526197.5_1,ENST00000480109.2_1,ENST00000534463.5_1,ENST00000524999.1_1,ENST00000483863.2_1	17,17,15,2,3,3,6,5,5,3,5,10,5,5,10,4,3,2
ENSG00000227466.1_4	chr1	66508183	66516401	-	456	0	0	0	0	0	0	0	0	0	0	0	0	RP11-397C12.1	ENSG00000227466.1_4	1	ENST00000424138.1_1	3
ENSG00000223152.1	chr1	66560144	66560229	-	86	0	0	0	0	0	0	0	0	0	0	0	0	RNU4-88P	ENSG00000223152.1	1	ENST00000411220.1	1
ENSG00000118473.21_3	chr1	66999066	67213982	+	10477	0	0	0	4	0	0	0	0	1	0	3	1	SGIP1	ENSG00000118473.21_3	14	ENST00000237247.10_2,ENST00000371039.5_2,ENST00000493564.1_1,ENST00000424320.5_1,ENST00000468286.5_1,ENST00000497055.1_1,ENST00000371037.8_1,ENST00000484988.2_1,ENST00000483060.1_1,ENST00000480548.5_1,ENST00000487507.1_1,ENST00000435165.2_2,ENST00000320161.10_1,ENST00000468570.1_1	27,22,4,13,10,2,25,2,6,7,3,8,2,2
ENSG00000264720.1	chr1	67094123	67094200	+	78	0	0	0	0	0	0	0	0	0	0	0	0	MIR3117	ENSG00000264720.1	1	ENST00000584034.1	1
ENSG00000248458.2_4	chr1	67131547	67142710	-	1156	0	0	0	0	0	0	0	0	0	0	0	0	RP4-598P13.1	ENSG00000248458.2_4	1	ENST00000502413.2_1	2
ENSG00000221655.2	chr1	67196650	67196741	-	92	0	0	0	0	0	0	0	0	0	0	0	0	AL354978.1	ENSG00000221655.2	1	ENST00000408728.2	1
ENSG00000152760.9_2	chr1	67218142	67244470	+	3100	0	0	0	0	0	0	0	0	0	0	0	0	TCTEX1D1	ENSG00000152760.9_2	6	ENST00000525663.5_1,ENST00000282670.6_1,ENST00000528352.1_1,ENST00000491611.1_1,ENST00000448074.1_1,ENST00000489510.1_1	3,5,7,5,2,2
ENSG00000172410.4_2	chr1	67263424	67266939	-	715	0	0	0	0	0	0	0	0	0	0	0	0	INSL5	ENSG00000172410.4_2	1	ENST00000304526.2_1	2
ENSG00000152763.16_2	chr1	67278568	67390570	-	6704	128	88	49	112	90	80	62	41	114	104	87	100	WDR78	ENSG00000152763.16_2	12	ENST00000371026.7_1,ENST00000491297.6_1,ENST00000464352.6_1,ENST00000371023.7_1,ENST00000531552.1_1,ENST00000469450.1_1,ENST00000493572.1_1,ENST00000531980.5_1,ENST00000371022.3_1,ENST00000532629.1_1,ENST00000488333.2_1,ENST00000474506.1_1	17,14,12,10,3,3,2,5,6,4,2,2
ENSG00000231080.1_4	chr1	67292625	67294241	+	861	0	0	0	0	0	0	0	0	0	0	0	0	RP11-342H21.2	ENSG00000231080.1_4	1	ENST00000456389.1_1	2
ENSG00000198160.14_3	chr1	67390578	67454302	+	8273	1950	1756	2665	2045	1619	1480	1177	1139	2279	1664	2200	1860	MIER1	ENSG00000198160.14_3	11	ENST00000355977.10_2,ENST00000371018.7_2,ENST00000357692.6_3,ENST00000401041.5_2,ENST00000371016.5_2,ENST00000371014.5_2,ENST00000371012.6_1,ENST00000401042.7_2,ENST00000355356.3_3,ENST00000479067.1_1,ENST00000493357.1_1	14,16,15,14,16,15,5,14,13,7,2
ENSG00000116704.7_2	chr1	67465015	67519782	-	6162	469	483	613	540	406	375	324	280	547	697	636	591	SLC35D1	ENSG00000116704.7_2	1	ENST00000235345.5_1	12
ENSG00000203963.11_3	chr1	67557848	67697536	-	5022	0	0	0	0	0	0	0	0	0	0	0	0	C1orf141	ENSG00000203963.11_3	8	ENST00000371007.6_2,ENST00000371006.5_2,ENST00000475209.6_2,ENST00000371004.6_1,ENST00000621590.4_2,ENST00000544837.5_1,ENST00000448166.6_2,ENST00000603691.1_2	8,6,7,5,3,10,10,8
ENSG00000252433.1	chr1	67568328	67568462	-	135	0	0	0	0	0	0	0	0	0	0	0	0	SNORA31	ENSG00000252433.1	1	ENST00000516624.1	1
ENSG00000275678.1_4	chr1	67587288	67589639	-	2352	0	0	0	0	0	0	0	0	0	0	0	0	RP4-547N15.3	ENSG00000275678.1_4	1	ENST00000621423.1_1	1
ENSG00000162594.15_4	chr1	67604590	67725662	+	3267	0	0	0	4	0	0	0	0	0	0	3	0	IL23R	ENSG00000162594.15_4	5	ENST00000637002.1_1,ENST00000347310.9_1,ENST00000425614.3_2,ENST00000473881.2_1,ENST00000395227.2_1	11,11,6,4,3
ENSG00000253074.1	chr1	67661823	67661926	+	104	0	0	0	0	0	0	0	0	0	0	0	0	RNU6-586P	ENSG00000253074.1	1	ENST00000517265.1	1
ENSG00000221733.1	chr1	67705123	67705210	-	88	0	0	0	0	0	0	0	0	0	0	0	0	AL109843.1	ENSG00000221733.1	1	ENST00000408806.1	1
ENSG00000252116.1	chr1	67733284	67733409	-	126	0	0	0	0	0	0	0	0	0	0	0	0	RNU4ATAC4P	ENSG00000252116.1	1	ENST00000516307.1	1
ENSG00000228523.1_4	chr1	67743735	67744462	+	728	0	0	0	0	0	0	0	0	0	0	0	0	RP11-131O15.2	ENSG00000228523.1_4	1	ENST00000432257.1_1	1
ENSG00000081985.10_3	chr1	67773047	67862583	+	4233	46	50	54	45	72	43	24	29	75	48	97	85	IL12RB2	ENSG00000081985.10_3	6	ENST00000262345.5_2,ENST00000544434.5_1,ENST00000541374.5_2,ENST00000371000.5_2,ENST00000441640.3_1,ENST00000465396.1_1	16,14,14,16,5,4
ENSG00000142864.14_4	chr1	67873493	67896098	-	7676	4749	5004	5074	4192	4808	3726	3604	3329	6338	6031	6221	5012	SERBP1	ENSG00000142864.14_4	8	ENST00000370994.8_2,ENST00000370995.6_3,ENST00000361219.10_2,ENST00000370990.5_3,ENST00000493607.1_1,ENST00000462814.1_1,ENST00000484880.1_1,ENST00000490406.1_1	8,8,8,8,4,2,4,5
ENSG00000223263.1	chr1	67882897	67883001	+	105	0	0	0	0	0	0	0	0	0	0	0	0	RNU6-387P	ENSG00000223263.1	1	ENST00000411331.1	1
ENSG00000235200.2_3	chr1	67988030	67998295	+	805	0	0	0	0	0	0	0	0	0	0	0	0	RP11-393N21.2	ENSG00000235200.2_3	3	ENST00000635350.1_1,ENST00000634424.1_1,ENST00000230113.4_1	4,4,5
ENSG00000207504.1	chr1	68006810	68006916	+	107	0	0	0	0	0	0	0	0	0	0	0	0	RNU6-1031P	ENSG00000207504.1	1	ENST00000384773.1	1
ENSG00000238139.2_4	chr1	68026756	68027129	+	374	0	0	0	0	0	0	0	0	0	0	0	0	RP11-393N21.1	ENSG00000238139.2_4	1	ENST00000414338.2_1	1
ENSG00000242482.2	chr1	68122516	68122812	-	297	0	0	0	0	0	0	0	0	0	0	0	0	RN7SL392P	ENSG00000242482.2	1	ENST00000473024.2	1
ENSG00000232048.2_3	chr1	68125838	68126696	-	859	0	0	0	0	0	0	0	0	0	0	0	1	RP5-817C23.1	ENSG00000232048.2_3	1	ENST00000426952.2_1	1
ENSG00000116717.11_2	chr1	68150744	68154021	+	2069	207	208	385	285	249	185	141	113	291	405	353	282	GADD45A	ENSG00000116717.11_2	5	ENST00000370986.8_1,ENST00000617962.1_1,ENST00000370985.3_1,ENST00000460575.1_1,ENST00000484245.1_1	4,3,3,2,2
ENSG00000172380.5_2	chr1	68167149	68299150	-	4724	1510	1683	2334	1870	1501	1157	786	827	1197	1017	1606	1428	GNG12	ENSG00000172380.5_2	2	ENST00000370982.3_1,ENST00000494936.1_1	4,2
ENSG00000238778.1	chr1	68238276	68238336	-	61	0	3	0	1	0	0	0	2	2	0	2	0	RNU7-80P	ENSG00000238778.1	1	ENST00000459562.1	1
ENSG00000232284.7_5	chr1	68297986	68668670	+	3465	64	89	137	112	46	52	14	21	41	71	19	66	RP11-518D3.1	ENSG00000232284.7_5	4	ENST00000420587.5_1,ENST00000413628.5_1,ENST00000414904.1_1,ENST00000434072.1_1	10,9,4,2
ENSG00000235055.3_4	chr1	68509013	68509916	+	904	0	0	2	2	0	0	0	0	0	0	13	0	RP4-609E1.2	ENSG00000235055.3_4	1	ENST00000435784.2_1	1
ENSG00000162595.6_4	chr1	68511579	68517314	-	2039	1	2	32	31	0	8	9	5	0	0	5	0	DIRAS3	ENSG00000162595.6_4	2	ENST00000370981.2_2,ENST00000646789.1_1	4,2
ENSG00000228431.1_3	chr1	68515043	68515428	-	386	0	0	0	0	0	0	0	0	5	0	0	0	RP4-609E1.3	ENSG00000228431.1_3	1	ENST00000439327.1_1	1
ENSG00000263542.1	chr1	68523860	68523945	+	86	0	0	0	0	0	0	0	0	0	0	0	0	AL157407.1	ENSG00000263542.1	1	ENST00000581793.1	1
ENSG00000116729.13_4	chr1	68564156	68698803	-	4469	1346	1350	1377	1280	1119	963	872	783	780	982	1146	989	WLS	ENSG00000116729.13_4	14	ENST00000354777.6_1,ENST00000262348.8_1,ENST00000370976.7_1,ENST00000498615.1_1,ENST00000491811.5_1,ENST00000497187.5_1,ENST00000534713.5_1,ENST00000533537.5_1,ENST00000530486.5_2,ENST00000370973.2_2,ENST00000471243.2_1,ENST00000491076.1_1,ENST00000527864.1_1,ENST00000370971.1_1	12,12,11,2,8,6,5,4,5,5,4,5,4,2
ENSG00000234383.1_3	chr1	68627444	68628773	-	1330	27	17	15	25	16	18	13	34	30	44	31	44	RP11-518D3.3	ENSG00000234383.1_3	1	ENST00000422584.1_1	1
ENSG00000221203.1	chr1	68649201	68649293	-	93	0	0	0	0	0	5	0	0	0	0	0	0	MIR1262	ENSG00000221203.1	1	ENST00000408276.1	1
ENSG00000229133.1_3	chr1	68708157	68708738	-	582	0	0	0	0	0	0	0	0	0	0	0	0	RP11-518D3.4	ENSG00000229133.1_3	1	ENST00000444127.1_1	1
ENSG00000225242.2_3	chr1	68748071	68748305	+	235	0	0	0	0	0	0	0	0	0	0	0	0	RP4-740O15.1	ENSG00000225242.2_3	1	ENST00000430845.2_1	1
ENSG00000237622.1_3	chr1	68841010	68841346	-	337	0	0	0	0	0	0	0	0	0	0	0	0	RP5-1033K19.1	ENSG00000237622.1_3	1	ENST00000434209.1_1	1
ENSG00000229440.1_4	chr1	68847124	68847340	-	217	0	0	0	0	0	0	0	0	0	0	0	0	RP5-1033K19.2	ENSG00000229440.1_4	1	ENST00000421309.1_1	1
ENSG00000116745.6_2	chr1	68894505	68915642	-	2610	0	0	0	0	0	0	0	0	0	0	0	0	RPE65	ENSG00000116745.6_2	1	ENST00000262340.5_1	14
ENSG00000024526.16_3	chr1	68939835	68962904	-	5904	1414	1329	1561	1315	1060	934	883	768	1303	982	1413	1149	DEPDC1	ENSG00000024526.16_3	5	ENST00000456315.6_2,ENST00000370966.9_2,ENST00000488146.5_1,ENST00000489862.1_1,ENST00000525124.1_3	12,11,4,13,5
ENSG00000233589.1_4	chr1	68944812	68949222	+	960	1	0	0	0	0	0	0	0	0	0	0	1	RP4-694A7.2	ENSG00000233589.1_4	1	ENST00000425820.1_1	2
ENSG00000234264.1_4	chr1	68962359	69004310	+	1247	3	3	0	0	4	0	0	0	0	0	4	4	RP4-694A7.4	ENSG00000234264.1_4	1	ENST00000428732.1_1	3
ENSG00000225167.1_3	chr1	68980058	68980352	-	295	0	0	0	0	0	0	0	0	0	0	0	0	RP4-694A7.3	ENSG00000225167.1_3	1	ENST00000443918.1_1	1
ENSG00000285041.1_1	chr1	69099384	69106108	+	2636	0	0	0	0	0	0	0	0	0	0	0	0	RP4-629B2.1	ENSG00000285041.1_1	1	ENST00000646352.1_1	3
ENSG00000285407.1_1	chr1	69144885	69409135	+	2810	7	22	25	15	25	10	8	13	18	21	36	7	RP11-520E6.1	ENSG00000285407.1_1	3	ENST00000643361.1_1,ENST00000646995.1_1,ENST00000645269.1_1	7,2,2
ENSG00000285473.1_1	chr1	69439693	69489241	+	716	0	1	0	0	0	0	0	0	0	0	0	0	RP11-520E6.2	ENSG00000285473.1_1	1	ENST00000644104.1_1	4
ENSG00000223883.1_3	chr1	69521581	69650686	+	627	0	0	0	0	0	3	9	0	3	4	13	3	RP11-424D14.1	ENSG00000223883.1_3	1	ENST00000425517.1_1	5
ENSG00000235446.1_4	chr1	69709055	69715106	-	434	0	0	0	0	0	0	0	0	0	0	0	0	RP11-74K19.1	ENSG00000235446.1_4	1	ENST00000439878.1_1	2
ENSG00000229639.1_3	chr1	69898938	69901092	+	458	0	0	0	0	0	0	0	0	0	0	0	0	RP3-380B4.1	ENSG00000229639.1_3	1	ENST00000448001.1_1	2
ENSG00000033122.18_3	chr1	70034081	70617628	+	14652	1	7	6	0	0	6	0	0	4	0	0	7	LRRC7	ENSG00000033122.18_3	13	ENST00000310961.9_2,ENST00000370958.5_1,ENST00000035383.9_2,ENST00000415775.2_1,ENST00000588515.5_3,ENST00000609498.5_3,ENST00000608815.5_3,ENST00000608744.5_3,ENST00000609072.5_3,ENST00000608470.5_2,ENST00000607936.5_2,ENST00000565615.1_1,ENST00000441830.1_1	27,8,25,21,6,5,6,6,7,3,4,1,3
ENSG00000270615.1_4	chr1	70072538	70073984	-	1447	0	0	0	0	0	0	0	0	0	0	0	0	RP11-379C1.1	ENSG00000270615.1_4	1	ENST00000603525.1_1	1
ENSG00000240692.2	chr1	70345275	70345577	+	303	0	0	0	0	0	0	0	0	0	0	0	0	RN7SL538P	ENSG00000240692.2	1	ENST00000494227.2	1
ENSG00000229359.2_3	chr1	70385005	70386000	+	996	0	0	0	0	0	0	0	0	0	0	0	0	PIN1L	ENSG00000229359.2_3	2	ENST00000412108.1_1,ENST00000439639.2_1	1,1
ENSG00000237919.5_4	chr1	70479665	70496905	-	948	0	0	0	0	0	0	0	0	0	0	0	0	RP11-181B18.1	ENSG00000237919.5_4	2	ENST00000414132.5_2,ENST00000425754.1_1	4,2
[truncated: 58,660 more rows]

## Sheet: ciri2
#chrom	start	end	name	score	strand	ciri2.0.6/CTRL_siRNA1_Rep1.ciri2.txt_BSJ	ciri2.0.6/CTRL_siRNA1_Rep2.ciri2.txt_BSJ	ciri2.0.6/CTRL_siRNA2_Rep1.ciri2.txt_BSJ	ciri2.0.6/CTRL_siRNA2_Rep2.ciri2.txt_BSJ	ciri2.0.6/NONO_siRNA1_Rep1.ciri2.txt_BSJ	ciri2.0.6/NONO_siRNA1_Rep2.ciri2.txt_BSJ	ciri2.0.6/NONO_siRNA2_Rep1.ciri2.txt_BSJ	ciri2.0.6/NONO_siRNA2_Rep2.ciri2.txt_BSJ	ciri2.0.6/SFPQ_siRNA1_Rep1.ciri2.txt_BSJ	ciri2.0.6/SFPQ_siRNA1_Rep2.ciri2.txt_BSJ	ciri2.0.6/SFPQ_siRNA2_Rep1.ciri2.txt_BSJ	ciri2.0.6/SFPQ_siRNA2_Rep2.ciri2.txt_BSJ	name	gids	ntids	tids	mature_length	exons	exon_no	flank_intron	intron_up	intron_down	host_exons	host_length	host_orf_length	dist5	dist3	comments	circ_type	aludist	aludist_up_down	aluname_up_down	aluscore_up_down	mirdist	mirdist_up_down	mirname_up_down	mirscore_up_down	l1dist	l1dist_up_down	l1name_up_down	l1score_up_down	l2dist	l2dist_up_down	l2name_up_down
chr1	237015840	237016388	circ_1	2	+	0	0	0	0	0	0	0	0	2	0	0	0	MTR	ENSG00000116984.12_3	4	ENST00000366576.3_1,ENST00000535889.5_1,ENST00000463959.1_1,ENST00000366577.9_1					6745,6745,6745			5214,10373,1955,10496	2440,3613,0,3765	16925,57260,56926,57231	47330,50893,0,50893	Unannotated SA,Unannotated SA,Unannotated SA,Unannotated SA	Ambiguous circRNA	17966	1683,16283	AluSz6,AluJr	665,880	14600	7361,7239	MIRc,MIRc	188,189	7140	6876,264	L1M5,L1ME4a	500,526	7711	2856,4855	L2a,L2b
chr15	42060643	42060980	circ_2	5	+	0	0	0	0	5	0	0	0	0	0	0	0			0													No annotated SS	N/A	6325	4266,2059	AluSz,AluY	2124,2412	27117	13450,13667	MIRb,MIRb	567,771	22509	9014,13495	HAL1,L1ME3B	406,286	10872	8170,2702	L2,L2a
chr2	210962809	211019314	circ_3	2	-	2	0	0	0	0	0	0	0	0	0	0	0	KANSL1L	ENSG00000144445.16_3	6	ENST00000457374.5_1,ENST00000281772.13_3,ENST00000428655.5_1,ENST00000460256.1_1,ENST00000452086.5_1,ENST00000418791.5_3						22330,22330,22330,17746,22330,22330		2256,4739,1504,368,2326,3548	0,0,482,0,0,0	712,16793,925,50395,16737,16737	57763,76663,54653,18281,57763,75653	Unannotated SA,Unannotated SA,Unannotated SA,Unannotated SA,Unannotated SA,Unannotated SA	Ambiguous circRNA	1423	539,884	AluSx1,AluSx3	2258,1909	51906	44070,7836	MIR,MIR	560,228	6711	1437,5274	L1ME3C,L1MEg	416,1827	9304	7688,1616	L2,L2c
chr2	219618875	219619015	circ_4	6	+	0	0	0	6	0	0	0	0	0	0	0	0			0													No annotated SS	N/A	6615	1946,4669	AluSp,AluSp	2466,2241	5398	2765,2633	MIR,MIRb	319,557	14802	10486,4316	L1MD1,L1MD	3515,834	70720	19497,51223	L2b,L2a
chr19	42621401	42664544	circ_5	3	-	3	0	0	0	0	0	0	0	0	0	0	0	POU2F2	ENSG00000028277.21_4	2	ENST00000524801.6_4,ENST00000636631.1_3	331,331	5,5	6-5-4-3-2,6-5-4-3-2	16411	15571,16761	245,245		615,584	0,0	15633,16933	467,326		Other circRNA	8274	3694,4580	AluSx,AluSz	1715,2356	2698	2034,664	MIRb,MIRc	405,220	22660	3377,19283	L1MC4a,L1PB4	312,840	3013	248,2765	L2b,L2c
chr1	65131739	65141666	circ_6	6	+	6	0	0	0	0	0	0	0	0	0	0	0	CACHD1	ENSG00000158966.13_2	3	ENST00000290039.5_1,ENST00000495994.5_1,ENST00000470527.1_1	693,693,693	6,6,6	16-17-18-19-20-21,15-16-17-18-19-20,16-17-18-19-20-21	2290	1378,1378,1378	912,912,912		5248,5521,5233	3645,0,0	195265,160142,102380	17075,17070,17075		Ambiguous circRNA	525	28,497	AluYc3,AluJb	2502,1110	12481	2982,9499	MIR,MIRb	318,208	27694	3488,24206	L1MEg,L1MB5	432,410	18235	7021,11214	L2c,L2b
chr2	204231599	204231767	circ_7	3	+	0	0	0	0	0	0	0	0	0	0	3	0	ABI2	ENSG00000138443.15_4	11	ENST00000295851.9_3,ENST00000261018.11_3,ENST00000261017.9_3,ENST00000447762.5_1,ENST00000430418.5_2,ENST00000413635.5_1,ENST00000424558.5_2,ENST00000431886.5_1,ENST00000417864.5_1,ENST00000376135.5_1,ENST00000422511.6_1	167,167,167,167,167,167,167,167,167,167,167	1,1,1,1,1,1,1,1,1,1,1	2,2,2,3,2,3,2,2,2,2,2	47211.36363636364	38246,38246,38246,15199,38246,24647,38246,38246,38246,38246,38246	13164,13164,13164,13164,13164,9013,13164,7776,13164,13164,13164		22198,6627,6474,737,1667,511,2230,575,1556,564,2707	1531,1531,1418,226,1368,159,1514,323,0,0,1432	38658,38638,38597,38595,38485,38482,38482,38478,38470,38418,38393	80679,65128,65129,13262,60484,9088,60904,13233,60225,16252,61552		Ambiguous circRNA	1637	948,689	AluY,AluJb	2509,1839	13456	9527,3929	MIR3,MIR3	270,297	26574	26046,528	L1MA9,L1ME4a	4883,376	68935	25503,43432	L2a,L2a
chr14	65551633	65552618	circ_8	8	+	0	0	0	8	0	0	0	0	0	0	0	0			0													No annotated SS	N/A	6736	2129,4607	AluJo,AluJb	1524,1863	31566	2742,28824	MIR,MIR	484,321	28399	316,28083	L1MC,L1ME1	286,457	10481	4885,5596	L2c,L2a
chr7	30590251	30601744	circ_9	3	-	0	0	0	0	0	0	0	0	0	0	0	3	AC005154.6	ENSG00000196295.11_5	1	ENST00000434399.5_1	807	2	3-2	26764	614	26150		1212	0	697	34327		Other circRNA	5695	3067,2628	AluY,AluJr	2122,1350	3589	2481,1108	MIR3,MIRb	420,684	14848	173,14675	L1M5,L1MB3	255,852	23079	4904,18175	L2,L2b
chr10	103918949	103919325	circ_10	8	+	0	0	0	0	0	0	0	0	0	0	8	0	NOLC1	ENSG00000166197.16_4	8	ENST00000605788.5_1,ENST00000405356.5_2,ENST00000464969.6_1,ENST00000488254.6_2,ENST00000603946.5_1,ENST00000461421.5_2,ENST00000476468.5_2,ENST00000370007.5_2	250,280,250,250,250,250,250,280	2,2,2,2,2,2,2,2	6-7,6-7,5-6,6-7,2-3,3-4,5-6,6-7	2017.5	979,979,979,979,6663,979,979,979	328,328,328,328,328,328,328,328		3919,3954,2276,2428,3208,771,837,3714	2087,2117,219,2090,139,0,0,2113	7017,7017,6798,6789,6789,6784,6780,6778	4298,4303,3031,3032,4298,991,370,4302		Ambiguous circRNA	1768	98,1670	AluSq,AluJb	1876,1673	13073	4702,8371	MIRb,MIR	446,359	33394	27185,6209	L1M5,L1ME4a	266,576	18548	8439,10109	L2b,L2c
chr1	33019059	33023566	circ_11	39	+	0	11	0	6	0	9	7	0	0	0	0	6	RP1-27O5.3,ZBTB8A	ENSG00000254553.1_5,ENSG00000160062.14_3	3	ENST00000373510.8_1,ENST00000316459.4_1,ENST00000480336.1_1					13887,13887,16895			7070,1938,3437	1323,1020,1534	14032,14030,88402	47974,43025,42827	Unannotated SD,Unannotated SD,Unannotated SD	Ambiguous circRNA	1916	766,1150	AluSx,AluSx1	2172,1830	68772	4593,64179	MIR,MIRb	402,211	32023	21831,10192	L1MEg,L1ME2	256,3461	15142	7353,7789	L2c,L2a
chr6	31504276	31508441	circ_12	9	-	0	0	0	0	0	0	0	0	9	0	0	0	ATP6V1G2-DDX39B,DDX39B	ENSG00000254870.5_3,ENSG00000198563.13_4	5	ENST00000396172.5_1,ENST00000431908.5_1,ENST00000419338.5_3,ENST00000456662.5_2,ENST00000376185.5_1	744,525,744,744,744	4,2,4,4,4	5-4-3-2,3-2,5-4-3-2,5-4-3-2,7-6-5-4	2166.8	1286,1286,732,1169,1286	1015,1015,1015,1015,1015		2122,908,922,926,2026	0,0,0,0,0	1784,1317,820,1273,5918	6281,5198,1105,1093,6281		Ambiguous circRNA	5136	2934,2202	AluJr,AluJb	1577,1828	3266	2477,789	MIR,MIRc	224,213	23831	92,23739	L1MDa,L1MC5	315,689	45660	24835,20825	L2a,L2a
chr20	48760038	48767852	circ_13	11	-	3	0	0	0	0	0	0	0	0	0	8	0	TMEM189	ENSG00000240849.10_3	1	ENST00000453505.6_1	222	2	3-2	14757	2202	12555		2021	0	2419	19458		AUG circRNA	1014	263,751	AluY,AluSx1	2522,2094	1489	150,1339	MIRc,MIRc	230,325	11156	5852,5304	L1MB7,L1MC3	1862,2938	3269	3137,132	L2b,L2a
chr10	104018685	104103939	circ_14	7	+	0	7	0	0	0	0	0	0	0	0	0	0	GBF1	ENSG00000107862.4_3	1	ENST00000369983.3_1	302	3	2-3-4	20222	13148	7074		6363	5541	13397	38717		AUG circRNA	442	126,316	AluSp,AluY	2398,2389	57069	14012,43057	MIR3,MIRb	361,242	31460	4461,26999	L1M5,L1MD2	923,4116	51108	6390,44718	L2c,L2a
chr3	149260121	149290787	circ_15	12	-	0	0	0	0	0	0	0	0	0	0	0	12	WWTR1	ENSG00000018408.14_3	4	ENST00000465804.5_1,ENST00000360632.7_1,ENST00000467467.5_1,ENST00000472417.1_2	338,338,338,338	2,2,2,2	5-4,4-3,4-3,3-2	78031.5	83876,83876,83876,3034	14366,14366,14366,14366		5022,2096,1596,949	0,0,0,0	130273,85101,85025,3252	25100,22090,21725,21494		Other circRNA	5933	1812,4121	AluSx,AluSx1	2231,2398	19765	11745,8020	MIRb,MIRb	596,443	17971	13178,4793	L1MC4a,L1ME4a	264,431	38028	31906,6122	L2b,L2a
chr16	70247563	70256383	circ_16	5	-	0	0	0	0	0	0	0	0	0	0	5	0	RP11-296I10.6	ENSG00000261556.9_4	1	ENST00000581050.5_1						2376		1885	0	3553	5920	Unannotated SD	Other circRNA	5015	4831,184	AluSq2,AluSx	2351,1455	46802	33505,13297	MIRc,MIRb	418,349	38994	5968,33026	L1ME4a,L1M5	408,544	29707	11300,18407	L2a,L2b
chr12	111916873	111951343	circ_17	8	-	0	0	0	0	0	0	0	0	0	0	0	8	ATXN2	ENSG00000204842.15_5	2	ENST00000643669.1_1,ENST00000647305.1_1	1173,1167	9,9	19-18-17-16-15-14-13-12-11,19-18-17-16-15-14-13-12-11	10943	2615,2615	8328,8328		4152,3618	0,0	85583,85583	26847,9644		Other circRNA	1018	985,33	AluSz,AluSz	1888,2276	43180	8012,35168	MIRc,MIRc	274,235	10066	9721,345	L1MC4a,L1ME1	366,1738	24663	16637,8026	L2c,L2b
chr1	10523487	10527362	circ_18	6	-	0	0	6	0	0	0	0	0	0	0	0	0	DFFA	ENSG00000160049.11_2	2	ENST00000377038.7_1,ENST00000377036.2_1						222,222		6026,1398	0,0	5221,5183	6909,963	Unannotated SA,Unannotated SA	Other circRNA	3370	201,3169	AluSx1,AluSx	2378,2325	18689	943,17746	MIR,MIRc	688,210	40885	13394,27491	L1MC4,HAL1-3A_ME	675,325	32236	1394,30842	L2c,L2a
chr8	141554311	141557726	circ_19	6	-	0	0	6	0	0	0	0	0	0	0	0	0	AGO2	ENSG00000123908.11_3	3	ENST00000220592.9_2,ENST00000519980.5_1,ENST00000523609.5_1	249,249,249	2,2,2	14-13,14-13,13-12	4342	1487,1487,1487	2855,2855,2855		14562,3123,3032	0,0,0	87992,87919,87919	24057,12792,12792		Ambiguous circRNA	957	406,551	AluSx,AluJb	2306,1160	11681	11278,403	MIRb,MIRb	200,348	33509	27868,5641	L1ME1,L1MEg	708,412	52149	44748,7401	L2b,L2
chr3	47777523	47814426	circ_20	15	-	0	4	0	0	0	0	0	0	11	0	0	0	SMARCC1	ENSG00000173473.10_3	3	ENST00000254480.9_1,ENST00000425518.5_1,ENST00000454240.1_1	377,377,296	4,4,3	5-4-3-2,5-4-3-2,4-3-2	15746.666666666666	8667,9086,8667	6940,6940,6940		6347,3799,631	0,0,0	8981,9170,8945	150762,148444,6997		Ambiguous AUG circRNA	329	189,140	AluSq2,AluJb	1812,795	29370	6078,23292	MIR,MIRb	326,563	10312	2886,7426	L1MA3,L1M5	231,633	20154	69,20085	L2c,L2a
chr6	52132662	52134024	circ_21	36	-	12	0	0	0	16	0	0	0	0	0	8	0	MCM3	ENSG00000112118.18_3	5	ENST00000229854.11_2,ENST00000596288.5_2,ENST00000616552.4_2,ENST00000419835.7_3,ENST00000421471.1_1	243,243,243,243,243	2,2,2,2,2	14-13,14-13,14-13,13-12,5-4	4244	3075,3075,3075,3075,3075	1169,1169,1169,1169,1169		3066,3152,3191,2507,1021	0,0,0,0,45	15525,15611,15655,15655,4549	3856,3856,3851,3279,3244		Other circRNA	868	819,49	AluSx3,AluJb	2420,1977	9496	289,9207	MIRb,MIRb	242,409	19074	16477,2597	L1ME3,L1MC	621,566	18073	2505,15568	L2c,L2b
chr16	2807781	2809662	circ_22	4	+	0	0	0	0	0	0	4	0	0	0	0	0	SRRM2	ENSG00000167978.16_4	6	ENST00000301740.12_2,ENST00000576924.5_2,ENST00000575009.5_1,ENST00000630499.2_1,ENST00000571378.5_2,ENST00000570971.2_1	477,477,477,477,477,477	6,6,6,6,6,6	4-5-6-7-8-9,4-5-6-7-8-9,3-4-5-6-7-8,3-4-5-6-7-8,3-4-5-6-7-8,2-3-4-5-6-7	842	202,202,202,202,202,202	640,640,640,640,640,640		9338,3303,1136,1196,2860,1124	8245,0,0,926,0,748	5452,5155,5143,5106,5065,305	11751,3921,2046,11749,3840,1184		Ambiguous circRNA	15976	3191,12785	AluSc5,AluY	2175,1944	45518	18940,26578	MIR3,MIRc	185,208	39379	6954,32425	L1M,L1MB1	461,3086	39087	39043,44	L2b,L2c
chr2	47273453	47279019	circ_23	4	+	4	0	0	0	0	0	0	0	0	0	0	0	TTC7A	ENSG00000068724.15_3	8	ENST00000409245.5_1,ENST00000319190.9_1,ENST00000394850.6_1,ENST00000441914.5_1,ENST00000409825.5_1,ENST00000491786.5_1,ENST00000484061.5_1,ENST00000484337.5_1	347,347,418,347,347,347,347,347	3,3,4,3,3,3,3,3	17-18-19,16-17-18,16-17-18-19,15-16-17,17-18-19,12-13-14,8-9-10,2-3-4	25196.875	16931,16931,16931,16931,16931,16931,16931,11946	8889,8889,8889,8889,8889,8889,8889,8889		3012,5137,4285,2399,4718,3599,3073,748	2455,2557,2628,984,197,0,0,0	130158,105141,105029,104772,95894,67575,52084,12160	22168,24255,23444,22043,24257,23677,23444,9076		Ambiguous circRNA	5500	3795,1705	AluJo,AluSx	1991,2024	14152	7104,7048	MIR,MIRc	306,250	67806	40641,27165	L1MC4,L1MC4	232,826	10781	4920,5861	L2b,L2c
chr9	111795586	111819602	circ_24	8	-	0	5	0	3	0	0	0	0	0	0	0	0	TMEM245	ENSG00000106771.12_2	3	ENST00000374586.7_1,ENST00000413712.6_1,ENST00000491854.1_1	866,866,866	6,6,6	17-16-15-14-13-12,11-10-9-8-7-6,15-14-13-12-11-10	15834	3032,3032,3032	12802,12802,12802		7962,1961,2419	0,558,0	62623,29971,51166	18155,13403,13219		Ambiguous circRNA	356	148,208	AluSg,AluSx	2379,2132	33475	6599,26876	MIRb,MIR	467,652	6078	4551,1527	L1M5,L1ME3	415,1143	19019	12283,6736	L2,L2b
chr3	133901845	133914026	circ_25	21	-	0	6	0	15	0	0	0	0	0	0	0	0	RYK	ENSG00000163785.12_3	3	ENST00000460933.5_2,ENST00000623711.3_1,ENST00000620660.4_1	389,380,389	4,4,4	10-9-8-7,12-11-10-9,12-11-10-9	12477	7548,7548,7548	4929,4929,4929		2652,2915,2923	1022,0,0	55286,55560,55560	25869,25869,25868		Other circRNA	19348	482,18866	AluSz,AluSz6	2219,957	5450	2089,3361	MIR,MIRc	402,232	25641	8150,17491	L1MC5,L1ME1	360,1307	9419	2755,6664	L2b,L2b
chr16	84793496	84797869	circ_26	4	+	0	4	0	0	0	0	0	0	0	0	0	0	USP10	ENSG00000103194.15_3	4	ENST00000219473.11_3,ENST00000540269.6_1,ENST00000563048.5_1,ENST00000570191.5_3	434,434,434,434	4,4,4,4	7-8-9-10,4-5-6-7,5-6-7-8,8-9-10-11	7798.75	419,14218,419,419	3930,3930,3930,3930		2995,3059,1303,2702	2383,186,105,2395	59913,59896,59887,59887	15318,15659,14752,14931		Ambiguous circRNA	6925	6640,285	AluJo,AluSx1	1446,2266	8025	6052,1973	MIRb,MIRc	208,198	2780	2194,586	L1MA3,L1M5	269,289	31191	3621,27570	L2c,L2b
[truncated: 6,874 more rows]
[truncated: 1 more columns]

## Sheet: find_circ
#chrom	start	end	name	score	strand	CTRL_siRNA1_Rep1.circ_candidates.bed_BSJ	CTRL_siRNA1_Rep2.circ_candidates.bed_BSJ	CTRL_siRNA2_Rep1.circ_candidates.bed_BSJ	CTRL_siRNA2_Rep2.circ_candidates.bed_BSJ	NONO_siRNA1_Rep1.circ_candidates.bed_BSJ	NONO_siRNA1_Rep2.circ_candidates.bed_BSJ	NONO_siRNA2_Rep1.circ_candidates.bed_BSJ	NONO_siRNA2_Rep2.circ_candidates.bed_BSJ	SFPQ_siRNA1_Rep1.circ_candidates.bed_BSJ	SFPQ_siRNA1_Rep2.circ_candidates.bed_BSJ	SFPQ_siRNA2_Rep1.circ_candidates.bed_BSJ	SFPQ_siRNA2_Rep2.circ_candidates.bed_BSJ
chrX	139865339	139866824	circ_1	13809	+	2777	1400	2017	1258	872	700	453	551	1059	813	876	1033
chrX	73065280	73065580	circ_2	1041	-	268	111	100	73	58	74	47	41	71	38	79	81
chr16	68155889	68160513	circ_3	911	+	273	90	67	65	56	29	39	27	86	43	67	69
[truncated: 11,498 more rows]
