# Supplementary material for: The RNA-binding protein SFPQ preserves long-intron splicing and regulates circRNA biogenesis in mammals
Source: eLife. 2021 Jan 21;10:e63088. doi: 10.7554/eLife.63088 (PMC7819710; doi:10.7554/eLife.63088)
Supplement: Supplementary file 4. — Mapping statistics and annotated output from featureCounts, ciri2 and find_circ using RNAseq on HepG2 cells. [file elife-63088-supp4.xlsx]

## Sheet: stats
samples	reads	mapped	chimera	multimappers	multimappers_toomany	unmapped_tooshort	unmapped_other
hg19/STAR/siGFP_LS_rep1	63170797	52303465	533560	9701327	16207	1115283	34515
hg19/STAR/siGFP_LS_rep2	62350344	54990257	696891	6029218	17292	1278837	34740
hg19/STAR/siNC_LS_rep1	62915004	52337728	740259	9193700	19097	1335460	29019
hg19/STAR/siNC_LS_rep2	55482197	44606222	424902	9876576	12187	966973	20239
hg19/STAR/siNONO_siRNA2_rep1	62130527	49881478	545184	11025768	18516	1170358	34407
hg19/STAR/siNONO_siRNA2_rep2	62503077	45353906	709647	15718160	18189	1385174	27648
hg19/STAR/siNONO_siRNA3_rep1	55577480	44771542	684055	9429005	16816	1332296	27821
hg19/STAR/siNONO_siRNA3_rep2	28725675	5860370	66488	22401366	246	463519	174
hg19/STAR/siSFPQ_siRNA3_rep1	39224412	27434718	356104	9620995	84704	1813252	270743
hg19/STAR/siSFPQ_siRNA3_rep2	58862756	52394109	691147	4930346	23035	1473657	41609
hg19/STAR/siSFPQ_siRNA4_rep1	63059039	54302618	767527	7204106	20820	1497750	33745
hg19/STAR/siSFPQ_siRNA4_rep2	62364620	54353161	883433	6241892	19377	1716218	33972

## Sheet: featureCounts
# Program:featureCounts v2.0.0; Command:"/home/tbhmbi/software/subread-2.0.0-Linux-x86_64/bin/featureCounts" "-p" "-a" "/home/tbhmbi/genomes/hg19/annotation/gencode/gencode.gtf" "-o" "hg19/STAR/featureCounts/fc.exon.gene_id.v28.txt.tmp" "-t" "exon" "-g" "gene_id" "-s" "2" "-O" "hg19/STAR/siGFP_LS_rep1.bam" "hg19/STAR/siGFP_LS_rep2.bam" "hg19/STAR/siNC_LS_rep1.bam" "hg19/STAR/siNC_LS_rep2.bam" "hg…
Geneid	Chr	Start	End	Strand	Length	hg19/STAR/siGFP_LS_rep1.bam	hg19/STAR/siGFP_LS_rep2.bam	hg19/STAR/siNC_LS_rep1.bam	hg19/STAR/siNC_LS_rep2.bam	hg19/STAR/siNONO_siRNA2_rep1.bam	hg19/STAR/siNONO_siRNA2_rep2.bam	hg19/STAR/siNONO_siRNA3_rep1.bam	hg19/STAR/siNONO_siRNA3_rep2.bam	hg19/STAR/siSFPQ_siRNA3_rep1.bam	hg19/STAR/siSFPQ_siRNA3_rep2.bam	hg19/STAR/siSFPQ_siRNA4_rep1.bam	hg19/STAR/siSFPQ_siRNA4_rep2.bam	name	gids	ntids	tids	exons	total_exon_length	total_intron_length	longest_exon	longest_intron	ORF_length	ORF_exon_start
ENSG00000223972.5_2	chr1	11869	14409	+	1735	0	0	0	0	0	0	0	0	0	0	0	0	DDX11L1	ENSG00000223972.5_2	2	ENST00000456328.2_1,ENST00000450305.2_1	3,6	1654,626	886,1034	1188,217	500,386	0,0	-1,-1
ENSG00000227232.5_2	chr1	14404	29570	-	1351	24	22	55	36	37	22	43	0	0	25	28	42	WASH7P	ENSG00000227232.5_2	1	ENST00000488147.1_1	11	1340	13826	197	6372	0	13
ENSG00000243485.5_4	chr1	29554	31109	+	1021	0	0	0	0	0	0	1	0	0	0	0	0	RP11-34P13.3	ENSG00000243485.5_4	2	ENST00000473358.1_1,ENST00000469289.1_1	3,2	709,533	834,309	485,400	525,309	0,0	-1,-1
ENSG00000237613.2_2	chr1	34554	36081	-	1219	0	0	0	0	0	0	0	0	0	0	0	0	FAM138A	ENSG00000237613.2_2	2	ENST00000417324.1_1,ENST00000461467.1_1	3,2	1184,588	343,240	620,352	240,240	0,0	5,4
ENSG00000268020.3_4	chr1	52473	53312	+	840	0	0	0	0	0	0	0	0	0	0	0	0	OR4G4P	ENSG00000268020.3_4	1	ENST00000606857.1_1	1	839	0	839	0	0	-1
ENSG00000240361.2_3	chr1	57598	64116	+	1414	0	0	0	0	0	0	0	0	0	0	0	0	OR4G11P	ENSG00000240361.2_3	2	ENST00000642116.1_1,ENST00000492842.2_2	3,1	1411,938	5107,0	1200,938	4060,0	0,0	-1,-1
ENSG00000186092.6_4	chr1	65419	71585	+	2618	0	0	0	0	0	0	0	0	0	0	0	0	OR4F5	ENSG00000186092.6_4	2	ENST00000641515.2_2,ENST00000335137.4_2	3,1	2615,1053	3551,0	2548,1053	3464,0	979,917	2,1
ENSG00000238009.6_5	chr1	89295	133723	-	3726	3	7	5	4	8	9	4	0	0	11	9	5	RP11-34P13.7	ENSG00000238009.6_5	5	ENST00000466430.5_1,ENST00000477740.5_1,ENST00000471248.1_1,ENST00000610542.1_1,ENST00000453576.2_1	4,4,3,4,2	2744,487,626,719,334	28893,36500,17594,12279,4151	2334,211,404,349,192	20460,20460,16251,8123,4151	0,0,0,0,0	6,6,5,6,4
ENSG00000239945.1_5	chr1	89551	91105	-	1319	0	3	1	0	1	1	1	0	0	1	0	0	RP11-34P13.8	ENSG00000239945.1_5	1	ENST00000495576.1_1	2	1317	237	818	237	0	4
ENSG00000233750.3_3	chr1	131025	134836	+	3812	0	0	1	0	0	0	1	0	0	1	0	0	RP11-34P13.10	ENSG00000233750.3_3	1	ENST00000442987.3_1	1	3811	0	3811	0	0	-1
ENSG00000237683.5	chr1	134901	139379	-	2661	2	2	8	2	5	9	5	0	3	9	1	2	AL627309.1	ENSG00000237683.5	1	ENST00000423372.3	2	2659	1819	1758	1819	1812	1
ENSG00000268903.1_4	chr1	135141	135895	-	755	0	2	1	0	1	2	4	0	0	0	0	1	RP11-34P13.15	ENSG00000268903.1_4	1	ENST00000494149.2_2	1	754	0	754	0	0	3
ENSG00000269981.1_4	chr1	137682	137965	-	284	0	0	0	0	2	0	0	0	1	1	0	0	RP11-34P13.16	ENSG00000269981.1_4	1	ENST00000595919.1_1	1	283	0	283	0	0	3
ENSG00000239906.1_4	chr1	139790	140339	-	323	1	0	1	0	1	0	4	0	0	1	4	2	RP11-34P13.14	ENSG00000239906.1_4	1	ENST00000493797.1_1	2	321	228	264	228	0	4
ENSG00000241860.6_4	chr1	141474	173862	-	6195	18	13	25	11	14	27	32	0	21	25	31	18	RP11-34P13.13	ENSG00000241860.6_4	4	ENST00000484859.1_1,ENST00000490997.5_1,ENST00000466557.6_1,ENST00000491962.1_1	2,3,8,3	4858,515,1293,275	3375,3508,26183,2603	3321,203,528,157	3375,3375,9258,2158	0,0,0,0	4,5,10,5
ENSG00000222623.1	chr1	157784	157887	-	104	0	0	0	0	0	0	0	0	0	0	0	0	RNU6-1100P	ENSG00000222623.1	1	ENST00000410691.1	1	103	0	103	0	0	3
ENSG00000241599.1_4	chr1	160446	161525	+	457	0	0	0	0	0	0	0	0	0	0	0	1	RP11-34P13.9	ENSG00000241599.1_4	1	ENST00000496488.1_1	2	455	624	244	624	0	-1
ENSG00000228463.4	chr1	227615	267253	-	3954	30	48	33	26	48	45	55	0	29	66	44	48	AP006222.2	ENSG00000228463.4	4	ENST00000442116.1,ENST00000448958.1,ENST00000424587.2,ENST00000335577.4	2,3,4,2	1290,1922,2253,508	5579,8741,28888,1345	1161,901,1843,404	5579,8278,20450,1345	0,0,0,0	4,5,6,4
ENSG00000250575.1	chr1	326096	328112	+	1239	0	0	0	0	0	1	0	0	0	0	0	0	RP4-669L17.8	ENSG00000250575.1	1	ENST00000514436.1	2	1237	779	764	779	0	-1
ENSG00000233653.3	chr1	329431	332236	-	2477	0	0	0	0	0	0	0	0	0	0	0	0	CICP7	ENSG00000233653.3	1	ENST00000432723.3	2	2475	330	2286	330	0	4
ENSG00000224813.2	chr1	334126	334305	+	180	0	0	0	0	0	0	0	0	0	0	0	0	RP4-669L17.4	ENSG00000224813.2	1	ENST00000445840.1	1	179	0	179	0	0	-1
ENSG00000235249.1	chr1	367640	368634	+	995	0	0	0	0	0	0	0	0	0	0	0	0	OR4F29	ENSG00000235249.1	1	ENST00000426406.1	1	994	0	994	0	938	1
ENSG00000269732.1	chr1	379105	379467	-	363	0	0	0	0	0	0	0	0	0	0	0	0	WBP1LP7	ENSG00000269732.1	1	ENST00000437905.2	1	362	0	362	0	0	3
ENSG00000256186.1	chr1	450820	450910	-	90	0	0	0	0	0	0	0	0	0	0	0	0	AL732372.1	ENSG00000256186.1	1	ENST00000540477.1	2	88	2	56	2	0	4
ENSG00000236601.1	chr1	453633	460480	-	635	0	0	0	0	0	0	0	0	0	0	0	0	RP4-669L17.2	ENSG00000236601.1	2	ENST00000450983.1,ENST00000412666.1	2,2	605,424	6242,6214	533,339	6242,6214	0,0	4,4
ENSG00000236743.1	chr1	459656	461954	+	676	0	0	0	0	0	0	0	0	0	0	0	0	RP5-857K21.15	ENSG00000236743.1	1	ENST00000441866.1	3	673	1625	336	1162	0	-1
ENSG00000236679.2	chr1	470971	471355	+	385	0	0	0	0	0	0	0	0	0	0	0	0	RP4-669L17.1	ENSG00000236679.2	1	ENST00000458203.2	1	384	0	384	0	0	-1
ENSG00000230021.9_4	chr1	521451	763176	-	5411	9	9	18	17	11	14	17	0	12	16	9	11	RP11-206L10.17	ENSG00000230021.9_4	14	ENST00000634833.2_2,ENST00000417636.2_2,ENST00000419394.2_2,ENST00000440196.3_2,ENST00000641296.1_1,ENST00000357876.6_2,ENST00000635509.2_2,ENST00000634337.2_2,ENST00000440200.5_1,ENST00000452176.2_2,ENST00000441245.5_2,ENST00000414688.6_2,ENST00000636676.1_1,ENST00000447954.2_2	6,3,4,5,6,2,4,5,3,4,3,3,1,2	900,550,487,1017,1121,1700,937,886,410,814,626,418,182,353	25842,1625,132762,37921,35885,2543,232524,232602,118354,2959,17588,19927,0,4158	287,336,211,565,558,1252,448,448,168,446,404,195,182,206	7674,1162,116730,20863,16055,2543,115748,128711,111976,2125,16243,11817,0,4158	0,0,0,0,0,0,0,0,0,0,0,0,0,0	8,5,6,7,8,4,6,7,5,6,5,5,3,4
ENSG00000235146.2_4	chr1	523009	530148	+	635	0	0	0	0	0	0	0	0	0	0	0	0	RP5-857K21.2	ENSG00000235146.2_4	2	ENST00000423796.1_1,ENST00000450696.1_1	2,2	605,400	6534,6506	533,339	6534,6506	0,0	-1,-1
ENSG00000225972.1_3	chr1	564442	564813	+	372	2	1	3	0	3	1	5	1	1	4	1	1	RP5-857K21.9	ENSG00000225972.1_3	1	ENST00000416931.1_1	1	371	0	371	0	0	-1
ENSG00000225630.1_3	chr1	565020	566063	+	1044	2	13	5	2	3	7	9	0	0	13	9	7	RP5-857K21.8	ENSG00000225630.1_3	1	ENST00000457540.1_1	1	1043	0	1043	0	0	-1
ENSG00000237973.1_3	chr1	566454	567996	+	1543	554	579	730	241	401	343	538	2	15	763	804	714	RP5-857K21.6	ENSG00000237973.1_3	1	ENST00000414273.1_1	1	1542	0	1542	0	0	-1
ENSG00000229344.1_3	chr1	568137	568818	+	682	140	214	239	68	99	157	162	0	2	113	189	158	RP5-857K21.7	ENSG00000229344.1_3	1	ENST00000427426.1_1	1	681	0	681	0	0	-1
ENSG00000240409.1_3	chr1	568915	569121	+	207	7	5	11	4	4	2	10	0	0	7	8	6	RP5-857K21.14	ENSG00000240409.1_3	1	ENST00000467115.1_1	1	206	0	206	0	0	-1
ENSG00000248527.1_3	chr1	569076	569756	+	681	28	34	47	13	19	24	48	0	6	45	32	30	RP5-857K21.10	ENSG00000248527.1_3	1	ENST00000514057.1_1	1	680	0	680	0	0	-1
ENSG00000198744.5_3	chr1	569756	570302	+	547	684	946	778	280	570	417	506	2	2	215	879	644	RP5-857K21.11	ENSG00000198744.5_3	1	ENST00000416718.2_1	1	546	0	546	0	0	-1
ENSG00000268663.1_3	chr1	610222	610645	+	424	0	0	0	0	0	0	0	0	0	0	0	0	RP5-857K21.12	ENSG00000268663.1_3	1	ENST00000438434.2_1	1	423	0	423	0	0	-1
ENSG00000284662.1_1	chr1	621059	622053	-	995	0	0	0	0	0	0	0	0	0	0	0	0	OR4F16	ENSG00000284662.1_1	1	ENST00000332831.4_2	1	994	0	994	0	-934	1
ENSG00000229376.3_3	chr1	657472	660283	+	2455	0	0	0	0	0	0	0	0	0	1	0	1	RP11-206L10.15	ENSG00000229376.3_3	1	ENST00000440782.3_1	2	2453	358	2268	358	0	-1
ENSG00000228327.3_5	chr1	661265	714006	-	6432	163	151	240	167	217	189	274	2	70	272	230	251	RP11-206L10.2	ENSG00000228327.3_5	2	ENST00000506640.2_3,ENST00000428504.2_1	16,5	6416,412	46325,9145	3919,109	9259,5558	0,0	18,7
ENSG00000235373.1	chr1	677193	685396	-	4860	18	8	15	14	17	22	24	0	7	35	15	29	RP11-206L10.3	ENSG00000235373.1	1	ENST00000416385.1	2	4858	3345	3321	3345	0	4
ENSG00000223181.1	chr1	693613	693716	-	104	1	2	0	1	2	2	3	0	0	3	2	2	RNU6-1199P	ENSG00000223181.1	1	ENST00000411249.1	1	103	0	103	0	0	3
ENSG00000229905.1_4	chr1	696291	697369	+	456	0	0	0	0	0	0	0	0	0	0	0	0	RP11-206L10.4	ENSG00000229905.1_4	1	ENST00000422528.1_1	2	454	624	243	624	0	-1
ENSG00000237491.8_4	chr1	714150	745440	+	5517	176	185	200	154	153	145	117	0	10	209	147	136	RP11-206L10.9	ENSG00000237491.8_4	20	ENST00000434264.6_1,ENST00000457084.1_1,ENST00000589899.5_1,ENST00000609830.1_2,ENST00000429505.5_1,ENST00000585826.1_1,ENST00000592547.1_1,ENST00000586928.5_1,ENST00000585745.5_1,ENST00000585768.5_1,ENST00000590848.5_1,ENST00000591440.5_1,ENST00000587530.5_1,ENST00000593022.5_1,ENST00000589531.5_1,ENST00000588951.5_1,ENST00000586288.1_1,ENST00000591702.1_1,ENST00000443772.1_1,ENST00000412115.1_1	3,2,4,4,3,1,1,2,2,2,5,3,4,4,4,4,7,1,2,3	841,564,805,665,438,389,607,596,166,392,721,777,1020,689,710,603,1033,1872,415,578	5079,2845,4920,4827,25381,0,0,1900,10977,17114,19741,19980,19880,21400,22234,24756,21892,0,2251,4550	322,310,285,252,303,389,607,473,123,269,271,351,494,303,300,303,271,1872,248,438	2845,2845,2845,2845,24827,0,0,1900,10977,17114,8389,19426,19074,19426,19429,19426,8389,0,2251,2299	0,0,0,0,0,0,0,0,0,0,0,0,0,0,0,0,0,0,0,0	-1,-1,-1,-1,-1,-1,-1,-1,-1,-1,-1,-1,-1,-1,-1,-1,-1,-1,-1,-1
ENSG00000285268.1_1	chr1	717317	717430	+	114	29	31	44	30	21	25	16	0	0	28	29	18	RP11-206L10.18	ENSG00000285268.1_1	1	ENST00000644482.1_1	1	113	0	113	0	0	-1
ENSG00000230092.7_4	chr1	736259	753092	-	872	18	28	21	12	12	27	22	0	0	36	36	22	RP11-206L10.8	ENSG00000230092.7_4	2	ENST00000447500.4_1,ENST00000590817.3_1	5,3	867,235	15966,4127	339,94	7203,2683	0,0	7,5
ENSG00000269831.1	chr1	738532	739137	-	129	1	0	1	2	2	1	3	0	4	8	3	4	AL669831.1	ENSG00000269831.1	1	ENST00000599533.1	3	126	479	86	309	0	5
ENSG00000177757.2_2	chr1	752751	755217	+	1947	0	0	0	0	0	1	0	0	0	0	0	0	FAM87B	ENSG00000177757.2_2	1	ENST00000326734.2_1	2	1945	521	1114	521	0	-1
ENSG00000228794.8_3	chr1	760518	794826	+	9470	279	234	258	191	157	152	163	3	5	303	284	282	RP11-206L10.11	ENSG00000228794.8_3	15	ENST00000624927.3_2,ENST00000623808.3_2,ENST00000445118.6_1,ENST00000448975.6_1,ENST00000610067.5_1,ENST00000608189.4_1,ENST00000441765.5_1,ENST00000609139.5_1,ENST00000449005.5_1,ENST00000416570.5_1,ENST00000623070.3_2,ENST00000609009.5_1,ENST00000622921.1_2,ENST00000415295.1_1,ENST00000425657.1_1	3,3,5,5,5,6,3,4,6,5,4,6,3,2,2	674,490,6601,628,545,818,747,451,868,607,490,761,721,892,843	23780,24903,25237,23729,23781,23611,13324,23878,25085,24460,25332,23608,23973,9523,561	414,298,6055,170,152,170,538,173,235,183,183,173,588,820,762	22102,22823,22823,18550,18550,18550,12096,12096,18550,18550,22823,18550,22823,9523,561	0,0,0,0,0,0,0,0,0,0,0,0,0,0,0	-1,-1,-1,-1,-1,-1,-1,-1,-1,-1,-1,-1,-1,-1,-1
ENSG00000225880.5_3	chr1	761586	762902	-	1317	59	79	78	38	42	37	52	0	6	69	67	84	NCRNA00115	ENSG00000225880.5_3	1	ENST00000473798.1_1	1	1316	0	1316	0	0	3
ENSG00000230368.2_2	chr1	803451	812283	-	1971	0	2	2	0	0	0	2	0	0	3	0	1	FAM41C	ENSG00000230368.2_2	3	ENST00000446136.1_1,ENST00000432963.1_1,ENST00000427857.1_1	3,4,3	1804,500,443	7028,1461,7956	1043,290,272	5437,853,6365	0,0,0	5,6,5
ENSG00000234711.1_2	chr1	808672	809729	+	1058	0	1	0	0	0	0	0	0	0	0	0	1	TUBB8P11	ENSG00000234711.1_2	1	ENST00000415481.1_1	1	1057	0	1057	0	0	-1
ENSG00000283040.1_4	chr1	809909	812614	-	837	0	0	0	0	0	0	0	0	0	0	0	0	FAM166AP3	ENSG00000283040.1_4	1	ENST00000635557.1_1	5	832	1873	479	902	0	7
ENSG00000269308.1	chr1	818043	819983	+	57	0	1	0	0	0	0	0	0	0	0	0	0	AL645608.2	ENSG00000269308.1	1	ENST00000594233.1	3	54	1886	22	1438	54	-1
ENSG00000272438.1_5	chr1	840214	851356	+	351	0	0	0	0	0	0	0	0	0	0	2	0	RP11-54O7.16	ENSG00000272438.1_5	1	ENST00000607769.1_1	2	349	10793	226	10793	0	-1
ENSG00000230699.2_5	chr1	846815	850328	+	3043	0	0	0	0	0	0	1	0	1	1	0	0	RP11-54O7.1	ENSG00000230699.2_5	1	ENST00000448179.1_1	2	3041	472	3003	472	0	-1
ENSG00000241180.1_5	chr1	849551	850351	+	443	0	0	0	0	0	0	0	0	1	0	0	0	RP11-54O7.2	ENSG00000241180.1_5	1	ENST00000398216.2_1	2	441	359	273	359	0	-1
ENSG00000223764.2_4	chr1	852245	856396	-	4152	1	0	0	0	0	0	0	0	0	3	1	0	RP11-54O7.3	ENSG00000223764.2_4	3	ENST00000609207.1_1,ENST00000417705.1_1,ENST00000432961.1_1	1,4,2	4151,1385,628	0,1437,536	4151,850,512	0,715,536	0,0,0	3,6,4
ENSG00000187634.11_5	chr1	859308	879961	+	4166	0	6	2	1	3	1	2	0	1	14	4	2	SAMD11	ENSG00000187634.11_5	17	ENST00000420190.6_5,ENST00000437963.5_1,ENST00000342066.7_3,ENST00000617307.4_3,ENST00000618181.4_3,ENST00000622503.4_3,ENST00000618323.4_1,ENST00000616016.4_1,ENST00000618779.4_3,ENST00000616125.4_3,ENST00000620200.4_1,ENST00000341065.8_1,ENST00000455979.1_1,ENST00000478729.1_1,ENST00000474461.1_1,ENST00000466827.1_1,ENST00000464948.1_1	7,5,14,13,11,14,12,13,13,12,9,12,7,3,4,2,2	1571,382,2537,2301,2168,2543,2147,2378,2355,2218,1865,2179,1724,315,858,540,655	13792,10261,16300,16539,16672,16297,16693,16462,16485,16622,16975,12084,3260,1512,1060,159,71	1020,181,667,673,673,673,673,673,673,673,673,667,561,162,435,392,333	4683,4683,4683,4683,5436,4683,5367,4683,4683,4683,11321,4683,1684,830,830,159,71	0,0,2033,1794,1661,2036,958,1029,1848,1711,676,1757,1618,0,0,0,0	1,2,2,2,2,2,2,2,2,2,2,-1,-1,-1,-1,-1,-1
ENSG00000268179.1	chr1	861264	866445	-	336	0	0	0	0	0	0	0	0	0	0	0	0	AL645608.1	ENSG00000268179.1	1	ENST00000598827.1	6	330	4851	142	2295	0	8
ENSG00000188976.10_2	chr1	879584	894689	-	5539	2442	3059	3518	2481	2682	2547	2601	7	347	2156	3214	3203	NOC2L	ENSG00000188976.10_2	6	ENST00000483767.5_1,ENST00000327044.6_1,ENST00000477976.5_1,ENST00000496938.1_1,ENST00000487214.1_1,ENST00000469563.1_1	5,19,17,2,7,2	1606,2771,4184,147,858,876	1250,12315,10069,96,4025,134	658,596,1359,103,174,835	520,2524,2524,96,1656,134	0,0,0,0,0,0	7,19,19,4,9,4
ENSG00000187961.13_3	chr1	895967	901095	+	3395	192	192	344	241	195	215	189	0	5	246	273	283	KLHL17	ENSG00000187961.13_3	5	ENST00000338591.7_1,ENST00000622660.1_1,ENST00000463212.1_1,ENST00000466300.1_1,ENST00000481067.1_1	12,9,2,6,2	2548,1941,953,907,513	2580,3022,76,896,99	752,639,652,221,456	493,1383,76,416,99	1917,672,0,460,0	1,3,-1,-1,-1
ENSG00000187583.10_3	chr1	901877	911245	+	2833	34	16	23	19	43	38	25	0	3	88	86	61	PLEKHN1	ENSG00000187583.10_3	5	ENST00000379410.7_1,ENST00000379409.6_3,ENST00000379407.7_1,ENST00000480267.1_1,ENST00000491024.1_1	16,15,15,3,5	2388,2440,2179,461,693	6223,6066,6327,187,1660	666,566,566,199,218	3474,3474,3474,116,1124	1820,1977,1716,0,527	1,1,1,-1,-1
ENSG00000187642.9_2	chr1	910584	917473	-	3424	3	2	1	0	1	1	0	0	3	16	6	1	PERM1	ENSG00000187642.9_2	3	ENST00000341290.6_1,ENST00000479361.1_1,ENST00000433179.3_1	5,2,3	3030,1206,3337	3859,230,2487	1776,1064,2148	2257,230,2257	0,0,0	5,4,3
ENSG00000272512.1_4	chr1	931346	933431	-	2086	10	11	11	9	11	5	17	0	0	22	17	17	RP11-54O7.17	ENSG00000272512.1_4	1	ENST00000606034.1_2	1	2085	0	2085	0	0	3
ENSG00000188290.10_3	chr1	934342	935552	-	1118	133	148	134	125	85	95	165	0	38	161	151	169	HES4	ENSG00000188290.10_3	4	ENST00000428771.6_2,ENST00000304952.10_2,ENST00000481869.1_1,ENST00000484667.2_1	3,4,2,3	1037,895,1036,664	173,252,94,347	480,468,570,462	94,94,94,253	0,0,0,0	3,4,4,3
ENSG00000187608.8_4	chr1	936518	949921	+	942	261	332	228	216	349	331	265	4	41	803	299	281	ISG15	ENSG00000187608.8_4	3	ENST00000624697.3_3,ENST00000624652.1_4,ENST00000379389.4_3	3,3,2	785,654,709	12618,12636,408	557,451,556	6913,6931,408	473,0,496	3,3,1
ENSG00000231702.2_4	chr1	943456	943609	-	154	2	0	8	4	4	4	6	0	0	1	4	2	RP11-54O7.10	ENSG00000231702.2_4	1	ENST00000423619.2_1	1	153	0	153	0	0	3
ENSG00000224969.1_4	chr1	947377	948573	-	471	1	2	1	3	0	1	1	0	1	1	2	3	RP11-54O7.11	ENSG00000224969.1_4	1	ENST00000458555.1_1	2	469	727	276	727	0	4
ENSG00000188157.14_4	chr1	955503	991498	+	10758	4288	2428	3355	2331	2886	2601	3323	20	269	3546	2370	2322	AGRN	ENSG00000188157.14_4	10	ENST00000379370.6_1,ENST00000620552.4_1,ENST00000477585.1_3,ENST00000469403.1_1,ENST00000479707.1_1,ENST00000466223.1_1,ENST00000478677.1_1,ENST00000492947.1_1,ENST00000419249.2_3,ENST00000461111.1_1	36,39,3,3,4,3,2,2,9,3	7287,7355,704,896,580,456,274,688,852,3382	28706,28640,5915,5634,370,208,89,177,2590,744	1292,1294,597,457,189,253,212,530,197,1991	12815,12815,5341,5341,210,119,89,177,1445,471	6102,5755,0,0,0,0,0,0,0,0	1,2,1,-1,-1,-1,-1,-1,-1,-1
ENSG00000242590.1_5	chr1	990413	991496	+	402	375	187	244	188	221	243	293	1	17	392	181	216	RP11-54O7.14	ENSG00000242590.1_5	1	ENST00000418300.1_1	2	400	683	218	683	0	-1
ENSG00000217801.9_4	chr1	995114	1004735	+	2171	177	171	78	56	158	138	143	1	40	299	211	197	RP11-465B22.3	ENSG00000217801.9_4	6	ENST00000427998.5_1,ENST00000394517.6_1,ENST00000456409.5_1,ENST00000412397.2_1,ENST00000433695.1_1,ENST00000451054.1_1	4,3,2,10,2,2	973,394,748,1209,538,563	5749,4591,2629,5067,1241,1360	626,175,626,191,444,492	2686,2629,2629,1112,1241,1360	0,0,0,0,0,0	-1,-1,-1,-1,-1,-1
ENSG00000273443.1_4	chr1	997588	998668	-	829	7	4	1	1	9	9	1	0	1	31	13	9	RP11-54O7.18	ENSG00000273443.1_4	1	ENST00000442292.2_1	2	827	253	600	253	0	4
ENSG00000237330.2_2	chr1	1006346	1009687	-	1902	41	34	2	1	5	2	1	0	36	159	39	44	RNF223	ENSG00000237330.2_2	1	ENST00000453464.2_1	2	1900	1441	1609	1441	-745	2
ENSG00000131591.17_4	chr1	1017198	1051741	-	6322	170	164	264	191	114	107	182	1	3	222	289	322	C1orf159	ENSG00000131591.17_4	19	ENST00000379339.5_3,ENST00000465822.5_1,ENST00000379325.7_1,ENST00000421241.6_2,ENST00000487177.5_1,ENST00000477196.5_1,ENST00000467751.5_1,ENST00000464905.1_1,ENST00000379320.5_1,ENST00000379319.5_2,ENST00000434641.5_2,ENST00000482816.5_1,ENST00000462097.5_2,ENST00000473600.1_1,ENST00000475119.5_2,ENST00000442117.5_3,ENST00000427787.5_1,ENST00000472741.5_1,ENST00000480643.1_1	12,9,11,10,3,10,12,3,8,10,11,10,7,5,6,5,5,3,6	2417,1924,1999,1831,3312,3204,2087,647,2316,1087,831,972,829,788,734,549,570,658,573	31846,8330,32273,32444,2499,31060,32177,1279,7623,22340,32348,31345,28388,4365,28437,4689,1837,24383,24016	1169,1164,1164,1164,2681,1162,1162,383,752,287,134,183,296,303,301,247,247,519,221	22919,2756,23957,23957,1372,23957,23957,928,2756,13853,23957,23957,13853,2756,23957,2756,850,23957,13853	0,0,0,0,0,0,0,0,0,0,0,0,0,0,0,0,0,0,0	12,11,10,10,5,4,6,5,8,10,13,12,9,7,8,7,7,5,8
ENSG00000223823.1_3	chr1	1072397	1079436	+	1620	4	4	12	13	13	8	24	0	2	20	31	34	RP11-465B22.5	ENSG00000223823.1_3	1	ENST00000416774.1_1	3	1617	5422	1317	3715	0	-1
ENSG00000207730.1	chr1	1102484	1102578	+	95	0	1	1	1	1	1	1	0	0	0	0	1	MIR200B	ENSG00000207730.1	1	ENST00000384997.1	1	94	0	94	0	0	-1
ENSG00000207607.1	chr1	1103243	1103332	+	90	0	1	3	0	2	1	0	0	0	2	0	3	MIR200A	ENSG00000207607.1	1	ENST00000384875.1	1	89	0	89	0	0	-1
ENSG00000198976.1	chr1	1104385	1104467	+	83	2	0	3	3	6	3	4	0	1	4	3	3	MIR429	ENSG00000198976.1	1	ENST00000362106.1	1	82	0	82	0	0	-1
ENSG00000272141.1_4	chr1	1104737	1105723	+	987	10	10	10	7	13	11	17	0	0	13	16	13	RP11-465B22.8	ENSG00000272141.1_4	1	ENST00000606993.1_1	1	986	0	986	0	0	-1
ENSG00000205231.1_4	chr1	1108436	1114935	-	3532	0	0	0	0	0	0	0	0	0	0	1	0	RP11-465B22.6	ENSG00000205231.1_4	1	ENST00000379317.1_1	2	3530	2969	3340	2969	0	4
ENSG00000162571.13_3	chr1	1109264	1133315	+	3943	0	2	0	0	0	0	1	0	3	6	4	1	TTLL10	ENSG00000162571.13_3	7	ENST00000506177.1_1,ENST00000379290.5_1,ENST00000379289.5_1,ENST00000379288.3_1,ENST00000460998.1_1,ENST00000514695.1_1,ENST00000486379.1_3	2,16,16,9,5,2,5	555,2267,2243,2105,713,217,421	595,21765,21784,4062,2730,130,12018	513,497,495,895,376,153,116	595,11491,11491,881,881,130,11277	0,2009,2009,1207,0,0,135	-1,4,4,2,-1,-1,-1
ENSG00000186891.13_3	chr1	1138888	1142071	-	1370	0	1	0	0	0	0	0	0	2	27	10	8	TNFRSF18	ENSG00000186891.13_3	4	ENST00000328596.10_3,ENST00000379268.6_3,ENST00000486728.5_1,ENST00000379265.5_1	4,5,4,5	847,1174,723,700	2216,2006,1113,2027	452,457,310,186	893,893,884,893	0,0,0,0	4,5,4,5
ENSG00000186827.10_2	chr1	1146706	1149518	-	1721	1	1	0	1	0	0	0	0	0	1	3	0	TNFRSF4	ENSG00000186827.10_2	3	ENST00000379236.3_1,ENST00000497869.5_1,ENST00000453580.1_1	7,5,4	1061,1702,389	1745,1096,1090	299,793,119	570,500,500	0,0,0	7,7,6
ENSG00000078808.16_2	chr1	1152288	1167411	-	4709	3387	3446	3059	2428	3223	2727	2582	5	176	2756	3223	2951	SDF4	ENSG00000078808.16_2	7	ENST00000360001.10_1,ENST00000465727.5_1,ENST00000263741.11_1,ENST00000494748.1_1,ENST00000478938.1_1,ENST00000403997.2_1,ENST00000459994.2_1	7,7,7,3,2,5,3	1949,2088,2072,3513,2589,723,601	13144,13012,13028,906,770,9350,4095	780,873,873,2582,1835,236,478	4500,4500,4500,770,770,4500,2946	0,0,0,0,0,0,0	7,6,7,5,4,7,5
ENSG00000176022.4_3	chr1	1167645	1170421	+	2777	720	763	810	663	829	786	686	4	34	430	509	440	B3GALT6	ENSG00000176022.4_3	1	ENST00000379198.3_1	1	2776	0	2776	0	989	1
ENSG00000184163.3_2	chr1	1177826	1182102	-	1794	6	5	11	7	6	5	1	0	1	11	11	11	C1QTNF12	ENSG00000184163.3_2	5	ENST00000462849.1_1,ENST00000478606.1_1,ENST00000330388.2_1,ENST00000468365.1_1,ENST00000486627.1_1	3,2,8,3,2	679,520,1028,644,637	338,189,3241,508,106	401,323,208,321,343	189,189,2017,402,106	0,0,0,0,0	5,4,8,5,4
ENSG00000260179.1_4	chr1	1185157	1186714	-	1558	7	2	6	7	6	3	7	0	35	10	5	6	RP5-902P8.12	ENSG00000260179.1_4	1	ENST00000565563.1_1	1	1557	0	1557	0	0	3
ENSG00000160087.20_3	chr1	1189289	1209265	-	4712	667	755	1074	821	838	764	877	1	27	525	782	753	UBE2J2	ENSG00000160087.20_3	20	ENST00000450390.6_1,ENST00000347370.6_1,ENST00000349431.10_1,ENST00000400929.6_1,ENST00000464036.5_1,ENST00000360466.6_1,ENST00000400930.8_1,ENST00000467339.1_1,ENST00000473215.5_1,ENST00000435198.5_1,ENST00000509720.5_1,ENST00000491779.5_1,ENST00000466752.5_1,ENST00000503294.5_1,ENST00000477894.5_1,ENST00000471154.1_1,ENST00000422076.5_1,ENST00000502382.1_2,ENST00000461142.3_1,ENST00000488418.2_1	8,7,7,6,8,7,8,2,7,7,5,4,6,6,6,3,5,5,3,2	2447,2380,1726,1051,1248,1040,1013,513,1021,1049,467,607,880,808,761,333,638,525,834,748	17497,17560,17689,17819,17568,17522,17642,558,17560,17400,17921,17134,15943,16014,16044,6114,15972,16059,10150,4861	1578,1573,1017,502,439,323,309,290,259,467,161,291,259,259,220,223,338,188,533,618	6036,6036,6036,10280,5674,6036,6036,558,6036,6036,10280,16189,6036,5674,5674,6036,6036,6036,5674,4861	-127,0,0,0,0,0,0,0,-130,0,0,0,-130,-130,0,0,0,0,0,0	2,7,7,6,5,7,8,4,2,9,7,6,2,2,4,5,7,7,5,4
ENSG00000230415.1_3	chr1	1210603	1215800	+	513	6	4	19	14	8	6	24	0	3	4	6	9	RP5-902P8.10	ENSG00000230415.1_3	2	ENST00000434139.1_1,ENST00000453732.1_1	3,2	265,387	4932,3769	109,325	3769,3769	0,0	-1,-1
ENSG00000162572.20_2	chr1	1215816	1227409	+	4025	27	25	56	29	42	38	94	0	1	56	74	63	SCNN1D	ENSG00000162572.20_2	8	ENST00000379116.9_1,ENST00000379101.8_1,ENST00000338555.6_1,ENST00000400928.7_1,ENST00000470022.1_1,ENST00000325425.12_1,ENST00000467651.2_1,ENST00000379099.3_1	18,17,15,16,4,15,4,7	3026,2251,3460,2715,641,2664,200,916	8557,8650,7976,8090,3602,7251,3233,2918	765,352,1022,775,242,770,112,328	2234,2234,2234,2234,1836,2234,1663,2234	2391,980,1904,1904,0,2100,0,0	1,1,3,4,2,1,-1,-1
ENSG00000131584.18_2	chr1	1227756	1244989	-	8809	1043	962	1297	935	1008	924	1441	4	79	1075	1197	1210	ACAP3	ENSG00000131584.18_2	13	ENST00000354700.9_1,ENST00000492936.5_1,ENST00000467278.5_1,ENST00000353662.4_1,ENST00000470659.1_1,ENST00000379037.6_1,ENST00000476572.1_1,ENST00000493992.1_1,ENST00000472541.5_1,ENST00000354980.7_1,ENST00000478065.5_1,ENST00000479108.5_1,ENST00000438966.1_1	24,22,14,21,2,4,6,2,9,8,3,5,4	3872,5297,2711,2259,419,488,813,324,1937,574,2390,480,261	11770,8242,3374,7437,90,1341,2338,80,8928,7051,1063,5494,4347	1332,1843,838,226,290,197,272,228,1161,183,1739,190,84	3626,1296,1189,1296,90,1189,1189,80,5299,3194,876,3626,2929	0,0,0,0,0,0,0,0,0,0,0,0,0	24,24,16,21,4,6,8,4,11,4,5,7,6
ENSG00000169972.11_2	chr1	1243947	1247057	+	2489	376	420	486	439	419	387	389	0	12	260	324	304	PUSL1	ENSG00000169972.11_2	5	ENST00000379031.9_1,ENST00000470520.5_1,ENST00000463758.1_1,ENST00000467712.1_1,ENST00000493657.1_1	8,6,2,6,4	1279,763,938,871,1779	1831,1654,114,1377,662	347,187,754,187,1035	783,783,114,783,259	904,0,0,0,0	1,-1,-1,4,-1
ENSG00000127054.20_3	chr1	1246965	1260071	-	8220	1116	1011	1734	1393	1182	1189	1354	4	332	1035	1661	1594	INTS11	ENSG00000127054.20_3	50	ENST00000470030.6_1,ENST00000540437.5_1,ENST00000545578.5_1,ENST00000620829.4_1,ENST00000618806.4_1,ENST00000435064.5_1,ENST00000497304.6_1,ENST00000323275.10_1,ENST00000411962.5_1,ENST00000462432.5_1,ENST00000478641.5_1,ENST00000421495.6_1,ENST00000458452.7_1,ENST00000419704.5_1,ENST00000532772.5_1,ENST00000450926.6_1,ENST00000527098.5_1,ENST00000485710.5_1,ENST00000461514.6_1,ENST00000525164.5_…	10,19,18,15,12,17,3,16,15,13,6,14,19,15,13,17,18,7,4,5,14,6,7,7,4,5,7,2,4,7,7,5,9,8,8,3,2,3,4,3,2,4,4,4,4,4,6,4,4,2	2359,2610,2245,1847,1511,2131,929,2434,1817,2850,3073,1854,2552,1783,1605,1822,1986,876,909,811,1510,689,809,661,700,634,1049,546,401,1127,652,574,840,742,792,588,549,735,1100,1586,2426,892,481,769,700,545,548,580,575,593	1489,10492,10857,11255,11591,10963,173,10587,11255,2998,491,11177,10492,11264,11396,11029,10857,869,611,689,10854,775,5750,2008,905,1421,9836,459,983,9089,9180,9259,8907,9013,8949,9045,8963,4610,4887,4420,3488,4706,4884,4526,4568,4734,4709,4553,3560,1294	609,395,339,339,339,327,474,637,323,1293,1438,373,395,318,297,228,228,275,689,531,228,356,189,189,363,197,452,317,177,549,137,228,228,228,228,434,472,449,845,843,2396,645,218,538,462,226,121,235,395,516	459,3678,3678,7563,5018,3678,94,3678,7563,539,140,8963,3678,5378,6034,3744,3678,385,385,385,3678,385,3678,558,385,459,4110,459,459,3678,3678,5057,3678,3678,3678,8963,8963,3678,3488,3488,3488,3488,3485,3488,3488,3488,1294,3488,1799,1294	0,0,0,0,0,0,0,0,0,0,0,0,0,0,0,0,0,0,0,0,0,0,649,561,0,0,0,0,0,0,0,0,0,0,0,0,0,0,0,0,0,0,0,0,0,0,0,419,385,0	12,19,18,15,12,17,5,18,15,15,8,14,2,15,3,17,4,9,6,7,8,8,3,2,6,7,9,4,6,9,4,7,4,10,10,5,4,5,4,5,4,6,6,6,6,3,8,3,2,4
ENSG00000240731.1_5	chr1	1252961	1254069	-	386	15	19	29	20	33	27	38	0	12	34	43	33	RP5-890O3.9	ENSG00000240731.1_5	1	ENST00000444968.1_1	2	384	724	318	724	0	4
ENSG00000224051.6_2	chr1	1260136	1264277	+	2556	308	323	408	337	273	225	178	1	5	215	404	427	CPTP	ENSG00000224051.6_2	3	ENST00000464957.1_1,ENST00000343938.8_1,ENST00000488011.1_1	2,3,3	1099,2187,780	2139,1943,1450	753,1656,354	2139,1734,1241	0,643,0	-1,2,2
ENSG00000169962.4_2	chr1	1266694	1270686	+	3433	10	16	4	4	12	8	29	0	1	30	12	9	TAS1R3	ENSG00000169962.4_2	1	ENST00000339381.5_1	6	3427	565	1800	135	2553	1
ENSG00000107404.19_4	chr1	1270656	1284730	-	3814	1435	1530	2142	1938	1975	2079	1838	6	43	1415	1873	1844	DVL1	ENSG00000107404.19_4	8	ENST00000378891.9_3,ENST00000378888.9_4,ENST00000610709.2_1,ENST00000632445.1_2,ENST00000631679.1_1,ENST00000634054.1_1,ENST00000633096.1_1,ENST00000472445.1_1	15,15,9,6,8,5,3,4	2911,3224,2259,779,770,823,577,635	10925,10850,11597,2231,2259,1033,296,6550	1239,1239,1236,206,206,362,320,386	6138,6138,6138,922,922,634,226,6138	0,0,0,132,24,0,0,0	15,15,9,5,8,7,5,6
ENSG00000162576.16_2	chr1	1288069	1297157	-	3622	1404	1130	642	539	841	804	1337	3	68	1879	1724	1721	MXRA8	ENSG00000162576.16_2	10	ENST00000474033.5_1,ENST00000342753.8_1,ENST00000309212.10_1,ENST00000445648.5_1,ENST00000477278.3_1,ENST00000473097.5_1,ENST00000478517.5_1,ENST00000476718.1_1,ENST00000464351.1_1,ENST00000460473.1_1	4,9,10,10,10,4,3,5,2,2	1167,2222,2263,1991,2718,971,843,996,403,337	408,3883,3581,3860,6367,311,189,581,105,92	940,940,938,640,937,736,713,334,341,268	219,1752,1752,1752,4538,122,102,219,105,92	0,0,0,0,0,0,0,0,0,0	6,9,10,10,10,6,5,7,4,4
ENSG00000175756.13_2	chr1	1309110	1310875	-	1669	1003	1256	1537	1335	1338	1268	1357	6	48	656	1092	1062	AURKAIP1	ENSG00000175756.13_2	6	ENST00000338370.7_1,ENST00000338338.9_1,ENST00000321751.9_1,ENST00000378853.3_1,ENST00000489799.1_1,ENST00000496905.1_1	3,4,4,4,2,2	1069,1043,794,871,693,606	358,722,643,565,207,115	452,445,445,445,546,454	260,364,285,260,207,115	0,0,0,0,0,0	3,4,4,4,4,4
ENSG00000223663.2_4	chr1	1314046	1314412	+	367	1	0	0	0	0	0	0	0	0	0	0	0	RP5-890O3.3	ENSG00000223663.2_4	1	ENST00000435351.2_1	1	366	0	366	0	0	-1
ENSG00000221978.11_2	chr1	1321091	1334708	-	6850	3741	3153	4182	2959	3398	3465	4351	11	100	3279	3688	3545	CCNL2	ENSG00000221978.11_2	20	ENST00000480479.5_1,ENST00000482621.5_1,ENST00000463260.5_1,ENST00000400809.7_1,ENST00000496007.5_1,ENST00000482365.5_1,ENST00000408952.8_1,ENST00000481223.6_1,ENST00000418865.6_1,ENST00000505849.5_1,ENST00000488340.5_1,ENST00000492998.5_1,ENST00000469113.5_1,ENST00000480646.1_1,ENST00000471930.5_1,ENST00000408918.8_1,ENST00000473872.5_1,ENST00000425598.2_1,ENST00000463895.1_1,ENST00000497013.1_1	8,10,3,11,13,7,10,12,6,9,12,7,6,4,5,6,3,5,2,3	2784,2049,1938,2294,4439,2613,1847,2803,3076,1494,1586,738,701,610,841,1180,554,656,383,545	2601,9773,280,10523,8371,2639,2593,9800,2736,3033,10510,2619,3992,1048,6372,5849,4653,5225,2719,2974	1871,1100,1087,1087,2037,1080,1079,874,1759,460,350,141,278,238,400,515,380,337,329,359	1487,2696,195,2719,2719,1183,1400,2719,2165,1487,2719,1487,2165,757,2719,2719,2719,2719,2719,2719	0,1914,0,0,0,0,0,0,0,0,0,0,0,0,0,0,0,0,0,0	10,2,5,11,15,9,10,7,8,11,7,9,8,6,7,6,5,4,4,5
ENSG00000224870.6_4	chr1	1334902	1337426	+	2525	507	556	632	520	425	384	595	0	3	526	673	658	RP4-758J18.2	ENSG00000224870.6_4	8	ENST00000448629.5_1,ENST00000444362.2_1,ENST00000418833.2_1,ENST00000576232.1_1,ENST00000570344.1_1,ENST00000447725.2_1,ENST00000572242.1_1,ENST00000453521.1_1	3,3,2,2,2,3,1,2	794,1744,2194,583,513,1840,2227,856	771,775,302,473,469,594,0,771	482,1441,1421,450,386,1401,2227,803	469,473,302,473,469,302,0,771	0,0,0,0,0,0,0,0	-1,-1,-1,-1,-1,-1,-1,-1
ENSG00000242485.5_2	chr1	1337288	1342693	-	2788	917	1240	1324	1093	1029	931	1038	0	307	679	991	979	MRPL20	ENSG00000242485.5_2	6	ENST00000344843.11_1,ENST00000493287.5_1,ENST00000487659.1_1,ENST00000492508.1_1,ENST00000482352.1_1,ENST00000477686.1_1	4,3,3,3,3,3	717,501,1690,585,1046,311	4688,3893,3665,4231,1135,675	348,343,1210,419,777,110	3553,3553,3553,3208,1023,563	0,0,0,389,0,0	4,5,5,3,3,5
ENSG00000264293.1	chr1	1340841	1341132	-	292	39	33	58	28	42	34	34	0	0	29	47	38	RN7SL657P	ENSG00000264293.1	1	ENST00000582431.1	1	291	0	291	0	0	3
ENSG00000272455.1_4	chr1	1344476	1345998	+	1523	157	147	153	140	119	103	149	0	75	97	116	132	RP4-758J18.13	ENSG00000272455.1_4	1	ENST00000607307.1_1	1	1522	0	1522	0	0	-1
ENSG00000235098.8_3	chr1	1353800	1357149	-	2644	410	369	548	416	457	412	827	0	58	629	741	789	ANKRD65	ENSG00000235098.8_3	5	ENST00000520296.5_1,ENST00000427211.3_1,ENST00000537107.5_2,ENST00000454272.2_1,ENST00000442470.1_1	3,3,4,3,2	1629,1973,2186,1503,874	1395,1376,836,708,1248	1129,1129,1127,669,463	1267,1248,503,503,1248	0,0,0,0,0	3,3,4,3,2
ENSG00000225905.1_4	chr1	1355625	1358071	+	543	9	5	8	10	3	4	14	0	0	7	10	14	RP4-758J18.7	ENSG00000225905.1_4	1	ENST00000428932.1_1	2	541	1905	319	1905	0	-1
ENSG00000205116.3_2	chr1	1361508	1363167	+	492	9	19	9	6	12	9	20	0	5	16	11	14	TMEM88B	ENSG00000205116.3_2	1	ENST00000378821.3_1	2	490	1169	257	1169	490	1
ENSG00000225285.1_3	chr1	1365919	1369953	-	851	51	48	38	40	23	21	51	0	3	45	60	60	RP4-758J18.10	ENSG00000225285.1_3	4	ENST00000430109.1_1,ENST00000434150.1_1,ENST00000454562.1_1,ENST00000417917.1_1	2,2,2,2	508,442,422,632	3526,851,3516,3224	385,404,310,342	3526,851,3516,3224	0,0,0,0	4,4,4,4
ENSG00000179403.11_3	chr1	1370241	1378262	+	5065	3140	3170	2154	1969	1998	1892	2100	6	106	1866	2036	1871	VWA1	ENSG00000179403.11_3	4	ENST00000495558.1_2,ENST00000338660.5_1,ENST00000476993.1_1,ENST00000471398.1_1	2,3,3,2	817,2144,4508,456	1781,3098,2703,986	532,1684,3801,370	1781,1597,1597,986	0,193,1335,0	2,1,1,1
ENSG00000215915.9_3	chr1	1385069	1405538	+	3976	79	86	58	53	93	108	78	0	16	73	119	132	ATAD3C	ENSG00000215915.9_3	3	ENST00000378785.6_1,ENST00000475091.2_2,ENST00000484537.2_1	12,6,2	3847,519,504	16622,5469,5676	1774,127,279	5676,3026,5676	1224,0,0	1,2,-1
ENSG00000160072.19_2	chr1	1407149	1433228	+	7682	954	953	1522	1211	1046	1094	969	3	225	622	862	787	ATAD3B	ENSG00000160072.19_2	5	ENST00000308647.7_1,ENST00000472194.6_1,ENST00000378736.3_1,ENST00000485748.5_1,ENST00000474481.1_1	16,14,4,10,5	2432,4300,410,3223,3362	22001,15522,3203,9494,8270	717,2363,165,1686,1467	5185,4814,1759,4814,4814	1931,0,0,0,0	1,-1,-1,-1,-1
ENSG00000284740.1_1	chr1	1438630	1444832	+	660	1	3	5	1	3	1	0	0	0	6	1	0	RP5-832C2.8	ENSG00000284740.1_1	2	ENST00000641974.1_1,ENST00000641679.1_1	2,2	658,225	5544,5544	411,146	5544,5544	0,0	-1,-1
ENSG00000197785.13_3	chr1	1447531	1470067	+	3069	828	992	1283	1090	986	961	987	3	16	585	888	707	ATAD3A	ENSG00000197785.13_3	7	ENST00000378756.7_2,ENST00000378755.9_2,ENST00000339113.8_1,ENST00000536055.5_2,ENST00000439513.1_1,ENST00000429957.1_1,ENST00000400830.3_1	16,16,16,16,2,5,6	2476,2596,2314,2316,401,493,597	20058,19914,19841,19841,304,4666,4461	759,759,759,761,342,165,167	4595,4595,4595,4595,304,2127,1361	1745,1889,1701,1509,0,0,0	1,1,-1,2,-1,-1,-1
ENSG00000205090.8_2	chr1	1470554	1475833	-	1380	9	2	3	2	4	3	3	0	0	4	4	6	TMEM240	ENSG00000205090.8_2	3	ENST00000378733.8_1,ENST00000425828.1_1,ENST00000624426.1_1	4,5,2	714,712,794	4469,4534,500	333,300,734	3887,3887,500	0,0,0	4,5,2
ENSG00000160075.11_2	chr1	1477053	1510249	-	6925	2044	2496	2838	2102	1980	1677	1993	4	872	1801	2511	2524	SSU72	ENSG00000160075.11_2	4	ENST00000291386.3_1,ENST00000378726.1_1,ENST00000378725.3_1,ENST00000359060.5_1	5,3,3,2	1285,2235,616,4174	31911,2578,29333,9562	494,1624,364,4068	19771,1702,19771,9562	0,0,0,0	5,5,5,2
ENSG00000215791.2	chr1	1497726	1499904	-	2178	670	673	1004	795	721	590	633	1	362	573	969	946	AL645728.2	ENSG00000215791.2	1	ENST00000539195.1	2	2176	2	1209	2	0	4
ENSG00000215014.4_5	chr1	1510355	1512455	+	2101	30	29	23	27	18	20	24	0	1	24	24	23	RP5-832C2.5	ENSG00000215014.4_5	1	ENST00000366221.3_2	1	2100	0	2100	0	0	-1
ENSG00000236684.1	chr1	1515136	1515379	+	243	0	0	0	0	0	0	0	0	0	0	0	0	AL645728.3	ENSG00000236684.1	1	ENST00000426195.1	2	241	2	176	2	0	-1
ENSG00000274481.1_4	chr1	1518890	1519289	-	400	0	0	0	0	0	0	0	0	0	0	0	0	RP11-345P4.11	ENSG00000274481.1_4	1	ENST00000621860.1_1	1	399	0	399	0	0	3
ENSG00000228594.3_4	chr1	1533392	1535476	-	2085	91	116	165	88	77	47	117	0	6	127	96	81	C1orf233	ENSG00000228594.3_4	1	ENST00000422725.3_1	1	2084	0	2084	0	-676	1
ENSG00000272106.1_4	chr1	1549138	1551175	-	2038	211	220	176	177	124	136	110	0	58	167	187	220	RP11-345P4.9	ENSG00000272106.1_4	1	ENST00000607222.1_2	1	2037	0	2037	0	0	3
ENSG00000197530.12_4	chr1	1550795	1565990	+	8767	451	476	654	519	347	368	515	1	46	774	622	561	MIB2	ENSG00000197530.12_4	32	ENST00000520777.5_1,ENST00000355826.9_1,ENST00000518681.5_1,ENST00000505820.6_1,ENST00000479659.5_1,ENST00000489635.5_1,ENST00000511502.5_1,ENST00000477990.1_1,ENST00000514363.1_1,ENST00000487053.5_1,ENST00000502470.5_1,ENST00000378712.5_1,ENST00000507082.1_1,ENST00000463492.1_1,ENST00000510793.5_3,ENST00000504599.5_2,ENST00000507229.5_1,ENST00000503789.5_1,ENST00000378708.5_1,ENST00000506488.5_1…	20,20,19,20,19,20,19,2,6,21,5,18,2,3,4,19,14,4,18,17,3,2,16,4,2,3,3,5,5,5,3,2	3301,3270,3097,3285,4228,3014,3307,2819,586,3231,775,2872,1576,483,885,3292,2568,572,2994,2980,595,553,2546,772,575,565,806,1327,963,1053,581,544	11889,11919,12071,11877,10922,12094,11783,875,8924,11494,8170,11827,408,872,7742,11002,10284,6841,10050,9975,1142,75,4256,283,101,797,164,765,785,1047,916,588	313,318,313,313,1208,312,380,2702,171,312,248,312,1390,245,340,312,449,268,312,370,360,435,312,253,477,387,534,380,307,297,311,313	6775,6817,6775,6775,6817,6775,6775,875,6817,6775,6817,6817,408,464,6817,6775,6775,5916,5716,5716,850,75,1184,118,101,714,89,411,411,588,588,588	3181,3151,2999,3193,0,382,0,0,340,2434,253,2246,0,0,0,2892,0,0,2743,1181,0,0,2472,0,0,172,0,0,0,994,0,0	1,1,1,1,-1,1,-1,-1,1,3,3,3,-1,-1,2,2,-1,2,2,2,-1,-1,-1,-1,-1,-1,-1,-1,-1,-1,-1,-1
ENSG00000189409.13_4	chr1	1567474	1570639	+	2273	0	2	3	1	3	1	1	0	1	12	3	3	MMP23B	ENSG00000189409.13_4	10	ENST00000356026.9_1,ENST00000472264.1_1,ENST00000512731.5_1,ENST00000378675.7_1,ENST00000479814.5_1,ENST00000435358.5_1,ENST00000503792.1_2,ENST00000489782.1_1,ENST00000486400.1_1,ENST00000490017.1_1	8,3,6,7,6,4,5,4,2,3	1318,553,1525,1302,897,746,794,622,483,527	1238,404,768,1170,968,616,568,300,120,493	279,211,911,374,200,351,277,233,326,335	409,336,409,409,393,393,268,120,120,373	1165,0,713,1154,792,724,772,0,0,262	1,1,1,1,-1,-1,-1,-1,-1,-1
ENSG00000248333.8_3	chr1	1570603	1590473	-	3207	336	372	407	223	374	258	310	1	26	250	447	480	CDK11B	ENSG00000248333.8_3	9	ENST00000341832.10_3,ENST00000407249.7_3,ENST00000615951.4_1,ENST00000340677.9_3,ENST00000611150.3_1,ENST00000629289.2_3,ENST00000626918.2_3,ENST00000629312.2_3,ENST00000341028.8_1	20,18,16,19,17,22,21,22,7	2697,2392,1944,2248,2066,2468,2436,2474,607	17173,17132,17429,17125,17307,16905,16937,16899,12693	315,269,189,189,189,189,189,189,123	6200,6200,9461,6200,8954,5284,5319,5414,8954	0,0,0,0,0,0,0,0,0	18,18,5,19,6,22,21,22,9
ENSG00000272004.1_4	chr1	1590786	1594063	+	400	9	9	9	4	11	2	3	0	0	8	6	3	RP11-345P4.10	ENSG00000272004.1_4	1	ENST00000607013.1_2	2	398	2879	271	2879	0	-1
ENSG00000189339.11_2	chr1	1590990	1624167	-	8360	1176	1003	1390	966	1199	1070	1068	4	308	1688	1651	1616	SLC35E2B	ENSG00000189339.11_2	5	ENST00000614300.4_1,ENST00000617444.4_1,ENST00000611123.1_1,ENST00000480991.1_1,ENST00000481276.1_1	7,13,12,4,5	2149,6235,5901,2844,2194	31024,24909,25326,3513,20090	582,1590,1590,1590,1204	14130,14130,15603,2308,15603	0,0,0,0,0	7,10,9,6,7
ENSG00000269737.2_5	chr1	1603429	1605836	+	1819	0	1	0	0	0	0	0	0	1	1	0	0	RP11-345P4.6	ENSG00000269737.2_5	2	ENST00000596308.1_1,ENST00000597891.1_1	1,2	1421,500	0,622	1421,396	0,622	0,0	-1,-1
ENSG00000215914.4_2	chr1	1631381	1633221	+	1017	0	1	0	0	1	0	0	0	0	1	2	2	MMP23A	ENSG00000215914.4_2	1	ENST00000234610.5_1	7	1010	830	174	393	0	-1
ENSG00000008128.22_4	chr1	1634169	1655763	-	4701	359	402	463	235	397	245	347	0	7	316	491	522	CDK11A	ENSG00000008128.22_4	23	ENST00000356200.7_2,ENST00000463652.5_1,ENST00000356937.7_1,ENST00000378638.6_2,ENST00000509982.5_1,ENST00000404249.7_1,ENST00000460465.5_1,ENST00000357760.6_3,ENST00000358779.9_2,ENST00000378633.5_3,ENST00000478901.1_1,ENST00000468397.1_1,ENST00000491311.1_1,ENST00000495016.5_1,ENST00000468800.5_1,ENST00000464748.1_1,ENST00000489300.1_1,ENST00000492390.5_1,ENST00000474916.1_1,ENST00000479362.1_3…	19,5,17,20,19,20,20,20,20,20,2,4,4,3,5,3,2,5,4,5,2,2,2	2634,1023,2258,2409,2287,2429,2313,2426,2399,2438,929,832,622,283,892,378,575,971,748,695,572,435,448	17467,464,16516,17541,17664,19014,19130,19017,19044,19005,99,635,376,434,2620,283,206,3555,2875,6987,2141,1118,1118	269,464,305,189,189,189,189,189,189,189,852,332,379,127,432,210,474,675,417,232,289,365,325	3946,207,3919,3946,3946,3946,3946,3919,3946,3946,99,228,200,228,1677,206,206,1793,1677,2880,2141,1118,1118	0,0,0,0,0,0,0,0,0,0,0,0,0,0,0,0,0,0,0,0,0,0,0	19,7,19,20,12,20,13,20,20,20,4,6,6,5,7,5,4,7,6,7,4,4,4
ENSG00000268575.1_5	chr1	1634175	1669127	-	5079	455	434	526	280	480	295	436	0	107	447	597	649	RP1-283E3.8	ENSG00000268575.1_5	1	ENST00000598846.1_1	20	5059	29893	2484	11859	0	22
ENSG00000227775.3_4	chr1	1655951	1668690	+	2759	2	4	3	3	3	0	0	0	3	2	2	2	RP1-283E3.4	ENSG00000227775.3_4	4	ENST00000577672.1_1,ENST00000417099.1_1,ENST00000424604.1_1,ENST00000418950.2_1	2,2,2,2	407,1806,448,495	11054,5483,2973,939	251,1658,290,397	11054,5483,2973,939	0,0,0,0	-1,-1,-1,-1
ENSG00000215790.7_4	chr1	1656277	1677438	-	7713	399	311	461	301	384	331	388	1	461	531	505	506	SLC35E2	ENSG00000215790.7_4	6	ENST00000647043.1_1,ENST00000355439.7_2,ENST00000643905.1_1,ENST00000475229.2_1,ENST00000246421.4_2,ENST00000643943.1_1	7,7,6,3,6,4	2071,2149,6287,1256,1424,728	19010,19010,12326,2536,12326,4139	584,582,5137,695,468,321	9268,9268,6020,2167,6020,3486	0,0,0,0,0,0	9,7,6,5,8,6
ENSG00000008130.15_2	chr1	1682671	1711896	-	5570	1364	1403	2039	1560	1954	1827	2113	3	50	1392	1855	1951	NADK	ENSG00000008130.15_2	17	ENST00000341426.9_1,ENST00000341991.7_1,ENST00000378625.5_1,ENST00000342348.9_1,ENST00000498806.1_1,ENST00000469045.5_1,ENST00000480499.5_1,ENST00000497747.5_1,ENST00000477235.5_1,ENST00000489538.1_1,ENST00000497615.1_1,ENST00000497186.5_1,ENST00000492845.6_1,ENST00000492768.5_1,ENST00000460602.5_1,ENST00000464373.1_1,ENST00000480542.1_1	12,12,14,10,3,8,4,3,6,5,2,7,6,5,4,3,3	3223,3086,3639,1712,266,882,545,464,998,470,532,676,931,854,970,719,338	24015,24472,25198,4392,1142,2325,1619,237,1855,1957,161,2209,23027,20977,20678,16036,962	1828,1828,1828,589,99,154,220,322,521,154,352,154,339,294,539,370,175	12843,13300,14459,1055,635,782,782,161,782,1560,161,782,14459,12843,12843,12843,709	0,0,0,0,153,753,0,0,0,250,0,587,0,0,0,0,0	12,12,14,10,2,2,6,5,8,3,4,2,8,7,6,5,5
ENSG00000078369.17_2	chr1	1716724	1822556	-	6417	5292	7141	6710	5196	4799	4339	4836	14	146	4572	5159	5401	GNB1	ENSG00000078369.17_2	10	ENST00000610897.4_1,ENST00000615252.4_1,ENST00000378609.8_1,ENST00000461893.5_1,ENST00000471354.1_1,ENST00000439272.6_1,ENST00000434686.6_1,ENST00000437146.1_1,ENST00000607589.1_1,ENST00000472614.2_1	11,10,12,3,7,8,9,6,1,3	3134,3038,3120,2435,1505,594,675,417,566,705	102698,102794,102650,3775,27820,99677,96481,27342,0,65273	1768,1768,1767,1282,699,162,162,106,566,511	65321,51582,51582,2649,11108,51582,50682,9218,0,51582	0,0,0,0,0,0,0,0,0,0	10,9,11,5,9,10,11,8,3,5
ENSG00000231050.1_4	chr1	1822910	1824097	+	906	16	12	10	18	9	2	12	0	2	11	15	25	RP1-140A9.1	ENSG00000231050.1_4	1	ENST00000412228.1_1	2	904	283	524	283	0	-1
ENSG00000169885.9_2	chr1	1846266	1848735	+	2321	3	1	2	1	1	2	1	0	2	2	3	6	CALML6	ENSG00000169885.9_2	4	ENST00000307786.7_2,ENST00000378604.3_2,ENST00000482402.1_1,ENST00000462293.1_1	6,5,3,3	1095,764,1879,567	1372,1422,151,1095	480,199,1630,326	706,1134,78,1017	540,490,0,0	1,1,-1,-1
ENSG00000178821.12_3	chr1	1849029	1850712	-	1594	163	190	171	130	126	122	269	0	2	106	189	198	TMEM52	ENSG00000178821.12_3	6	ENST00000378602.3_1,ENST00000310991.7_1,ENST00000378598.4_2,ENST00000470931.2_1,ENST00000602604.1_1,ENST00000416272.1_2	2,5,3,4,4,3	1116,924,480,686,874,310	91,758,933,647,296,573	572,571,226,225,681,224	91,462,822,462,111,462	0,0,110,0,0,0	2,5,3,2,6,5
ENSG00000142609.18_4	chr1	1853390	1935276	-	10422	21	25	27	23	17	10	22	0	9	65	64	56	CFAP74	ENSG00000142609.18_4	10	ENST00000642590.1_1,ENST00000493964.5_4,ENST00000464311.5_1,ENST00000412120.2_1,ENST00000493316.5_1,ENST00000270720.11_1,ENST00000468610.5_1,ENST00000461752.3_1,ENST00000378592.1_1,ENST00000378590.4_4	25,38,10,11,5,18,19,4,7,4	3451,5209,2746,1961,545,4692,2566,536,2138,437	34572,76677,3226,3359,13213,45832,46000,3861,18028,2530	437,437,1277,509,159,2537,375,164,1441,171	8637,12726,1263,1263,8637,12726,12726,2336,12726,1917	338,0,0,0,0,0,0,0,0,164	25,38,12,13,7,20,21,6,9,4
ENSG00000233542.1_4	chr1	1944652	1946969	-	1954	0	0	0	0	0	0	0	0	3	3	0	0	RP11-547D24.1	ENSG00000233542.1_4	1	ENST00000443930.1_1	2	1952	365	1787	365	0	4
ENSG00000187730.8_2	chr1	1950737	1962197	+	5556	0	0	0	0	0	1	0	0	1	2	0	4	GABRD	ENSG00000187730.8_2	19	ENST00000378585.6_2,ENST00000638411.1_1,ENST00000639045.1_1,ENST00000640067.1_1,ENST00000638604.1_1,ENST00000638771.1_1,ENST00000639935.1_1,ENST00000640949.1_1,ENST00000640030.1_1,ENST00000640423.1_1,ENST00000639625.1_1,ENST00000639777.1_1,ENST00000640981.1_1,ENST00000638763.1_1,ENST00000639070.1_1,ENST00000640892.1_1,ENST00000640317.1_1,ENST00000638804.1_1,ENST00000640688.1_1	9,9,10,9,8,8,4,9,8,9,1,8,6,4,5,4,4,5,3	1952,1273,1237,1623,2369,1699,557,1675,1570,1163,662,2385,954,500,2166,2032,1574,518,1292	9508,9477,9415,9424,9012,9287,5848,9577,9663,6608,0,4057,3414,3159,1821,1365,1325,1861,506	775,220,220,424,758,814,274,673,734,220,662,784,297,212,1131,1397,1039,171,734	5451,5451,4306,5451,5451,5451,5451,5451,5451,2551,0,1839,1839,1839,819,819,819,819,285	1350,0,106,1434,0,1495,0,1281,1135,0,0,0,0,0,0,0,0,502,0	1,1,1,1,-1,1,-1,1,-1,-1,-1,-1,-1,-1,-1,-1,-1,-1,-1
ENSG00000226969.1_4	chr1	1980642	1981509	-	538	10	7	1	5	4	2	5	0	0	5	6	3	RP11-547D24.3	ENSG00000226969.1_4	2	ENST00000445600.1_1,ENST00000449154.1_1	2,3	318,434	130,332	265,202	130,202	0,0	4,5
ENSG00000067606.16_3	chr1	1981909	2116834	+	7636	935	1026	1001	819	1044	1005	1284	1	211	961	1046	1115	PRKCZ	ENSG00000067606.16_3	26	ENST00000378567.7_1,ENST00000468310.5_1,ENST00000484419.1_1,ENST00000503297.1_2,ENST00000479566.5_1,ENST00000466651.5_1,ENST00000400921.6_1,ENST00000495347.5_3,ENST00000461106.6_1,ENST00000461465.5_1,ENST00000470596.5_1,ENST00000496325.5_1,ENST00000481140.5_1,ENST00000482686.5_2,ENST00000486681.5_3,ENST00000470986.5_3,ENST00000470511.5_3,ENST00000471018.6_1,ENST00000466352.5_3,ENST00000497183.5_3…	18,6,2,4,4,4,15,5,15,6,6,6,6,6,8,6,6,5,4,7,4,13,5,14,8,6	2308,684,517,464,497,421,2279,693,1901,474,782,557,707,608,958,700,561,711,560,756,343,1734,1208,1528,1851,596	132617,94939,4740,8319,15598,79247,109649,71674,109303,75674,75308,75062,67981,45546,50390,38624,34131,14575,10725,15233,15260,39210,10163,38201,14694,4380	473,216,319,204,237,197,468,210,289,131,278,135,212,179,188,188,131,362,273,189,131,473,733,194,756,142	75671,75671,4740,4429,11708,75671,61333,36707,60987,60495,60129,59883,52802,30367,30367,23445,18952,8863,8863,8863,8863,13426,5017,13426,9270,1949	1761,0,0,0,0,0,1217,0,1452,0,0,0,220,0,0,0,0,0,0,0,0,0,0,1033,0,0	1,1,-1,2,-1,-1,3,4,1,3,3,3,1,3,5,3,3,3,3,5,-1,-1,-1,2,-1,-1
ENSG00000271806.1_4	chr1	2072523	2076718	-	4196	0	0	1	0	0	0	0	0	1	0	0	0	RP5-892K4.1	ENSG00000271806.1_4	1	ENST00000606533.1_1	1	4195	0	4195	0	0	3
ENSG00000182873.5_4	chr1	2113233	2115828	-	1734	6	2	3	2	0	0	5	0	0	8	5	3	RP11-181G12.2	ENSG00000182873.5_4	2	ENST00000333854.2_1,ENST00000444529.1_1	2,3	1251,619	830,1035	947,398	830,748	0,0	4,5
ENSG00000162585.16_3	chr1	2115900	2144159	-	10916	323	363	402	338	353	280	350	0	90	345	401	385	FAAP20	ENSG00000162585.16_3	15	ENST00000400919.7_1,ENST00000469733.5_1,ENST00000428120.5_1,ENST00000414253.5_1,ENST00000400918.7_2,ENST00000497675.2_1,ENST00000378543.2_1,ENST00000378546.8_2,ENST00000401813.7_1,ENST00000487186.5_1,ENST00000476803.1_1,ENST00000440825.6_1,ENST00000420515.1_2,ENST00000514625.1_1,ENST00000420964.1_1	3,8,8,7,4,2,3,4,4,8,3,4,4,3,2	1410,2272,2305,2209,807,4476,566,725,2539,3568,698,851,1540,700,312	8904,20997,7958,8088,8769,88,4636,4501,7820,19604,3946,4308,1307,5119,91	1052,1049,1035,1035,338,4366,271,271,1900,2471,271,328,1074,446,287	8126,8126,3064,3858,8126,88,3858,3858,3874,8742,3858,2866,664,2908,91	0,0,1731,0,0,0,0,0,0,0,0,414,959,0,0	3,10,4,5,4,4,3,4,6,10,5,3,4,5,4
ENSG00000269554.1	chr1	2121237	2123179	+	1943	20	31	9	11	23	15	15	0	2	13	10	3	AL590822.2	ENSG00000269554.1	1	ENST00000597060.1	1	1942	0	1942	0	542	1
ENSG00000203301.2	chr1	2143360	2145620	-	2261	0	0	0	0	1	0	0	0	0	0	0	0	AL590822.1	ENSG00000203301.2	1	ENST00000545087.1	1	2260	0	2260	0	-649	1
ENSG00000234396.3_4	chr1	2143962	2152177	+	326	2	0	1	1	2	0	1	0	1	2	5	2	RP11-181G12.4	ENSG00000234396.3_4	1	ENST00000442483.2_1	2	324	7891	203	7891	0	-1
ENSG00000157933.9_2	chr1	2160134	2241558	+	6080	635	564	1170	474	699	567	1066	5	61	970	994	994	SKI	ENSG00000157933.9_2	4	ENST00000378536.4_1,ENST00000508416.1_1,ENST00000478223.2_1,ENST00000507179.1_1	7,2,3,2	5606,250,291,537	75818,70309,55089,185	3542,190,125,462	73243,70309,54907,185	2180,0,0,0	1,-1,-1,-1
ENSG00000116151.13_4	chr1	2252692	2323146	-	11337	152	179	317	229	171	182	219	0	46	267	248	231	MORN1	ENSG00000116151.13_4	11	ENST00000378531.7_1,ENST00000606372.5_1,ENST00000378529.7_1,ENST00000607342.5_1,ENST00000469374.5_1,ENST00000419785.1_1,ENST00000449373.2_4,ENST00000378525.2_1,ENST00000607031.1_1,ENST00000475812.1_1,ENST00000494279.2_3	14,12,11,4,5,4,5,7,1,2,2	1784,1948,1489,562,1902,578,4759,1641,3137,550,404	68670,57613,35043,16678,14462,12867,8725,11975,0,710,1588	326,627,289,279,1426,229,4374,925,3137,473,333	20582,20582,13766,13766,10421,10421,5751,5751,0,710,1588	0,0,0,0,0,0,4208,0,0,0,226	14,14,11,6,7,6,5,6,3,4,2
ENSG00000272161.1_5	chr1	2257640	2258132	-	493	0	0	0	0	0	0	0	0	0	0	0	1	RP4-713A8.1	ENSG00000272161.1_5	1	ENST00000607720.1_1	1	492	0	492	0	0	3
ENSG00000269753.1	chr1	2258581	2259042	+	462	0	0	0	0	0	0	0	0	0	0	0	0	AL589739.1	ENSG00000269753.1	1	ENST00000600779.1	1	461	0	461	0	0	-1
ENSG00000269896.2_4	chr1	2281853	2284259	-	2407	8	6	30	24	13	9	21	1	2	40	38	41	RP4-740C4.5	ENSG00000269896.2_4	2	ENST00000602865.1_1,ENST00000417061.2_1	1,1	2406,213	0,0	2406,213	0,0	0,0	3,3
ENSG00000272420.1_5	chr1	2294500	2295067	-	568	5	4	12	4	4	5	3	0	7	5	4	7	RP4-740C4.7	ENSG00000272420.1_5	1	ENST00000607858.1_1	1	567	0	567	0	0	3
ENSG00000178642.5	chr1	2316811	2319922	+	3110	0	0	0	0	0	1	0	0	0	0	0	1	AL513477.1	ENSG00000178642.5	1	ENST00000317490.5	2	3108	3	2926	3	0	-1
ENSG00000157916.19_3	chr1	2323214	2336883	+	5691	1934	2075	2264	1946	2274	2183	1781	5	82	1677	2104	2019	RER1	ENSG00000157916.19_3	9	ENST00000378513.7_1,ENST00000378518.5_1,ENST00000605895.5_3,ENST00000306256.13_3,ENST00000493207.1_1,ENST00000378512.5_1,ENST00000443438.5_1,ENST00000488353.2_3,ENST00000462129.1_1	6,5,7,8,2,7,6,6,2	2994,517,3037,687,684,1397,534,2463,583	10673,9980,10574,10534,3826,10464,8608,6748,693	2407,130,2409,135,583,716,109,1866,391	3826,3826,3826,3650,3826,3826,2553,2195,693	350,350,585,0,0,559,0,585,0	2,2,2,3,-1,2,2,1,-1
ENSG00000157911.9_3	chr1	2335403	2345236	-	3789	698	809	1204	1093	423	481	930	5	3	581	759	749	PEX10	ENSG00000157911.9_3	8	ENST00000288774.7_1,ENST00000447513.6_1,ENST00000507596.5_1,ENST00000510434.1_1,ENST00000508384.5_2,ENST00000515760.1_1,ENST00000502666.1_2,ENST00000514502.1_1	6,6,6,5,3,2,3,4	2865,1991,1935,902,608,601,650,544	5701,5761,5767,5115,4659,820,1582,3215	1870,1015,990,402,328,326,254,238	1940,1940,1940,1940,3146,820,1403,1523	0,0,0,0,0,0,575,0	6,6,6,4,5,4,1,2
ENSG00000149527.17_4	chr1	2357419	2436969	+	10781	17	33	12	3	22	27	11	0	5	89	12	9	PLCH2	ENSG00000149527.17_4	8	ENST00000609981.5_3,ENST00000449969.5_4,ENST00000419816.6_3,ENST00000378486.7_3,ENST00000343889.8_1,ENST00000278878.6_3,ENST00000473964.5_1,ENST00000462379.1_1	4,22,22,22,19,19,4,6	564,5428,4815,4815,6434,3762,6982,2335	53260,32639,24395,24395,20006,21626,764,4546	291,1909,1603,1603,3418,1354,5887,1606	47847,10814,4136,4136,4136,4136,411,2392	0,3368,4229,4229,0,3699,0,0	2,1,1,1,-1,-1,-1,-1
ENSG00000224387.1_4	chr1	2423739	2424697	-	455	0	0	0	0	0	0	0	0	0	1	0	0	RP3-395M20.2	ENSG00000224387.1_4	1	ENST00000424657.1_1	2	453	505	296	505	0	4
ENSG00000229393.1_4	chr1	2424876	2425918	-	514	0	0	0	0	0	0	0	0	0	1	1	0	RP3-395M20.3	ENSG00000229393.1_4	1	ENST00000442305.1_1	2	512	530	416	530	0	4
ENSG00000157881.13_3	chr1	2439972	2458067	-	5107	435	469	604	481	430	357	400	0	6	378	535	559	PANK4	ENSG00000157881.13_3	12	ENST00000378466.7_2,ENST00000435556.7_2,ENST00000505228.5_1,ENST00000502512.1_3,ENST00000471361.1_1,ENST00000487804.1_1,ENST00000515423.1_1,ENST00000468002.2_1,ENST00000486396.1_3,ENST00000502770.1_3,ENST00000491212.1_1,ENST00000514922.1_1	19,19,16,8,4,2,2,6,6,3,3,2	2658,2505,1897,698,718,716,428,664,873,1038,722,566	15437,15554,10209,3912,2002,963,1096,4198,6498,4718,4204,4664	527,523,265,151,489,633,375,155,214,840,586,433	4664,4664,2447,1205,1205,963,1096,2447,5149,4523,3801,4664	0,312,491,295,0,0,0,98,751,577,0,0	19,19,13,6,6,4,4,5,2,2,5,4
ENSG00000197921.5_2	chr1	2460184	2461684	-	1306	3	4	0	0	2	3	0	0	0	6	1	0	HES5	ENSG00000197921.5_2	1	ENST00000378453.3_1	3	1303	197	1004	100	0	3
ENSG00000272449.2_4	chr1	2461503	2478899	+	1531	38	27	8	10	18	16	8	0	6	31	23	12	RP3-395M20.12	ENSG00000272449.2_4	2	ENST00000644246.1_1,ENST00000606645.2_2	2,1	1529,1060	15867,0	1491,1060	15867,0	0,0	-1,-1
ENSG00000238164.6_5	chr1	2481359	2488470	-	6137	116	118	39	35	91	70	138	0	18	147	152	145	RP3-395M20.8	ENSG00000238164.6_5	6	ENST00000449660.5_1,ENST00000443892.2_1,ENST00000416860.2_2,ENST00000448624.2_1,ENST00000432521.2_1,ENST00000452793.1_1	3,2,6,2,2,4	1626,498,3516,806,3606,565	560,3827,3575,718,261,2225	1114,354,1972,606,3158,268	299,3827,1656,718,261,1385	0,0,0,0,0,0	5,4,8,4,4,6
ENSG00000157873.17_3	chr1	2487078	2496821	+	6219	398	301	254	170	373	309	415	3	15	495	317	295	TNFRSF14	ENSG00000157873.17_3	16	ENST00000426449.5_2,ENST00000434817.5_2,ENST00000435221.6_2,ENST00000451778.5_2,ENST00000409119.5_1,ENST00000355716.4_1,ENST00000475523.5_1,ENST00000442392.6_1,ENST00000482074.6_1,ENST00000496064.5_1,ENST00000463471.6_1,ENST00000466750.5_1,ENST00000471768.1_1,ENST00000463835.5_1,ENST00000482602.5_1,ENST00000480305.1_1	6,7,7,7,7,8,6,4,3,5,5,6,3,4,4,3	654,827,1218,820,889,1699,1639,836,954,1475,4250,2597,536,868,430,491	4421,5197,4795,5015,4607,5764,5804,1915,1502,3503,2928,3416,1426,2082,4270,1160	155,155,450,155,224,681,681,328,519,911,2255,1635,398,356,329,304	1355,1355,1355,1355,1355,1355,2897,993,993,1355,993,1050,780,1050,2157,908	0,0,0,0,576,844,0,0,0,0,0,0,0,0,73,0	2,2,2,2,2,1,-1,-1,-1,-1,-1,-1,-1,-1,-1,-1
ENSG00000225931.3_4	chr1	2497849	2501327	+	1297	2	0	1	0	0	0	1	0	0	3	0	0	RP3-395M20.7	ENSG00000225931.3_4	1	ENST00000456687.3_1	3	1294	2184	911	1261	0	-1
ENSG00000228037.1_4	chr1	2512999	2515972	+	626	4	1	0	0	0	0	0	0	1	2	1	2	RP3-395M20.9	ENSG00000228037.1_4	1	ENST00000424215.1_1	3	623	2350	408	1720	0	-1
ENSG00000157870.14_3	chr1	2517930	2522908	+	3371	393	454	580	468	479	447	617	2	9	340	483	483	FAM213B	ENSG00000157870.14_3	15	ENST00000493183.5_1,ENST00000474659.5_1,ENST00000444521.6_1,ENST00000378425.9_2,ENST00000419916.6_1,ENST00000378424.8_1,ENST00000537325.5_2,ENST00000378427.5_2,ENST00000464043.5_1,ENST00000465233.5_2,ENST00000498083.1_2,ENST00000481683.5_1,ENST00000484099.5_1,ENST00000477045.1_1,ENST00000476686.1_1	7,7,7,6,7,7,6,7,7,6,5,6,6,3,2	833,778,2820,2659,2742,2758,1090,2682,939,583,459,683,2571,616,2504	2308,2340,1897,2058,1951,1929,2061,1983,2049,1561,1656,1788,1820,1044,370	222,248,2057,2057,2058,2057,537,2053,395,204,204,253,2059,355,2058	598,598,544,598,598,544,598,598,598,598,598,598,598,598,370	0,0,734,573,680,689,570,633,0,0,0,0,0,0,0	-1,-1,1,1,1,1,1,-1,-1,-1,-1,-1,-1,-1,-1
ENSG00000142606.15_4	chr1	2522078	2564429	-	3844	0	0	3	0	2	0	1	0	0	9	4	4	MMEL1	ENSG00000142606.15_4	9	ENST00000471840.5_1,ENST00000378412.7_1,ENST00000502556.5_3,ENST00000504800.5_1,ENST00000491941.5_1,ENST00000464195.1_1,ENST00000469962.1_1,ENST00000509374.1_1,ENST00000511099.1_1	3,24,19,23,2,2,3,5,2	549,2825,1924,2420,480,557,457,541,552	1490,39522,36644,36148,694,628,961,4579,2669	450,446,163,163,333,333,259,161,439	1022,17127,17127,17127,694,628,848,2270,2669	353,0,0,0,0,0,0,0,0	3,24,19,18,4,4,5,7,4
ENSG00000237058.1_4	chr1	2564007	2568059	+	373	0	0	0	0	0	0	0	0	0	0	0	0	RP13-436F16.1	ENSG00000237058.1_4	1	ENST00000427302.1_1	2	371	3681	264	3681	0	-1
ENSG00000215912.12_4	chr1	2567415	2718282	-	8814	22	37	32	26	19	9	38	0	4	10	10	12	TTC34	ENSG00000215912.12_4	2	ENST00000401095.8_4,ENST00000637179.1_3	9,7	8805,1768	142062,131655	5919,527	123152,123152	0,0	9,7
ENSG00000283259.1_4	chr1	2690149	2693019	+	1565	0	0	0	0	0	0	0	0	0	0	0	0	ABC14-1188822O7.1	ENSG00000283259.1_4	1	ENST00000638002.1_1	10	1555	1315	479	415	0	-1
ENSG00000233234.1_4	chr1	2728415	2729257	-	607	0	0	0	0	0	0	0	0	0	0	0	0	RP11-740P5.2	ENSG00000233234.1_4	1	ENST00000457440.1_1	2	605	237	457	237	0	4
ENSG00000231630.1_4	chr1	2730997	2731563	-	429	0	0	0	0	0	0	0	0	0	0	0	0	RP11-740P5.3	ENSG00000231630.1_4	1	ENST00000429389.1_1	2	427	139	256	139	0	4
ENSG00000284745.1_2	chr1	2877223	2885272	-	1654	0	0	0	0	0	0	0	0	0	0	0	0	RP5-907A6.1	ENSG00000284745.1_2	2	ENST00000641229.1_1,ENST00000642073.1_1	3,3	1506,1139	1251,6550	927,567	1164,6463	0,0	5,5
ENSG00000169717.6_3	chr1	2938047	2939467	+	1421	0	0	0	0	0	0	0	0	1	0	0	0	ACTRT2	ENSG00000169717.6_3	1	ENST00000378404.3_1	1	1420	0	1420	0	1133	1
ENSG00000177133.10_4	chr1	2976179	2985001	-	5600	12	3	17	8	10	18	22	0	4	19	16	10	RP1-163G9.1	ENSG00000177133.10_4	8	ENST00000606861.1_1,ENST00000321399.7_1,ENST00000413472.5_1,ENST00000453118.5_1,ENST00000445317.1_1,ENST00000415573.1_1,ENST00000420957.1_1,ENST00000321336.1_1	1,6,4,3,7,2,2,2	2916,2220,557,1694,4240,278,433,662	0,1951,1577,721,4580,2115,3,3035	2916,1496,224,925,2948,236,233,432	0,503,824,503,3035,2115,3,3035	0,0,0,0,0,0,0,0	3,8,6,5,9,4,4,4
ENSG00000142611.16_3	chr1	2985732	3355185	+	9767	11	5	15	5	14	8	11	0	0	40	20	28	PRDM16	ENSG00000142611.16_3	10	ENST00000511072.5_1,ENST00000607632.1_1,ENST00000378391.6_1,ENST00000514189.5_1,ENST00000270722.9_1,ENST00000512462.5_1,ENST00000463591.1_1,ENST00000509860.1_2,ENST00000378389.5_1,ENST00000606170.1_1	16,2,17,16,17,16,3,13,5,2	4266,579,5430,4220,8673,3707,381,3724,1137,555	360908,116829,360794,360911,360737,192287,142405,34078,8039,301	1416,466,1687,1416,4944,1416,242,1416,418,534	141012,116829,141015,141012,141015,141015,141015,6837,4647,301	3521,0,3757,3518,3814,0,159,3242,0,0	1,-1,1,1,1,-1,-1,-1,-1,-1
ENSG00000226286.1_4	chr1	3049491	3050273	-	469	0	0	1	2	1	0	0	0	0	0	0	0	RP1-163G9.2	ENSG00000226286.1_4	1	ENST00000440516.1_1	2	467	315	331	315	0	4
ENSG00000279839.1_5	chr1	3122552	3125228	+	2677	0	4	1	0	1	0	2	0	1	3	1	1	RP11-193J6.1	ENSG00000279839.1_5	1	ENST00000624175.1_1	1	2676	0	2676	0	0	-1
ENSG00000272235.1_4	chr1	3223200	3226660	-	3461	0	2	1	0	0	1	1	0	0	0	0	0	RP11-22L13.1	ENSG00000272235.1_4	1	ENST00000607061.1_1	1	3460	0	3460	0	0	3
ENSG00000130762.14_4	chr1	3370990	3397677	+	5563	1161	1044	829	696	768	794	648	2	24	1419	1475	1452	ARHGEF16	ENSG00000130762.14_4	7	ENST00000378378.8_2,ENST00000378373.5_2,ENST00000378371.6_2,ENST00000445297.5_1,ENST00000464620.1_1,ENST00000418137.1_3,ENST00000485984.1_1	15,13,12,4,3,5,8	3046,2198,2207,832,1400,571,2332	23641,12910,11935,4145,1450,3824,6012	665,665,665,392,1064,167,737	8255,3485,3485,3485,1287,1287,1813	2116,1256,1256,0,0,0,0	2,4,3,2,-1,1,-1
ENSG00000272088.1_4	chr1	3403810	3404191	+	382	3	1	2	1	1	3	1	0	0	6	5	0	RP11-168F9.2	ENSG00000272088.1_4	1	ENST00000606489.1_1	1	381	0	381	0	0	-1
ENSG00000162591.15_2	chr1	3406484	3528059	-	7039	144	97	153	109	13	31	75	1	6	26	26	18	MEGF6	ENSG00000162591.15_2	7	ENST00000294599.8_1,ENST00000356575.8_1,ENST00000494257.1_1,ENST00000485002.6_1,ENST00000491842.1_1,ENST00000475790.5_1,ENST00000461795.1_1	30,37,3,37,7,5,3	4471,5418,1171,4668,736,878,415	37057,116151,2003,116047,5056,2497,1101	669,663,847,170,128,370,248	8597,55579,1680,48215,1680,1149,1004	0,0,0,0,0,0,0	30,37,5,31,9,7,5
ENSG00000207776.1	chr1	3477259	3477354	-	96	4	1	2	5	7	3	10	0	0	9	3	4	MIR551A	ENSG00000207776.1	1	ENST00000385042.1	1	95	0	95	0	0	3
ENSG00000238260.1_4	chr1	3539754	3541307	-	622	10	8	9	4	10	5	6	0	0	4	5	5	RP11-46F15.2	ENSG00000238260.1_4	1	ENST00000435049.1_1	3	619	934	366	752	0	5
ENSG00000158109.14_2	chr1	3541566	3546691	+	2414	1048	1477	1672	1621	2363	2373	1366	6	84	769	1792	1781	TPRG1L	ENSG00000158109.14_2	2	ENST00000378344.6_1,ENST00000344579.5_1	5,4	2409,2185	2716,2892	1718,1718	1611,1985	814,638	1,1
ENSG00000116213.15_2	chr1	3547331	3569325	-	7604	415	475	674	517	520	484	496	1	46	518	743	753	WRAP73	ENSG00000116213.15_2	10	ENST00000378322.7_1,ENST00000270708.11_1,ENST00000471223.1_1,ENST00000424367.5_1,ENST00000497940.5_1,ENST00000469643.1_1,ENST00000494884.1_1,ENST00000465916.5_1,ENST00000419924.2_1,ENST00000479331.1_1	11,12,2,9,5,3,2,8,6,2	1987,1653,6087,931,1096,560,431,771,597,444	17304,17653,1652,16882,3195,1580,86,16976,14194,2371	890,350,5212,152,737,290,273,152,152,314	7844,7844,1652,7844,1494,1494,86,7844,7844,2371	0,0,0,0,0,0,0,0,0,0	11,12,4,11,7,5,4,10,8,4
ENSG00000078900.14_4	chr1	3569084	3652765	+	6763	34	36	96	51	34	26	82	0	0	32	33	34	TP73	ENSG00000078900.14_4	14	ENST00000378295.8_2,ENST00000604074.5_3,ENST00000354437.8_2,ENST00000357733.7_2,ENST00000346387.8_2,ENST00000603362.5_4,ENST00000604479.5_4,ENST00000378285.5_2,ENST00000378280.5_2,ENST00000378288.8_2,ENST00000603364.5_1,ENST00000604194.1_1,ENST00000378290.4_2,ENST00000604566.1_1	14,11,13,12,12,11,11,11,11,12,8,2,12,6	5174,4795,2127,4887,4842,1657,1612,2106,2051,5108,1543,1090,1819,1352	78507,78886,78600,78748,78793,49056,49101,40514,40569,40421,37501,9398,33214,4537	3454,3454,545,3453,3453,332,332,545,545,3454,424,985,344,620	29692,29692,29692,29692,29692,24369,24369,16605,16605,16605,16605,9398,14230,1479	1898,1202,1488,1657,1612,1657,1612,1342,1271,1752,0,0,1687,0	2,2,2,2,2,1,1,1,1,1,-1,-1,2,-1
ENSG00000227589.1_4	chr1	3575502	3585336	-	754	4	5	6	1	10	6	2	0	0	1	2	3	RP5-1092A11.5	ENSG00000227589.1_4	1	ENST00000443034.1_1	3	751	9083	492	6360	0	5
ENSG00000235131.1_4	chr1	3628764	3630862	-	351	0	0	0	0	0	0	0	0	0	0	0	0	RP5-1092A11.2	ENSG00000235131.1_4	1	ENST00000416554.1_1	2	349	1749	238	1749	0	4
ENSG00000227372.11_3	chr1	3652165	3663900	-	7209	693	651	907	673	514	462	670	2	44	474	687	652	TP73-AS1	ENSG00000227372.11_3	10	ENST00000624167.1_2,ENST00000418088.5_2,ENST00000452079.5_2,ENST00000419973.1_2,ENST00000423764.5_3,ENST00000636630.1_1,ENST00000587071.5_2,ENST00000637775.1_1,ENST00000608600.1_1,ENST00000624948.1_3	1,6,4,3,5,6,4,8,5,4	987,3323,6354,654,2870,2523,733,1447,592,710	0,7469,4984,1046,7317,6906,4050,6861,4331,2414	987,1870,4403,383,1729,919,438,579,154,250	0,2417,2417,678,2417,2417,2043,2417,2417,1431	0,0,0,0,0,0,0,0,0,0	3,8,6,5,7,8,6,10,7,6
ENSG00000162592.9_3	chr1	3663024	3688209	+	4285	0	0	0	0	0	0	0	0	0	0	0	0	CCDC27	ENSG00000162592.9_3	3	ENST00000636250.1_1,ENST00000294600.6_1,ENST00000462521.2_1	6,12,12	2679,2164,2240	8050,17082,16960	1732,401,507	3374,4391,4391	0,1959,605	-1,1,1
ENSG00000235169.8_4	chr1	3689325	3692546	+	981	222	230	335	308	212	226	523	0	20	155	264	247	SMIM1	ENSG00000235169.8_4	4	ENST00000642557.1_1,ENST00000561886.2_2,ENST00000444870.7_2,ENST00000452264.1_1	4,3,4,2	442,506,543,445	2705,2393,2652,2118	184,371,187,356	2118,2118,2118,2118	0,113,235,0	3,3,3,2
ENSG00000130764.9_2	chr1	3695122	3713068	-	4516	1165	1314	1893	1402	1450	1384	1600	3	189	872	1518	1533	LRRC47	ENSG00000130764.9_2	3	ENST00000378251.2_1,ENST00000462356.5_1,ENST00000479239.1_1	7,4,5	4303,571,429	13643,2469,2328	2778,201,141	8552,1233,1060	0,0,281	7,6,2
ENSG00000266075.1	chr1	3699379	3699673	+	295	3	5	5	4	2	0	8	0	0	8	8	5	RN7SL574P	ENSG00000266075.1	1	ENST00000581512.1	1	294	0	294	0	0	-1
ENSG00000272153.1_4	chr1	3701572	3702102	+	531	3	7	7	5	4	1	23	0	3	6	7	8	RP1-286D6.5	ENSG00000272153.1_4	1	ENST00000607459.1_1	1	530	0	530	0	0	-1
ENSG00000116198.12_2	chr1	3728645	3773778	-	7876	749	919	1108	769	917	759	1017	0	26	853	1153	1171	CEP104	ENSG00000116198.12_2	11	ENST00000378230.7_1,ENST00000484420.1_1,ENST00000438539.5_1,ENST00000461667.1_1,ENST00000495701.1_1,ENST00000460038.5_1,ENST00000494653.5_1,ENST00000443466.1_1,ENST00000428079.5_1,ENST00000494951.1_1,ENST00000378223.3_1	22,2,7,6,2,4,12,4,7,4,7	6402,456,676,920,483,692,2162,426,911,386,1114	38716,763,12481,5677,1049,5353,21365,3622,17200,7561,12991	3436,278,221,465,305,221,364,197,305,229,325	6804,763,6804,2522,1049,2640,5131,1619,5131,5131,4468	0,0,113,370,0,0,0,0,0,0,0	22,4,7,6,4,6,14,6,9,6,7
ENSG00000169598.15_3	chr1	3773831	3801993	+	3870	213	210	391	288	227	219	247	0	35	184	271	274	DFFB	ENSG00000169598.15_3	12	ENST00000625756.2_1,ENST00000338895.7_2,ENST00000378209.7_2,ENST00000491998.5_1,ENST00000468793.5_1,ENST00000477548.5_1,ENST00000339350.7_1,ENST00000378206.5_1,ENST00000475969.5_1,ENST00000341385.4_1,ENST00000481945.1_1,ENST00000461150.1_1	3,7,7,8,8,8,7,7,7,4,3,2	646,3098,3021,3144,2978,2915,2998,2835,2724,568,633,684	2577,25055,25127,25004,24991,25041,24958,25077,25105,25569,4249,1238	450,1913,1922,1922,1922,1922,1922,1922,1922,234,390,391	1576,10935,10935,10370,10935,10935,10935,10935,10935,13633,2697,1238	309,1082,1010,806,345,309,348,240,345,246,0,234	1,1,1,1,1,1,1,1,1,1,-1,-1
ENSG00000264428.1	chr1	3800628	3800697	+	70	13	6	22	21	15	8	19	0	8	15	18	12	AL691523.1	ENSG00000264428.1	1	ENST00000579705.1	1	69	0	69	0	0	-1
ENSG00000198912.10_2	chr1	3805689	3816857	-	4388	529	700	867	641	486	437	622	2	30	449	603	602	C1orf174	ENSG00000198912.10_2	3	ENST00000486765.5_1,ENST00000361605.3_1,ENST00000474140.1_1	5,4,3	2512,1662,3496	8610,9498,7672	948,948,2427	3989,7176,7176	0,0,0	7,4,5
ENSG00000236423.5_3	chr1	3816936	3833789	+	4064	104	102	109	77	80	85	153	0	118	275	208	186	RP13-15E13.1	ENSG00000236423.5_3	3	ENST00000413332.5_1,ENST00000442673.1_1,ENST00000439488.1_1	3,2,4	631,3057,1936	4529,13764,13095	301,2830,1052	3334,13764,9656	0,0,0	-1,-1,-1
ENSG00000233304.6_3	chr1	4000625	4015322	+	3894	0	0	0	0	0	0	0	0	0	0	1	0	RP13-614K11.1	ENSG00000233304.6_3	3	ENST00000635619.1_1,ENST00000456897.5_1,ENST00000412674.1_1	3,3,3	556,558,3239	4341,8180,11406	274,324,3009	4045,7884,11110	0,0,0	-1,-1,-1
ENSG00000226374.2_3	chr1	4004607	4009040	-	1852	0	0	0	0	0	0	0	0	0	0	0	0	RP13-614K11.2	ENSG00000226374.2_3	3	ENST00000635247.1_1,ENST00000635127.1_1,ENST00000425194.1_1	6,4,3	1640,1398,934	2713,2941,897	638,638,638	812,1494,629	0,0,0	8,6,5
ENSG00000284668.1_2	chr1	4036193	4072759	+	1830	0	3	2	0	1	0	0	0	0	0	0	0	RP11-718D19.1	ENSG00000284668.1_2	3	ENST00000642026.1_1,ENST00000641562.1_1,ENST00000641078.1_1	3,6,4	750,534,1254	35816,21384,21461	468,275,799	35129,18485,19650	0,0,0	-1,-1,-1
ENSG00000284703.1_2	chr1	4072981	4079568	-	4817	0	1	0	0	3	1	1	0	1	0	2	0	RP11-718D19.2	ENSG00000284703.1_2	1	ENST00000642139.1_1	2	4815	1772	3785	1772	0	4
ENSG00000229280.1_3	chr1	4235588	4235959	-	372	0	0	0	0	0	0	0	0	1	0	0	0	RP11-374C13.1	ENSG00000229280.1_3	1	ENST00000449232.1_1	1	371	0	371	0	0	3
ENSG00000235054.3_3	chr1	4472087	4484749	+	2104	0	0	0	0	0	0	0	0	0	0	0	0	RP5-1166F10.1	ENSG00000235054.3_3	5	ENST00000635002.1_1,ENST00000423197.2_1,ENST00000635312.1_1,ENST00000633821.1_1,ENST00000635642.1_1	5,6,6,4,4	1387,2071,1421,575,1343	11275,10565,11142,10141,7035	695,693,693,236,695	6800,6212,6506,6212,6328	0,0,0,0,0	-1,-1,-1,-1,-1
ENSG00000284694.1_2	chr1	4539191	4544435	-	3402	0	0	0	0	0	0	0	0	0	0	0	0	RP5-1166F10.2	ENSG00000284694.1_2	1	ENST00000641472.1_1	2	3400	1844	3219	1844	0	4
ENSG00000227169.2_4	chr1	4611795	4612205	-	356	0	0	0	0	0	0	0	0	0	0	0	0	RP1-37J18.1	ENSG00000227169.2_4	1	ENST00000438791.2_1	2	354	56	314	56	0	4
ENSG00000232596.2_3	chr1	4631541	4654069	+	1994	0	0	0	0	0	0	0	0	0	0	0	0	RP1-37J18.2	ENSG00000232596.2_3	3	ENST00000634256.1_1,ENST00000635556.1_1,ENST00000420522.1_1	2,4,5	1105,910,677	21423,11294,11196	957,366,297	21423,9685,9685	0,0,0	-1,-1,-1
ENSG00000196581.10_2	chr1	4714792	4852594	+	12405	0	0	0	1	0	0	0	0	0	0	0	0	AJAP1	ENSG00000196581.10_2	3	ENST00000378190.7_1,ENST00000378191.4_1,ENST00000466761.1_1	6,6,2	2377,11660,296	120685,125829,714	799,9989,265	57154,57154,714	1231,1231,0	1,1,-1
ENSG00000284739.1_2	chr1	5024014	5033358	-	464	0	0	0	0	0	0	0	0	0	0	0	0	RP4-603B14.2	ENSG00000284739.1_2	1	ENST00000641254.1_1	3	461	8883	191	8554	0	5
ENSG00000284674.1_2	chr1	5033441	5041628	+	1580	0	0	0	0	0	0	0	0	0	0	0	0	RP4-603B14.1	ENSG00000284674.1_2	1	ENST00000641403.1_1	5	1575	6612	1087	3390	0	-1
ENSG00000231510.1_4	chr1	5146519	5150959	-	449	0	0	0	0	0	0	0	0	2	0	0	0	RP11-542C10.1	ENSG00000231510.1_4	1	ENST00000443270.1_1	4	445	3995	166	2207	0	6
ENSG00000284616.1_2	chr1	5361988	5367454	-	1225	0	0	0	0	0	0	0	0	0	0	0	0	RP4-703E10.1	ENSG00000284616.1_2	1	ENST00000641871.1_1	4	1221	4245	628	1913	0	6
ENSG00000284692.1_2	chr1	5538796	5553117	-	2316	0	0	0	0	0	0	0	0	0	0	0	0	RP1-58B11.2	ENSG00000284692.1_2	2	ENST00000641426.1_1,ENST00000641860.1_1	3,3	676,2207	13477,1055	437,1786	12303,907	0,0	5,5
ENSG00000284666.1_2	chr1	5540847	5542088	-	609	0	0	0	0	0	0	0	0	0	0	0	0	RP1-58B11.3	ENSG00000284666.1_2	1	ENST00000641583.1_1	2	607	634	535	634	0	4
ENSG00000260972.1_4	chr1	5553038	5554734	+	1697	0	0	0	0	0	0	0	0	0	0	0	0	RP1-58B11.1	ENSG00000260972.1_4	1	ENST00000564261.1_1	1	1696	0	1696	0	0	-1
ENSG00000283356.1_4	chr1	5614807	5614941	+	135	0	0	0	0	0	0	0	0	0	0	0	0	RP3-491M17.1	ENSG00000283356.1_4	1	ENST00000637697.1_1	1	134	0	134	0	0	-1
ENSG00000236948.2_5	chr1	5621769	5728355	-	1095	0	0	0	0	0	0	0	0	0	0	0	0	RP11-154H17.1	ENSG00000236948.2_5	2	ENST00000637702.1_1,ENST00000413887.1_1	3,2	844,361	105702,80566	545,207	104786,80566	0,0	5,4
ENSG00000264341.1	chr1	5624131	5624203	+	73	0	0	0	0	0	0	0	0	0	0	0	0	MIR4417	ENSG00000264341.1	1	ENST00000579887.1	1	72	0	72	0	0	-1
ENSG00000216045.2	chr1	5875931	5876019	-	89	0	0	0	0	0	0	0	0	0	0	0	0	AL356693.1	ENSG00000216045.2	1	ENST00000401226.2	1	88	0	88	0	0	3
ENSG00000264101.1	chr1	5922732	5922801	-	70	1	0	1	0	2	1	1	0	0	1	1	2	MIR4689	ENSG00000264101.1	1	ENST00000582517.1	1	69	0	69	0	0	3
ENSG00000131697.17_4	chr1	5922871	6052533	-	13167	523	488	718	460	460	383	598	2	33	991	999	1014	NPHP4	ENSG00000131697.17_4	11	ENST00000460696.1_1,ENST00000378161.5_1,ENST00000478423.6_1,ENST00000489180.6_1,ENST00000378156.8_2,ENST00000378169.7_1,ENST00000468253.1_1,ENST00000506941.1_1,ENST00000470763.1_1,ENST00000622020.4_2,ENST00000466897.1_1	3,3,26,33,30,27,3,2,2,20,6	3964,4367,4441,5515,4964,4186,778,568,3154,2984,1186	877,1197,125172,124145,124689,124996,5981,1993,2816,109984,17643	2120,3647,594,592,587,226,589,373,2735,229,477	572,625,22985,18436,18436,21869,5356,1993,2816,18436,13589	0,0,0,0,0,0,0,0,0,0,777	5,5,28,20,30,7,5,4,4,20,4
ENSG00000266687.1	chr1	5953899	5953984	-	86	1	1	2	0	0	0	1	0	0	3	3	3	AL356261.1	ENSG00000266687.1	1	ENST00000585151.1	1	85	0	85	0	0	3
ENSG00000069424.14_2	chr1	6051526	6161253	+	9534	223	195	353	211	222	207	319	0	5	192	216	233	KCNAB2	ENSG00000069424.14_2	19	ENST00000378111.5_1,ENST00000378097.5_1,ENST00000493807.1_1,ENST00000378092.5_1,ENST00000478098.5_1,ENST00000445501.5_1,ENST00000352527.5_1,ENST00000341524.5_1,ENST00000389632.8_1,ENST00000428161.5_1,ENST00000602612.5_1,ENST00000435937.5_1,ENST00000164247.5_1,ENST00000459822.1_1,ENST00000472700.6_1,ENST00000378083.7_1,ENST00000458166.6_1,ENST00000462676.2_1,ENST00000481789.1_1	8,16,3,15,5,5,15,16,13,12,15,6,16,3,8,16,14,3,3	814,4185,557,1187,408,481,4150,4191,946,949,2381,494,4257,853,528,4126,1322,680,913	107895,104645,14430,104686,80733,79598,71029,70988,68335,68376,69860,57458,62639,4992,45216,51132,51419,3422,1641	352,2708,221,128,128,200,2707,2707,145,145,1292,162,2694,594,204,2694,370,623,500	48961,47729,11355,47729,47729,30883,32110,30883,30883,32110,30883,32110,30883,4469,30883,21001,26572,2930,1128	515,1089,0,1048,0,0,1048,1089,0,0,1174,0,1089,0,480,1233,892,366,0	2,2,-1,2,-1,3,2,2,2,2,2,-1,2,-1,-1,2,4,-1,-1
ENSG00000268332.1	chr1	6100630	6101399	-	81	0	0	0	0	0	0	0	0	0	0	0	0	AL035406.1	ENSG00000268332.1	1	ENST00000594544.1	2	79	690	69	690	0	4
ENSG00000116254.17_2	chr1	6161853	6240183	-	9890	79	67	10	11	2	2	5	0	7	153	44	51	CHD5	ENSG00000116254.17_2	6	ENST00000262450.7_1,ENST00000475121.1_1,ENST00000462991.5_1,ENST00000377999.5_1,ENST00000496404.1_1,ENST00000491020.1_1	42,3,31,21,34,6	9604,555,4365,3023,4932,640	68726,1136,34658,23633,70000,2368	3634,346,346,344,336,174	11668,807,7689,8107,11668,882	0,289,1210,2695,0,264	41,3,24,3,26,4
ENSG00000116251.9_3	chr1	6241329	6269449	-	4900	4733	7790	7528	6851	4669	4237	5068	10	37	3650	5970	6026	RPL22	ENSG00000116251.9_3	8	ENST00000484532.5_2,ENST00000234875.8_1,ENST00000480661.1_1,ENST00000497965.5_1,ENST00000471204.5_1,ENST00000465387.5_1,ENST00000462296.5_1,ENST00000465335.1_1	3,4,3,4,5,4,4,5	446,2074,2276,782,519,504,596,801	16042,12518,10712,13445,22033,12326,9971,15658	217,1796,1911,353,124,183,238,261	11444,6114,6114,6114,10925,6114,4598,7931	0,0,0,0,0,0,0,0	3,4,5,4,7,6,6,7
ENSG00000226944.1_5	chr1	6264900	6265840	-	378	9	7	13	5	3	6	4	0	0	7	4	5	RP1-120G22.11	ENSG00000226944.1_5	1	ENST00000455744.1_1	3	375	565	207	341	0	5
ENSG00000158286.12_2	chr1	6265535	6281359	+	6585	206	183	383	282	184	205	316	3	57	360	386	427	RNF207	ENSG00000158286.12_2	9	ENST00000466994.5_1,ENST00000484435.1_1,ENST00000377939.4_1,ENST00000485539.5_1,ENST00000496676.5_1,ENST00000463453.1_1,ENST00000496329.1_1,ENST00000492476.1_1,ENST00000483336.1_1	4,3,18,6,10,3,2,4,4	1850,548,3906,1407,3010,263,229,608,469	982,887,11217,875,8935,888,749,1193,6136	928,190,2063,530,1569,130,180,186,165	653,653,5106,385,5106,805,749,749,5106	0,0,1888,0,0,0,0,0,0	-1,-1,2,-1,-1,-1,-1,-1,-1
ENSG00000116237.15_2	chr1	6281253	6296032	-	4910	3447	3506	4326	3995	2497	2704	2937	11	124	1953	3165	3045	ICMT	ENSG00000116237.15_2	4	ENST00000343813.9_1,ENST00000495791.1_1,ENST00000489498.5_1,ENST00000474756.1_1	5,2,6,4	4766,326,2606,1223	9981,1278,9875,10150	4069,262,1771,663	6640,1278,6640,6640	0,0,0,0	5,4,3,2
ENSG00000225077.2_2	chr1	6296300	6299504	+	1685	21	20	13	12	4	7	13	0	3	5	8	10	LINC00337	ENSG00000225077.2_2	2	ENST00000441724.1_1,ENST00000429480.2_1	5,2	1133,1300	1567,373	719,1223	630,373	0,0	-1,-1
ENSG00000173673.7_2	chr1	6304252	6305638	+	697	1	0	0	0	0	0	0	0	0	0	0	0	HES3	ENSG00000173673.7_2	1	ENST00000377898.3_1	4	693	693	468	481	558	2
ENSG00000158292.6_2	chr1	6307406	6321035	-	4082	15	13	14	9	4	9	6	0	0	14	35	32	GPR153	ENSG00000158292.6_2	1	ENST00000377893.2_1	6	4076	9553	2657	5811	0	6
ENSG00000097021.19_3	chr1	6324329	6454451	-	4124	675	951	878	718	563	501	768	5	4	424	567	575	ACOT7	ENSG00000097021.19_3	10	ENST00000608083.5_2,ENST00000377842.7_1,ENST00000377845.7_1,ENST00000377855.6_1,ENST00000377860.8_1,ENST00000418124.5_1,ENST00000545482.5_1,ENST00000361521.8_1,ENST00000473466.2_2,ENST00000481175.1_1	9,9,9,9,10,10,9,9,8,3	1394,1804,1423,1605,1462,1554,1795,2420,860,745	127698,93267,95011,119935,127626,127534,127698,127698,70259,13506	426,518,422,422,422,422,509,1134,156,640	43391,23512,23512,35628,43391,43391,43391,43391,23512,12068	0,0,0,0,0,0,0,0,0,0	9,9,9,9,9,8,9,9,10,5
ENSG00000271746.1_4	chr1	6453615	6454451	+	837	2	11	5	8	4	8	5	0	1	11	7	4	RP1-202O8.3	ENSG00000271746.1_4	1	ENST00000607670.1_2	1	836	0	836	0	0	-1
ENSG00000069812.11_2	chr1	6472478	6484730	-	5407	41	45	10	5	29	17	2	0	6	27	5	4	HES2	ENSG00000069812.11_2	6	ENST00000377837.5_1,ENST00000377836.8_1,ENST00000471190.1_1,ENST00000377834.8_1,ENST00000487437.5_1,ENST00000489730.1_1	4,3,2,4,3,3	1218,504,347,4258,965,727	11034,6399,3234,429,528,341	864,282,232,3921,739,491	6325,6325,3234,267,454,267	0,0,0,0,0,0	4,3,4,4,3,3
ENSG00000187017.16_4	chr1	6484836	6521427	+	6952	926	990	679	459	388	328	1334	0	137	903	1087	1073	ESPN	ENSG00000187017.16_4	18	ENST00000645284.1_1,ENST00000636330.1_2,ENST00000377828.5_2,ENST00000633651.1_1,ENST00000632142.1_1,ENST00000418286.1_3,ENST00000632803.1_1,ENST00000632593.1_2,ENST00000416731.5_1,ENST00000461727.6_2,ENST00000475228.6_4,ENST00000478323.1_2,ENST00000633239.1_1,ENST00000475479.2_2,ENST00000636644.1_3,ENST00000434576.2_4,ENST00000477679.2_2,ENST00000468561.2_2	13,11,13,3,3,5,3,2,8,8,7,3,7,3,4,6,4,2	3530,4720,3518,563,561,636,452,504,1330,1331,806,267,1487,357,540,741,875,659	32638,27163,32638,2934,2693,4743,1273,1182,11025,11025,10779,171,10384,1218,5406,8968,7813,200	945,2237,945,206,196,201,163,396,401,400,263,161,927,145,263,263,406,472	11835,11835,11835,2748,2507,3416,1182,1182,5088,5088,5088,91,5088,1133,5088,5088,5088,200	2552,4078,2552,0,0,0,0,0,860,860,0,0,707,0,0,559,616,0	1,1,1,-1,-1,-1,2,2,2,2,3,2,-1,2,1,-1,-1,-1
ENSG00000265392.1	chr1	6489894	6489956	-	63	0	0	0	0	0	0	0	0	0	0	0	0	MIR4252	ENSG00000265392.1	1	ENST00000585139.1	1	62	0	62	0	0	3
ENSG00000231868.1_4	chr1	6503094	6507066	-	351	10	7	5	1	1	2	4	0	1	5	6	8	RP1-202O8.2	ENSG00000231868.1_4	1	ENST00000419034.1_1	3	348	3624	135	2393	0	5
ENSG00000215788.9_3	chr1	6521211	6526255	-	3918	24	14	16	11	7	10	8	0	3	20	14	10	TNFRSF25	ENSG00000215788.9_3	20	ENST00000473343.5_1,ENST00000513135.5_1,ENST00000485036.5_1,ENST00000480393.5_1,ENST00000377782.7_1,ENST00000356876.7_1,ENST00000351959.9_1,ENST00000414040.6_1,ENST00000351748.7_1,ENST00000348333.7_1,ENST00000502588.5_1,ENST00000502730.5_1,ENST00000510563.5_1,ENST00000453260.6_1,ENST00000475730.5_1,ENST00000469691.5_1,ENST00000481401.5_1,ENST00000461703.6_1,ENST00000453341.1_1,ENST00000515145.1_1	4,6,9,9,10,10,9,9,5,9,7,5,8,4,3,7,7,6,5,2	1587,3477,1717,1697,1622,1615,1432,1189,700,1110,945,833,1079,980,474,794,757,561,793,570	884,1471,3307,3327,3402,3429,3539,3484,3973,3563,3728,3840,3594,887,377,2484,2236,2010,1195,721	759,1856,611,611,611,611,558,328,328,328,328,328,328,484,288,184,190,167,342,418	455,455,1228,1248,1228,1248,1248,1405,2777,1248,1712,2378,1712,455,232,1248,1248,815,509,721	0,0,0,0,0,0,0,0,0,0,0,0,0,0,0,0,0,0,0,0	6,8,7,6,10,10,9,7,5,9,5,4,6,6,5,9,9,8,7,4
ENSG00000171680.21_3	chr1	6526152	6580121	-	7053	220	185	230	169	187	186	143	1	16	375	305	292	PLEKHG5	ENSG00000171680.21_3	13	ENST00000489097.5_1,ENST00000535355.5_1,ENST00000400913.5_1,ENST00000340850.9_1,ENST00000537245.5_1,ENST00000377748.5_1,ENST00000487949.4_1,ENST00000377725.5_1,ENST00000377728.7_1,ENST00000377732.5_1,ENST00000400915.7_1,ENST00000377740.4_1,ENST00000639593.1_1	19,21,21,21,22,22,9,22,21,21,22,22,2	4949,4704,4677,4694,4772,5199,2655,3453,3592,3732,3675,3528,208	6547,14673,15185,19794,26232,48718,1806,19995,20986,25842,26593,49411,9457	1480,1480,1480,1480,1480,1480,761,487,761,761,761,616,132	1493,7666,8178,12787,18835,22876,560,12787,13979,18835,18835,22876,9457	0,0,0,0,0,0,0,0,0,0,0,0,0	21,21,21,21,22,22,11,21,21,21,22,22,4
ENSG00000162408.10_2	chr1	6581407	6614595	-	7293	936	844	2277	1687	1538	1619	1903	4	320	1689	2365	2407	NOL9	ENSG00000162408.10_2	5	ENST00000377705.5_1,ENST00000464383.1_1,ENST00000462798.1_1,ENST00000460777.1_1,ENST00000464665.1_1	12,5,2,2,2	6637,830,636,534,729	26551,12192,520,698,4409	4656,297,531,442,393	8389,8389,520,698,4409	0,0,0,0,0	12,7,4,4,4
ENSG00000253022.1	chr1	6600914	6601024	+	111	0	0	0	1	0	0	0	0	0	0	0	0	RNU6-731P	ENSG00000253022.1	1	ENST00000517213.1	1	110	0	110	0	0	-1
ENSG00000229519.2_4	chr1	6607965	6608679	+	401	0	0	0	0	0	0	0	0	0	0	0	0	RP11-58A11.2	ENSG00000229519.2_4	1	ENST00000456162.2_1	2	399	315	228	315	0	-1
ENSG00000173662.20_3	chr1	6615241	6639817	+	2892	17	30	51	44	40	43	52	0	2	81	100	107	TAS1R1	ENSG00000173662.20_3	4	ENST00000333172.10_1,ENST00000351136.7_1,ENST00000411823.5_1,ENST00000415267.1_1	6,5,3,4	2886,1866,1808,736	21690,22451,6677,7749	1104,973,773,274	15345,15345,3416,5200	2520,1759,1217,0	1,1,-1,-1
ENSG00000204859.12_3	chr1	6640061	6649340	+	4503	304	303	327	297	317	349	305	0	4	268	330	331	ZBTB48	ENSG00000204859.12_3	8	ENST00000319084.9_1,ENST00000435905.5_1,ENST00000377674.8_1,ENST00000488936.1_1,ENST00000482360.5_1,ENST00000498342.5_1,ENST00000466813.1_1,ENST00000466941.1_1	3,3,11,7,7,3,6,2	1047,998,2282,777,2477,2458,784,521	1251,1230,6950,7240,1501,615,1120,72	758,758,758,241,1485,1220,244,364	759,759,3620,3620,428,428,428,72	0,0,2057,0,0,0,383,0	2,2,2,2,-1,-1,-1,-1
ENSG00000162413.16_3	chr1	6650784	6674667	-	6901	1982	1987	1943	1370	2390	1977	1320	2	70	1631	1952	2264	KLHL21	ENSG00000162413.16_3	6	ENST00000377658.8_1,ENST00000377663.3_1,ENST00000467612.5_1,ENST00000610898.1_1,ENST00000496707.5_3,ENST00000463043.1_1	4,3,4,2,4,4	4483,6442,1052,1943,820,663	7662,5835,20315,8536,5615,19863	2934,4833,465,1713,405,405	3490,3490,14998,8536,3490,14998	0,0,0,-103,0,0	4,3,4,2,6,4
ENSG00000116273.5_2	chr1	6673745	6684093	+	3681	494	481	737	491	497	428	693	0	3	763	738	757	PHF13	ENSG00000116273.5_2	2	ENST00000377648.4_1,ENST00000495385.1_1	4,2	3677,796	6671,8087	2622,453	2945,8087	899,0	1,-1
ENSG00000041988.15_5	chr1	6684926	6695646	+	4072	211	238	346	308	282	322	298	2	0	282	350	325	THAP3	ENSG00000041988.15_5	8	ENST00000054650.8_1,ENST00000484676.1_1,ENST00000307896.10_1,ENST00000377627.7_1,ENST00000484669.6_1,ENST00000487819.5_2,ENST00000472925.1_5,ENST00000480647.1_1	6,2,5,5,4,6,4,2	1360,877,1041,2048,740,834,979,334	7339,2471,7146,8346,7335,7062,6842,1597	769,756,572,1566,477,325,660,296	3207,2471,3207,3207,4996,3207,3207,1597	715,0,712,523,0,371,690,0	2,-1,1,1,-1,-1,-1,-1
ENSG00000007923.15_2	chr1	6694228	6761984	-	5083	1658	1768	2666	1747	1880	1739	2193	5	47	1296	1976	2040	DNAJC11	ENSG00000007923.15_2	11	ENST00000465508.5_1,ENST00000451196.5_1,ENST00000377577.9_1,ENST00000294401.11_1,ENST00000472414.1_1,ENST00000426784.1_1,ENST00000473993.5_1,ENST00000469318.5_1,ENST00000485073.5_1,ENST00000460594.5_1,ENST00000465911.1_1	7,8,16,15,6,8,7,4,5,5,4	3007,1349,3295,2195,719,967,748,351,608,576,741	7882,45520,64461,64616,7092,55035,55198,14945,47387,47139,30617	1532,616,1532,587,281,178,129,128,230,179,449	4501,13670,20692,20692,4501,20692,20692,13670,20692,20692,20692	0,360,0,0,0,0,0,0,0,0,0	9,8,16,15,8,10,9,6,7,7,6
ENSG00000228750.6_3	chr1	6784697	6790072	+	2188	0	0	0	0	0	0	0	0	1	0	0	0	RP11-242F24.1	ENSG00000228750.6_3	5	ENST00000432429.5_1,ENST00000414210.5_1,ENST00000635029.1_1,ENST00000635092.1_1,ENST00000421469.2_1	2,2,2,3,3	1684,505,543,630,544	1087,4870,2231,4686,4691	1471,292,363,269,292	1087,4870,2231,2578,2583	0,0,0,0,0	-1,-1,-1,-1,-1
ENSG00000239166.1	chr1	6812779	6812881	+	103	0	0	0	0	0	0	0	0	0	0	0	0	snoU13	ENSG00000239166.1	1	ENST00000459253.1	1	102	0	102	0	0	-1
ENSG00000284744.1_2	chr1	6828014	6830098	+	987	0	0	0	0	0	0	0	0	2	0	0	0	RP11-242F24.2	ENSG00000284744.1_2	1	ENST00000641757.1_1	3	984	1100	808	965	0	-1
ENSG00000237436.1_4	chr1	6843952	6844903	-	415	21	26	21	22	13	15	9	0	0	7	10	7	RP11-312B8.1	ENSG00000237436.1_4	1	ENST00000442889.1_1	3	412	539	185	435	0	5
ENSG00000171735.18_3	chr1	6845384	7829766	+	10033	826	889	666	602	486	481	743	2	5	915	785	762	CAMTA1	ENSG00000171735.18_3	16	ENST00000303635.11_1,ENST00000490738.5_1,ENST00000476163.5_1,ENST00000473578.5_1,ENST00000557126.5_1,ENST00000467404.6_1,ENST00000461311.1_1,ENST00000486138.1_1,ENST00000482934.1_1,ENST00000470648.5_1,ENST00000461580.5_1,ENST00000472283.1_1,ENST00000467267.1_1,ENST00000495233.5_1,ENST00000490905.5_1,ENST00000476864.1_1	23,3,4,4,4,4,5,4,3,3,4,2,3,11,6,6	8421,535,859,563,482,542,426,388,740,763,822,382,661,3236,2047,708	975961,86064,101878,85995,101892,85959,101809,64482,62338,34382,34276,18568,13125,28212,20895,20853	3247,296,547,281,211,262,133,118,534,539,496,288,367,1397,1397,246	266094,46547,46547,46547,62444,46547,46547,46547,61030,18568,18568,18568,11817,13926,13926,13926	4999,0,0,239,302,275,218,131,117,0,0,0,0,1902,713,708	1,-1,-1,1,1,1,-1,-1,-1,-1,-1,-1,-1,-1,-1,1
ENSG00000227950.1_4	chr1	6894393	6894678	-	286	0	0	0	0	0	0	0	0	0	0	0	0	RP11-312B8.2	ENSG00000227950.1_4	1	ENST00000433407.1_1	1	285	0	285	0	0	3
ENSG00000237365.1_4	chr1	7068436	7074339	-	349	0	0	0	0	0	0	0	0	0	0	0	0	RP11-334N17.1	ENSG00000237365.1_4	1	ENST00000456701.1_1	2	347	5556	319	5556	0	4
ENSG00000207056.1	chr1	7279420	7279584	+	165	0	1	0	0	0	0	0	0	0	0	0	0	RNU1-8P	ENSG00000207056.1	1	ENST00000384328.1	1	164	0	164	0	0	-1
ENSG00000237402.1_4	chr1	7429003	7430331	+	365	1	0	0	0	0	1	0	0	0	0	0	0	RP3-453P22.1	ENSG00000237402.1_4	1	ENST00000427317.1_1	2	363	965	189	965	0	-1
ENSG00000237728.2_4	chr1	7442548	7449814	-	743	0	0	0	0	0	0	0	0	0	0	0	0	RP3-453P22.2	ENSG00000237728.2_4	2	ENST00000618051.1_1,ENST00000411708.1_1	4,2	428,389	6838,847	185,310	6617,847	0,0	6,4
ENSG00000225126.1_4	chr1	7501156	7501614	-	361	0	0	0	0	0	0	0	0	0	0	0	0	RP4-549F15.1	ENSG00000225126.1_4	1	ENST00000440032.1_1	2	359	99	274	99	0	4
ENSG00000270171.1_4	chr1	7753184	7754904	-	1721	0	0	0	1	1	0	0	0	0	1	2	2	RP11-338N10.1	ENSG00000270171.1_4	1	ENST00000602640.1_1	1	1720	0	1720	0	0	3
ENSG00000270035.1_4	chr1	7758363	7758932	-	570	2	2	0	3	2	2	5	0	0	4	3	6	RP11-338N10.2	ENSG00000270035.1_4	1	ENST00000602973.1_1	1	569	0	569	0	0	3
ENSG00000269978.1_4	chr1	7760764	7761030	-	267	2	3	4	3	0	1	5	0	0	6	5	5	RP11-338N10.3	ENSG00000269978.1_4	1	ENST00000602916.1_1	1	266	0	266	0	0	3
ENSG00000049245.12_3	chr1	7831329	7841492	+	2760	1820	2471	3563	3341	3484	3398	2832	7	90	2485	3498	3595	VAMP3	ENSG00000049245.12_3	3	ENST00000054666.10_1,ENST00000470357.1_1,ENST00000487194.1_1	5,5,2	2200,949,272	7963,6150,800	1806,491,221	3649,3649,800	298,216,0	1,3,-1
ENSG00000269925.1_5	chr1	7836443	7836835	+	393	26	35	19	23	18	16	23	0	0	16	16	30	RP3-467L1.6	ENSG00000269925.1_5	1	ENST00000602406.1_1	1	392	0	392	0	0	-1
ENSG00000049246.14_2	chr1	7844380	7905237	+	8099	397	494	535	442	358	309	388	0	11	458	370	372	PER3	ENSG00000049246.14_2	9	ENST00000377541.5_1,ENST00000613533.4_1,ENST00000614998.4_1,ENST00000377532.7_1,ENST00000361923.2_1,ENST00000473653.1_1,ENST00000602883.1_1,ENST00000463106.1_1,ENST00000494684.1_1	10,22,23,21,21,4,1,3,2	1514,6296,6238,6258,6182,519,1248,712,553	18124,54451,54509,54265,54292,2296,0,6584,5523	351,2504,2504,2505,2505,293,1248,454,341	5714,8697,8697,8697,8718,1135,0,6045,5523	1128,3612,3554,3612,3585,0,0,0,0	2,2,2,1,1,-1,-1,-1,-1
ENSG00000236266.1_4	chr1	7870302	7887402	-	830	0	0	0	0	0	0	0	0	1	0	0	0	RP3-467L1.4	ENSG00000236266.1_4	1	ENST00000451646.1_1	3	827	16273	474	15500	0	5
ENSG00000049247.13_2	chr1	7903143	7913572	-	1791	0	0	0	0	0	0	0	0	1	2	0	0	UTS2	ENSG00000049247.13_2	3	ENST00000377516.6_1,ENST00000361696.9_1,ENST00000054668.5_1	7,4,5	1594,555,415	8835,4866,5250	867,268,124	2742,1979,1979	0,0,0	7,4,5
ENSG00000049249.8_3	chr1	7975954	8003225	-	6331	4	5	3	1	1	3	4	0	12	27	15	11	TNFRSF9	ENSG00000049249.8_3	4	ENST00000615230.4_1,ENST00000377507.7_1,ENST00000474475.1_3,ENST00000492571.1_1	9,8,3,5	5961,1915,442,579	21310,19104,12858,4598	5029,1076,221,169	12239,12239,11141,1717	0,0,183,356	9,8,3,3
ENSG00000270330.1_4	chr1	8002432	8002786	+	355	0	0	0	0	0	0	0	0	0	0	0	0	RP5-892F13.2	ENSG00000270330.1_4	1	ENST00000603760.1_1	1	354	0	354	0	0	-1
ENSG00000116288.12_3	chr1	8014351	8045565	+	2397	2668	4049	3661	3072	3156	2686	2680	7	12	1738	2967	3012	PARK7	ENSG00000116288.12_3	10	ENST00000493373.5_3,ENST00000460192.5_1,ENST00000338639.9_1,ENST00000493678.5_1,ENST00000377493.9_1,ENST00000465354.5_1,ENST00000377491.5_1,ENST00000377488.5_1,ENST00000497113.1_1,ENST00000469225.1_1	7,6,7,7,6,5,7,7,5,5	617,561,942,1081,789,944,970,776,665,706	30144,8824,22674,22732,22791,8829,22386,22366,8525,19225	158,154,385,611,387,627,356,217,328,418	8440,3660,7156,7156,7156,3920,7156,7156,3920,7126	0,0,564,564,505,0,564,564,0,478	2,-1,2,2,2,-1,2,2,-1,-1
ENSG00000200344.1	chr1	8042941	8043043	-	103	0	0	0	0	0	0	0	0	0	0	0	0	Y_RNA	ENSG00000200344.1	1	ENST00000363474.1	1	102	0	102	0	0	3
ENSG00000284747.1_2	chr1	8051194	8065372	+	4116	20	16	20	29	44	40	22	0	25	50	53	46	CTA-215D11.6	ENSG00000284747.1_2	2	ENST00000641354.1_1,ENST00000642135.1_1	6,2	2095,2234	12083,1187	1324,1188	3645,1187	0,0	-1,-1
ENSG00000284716.1_2	chr1	8058247	8059994	-	1043	1	2	4	1	8	6	2	1	94	20	15	8	CTA-215D11.5	ENSG00000284716.1_2	1	ENST00000641100.1_1	2	1041	706	861	706	0	4
ENSG00000116285.12_2	chr1	8064464	8086368	-	4186	8386	10203	5883	5047	4733	4746	2295	25	48	6182	6728	7170	ERRFI1	ENSG00000116285.12_2	5	ENST00000474874.5_1,ENST00000377482.9_1,ENST00000467067.1_1,ENST00000469499.5_1,ENST00000487559.1_1	3,4,2,3,4	476,3100,2095,992,783	21403,11489,111,11565,11473	197,2677,1957,657,356	10937,10466,111,10466,10466	0,0,0,0,0	3,4,2,3,3
ENSG00000238290.1_4	chr1	8086798	8182762	+	2044	45	55	26	12	18	19	7	0	21	21	20	22	RP11-431K24.1	ENSG00000238290.1_4	1	ENST00000445300.1_1	3	2041	93923	1228	92117	0	-1
ENSG00000232848.1_4	chr1	8117305	8118523	-	800	0	0	2	0	2	2	0	0	0	1	2	0	CTA-215D11.4	ENSG00000232848.1_4	1	ENST00000399343.2_1	2	798	420	696	420	0	4
ENSG00000229305.1_4	chr1	8249884	8252830	+	1075	2	1	1	1	2	0	0	0	0	2	2	0	RP11-431K24.2	ENSG00000229305.1_4	1	ENST00000453364.1_1	4	1071	1875	507	885	0	-1
ENSG00000227634.2_3	chr1	8262489	8275270	+	950	6	12	1	2	1	1	2	0	0	3	4	2	RP11-431K24.3	ENSG00000227634.2_3	2	ENST00000635451.1_1,ENST00000452982.1_1	4,4	892,493	11889,6045	447,201	5791,4030	0,0	-1,-1
ENSG00000200975.1	chr1	8266494	8266657	-	164	0	0	0	0	0	0	0	0	0	0	0	0	RNU1-7P	ENSG00000200975.1	1	ENST00000364105.1	1	163	0	163	0	0	3
ENSG00000233645.1_4	chr1	8278250	8280589	-	477	0	0	0	0	0	0	0	0	0	0	0	0	RP11-431K24.4	ENSG00000233645.1_4	1	ENST00000424689.1_1	2	475	1864	343	1864	0	4
ENSG00000265414.1	chr1	8335184	8335438	-	255	1	0	0	0	0	0	0	0	3	0	0	0	RN7SL729P	ENSG00000265414.1	1	ENST00000585092.1	1	254	0	254	0	0	3
ENSG00000251977.1	chr1	8352217	8352323	-	107	0	0	0	0	0	0	0	0	0	0	0	0	RNU6-991P	ENSG00000251977.1	1	ENST00000516168.1	1	106	0	106	0	0	3
ENSG00000162426.14_3	chr1	8377886	8404227	+	2888	0	0	1	0	0	0	0	0	0	1	2	0	SLC45A1	ENSG00000162426.14_3	4	ENST00000471889.5_2,ENST00000289877.8_2,ENST00000497660.5_1,ENST00000481265.1_1	9,8,5,3	2775,2393,1742,691	23564,17444,12277,4990	727,727,798,508	6120,4501,4501,4501	2340,2239,0,0	1,1,-1,-1
ENSG00000252254.1	chr1	8388127	8388239	+	113	0	0	0	0	0	0	0	0	0	0	0	0	Y_RNA	ENSG00000252254.1	1	ENST00000516445.1	1	112	0	112	0	0	-1
ENSG00000142599.17_4	chr1	8412457	8877702	-	11503	1560	1376	1689	1133	1273	1113	1733	7	42	2634	1734	1700	RERE	ENSG00000142599.17_4	18	ENST00000337907.7_3,ENST00000377464.5_3,ENST00000467350.1_1,ENST00000400907.6_3,ENST00000476556.5_2,ENST00000400908.6_3,ENST00000505225.1_3,ENST00000464367.1_2,ENST00000488215.5_2,ENST00000460659.5_1,ENST00000492766.5_1,ENST00000465125.1_1,ENST00000464972.5_1,ENST00000480342.5_1,ENST00000507012.1_1,ENST00000469251.1_1,ENST00000514428.1_3,ENST00000468247.1_1	24,17,2,15,13,23,5,2,5,3,4,3,7,11,3,4,3,2	8002,6716,408,2958,4585,5767,528,637,957,451,363,393,736,2699,415,351,270,412	457065,166816,1765,299469,64988,457249,6795,491,60199,57113,57427,57961,102500,286168,30472,49266,67634,46614	2723,2714,269,1177,1378,1378,161,545,424,252,105,219,268,1053,280,105,105,248	135963,56753,1765,57038,56753,160719,5214,491,56753,56753,56753,56753,43118,96990,28229,33262,66787,46614	0,0,0,0,0,0,0,0,0,0,0,0,0,0,0,0,0,0	24,17,4,15,13,23,7,4,7,5,6,5,9,13,5,6,5,4
ENSG00000232912.5_4	chr1	8484705	8494898	+	702	0	2	3	0	1	0	0	0	0	1	1	1	RP5-1115A15.1	ENSG00000232912.5_4	2	ENST00000449895.5_1,ENST00000444276.1_1	4,3	512,436	9681,3967	205,214	4661,2728	0,0	-1,-1
ENSG00000221083.1	chr1	8571854	8571978	-	125	3	3	6	2	1	4	3	0	0	11	3	6	SNORA77	ENSG00000221083.1	1	ENST00000408156.1	1	124	0	124	0	0	3
ENSG00000270282.1_4	chr1	8572712	8573080	+	369	0	0	0	0	0	0	0	0	0	0	0	0	RP5-1115A15.2	ENSG00000270282.1_4	1	ENST00000605785.1_1	1	368	0	368	0	0	-1
ENSG00000234619.1_3	chr1	8810489	8811146	+	658	1	0	0	0	0	0	0	0	0	0	0	1	RP4-633I8.1	ENSG00000234619.1_3	1	ENST00000437586.1_1	1	657	0	657	0	0	-1
ENSG00000224315.2_3	chr1	8846270	8846972	-	703	46	37	47	39	53	29	44	0	1095	107	77	92	RP4-633I8.2	ENSG00000224315.2_3	1	ENST00000428803.2_1	1	702	0	702	0	0	3
ENSG00000222511.1	chr1	8856633	8856731	-	99	18	7	16	10	13	14	20	0	0	50	46	42	Y_RNA	ENSG00000222511.1	1	ENST00000410579.1	1	98	0	98	0	0	3
ENSG00000226545.1_4	chr1	8858534	8859565	+	415	0	0	0	0	0	0	0	0	0	0	0	0	RP4-633I8.3	ENSG00000226545.1_4	1	ENST00000445254.1_1	2	413	618	216	618	0	-1
ENSG00000228423.2_5	chr1	8865919	8867110	-	353	44	41	54	34	48	32	65	0	928	149	88	121	RP4-633I8.4	ENSG00000228423.2_5	1	ENST00000433876.2_1	2	351	840	272	840	0	4
ENSG00000229716.2_3	chr1	8891066	8891434	+	369	0	0	0	0	0	0	0	0	1	0	0	0	RP11-185B14.1	ENSG00000229716.2_3	1	ENST00000436229.2_1	1	368	0	368	0	0	-1
ENSG00000074800.14_4	chr1	8921059	8939309	-	5276	40594	58778	46548	45954	34641	33589	27868	141	180	31675	42969	43121	ENO1	ENSG00000074800.14_4	17	ENST00000646539.1_1,ENST00000464920.2_2,ENST00000234590.9_2,ENST00000647408.1_1,ENST00000645609.1_1,ENST00000645600.1_1,ENST00000497492.1_1,ENST00000646660.1_1,ENST00000646680.1_1,ENST00000646370.1_1,ENST00000646906.1_1,ENST00000646156.1_1,ENST00000643438.1_1,ENST00000489867.2_4,ENST00000486051.5_1,ENST00000492343.2_2,ENST00000414948.1_2	12,9,12,12,10,6,7,7,6,7,7,6,6,5,4,3,2	2333,2539,1767,1770,1809,599,640,574,551,563,541,616,563,632,532,1244,742	15917,8035,15917,15917,14169,5336,11266,11026,11689,10957,10308,10077,10035,10509,7984,6501,1477	670,1124,427,427,512,222,140,133,140,106,103,200,242,378,236,1039,499	3663,2395,3663,3663,3663,2395,3298,3058,3834,3663,2838,3663,2838,3895,3663,3663,1477	0,0,0,0,0,0,0,0,0,0,0,0,0,0,0,0,0	12,11,12,12,12,8,9,9,4,6,9,8,8,7,6,5,4
ENSG00000230679.1_4	chr1	8938894	8939953	+	456	9	14	13	9	7	11	6	0	0	6	11	4	RP3-477M7.3	ENSG00000230679.1_4	1	ENST00000442636.1_1	2	454	605	329	605	0	-1
ENSG00000201725.1	chr1	8943486	8943592	-	107	0	0	0	0	0	0	0	0	0	0	1	0	RNU6-304P	ENSG00000201725.1	1	ENST00000364855.1	1	106	0	106	0	0	3
ENSG00000238249.2_3	chr1	8953468	8954210	+	743	0	0	2	0	0	0	0	0	0	0	0	2	RP3-477M7.4	ENSG00000238249.2_3	1	ENST00000425872.1_1	1	742	0	742	0	0	-1
ENSG00000232208.2_4	chr1	8967452	8967803	-	352	7	1	1	0	2	3	0	0	0	11	6	2	RP3-477M7.5	ENSG00000232208.2_4	1	ENST00000424862.2_1	1	351	0	351	0	0	3
ENSG00000232663.2_4	chr1	8969801	8969963	+	163	0	0	0	0	0	0	0	0	0	0	0	0	RP3-477M7.6	ENSG00000232663.2_4	1	ENST00000431968.2_1	1	162	0	162	0	0	-1
ENSG00000131686.14_2	chr1	9005926	9035151	+	2662	0	0	0	0	0	0	0	0	2	0	1	2	CA6	ENSG00000131686.14_2	6	ENST00000549778.5_1,ENST00000476083.1_1,ENST00000480186.7_2,ENST00000377443.6_1,ENST00000377436.6_1,ENST00000377442.3_1	6,6,3,8,8,7	576,781,1490,1311,934,740	21302,28225,5279,27898,27623,28077	143,252,1228,470,179,157	7791,12945,3298,7695,7695,11172	0,0,537,919,934,740	1,-1,1,1,1,1
ENSG00000265141.1	chr1	9039637	9039933	-	297	0	0	1	0	0	0	0	0	0	0	0	0	RN7SL451P	ENSG00000265141.1	1	ENST00000583026.1	1	296	0	296	0	0	3
ENSG00000197241.3_2	chr1	9063359	9086404	-	1539	0	2	1	0	1	1	0	0	0	2	1	0	SLC2A7	ENSG00000197241.3_2	1	ENST00000400906.1_1	12	1527	21518	218	3585	0	12
ENSG00000142583.17_3	chr1	9095166	9148537	-	6693	1	2	1	0	0	2	0	0	2	4	2	3	SLC2A5	ENSG00000142583.17_3	10	ENST00000377424.8_1,ENST00000487492.1_1,ENST00000377414.7_1,ENST00000484798.5_3,ENST00000474145.5_2,ENST00000479813.5_2,ENST00000486632.5_3,ENST00000487835.5_3,ENST00000464985.5_3,ENST00000473209.1_2	12,3,5,6,6,7,7,7,6,4	4153,519,2339,678,840,751,882,748,670,451	30456,945,27185,29264,29640,30586,45811,45851,40162,11902	2682,343,1857,160,216,160,160,160,160,153	11254,623,11254,11254,11254,11254,15420,15420,15420,11254	0,0,0,0,0,0,0,0,0,0	12,5,5,8,8,9,9,9,8,6
ENSG00000252404.1	chr1	9142755	9142938	+	184	0	0	0	0	0	0	0	0	0	0	0	0	SCARNA16	ENSG00000252404.1	1	ENST00000516595.1	1	183	0	183	0	0	-1
ENSG00000180758.11_3	chr1	9160364	9189229	-	5372	1105	1099	690	517	959	862	739	1	349	387	1019	1037	GPR157	ENSG00000180758.11_3	3	ENST00000377411.4_1,ENST00000465853.1_2,ENST00000466131.1_1	4,2,2	5261,196,456	23604,6642,17156	4329,102,320	17156,6642,17156	0,0,0	4,4,4
ENSG00000228526.7_4	chr1	9208070	9258965	-	8702	1188	878	1440	1033	1059	1078	1106	2	3125	2013	2634	2620	MIR34AHG	ENSG00000228526.7_4	4	ENST00000635687.1_1,ENST00000635405.2_2,ENST00000437157.3_1,ENST00000632503.1_2	2,2,2,1	4209,4455,407,1763	30172,14617,1336,0	3824,2664,288,1763	30172,14617,1336,0	0,0,0,0	4,4,4,3
ENSG00000207865.1	chr1	9211727	9211836	-	110	24	31	33	22	25	24	33	0	1	49	62	49	MIR34A	ENSG00000207865.1	1	ENST00000385130.1	1	109	0	109	0	0	3
ENSG00000234546.3_3	chr1	9242063	9256343	+	1662	25	24	36	30	20	15	31	0	0	22	31	18	RP3-510D11.2	ENSG00000234546.3_3	3	ENST00000635271.1_1,ENST00000412639.2_1,ENST00000634966.1_1	3,3,2	885,982,650	13395,8903,269	399,696,574	12078,7586,269	0,0,0	-1,-1,-1
ENSG00000049239.12_3	chr1	9294834	9331396	+	9321	1624	1366	1455	1033	1312	1116	1969	11	956	3023	1871	1757	H6PD	ENSG00000049239.12_3	3	ENST00000377403.6_2,ENST00000602477.1_2,ENST00000495451.1_1	5,5,2	9141,5585,2699	27421,22469,3108	7828,4389,2507	14976,14976,3108	2372,2404,0	2,1,-1
ENSG00000252841.1	chr1	9338450	9338592	+	143	1	1	0	0	0	0	0	0	0	1	1	1	Z98044.1	ENSG00000252841.1	1	ENST00000517032.1	1	142	0	142	0	0	-1
ENSG00000171621.13_2	chr1	9352939	9429591	+	3403	463	498	234	177	609	618	251	2	8	387	292	295	SPSB1	ENSG00000171621.13_2	4	ENST00000328089.10_1,ENST00000450402.1_1,ENST00000357898.3_1,ENST00000377399.2_1	3,2,3,2	3117,820,1436,1005	73535,61149,14996,10863	2084,754,842,878	62672,61149,10863,10863	820,0,820,820	2,2,2,1
ENSG00000284652.1_2	chr1	9481157	9482921	-	1765	1	0	0	0	0	0	0	0	0	0	0	0	CTD-2510L9.2	ENSG00000284652.1_2	1	ENST00000641006.1_1	1	1764	0	1764	0	0	3
ENSG00000284693.1_2	chr1	9485153	9500623	-	2623	1	3	3	5	1	2	2	0	1	4	1	2	CTD-2510L9.1	ENSG00000284693.1_2	3	ENST00000641325.1_1,ENST00000641940.1_1,ENST00000641507.1_1	2,2,2	2440,837,480	1541,13078,1461	2287,732,406	1541,13078,1461	0,0,0	4,4,4
ENSG00000252956.1	chr1	9497728	9497837	-	110	0	1	0	0	0	0	0	0	0	1	0	2	RNA5SP40	ENSG00000252956.1	1	ENST00000517147.1	1	109	0	109	0	0	3
ENSG00000235263.1_4	chr1	9561151	9563530	-	708	8	10	5	4	17	13	12	0	1	16	20	17	RP13-392I16.1	ENSG00000235263.1_4	1	ENST00000441033.1_1	2	706	1673	456	1673	0	4
ENSG00000171612.6_3	chr1	9599541	9645237	+	3854	1269	1533	3678	3384	2422	2262	3239	6	609	1500	2832	2810	SLC25A33	ENSG00000171612.6_3	1	ENST00000302692.6_1	7	3847	41849	2880	13878	959	1
ENSG00000231181.1_4	chr1	9636485	9637043	+	559	72	77	94	82	59	46	117	0	0	58	81	78	RP13-15M17.1	ENSG00000231181.1_4	1	ENST00000435277.1_1	1	558	0	558	0	0	-1
ENSG00000188807.12_3	chr1	9648980	9674931	+	6966	340	259	641	402	368	294	481	3	19	501	497	503	TMEM201	ENSG00000188807.12_3	5	ENST00000340305.9_2,ENST00000340381.10_2,ENST00000416541.5_1,ENST00000510900.1_1,ENST00000508400.1_1	6,11,8,2,6	3845,3765,3439,552,887	12187,22162,14537,919,4632	2885,1863,1887,424,299	6847,6847,5285,919,2051	1173,1990,1649,0,494	1,1,-1,-1,-1
ENSG00000171608.15_2	chr1	9711790	9789172	+	6332	676	732	562	327	750	677	575	4	27	874	846	859	PIK3CD	ENSG00000171608.15_2	8	ENST00000536656.5_1,ENST00000628140.2_1,ENST00000377346.8_1,ENST00000484851.1_1,ENST00000543390.2_1,ENST00000361110.6_1,ENST00000481137.1_1,ENST00000479223.1_1	25,24,24,3,24,23,2,3	5458,5459,5179,512,3479,3485,384,536	71924,71923,71995,3258,13550,13549,80,769	2205,2205,2010,271,318,323,314,343	39665,39665,39665,3154,4945,4945,80,429	3184,3185,3113,0,3184,3185,0,0	3,3,3,-1,2,2,-1,-1
ENSG00000179840.5_4	chr1	9712668	9714644	-	1823	0	0	0	0	0	0	0	0	0	0	0	0	C1orf200	ENSG00000179840.5_4	1	ENST00000377320.3_1	2	1821	155	1433	155	0	4
ENSG00000233268.3_4	chr1	9720886	9722684	-	421	0	0	0	0	0	0	0	0	0	0	0	0	RP11-558F24.2	ENSG00000233268.3_4	1	ENST00000426570.3_1	2	419	1379	329	1379	0	4
ENSG00000231789.2_4	chr1	9732484	9747613	-	939	45	67	57	47	38	38	45	0	1	44	51	67	RP11-558F24.4	ENSG00000231789.2_4	1	ENST00000415330.2_1	3	936	14193	423	7993	0	5
ENSG00000171603.16_2	chr1	9789084	9884584	-	5559	2828	2013	2900	1844	2122	1855	2059	9	30	2322	2124	2278	CLSTN1	ENSG00000171603.16_2	5	ENST00000377298.8_1,ENST00000477264.1_1,ENST00000435891.5_1,ENST00000361311.4_1,ENST00000464286.1_1	19,4,14,18,2	5202,2165,3815,4629,561	90298,2293,18738,90327,118	1679,1677,1677,1677,403	50249,1505,5052,50249,118	0,0,1482,0,0	19,6,14,18,4
ENSG00000271264.1_3	chr1	9840880	9841298	+	246	0	0	0	0	0	0	0	0	0	0	0	0	RP11-558F24.6	ENSG00000271264.1_3	1	ENST00000603781.1_1	2	244	174	166	174	0	-1
ENSG00000280113.2_3	chr1	9886347	9888329	-	1983	4	1	6	0	0	5	1	0	1	3	2	0	RP11-84A14.7	ENSG00000280113.2_3	2	ENST00000639753.1_1,ENST00000623863.1_1	1,1	1982,648	0,0	1982,648	0,0	0,0	3,3
ENSG00000178585.14_2	chr1	9908334	9970394	-	3339	1736	1936	1941	1696	1717	1729	1057	4	13	1063	1516	1468	CTNNBIP1	ENSG00000178585.14_2	4	ENST00000377263.5_1,ENST00000400904.7_1,ENST00000377258.5_1,ENST00000377256.1_1	6,5,5,5	2994,1201,847,446	58993,59026,41940,27071	2500,667,326,119	26357,32106,20411,20411	0,0,0,0	6,5,5,5
ENSG00000223989.1_4	chr1	9908376	9910212	+	424	0	0	1	0	0	0	0	0	0	0	0	0	RP11-84A14.5	ENSG00000223989.1_4	1	ENST00000454104.1_1	3	421	1415	168	903	0	-1
ENSG00000162441.11_2	chr1	9982171	10003465	-	2794	1100	1535	1394	1255	1457	1325	1329	3	5	1159	1572	1671	LZIC	ENSG00000162441.11_2	5	ENST00000488540.5_1,ENST00000377223.5_1,ENST00000400903.6_1,ENST00000377213.1_1,ENST00000471853.1_1	5,8,7,8,2	647,2273,1398,937,485	12860,12117,11650,12217,1434	245,1518,737,204,289	9533,5997,5997,5997,1434	144,0,0,0,0	5,8,7,8,4
ENSG00000228150.1_5	chr1	10002981	10010032	+	440	25	19	26	20	13	10	14	0	9	17	25	20	RP11-84A14.4	ENSG00000228150.1_5	1	ENST00000445884.1_1	2	438	6613	336	6613	0	-1
ENSG00000173614.13_3	chr1	10003486	10045559	+	4610	376	372	491	479	500	592	401	1	829	571	633	630	NMNAT1	ENSG00000173614.13_3	5	ENST00000403197.5_1,ENST00000377205.5_1,ENST00000462686.1_1,ENST00000492735.1_1,ENST00000496751.1_1	5,5,6,2,2	1089,3776,1812,512,483	37249,38294,38428,28503,3966	510,3197,665,485,365	28503,28503,28503,28503,3966	479,836,836,0,125	2,2,2,-1,-1
ENSG00000202415.1	chr1	10007376	10007694	+	319	24	22	27	20	36	23	14	0	2	34	43	37	RN7SKP269	ENSG00000202415.1	1	ENST00000365545.1	1	318	0	318	0	0	-1
ENSG00000283611.2_4	chr1	10010630	10020845	-	444	0	0	0	0	0	0	0	0	0	0	0	0	RP11-84A14.6	ENSG00000283611.2_4	1	ENST00000636827.2_2	5	439	9776	130	4799	0	7
ENSG00000265521.1	chr1	10027439	10027516	+	78	6	0	7	1	7	5	1	0	0	11	9	11	MIR5697	ENSG00000265521.1	1	ENST00000578045.1	1	77	0	77	0	0	-1
ENSG00000241326.1_5	chr1	10043199	10044626	+	436	51	44	74	74	74	90	53	0	332	81	111	109	RP11-807G9.2	ENSG00000241326.1_5	1	ENST00000413148.1_1	2	434	993	285	993	0	-1
ENSG00000162444.11_2	chr1	10057264	10076078	+	861	5	14	19	18	8	6	14	0	1	17	29	19	RBP7	ENSG00000162444.11_2	2	ENST00000315901.4_1,ENST00000294435.7_1	5,4	856,632	17958,18172	238,238	7508,10239	178,401	1,1
ENSG00000225786.2	chr1	10078085	10078592	-	237	0	0	0	0	0	0	0	0	0	1	0	0	AL590639.1	ENSG00000225786.2	1	ENST00000450492.2	3	234	273	142	268	0	5
ENSG00000130939.18_3	chr1	10092890	10241297	+	9128	2107	2192	2372	1629	2975	2592	2220	7	23	1880	2344	2589	UBE4B	ENSG00000130939.18_3	10	ENST00000253251.12_1,ENST00000377153.5_1,ENST00000343090.10_1,ENST00000462658.1_1,ENST00000475795.5_1,ENST00000470736.1_1,ENST00000466379.1_1,ENST00000488228.1_1,ENST00000487244.5_1,ENST00000465408.1_1	27,3,28,2,9,8,6,5,4,3	4745,1270,5239,571,862,819,2293,555,814,352	142790,38574,142404,1753,24287,22178,14967,12280,8246,582	862,664,1344,334,141,198,1109,144,373,151	38334,38334,38334,1753,10085,7735,9754,4958,7315,333	3495,300,3881,0,0,0,0,292,0,0	1,1,1,-1,-1,-1,-1,-1,-1,-1
ENSG00000224340.1_4	chr1	10114503	10114839	-	337	0	0	0	0	0	0	0	0	0	0	0	0	RP11-496H15.2	ENSG00000224340.1_4	1	ENST00000456484.1_1	1	336	0	336	0	0	3
ENSG00000233623.2_3	chr1	10118729	10119706	+	680	12	3	12	10	21	21	10	0	6	18	18	20	RP11-496H15.3	ENSG00000233623.2_3	1	ENST00000416729.2_1	2	678	299	406	299	0	-1
ENSG00000201746.1	chr1	10223326	10223432	+	107	1	1	2	0	0	0	1	0	0	1	1	3	RNU6-828P	ENSG00000201746.1	1	ENST00000364876.1	1	106	0	106	0	0	-1
ENSG00000054523.17_4	chr1	10270863	10441661	+	17720	5827	6039	5439	3446	7571	6181	6426	12	532	6970	6408	6433	KIF1B	ENSG00000054523.17_4	13	ENST00000377093.8_1,ENST00000263934.10_2,ENST00000377086.5_2,ENST00000377083.5_1,ENST00000377081.5_1,ENST00000620295.2_1,ENST00000622724.3_1,ENST00000495136.1_1,ENST00000497835.1_1,ENST00000465635.5_1,ENST00000483340.1_1,ENST00000635499.1_2,ENST00000470616.1_1	21,47,49,21,48,47,48,2,3,7,6,13,2	7544,6769,10620,5864,8698,8577,8540,641,449,752,833,2085,517	90248,160363,159367,70129,140649,140690,140727,3184,9435,16298,15370,22440,2819	5434,1392,5058,3594,3258,3257,3257,580,287,142,332,644,482	23813,23813,23813,23813,23813,23813,23813,3184,8549,8193,8193,5533,2819	3442,5267,5403,3442,5424,5383,5346,0,0,0,0,1483,0	2,2,2,2,1,1,1,-1,-1,-1,-1,-1,-1
ENSG00000264881.1	chr1	10287776	10287861	+	86	0	0	0	2	4	3	0	0	42	6	5	2	MIR1273D	ENSG00000264881.1	1	ENST00000577266.1	1	85	0	85	0	0	-1
ENSG00000199562.1	chr1	10359024	10359130	+	107	4	3	6	4	16	9	2	0	0	15	7	12	RNU6-37P	ENSG00000199562.1	1	ENST00000362692.1	1	106	0	106	0	0	-1
ENSG00000264501.1	chr1	10366523	10366813	+	291	28	27	33	35	61	48	40	0	0	45	50	57	RN7SL731P	ENSG00000264501.1	1	ENST00000584329.1	1	290	0	290	0	0	-1
ENSG00000284735.1_2	chr1	10441964	10447207	-	2380	2	1	4	2	3	2	2	0	29	2	2	1	RP4-736L20.4	ENSG00000284735.1_2	3	ENST00000641495.1_1,ENST00000641619.1_1,ENST00000641117.1_1	2,2,3	397,915,1388	4238,212,1133	302,869,760	4238,212,1132	0,0,0	4,4,5
ENSG00000265945.1	chr1	10450059	10450353	+	295	4	2	4	3	11	10	5	0	104	5	3	5	RN7SL721P	ENSG00000265945.1	1	ENST00000579866.1	1	294	0	294	0	0	-1
ENSG00000284642.1_2	chr1	10455473	10457489	+	1477	46	21	37	17	38	45	29	0	43	31	27	32	RP4-736L20.5	ENSG00000284642.1_2	4	ENST00000641011.1_1,ENST00000641335.1_1,ENST00000641456.1_1,ENST00000641062.1_1	2,2,2,2	297,1367,1140,668	328,447,453,457	190,758,587,530	328,447,453,457	0,0,0,0	-1,-1,-1,-1
ENSG00000142657.20_3	chr1	10458649	10480201	+	2966	5594	7696	7439	4341	5866	3699	6318	15	56	5030	8839	9813	PGD	ENSG00000142657.20_3	10	ENST00000491493.5_3,ENST00000487775.1_1,ENST00000477958.5_1,ENST00000270776.12_1,ENST00000483936.5_1,ENST00000465632.5_1,ENST00000460189.1_1,ENST00000493288.1_1,ENST00000498356.1_1,ENST00000496718.1_1	7,2,5,13,6,5,6,2,6,2	799,460,503,1872,674,637,761,474,784,504	12161,504,4700,19192,17723,8005,12858,3736,3754,492	179,379,196,514,189,206,189,417,200,391	3792,504,2499,3792,11714,3792,3792,3736,1595,492	0,0,189,1439,0,0,0,0,0,0	2,-1,1,1,1,1,-1,-1,-1,-1
ENSG00000271989.1_4	chr1	10489938	10490734	-	797	4	9	12	9	5	3	3	0	0	3	3	7	RP4-736L20.3	ENSG00000271989.1_4	1	ENST00000607572.1_2	1	796	0	796	0	0	3
ENSG00000251503.8_5	chr1	10490159	10512210	+	2244	168	231	321	295	209	183	315	0	2	235	266	271	APITD1-CORT	ENSG00000251503.8_5	5	ENST00000400900.6_3,ENST00000470413.6_3,ENST00000602787.6_3,ENST00000602296.6_3,ENST00000465026.1_3	5,4,6,4,3	1464,622,565,1322,491	20587,20653,20411,19877,19910	776,282,176,626,282	10964,16687,8936,10964,10964	490,230,412,428,148	1,1,1,1,1
ENSG00000175279.21_3	chr1	10490500	10502866	+	1739	175	231	342	307	221	194	326	0	2	258	290	295	CENPS	ENSG00000175279.21_3	5	ENST00000309048.7_1,ENST00000602486.1_1,ENST00000477755.1_1,ENST00000462462.1_1,ENST00000464507.1_1	5,2,5,3,2	891,310,909,581,682	11475,308,10642,10798,1852	544,254,618,278,392	5657,308,5657,8946,1852	412,0,234,148,0	1,-1,1,1,-1
ENSG00000241563.3_3	chr1	10509776	10511959	+	1130	29	30	23	25	17	22	34	0	0	22	17	20	CORT	ENSG00000241563.3_3	1	ENST00000377049.3_1	2	1128	1055	603	1055	316	1
ENSG00000160049.11_2	chr1	10516579	10532583	-	6622	1328	1217	2275	1828	1488	1659	1724	9	1707	1389	2258	2196	DFFA	ENSG00000160049.11_2	3	ENST00000377038.7_1,ENST00000476658.5_1,ENST00000377036.2_1	6,5,5	6026,739,1398	9978,10097,8622	5180,221,741	3570,3981,3570	0,0,0	6,4,5
ENSG00000203469.2_4	chr1	10518612	10519395	+	467	0	0	0	0	0	0	0	0	1	1	0	0	RP5-1113E3.3	ENSG00000203469.2_4	1	ENST00000424487.1_1	2	465	318	248	318	0	-1
ENSG00000142655.12_2	chr1	10532345	10690815	+	2995	394	356	428	327	361	319	367	2	10	189	201	206	PEX14	ENSG00000142655.12_2	4	ENST00000472851.1_1,ENST00000356607.8_1,ENST00000491661.2_1,ENST00000492696.1_1	4,9,6,2	801,1976,631,248	63483,153895,147673,153	359,1227,267,172	22694,62941,62941,153	0,1125,477,0	-1,1,-1,-1
ENSG00000243267.2	chr1	10676893	10677170	+	278	0	1	2	1	0	0	1	0	0	0	0	3	RN7SL614P	ENSG00000243267.2	1	ENST00000461850.2	1	277	0	277	0	0	-1
ENSG00000130940.14_2	chr1	10696661	10856707	-	11336	162	208	192	132	197	143	248	0	32	336	245	224	CASZ1	ENSG00000130940.14_2	9	ENST00000377022.7_1,ENST00000478524.1_1,ENST00000447850.3_1,ENST00000344008.5_1,ENST00000490176.1_1,ENST00000496432.6_1,ENST00000492173.1_1,ENST00000478728.2_1,ENST00000472814.1_1	21,2,4,16,2,9,2,3,2	7915,335,691,4389,430,3270,2265,645,449	152129,1307,2303,145048,186,38225,1126,32530,930	3455,287,240,926,271,1234,1696,488,366	55157,1307,1606,55157,186,28303,1126,28303,930	0,0,0,0,0,0,0,0,0	21,4,6,16,4,11,4,5,4
ENSG00000272078.1_4	chr1	10699298	10714390	+	7923	0	0	1	0	0	0	0	0	0	1	0	0	RP4-734G22.3	ENSG00000272078.1_4	1	ENST00000606802.1_1	2	7921	7171	7085	7171	0	-1
ENSG00000225158.2_3	chr1	10955818	10956055	+	238	0	0	0	0	0	0	0	0	1	0	0	0	RP11-340B24.3	ENSG00000225158.2_3	1	ENST00000450782.2_1	1	237	0	237	0	0	-1
ENSG00000175262.14_4	chr1	11006528	11042094	-	3573	0	0	0	0	0	0	1	0	6	6	2	5	C1orf127	ENSG00000175262.14_4	5	ENST00000476357.1_1,ENST00000418570.6_4,ENST00000377004.8_2,ENST00000468348.1_4,ENST00000520253.1_4	2,8,13,2,12	2375,2257,2748,338,2347	905,15471,32816,1057,27138	2108,1201,1201,227,1201	905,5376,6067,1057,6067	0,290,0,133,33	4,7,12,1,11
ENSG00000215785.2_3	chr1	11051035	11051854	-	494	0	0	0	0	2	0	1	0	0	0	0	0	CFLP6	ENSG00000215785.2_3	1	ENST00000400899.2_1	2	492	327	379	327	0	4
ENSG00000264181.1	chr1	11058233	11058320	-	88	0	0	0	0	0	0	0	0	1	0	0	0	AL713997.1	ENSG00000264181.1	1	ENST00000582090.1	1	87	0	87	0	0	3
ENSG00000207213.1	chr1	11059919	11060002	-	84	0	0	0	0	0	0	0	0	0	0	0	0	Y_RNA	ENSG00000207213.1	1	ENST00000384484.1	1	83	0	83	0	0	3
ENSG00000120948.16_4	chr1	11072401	11086477	+	6071	4032	6926	5600	4668	4038	3595	3987	8	72	3214	4512	4389	TARDBP	ENSG00000120948.16_4	31	ENST00000473118.5_3,ENST00000240185.7_1,ENST00000639083.1_1,ENST00000639599.1_1,ENST00000629725.2_1,ENST00000439080.6_1,ENST00000613864.4_1,ENST00000476201.5_3,ENST00000472476.5_1,ENST00000621715.4_3,ENST00000315091.7_1,ENST00000473869.5_1,ENST00000638264.1_1,ENST00000621790.4_1,ENST00000616545.4_1,ENST00000622057.4_3,ENST00000617172.4_3,ENST00000618606.1_1,ENST00000611963.4_3,ENST00000620632.4_3…	5,6,6,8,7,5,4,6,7,5,6,7,5,6,6,5,5,2,6,5,5,5,4,5,3,2,3,2,4,2,2	696,5361,2263,1275,1024,1383,580,923,994,811,1829,1939,769,1002,914,701,975,582,733,701,677,558,511,404,654,990,926,377,688,432,788	7449,8659,8922,10483,9602,8822,5219,7012,8528,8829,8638,9364,8154,8611,8699,5727,5750,1726,6494,4562,4727,4632,3239,4216,2259,735,1748,1781,1853,397,775	249,4296,1485,249,249,734,249,249,249,249,990,955,298,237,237,170,397,453,170,176,170,176,173,136,407,781,511,284,271,344,406	2879,2879,2879,2879,2879,4768,2879,1726,2158,3251,2879,2879,3638,2879,2879,1726,1726,1726,1726,1556,1556,1556,1525,1525,1781,735,973,1781,775,397,775	0,1240,1240,882,891,253,0,0,241,0,882,891,0,909,900,597,633,0,523,444,411,380,233,193,346,106,0,0,50,0,0	2,2,2,2,2,2,-1,2,2,2,1,1,1,1,1,-1,-1,-1,-1,-1,-1,-1,-1,-1,-1,-1,-1,-1,-1,-1,-1
ENSG00000277726.4_5	chr1	11072719	11090585	+	2205	2118	3407	2834	2459	2056	1821	2091	2	41	1697	2329	2222	RP4-635E18.9	ENSG00000277726.4_5	5	ENST00000614757.4_4,ENST00000611136.4_4,ENST00000612542.1_4,ENST00000622108.1_4,ENST00000620028.1_1	10,5,3,4,2	1783,695,551,641,761	16083,9229,7831,6658,4971	349,251,347,318,415	4971,4971,4971,4479,4971	891,265,182,50,0	2,-1,-1,-1,-1
ENSG00000009724.16_2	chr1	11086580	11107290	-	4251	279	279	258	196	226	200	245	1	99	315	306	247	MASP2	ENSG00000009724.16_2	4	ENST00000400897.7_1,ENST00000478645.1_1,ENST00000480221.1_1,ENST00000400898.3_1	11,2,3,5	2428,441,2187,721	18272,5064,242,1714	1125,323,1935,228	5064,5064,158,1017	0,0,0,0	11,4,5,5
ENSG00000271895.2_5	chr1	11089716	11090585	+	870	91	102	100	81	77	56	128	0	34	71	82	85	RP4-635E18.8	ENSG00000271895.2_5	2	ENST00000607145.1_2,ENST00000612387.1_1	1,2	869,649	0,121	869,626	0,121	0,0	-1,-1
ENSG00000116649.9_3	chr1	11114641	11120081	-	1898	1097	1298	1564	788	1126	747	968	1	51	642	733	846	SRM	ENSG00000116649.9_3	6	ENST00000475189.1_1,ENST00000376957.6_1,ENST00000490101.1_3,ENST00000465788.1_3,ENST00000459997.1_1,ENST00000487300.1_1	2,8,2,3,5,3	543,1258,459,399,726,608	77,4177,697,2463,3283,2376	301,296,420,163,243,461	77,2043,697,1953,2043,2043	0,0,213,0,0,0	4,8,2,5,2,5
ENSG00000171824.13_3	chr1	11126675	11159938	-	6003	2337	2659	3132	2688	2480	2461	2508	9	413	2278	3833	3897	EXOSC10	ENSG00000171824.13_3	11	ENST00000304457.11_2,ENST00000376936.8_2,ENST00000474216.5_1,ENST00000490565.1_1,ENST00000469634.5_1,ENST00000478271.1_1,ENST00000470611.5_1,ENST00000498576.1_1,ENST00000472078.1_1,ENST00000485606.1_1,ENST00000460196.1_1	24,25,13,3,3,4,5,2,2,3,5	2697,2783,1994,418,2358,604,396,484,410,456,617	30554,30480,12602,1821,2023,3137,5116,158,677,1466,7734	190,190,809,279,2126,308,113,434,358,211,136	4570,4570,2516,1260,1170,1170,2516,158,677,1296,3819	0,0,0,0,0,0,0,0,0,0,0	24,25,15,5,5,6,7,4,4,5,4
ENSG00000226849.1_5	chr1	11128528	11133154	+	2682	2	2	8	3	3	2	5	0	0	7	8	7	RP4-635E18.7	ENSG00000226849.1_5	1	ENST00000452378.1_1	2	2680	1946	2438	1946	0	-1
ENSG00000230337.1_4	chr1	11159732	11162157	+	536	5	11	5	7	6	10	6	0	1	11	12	9	RP4-635E18.6	ENSG00000230337.1_4	2	ENST00000447600.1_1,ENST00000435388.1_1	2,2	485,438	1891,1987	250,299	1891,1987	0,0	-1,-1
ENSG00000198793.12_3	chr1	11166592	11322564	-	12119	4693	4851	4132	2813	4530	4032	3895	10	31	5919	5177	5463	MTOR	ENSG00000198793.12_3	7	ENST00000376838.5_2,ENST00000361445.8_2,ENST00000473471.5_1,ENST00000490931.1_1,ENST00000455339.1_1,ENST00000495435.1_1,ENST00000476768.1_1	20,58,6,9,6,5,2	3997,8619,856,1102,688,2351,608	21026,147353,6488,7118,5672,11080,98	1029,965,311,239,267,1603,481	4160,31741,3123,1785,3123,4990,98	0,0,0,0,0,0,0	20,58,8,11,8,7,4
ENSG00000225602.5_4	chr1	11203955	11209594	+	763	0	0	0	0	0	0	0	0	0	0	0	0	RP11-99P18.1	ENSG00000225602.5_4	2	ENST00000445982.5_1,ENST00000420480.1_1	4,4	701,669	4938,4444	267,267	3991,3991	0,0	-1,-1
ENSG00000253086.1	chr1	11212407	11212509	+	103	0	0	0	0	0	0	0	0	0	0	0	0	RNU6-537P	ENSG00000253086.1	1	ENST00000517277.1	1	102	0	102	0	0	-1
ENSG00000271794.1	chr1	11229564	11229670	-	107	2	4	4	1	6	1	3	0	0	4	6	3	snoU13	ENSG00000271794.1	1	ENST00000607349.1	1	106	0	106	0	0	3
ENSG00000171819.4_2	chr1	11249398	11256038	+	2238	0	0	0	0	0	0	0	1	0	0	0	0	ANGPTL7	ENSG00000171819.4_2	2	ENST00000376819.3_1,ENST00000476934.1_1	5,3	2233,604	4407,947	1127,324	2315,752	1036,0	1,-1
ENSG00000207451.1	chr1	11286311	11286417	+	107	0	0	0	0	0	0	0	0	0	0	0	0	RNU6-291P	ENSG00000207451.1	1	ENST00000384720.1	1	106	0	106	0	0	-1
ENSG00000238173.1_3	chr1	11293020	11293169	+	150	0	0	0	0	0	0	0	0	0	0	0	0	RP4-647M16.1	ENSG00000238173.1_3	1	ENST00000448289.1_1	1	149	0	149	0	0	-1
ENSG00000120942.13_3	chr1	11333263	11356106	+	5082	959	1057	1036	782	853	774	806	3	56	897	1229	1225	UBIAD1	ENSG00000120942.13_3	4	ENST00000376810.5_1,ENST00000376804.2_2,ENST00000486588.6_2,ENST00000483738.1_2	2,2,5,3	3644,823,826,1390	11584,20813,20468,20725	2790,532,310,1176	11584,20813,11584,11584	1015,538,354,231	1,1,-1,-1
ENSG00000238199.1_3	chr1	11338673	11339408	-	437	4	0	1	0	1	1	1	0	0	0	0	3	RP4-796F18.2	ENSG00000238199.1_3	1	ENST00000433562.1_1	2	435	300	252	300	0	4
ENSG00000284646.1_2	chr1	11371791	11379150	-	742	0	0	0	0	0	0	0	0	0	0	0	0	RP4-796F18.3	ENSG00000284646.1_2	1	ENST00000641979.1_1	4	738	6621	270	4132	0	6
ENSG00000224338.2_3	chr1	11485314	11485878	-	565	0	0	0	0	0	0	0	0	0	0	0	0	RP11-149P14.1	ENSG00000224338.2_3	1	ENST00000435243.2_1	1	564	0	564	0	0	3
ENSG00000204624.7_3	chr1	11539223	11597641	+	6142	2	2	2	1	1	0	3	0	0	3	2	0	DISP3	ENSG00000204624.7_3	3	ENST00000423056.2_1,ENST00000294484.6_2,ENST00000304391.6_2	2,21,5	908,5194,1490	1886,53152,2059	702,1260,901	1886,21618,680	0,4159,802	-1,2,1
ENSG00000235643.1_3	chr1	11669588	11673412	+	1285	0	1	2	1	1	0	0	0	0	4	4	6	RP1-69M21.2	ENSG00000235643.1_3	1	ENST00000453135.1_1	3	1282	2542	582	1730	0	-1
ENSG00000284708.1_2	chr1	11683615	11703473	+	2094	0	0	0	0	0	0	0	0	0	1	0	0	RP3-330O12.5	ENSG00000284708.1_2	1	ENST00000642131.1_1	2	2092	17766	2040	17766	0	-1
ENSG00000116661.10_3	chr1	11697075	11715842	-	3416	1877	2505	1625	1624	4495	4766	3523	4	176	1751	3147	3093	FBXO2	ENSG00000116661.10_3	6	ENST00000642025.1_1,ENST00000354287.4_1,ENST00000471501.1_1,ENST00000466919.1_1,ENST00000465901.1_1,ENST00000475961.1_1	7,6,3,4,2,2	2208,1554,722,770,432,235	11544,4761,463,3553,4806,2557	736,461,346,368,287,138	7381,3485,392,2557,4806,2557	1410,0,0,0,0,0	5,6,5,6,4,4
ENSG00000132879.13_2	chr1	11714432	11723384	+	3527	447	460	514	440	411	405	615	1	55	382	579	604	FBXO44	ENSG00000132879.13_2	9	ENST00000251546.8_1,ENST00000425796.5_1,ENST00000376770.5_1,ENST00000376768.5_2,ENST00000251547.9_1,ENST00000376760.5_1,ENST00000376762.8_1,ENST00000475435.5_1,ENST00000471895.1_1	5,5,7,6,6,6,5,5,6	1891,989,3313,953,2897,816,1729,937,763	6023,3022,5157,5557,5528,5623,5652,6115,4019	1159,371,2197,294,2196,294,1161,492,182	2259,2167,2259,2259,2259,2259,2259,2259,2259	671,0,763,766,763,671,671,442,396	2,3,3,2,2,3,2,-1,-1
ENSG00000116663.10_2	chr1	11724181	11734411	+	1811	165	202	238	202	266	279	255	0	35	271	390	394	FBXO6	ENSG00000116663.10_2	3	ENST00000376753.8_1,ENST00000474239.1_1,ENST00000449067.1_1	6,4,4	1514,799,924	8716,6779,4410	739,288,415	4401,3921,2322	877,0,745	2,-1,-1
ENSG00000116670.14_3	chr1	11734537	11751707	-	3324	608	612	882	802	525	546	694	1	9	634	973	887	MAD2L2	ENSG00000116670.14_3	9	ENST00000235310.7_1,ENST00000376692.8_1,ENST00000376672.5_1,ENST00000376669.9_1,ENST00000376667.7_1,ENST00000445656.5_1,ENST00000456915.1_3,ENST00000376664.10_1,ENST00000376655.1_1	11,9,9,9,9,6,6,6,4	1849,1109,993,855,863,672,1026,852,1091	15321,5624,15959,5585,15998,4783,4448,4559,13630	399,335,291,139,196,260,569,440,742	9397,2739,10800,2739,10800,2739,2739,2739,10800	0,0,0,0,0,0,0,0,0	11,9,9,9,9,8,8,8,6
ENSG00000162490.6_2	chr1	11751786	11785914	+	7346	0	2	3	4	1	0	2	0	9	22	14	10	DRAXIN	ENSG00000162490.6_2	1	ENST00000294485.5_1	7	7339	26789	6273	14396	1044	2
ENSG00000177674.15_5	chr1	11796141	11814859	+	2435	480	523	665	632	644	581	479	0	0	522	742	785	AGTRAP	ENSG00000177674.15_5	14	ENST00000376637.7_1,ENST00000476512.5_1,ENST00000400895.6_1,ENST00000494437.1_1,ENST00000491346.5_1,ENST00000376629.8_5,ENST00000376627.6_3,ENST00000314340.9_5,ENST00000452018.6_1,ENST00000510878.1_1,ENST00000476309.5_1,ENST00000514733.5_1,ENST00000513739.5_1,ENST00000471765.1_1	4,6,6,2,6,5,7,5,6,4,5,4,4,4	1063,936,780,974,1110,1095,1048,1102,803,845,743,915,562,713	13563,13273,13412,9568,13236,13529,13377,13508,13433,13613,3865,3575,3554,6577	633,249,239,869,411,694,501,688,332,556,332,411,214,377	11205,9568,9568,9568,9568,9568,8298,9568,9568,9568,1488,1488,1467,4240	332,189,439,0,0,454,474,475,462,464,0,0,0,0	1,1,1,-1,-1,1,1,1,1,1,-1,-1,-1,-1
ENSG00000215910.7_3	chr1	11821844	11849642	+	6499	0	0	0	2	0	0	0	0	2	4	0	2	C1orf167	ENSG00000215910.7_3	7	ENST00000433342.5_2,ENST00000484153.1_1,ENST00000312793.9_2,ENST00000444493.5_2,ENST00000449278.1_2,ENST00000475041.1_1,ENST00000482358.1_1	21,9,14,10,9,2,4	4524,2557,2610,1871,1608,685,779	23273,9011,14853,8676,8053,2099,994	719,1181,419,419,419,567,315	3205,3176,3176,2179,2184,2099,524	4386,0,2471,1839,1589,0,0	1,-1,-1,-1,-1,-1,-1
ENSG00000177553.6_4	chr1	11837134	11839676	-	1868	0	0	0	0	0	0	0	0	1	0	0	0	RP11-56N19.5	ENSG00000177553.6_4	1	ENST00000376620.3_1	3	1865	677	1207	361	0	5
ENSG00000177000.11_5	chr1	11845780	11866977	-	11978	839	895	644	621	970	867	871	0	144	1148	1063	1172	MTHFR	ENSG00000177000.11_5	19	ENST00000376592.6_3,ENST00000376583.7_3,ENST00000376585.6_4,ENST00000376590.8_3,ENST00000641747.1_1,ENST00000641805.1_1,ENST00000641446.1_1,ENST00000641407.1_2,ENST00000641759.1_1,ENST00000641820.1_2,ENST00000641721.1_1,ENST00000376486.3_2,ENST00000641909.1_1,ENST00000641437.1_1,ENST00000418034.1_3,ENST00000423400.6_2,ENST00000431243.6_2,ENST00000642002.1_1,ENST00000413656.5_4	12,12,13,12,11,11,13,11,11,8,5,5,2,3,3,3,4,3,2	8366,7032,8081,7082,3216,2934,2807,2376,2443,1561,886,870,2252,1908,1031,476,1112,546,396	11324,10752,11600,13235,13473,10702,13127,10658,10517,4342,7461,8896,1482,4241,3700,1761,2983,4224,1870	5175,5168,5166,4295,1132,675,830,502,619,339,248,245,1607,1542,589,245,733,248,295	3813,3813,3813,3813,3813,3813,3813,3813,3813,1528,4864,3813,1482,2759,2218,1482,1465,2759,1870	0,0,0,0,0,0,0,0,0,0,0,0,0,0,0,0,0,0,0	12,12,13,12,3,13,11,11,13,8,7,7,4,5,5,5,6,5,4
ENSG00000011021.21_3	chr1	11866153	11903201	+	6938	2696	2328	2132	1299	2345	1777	2093	5	272	3176	2588	2665	CLCN6	ENSG00000011021.21_3	8	ENST00000312413.10_1,ENST00000346436.10_1,ENST00000376497.7_1,ENST00000376496.4_1,ENST00000376490.7_1,ENST00000376491.7_1,ENST00000376492.3_1,ENST00000494028.1_1	22,23,6,22,11,11,12,4	5609,5560,808,2900,952,916,1050,769	31438,31373,13758,29890,21003,21039,21990,3690	3000,3001,417,515,132,126,132,421	9425,8656,8656,8656,8656,8656,8656,3245	2522,2587,363,2840,0,0,0,0	1,1,1,1,-1,-1,-1,-1
ENSG00000242349.5_5	chr1	11901074	11908136	+	1427	156	106	119	88	167	123	118	1	0	216	182	167	NPPA-AS1	ENSG00000242349.5_5	2	ENST00000446542.5_1,ENST00000400892.2_1	4,3	1028,933	5639,3285	369,502	2497,1811	0,0	-1,-1
ENSG00000175206.10_2	chr1	11905766	11908402	-	1120	0	1	0	0	0	0	0	0	0	0	0	0	NPPA	ENSG00000175206.10_2	3	ENST00000376480.7_1,ENST00000610706.1_1,ENST00000376476.1_1	3,4,3	852,845,725	1222,1226,1741	326,326,326	1099,1099,1099	0,0,0	3,4,3
ENSG00000120937.8_2	chr1	11917521	11918988	-	694	3	6	0	1	2	0	1	0	0	2	5	1	NPPB	ENSG00000120937.8_2	1	ENST00000376468.3_1	3	691	776	255	543	0	3
ENSG00000224904.1_4	chr1	11937827	11940463	+	2637	0	0	0	0	0	0	0	0	0	0	0	0	RP5-934G17.6	ENSG00000224904.1_4	1	ENST00000438808.1_1	1	2636	0	2636	0	0	-1
ENSG00000199347.1	chr1	11968209	11968328	+	120	50	55	43	33	22	23	12	0	1	54	86	72	RNU5E-1	ENSG00000199347.1	1	ENST00000362477.1	1	119	0	119	0	0	-1
ENSG00000201801.1	chr1	11969865	11969984	-	120	5	9	5	5	7	5	2	0	1	13	18	14	RNU5E-4P	ENSG00000201801.1	1	ENST00000364931.1	1	119	0	119	0	0	3
ENSG00000116685.15_2	chr1	11979648	11986485	-	3281	2586	2641	3493	2956	1453	1329	2546	13	162	1500	2497	2342	KIAA2013	ENSG00000116685.15_2	3	ENST00000376572.7_1,ENST00000616327.1_1,ENST00000376576.3_1	3,4,2	2812,2166,2537	4020,4054,1716	1218,1064,1314	2304,2304,1716	0,0,0	3,4,2
ENSG00000083444.16_2	chr1	11994262	12035595	+	5320	5783	5277	4556	3408	4677	4059	3091	15	56	4031	4052	4026	PLOD1	ENSG00000083444.16_2	9	ENST00000485046.5_1,ENST00000449038.5_1,ENST00000358133.5_1,ENST00000429000.6_1,ENST00000196061.4_1,ENST00000465920.1_1,ENST00000491536.5_1,ENST00000470133.1_1,ENST00000481933.1_1	9,6,6,8,19,4,5,3,2	982,756,813,878,2921,867,634,359,2337	23433,17241,19220,22322,37863,3425,10216,1353,1656	163,163,193,163,884,592,255,163,1454	13653,9667,13121,13121,13121,2024,8192,695,1656	0,0,0,0,2165,0,0,0,0	-1,1,-1,1,1,-1,-1,-1,-1
ENSG00000116688.16_3	chr1	12040238	12073571	+	4973	3156	3994	4111	3041	2538	2360	3334	14	14	2382	3475	3542	MFN2	ENSG00000116688.16_3	6	ENST00000444836.5_1,ENST00000490079.5_1,ENST00000235329.9_1,ENST00000484391.5_1,ENST00000497302.1_1,ENST00000412236.1_2	18,4,19,2,5,4	4513,441,4520,292,640,485	28820,8494,28676,8681,11565,10196	2018,185,2012,178,184,178	8681,7051,7051,8681,7051,6575	2257,0,2257,0,0,0	2,-1,3,-1,-1,3
ENSG00000270914.1_4	chr1	12077273	12077365	-	93	0	1	0	1	0	0	0	0	0	0	0	1	RP5-1077B9.5	ENSG00000270914.1_4	1	ENST00000603287.1_1	1	92	0	92	0	0	3
ENSG00000116691.10_2	chr1	12079523	12092102	+	2821	406	406	695	593	454	439	374	1	90	703	730	748	MIIP	ENSG00000116691.10_2	7	ENST00000478749.5_1,ENST00000235332.5_1,ENST00000466860.5_1,ENST00000498685.5_1,ENST00000492256.1_1,ENST00000460823.1_1,ENST00000478299.1_1	6,10,6,6,2,6,2	773,1563,1703,1386,804,949,593	9616,11016,8050,7793,82,1980,319	347,347,901,671,420,484,317	6116,6116,6116,6116,82,1142,319	0,1158,0,0,0,0,0	-1,2,-1,-1,-1,-1,-1
ENSG00000202461.1	chr1	12084069	12084181	-	113	0	0	0	0	0	0	0	0	0	0	0	0	Y_RNA	ENSG00000202461.1	1	ENST00000365591.1	1	112	0	112	0	0	3
ENSG00000243539.2	chr1	12096799	12097071	-	273	0	0	0	0	0	0	0	0	0	0	0	0	RN7SL649P	ENSG00000243539.2	1	ENST00000496974.2	1	272	0	272	0	0	3
ENSG00000120949.14_2	chr1	12123434	12204264	+	3738	0	0	1	0	0	0	0	0	0	1	1	1	TNFRSF8	ENSG00000120949.14_2	5	ENST00000417814.3_1,ENST00000263932.6_1,ENST00000514649.5_1,ENST00000413146.6_1,ENST00000479933.2_1	14,15,14,5,4	3579,3671,2398,2358,2116	77249,77159,77249,15950,16157	1918,1920,830,1920,1920	33440,20803,33440,9352,9352	1440,1773,166,397,0	3,1,1,4,-1
ENSG00000201135.1	chr1	12137938	12138041	-	104	0	0	0	0	0	0	0	0	0	0	0	0	RNU6-777P	ENSG00000201135.1	1	ENST00000364265.1	1	103	0	103	0	0	3
ENSG00000227875.2_3	chr1	12140350	12140604	-	255	0	0	0	0	0	0	0	0	0	0	0	0	RP11-426M1.2	ENSG00000227875.2_3	1	ENST00000439324.2_1	1	254	0	254	0	0	3
ENSG00000028137.18_3	chr1	12227060	12269285	+	3766	0	1	2	0	1	1	1	0	2	4	2	0	TNFRSF1B	ENSG00000028137.18_3	4	ENST00000536782.2_1,ENST00000376259.6_1,ENST00000492361.1_1,ENST00000489921.1_1	5,10,9,3	552,3673,3574,406	24803,38552,38651,764	166,2488,2488,176	21627,21627,23788,425	463,1376,0,0	1,1,-1,-1
ENSG00000263676.1	chr1	12251770	12251830	+	61	0	0	0	0	0	0	0	0	0	0	0	0	MIR4632	ENSG00000263676.1	1	ENST00000584158.1	1	60	0	60	0	0	-1
ENSG00000225196.2_3	chr1	12280851	12281166	-	316	0	0	0	0	0	0	0	0	0	0	0	1	RP5-1118D24.2	ENSG00000225196.2_3	1	ENST00000453852.2_1	1	315	0	315	0	0	3
ENSG00000252969.1	chr1	12281205	12281328	-	124	0	0	0	0	0	0	0	0	0	0	0	0	SNORA70	ENSG00000252969.1	1	ENST00000517160.1	1	123	0	123	0	0	3
ENSG00000048707.14_4	chr1	12290089	12572099	+	20764	3093	3028	3204	2112	3064	2568	2874	8	15	2395	2905	2885	VPS13D	ENSG00000048707.14_4	20	ENST00000620676.5_2,ENST00000613099.4_2,ENST00000476169.1_1,ENST00000489961.1_1,ENST00000011700.10_2,ENST00000646917.1_1,ENST00000460333.5_1,ENST00000487188.1_1,ENST00000643711.1_1,ENST00000469054.1_1,ENST00000646411.1_1,ENST00000543710.5_1,ENST00000645371.1_1,ENST00000466732.2_2,ENST00000476045.5_1,ENST00000481484.1_1,ENST00000543766.2_1,ENST00000645148.1_1,ENST00000647414.1_1,ENST00000473099.1_1	71,70,3,4,52,34,29,12,4,5,21,20,14,4,3,3,5,3,3,2	16282,16173,472,439,10917,5335,4881,3978,578,562,4501,5654,2010,373,377,357,3831,574,551,459	265728,265802,4707,3782,222320,85016,69684,22484,5590,3822,149491,138720,124019,3261,9196,6632,43273,27848,9514,9222	2213,2213,380,227,1468,301,551,2283,246,150,1453,1632,240,134,167,167,1632,324,310,405	39174,39174,4606,2450,39174,6195,5953,3868,2323,2171,39174,39174,37103,1274,7757,5193,32250,18626,9222,9222	13098,13024,0,0,9580,4640,0,0,0,0,0,0,1156,135,0,0,133,0,0,0	2,2,-1,-1,-1,-1,-1,-1,-1,-1,-1,-1,-1,-1,-1,-1,3,-1,-1,-1
ENSG00000239149.1	chr1	12567300	12567451	+	152	4	4	3	7	12	5	3	0	0	3	4	6	SNORA59A	ENSG00000239149.1	1	ENST00000459326.1	1	151	0	151	0	0	-1
ENSG00000229484.1_4	chr1	12587766	12588462	+	438	15	16	9	12	9	1	7	0	0	15	17	16	RP5-888M10.2	ENSG00000229484.1_4	1	ENST00000416696.1_1	2	436	260	368	260	0	-1
ENSG00000162496.8_2	chr1	12627939	12677737	-	3036	1861	2043	1620	1294	1697	1655	1264	0	33	1185	1205	1190	DHRS3	ENSG00000162496.8_2	4	ENST00000616661.4_1,ENST00000464917.5_1,ENST00000430996.2_1,ENST00000482265.1_1	7,4,4,2	1715,535,822,1034	48083,47843,16753,35870	514,235,322,898	36465,35870,15305,35870	0,0,0,0	7,6,6,4
ENSG00000221340.1	chr1	12630000	12630100	-	101	5	6	9	6	7	9	9	0	0	3	3	2	RNU6ATAC18P	ENSG00000221340.1	1	ENST00000408413.1	1	100	0	100	0	0	3
ENSG00000272482.1_4	chr1	12678906	12679250	-	345	82	104	57	50	44	42	48	0	0	48	55	51	RP11-474O21.5	ENSG00000272482.1_4	1	ENST00000606790.1_1	1	344	0	344	0	0	3
ENSG00000204518.2_2	chr1	12704566	12727097	+	1575	0	0	0	0	0	1	0	0	0	1	0	0	AADACL4	ENSG00000204518.2_2	1	ENST00000376221.1_1	4	1571	20960	1125	10444	1220	1
ENSG00000226166.2_4	chr1	12752925	12753036	+	112	0	0	0	0	0	0	0	0	0	0	0	0	RP11-474O21.2	ENSG00000226166.2_4	1	ENST00000436879.2_1	1	111	0	111	0	0	-1
ENSG00000188984.11_2	chr1	12776118	12788726	+	4047	0	0	0	0	0	0	0	0	0	0	0	0	AADACL3	ENSG00000188984.11_2	2	ENST00000620146.2_1,ENST00000359318.7_1	5,6	3825,3654	8783,8567	2281,1922	4538,4241	0,1220	-1,1
ENSG00000238771.1	chr1	12799693	12799796	+	104	0	0	0	0	0	0	0	0	0	0	0	0	snoU13	ENSG00000238771.1	1	ENST00000458803.1	1	103	0	103	0	0	-1
ENSG00000157330.9_2	chr1	12806163	12823847	+	4117	0	0	0	0	0	1	0	0	0	0	0	0	C1orf158	ENSG00000157330.9_2	3	ENST00000614859.4_1,ENST00000474179.1_1,ENST00000376210.3_2	8,2,3	3540,722,692	14144,6818,14037	809,568,399	9161,6818,12754	581,0,468	1,-1,1
ENSG00000116726.4_2	chr1	12834984	12838049	+	1786	0	0	0	0	0	0	0	0	0	0	0	0	PRAMEF12	ENSG00000116726.4_2	1	ENST00000357726.4_1	3	1783	1282	895	893	1449	1
ENSG00000116721.9_2	chr1	12851546	12856777	+	2426	0	0	0	0	0	0	0	0	0	0	0	0	PRAMEF1	ENSG00000116721.9_2	2	ENST00000332296.7_1,ENST00000400814.3_1	7,3	2140,1313	3091,481	931,788	1729,469	1410,0	4,-1
ENSG00000228338.1_3	chr1	12882549	12883022	-	378	0	0	0	0	0	0	0	0	0	0	0	0	RP5-845O24.8	ENSG00000228338.1_3	1	ENST00000438401.1_1	2	376	97	253	97	0	4
ENSG00000204513.5	chr1	12884468	12891264	-	1839	0	0	0	0	0	0	0	0	0	0	0	0	PRAMEF11	ENSG00000204513.5	2	ENST00000535591.1,ENST00000437584.1	4,4	1835,1498	4961,4961	893,581	2546,2546	0,0	4,6
ENSG00000231103.2_3	chr1	12897978	12901210	-	1413	0	0	0	0	0	0	0	0	0	0	0	0	RP5-845O24.3	ENSG00000231103.2_3	1	ENST00000438176.2_1	8	1405	1827	576	1143	0	10
ENSG00000179172.9_3	chr1	12907261	12908578	-	1108	6	17	29	17	10	19	15	0	1	8	11	15	HNRNPCL1	ENSG00000179172.9_3	1	ENST00000317869.6_1	2	1106	211	1062	211	-877	2
ENSG00000120952.4_2	chr1	12916941	12921764	+	1642	0	0	0	0	0	0	0	0	0	0	0	0	PRAMEF2	ENSG00000120952.4_2	1	ENST00000240189.2_1	4	1638	3185	688	1838	1422	2
ENSG00000243073.3_2	chr1	12939045	12946025	-	1828	0	0	0	0	0	0	0	0	0	0	0	0	PRAMEF4	ENSG00000243073.3_2	1	ENST00000235349.5_1	4	1824	5156	881	2740	0	4
ENSG00000187545.5_2	chr1	12952727	12958101	-	1522	0	0	0	0	0	0	0	0	0	0	0	0	PRAMEF10	ENSG00000187545.5_2	1	ENST00000235347.4_1	7	1515	3859	578	2344	0	7
ENSG00000204510.5_2	chr1	12976430	12980302	+	1654	0	0	0	0	0	0	0	0	0	0	0	0	PRAMEF7	ENSG00000204510.5_2	2	ENST00000616979.4_1,ENST00000330881.6_1	5,4	1581,1550	2291,1305	575,575	986,915	1415,1415	2,1
ENSG00000207434.1	chr1	12982374	12982480	+	107	0	0	0	0	0	0	0	0	0	0	0	0	RNU6-1072P	ENSG00000207434.1	1	ENST00000384703.1	1	106	0	106	0	0	-1
ENSG00000234064.1_3	chr1	12985990	12988081	+	1139	0	0	0	0	0	0	0	0	0	0	0	0	RP11-450I1.2	ENSG00000234064.1_3	1	ENST00000418187.1_1	2	1137	954	579	954	0	-1
ENSG00000232423.6_3	chr1	12998302	13007406	-	1784	0	0	0	0	0	0	0	0	0	0	0	0	PRAMEF6	ENSG00000232423.6_3	2	ENST00000415464.6_2,ENST00000376189.5_2	4,4	1716,1716	5228,7388	764,764	2813,4973	0,0	4,4
ENSG00000250894.1	chr1	13012966	13015755	-	1371	0	0	0	0	0	0	0	0	0	0	0	0	RP11-450I1.4	ENSG00000250894.1	1	ENST00000504262.1	3	1368	1421	575	1024	0	5
ENSG00000204508.3	chr1	13035543	13038381	+	1446	0	0	0	0	0	0	0	0	0	0	0	0	PRAMEF22	ENSG00000204508.3	1	ENST00000376187.1	3	1443	1395	578	1008	1443	1
ENSG00000239810.2	chr1	13052394	13052998	-	605	0	0	0	0	0	0	0	0	0	0	0	0	WI2-3308P17.2	ENSG00000239810.2	1	ENST00000436041.1	1	604	0	604	0	334	1
ENSG00000270601.1	chr1	13108842	13112679	-	1426	0	0	0	0	0	0	0	0	0	0	0	0	PRAMEF23	ENSG00000270601.1	1	ENST00000605221.1	3	1423	2414	581	1747	0	5
ENSG00000250113.1	chr1	13123246	13126086	-	1422	0	0	0	0	0	0	0	0	0	0	0	0	RP13-221M14.6	ENSG00000250113.1	1	ENST00000512015.1	3	1419	1421	575	1024	0	5
ENSG00000204505.3	chr1	13140456	13145000	+	1428	0	0	0	0	0	0	0	0	0	0	0	0	PRAMEF25	ENSG00000204505.3	1	ENST00000415919.1	3	1425	3119	578	2732	0	-1
ENSG00000233336.1	chr1	13146777	13147256	+	384	0	0	0	0	0	0	0	0	0	0	0	0	RP13-221M14.2	ENSG00000233336.1	1	ENST00000437631.1	2	382	97	259	97	0	-1
ENSG00000229978.1	chr1	13162645	13165443	-	1452	0	0	0	0	0	0	0	0	0	0	0	0	RP13-221M14.3	ENSG00000229978.1	2	ENST00000448180.1,ENST00000434606.1	3,2	1449,665	1349,952	588,382	952,952	0,0	5,4
ENSG00000236179.1_3	chr1	13171871	13173157	-	891	0	0	0	0	0	0	0	0	0	0	0	0	RP13-221M14.4	ENSG00000236179.1_3	1	ENST00000458709.1_1	2	889	397	578	397	0	4
ENSG00000275774.2_2	chr1	13182968	13184326	-	1148	4	13	17	9	4	12	9	0	1	6	4	7	HNRNPCL2	ENSG00000275774.2_2	1	ENST00000621994.2_1	2	1146	212	1085	212	-877	2
ENSG00000179412.10_3	chr1	13182991	13183872	-	577	4	13	17	9	4	12	9	0	0	6	4	7	HNRNPCL4	ENSG00000179412.10_3	1	ENST00000323770.7_1	4	573	308	260	239	0	4
ENSG00000224199.1	chr1	13196270	13199067	+	1452	0	0	0	0	0	0	0	0	0	0	0	0	WI2-2994D6.1	ENSG00000224199.1	1	ENST00000457244.1	3	1449	1348	588	951	0	-1
ENSG00000229571.2	chr1	13216356	13219581	-	1476	0	0	0	0	0	0	0	0	0	0	0	0	PRAMEF26	ENSG00000229571.2	1	ENST00000423177.1	2	1474	1751	893	1751	334	2
ENSG00000204503.5	chr1	13328196	13331692	-	2104	0	0	0	0	0	0	0	0	0	0	0	0	PRAMEF3	ENSG00000204503.5	2	ENST00000353410.5,ENST00000376173.3	3,3	2101,2101	1395,1395	1210,1210	1008,1008	0,0	3,3
ENSG00000233394.1	chr1	13351482	13354323	+	1422	1	0	0	0	0	0	0	0	0	0	0	0	RP11-248D7.2	ENSG00000233394.1	1	ENST00000453094.1	3	1419	1422	575	1025	0	-1
ENSG00000204502.2	chr1	13359819	13369057	+	1855	0	0	0	0	0	0	0	0	0	0	0	0	PRAMEF5	ENSG00000204502.2	1	ENST00000376168.1	4	1851	7387	885	4973	1428	2
ENSG00000231219.1_3	chr1	13379149	13381237	-	1068	0	0	0	0	0	0	0	0	0	0	0	0	RP11-219C24.8	ENSG00000231219.1_3	1	ENST00000431596.1_1	2	1066	1022	572	1022	0	4
ENSG00000207511.1	chr1	13384735	13384841	-	107	0	0	0	1	0	0	0	0	0	0	0	0	RNU6-771P	ENSG00000207511.1	1	ENST00000384780.1	1	106	0	106	0	0	3
ENSG00000182330.6	chr1	13386646	13390765	-	1844	0	0	0	0	0	0	0	0	0	0	0	0	PRAMEF8	ENSG00000182330.6	1	ENST00000357367.2	4	1840	2279	897	981	0	4
ENSG00000237700.1	chr1	13411551	13414482	+	1425	0	0	0	0	0	0	0	0	0	0	0	0	RP11-219C24.6	ENSG00000237700.1	1	ENST00000437300.1	3	1422	1509	578	1112	0	-1
ENSG00000204501.2	chr1	13421176	13428191	+	1863	0	0	0	0	0	0	0	0	0	0	0	0	PRAMEF9	ENSG00000204501.2	1	ENST00000376152.1	4	1859	5156	893	2734	1434	2
ENSG00000228229.2	chr1	13429634	13430113	+	384	0	0	0	0	0	0	0	0	0	0	0	0	RP11-219C24.10	ENSG00000228229.2	1	ENST00000432559.2	2	382	97	259	97	0	-1
ENSG00000279169.2_3	chr1	13447556	13452656	-	2034	0	0	0	0	0	0	0	0	0	0	0	0	PRAMEF13	ENSG00000279169.2_3	2	ENST00000638454.1_2,ENST00000625019.2_3	6,8	1153,1366	624,3205	346,346	476,1718	0,0	8,10
ENSG00000274178.2_3	chr1	13448050	13450861	-	1417	0	0	0	0	0	0	0	0	0	0	0	0	CH17-409J4.2	ENSG00000274178.2_3	1	ENST00000610289.2_1	11	1406	1405	346	952	0	13
ENSG00000204491.2	chr1	13474689	13477522	-	1440	0	0	0	0	0	0	0	0	0	0	0	0	PRAMEF18	ENSG00000204491.2	1	ENST00000376126.2	3	1437	1396	578	1009	0	3
ENSG00000204488.3	chr1	13495254	13498260	+	1587	0	0	0	0	0	0	0	0	0	0	0	0	PRAMEF16	ENSG00000204488.3	1	ENST00000376121.3	3	1584	1422	690	1025	1422	1
ENSG00000204486.3	chr1	13516066	13526943	+	1597	0	0	0	0	0	0	0	0	0	0	0	0	PRAMEF21	ENSG00000204486.3	2	ENST00000332192.6,ENST00000327795.5	4,3	1593,1425	9284,3475	631,578	5809,1997	1425,1425	2,1
ENSG00000204485.2	chr1	13607431	13611550	-	1844	0	0	0	0	0	0	0	0	0	0	0	0	XX-FW84067D5.1	ENSG00000204485.2	2	ENST00000359310.2,ENST00000457228.1	4,3	1840,1444	2279,1298	897,583	981,915	0,0	6,5
ENSG00000224581.1	chr1	13632348	13635279	+	1425	0	0	0	0	0	0	0	0	0	0	0	0	XX-FW84067D5.2	ENSG00000224581.1	1	ENST00000447851.1	3	1422	1509	578	1112	0	-1
ENSG00000157358.7	chr1	13641973	13648988	+	1863	0	0	0	0	0	0	0	0	0	0	0	0	PRAMEF15	ENSG00000157358.7	1	ENST00000330087.5	4	1859	5156	893	2734	1434	2
ENSG00000204481.7_2	chr1	13668411	13673511	-	2301	0	0	0	0	0	0	0	0	0	0	0	0	PRAMEF14	ENSG00000204481.7_2	2	ENST00000602491.1_1,ENST00000334600.6_1	2,4	1330,1686	476,3082	1052,720	476,1718	0,0	4,4
ENSG00000204480.7_2	chr1	13695525	13698151	-	1233	0	0	0	0	0	0	0	0	0	0	0	0	PRAMEF19	ENSG00000204480.7_2	1	ENST00000376101.2_1	3	1230	1396	578	1009	0	3
ENSG00000204479.4_2	chr1	13716092	13719089	+	1578	0	0	0	0	0	0	0	0	0	0	0	0	PRAMEF17	ENSG00000204479.4_2	1	ENST00000376098.4_1	3	1575	1422	685	1025	1422	1
ENSG00000204478.9_2	chr1	13736907	13747803	+	1597	0	0	0	0	0	0	0	0	0	0	0	0	PRAMEF20	ENSG00000204478.9_2	2	ENST00000316412.9_1,ENST00000602960.1_1	4,3	1593,1499	9303,3496	631,631	5807,1997	1425,1425	2,1
ENSG00000162494.5_2	chr1	13801445	13840543	-	2209	0	0	0	0	0	0	0	0	0	0	0	0	LRRC38	ENSG00000162494.5_2	1	ENST00000376085.3_1	2	2207	36891	1122	36891	0	2
ENSG00000259961.1_4	chr1	13839715	13842765	+	477	0	0	0	0	0	0	0	0	0	0	0	0	RP4-597A16.2	ENSG00000259961.1_4	1	ENST00000563570.1_1	3	474	2576	253	1626	0	-1
ENSG00000215909.3_3	chr1	13881496	13882189	+	371	0	0	0	1	0	0	0	0	0	0	0	0	RP4-597A16.3	ENSG00000215909.3_3	1	ENST00000401091.2_1	2	369	324	288	324	0	-1
ENSG00000162493.16_4	chr1	13909960	13944452	+	3707	0	0	0	0	0	0	0	0	0	0	0	0	PDPN	ENSG00000162493.16_4	12	ENST00000294489.10_1,ENST00000617617.4_1,ENST00000376057.8_1,ENST00000621990.4_2,ENST00000506205.1_3,ENST00000510906.5_1,ENST00000509009.5_2,ENST00000376061.8_1,ENST00000513143.5_1,ENST00000487038.5_1,ENST00000475043.5_1,ENST00000488631.1_1	6,6,6,6,3,5,6,6,7,6,6,5	3098,2802,2795,2732,473,781,565,1362,1298,601,843,789	31394,31394,31400,31394,22916,29900,31306,31153,30996,29855,29932,29990	2052,2048,2052,2052,268,267,133,877,659,178,342,354	23073,23073,23073,23073,11727,23073,22985,22832,11486,21534,21605,21534	711,711,705,483,281,481,468,358,358,358,352,129	1,1,1,1,-1,1,1,2,3,2,2,2
ENSG00000222952.1	chr1	13949679	13949779	-	101	0	0	0	0	0	0	0	0	0	0	0	0	RNA5SP41	ENSG00000222952.1	1	ENST00000411020.1	1	100	0	100	0	0	3
ENSG00000266358.1	chr1	13950397	13950497	-	101	0	0	0	0	0	0	0	0	2	0	0	0	AL359771.1	ENSG00000266358.1	1	ENST00000577470.1	1	100	0	100	0	0	3
ENSG00000237445.2_4	chr1	13983806	13986405	-	379	0	0	0	0	0	0	0	0	0	0	0	0	CTA-520D8.2	ENSG00000237445.2_4	1	ENST00000441809.2_1	2	377	2222	333	2222	0	4
ENSG00000253085.1	chr1	14022565	14022694	-	130	0	0	0	0	0	0	0	0	0	0	0	0	SCARNA11	ENSG00000253085.1	1	ENST00000517276.1	1	129	0	129	0	0	3
ENSG00000116731.22_3	chr1	14026693	14151574	+	10923	545	604	557	299	572	408	591	4	11	667	788	808	PRDM2	ENSG00000116731.22_3	14	ENST00000484063.6_1,ENST00000376048.9_1,ENST00000311066.9_1,ENST00000235372.11_1,ENST00000491134.5_1,ENST00000502727.5_1,ENST00000502724.5_1,ENST00000413440.5_1,ENST00000343137.8_1,ENST00000491815.1_1,ENST00000503842.5_1,ENST00000407521.7_1,ENST00000505823.5_1,ENST00000487453.1_2	6,8,9,10,6,4,5,4,5,2,5,4,4,3	622,2680,7428,7947,1094,578,536,6171,5792,656,700,509,564,643	48643,122145,75776,112277,54955,33860,33805,32505,32450,23591,73364,28687,73419,6094	152,1906,4413,4413,552,190,155,4413,4413,593,340,214,260,488	15386,66940,23591,33596,19631,23591,19631,23591,19631,23591,43239,19552,43239,5230	0,674,5041,5149,133,0,0,4443,4443,0,186,0,186,0	2,2,2,2,-1,-1,-1,2,3,-1,3,3,2,2
ENSG00000189337.16_4	chr1	14219287	15444539	+	13841	674	660	849	594	501	399	437	0	33	250	282	248	KAZN	ENSG00000189337.16_4	9	ENST00000636564.1_1,ENST00000636203.1_2,ENST00000491547.1_1,ENST00000376030.6_2,ENST00000503743.5_1,ENST00000361144.9_1,ENST00000376028.8_1,ENST00000400798.6_1,ENST00000400797.3_1	3,17,7,15,9,8,5,8,8	1194,6857,5585,6015,1466,3830,795,3635,1287	410677,1218395,462271,513324,465614,140192,125550,134720,118591	964,3572,3450,3572,240,2522,244,2525,254	286679,418392,361461,361461,361461,73874,73874,73874,73874	315,2575,0,2313,1258,1240,0,977,977	1,1,-1,1,2,1,2,2,2
ENSG00000252151.1	chr1	14450728	14450830	-	103	0	0	0	0	0	1	0	0	0	0	0	0	RNU6-1265P	ENSG00000252151.1	1	ENST00000516342.1	1	102	0	102	0	0	3
ENSG00000231606.1_4	chr1	14548386	14549613	-	282	0	0	0	0	0	0	0	0	0	0	0	0	RP11-344F13.1	ENSG00000231606.1_4	1	ENST00000449215.1_1	2	280	947	216	947	0	4
ENSG00000234593.2_4	chr1	14675450	14718071	-	764	0	0	0	0	0	0	0	0	0	0	0	0	RP4-704D23.1	ENSG00000234593.2_4	1	ENST00000447908.2_1	4	760	41861	423	39662	0	6
ENSG00000235829.1_3	chr1	15018625	15019109	-	326	0	0	0	0	0	0	0	0	0	0	0	0	RP3-410I8.1	ENSG00000235829.1_3	1	ENST00000416175.1_1	2	324	160	278	160	0	4
ENSG00000175147.11_4	chr1	15438311	15478960	-	7100	137	130	130	102	22	24	60	0	3	56	67	51	TMEM51-AS1	ENSG00000175147.11_4	2	ENST00000310916.6_1,ENST00000404665.3_1	6,5	7094,2775	33555,33675	5992,1855	27918,27918	0,0	8,7
ENSG00000171729.13_2	chr1	15479028	15546976	+	2240	409	492	660	489	374	362	306	3	11	519	789	728	TMEM51	ENSG00000171729.13_2	6	ENST00000428417.5_1,ENST00000376014.7_1,ENST00000451326.6_1,ENST00000400796.7_1,ENST00000434578.6_2,ENST00000376008.2_1	3,4,3,3,4,4	1939,1839,763,1839,1857,1927	66006,65934,66006,64836,64768,64764	1151,1013,536,1082,1063,1154	62111,57706,62111,60941,56536,56536	760,760,0,760,406,760	2,3,2,2,3,3
ENSG00000204464.7_2	chr1	15490840	15497813	-	559	0	0	0	0	0	0	0	0	0	0	0	0	C1orf195	ENSG00000204464.7_2	2	ENST00000424792.5_1,ENST00000625027.2_1	2,2	253,439	6720,2404	136,303	6720,2404	0,0	4,4
ENSG00000215720.4_4	chr1	15518324	15519341	-	710	1	0	0	0	0	0	0	0	0	1	0	0	RP1-21O18.3	ENSG00000215720.4_4	1	ENST00000400795.3_1	2	708	309	613	309	0	4
ENSG00000278480.1_4	chr1	15552869	15554045	+	966	3	5	0	0	1	0	1	0	0	1	1	1	RP5-903E17.2	ENSG00000278480.1_4	1	ENST00000612442.1_1	2	964	212	870	212	0	-1
ENSG00000142621.19_3	chr1	15573768	15726779	+	12805	0	1	1	2	3	3	2	0	1	4	2	5	FHAD1	ENSG00000142621.19_3	22	ENST00000358897.8_1,ENST00000433640.6_1,ENST00000375998.8_1,ENST00000462113.1_1,ENST00000375996.6_1,ENST00000375997.8_1,ENST00000524761.5_1,ENST00000375995.3_2,ENST00000483694.1_1,ENST00000459961.1_1,ENST00000472131.5_1,ENST00000471347.5_1,ENST00000444385.5_2,ENST00000529606.5_2,ENST00000314668.13_2,ENST00000532408.1_1,ENST00000483120.1_1,ENST00000481324.5_1,ENST00000477846.5_1,ENST00000495195.5_…	31,4,30,2,9,8,4,6,4,2,3,24,16,16,14,4,4,14,9,4,4,3	5059,566,4325,354,1559,1451,374,779,560,4404,865,3234,3465,2418,2643,571,1377,2324,1264,689,364,454	145795,48916,141419,2242,22739,22846,22286,23039,2574,1135,2052,67162,39332,50225,50052,14592,5149,33106,23319,15560,13788,8682	829,267,267,242,713,713,152,252,192,2673,388,246,1402,444,829,173,576,830,329,232,232,186	20446,37522,20446,2242,6524,9131,10592,13872,1255,1135,1135,9940,7354,9017,15104,7271,2195,6034,5858,14017,7349,6034	4209,0,4209,0,0,943,0,750,0,0,0,0,2065,2090,1930,0,0,1399,0,0,0,0	2,-1,1,-1,-1,1,1,1,-1,-1,-1,-1,-1,-1,-1,-1,-1,-1,-1,-1,-1,-1
ENSG00000233485.1_5	chr1	15653176	15670372	-	3105	0	0	0	0	0	0	0	0	0	0	0	0	RP3-467K16.2	ENSG00000233485.1_5	1	ENST00000428747.1_1	2	3103	14093	3003	14093	0	4
ENSG00000236045.1_5	chr1	15660662	15661960	-	727	0	0	0	0	0	0	0	0	0	0	0	0	RP3-467K16.7	ENSG00000236045.1_5	1	ENST00000439788.1_1	2	725	573	533	573	0	4
ENSG00000228140.1_4	chr1	15729475	15735929	-	5178	0	0	0	1	2	0	0	0	0	1	2	0	RP3-467K16.4	ENSG00000228140.1_4	1	ENST00000427824.1_1	3	5175	1279	4928	1163	0	5
ENSG00000142634.12_2	chr1	15736391	15756839	+	2531	279	324	353	321	284	290	395	0	20	266	316	347	EFHD2	ENSG00000142634.12_2	2	ENST00000375980.8_1,ENST00000445566.1_1	4,5	2415,894	18033,17922	1750,488	15592,15592	719,533	1,-1
ENSG00000162438.11_2	chr1	15764935	15775737	+	3486	0	0	1	0	0	0	0	0	0	0	1	0	CTRC	ENSG00000162438.11_2	4	ENST00000375949.4_1,ENST00000375943.6_1,ENST00000476813.5_1,ENST00000483406.1_1	8,5,3,6	890,3142,297,630	7324,7657,4789,5673	152,2667,125,152	1857,3943,3943,2042	799,207,0,0	1,1,-1,-1
ENSG00000142615.7_3	chr1	15783223	15798586	+	1519	0	0	0	0	0	0	0	0	0	0	0	0	CELA2A	ENSG00000142615.7_3	3	ENST00000459653.1_1,ENST00000359621.4_1,ENST00000497590.1_1	4,8,2	528,911,583	5755,14451,293	278,152,537	4387,4452,293	0,802,0	-1,1,-1
ENSG00000215704.9_3	chr1	15792404	15817895	+	1457	0	0	0	0	0	0	0	0	0	0	0	0	CELA2B	ENSG00000215704.9_3	4	ENST00000494280.1_1,ENST00000375910.7_1,ENST00000422901.1_3,ENST00000488764.1_1	6,8,4,3	804,915,373,437	16655,14384,5519,5097	235,152,104,185	8919,4553,4553,3858	0,802,0,0	-1,1,-1,-1
ENSG00000132906.17_3	chr1	15817327	15853029	-	5269	277	328	303	277	226	191	238	1	59	277	385	416	CASP9	ENSG00000132906.17_3	11	ENST00000546424.5_1,ENST00000333868.9_1,ENST00000348549.9_1,ENST00000400777.7_1,ENST00000424908.5_1,ENST00000375890.8_1,ENST00000474305.2_1,ENST00000447522.5_2,ENST00000440484.1_2,ENST00000546969.1_1,ENST00000469637.1_1	8,9,5,9,5,9,9,7,5,3,3	4455,2010,1616,1869,735,1342,1102,947,776,566,722	29158,30015,30461,29957,13519,30529,30155,28669,18816,15877,7676	3169,765,765,669,237,285,179,285,285,285,343	10203,10203,22658,10203,10610,10203,10343,10203,10203,10203,6190	0,0,0,1418,147,0,0,0,0,0,0	8,9,5,4,5,9,3,9,7,5,5
ENSG00000116138.12_2	chr1	15853308	15918874	+	8563	1517	1457	1624	1367	1927	1673	1277	6	67	1942	1890	1863	DNAJC16	ENSG00000116138.12_2	10	ENST00000375838.5_1,ENST00000616884.4_1,ENST00000375847.7_1,ENST00000475133.5_1,ENST00000375849.5_1,ENST00000483270.1_1,ENST00000472665.1_1,ENST00000479655.1_1,ENST00000490811.1_1,ENST00000495523.1_1	13,14,15,15,15,14,5,2,2,2	2344,5868,6054,6284,3431,2833,440,508,506,704	37438,39050,38866,38636,45848,29938,2615,83,509,1418	513,3953,3955,3955,1332,457,217,327,283,628	11098,11098,11098,11098,11098,16787,1560,83,509,1418	1776,1404,2335,1776,1954,0,289,0,0,0	2,6,2,2,2,-1,-1,-1,-1,-1
ENSG00000251866.1	chr1	15868660	15868799	+	140	5	6	6	5	2	3	2	0	0	9	3	5	SCARNA21	ENSG00000251866.1	1	ENST00000516057.1	1	139	0	139	0	0	-1
ENSG00000272510.1_4	chr1	15892106	15892451	-	346	13	15	32	21	19	9	34	0	0	8	33	32	RP4-680D5.8	ENSG00000272510.1_4	1	ENST00000606186.1_1	1	345	0	345	0	0	3
ENSG00000116771.5_2	chr1	15898848	15911605	-	2500	3870	4689	6441	5984	4611	4774	6603	9	3764	3506	5683	5641	AGMAT	ENSG00000116771.5_2	1	ENST00000375826.3_1	7	2493	10264	1371	3051	0	7
ENSG00000237301.1_4	chr1	15912631	15930121	-	2845	7	3	0	1	1	4	1	0	1	9	11	6	RP4-680D5.2	ENSG00000237301.1_4	1	ENST00000428945.1_1	2	2843	14647	2306	14647	0	4
ENSG00000235084.3_3	chr1	15931092	15931538	+	447	15	9	11	9	5	6	8	0	1	7	11	10	RP4-680D5.3	ENSG00000235084.3_3	1	ENST00000454346.1_1	1	446	0	446	0	0	-1
ENSG00000252417.1	chr1	15934573	15934640	-	68	0	0	0	0	0	0	0	0	0	0	0	0	RNU7-179P	ENSG00000252417.1	1	ENST00000516608.1	1	67	0	67	0	0	3
ENSG00000236500.1_3	chr1	15941138	15941362	-	225	0	0	0	0	0	0	0	0	0	0	0	0	RP4-680D5.4	ENSG00000236500.1_3	1	ENST00000422383.1_1	1	224	0	224	0	0	3
ENSG00000197312.11_3	chr1	15943995	15995539	+	12136	3255	3683	5134	3582	3954	3373	4686	9	301	3408	3462	3127	DDI2	ENSG00000197312.11_3	6	ENST00000480945.5_1,ENST00000486680.1_1,ENST00000546927.1_1,ENST00000320153.10_1,ENST00000483899.1_1,ENST00000548451.1_1	10,4,2,8,4,2	10615,1497,590,2068,493,623	40929,15266,8861,28587,18905,4526	9207,867,397,1220,136,564	8861,8861,8861,9643,9957,4526	1191,0,0,297,307,0	1,-1,-1,-1,-1,-1
ENSG00000215695.1_3	chr1	15986364	15988217	+	1854	978	1143	1511	1133	1195	962	1339	1	7	1078	1107	1061	RSC1A1	ENSG00000215695.1_3	1	ENST00000345034.1_1	1	1853	0	1853	0	1853	1
ENSG00000271742.1_4	chr1	16009368	16009623	-	256	0	0	0	0	0	0	0	0	0	0	0	1	RP4-680D5.9	ENSG00000271742.1_4	1	ENST00000606262.1_1	1	255	0	255	0	0	3
ENSG00000116786.12_4	chr1	16010827	16061264	+	4122	989	996	1068	835	954	919	879	2	19	1223	1256	1229	PLEKHM2	ENSG00000116786.12_4	5	ENST00000375799.7_1,ENST00000375793.2_1,ENST00000462455.1_1,ENST00000642363.1_1,ENST00000477849.1_1	20,19,5,21,7	4102,3985,504,3754,1050	46335,46394,34824,46459,3220	972,972,135,972,318	31619,31619,31619,31619,1069	3040,2981,0,2916,0	1,1,-1,1,-1
ENSG00000264048.1	chr1	16010967	16011053	+	87	6	8	12	5	8	6	3	0	1	7	10	8	AL121992.1	ENSG00000264048.1	1	ENST00000584345.1	1	86	0	86	0	0	-1
ENSG00000237938.5_4	chr1	16046807	16063391	-	1533	1	0	0	0	0	0	0	0	0	1	0	0	RP11-288I21.1	ENSG00000237938.5_4	3	ENST00000623689.3_2,ENST00000615472.1_2,ENST00000453804.1_1	4,4,4	680,751,641	11460,10964,13536	283,279,348	9034,6515,9100	0,0,0	6,6,6
ENSG00000162461.7_2	chr1	16062900	16067891	+	3195	6	5	2	1	4	1	8	0	1	8	4	2	SLC25A34	ENSG00000162461.7_2	3	ENST00000294454.5_1,ENST00000489568.1_1,ENST00000465495.1_1	5,4,2	2981,608,400	2010,944,127	2172,211,338	1066,496,127	910,0,0	1,-1,-1
ENSG00000224459.1_4	chr1	16066546	16076391	-	639	2	3	1	0	2	0	1	0	0	1	2	2	RP11-169K16.4	ENSG00000224459.1_4	1	ENST00000418525.1_1	2	637	9208	466	9208	0	4
ENSG00000162460.6_2	chr1	16068917	16074477	+	1520	21	9	13	10	20	7	39	0	3	70	53	38	TMEM82	ENSG00000162460.6_2	2	ENST00000375782.1_1,ENST00000465575.1_1	6,3	1514,694	4046,1339	436,420	2287,966	1026,0	1,-1
ENSG00000162458.12_4	chr1	16083102	16113089	+	4716	697	666	440	330	671	628	519	2	477	1465	1417	1490	FBLIM1	ENSG00000162458.12_4	15	ENST00000496928.6_1,ENST00000508310.5_1,ENST00000510393.5_1,ENST00000430076.5_1,ENST00000375771.5_3,ENST00000510929.5_1,ENST00000502638.5_1,ENST00000375766.7_3,ENST00000483633.6_1,ENST00000502739.5_1,ENST00000431771.6_1,ENST00000441801.6_1,ENST00000332305.5_3,ENST00000514156.1_1,ENST00000509138.1_1	4,4,4,4,10,4,4,9,4,5,4,6,5,3,2	607,607,572,503,3488,507,578,3686,567,557,573,1537,1525,317,504	7859,7862,8004,7888,26447,6574,6551,24489,8208,15281,8067,9206,18851,7353,7261	192,189,253,189,2046,192,189,2046,269,269,269,624,781,137,290	6138,6141,6141,6167,7261,6164,6141,7261,5648,5648,5645,4040,7261,7261,7261	0,0,0,0,1115,0,0,1115,0,0,0,1120,826,0,0	4,4,4,4,4,4,4,3,3,3,3,2,1,-1,-1
ENSG00000224321.1_3	chr1	16119291	16119780	+	490	1	1	1	2	1	3	6	0	0	1	2	3	RP11-169K16.6	ENSG00000224321.1_3	1	ENST00000431782.1_1	1	489	0	489	0	0	-1
ENSG00000233954.6_2	chr1	16133664	16135843	-	2180	135	202	236	193	149	180	147	0	6	112	174	160	UQCRHL	ENSG00000233954.6_2	1	ENST00000483273.2_1	1	2179	0	2179	0	-271	1
ENSG00000178715.8_4	chr1	16154727	16155164	+	438	4	9	6	0	3	0	2	0	0	2	4	7	RP11-169K16.8	ENSG00000178715.8_4	1	ENST00000321418.6_1	1	437	0	437	0	0	-1
ENSG00000179743.4_4	chr1	16160969	16174642	-	2473	85	112	94	61	51	36	78	0	7	64	81	83	RP11-169K16.9	ENSG00000179743.4_4	1	ENST00000317122.2_1	2	2471	11202	2432	11202	0	4
ENSG00000065526.10_2	chr1	16174359	16266955	+	13294	2438	2160	2602	1503	2089	1622	2795	9	45	5028	3159	3131	SPEN	ENSG00000065526.10_2	5	ENST00000375759.7_1,ENST00000471538.1_1,ENST00000438066.1_1,ENST00000442985.1_1,ENST00000487496.1_1	15,2,4,7,2	12217,1402,1729,884,541	80379,1807,36070,43446,420	8175,893,893,200,293	32643,1807,32643,32646,420	10980,0,0,0,0	1,-1,1,-1,-1
ENSG00000238818.1	chr1	16237392	16237492	+	101	4	3	5	1	3	1	2	0	0	4	3	1	snoU13	ENSG00000238818.1	1	ENST00000459258.1	1	100	0	100	0	0	-1
ENSG00000270620.1_4	chr1	16244193	16244403	-	211	0	0	0	0	0	0	1	0	0	0	0	0	RP1-134O19.3	ENSG00000270620.1_4	1	ENST00000604816.1_1	1	210	0	210	0	0	3
ENSG00000116809.11_2	chr1	16268364	16302627	-	4240	406	507	501	440	399	385	416	2	13	407	529	559	ZBTB17	ENSG00000116809.11_2	16	ENST00000462525.1_1,ENST00000440560.5_1,ENST00000375743.8_1,ENST00000537142.5_1,ENST00000375733.6_1,ENST00000444358.1_1,ENST00000488008.1_1,ENST00000471805.5_1,ENST00000472658.1_1,ENST00000474511.1_1,ENST00000487785.1_1,ENST00000492834.1_1,ENST00000490899.1_1,ENST00000464719.1_1,ENST00000479282.5_1,ENST00000494020.1_1	2,4,16,15,16,6,2,4,2,3,2,4,4,4,5,4	774,727,2729,2496,2754,716,465,540,589,791,399,959,671,481,1049,818	79,493,31528,31712,31507,1305,163,578,80,173,405,708,1446,1090,29209,6222	391,383,383,381,381,209,320,279,327,585,296,369,214,140,448,361	79,326,24542,25916,24542,585,163,405,80,93,405,513,619,641,24542,4413	0,102,0,0,0,0,0,0,0,0,0,0,0,0,0,0	4,4,16,15,16,8,4,6,4,5,4,6,6,6,7,6
ENSG00000234607.2_4	chr1	16296127	16296689	+	563	0	0	0	0	0	0	0	0	0	1	0	0	RP11-5P18.1	ENSG00000234607.2_4	1	ENST00000416882.2_1	1	562	0	562	0	0	-1
ENSG00000231353.1_4	chr1	16314677	16314936	+	260	0	0	0	0	0	0	0	0	0	0	0	0	RP11-5P18.3	ENSG00000231353.1_4	1	ENST00000424379.1_1	1	259	0	259	0	0	-1
ENSG00000275503.1_4	chr1	16315635	16315870	-	236	0	0	0	0	0	0	0	0	0	0	0	0	RP11-5P18.11	ENSG00000275503.1_4	1	ENST00000613591.1_1	1	235	0	235	0	0	3
ENSG00000224966.4_3	chr1	16316366	16321246	+	962	0	0	0	0	0	0	0	0	0	0	0	0	RP11-5P18.2	ENSG00000224966.4_3	1	ENST00000505954.1_1	8	954	3926	180	986	0	-1
ENSG00000183888.4_2	chr1	16330731	16335302	+	3039	281	329	390	326	283	257	150	2	25	312	446	422	C1orf64	ENSG00000183888.4_2	1	ENST00000329454.2_1	2	3037	1534	2888	1534	508	1
ENSG00000233078.1_4	chr1	16332655	16333166	-	466	0	0	0	0	0	0	0	0	0	0	0	0	RP11-5P18.5	ENSG00000233078.1_4	1	ENST00000437156.1_1	2	464	47	278	47	0	4
ENSG00000173641.17_5	chr1	16340523	16346089	-	3910	1	2	0	1	0	1	0	0	0	0	0	0	HSPB7	ENSG00000173641.17_5	7	ENST00000411503.5_4,ENST00000442459.2_1,ENST00000311890.13_2,ENST00000375718.4_1,ENST00000463576.5_1,ENST00000487046.1_2,ENST00000406363.2_2	3,2,3,4,3,3,3	2125,2700,2889,2411,578,841,645	1888,1315,1873,3155,1873,1858,1861	1731,1731,1731,1731,385,385,260	1330,1315,1315,1315,1330,1315,1315	0,0,0,0,208,0,0	3,4,3,4,3,3,3
ENSG00000186510.11_2	chr1	16345370	16360545	+	3476	2	1	3	0	0	2	0	0	0	0	2	0	CLCNKA	ENSG00000186510.11_2	7	ENST00000464764.5_1,ENST00000477360.2_1,ENST00000375692.5_1,ENST00000495784.1_1,ENST00000439316.6_1,ENST00000331433.4_1,ENST00000491433.1_1	24,3,21,6,19,20,8	3036,397,2560,721,1978,2455,816	12139,310,9619,3962,9671,9543,2420	439,216,439,150,213,439,173	1217,203,1217,1217,2180,1217,642	0,0,2042,0,1917,2045,0	-1,-1,3,-1,2,2,-1
ENSG00000232456.1_4	chr1	16361673	16366524	-	704	0	0	0	0	0	0	0	0	0	0	0	0	RP11-5P18.10	ENSG00000232456.1_4	1	ENST00000447882.1_1	5	699	4152	280	2810	0	7
ENSG00000184908.17_2	chr1	16370231	16383803	+	2939	0	1	0	0	0	0	0	0	3	0	0	0	CLCNKB	ENSG00000184908.17_2	4	ENST00000619181.4_1,ENST00000375679.8_1,ENST00000375667.7_1,ENST00000431772.1_1	14,20,13,5	1530,2547,2116,459	12019,10984,6403,4526	213,439,456,133	3497,1663,1663,1663	1379,2045,1541,436	2,2,1,-1
ENSG00000185519.8_2	chr1	16384264	16400127	-	1701	1	0	0	0	0	0	0	0	1	0	0	1	FAM131C	ENSG00000185519.8_2	2	ENST00000375662.4_1,ENST00000494078.1_1	7,6	1688,1069	14169,14284	948,438	9785,10887	0,0	7,8
ENSG00000142627.12_2	chr1	16450832	16482582	-	4159	5389	4827	2943	2148	3614	2957	1090	18	99	5525	4423	4695	EPHA2	ENSG00000142627.12_2	4	ENST00000358432.7_1,ENST00000462805.1_1,ENST00000480202.1_1,ENST00000461614.1_1	17,2,6,2	3947,436,789,873	27803,113,11101,6801	983,355,332,669	9948,113,7993,6801	0,0,0,0	17,4,8,4
ENSG00000227959.1_4	chr1	16481706	16483824	+	904	10	10	6	10	22	10	5	0	0	20	17	12	RP11-276H7.2	ENSG00000227959.1_4	1	ENST00000424774.1_1	2	902	1216	544	1216	0	-1
ENSG00000224621.1_4	chr1	16485761	16488378	+	544	16	10	5	2	16	10	3	0	0	18	13	16	RP11-276H7.3	ENSG00000224621.1_4	1	ENST00000426353.1_1	2	542	2075	382	2075	0	-1
ENSG00000234166.1_4	chr1	16524349	16524852	+	439	0	0	0	0	0	0	0	0	0	0	0	0	RP4-733M16.2	ENSG00000234166.1_4	1	ENST00000457809.1_1	2	437	66	362	66	0	-1
ENSG00000142632.16_3	chr1	16524349	16539104	-	3745	60	68	58	78	40	24	49	0	3	59	69	83	ARHGEF19	ENSG00000142632.16_3	6	ENST00000478117.5_1,ENST00000270747.7_1,ENST00000449495.1_1,ENST00000478210.1_1,ENST00000471928.1_1,ENST00000441785.1_2	11,16,6,5,3,2	2024,3013,915,680,650,580	7133,11492,817,946,705,97	890,640,363,346,456,346	2528,3419,264,506,608,97	0,0,0,0,0,80	13,16,8,7,5,2
ENSG00000237276.8_3	chr1	16542404	16554522	-	1990	3	5	3	2	3	2	1	0	0	2	4	2	ANO7P1	ENSG00000237276.8_3	3	ENST00000442385.5_1,ENST00000475369.1_1,ENST00000602586.1_1	3,2,17	325,353,1703	926,518,9855	152,201,302	518,518,4068	0,0,0	5,4,19
ENSG00000204377.3	chr1	16555368	16556038	-	252	8	4	7	4	4	11	6	0	3	1	4	6	C1orf134	ENSG00000204377.3	1	ENST00000375605.2	2	250	420	190	420	0	2
ENSG00000132881.11_2	chr1	16558195	16563657	-	1545	20	24	24	23	36	34	30	0	1	9	16	18	RSG1	ENSG00000132881.11_2	2	ENST00000375599.7_1,ENST00000434014.1_1	5,4	1540,332	3922,4046	597,152	2867,2867	0,0	5,6
ENSG00000233929.1_3	chr1	16567708	16567893	-	186	2	1	0	0	2	1	1	0	0	3	0	0	MTL1	ENSG00000233929.1_3	1	ENST00000421314.1_1	1	185	0	185	0	0	3
ENSG00000037637.10_3	chr1	16573334	16678949	-	8984	793	750	975	797	763	769	848	3	53	849	872	922	FBXO42	ENSG00000037637.10_3	4	ENST00000375592.7_1,ENST00000456164.5_2,ENST00000444116.1_2,ENST00000478089.1_1	10,3,4,3	6192,1150,941,2917	99423,1195,1570,20136	4946,703,703,2603	38024,692,692,10886	0,0,0,0	10,5,6,5
ENSG00000055070.16_2	chr1	16679070	16724640	+	4747	2101	2550	2429	1544	1810	1234	2254	11	10	1468	2366	2553	SZRD1	ENSG00000055070.16_2	10	ENST00000475078.1_1,ENST00000401088.8_1,ENST00000471507.5_1,ENST00000401089.3_1,ENST00000486763.5_1,ENST00000476423.5_1,ENST00000475554.5_1,ENST00000472351.5_1,ENST00000492354.1_1,ENST00000472461.1_1	3,4,4,3,5,4,5,5,3,4	487,3632,888,3444,544,563,578,786,3398,839	40293,27427,27430,27476,27360,25579,27351,27357,27479,26723	237,3104,368,3107,251,292,254,352,3104,304	39805,24067,24067,25920,19747,20194,23242,19747,25923,23360	0,455,452,399,0,253,0,0,396,0	-1,1,1,1,-1,1,-1,-1,1,-1
ENSG00000226457.1_4	chr1	16695645	16696025	-	381	0	1	1	0	0	0	0	0	0	0	2	2	RP11-430L17.1	ENSG00000226457.1_4	1	ENST00000445689.1_1	1	380	0	380	0	0	3
ENSG00000187144.11_2	chr1	16713612	16763919	-	4506	21	14	31	24	12	12	34	0	32	58	69	74	SPATA21	ENSG00000187144.11_2	6	ENST00000491418.5_1,ENST00000466212.5_1,ENST00000335496.5_1,ENST00000540400.1_1,ENST00000375577.5_1,ENST00000612240.1_1	5,17,13,11,5,4	656,3602,2002,1762,1131,599	16201,38110,36779,36761,11381,5675	184,631,442,442,306,207	12043,10996,11466,14609,5706,3228	180,0,0,0,0,0	5,19,13,11,5,4
ENSG00000157191.19_2	chr1	16767167	16786573	+	5559	1098	1455	1371	1320	1373	1331	1328	4	23	838	1336	1309	NECAP2	ENSG00000157191.19_2	12	ENST00000337132.9_1,ENST00000504551.6_1,ENST00000457722.6_1,ENST00000486390.1_1,ENST00000443980.6_1,ENST00000504858.5_1,ENST00000508680.5_1,ENST00000492095.5_1,ENST00000459640.5_1,ENST00000496239.5_1,ENST00000513161.1_1,ENST00000509727.1_1	8,6,8,2,7,6,5,9,9,7,6,2	2062,762,927,570,1922,721,465,1778,972,4612,707,548	17344,17525,17422,313,17419,10557,7143,17556,17228,14707,17529,2949	1236,177,231,453,1235,177,111,803,177,2922,177,372	4138,7017,4138,313,6827,4138,4138,4138,4138,4138,5361,2949	784,603,706,0,815,302,0,784,579,0,188,0	1,1,1,-1,1,1,-1,1,1,-1,-1,-1
ENSG00000226029.1_3	chr1	16787443	16794976	+	3245	39	45	39	28	32	20	33	0	34	50	29	36	RP4-798A10.2	ENSG00000226029.1_3	1	ENST00000457898.1_1	2	3243	4290	2339	4290	0	-1
ENSG00000080947.14_2	chr1	16793931	16825752	-	6813	185	136	222	153	164	172	249	0	44	233	202	217	CROCCP3	ENSG00000080947.14_2	6	ENST00000263511.8_1,ENST00000591348.5_1,ENST00000420820.6_1,ENST00000591316.1_1,ENST00000590118.5_1,ENST00000589964.1_1	15,12,14,2,4,3	5353,1683,1933,1561,570,252	19912,20477,13458,4850,8053,8359	2691,237,235,1507,306,137	5698,6818,4850,4850,7887,8277	0,0,0,0,0,0	17,14,16,4,6,5
ENSG00000206652.1	chr1	16840617	16840780	-	164	45	69	55	52	45	30	18	0	4	342	400	443	RNU1-1	ENSG00000206652.1	1	ENST00000383925.1	1	163	0	163	0	0	3
ENSG00000261135.1_4	chr1	16841140	16842249	+	1110	18	29	12	10	7	14	8	0	0	7	8	9	RP4-798A10.7	ENSG00000261135.1_4	1	ENST00000562878.1_1	1	1109	0	1109	0	0	-1
ENSG00000224174.2_4	chr1	16847189	16848291	+	327	0	0	0	0	0	0	0	0	0	0	0	0	RP4-798A10.4	ENSG00000224174.2_4	1	ENST00000452795.2_1	2	325	777	232	777	0	-1
ENSG00000233421.4_3	chr1	16860381	16862667	-	2068	48	70	54	48	49	46	44	0	1	23	49	72	RP5-875O13.1	ENSG00000233421.4_3	2	ENST00000415386.2_1,ENST00000614408.1_1	2,2	1546,826	217,4	1223,434	217,4	0,0	4,4
ENSG00000268674.1	chr1	16865561	16866070	+	510	0	0	0	0	0	0	0	0	0	0	0	0	AL355149.2	ENSG00000268674.1	1	ENST00000601199.1	1	509	0	509	0	509	1
ENSG00000225710.1_4	chr1	16875146	16879026	-	882	0	0	0	0	0	0	0	0	0	1	0	2	RP5-875O13.6	ENSG00000225710.1_4	1	ENST00000438396.1_1	3	879	3001	528	1815	0	5
ENSG00000266584.1	chr1	16875409	16875482	+	74	0	0	0	0	0	0	0	0	0	0	0	1	AL355149.1	ENSG00000266584.1	1	ENST00000577341.1	1	73	0	73	0	0	-1
ENSG00000219481.10_3	chr1	16888814	16940057	-	12212	3127	3133	3102	2408	3270	3028	3147	7	69	4708	3290	3310	NBPF1	ENSG00000219481.10_3	7	ENST00000430580.6_2,ENST00000432949.5_2,ENST00000392963.5_1,ENST00000420513.1_1,ENST00000599069.5_1,ENST00000599908.1_1,ENST00000449853.2_1	29,29,19,4,3,1,3	5903,4147,2653,484,2749,3446,2752	45265,45322,37428,14604,11224,0,5376	1867,271,214,191,2254,3446,2285	13499,13499,11928,13495,6665,0,4559	0,0,0,0,0,0,0	29,31,5,6,5,3,5
ENSG00000271732.1_4	chr1	16943886	16944224	+	339	3	5	1	1	1	1	0	0	1	1	0	2	RP5-1182A14.5	ENSG00000271732.1_4	1	ENST00000607700.1_1	1	338	0	338	0	0	-1
ENSG00000215908.10_3	chr1	16944748	16983727	-	5606	1958	1448	2277	1622	1601	1727	2061	1	1286	1630	1861	1813	CROCCP2	ENSG00000215908.10_3	7	ENST00000639481.1_1,ENST00000640476.1_1,ENST00000639594.1_1,ENST00000639456.1_1,ENST00000412962.4_3,ENST00000635081.1_1,ENST00000362058.2_2	4,6,7,13,18,10,6	1292,1744,2168,2562,2755,1894,2023	6841,8652,10685,23851,35508,17403,12990	850,847,847,830,251,630,1439	5751,5737,5530,7599,23158,9682,9682	0,0,0,0,0,0,0	6,8,9,15,20,12,8
ENSG00000283773.1_3	chr1	16969262	16969604	-	166	197	171	198	161	144	155	191	0	35	177	183	191	RP5-1182A14.8	ENSG00000283773.1_3	1	ENST00000639399.1_1	2	164	178	83	178	0	4
ENSG00000186301.8_2	chr1	16972117	16976784	+	2291	3414	2927	3369	2454	2156	2169	3699	9	23	2041	2148	2117	MST1P2	ENSG00000186301.8_2	1	ENST00000457982.3_1	18	2273	2394	232	691	0	-1
ENSG00000282143.1_4	chr1	16983374	16994019	+	817	0	0	1	0	0	0	0	0	0	1	0	0	RP1-163M9.8	ENSG00000282143.1_4	1	ENST00000633763.1_1	3	814	9831	583	8417	0	-1
ENSG00000207513.1	chr1	16993280	16993443	-	164	2	1	0	1	1	1	1	0	0	2	4	8	RNU1-3	ENSG00000207513.1	1	ENST00000384782.1	1	163	0	163	0	0	3
ENSG00000237847.2	chr1	16999498	17000007	+	510	0	0	0	0	0	0	0	0	0	0	0	0	AL137798.1	ENSG00000237847.2	1	ENST00000434336.2	1	509	0	509	0	509	1
ENSG00000280114.1_1	chr1	17007592	17015244	-	1351	29	23	21	15	16	16	44	0	1	34	24	27	RP5-875O13.7	ENSG00000280114.1_1	1	ENST00000624828.1_1	5	1346	6306	532	4395	0	7
ENSG00000264742.1	chr1	17007750	17007823	+	74	0	0	0	0	0	0	0	0	0	0	0	0	AL021920.1	ENSG00000264742.1	1	ENST00000584111.1	1	73	0	73	0	0	-1
ENSG00000236698.1_3	chr1	17012116	17012550	-	435	15	18	31	25	16	15	24	0	1	15	17	16	EIF1AP1	ENSG00000236698.1_3	1	ENST00000419267.1_1	1	434	0	434	0	0	3
ENSG00000268869.5_2	chr1	17013834	17046652	-	3178	28	33	25	22	19	20	55	0	4	45	34	35	ESPNP	ENSG00000268869.5_2	3	ENST00000414828.1_1,ENST00000270691.8_1,ENST00000492551.2_1	3,11,3	568,2004,1168	4402,26935,2527	204,271,803	3591,11886,2362	0,0,0	5,13,5
ENSG00000279151.1_4	chr1	17028041	17032089	+	406	13	4	4	8	1	1	23	0	2	3	3	6	RP1-163M9.7	ENSG00000279151.1_4	1	ENST00000624517.1_1	3	403	3645	149	2385	0	-1
ENSG00000268991.1	chr1	17060447	17060956	-	510	0	0	0	0	0	0	0	0	0	0	0	0	AL021920.2	ENSG00000268991.1	1	ENST00000600179.1	1	509	0	509	0	-505	1
ENSG00000282740.1_4	chr1	17066433	17077084	-	819	0	1	2	0	0	0	0	0	0	0	0	0	RP5-1182A14.7	ENSG00000282740.1_4	1	ENST00000633433.1_1	3	816	9835	585	8421	0	5
ENSG00000058453.16_3	chr1	17066768	17299474	+	8871	109	106	114	101	93	92	119	0	36	125	136	126	CROCC	ENSG00000058453.16_3	13	ENST00000466256.6_1,ENST00000375541.9_1,ENST00000445545.6_1,ENST00000467938.5_1,ENST00000492631.5_1,ENST00000467715.2_1,ENST00000494191.6_1,ENST00000486318.1_1,ENST00000498688.5_1,ENST00000477773.1_1,ENST00000497654.2_1,ENST00000465021.5_1,ENST00000465291.1_1	9,37,24,17,10,4,6,5,4,3,3,5,3	1859,6619,3907,2498,1363,610,1990,719,579,645,505,775,680	199302,44410,34416,29097,14907,2692,13458,7111,5769,2302,1119,3939,502	662,619,320,236,233,233,1055,230,193,385,324,215,331	189889,5367,5807,7048,6244,1172,6311,4922,4154,2027,742,1835,319	0,6017,0,0,0,0,0,0,0,0,0,0,0	-1,1,-1,-1,-1,-1,-1,-1,-1,-1,-1,-1,-1
ENSG00000227684.2_3	chr1	17066775	17077463	+	762	1	2	1	0	1	3	4	0	0	2	4	2	RP1-163M9.5	ENSG00000227684.2_3	2	ENST00000633627.1_1,ENST00000457096.1_1	2,4	571,494	10117,237	454,188	10117,93	0,0	-1,-1
ENSG00000207389.1	chr1	17067011	17067174	+	164	0	6	5	2	1	2	0	0	1	20	28	18	RNU1-4	ENSG00000207389.1	1	ENST00000384659.1	1	163	0	163	0	0	-1
ENSG00000186715.10_2	chr1	17081405	17096732	-	5180	454	412	506	431	322	341	650	2	14	302	361	307	MST1L	ENSG00000186715.10_2	5	ENST00000455405.6_1,ENST00000624762.3_1,ENST00000442552.7_1,ENST00000544155.1_1,ENST00000545160.1_1	8,15,17,3,4	3176,3980,2168,589,555	786,5193,5080,181,8845	2483,2086,232,533,246	173,3312,3312,92,7040	0,0,0,0,0	10,17,19,5,6
ENSG00000223643.6_4	chr1	17177752	17179624	-	837	0	0	0	0	0	0	0	0	0	0	0	0	RP11-108M9.1	ENSG00000223643.6_4	2	ENST00000414340.6_1,ENST00000422345.1_1	3,4	551,731	991,1077	294,294	598,628	0,0	5,6
ENSG00000230239.1_5	chr1	17181902	17185779	+	882	0	0	1	0	0	0	0	0	0	1	1	0	RP11-108M9.2	ENSG00000230239.1_5	1	ENST00000414128.1_5	3	879	2998	528	1809	0	-1
ENSG00000263811.1	chr1	17185444	17185516	-	73	0	0	0	0	0	0	0	0	0	0	0	0	MIR3675	ENSG00000263811.1	1	ENST00000583661.1	1	72	0	72	0	0	3
ENSG00000228549.3_5	chr1	17197440	17200587	+	2963	1	1	3	1	5	3	1	0	0	6	1	3	RP11-108M9.3	ENSG00000228549.3_5	5	ENST00000438002.1_1,ENST00000619677.1_1,ENST00000451828.1_1,ENST00000453554.1_1,ENST00000457856.1_1	2,2,2,2,2	2518,826,432,1544,473	616,4,1351,216,580	2162,434,348,1223,369	616,4,1351,216,580	0,0,0,0,0	-1,-1,-1,-1,-1
ENSG00000238142.1_4	chr1	17215033	17216144	-	508	0	1	0	0	0	1	0	0	0	0	0	0	RP11-108M9.4	ENSG00000238142.1_4	3	ENST00000422124.1_1,ENST00000416869.1_1,ENST00000457075.1_1	2,2,2	404,334,344	431,766,763	247,240,243	431,766,763	0,0,0	4,4,4
ENSG00000235241.1_4	chr1	17215590	17216097	+	508	0	0	0	0	0	0	0	0	0	0	0	0	RP11-108M9.5	ENSG00000235241.1_4	1	ENST00000453917.1_1	1	507	0	507	0	0	-1
ENSG00000207005.1	chr1	17222475	17222638	+	164	14	30	13	16	18	8	7	0	1	104	142	138	RNU1-2	ENSG00000207005.1	1	ENST00000384278.1	1	163	0	163	0	0	-1
ENSG00000272426.1_4	chr1	17230834	17231271	-	438	8	12	7	7	9	3	5	0	0	2	6	7	RP11-108M9.6	ENSG00000272426.1_4	1	ENST00000606899.1_2	1	437	0	437	0	0	3
ENSG00000117122.13_5	chr1	17300997	17307330	-	2915	7	13	26	13	12	11	52	0	1	23	33	26	MFAP2	ENSG00000117122.13_5	6	ENST00000375534.7_4,ENST00000490075.5_1,ENST00000375535.3_4,ENST00000476788.5_1,ENST00000478684.5_1,ENST00000492598.1_1	8,6,9,6,5,4	962,2365,1251,538,652,677	2812,3754,5082,4432,1491,1388	521,1606,521,215,374,296	1042,2273,2273,2273,1039,1039	0,0,0,0,0,0	8,8,9,8,7,6
ENSG00000226526.1_4	chr1	17305421	17331586	+	636	0	0	0	0	0	1	0	0	0	0	0	0	RP1-37C10.3	ENSG00000226526.1_4	1	ENST00000446261.1_1	2	634	25531	448	25531	0	-1
ENSG00000159363.17_3	chr1	17312453	17338423	-	5253	1216	1051	1171	750	1430	1138	779	6	58	1225	1066	1179	ATP13A2	ENSG00000159363.17_3	15	ENST00000326735.12_1,ENST00000341676.9_2,ENST00000452699.5_1,ENST00000466561.1_1,ENST00000502418.1_1,ENST00000503552.1_1,ENST00000463860.5_1,ENST00000502860.1_1,ENST00000617114.4_1,ENST00000509392.1_1,ENST00000506174.5_1,ENST00000510069.5_1,ENST00000511957.5_1,ENST00000508222.5_1,ENST00000509619.1_1	29,27,29,9,7,7,7,5,14,2,6,10,7,8,6	3811,3654,3952,1842,1194,767,1632,682,1709,570,567,952,562,554,564	22003,22303,22018,4057,2828,5341,3728,3750,14360,90,3658,4751,4241,4558,2881	400,400,400,493,377,188,677,305,305,440,155,182,129,114,182	5951,5951,5951,1447,1217,3395,2836,2836,5951,90,2836,1959,1959,1959,1959	0,0,0,0,6,0,0,0,0,0,0,0,0,0,0	29,27,29,11,7,9,9,7,14,4,8,12,9,10,8
ENSG00000117118.9_2	chr1	17345217	17380665	-	2462	1314	1789	1822	1769	1535	1558	1417	5	2	916	886	866	SDHB	ENSG00000117118.9_2	8	ENST00000375499.7_1,ENST00000485092.5_1,ENST00000475049.5_1,ENST00000485515.5_1,ENST00000491274.5_1,ENST00000475506.1_1,ENST00000463045.2_1,ENST00000466613.2_1	8,2,3,7,6,4,5,3	1145,634,394,692,643,546,697,825	34303,3650,4014,30707,20603,16675,24042,20676	236,428,206,127,136,209,233,615	11616,3650,3650,11616,11616,11616,11616,11616	0,0,0,0,0,0,0,0	8,4,5,9,8,6,7,5
ENSG00000117115.12_2	chr1	17393256	17445930	-	5984	0	0	0	0	0	0	0	0	0	0	1	0	PADI2	ENSG00000117115.12_2	4	ENST00000375486.8_1,ENST00000479534.5_1,ENST00000466151.1_1,ENST00000375481.1_1	16,4,7,11	4329,2385,3605,1596	48345,5366,12035,38808	2516,1677,1491,384	14219,3365,3441,14219	0,0,0,0	16,6,9,11
ENSG00000252180.1	chr1	17484692	17484779	+	88	0	0	0	0	0	0	0	0	0	0	0	0	Y_RNA	ENSG00000252180.1	1	ENST00000516371.1	1	87	0	87	0	0	-1
ENSG00000204362.6_4	chr1	17516278	17524112	+	4676	0	0	0	0	0	0	0	0	0	0	0	0	RP11-380J14.1	ENSG00000204362.6_4	2	ENST00000412427.1_1,ENST00000634972.1_1	3,4	4673,586	3161,6012	4326,200	3035,3035	0,0	-1,-1
ENSG00000282843.1_4	chr1	17519727	17528228	-	1228	0	0	0	0	0	0	0	0	0	0	0	0	RP11-380J14.4	ENSG00000282843.1_4	1	ENST00000635428.1_1	5	1223	7278	565	3843	0	7
ENSG00000142623.9_2	chr1	17531621	17572500	+	4903	0	0	0	0	0	0	0	0	0	0	0	0	PADI1	ENSG00000142623.9_2	3	ENST00000375471.4_1,ENST00000483501.1_1,ENST00000460293.1_1	16,4,2	3830,509,3122	37049,2162,3250	1995,206,1994	16981,1383,3250	1976,0,0	1,-1,-1
ENSG00000142619.4_2	chr1	17575593	17610728	+	3189	0	0	0	0	0	0	1	0	0	6	5	1	PADI3	ENSG00000142619.4_2	1	ENST00000375460.3_1	16	3173	31962	1387	10349	1979	1
ENSG00000266634.1	chr1	17604384	17604470	+	87	0	0	0	0	0	0	0	0	0	0	0	0	MIR3972	ENSG00000266634.1	1	ENST00000582732.1	1	86	0	86	0	0	-1
ENSG00000159339.13_2	chr1	17634690	17690499	+	2971	0	0	1	1	1	0	0	0	1	1	0	2	PADI4	ENSG00000159339.13_2	5	ENST00000375453.5_1,ENST00000375448.4_1,ENST00000468945.1_1,ENST00000487048.5_1,ENST00000467001.1_1	4,16,2,4,5	837,2251,371,509,466	25764,53556,1802,8011,9653	472,482,266,154,154	22655,22655,1802,6485,5748	380,1976,0,0,0	1,1,-1,-1,-1
ENSG00000269468.1	chr1	17655507	17676070	-	339	0	0	0	0	0	0	0	0	0	0	0	0	AC004824.2	ENSG00000269468.1	1	ENST00000602074.1	6	333	20230	93	6567	0	8
ENSG00000276747.1_3	chr1	17698691	17728195	+	2396	0	0	0	0	1	1	0	0	0	1	0	0	PADI6	ENSG00000276747.1_3	1	ENST00000619609.1_1	17	2379	27125	494	6289	2068	1
ENSG00000227751.1_4	chr1	17733256	17733878	+	311	0	0	0	1	0	0	0	0	0	0	0	0	RP1-20B21.4	ENSG00000227751.1_4	1	ENST00000439577.1_1	2	309	313	244	313	0	-1
ENSG00000179051.13_3	chr1	17733256	17766220	-	4126	1899	2100	3516	2166	1090	826	1203	10	31	2902	3394	3533	RCC2	ENSG00000179051.13_3	3	ENST00000375436.8_1,ENST00000474892.1_1,ENST00000375433.3_1	13,2,12	4074,781,2018	28890,426,27867	2434,715,518	9031,426,9031	0,0,0	13,4,12
ENSG00000266727.1	chr1	17740127	17740190	-	64	116	127	228	143	70	51	70	1	2	232	220	244	AC004824.1	ENSG00000266727.1	1	ENST00000583469.1	1	63	0	63	0	0	3
ENSG00000239020.1	chr1	17776259	17776359	+	101	0	0	0	0	0	0	0	0	0	0	0	1	snoU13	ENSG00000239020.1	1	ENST00000458798.1	1	100	0	100	0	0	-1
ENSG00000074964.16_3	chr1	17866330	18024369	+	7817	1947	2014	2315	1691	2028	1915	2868	4	132	2368	2542	2548	ARHGEF10L	ENSG00000074964.16_3	9	ENST00000361221.7_1,ENST00000375415.5_1,ENST00000482892.1_1,ENST00000469726.5_1,ENST00000375408.7_3,ENST00000167825.5_1,ENST00000482359.1_1,ENST00000466782.1_1,ENST00000495593.1_1	29,27,3,20,20,16,3,4,2	4459,4008,536,4565,3665,3002,601,478,2259	153575,113088,2175,78207,75887,68859,3145,14434,1568	1021,801,406,1114,1020,1020,305,228,1233	40603,22978,1290,22978,22978,22978,2872,8252,1568	3812,3696,0,0,3139,1822,0,0,0	2,1,-1,-1,1,-1,-1,-1,-1
ENSG00000236648.1_5	chr1	18044182	18076473	+	610	0	0	0	1	0	0	0	0	0	1	0	0	RP11-473A10.2	ENSG00000236648.1_5	1	ENST00000430540.1_1	4	606	31685	301	27909	0	-1
ENSG00000117148.7_2	chr1	18081808	18153558	+	1864	3	3	21	17	4	4	11	0	1	4	4	10	ACTL8	ENSG00000117148.7_2	2	ENST00000375406.1_1,ENST00000617065.1_1	3,2	1858,1668	69892,2411	1296,1294	67481,2411	1099,1099	2,1
ENSG00000284653.1_2	chr1	18342206	18372106	+	2013	0	0	0	0	0	0	0	0	0	0	0	0	RP11-658E23.1	ENSG00000284653.1_2	1	ENST00000641892.1_1	4	2009	27891	727	19418	0	-1
ENSG00000261781.1_3	chr1	18392151	18400906	+	2471	0	0	0	0	0	0	0	0	2	0	0	0	RP11-174G17.2	ENSG00000261781.1_3	1	ENST00000569711.1_1	3	2468	6287	2192	3942	0	-1
ENSG00000117154.11_3	chr1	18434240	18704977	+	3085	0	0	0	0	0	0	0	0	0	0	0	0	IGSF21	ENSG00000117154.11_3	4	ENST00000251296.3_1,ENST00000412684.3_1,ENST00000497331.2_1,ENST00000473951.1_1	10,6,6,2	1933,924,1879,558	268803,96598,15237,405	474,474,863,438	119700,42905,10613,405	1394,0,0,0	1,-1,-1,-1
ENSG00000280222.1_5	chr1	18435883	18442355	+	6473	0	0	0	0	0	0	0	0	0	0	0	0	RP11-174G17.3	ENSG00000280222.1_5	1	ENST00000624418.1_1	1	6472	0	6472	0	0	-1
ENSG00000230035.2_4	chr1	18493423	18505840	-	430	0	0	0	0	0	0	0	0	0	0	0	0	RP11-174G17	ENSG00000230035.2_4	1	ENST00000419667.2_1	4	426	11991	294	8390	0	6
ENSG00000225387.1_4	chr1	18712323	18715008	+	491	0	0	0	0	0	0	0	0	0	0	0	0	RP11-422P22.1	ENSG00000225387.1_4	1	ENST00000420211.1_1	2	489	2196	391	2196	0	-1
ENSG00000179023.8_2	chr1	18807476	18812620	+	5145	140	136	228	164	287	262	341	0	3	232	170	147	KLHDC7A	ENSG00000179023.8_2	1	ENST00000400664.2_1	1	5144	0	5144	0	2333	1
ENSG00000235282.3_3	chr1	18839612	18839877	+	266	0	0	0	0	0	0	0	0	0	0	0	0	RP1-8B22.1	ENSG00000235282.3_3	1	ENST00000596113.1_1	1	265	0	265	0	0	-1
ENSG00000225478.2_4	chr1	18921908	18922130	+	223	0	0	0	0	0	0	0	0	0	0	0	1	RP1-8B22.2	ENSG00000225478.2_4	1	ENST00000450125.2_1	1	222	0	222	0	0	-1
ENSG00000009709.11_2	chr1	18957500	19075360	+	6313	0	0	0	0	0	0	0	0	1	0	0	0	PAX7	ENSG00000009709.11_2	3	ENST00000375375.7_1,ENST00000420770.6_1,ENST00000400661.3_1	8,9,8	2252,5529,1692	102880,111816,102886	682,4052,470	55383,55383,55383	1555,1509,1549	1,1,1
ENSG00000179002.5_3	chr1	19166093	19186176	-	2542	0	0	0	0	0	0	0	0	0	0	0	0	TAS1R2	ENSG00000179002.5_3	1	ENST00000375371.3_1	6	2536	17547	928	7489	0	6
ENSG00000255275.3_5	chr1	19175767	19247615	-	4369	2707	3253	2183	1866	2494	2412	1934	3	141	2417	3192	3310	RP13-279N23.2	ENSG00000255275.3_5	1	ENST00000494072.3_3	27	4342	67506	773	18346	3463	8
ENSG00000159423.16_3	chr1	19197924	19229275	-	3689	4930	5546	3670	3234	4391	4192	3339	6	154	4483	5580	5858	ALDH4A1	ENSG00000159423.16_3	6	ENST00000290597.9_1,ENST00000538839.5_2,ENST00000375341.7_1,ENST00000538309.5_1,ENST00000454547.1_1,ENST00000432718.1_1	16,14,15,15,4,6	2108,2943,3348,1925,481,838	29015,28153,28001,16233,2578,18775	360,1525,1525,224,149,262	12357,12357,12357,2851,2045,12357	0,0,0,0,0,0	15,14,15,15,6,8
ENSG00000265606.1	chr1	19209696	19209769	-	74	2	2	0	1	0	0	1	0	0	0	1	2	MIR4695	ENSG00000265606.1	1	ENST00000577305.1	1	73	0	73	0	0	3
ENSG00000221662.1	chr1	19223565	19223642	-	78	8	3	10	7	5	2	5	0	0	17	16	10	MIR1290	ENSG00000221662.1	1	ENST00000408735.1	1	77	0	77	0	0	3
ENSG00000169991.10_3	chr1	19230775	19283180	-	6188	828	984	1030	705	777	669	829	4	16	795	1337	1337	IFFO2	ENSG00000169991.10_3	3	ENST00000455833.6_2,ENST00000355609.8_1,ENST00000416166.1_3	9,3,8	6179,534,992	46226,3167,46366	4385,375,326	34547,1676,34547	0,272,223	9,3,8
ENSG00000272084.1_5	chr1	19398604	19402005	-	3402	203	224	280	112	361	310	297	2	8	695	478	474	RP5-1126H10.2	ENSG00000272084.1_5	1	ENST00000606379.1_1	1	3401	0	3401	0	0	3
ENSG00000127481.14_3	chr1	19401000	19536770	-	24675	10356	9862	10354	5679	15328	11381	12036	38	195	31610	18063	18248	UBR4	ENSG00000127481.14_3	17	ENST00000375254.7_1,ENST00000375225.7_1,ENST00000375224.1_1,ENST00000459947.5_1,ENST00000486515.1_1,ENST00000492606.1_1,ENST00000467272.6_1,ENST00000483922.1_1,ENST00000494503.1_1,ENST00000466969.1_1,ENST00000375218.3_1,ENST00000425413.5_1,ENST00000417040.1_1,ENST00000475973.1_1,ENST00000465036.1_1,ENST00000419533.1_1,ENST00000497018.1_1	106,4,21,3,3,2,8,3,4,2,5,21,41,4,2,30,2	15800,1529,3454,3870,533,312,883,540,594,508,4026,2933,6134,596,390,5553,181	119970,6201,26948,2918,2727,395,5882,1287,3398,1692,3183,27567,40708,2628,886,21268,1019	390,891,382,3330,329,185,190,377,178,345,2430,234,230,213,335,935,121	8933,3283,3842,1844,1844,395,2317,767,3130,1692,1584,8933,8933,968,886,2114,1019	0,0,0,0,0,0,0,0,0,0,0,0,0,0,0,0,0	106,4,21,5,5,4,10,5,6,4,5,23,43,6,4,32,4
ENSG00000266098.1	chr1	19410046	19410145	-	100	4	2	6	3	7	4	4	0	2	2	7	4	AL137127.1	ENSG00000266098.1	1	ENST00000582644.1	1	99	0	99	0	0	3
ENSG00000230424.1_4	chr1	19536995	19567198	+	507	14	18	12	13	12	15	22	0	0	15	23	29	RP1-43E13.2	ENSG00000230424.1_4	1	ENST00000437898.1_1	2	505	29698	447	29698	0	-1
ENSG00000127463.14_5	chr1	19542158	19578046	-	9623	5402	3902	5306	3236	5048	4274	3865	15	74	2903	3971	3832	EMC1	ENSG00000127463.14_5	13	ENST00000477853.5_1,ENST00000480380.1_1,ENST00000375199.7_2,ENST00000375208.7_3,ENST00000461353.1_1,ENST00000486405.1_3,ENST00000486238.1_3,ENST00000494770.6_2,ENST00000462505.1_1,ENST00000641089.1_1,ENST00000467423.2_2,ENST00000475079.1_1,ENST00000488681.1_1	23,3,23,22,2,5,4,6,3,6,2,4,2	6641,3889,5385,4062,2173,578,421,773,521,564,587,553,560	29247,1153,29250,29312,87,3558,2958,9053,2871,5312,312,7352,6385	3818,2608,2608,1334,1636,210,137,210,383,207,316,291,448	6385,1066,6385,6385,87,1814,1776,3744,1776,1890,312,6385,6385	0,0,0,0,0,48,166,0,0,0,0,0,0	23,5,23,22,4,5,3,8,5,8,4,2,4
ENSG00000053372.4_2	chr1	19578033	19586622	+	2822	1314	1732	2293	1983	1537	1409	1286	4	76	792	1447	1378	MRTO4	ENSG00000053372.4_2	3	ENST00000330263.4_1,ENST00000493700.1_1,ENST00000479559.1_1	8,3,3	2307,575,406	6282,3642,621	1447,413,272	2919,2534,493	712,0,0	1,-1,-1
ENSG00000211454.13_2	chr1	19592476	19600688	-	2768	23	19	38	28	20	22	33	0	8	21	35	25	AKR7L	ENSG00000211454.13_2	4	ENST00000457194.6_1,ENST00000429712.5_1,ENST00000420396.3_1,ENST00000493176.1_1	5,7,8,2	1979,1306,1232,543	5980,5785,5789,193	1479,358,331,521	2926,2926,2926,193	1369,0,0,0	5,7,8,4
ENSG00000162482.4_2	chr1	19609052	19615744	-	1710	30	14	46	33	36	29	60	0	2	36	32	24	AKR7A3	ENSG00000162482.4_2	1	ENST00000361640.4_1	7	1703	4989	754	2124	0	7
ENSG00000270728.1_4	chr1	19623574	19624397	+	525	0	0	0	0	0	0	0	0	0	0	0	0	RP4-657E11.10	ENSG00000270728.1_4	1	ENST00000604801.1_1	2	523	300	414	300	0	-1
ENSG00000053371.12_4	chr1	19630459	19638640	-	1781	1229	1535	1415	1298	1198	1216	1075	0	7	935	1003	1002	AKR7A2	ENSG00000053371.12_4	5	ENST00000235835.7_1,ENST00000330072.9_2,ENST00000489286.5_1,ENST00000481966.1_2,ENST00000492217.1_1	7,6,5,5,3	1355,1165,720,483,986	6826,6930,7021,3737,3378	421,387,220,129,523	3185,3185,3185,1632,3185	0,228,110,320,0	7,6,5,3,5
ENSG00000200403.1	chr1	19631570	19631676	-	107	6	8	9	6	11	5	13	0	0	4	7	6	RNU6-1099P	ENSG00000200403.1	1	ENST00000363533.1	1	106	0	106	0	0	3
ENSG00000040487.12_3	chr1	19638820	19655794	+	2686	1005	864	732	642	1393	1307	707	0	337	861	907	924	PQLC2	ENSG00000040487.12_3	6	ENST00000375155.7_1,ENST00000375153.7_1,ENST00000469076.5_1,ENST00000400548.6_1,ENST00000497827.1_1,ENST00000432465.1_3	9,8,8,8,8,5	1796,2145,1504,1540,1420,839	15178,14807,15450,15419,14838,2488	728,708,712,728,415,510	6792,6792,11744,11744,6792,948	869,869,106,675,300,379	3,2,3,3,2,-1
ENSG00000265192.1	chr1	19646299	19646554	-	256	0	0	0	0	0	0	0	0	0	0	0	0	RN7SL85P	ENSG00000265192.1	1	ENST00000583604.1	1	255	0	255	0	0	3
ENSG00000077549.17_4	chr1	19665270	19812033	-	3238	1904	2089	2377	2087	1610	1565	2093	0	13	1125	1647	1664	CAPZB	ENSG00000077549.17_4	9	ENST00000264203.7_1,ENST00000375144.5_1,ENST00000375142.5_3,ENST00000433834.5_2,ENST00000264202.7_3,ENST00000459967.6_1,ENST00000457768.5_1,ENST00000489607.5_1,ENST00000482808.1_1	9,8,10,9,9,5,4,5,5	2059,1560,1676,1453,849,574,428,483,655	144678,79412,144986,143852,145098,128310,27924,62139,110658	841,838,794,474,141,141,121,121,280	36106,34035,65686,64440,65686,99810,20977,34035,65686	0,0,0,0,0,0,0,0,0	9,8,9,9,9,7,6,7,7
ENSG00000240490.2	chr1	19750878	19751163	+	286	0	0	0	0	3	0	1	0	1	1	2	1	RN7SL277P	ENSG00000240490.2	1	ENST00000481521.2	1	285	0	285	0	0	-1
ENSG00000201609.1	chr1	19837087	19837227	+	141	0	0	0	0	0	0	0	0	0	0	0	0	RNU4-28P	ENSG00000201609.1	1	ENST00000364739.1	1	140	0	140	0	0	-1
ENSG00000239027.1	chr1	19858664	19858768	-	105	0	0	0	0	0	0	0	0	0	0	0	0	snoU13	ENSG00000239027.1	1	ENST00000458906.1	1	104	0	104	0	0	3
ENSG00000235185.1_4	chr1	19918296	19923326	-	207	0	0	1	0	0	0	0	0	0	1	1	2	RP5-1056L3.1	ENSG00000235185.1_4	1	ENST00000416470.1_1	2	205	4825	122	4825	0	4
ENSG00000173436.13_3	chr1	19923471	19956315	+	5227	631	801	1050	694	760	592	609	0	278	733	1086	1121	MINOS1	ENSG00000173436.13_3	10	ENST00000617872.4_1,ENST00000486890.5_1,ENST00000322753.6_1,ENST00000498067.1_1,ENST00000462646.5_1,ENST00000467029.5_1,ENST00000481464.5_1,ENST00000498642.5_1,ENST00000479642.1_1,ENST00000485362.1_1	3,4,4,2,4,5,5,5,2,5	3675,673,3708,479,331,578,652,664,574,433	29169,26134,29122,725,26225,29044,28938,28882,3678,29103	3434,316,3433,361,114,236,242,240,517,219	26365,21129,24991,725,17392,20149,21129,24991,3678,24247	186,0,233,0,0,0,0,0,0,0	1,-1,1,-1,-1,-1,-1,-1,-1,-1
ENSG00000158747.14_4	chr1	19923473	19984949	+	3596	377	371	603	450	325	293	321	0	13	677	548	570	NBL1	ENSG00000158747.14_4	14	ENST00000602662.1_4,ENST00000428975.5_4,ENST00000289749.6_3,ENST00000451758.5_4,ENST00000622566.4_2,ENST00000439664.5_2,ENST00000621723.4_2,ENST00000375136.7_2,ENST00000425400.5_4,ENST00000618761.4_2,ENST00000439278.5_3,ENST00000615215.4_2,ENST00000427894.5_4,ENST00000548815.2_2	4,4,4,4,4,4,4,4,4,4,3,4,4,4	1619,542,727,618,2105,584,2129,2168,524,2047,567,2156,569,1949	59457,15837,13169,12941,12941,12612,12612,12120,11036,11036,9102,10533,8896,8896	1190,188,263,216,1590,240,1590,1586,188,1590,267,1590,210,1590	57902,14282,11614,11386,11386,11057,11057,10565,9481,9481,8978,8978,7341,7341	543,0,647,0,543,0,543,543,0,543,0,644,0,543	2,2,1,2,2,2,2,2,2,2,1,1,2,2
ENSG00000270136.6_4	chr1	19923561	19983420	+	1276	551	690	903	614	625	478	511	0	45	667	839	871	MINOS1-NBL1	ENSG00000270136.6_4	3	ENST00000602384.5_4,ENST00000602293.5_4,ENST00000602450.1_4	10,9,5	989,811,585	58857,59047,59273	188,188,188	24991,20487,54040	212,209,138	-1,2,-1
ENSG00000226396.1_4	chr1	19934608	19935062	+	455	30	30	53	41	23	24	31	0	1	43	49	47	RP5-1056L3.3	ENSG00000226396.1_4	1	ENST00000457263.1_1	1	454	0	454	0	0	-1
ENSG00000158748.3_2	chr1	19991780	20006055	+	1984	0	0	0	0	0	0	0	0	0	1	0	1	HTR6	ENSG00000158748.3_2	1	ENST00000289753.1_1	3	1981	12294	1180	12100	1320	1
ENSG00000162542.13_3	chr1	20008706	20126438	-	4054	122	140	184	135	138	143	230	0	1	186	182	179	TMCO4	ENSG00000162542.13_3	8	ENST00000294543.10_3,ENST00000375127.5_3,ENST00000489814.5_1,ENST00000494342.1_1,ENST00000489135.5_1,ENST00000496528.5_1,ENST00000462171.1_1,ENST00000488449.1_1	16,16,5,2,9,7,4,5	2958,2387,1717,501,1141,797,569,642	114746,114717,54460,6217,42251,51985,20777,27952	1231,474,1202,442,184,186,291,186	36487,36487,36487,6217,14776,14776,14776,10954	0,0,0,0,0,0,0,0	16,16,7,4,11,9,6,7
ENSG00000178828.6_2	chr1	20140522	20141771	-	1250	1	2	0	1	0	0	2	0	0	4	2	4	RNF186	ENSG00000178828.6_2	1	ENST00000375121.3_1	1	1249	0	1249	0	-679	1
ENSG00000235434.1_4	chr1	20140860	20145995	+	447	0	0	0	0	0	0	0	0	0	0	0	0	RP11-91K11.2	ENSG00000235434.1_4	1	ENST00000454736.1_1	2	445	4690	259	4690	0	-1
ENSG00000169914.5_2	chr1	20209006	20239438	+	6767	606	610	826	620	767	712	597	4	56	712	771	766	OTUD3	ENSG00000169914.5_2	3	ENST00000375120.3_1,ENST00000466697.1_1,ENST00000481686.1_1	8,3,2	6389,462,267	24043,6895,112	5375,275,216	7651,3835,112	1189,0,0	1,-1,-1
ENSG00000188784.4_2	chr1	20246502	20250110	-	785	0	3	1	1	0	1	0	0	0	0	3	0	PLA2G2E	ENSG00000188784.4_2	1	ENST00000375116.3_1	4	781	2827	440	1849	0	4
ENSG00000242688.2	chr1	20297462	20297760	+	299	0	0	0	0	0	0	0	0	0	2	0	0	RN7SL304P	ENSG00000242688.2	1	ENST00000488028.2	1	298	0	298	0	0	-1
ENSG00000188257.10_2	chr1	20301924	20306909	-	1685	45	117	15	12	2	2	9	1	3	125	39	37	PLA2G2A	ENSG00000188257.10_2	7	ENST00000469162.5_1,ENST00000400520.7_1,ENST00000496748.1_1,ENST00000375111.7_1,ENST00000491964.5_1,ENST00000482011.1_1,ENST00000461140.1_1	5,5,3,6,6,6,2	866,969,1303,964,897,729,571	3310,3342,2873,4014,4045,4014,250	412,411,864,405,378,170,333	2172,2172,2172,2172,2172,2172,250	0,0,0,0,0,0,0	7,5,5,6,8,8,4
ENSG00000127472.10_2	chr1	20354672	20417683	+	2607	0	0	0	0	0	0	0	0	0	0	0	1	PLA2G5	ENSG00000127472.10_2	8	ENST00000486277.5_1,ENST00000465698.5_1,ENST00000460175.5_1,ENST00000469069.5_1,ENST00000489871.5_1,ENST00000498348.1_1,ENST00000375108.3_1,ENST00000478803.1_1	10,8,7,7,8,4,5,7	1861,1505,957,819,1084,479,1156,942	61150,61223,56836,60550,61170,41364,19804,19591	622,590,275,183,212,161,600,260	17393,30923,30923,30923,30923,30923,14356,7923	0,0,0,0,0,0,413,0	-1,-1,-1,-1,-1,-1,2,-1
ENSG00000117215.14_2	chr1	20438432	20446059	-	2681	0	0	0	0	0	0	0	0	0	0	0	0	PLA2G2D	ENSG00000117215.14_2	2	ENST00000375105.7_1,ENST00000617227.1_1	4,3	2668,1853	4950,5056	2320,1602	2982,2982	0,0	4,3
ENSG00000158786.4_2	chr1	20465819	20476879	+	6440	0	0	0	0	0	0	0	0	0	0	0	0	PLA2G2F	ENSG00000158786.4_2	2	ENST00000375102.3_1,ENST00000465062.1_1	5,2	2718,4127	8342,623	2196,3914	3501,623	631,0	1,-1
ENSG00000227066.1_4	chr1	20480831	20487061	+	2639	2	0	1	1	2	0	0	0	2	1	1	1	RP3-340N1.2	ENSG00000227066.1_4	2	ENST00000417884.1_1,ENST00000431027.1_2	2,2	1081,2491	5149,383	956,1555	5149,383	0,0	-1,-1
ENSG00000187980.6_2	chr1	20487746	20503917	-	3298	0	0	0	0	0	0	0	0	0	0	0	0	PLA2G2C	ENSG00000187980.6_2	3	ENST00000429261.2_1,ENST00000495760.2_1,ENST00000247992.5_1	4,2,3	3245,366,450	12926,11711,10753	2904,204,187	8637,11711,8637	0,0,0	4,4,3
ENSG00000225986.1_4	chr1	20510735	20512979	-	510	0	0	0	0	0	0	0	0	0	1	0	1	RP3-340N1.5	ENSG00000225986.1_4	1	ENST00000442226.1_1	2	508	1736	382	1736	0	4
ENSG00000162543.5_2	chr1	20512578	20522541	+	5571	3	1	1	1	0	0	0	0	0	12	2	0	UBXN10	ENSG00000162543.5_2	1	ENST00000375099.3_1	2	5569	4394	5501	4394	842	2
ENSG00000228105.1_3	chr1	20569588	20571148	+	480	0	0	0	0	0	0	0	0	0	0	0	0	RP3-340N1.6	ENSG00000228105.1_3	1	ENST00000435552.1_1	2	478	1082	359	1082	0	-1
ENSG00000284710.1_2	chr1	20598511	20601498	+	1639	0	0	0	0	0	0	0	0	0	0	0	0	RP3-340N1.7	ENSG00000284710.1_2	2	ENST00000641574.1_1,ENST00000641138.1_1	2,3	829,1545	752,981	739,1224	752,586	0,0	-1,-1
ENSG00000158816.15_3	chr1	20617412	20681387	+	6377	0	0	0	0	0	0	0	1	3	1	0	0	VWA5B1	ENSG00000158816.15_3	8	ENST00000485375.6_1,ENST00000375079.6_1,ENST00000289815.12_1,ENST00000473325.5_1,ENST00000530722.5_1,ENST00000534075.1_2,ENST00000467486.5_3,ENST00000525343.1_1	22,22,22,15,3,4,12,10	3754,3837,4453,3710,538,537,2104,1798	59578,59507,59522,44575,9323,10794,19232,19506	494,506,1137,1247,268,164,494,465	19488,19488,19488,19488,7227,7364,4596,4596	551,3642,3627,892,0,0,1325,0	2,2,2,2,2,2,-1,-1
ENSG00000226664.1_4	chr1	20620704	20649680	-	229	0	0	0	0	0	0	0	0	0	0	0	0	RP4-745E8.2	ENSG00000226664.1_4	1	ENST00000444923.1_1	2	227	28749	143	28749	0	4
ENSG00000236963.6_4	chr1	20687072	20757727	-	3394	3	0	0	0	1	0	1	0	1	5	1	1	RP4-749H3.1	ENSG00000236963.6_4	5	ENST00000426428.5_1,ENST00000635577.1_1,ENST00000635564.1_1,ENST00000418743.5_1,ENST00000423486.1_1	12,7,8,5,5	2981,1019,1000,780,349	65222,29681,29719,29854,32169	1462,304,246,304,119	22315,19774,22315,22315,24908	0,0,0,0,0	14,9,10,7,7
ENSG00000226487.1_5	chr1	20738797	20739746	-	376	0	0	1	0	0	0	0	0	0	0	0	0	RP4-749H3.2	ENSG00000226487.1_5	1	ENST00000421114.1_1	3	373	576	178	490	0	5
ENSG00000284641.1_2	chr1	20802715	20805430	+	1340	3	6	1	2	1	1	0	0	0	1	3	4	RP4-749H3.4	ENSG00000284641.1_2	2	ENST00000641552.1_1,ENST00000641937.1_1	2,2	984,1154	1587,1153	801,945	1587,1153	0,0	-1,-1
ENSG00000284743.1_2	chr1	20805272	20806890	-	674	16	18	17	26	14	15	17	0	0	23	26	32	RP4-749H3.3	ENSG00000284743.1_2	1	ENST00000641097.1_1	2	672	946	572	946	0	4
ENSG00000162545.5_2	chr1	20808884	20812713	-	2615	1194	1282	1591	1352	1244	1232	1511	3	59	1974	1006	1029	CAMK2N1	ENSG00000162545.5_2	2	ENST00000375078.3_1,ENST00000489020.1_1	2,2	2334,810	1495,648	1328,532	1495,648	0,0	2,4
ENSG00000090432.6_2	chr1	20825941	20834654	-	2438	1014	991	1078	922	1231	1084	892	2	8	907	1155	1155	MUL1	ENSG00000090432.6_2	1	ENST00000264198.4_1	4	2434	6279	1971	4596	0	4
ENSG00000215520.3_3	chr1	20852482	20853244	+	763	0	0	0	0	0	0	0	0	0	0	0	0	RP11-401M16.3	ENSG00000215520.3_3	1	ENST00000443195.1_1	1	762	0	762	0	0	-1
ENSG00000183114.7_2	chr1	20878932	20881503	+	2572	97	109	138	94	110	77	172	0	5	95	112	122	FAM43B	ENSG00000183114.7_2	1	ENST00000332947.5_1	1	2571	0	2571	0	989	1
ENSG00000158825.5_2	chr1	20915441	20945401	+	963	46	48	4	1	98	60	6	0	0	40	18	18	CDA	ENSG00000158825.5_2	2	ENST00000375071.3_1,ENST00000461985.1_1	4,3	959,759	29001,29058	456,451	15645,15645	437,0	1,-1
ENSG00000158828.7_3	chr1	20959948	20978004	+	4836	578	708	441	350	741	650	576	3	4	420	494	502	PINK1	ENSG00000158828.7_3	3	ENST00000321556.4_1,ENST00000492302.1_1,ENST00000400490.2_1	8,5,4	2652,3816,1654	15404,9371,4348	1077,1863,1076	4498,4498,2782	1738,0,0	1,-1,-1
ENSG00000117242.7_5	chr1	20969150	20978686	-	4443	1541	1352	1482	1236	1271	1272	1094	1	1112	868	1170	1114	RP11-401M16.7	ENSG00000117242.7_5	1	ENST00000451424.1_1	3	4440	5096	3878	2629	0	5
ENSG00000257033.1	chr1	20976856	20977207	-	348	114	113	151	118	99	101	89	0	0	80	128	129	AL391357.1	ENSG00000257033.1	1	ENST00000535128.1	2	346	5	194	5	0	4
ENSG00000244038.9_5	chr1	20978260	20988037	-	2721	12400	11098	10168	9178	9197	8888	8100	14	712	6361	7591	7363	DDOST	ENSG00000244038.9_5	6	ENST00000415136.6_3,ENST00000602624.6_3,ENST00000375048.7_3,ENST00000475210.1_1,ENST00000464364.1_3,ENST00000477229.1_1	11,11,11,2,4,2	2115,1952,2068,326,498,764	7662,7662,7662,124,5450,206	761,751,751,233,191,592	4694,4694,4694,124,5102,206	0,0,0,0,0,0	11,11,11,4,6,4
ENSG00000117245.12_3	chr1	20990507	21044510	-	4470	2	7	6	3	15	7	5	0	1	40	17	14	KIF17	ENSG00000117245.12_3	9	ENST00000493818.1_1,ENST00000477167.5_1,ENST00000490034.5_1,ENST00000375044.5_1,ENST00000400463.7_1,ENST00000247986.2_1,ENST00000462858.5_1,ENST00000498225.1_1,ENST00000463389.1_1	2,6,9,15,15,15,6,6,2	392,1799,1922,3557,3716,3954,918,870,320	184,19374,32503,49920,50050,50047,18151,15076,684	202,748,748,748,748,746,258,258,180	184,10457,10457,10457,10457,10457,10457,10457,684	0,0,0,0,0,0,0,0,0	4,8,11,15,15,15,8,8,4
ENSG00000235432.1_4	chr1	21019227	21020506	-	479	1	0	0	0	1	0	0	0	2	0	1	0	RP5-930J4.5	ENSG00000235432.1_4	1	ENST00000440621.1_1	4	475	804	148	351	0	6
ENSG00000189410.11_4	chr1	21046225	21059330	-	4423	377	315	149	109	436	409	91	1	17	356	207	239	SH2D5	ENSG00000189410.11_4	7	ENST00000375031.5_1,ENST00000460804.5_1,ENST00000444387.6_3,ENST00000447746.6_2,ENST00000518294.5_3,ENST00000517430.5_2,ENST00000519434.1_3	9,6,10,5,6,5,5	3696,3057,1924,539,505,559,519	9212,10048,9084,7138,7701,5100,3624	2263,2263,467,146,146,143,163	4578,8129,4095,4095,4678,3362,2660	0,0,0,0,0,0,0	9,8,10,7,8,7,7
ENSG00000233069.1_4	chr1	21059373	21060445	+	299	5	3	0	0	5	6	0	0	0	1	1	0	RP5-930J4.2	ENSG00000233069.1_4	1	ENST00000436642.1_1	2	297	775	152	775	0	-1
ENSG00000127483.17_3	chr1	21069154	21113816	-	7442	4300	4097	5719	4756	4385	4587	5623	12	773	5727	5199	5022	HP1BP3	ENSG00000127483.17_3	14	ENST00000312239.9_1,ENST00000375003.6_1,ENST00000488722.5_1,ENST00000491748.1_1,ENST00000419948.5_1,ENST00000438032.5_1,ENST00000424732.5_1,ENST00000417710.5_1,ENST00000487117.1_1,ENST00000375000.5_1,ENST00000437575.5_1,ENST00000419490.5_1,ENST00000414993.1_1,ENST00000443615.1_1	13,9,5,3,7,9,8,5,3,5,4,3,4,2	3925,4813,634,703,752,1150,962,567,1595,923,469,535,723,555	40102,27510,5978,3956,28237,28956,29151,12129,3496,10062,10156,9404,9209,6275	2430,2409,347,528,159,195,159,195,1300,350,190,399,399,480	8121,8121,2068,2068,8121,8121,8121,5646,3062,5974,6655,6342,5713,6275	0,0,0,0,0,0,0,0,0,0,0,0,0,0	13,9,7,5,9,11,10,7,5,5,6,5,6,4
ENSG00000203394.2	chr1	21069480	21070455	+	572	0	0	0	0	0	0	0	0	0	0	0	0	RP5-930J4.4	ENSG00000203394.2	1	ENST00000413451.1	2	570	405	445	405	0	-1
ENSG00000075151.20_3	chr1	21132785	21503381	-	9596	2869	2957	2893	2260	3094	2839	2233	11	15	1791	1654	1610	EIF4G3	ENSG00000075151.20_3	14	ENST00000374935.7_1,ENST00000264211.12_1,ENST00000602326.5_1,ENST00000400422.6_1,ENST00000634879.1_2,ENST00000435383.1_1,ENST00000374933.3_1,ENST00000485722.1_1,ENST00000356916.7_1,ENST00000438975.5_1,ENST00000411888.5_1,ENST00000476088.1_1,ENST00000463775.1_1,ENST00000634778.1_1	33,31,35,35,34,5,5,2,15,10,9,4,4,2	5534,5771,6161,5727,5291,611,1131,447,2164,1260,1113,402,707,1341	365062,238753,364206,364116,364226,22230,47156,11667,231331,225618,206270,8996,46372,364	1208,1030,1017,839,839,172,525,225,839,183,183,179,287,1244	86962,48058,86962,86962,86962,11584,36288,11667,56578,86962,86962,7235,24147,364	0,0,0,0,0,0,0,0,0,0,0,0,0,0	33,31,35,35,34,7,7,4,15,12,11,6,6,4
ENSG00000251914.1	chr1	21167734	21167795	+	62	0	0	0	0	0	0	0	0	0	0	0	0	RNU7-200P	ENSG00000251914.1	1	ENST00000516105.1	1	61	0	61	0	0	-1
ENSG00000221808.1	chr1	21314807	21314925	-	119	8	3	4	1	6	6	3	0	3	3	5	4	MIR1256	ENSG00000221808.1	1	ENST00000408881.1	1	118	0	118	0	0	3
ENSG00000233072.1_3	chr1	21330043	21330427	-	385	11	15	13	9	15	8	5	0	0	33	16	13	RP11-487E1.1	ENSG00000233072.1_3	1	ENST00000420703.1_1	1	384	0	384	0	0	3
ENSG00000236073.2_4	chr1	21400132	21400246	-	115	17	7	8	8	13	11	4	0	1	36	22	30	RP11-487E1.2	ENSG00000236073.2_4	1	ENST00000431514.2_1	1	114	0	114	0	0	3
ENSG00000235112.1_3	chr1	21487968	21488574	+	296	0	0	0	0	0	0	0	0	1	0	0	0	RP11-628K18.1	ENSG00000235112.1_3	1	ENST00000430808.1_1	2	294	312	201	312	0	-1
ENSG00000266867.1	chr1	21503059	21503122	-	64	3	3	3	4	5	0	2	0	1	2	0	1	AL031005.1	ENSG00000266867.1	1	ENST00000584440.1	1	63	0	63	0	0	3
ENSG00000117298.14_3	chr1	21543740	21671997	-	7265	1422	1286	1411	887	843	553	2194	7	210	1907	1726	1817	ECE1	ENSG00000117298.14_3	13	ENST00000415912.6_1,ENST00000357071.8_2,ENST00000531334.1_1,ENST00000374893.10_3,ENST00000436918.6_1,ENST00000264205.10_3,ENST00000526194.5_1,ENST00000470394.1_1,ENST00000528294.1_1,ENST00000473505.5_1,ENST00000481130.6_1,ENST00000527991.2_1,ENST00000463334.2_1	19,17,2,19,18,18,14,4,5,4,4,4,4	5080,3746,651,2465,2310,2363,2158,482,571,670,574,576,503	123177,57219,1616,68165,68260,67957,55200,4298,17997,19086,25679,21016,71799	2884,1547,334,272,237,212,556,216,191,238,182,270,200	55220,12307,1616,12307,12307,12307,12307,2189,8584,12307,10738,10738,54781	0,0,0,0,0,0,0,0,0,0,0,0,0	19,17,4,19,18,18,16,6,7,6,6,6,6
ENSG00000236936.1_4	chr1	21592575	21593744	+	723	2	3	1	2	2	2	3	0	0	2	2	4	RP3-329E20.2	ENSG00000236936.1_4	1	ENST00000416959.1_1	3	720	449	403	355	0	-1
ENSG00000231105.1_4	chr1	21619783	21626267	+	2479	3	2	1	0	0	1	3	0	0	0	0	1	RP5-1071N3.1	ENSG00000231105.1_4	1	ENST00000449034.1_1	3	2476	4008	1747	3817	0	-1
ENSG00000236216.5_3	chr1	21724480	21724855	+	376	0	0	0	0	0	0	0	0	0	0	0	0	RP11-560O15.1	ENSG00000236216.5_3	1	ENST00000486095.1_1	1	375	0	375	0	0	-1
ENSG00000228823.1_4	chr1	21737953	21739786	-	649	0	0	0	0	0	0	0	0	0	0	0	0	RP11-293F5.8	ENSG00000228823.1_4	1	ENST00000443127.1_1	2	647	1186	529	1186	0	4
ENSG00000236009.1_4	chr1	21742391	21743985	+	761	0	0	0	0	0	0	0	0	0	0	0	0	RP11-293F5.1	ENSG00000236009.1_4	2	ENST00000444647.1_1,ENST00000423921.1_1	3,3	604,602	990,450	293,297	599,353	0,0	-1,-1
ENSG00000227001.3_3	chr1	21751118	21754460	-	661	13	13	15	10	10	7	12	0	1	3	4	5	RP11-293F5.2	ENSG00000227001.3_3	1	ENST00000453025.1_1	5	656	2686	203	717	0	7
ENSG00000187952.9_3	chr1	21754796	21756029	+	1234	2	4	7	11	6	2	6	0	0	2	3	3	HS6ST1P	ENSG00000187952.9_3	1	ENST00000481504.2_1	1	1233	0	1233	0	0	-1
ENSG00000186543.7_3	chr1	21760811	21764051	+	830	1	1	0	0	0	0	0	0	0	1	0	0	RP11-293F5.4	ENSG00000186543.7_3	1	ENST00000436658.1_1	5	825	2415	258	756	0	-1
ENSG00000142794.18_3	chr1	21766621	21811498	+	6812	228	252	286	294	249	228	208	2	6	183	206	147	NBPF3	ENSG00000142794.18_3	13	ENST00000454000.6_1,ENST00000475869.2_1,ENST00000318220.10_1,ENST00000478653.6_1,ENST00000485941.2_1,ENST00000342104.9_2,ENST00000486229.5_1,ENST00000318249.9_1,ENST00000434838.6_3,ENST00000467103.2_1,ENST00000619554.1_2,ENST00000469876.5_1,ENST00000477050.1_1	14,3,18,3,3,15,6,15,19,3,14,9,5	2119,482,4383,1414,918,3689,927,3576,2708,415,1817,972,545	41220,1745,40485,12754,5418,41047,27729,41011,35666,6451,13045,8958,6281	324,247,1862,933,445,1757,271,1757,275,227,269,208,190	25413,1326,20868,8154,4600,23469,20868,23469,8155,4572,3193,3193,3193	1679,0,160,0,0,1852,160,1888,160,139,1721,0,0	2,-1,2,-1,-1,2,2,2,1,1,2,-1,-1
ENSG00000176378.8_3	chr1	21786249	21786575	-	327	0	0	0	0	0	0	0	0	1	0	0	0	RP11-293F5.6	ENSG00000176378.8_3	1	ENST00000455962.2_1	1	326	0	326	0	0	3
ENSG00000162551.13_4	chr1	21835865	21904905	+	3007	1	2	2	1	0	1	1	0	2	4	8	6	ALPL	ENSG00000162551.13_4	7	ENST00000374840.7_2,ENST00000468526.1_1,ENST00000539907.5_1,ENST00000540617.5_2,ENST00000374832.5_2,ENST00000374830.2_3,ENST00000374829.2_1	12,5,10,11,12,4,4	2577,698,2231,2120,2181,729,1591	66463,54116,66742,66627,24552,6699,2330	1029,174,1016,792,629,348,1016	44461,51109,51109,51109,6484,5359,990	1564,0,1335,1400,1564,646,0	2,-1,2,2,2,-1,-1
ENSG00000233431.1_4	chr1	21912965	21917680	+	821	0	0	0	0	1	0	0	0	0	0	2	2	RP11-63N8.3	ENSG00000233431.1_4	1	ENST00000457706.1_1	2	819	3896	617	3896	0	-1
ENSG00000221781.1	chr1	21918904	21919041	-	138	0	0	0	0	0	0	0	0	0	0	0	0	AL359815.1	ENSG00000221781.1	1	ENST00000408854.1	1	137	0	137	0	0	3
ENSG00000076864.19_4	chr1	21922708	21995856	-	5755	713	733	780	540	458	339	1044	1	31	1076	773	798	RAP1GAP	ENSG00000076864.19_4	13	ENST00000290101.8_2,ENST00000374763.6_2,ENST00000374761.6_2,ENST00000471600.6_1,ENST00000374765.8_2,ENST00000611549.4_1,ENST00000542643.6_2,ENST00000495204.5_2,ENST00000374757.7_1,ENST00000317967.11_2,ENST00000447293.5_1,ENST00000482984.5_1,ENST00000464457.1_1	27,23,23,25,25,25,27,25,10,8,6,5,6	3557,3311,3295,3213,3246,4269,3399,2464,1318,592,423,326,403	69591,20509,23052,52386,69839,68809,69680,52364,37549,51409,34952,47314,45957	1049,1043,1043,1043,1043,1108,1042,256,511,184,173,106,106	23364,3217,3217,23364,23364,23364,23364,23364,23364,23364,23364,23364,23364	0,0,0,0,0,0,0,0,0,0,0,0,0	24,22,22,22,24,27,26,24,12,10,8,7,8
ENSG00000090686.15_2	chr1	22004791	22110099	-	9497	1884	2197	2024	1544	1976	1705	1721	8	47	2055	2418	2437	USP48	ENSG00000090686.15_2	15	ENST00000400301.5_2,ENST00000308271.13_1,ENST00000374732.7_1,ENST00000479177.1_1,ENST00000529637.5_1,ENST00000464577.1_1,ENST00000471752.1_1,ENST00000487880.2_1,ENST00000526044.5_1,ENST00000534705.5_1,ENST00000421625.6_1,ENST00000374730.2_1,ENST00000527823.5_1,ENST00000532737.1_1,ENST00000489108.1_1	26,27,15,2,27,5,2,4,4,4,11,5,4,5,2	4283,4568,3022,684,3201,2084,443,520,545,562,2807,565,550,675,441	100614,100459,43194,1369,100423,16639,5579,5014,8393,8292,52948,19014,28463,29516,25041	1141,860,1221,444,197,1347,333,197,197,162,868,195,162,248,322	25041,25041,11399,1369,25041,6277,5579,2396,4475,4475,25041,10442,24075,25041,25041	0,0,0,0,0,0,0,0,0,0,0,225,0,0,0	26,27,15,4,27,7,4,6,6,6,11,4,6,7,4
ENSG00000231978.2_4	chr1	22094762	22095068	+	307	0	0	0	0	0	0	0	0	0	0	0	0	RP11-132G19.3	ENSG00000231978.2_4	1	ENST00000434488.2_1	1	306	0	306	0	0	-1
ENSG00000187942.11_2	chr1	22138758	22151714	+	4490	0	0	0	0	0	0	0	0	0	0	0	1	LDLRAD2	ENSG00000187942.11_2	3	ENST00000344642.6_1,ENST00000543870.1_1,ENST00000484271.1_1	5,6,2	4007,1174,938	8949,10426,113	3019,425,824	5376,5376,113	814,814,0	1,1,-1
ENSG00000142798.18_3	chr1	22148738	22263790	-	18107	2033	1174	1604	969	1696	1339	2239	15	35	1586	580	629	HSPG2	ENSG00000142798.18_3	15	ENST00000486901.1_1,ENST00000374695.7_1,ENST00000481644.1_1,ENST00000635682.1_1,ENST00000471322.2_1,ENST00000374676.4_1,ENST00000453796.1_1,ENST00000493940.2_1,ENST00000644714.1_1,ENST00000427897.1_1,ENST00000498495.1_1,ENST00000480900.1_1,ENST00000412328.5_1,ENST00000374673.3_1,ENST00000439717.2_1	11,97,2,9,5,2,4,4,6,5,3,4,6,4,5	3575,14230,837,912,1597,409,617,580,702,584,485,496,822,534,632	4893,100822,128,2672,2204,3188,1145,2765,5958,1263,245,1064,8255,952,5823	1330,1243,650,144,958,228,269,279,197,232,317,305,254,254,325	3084,40845,128,891,1165,3188,755,1374,3076,501,162,647,5781,602,5228	0,0,0,0,0,85,0,0,0,0,0,0,0,0,0	13,97,4,11,7,2,6,6,8,7,5,6,8,6,7
ENSG00000232037.3_4	chr1	22234591	22235073	+	483	0	0	0	0	0	0	0	0	0	0	0	0	RP11-26H16.1	ENSG00000232037.3_4	1	ENST00000423231.1_1	1	482	0	482	0	0	-1
ENSG00000283234.1_4	chr1	22277172	22283364	-	1162	1	0	1	0	1	0	0	0	0	1	0	4	RP11-26H16.4	ENSG00000283234.1_4	2	ENST00000637118.1_1,ENST00000636906.1_1	2,1	1160,843	5032,0	971,843	5032,0	0,0	4,3
ENSG00000219073.7_2	chr1	22303514	22325135	+	1541	5	7	1	1	3	4	1	0	0	5	4	2	CELA3B	ENSG00000219073.7_2	4	ENST00000337107.10_1,ENST00000374666.1_1,ENST00000400277.2_1,ENST00000473526.1_1	8,5,5,4	889,492,991,356	11434,5392,16549,4732	152,134,491,152	2579,2522,11468,2251	805,0,538,0	1,1,-1,-1
ENSG00000264385.1	chr1	22305444	22305729	-	286	0	0	0	0	0	0	0	0	1	0	0	0	RN7SL421P	ENSG00000264385.1	1	ENST00000582599.1	1	285	0	285	0	0	3
ENSG00000263991.1	chr1	22313974	22314268	+	295	1	0	0	0	0	0	0	0	0	0	0	0	RN7SL386P	ENSG00000263991.1	1	ENST00000485776.2	1	294	0	294	0	0	-1
ENSG00000201919.1	chr1	22314309	22314412	+	104	0	0	0	0	0	0	0	0	0	0	0	0	RNU6-1022P	ENSG00000201919.1	1	ENST00000365049.1	1	103	0	103	0	0	-1
ENSG00000142789.19_2	chr1	22328149	22339032	+	1224	2	8	0	1	1	1	0	0	0	37	3	4	CELA3A	ENSG00000142789.19_2	3	ENST00000290122.7_1,ENST00000374663.1_1,ENST00000400271.2_1	8,4,4	879,645,353	9987,3763,4736	152,406,152	2593,2359,2265	805,362,225	1,1,-1
ENSG00000263582.1	chr1	22330078	22330361	-	284	0	0	0	0	0	0	0	0	0	0	0	0	RN7SL768P	ENSG00000263582.1	1	ENST00000584415.1	1	283	0	283	0	0	3
ENSG00000263929.1	chr1	22337143	22337437	+	295	0	0	0	0	0	0	0	0	0	1	0	0	RN7SL186P	ENSG00000263929.1	1	ENST00000466485.2	1	294	0	294	0	0	-1
ENSG00000201273.1	chr1	22337478	22337581	+	104	0	0	0	0	0	0	0	0	0	0	0	0	RNU6-776P	ENSG00000201273.1	1	ENST00000364403.1	1	103	0	103	0	0	-1
ENSG00000228397.2_3	chr1	22350483	22352541	-	1126	3	2	1	2	1	1	3	0	1	1	8	4	RP1-224A6.3	ENSG00000228397.2_3	2	ENST00000455966.2_1,ENST00000635097.1_1	3,3	699,1020	1359,466	455,448	998,361	0,0	5,5
ENSG00000218510.7_4	chr1	22351051	22357716	+	3764	330	301	447	400	335	321	350	0	187	378	297	281	RP1-224A6.4	ENSG00000218510.7_4	13	ENST00000635675.2_2,ENST00000434233.2_2,ENST00000634934.2_2,ENST00000634712.2_2,ENST00000635450.2_2,ENST00000634451.2_2,ENST00000420503.1_1,ENST00000416769.2_2,ENST00000642072.1_1,ENST00000404210.5_2,ENST00000641009.1_1,ENST00000452322.2_2,ENST00000642137.1_1	3,2,3,2,2,4,3,2,3,3,2,3,1	1401,927,1515,1386,945,683,768,1075,335,1186,1448,1388,221	5264,4908,4215,4335,4161,4423,4521,4637,4517,4505,3631,3676,0	943,743,943,939,608,337,520,943,121,943,1111,965,221	4908,4908,2746,4335,4161,2500,2746,4637,2746,2885,3631,1901,0	0,0,0,0,0,0,0,0,0,0,0,0,0	-1,-1,-1,-1,-1,-1,-1,-1,-1,-1,-1,-1,-1
ENSG00000070831.15_4	chr1	22379120	22419439	+	3598	7727	10254	8353	8437	7693	7819	7410	24	137	6434	9499	10106	CDC42	ENSG00000070831.15_4	5	ENST00000400259.5_4,ENST00000344548.7_4,ENST00000315554.12_4,ENST00000498236.1_1,ENST00000411827.1_1	6,7,6,7,5	2268,2249,1446,809,592	38028,38029,36669,36494,32901	1495,1518,861,197,154	25561,21352,25687,25687,24996	571,571,571,0,0	2,3,2,-1,2
ENSG00000230068.2_4	chr1	22385690	22390692	+	692	20	9	17	11	29	20	20	0	38	46	22	29	RP1-224A6.6	ENSG00000230068.2_4	1	ENST00000431803.2_1	2	690	4312	489	4312	0	-1
ENSG00000271428.1_4	chr1	22394833	22395320	-	488	0	0	0	0	0	0	0	0	0	0	0	0	RP1-224A6.8	ENSG00000271428.1_4	1	ENST00000604049.1_1	1	487	0	487	0	0	3
ENSG00000271840.1_4	chr1	22427106	22427853	+	748	46	45	42	24	47	28	30	0	2	75	50	54	RP1-224A6.9	ENSG00000271840.1_4	1	ENST00000606754.1_1	1	747	0	747	0	0	-1
ENSG00000162552.14_2	chr1	22443798	22470462	-	4527	0	0	0	0	0	0	0	0	1	0	0	0	WNT4	ENSG00000162552.14_2	3	ENST00000290167.10_1,ENST00000415567.1_1,ENST00000441048.1_1	5,2,3	3840,678,479	21821,2135,16016	3212,443,237	12995,2135,13881	0,231,0	5,2,5
ENSG00000266564.1	chr1	22592732	22592793	+	62	0	0	0	0	0	0	0	0	0	0	0	0	MIR4418	ENSG00000266564.1	1	ENST00000581169.1	1	61	0	61	0	0	-1
ENSG00000234397.3_4	chr1	22649333	22649824	-	492	1	1	1	1	0	0	0	0	0	0	0	1	RP11-415K20.1	ENSG00000234397.3_4	1	ENST00000487348.1_1	1	491	0	491	0	0	3
ENSG00000279625.1_4	chr1	22691123	22692975	-	1853	0	0	0	0	0	0	0	0	0	0	0	0	RP11-415K20.2	ENSG00000279625.1_4	1	ENST00000624125.1_1	1	1852	0	1852	0	0	3
ENSG00000184677.16_3	chr1	22778344	22857650	+	8992	1926	2013	2694	1863	1952	1781	2263	6	16	1958	2091	2121	ZBTB40	ENSG00000184677.16_3	4	ENST00000404138.5_2,ENST00000374651.8_2,ENST00000400239.6_1,ENST00000375647.4_2	19,16,7,18	8973,8352,1848,8667	70333,70954,52526,70620	4955,4955,765,4952	36934,37876,36934,37876	3703,3369,0,3703	3,2,3,2
ENSG00000237200.1_4	chr1	22843967	22846201	+	273	23	15	29	17	24	22	27	0	0	16	14	17	RP1-61A9.4	ENSG00000237200.1_4	1	ENST00000438551.1_1	2	271	1963	169	1963	0	-1
ENSG00000070886.11_3	chr1	22890057	22930087	+	5358	0	0	0	0	0	1	0	0	0	0	0	0	EPHA8	ENSG00000070886.11_3	2	ENST00000374644.8_1,ENST00000166244.7_1	5,17	1797,4926	24260,35104	750,1967	9600,9600	1483,3001	1,1
ENSG00000173372.16_3	chr1	22962999	22966101	+	1272	0	0	0	0	0	0	0	0	0	0	0	0	C1QA	ENSG00000173372.16_3	3	ENST00000374642.7_1,ENST00000438241.1_2,ENST00000402322.1_1	3,3,2	1140,765,974	1962,1804,1054	775,498,775	1054,1054,1054	736,0,736	2,2,1
ENSG00000159189.11_2	chr1	22970123	22974603	+	1335	0	0	0	0	0	0	0	0	0	0	0	0	C1QC	ENSG00000159189.11_2	3	ENST00000374640.8_1,ENST00000374639.7_1,ENST00000374637.1_1	3,3,3	1160,1180,1086	3320,3297,3148	883,883,660	3023,3023,3023	736,736,736	2,2,2
ENSG00000173369.15_3	chr1	22979255	22988031	+	1601	0	0	0	0	0	0	0	0	0	0	0	0	C1QB	ENSG00000173369.15_3	4	ENST00000510260.5_1,ENST00000509305.5_3,ENST00000432749.6_1,ENST00000314933.6_3	3,3,4,3	674,1251,973,1041	7654,7306,7154,7306	278,726,504,724	6485,6137,5280,6137	0,754,0,760	2,2,3,2
ENSG00000133216.16_4	chr1	23037332	23247993	+	12516	0	1	1	0	1	0	2	0	1	0	2	3	EPHB2	ENSG00000133216.16_4	7	ENST00000544305.5_1,ENST00000374630.7_2,ENST00000400191.7_3,ENST00000374632.7_1,ENST00000374627.1_4,ENST00000465676.1_1,ENST00000490436.1_1	7,16,17,16,15,7,2	1702,3136,10799,3661,3999,999,534	178724,199642,199736,199639,134575,95239,17147	684,684,7842,808,1308,335,481	77961,77961,77961,77961,77961,62746,17147	1442,2945,3151,2948,2826,0,0	1,1,1,1,1,-1,-1
ENSG00000265422.1	chr1	23046010	23046091	+	82	0	0	0	0	0	0	0	0	0	0	0	0	MIR4684	ENSG00000265422.1	1	ENST00000581646.1	1	81	0	81	0	0	-1
ENSG00000216157.2	chr1	23075310	23075404	-	95	0	0	0	0	0	0	0	0	0	0	0	0	AL611946.1	ENSG00000216157.2	1	ENST00000401338.2	1	94	0	94	0	0	3
ENSG00000225952.1_4	chr1	23162206	23163342	-	480	0	0	0	0	0	0	0	0	0	0	0	0	RP11-69E9.1	ENSG00000225952.1_4	1	ENST00000419644.1_1	2	478	658	298	658	0	4
ENSG00000264014.1	chr1	23189652	23189719	-	68	0	0	0	0	0	0	0	0	0	0	0	0	MIR4253	ENSG00000264014.1	1	ENST00000581187.1	1	67	0	67	0	0	3
ENSG00000215906.8_3	chr1	23279536	23291831	-	1641	19	12	25	15	30	22	31	0	2	19	48	35	LACTBL1	ENSG00000215906.8_3	2	ENST00000426928.6_2,ENST00000618559.1_2	6,6	1635,1494	10660,8635	981,975	3259,3259	0,0	6,8
ENSG00000227868.5_4	chr1	23337327	23342343	-	658	2	1	1	3	1	0	3	1	0	0	4	2	C1orf234	ENSG00000227868.5_4	3	ENST00000440767.2_2,ENST00000566855.3_2,ENST00000622840.1_2	2,3,2	507,507,477	2683,4509,2782	366,267,266	2683,2782,2782	69,0,68	2,3,2
ENSG00000004487.16_4	chr1	23345936	23410182	+	5440	4421	5198	7387	6321	4429	4467	4628	13	55	4977	7403	7606	KDM1A	ENSG00000004487.16_4	6	ENST00000465864.2_3,ENST00000356634.7_1,ENST00000400181.8_1,ENST00000481879.1_1,ENST00000494920.1_2,ENST00000602503.1_1	19,19,21,3,6,1	3020,3014,3038,522,899,2809	61209,61227,61157,4471,5221,0	504,510,509,349,211,2809	19753,19753,13793,3241,1779,0	2558,2540,2610,0,0,0	1,1,1,-1,-1,-1
ENSG00000240553.1_5	chr1	23346640	23414551	-	666	90	125	91	72	81	73	79	0	0	99	125	125	RP1-184J9.2	ENSG00000240553.1_5	1	ENST00000427154.1_1	2	664	67247	404	67247	0	4
ENSG00000263793.1	chr1	23370798	23370865	+	68	1	1	8	4	4	4	5	0	0	8	3	3	MIR3115	ENSG00000263793.1	1	ENST00000577915.1	1	67	0	67	0	0	-1
ENSG00000266802.1	chr1	23384351	23384427	-	77	0	0	0	0	0	0	0	0	1	0	0	0	MIR4419A	ENSG00000266802.1	1	ENST00000583845.1	1	76	0	76	0	0	3
ENSG00000169641.13_4	chr1	23410516	23504301	-	9658	1843	2353	1876	1467	1715	1447	1397	2	85	2240	2634	2670	LUZP1	ENSG00000169641.13_4	5	ENST00000418342.5_2,ENST00000302291.8_2,ENST00000314174.5_2,ENST00000471849.5_1,ENST00000475164.2_1	4,5,3,4,4	8417,8893,3712,1186,609	76418,84885,74678,74216,38915	5030,5023,3190,937,225	59639,59639,74386,59116,23815	0,0,0,0,0	4,5,3,6,6
ENSG00000229010.1_4	chr1	23466818	23467635	+	818	0	0	0	0	0	0	0	0	0	0	0	0	RP5-979D14.1	ENSG00000229010.1_4	1	ENST00000450968.1_1	1	817	0	817	0	0	-1
ENSG00000206935.1	chr1	23489197	23489303	+	107	0	0	0	0	0	0	0	0	0	0	0	0	RNU6-514P	ENSG00000206935.1	1	ENST00000384208.1	1	106	0	106	0	0	-1
ENSG00000252578.1	chr1	23490446	23490546	+	101	0	0	0	0	0	0	0	0	0	0	0	0	RNU6-135P	ENSG00000252578.1	1	ENST00000516769.1	1	100	0	100	0	0	-1
ENSG00000179546.4_3	chr1	23518388	23521222	-	2835	13	15	10	9	6	8	13	0	5	37	106	95	HTR1D	ENSG00000179546.4_3	1	ENST00000374619.1_1	1	2834	0	2834	0	-1129	1
ENSG00000215381.3_4	chr1	23571258	23571717	+	460	0	0	0	0	0	0	0	0	0	0	0	0	RP5-1057J7.1	ENSG00000215381.3_4	1	ENST00000442089.1_1	1	459	0	459	0	0	-1
ENSG00000261326.2_3	chr1	23607802	23613245	-	5444	501	373	585	485	521	501	609	2	3	673	587	597	RP5-1057J7.6	ENSG00000261326.2_3	2	ENST00000566551.1_1,ENST00000604481.1_1	1,2	5443,398	0,700	5443,344	0,700	0,0	3,4
ENSG00000284726.1_2	chr1	23624290	23629359	+	604	0	0	0	0	0	0	0	0	0	0	0	0	RP5-1057J7.8	ENSG00000284726.1_2	1	ENST00000641772.1_1	2	602	4467	522	4467	0	-1
ENSG00000125944.19_3	chr1	23630264	23670829	-	8676	7555	9829	11510	10080	6466	5976	7863	16	30	6579	9347	9530	HNRNPR	ENSG00000125944.19_3	13	ENST00000464516.1_1,ENST00000641107.1_1,ENST00000478691.5_1,ENST00000374616.7_1,ENST00000476660.1_1,ENST00000374612.5_1,ENST00000302271.10_1,ENST00000606561.5_1,ENST00000427764.3_1,ENST00000463552.5_1,ENST00000470941.5_1,ENST00000476451.1_1,ENST00000490652.1_1	2,5,10,11,3,11,11,9,9,6,4,6,3	555,641,7636,2680,1634,2683,2618,1828,1779,831,556,808,609	2306,8997,32012,31847,475,31853,31856,32134,28775,24165,19476,18844,5438	335,238,6378,1283,1282,1280,1278,733,612,205,205,205,338	2306,4325,9786,9786,340,9786,9786,14022,14022,14022,11855,9786,3194	0,223,0,0,0,0,0,0,0,0,0,0,0	4,4,10,11,5,11,11,9,9,8,6,8,5
ENSG00000125945.14_2	chr1	23685941	23695935	-	4392	644	810	608	525	581	534	570	0	10	742	908	903	ZNF436	ENSG00000125945.14_2	2	ENST00000314011.8_1,ENST00000374608.3_1	4,3	4067,3785	5927,4626	3773,3246	3821,3821	0,0	4,3
ENSG00000249087.6_4	chr1	23695490	23698332	+	2655	120	87	133	89	65	70	90	1	0	115	100	111	C1orf213	ENSG00000249087.6_4	6	ENST00000458053.4_1,ENST00000454117.1_1,ENST00000335648.3_1,ENST00000518821.1_1,ENST00000437367.3_1,ENST00000518600.1_1	3,2,1,2,3,2	372,995,2546,459,603,374	2414,1626,0,1815,1930,265	270,700,2546,373,270,309	2110,1626,0,1815,1626,265	0,0,0,0,0,0	-1,-1,-1,-1,-1,-1
ENSG00000201405.1	chr1	23696747	23696839	+	93	12	8	11	7	12	7	4	0	0	7	5	6	Y_RNA	ENSG00000201405.1	1	ENST00000364535.1	1	92	0	92	0	0	-1
ENSG00000271420.1_4	chr1	23704873	23705522	-	650	8	8	23	19	5	5	21	0	11	18	16	27	RP5-1057J7.7	ENSG00000271420.1_4	1	ENST00000605350.1_1	1	649	0	649	0	0	3
ENSG00000204219.9_2	chr1	23707554	23751233	-	3515	1199	1526	2502	1997	1208	1136	3250	3	51	2250	3003	3087	TCEA3	ENSG00000204219.9_2	6	ENST00000450454.6_1,ENST00000476978.1_1,ENST00000374601.7_1,ENST00000461794.1_1,ENST00000374602.2_1,ENST00000492271.1_1	11,3,6,5,4,2	1548,852,1191,708,571,439	42131,3134,20035,14609,10105,514	413,635,679,309,166,394	10709,2856,8523,8523,8523,514	0,620,0,0,0,0	11,3,6,5,6,4
ENSG00000232482.2_4	chr1	23737325	23738639	+	426	0	0	0	0	0	0	0	0	0	0	0	0	RP4-654C18.1	ENSG00000232482.2_4	1	ENST00000445848.2_1	3	423	891	296	556	0	-1
ENSG00000088280.18_3	chr1	23755056	23811061	-	4988	1754	1781	1586	1211	1380	1322	1455	4	60	2317	3273	3423	ASAP3	ENSG00000088280.18_3	12	ENST00000495646.5_1,ENST00000336689.7_1,ENST00000618240.4_1,ENST00000465372.5_1,ENST00000492982.6_1,ENST00000437606.6_1,ENST00000484418.1_1,ENST00000475814.5_1,ENST00000530874.1_1,ENST00000478858.5_1,ENST00000608765.1_2,ENST00000449467.2_1	10,25,10,5,25,24,8,8,4,9,6,3	2542,4025,2216,931,2999,2841,899,797,587,879,583,477	5572,51590,53785,3069,51558,51616,2866,4547,1465,41963,32506,23711	1367,1367,1367,398,303,222,305,190,269,156,147,370	1233,27811,27811,1240,27842,27811,1105,2268,1275,27842,27811,23615	0,0,0,326,0,0,531,441,0,0,0,0	10,25,8,5,2,24,3,5,6,11,8,5
ENSG00000007968.6_2	chr1	23832922	23857712	-	5457	239	227	521	334	200	161	480	2	29	299	544	623	E2F2	ENSG00000007968.6_2	2	ENST00000361729.2_1,ENST00000487237.1_1	7,2	5184,548	19606,2489	3718,380	6187,2489	0,0	7,4
ENSG00000235052.1_4	chr1	23875630	23877406	-	456	2	2	5	2	4	1	3	0	0	14	2	6	RP1-150O5.3	ENSG00000235052.1_4	1	ENST00000451217.1_1	2	454	1322	304	1322	0	4
ENSG00000117318.8_2	chr1	23884409	23886285	-	1797	1337	1434	1091	948	547	486	479	3	22	997	946	1153	ID3	ENSG00000117318.8_2	3	ENST00000374561.5_1,ENST00000463312.1_1,ENST00000486541.1_1	3,2,2	1248,621,890	628,520,108	667,481,574	520,520,108	0,0,0	2,4,4
ENSG00000197880.8_4	chr1	23907985	23967058	+	2142	2	1	0	1	0	0	0	0	0	2	2	6	MDS2	ENSG00000197880.8_4	3	ENST00000477916.5_2,ENST00000374555.7_4,ENST00000612756.1_4	7,7,3	1774,1022,417	57299,12212,1023	801,217,160	33924,9552,594	0,0,0	-1,-1,-1
ENSG00000229239.2_4	chr1	23996784	24006749	+	1186	0	0	0	0	0	0	0	0	0	0	0	0	RP11-223J15.2	ENSG00000229239.2_4	1	ENST00000451300.2_1	7	1179	8786	301	5070	0	-1
ENSG00000142676.13_3	chr1	24018232	24023325	+	2659	12001	18593	18799	19762	11840	11890	13712	35	44	9386	15244	14506	RPL11	ENSG00000142676.13_3	6	ENST00000374550.8_3,ENST00000643754.1_1,ENST00000443624.6_2,ENST00000467075.2_2,ENST00000458455.2_3,ENST00000482370.2_2	6,6,5,6,5,4	654,1038,1595,817,874,535	4021,4018,3011,3787,3238,2802	147,491,1248,239,453,150	1048,1048,1048,1048,1048,1048	528,531,0,134,499,0	1,1,-1,1,1,-1
ENSG00000203589.2	chr1	24032291	24033424	-	1134	0	0	0	0	0	0	0	0	0	0	0	0	RP5-886K2.1	ENSG00000203589.2	1	ENST00000366398.2	1	1133	0	1133	0	0	3
ENSG00000244609.2	chr1	24063100	24063380	-	281	1	0	0	0	0	0	0	0	0	0	0	0	RN7SL532P	ENSG00000244609.2	1	ENST00000466184.2	1	280	0	280	0	0	3
ENSG00000011007.12_3	chr1	24069645	24088549	+	5391	2459	2877	2862	2171	2748	2310	2154	7	15	1617	2626	2687	ELOA	ENSG00000011007.12_3	4	ENST00000418390.6_2,ENST00000613537.4_2,ENST00000609199.1_2,ENST00000487554.1_1	11,11,11,4	5143,4913,2660,497	13761,13761,13761,6413	2547,2528,1185,236	5443,5443,5443,4751	2386,2386,2308,0	1,1,1,-1
ENSG00000236810.5_4	chr1	24086872	24104777	-	1347	50	49	81	88	81	65	65	0	12	68	69	80	RP5-886K2.3	ENSG00000236810.5_4	2	ENST00000427796.5_1,ENST00000447961.1_1	4,3	1070,456	16835,330	769,272	10960,228	0,0	6,5
ENSG00000057757.9_3	chr1	24104895	24114722	+	2186	679	743	1066	893	991	957	629	2	39	671	972	969	PITHD1	ENSG00000057757.9_3	3	ENST00000246151.8_1,ENST00000415372.1_3,ENST00000374524.1_1	6,3,4	1597,751,1288	8230,6270,1752	957,584,957	5734,5734,852	630,0,294	1,1,2
ENSG00000011009.10_2	chr1	24117460	24122029	+	2196	2324	2609	2165	1926	2524	2468	2045	6	24	1765	1799	1862	LYPLA2	ENSG00000011009.10_2	10	ENST00000374514.7_1,ENST00000420982.5_1,ENST00000374505.6_1,ENST00000495365.5_1,ENST00000374503.7_1,ENST00000374502.7_1,ENST00000492577.1_1,ENST00000421070.1_1,ENST00000374501.1_1,ENST00000472213.1_1	10,8,7,9,10,8,9,6,6,3	1800,606,900,833,858,1064,708,423,1111,819	2769,2718,2658,2839,2894,2585,2033,1492,513,170	857,103,521,193,273,646,173,208,595,399	1407,1407,1407,1407,1407,1407,640,535,133,88	687,0,408,0,540,536,0,0,489,0	2,2,2,-1,2,2,-1,2,1,-1
ENSG00000117308.14_3	chr1	24122089	24127294	-	3978	953	1078	1477	1275	745	720	1577	1	83	665	908	837	GALE	ENSG00000117308.14_3	16	ENST00000481736.5_1,ENST00000617979.4_1,ENST00000374497.7_1,ENST00000456977.5_2,ENST00000459934.5_1,ENST00000469556.1_1,ENST00000429356.5_1,ENST00000418277.5_2,ENST00000470949.5_1,ENST00000425913.5_3,ENST00000445705.1_2,ENST00000467493.5_1,ENST00000486382.1_1,ENST00000470383.1_1,ENST00000466250.5_1,ENST00000467070.1_1	10,12,12,4,11,3,8,9,5,7,6,4,3,2,4,5	1791,1554,1476,668,1552,879,949,873,542,869,786,983,446,2071,594,551	3391,3651,3326,670,3540,186,2433,3388,1820,2562,1690,757,547,354,1787,1528	613,408,407,403,346,778,176,176,176,215,204,613,226,1386,350,259	1276,1276,951,432,1276,94,636,1276,636,872,548,354,390,354,1276,593	0,0,0,347,0,0,0,0,0,0,0,0,0,0,0,0	12,12,12,4,13,5,10,11,7,9,8,6,5,4,6,7
ENSG00000117305.14_3	chr1	24128375	24165110	-	5658	479	551	522	492	752	798	716	2	23	499	486	508	HMGCL	ENSG00000117305.14_3	9	ENST00000374490.7_1,ENST00000436439.6_1,ENST00000374487.6_1,ENST00000235958.4_3,ENST00000509389.5_1,ENST00000496907.1_1,ENST00000513148.1_1,ENST00000479458.1_1,ENST00000498698.1_1	9,7,10,5,6,5,6,2,2	1591,1347,2141,1096,1373,853,2005,592,461	21983,22194,34592,22396,20466,6768,14124,2337,706	679,677,677,654,937,340,1512,506,404	4763,8352,11881,12187,8460,3391,4763,2337,706	0,0,-229,555,0,0,0,0,0	9,7,1,5,8,7,8,4,4
ENSG00000179163.11_2	chr1	24171567	24194784	-	2047	1617	1618	1317	1290	1129	1034	1063	4	18	1367	1585	1562	FUCA1	ENSG00000179163.11_2	1	ENST00000374479.3_1	8	2039	21178	778	5521	0	8
ENSG00000188822.7_3	chr1	24197016	24239852	-	5254	0	0	0	0	0	0	0	0	1	0	0	0	CNR2	ENSG00000188822.7_3	1	ENST00000374472.4_1	2	5252	37584	5136	37584	-1078	2
ENSG00000264347.1	chr1	24208284	24208575	-	292	0	0	0	0	0	0	0	0	0	0	0	1	RN7SL24P	ENSG00000264347.1	1	ENST00000580371.1	1	291	0	291	0	0	3
ENSG00000238538.1	chr1	24208745	24208842	+	98	0	0	0	0	0	0	0	0	0	0	0	0	snoU13	ENSG00000238538.1	1	ENST00000458849.1	1	97	0	97	0	0	-1
ENSG00000229106.1_3	chr1	24227961	24229227	-	1267	0	0	0	1	0	0	0	0	0	0	0	0	RP11-4M23.2	ENSG00000229106.1_3	1	ENST00000412176.1_1	1	1266	0	1266	0	0	3
ENSG00000232557.3_4	chr1	24233601	24234375	+	210	0	0	0	0	0	0	0	0	0	0	0	0	RP11-4M23.3	ENSG00000232557.3_4	1	ENST00000411815.3_1	2	208	566	138	566	0	-1
ENSG00000264926.1	chr1	24255560	24255637	+	78	0	0	0	0	0	0	0	0	0	0	0	0	MIR378F	ENSG00000264926.1	1	ENST00000578143.1	1	77	0	77	0	0	-1
ENSG00000230228.2_4	chr1	24275506	24275873	-	368	0	0	0	0	0	0	0	0	0	0	0	0	RP11-4M23.4	ENSG00000230228.2_4	1	ENST00000421430.2_1	1	367	0	367	0	0	3
ENSG00000189266.11_3	chr1	24285599	24289952	+	2564	651	964	934	989	687	601	603	4	8	591	871	841	PNRC2	ENSG00000189266.11_3	4	ENST00000471915.5_1,ENST00000334351.7_1,ENST00000374468.1_1,ENST00000579103.1_1	3,3,3,2	377,2413,811,169	1979,1237,1241,306	205,2022,440,166	1673,931,935,306	0,419,419,169	3,3,3,1
ENSG00000188529.14_3	chr1	24291294	24307417	-	10277	1393	1777	1775	1689	1334	1285	1207	4	59	1138	1783	1842	SRSF10	ENSG00000188529.14_3	16	ENST00000344989.10_2,ENST00000453840.7_2,ENST00000341154.10_1,ENST00000484146.6_1,ENST00000473858.5_1,ENST00000374452.9_1,ENST00000374453.7_1,ENST00000343255.9_1,ENST00000492112.2_2,ENST00000485841.5_1,ENST00000338597.9_1,ENST00000495785.1_1,ENST00000473754.1_1,ENST00000497214.1_1,ENST00000485292.1_1,ENST00000469303.1_1	6,6,7,5,4,6,6,6,6,4,5,5,3,2,3,2	3481,1802,2832,1084,774,1188,860,2911,1625,3953,808,1385,497,524,787,411	12046,12049,11650,12099,12256,11813,11816,8333,8330,3320,6154,7547,3186,458,1754,380	2919,1278,1278,550,422,649,338,2356,1075,2678,464,673,257,341,483,293	3850,3850,3850,4127,8179,3636,3636,3636,3636,2962,2962,2962,2962,458,1374,380	0,0,0,0,0,0,0,0,0,0,0,0,0,0,0,0	6,6,9,5,2,6,6,6,6,6,7,2,5,4,5,4
ENSG00000215905.4_4	chr1	24334371	24335009	-	328	0	0	0	0	0	0	0	0	0	0	0	0	RP11-4M23.7	ENSG00000215905.4_4	1	ENST00000442164.2_1	2	326	312	242	312	0	4
ENSG00000225315.2_5	chr1	24367325	24413289	+	454	13	11	9	10	1	4	1	0	1	10	18	16	RP11-293P20.2	ENSG00000225315.2_5	1	ENST00000439239.2_1	4	450	45514	226	22477	0	-1
ENSG00000142661.18_2	chr1	24382525	24438665	-	9254	1596	1770	1074	814	1140	996	930	5	242	1551	1902	1769	MYOM3	ENSG00000142661.18_2	4	ENST00000338909.9_1,ENST00000374434.3_1,ENST00000448831.1_1,ENST00000475306.1_1	10,37,2,14	2683,5767,416,5080	7861,50371,27620,21810	1592,1590,230,3090	2081,6145,27620,6145	0,0,0,0	10,37,4,16
ENSG00000230703.1_5	chr1	24393264	24410055	+	461	0	0	0	0	1	0	0	0	0	0	0	0	RP11-293P20.4	ENSG00000230703.1_5	1	ENST00000429191.1_1	3	458	16333	290	14908	0	-1
ENSG00000142677.3_2	chr1	24446261	24469611	-	2798	254	225	148	91	233	185	186	0	6	319	462	495	IL22RA1	ENSG00000142677.3_2	1	ENST00000270800.1_1	7	2791	20559	1966	5932	0	7
ENSG00000185436.11_2	chr1	24480647	24514449	-	4923	635	672	516	433	455	389	545	2	17	668	1107	1081	IFNLR1	ENSG00000185436.11_2	5	ENST00000327535.5_1,ENST00000327575.6_1,ENST00000374421.7_1,ENST00000374419.1_1,ENST00000374418.3_1	7,6,7,6,4	4542,1470,1469,947,670	28562,28692,28649,28012,25200	3734,792,674,184,306	11130,11130,11130,11130,11130	0,0,0,0,0	7,6,7,6,4
ENSG00000230023.2_4	chr1	24526730	24538183	+	1849	3	1	0	0	0	0	1	0	0	0	0	0	RP11-10N16.2	ENSG00000230023.2_4	1	ENST00000439059.2_1	3	1846	9607	1560	7534	0	-1
ENSG00000221032.3	chr1	24554407	24554520	+	114	0	0	0	0	0	0	0	0	0	0	0	0	AL590683.1	ENSG00000221032.3	1	ENST00000408105.3	1	113	0	113	0	0	-1
ENSG00000266511.1	chr1	24606257	24606345	-	89	0	0	0	0	0	0	0	0	0	0	0	0	AL590683.2	ENSG00000266511.1	1	ENST00000584309.1	1	88	0	88	0	0	3
ENSG00000232298.2_4	chr1	24634046	24648391	-	856	0	0	0	0	0	0	0	0	0	0	0	0	RP11-10N16.3	ENSG00000232298.2_4	1	ENST00000437965.1_1	5	851	13494	235	9674	0	7
ENSG00000158055.15_2	chr1	24645812	24690972	+	3940	0	1	3	1	3	0	1	0	0	17	8	6	GRHL3	ENSG00000158055.15_2	9	ENST00000361548.8_1,ENST00000350501.9_1,ENST00000530984.1_1,ENST00000356046.6_1,ENST00000524724.5_1,ENST00000528064.5_1,ENST00000236255.4_1,ENST00000528181.1_1,ENST00000461318.1_1	16,16,3,16,4,15,16,3,3	2853,2103,558,2788,490,1668,1854,482,574	33143,42954,16728,32964,16294,29780,29594,4215,541	944,345,260,944,186,345,345,291,383	11858,14063,11858,11679,11485,11528,8309,4012,421	1793,1865,0,1656,0,156,1808,0,0	1,1,-1,2,2,1,1,-1,-1
ENSG00000001460.17_3	chr1	24683489	24743424	-	8511	99	156	125	123	160	139	96	0	17	140	154	180	STPG1	ENSG00000001460.17_3	12	ENST00000374409.5_1,ENST00000337248.8_1,ENST00000003583.12_1,ENST00000468303.5_1,ENST00000497384.1_1,ENST00000438866.1_2,ENST00000435187.1_2,ENST00000483261.1_1,ENST00000498488.5_1,ENST00000483528.1_1,ENST00000475760.1_1,ENST00000492753.1_1	9,9,8,10,6,4,3,2,3,4,2,2	2795,2706,2536,6006,1679,807,769,623,708,754,453,305	55303,54066,54184,53923,30948,9973,11637,245,24187,19711,9247,1379	1620,1619,1614,3260,1135,364,550,476,421,386,377,187	13455,12218,17316,12218,9640,5843,7558,245,14547,9640,9247,1379	0,0,0,0,0,306,340,0,0,0,0,0	9,9,8,12,8,4,3,4,5,6,4,4
ENSG00000001461.16_2	chr1	24742284	24799466	+	9404	300	303	272	198	446	391	288	4	52	258	249	253	NIPAL3	ENSG00000001461.16_2	7	ENST00000374399.8_1,ENST00000003912.7_2,ENST00000488155.1_1,ENST00000358028.8_2,ENST00000339255.2_2,ENST00000475663.2_1,ENST00000432012.1_1	12,13,2,8,12,3,5	1699,5468,929,1749,1664,691,2709	51814,51705,3387,37262,48832,5561,7503	349,3990,837,770,349,349,2352	20532,13464,3387,20532,20532,3387,3482	1210,966,0,674,1096,0,398	2,5,-1,2,2,-1,-1
ENSG00000117602.11_2	chr1	24828841	24867530	+	7077	1168	1224	870	629	721	731	1218	4	25	602	823	790	RCAN3	ENSG00000117602.11_2	11	ENST00000618490.4_1,ENST00000538532.5_1,ENST00000436717.6_1,ENST00000616511.4_1,ENST00000374395.8_1,ENST00000425530.3_1,ENST00000610732.4_1,ENST00000412742.5_1,ENST00000630217.1_1,ENST00000374393.4_1,ENST00000482807.1_1	4,5,4,4,5,5,5,3,3,2,3	2382,2635,2570,2523,6797,992,2657,664,655,380,494	32286,32033,31552,31599,31346,26798,26768,20353,20355,20526,2253	1926,1926,1926,1926,5947,264,1926,247,264,194,276	28755,16651,18516,28068,16651,16651,16651,16651,18516,20526,1839	349,722,549,349,722,692,722,519,549,346,324	3,2,2,3,2,2,2,1,1,1,-1
ENSG00000266551.1	chr1	24855945	24856204	-	260	0	0	0	0	0	0	0	0	3	0	0	0	RN7SL857P	ENSG00000266551.1	1	ENST00000580228.1	1	259	0	259	0	0	3
ENSG00000264443.1_4	chr1	24865292	24882515	-	1445	6	15	3	14	8	5	21	0	2	10	6	4	RP4-594I10.3	ENSG00000264443.1_4	1	ENST00000577528.1_1	3	1442	15781	1074	12013	0	5
ENSG00000184454.6_3	chr1	24882602	24935819	+	4122	123	137	103	93	66	85	135	0	26	67	91	71	NCMAP	ENSG00000184454.6_3	2	ENST00000374392.2_1,ENST00000486262.1_1	4,4	3949,4059	49265,15805	3719,3722	39255,5800	306,0	2,-1
ENSG00000227312.2_4	chr1	24890118	24890465	+	348	5	3	3	3	5	1	5	0	0	3	2	2	RP11-496D1.2	ENSG00000227312.2_4	1	ENST00000443086.2_1	1	347	0	347	0	0	-1
ENSG00000239106.1	chr1	24951902	24952004	-	103	0	0	0	0	0	0	0	0	0	0	0	1	Y_RNA	ENSG00000239106.1	1	ENST00000459380.1	1	102	0	102	0	0	3
ENSG00000133226.16_5	chr1	24958207	24999758	+	8168	1871	1885	2954	1743	2015	1451	2675	9	30	2351	2801	2751	SRRM1	ENSG00000133226.16_5	23	ENST00000471693.1_1,ENST00000478890.5_1,ENST00000593639.5_4,ENST00000323848.13_2,ENST00000466910.5_1,ENST00000468822.5_1,ENST00000600523.5_1,ENST00000462710.5_1,ENST00000374389.8_2,ENST00000490543.5_1,ENST00000479034.5_1,ENST00000447431.6_2,ENST00000596378.1_4,ENST00000494934.5_1,ENST00000495561.1_1,ENST00000485441.5_1,ENST00000470243.5_1,ENST00000496882.5_1,ENST00000461768.5_1,ENST00000485541.1_…	3,5,5,17,4,7,6,4,18,6,17,19,15,4,3,4,5,6,6,4,2,2,2	374,475,558,3994,795,761,569,2620,3092,667,2654,3672,2299,798,560,557,716,828,490,675,331,511,815	3787,16491,8198,26261,3521,8478,5030,4173,26235,6114,25633,26268,23650,3177,2355,2083,2893,9479,11344,7371,5590,2198,1071	233,170,170,1085,509,170,142,2362,464,170,464,1080,385,495,411,203,274,268,144,408,256,370,732	2545,12885,4592,5590,2637,2637,2637,2637,5590,2637,5590,5590,5596,1413,1413,822,1274,5596,5596,5596,5590,2198,1071	0,0,0,2698,0,0,236,0,2724,0,0,2445,0,0,0,0,0,0,0,0,0,0,0	-1,-1,3,1,-1,-1,1,-1,1,-1,-1,1,3,-1,-1,-1,-1,-1,-1,-1,-1,-1,-1
ENSG00000238986.1	chr1	24993474	24993578	-	105	0	0	0	0	0	0	0	0	0	0	0	0	snoU13	ENSG00000238986.1	1	ENST00000459464.1	1	104	0	104	0	0	3
ENSG00000284699.1_2	chr1	25031385	25044087	+	886	0	0	0	0	0	0	0	0	0	0	0	0	RP11-373M8.2	ENSG00000284699.1_2	1	ENST00000641176.1_1	4	882	11820	361	8801	0	-1
ENSG00000169504.14_2	chr1	25071848	25170815	+	4495	5168	6811	6684	6108	4265	4048	6053	11	23	4692	6941	6713	CLIC4	ENSG00000169504.14_2	4	ENST00000374379.8_1,ENST00000497755.1_1,ENST00000488683.1_1,ENST00000489758.1_1	6,6,7,2	4340,666,2716,437	94627,93859,96169,52117	3551,243,1814,221	52117,47552,52117,52117	756,0,756,0	1,-1,1,-1
ENSG00000238482.1	chr1	25104364	25104470	-	107	0	0	0	0	0	0	0	0	0	0	0	0	RNU6-1208P	ENSG00000238482.1	1	ENST00000459588.1	1	106	0	106	0	0	3
ENSG00000020633.18_2	chr1	25226002	25291612	-	4523	1	2	2	3	4	1	3	0	0	11	7	13	RUNX3	ENSG00000020633.18_2	5	ENST00000399916.5_1,ENST00000308873.10_1,ENST00000338888.3_1,ENST00000496967.1_1,ENST00000479341.1_1	6,5,7,5,3	4334,3856,2622,567,281	61165,26503,61333,25659,35103	3155,3148,1637,158,115	34662,11823,34662,11823,34662	0,0,0,0,0	6,5,7,7,5
ENSG00000229162.1_4	chr1	25287836	25289588	+	820	0	0	0	0	0	0	0	0	0	0	0	0	RP11-84D1.1	ENSG00000229162.1_4	1	ENST00000456316.1_1	3	817	935	501	734	0	-1
ENSG00000261025.1_4	chr1	25294914	25297356	-	2443	0	0	0	0	0	0	0	0	0	0	1	0	RP11-84D1.2	ENSG00000261025.1_4	1	ENST00000568143.1_1	1	2442	0	2442	0	0	3
ENSG00000264371.1	chr1	25349994	25350077	+	84	0	0	0	0	0	0	0	0	0	0	1	0	MIR4425	ENSG00000264371.1	1	ENST00000580572.1	1	83	0	83	0	0	-1
ENSG00000233755.1_4	chr1	25370198	25439611	-	863	0	0	0	0	0	0	0	0	0	0	0	0	RP4-799D16.1	ENSG00000233755.1_4	2	ENST00000424084.1_1,ENST00000429666.1_1	3,2	487,612	68925,2050	240,371	60017,2050	0,0	5,4
ENSG00000233419.3_4	chr1	25451544	25451945	-	402	0	1	0	0	0	0	0	0	0	0	0	0	RP4-781L3.1	ENSG00000233419.3_4	1	ENST00000413189.1_1	1	401	0	401	0	0	3
ENSG00000231953.2_4	chr1	25534630	25535928	+	988	0	0	0	0	0	1	0	0	1	0	0	0	RP4-706G24.1	ENSG00000231953.2_4	1	ENST00000455902.2_1	2	986	312	903	312	0	-1
ENSG00000117614.9_3	chr1	25549170	25558993	-	3370	620	773	692	673	557	632	647	2	7	720	916	963	SYF2	ENSG00000117614.9_3	4	ENST00000236273.8_2,ENST00000354361.3_2,ENST00000474160.1_1,ENST00000476231.1_1	7,6,2,2	1338,920,436,1960	8476,8601,2981,233	752,466,328,1902	2981,3869,2981,233	0,0,0,0	7,6,4,4
ENSG00000284602.1_2	chr1	25559077	25561266	+	2190	102	103	91	68	71	57	77	0	162	78	89	89	RP3-465N24.7	ENSG00000284602.1_2	1	ENST00000641729.1_1	1	2189	0	2189	0	0	-1
ENSG00000284657.1_2	chr1	25565985	25566744	+	760	11	13	12	17	13	14	10	0	0	23	20	18	RP3-465N24.8	ENSG00000284657.1_2	1	ENST00000641059.1_1	1	759	0	759	0	0	-1
ENSG00000117616.17_4	chr1	25568728	25664704	-	6804	1444	1405	1221	1116	1104	1126	1017	1	62	1070	1255	1170	RSRP1	ENSG00000117616.17_4	22	ENST00000243189.11_1,ENST00000569495.5_1,ENST00000498238.1_1,ENST00000566395.5_1,ENST00000565733.5_1,ENST00000568254.5_1,ENST00000473314.6_1,ENST00000570063.5_1,ENST00000564223.5_1,ENST00000475766.2_1,ENST00000491378.1_1,ENST00000431849.3_1,ENST00000568212.1_1,ENST00000568701.1_3,ENST00000561867.1_2,ENST00000568996.1_2,ENST00000450820.2_1,ENST00000568399.1_1,ENST00000562018.1_1,ENST00000567741.1_…	5,3,4,5,5,5,6,4,3,6,2,3,3,2,2,2,2,2,3,3,2,2	1497,898,2937,819,767,2008,3028,1817,392,519,485,1951,567,627,475,478,968,627,562,594,943,597	3785,958,2268,3461,3618,3194,92881,2532,971,3134,652,1423,1888,20711,90949,91040,13803,32219,32166,32011,1879,775	585,555,1751,450,196,674,1125,1124,166,166,427,1229,302,452,353,334,823,434,371,361,476,419	1517,845,1143,1143,1517,1143,90011,1143,845,845,652,1143,1143,20711,90949,91040,13803,32219,30091,18769,1879,775	0,0,0,571,223,0,0,0,0,0,0,0,0,0,0,0,0,0,0,0,0,0	5,5,6,3,4,4,4,6,5,8,4,3,5,4,4,4,4,4,5,5,4,4
ENSG00000272432.1_4	chr1	25574328	25574812	+	485	5	7	10	5	7	9	5	0	0	2	8	2	RP3-465N24.6	ENSG00000272432.1_4	1	ENST00000607698.1_1	1	484	0	484	0	0	-1
ENSG00000261349.1_4	chr1	25592593	25593627	-	459	16	13	7	14	12	9	16	0	3	15	12	20	RP3-465N24.5	ENSG00000261349.1_4	1	ENST00000566714.1_1	2	457	577	425	577	0	4
ENSG00000187010.19_5	chr1	25598884	25656936	+	3313	0	0	0	0	0	0	0	0	0	0	0	0	RHD	ENSG00000187010.19_5	10	ENST00000564398.5_1,ENST00000328664.8_3,ENST00000622561.4_1,ENST00000454452.6_1,ENST00000423253.1_1,ENST00000417538.6_3,ENST00000357542.8_1,ENST00000568195.5_3,ENST00000342055.9_1,ENST00000423810.6_1	7,10,11,7,7,8,8,9,9,10	1434,2920,2996,1296,944,1325,1379,1458,1548,1627	33115,55132,54963,55417,48408,55338,55284,55205,55115,55036	346,1547,1547,313,186,313,313,313,313,313	11878,11878,11878,25439,18430,13541,22169,11878,21082,11878	0,1244,1287,959,0,1129,1183,1383,1473,1287	-1,1,1,1,-1,1,1,1,1,1
ENSG00000224183.1_3	chr1	25620655	25621134	-	480	2	0	3	1	0	2	2	0	0	1	1	0	RP11-335G20.1	ENSG00000224183.1_3	1	ENST00000414693.1_1	1	479	0	479	0	0	3
ENSG00000259984.1_4	chr1	25662920	25663956	-	459	30	19	15	21	24	16	12	0	3	48	33	32	RP11-335G20.7	ENSG00000259984.1_4	1	ENST00000570165.1_1	2	457	579	425	579	0	4
ENSG00000183726.10_2	chr1	25664408	25688852	+	3410	1674	1894	1596	1292	1524	1330	1069	5	11	1119	1620	1751	TMEM50A	ENSG00000183726.10_2	6	ENST00000374358.4_1,ENST00000498135.5_1,ENST00000491936.5_1,ENST00000480937.5_1,ENST00000468704.1_1,ENST00000487234.1_1	7,6,5,6,6,2	2676,770,960,1096,793,509	21768,21880,21985,21860,17600,8553	1701,307,605,619,357,481	8553,11047,13170,8553,8553,8553	468,0,0,0,0,0	2,-1,-1,-1,-1,-1
ENSG00000252515.1	chr1	25667462	25667525	+	64	2	3	3	2	4	2	0	0	0	3	3	4	RNU6-1171P	ENSG00000252515.1	1	ENST00000516706.1	1	63	0	63	0	0	-1
ENSG00000238889.1	chr1	25672765	25672868	-	104	0	0	0	0	0	0	0	0	0	0	0	0	snoU13	ENSG00000238889.1	1	ENST00000459565.1	1	103	0	103	0	0	3
ENSG00000188672.18_4	chr1	25688740	25756683	-	2433	6	5	2	7	12	9	6	0	0	5	8	4	RHCE	ENSG00000188672.18_4	10	ENST00000294413.12_2,ENST00000340849.8_1,ENST00000349320.7_1,ENST00000527747.5_1,ENST00000346452.8_1,ENST00000349438.8_1,ENST00000413854.5_3,ENST00000527187.5_1,ENST00000533771.1_1,ENST00000495048.1_1	10,7,12,4,7,9,9,7,4,4	1650,1080,1798,452,964,1226,1189,1434,577,588	57015,57407,66082,39891,57465,57148,57094,34009,34508,17664	304,245,252,194,190,186,186,346,157,209	11770,15171,17475,27168,16752,13548,15171,11770,17893,10886	0,0,0,224,0,0,0,0,0,0	10,6,12,3,7,8,8,9,2,6
ENSG00000238084.4_4	chr1	25725212	25725689	+	478	0	1	5	3	2	3	3	0	0	3	2	1	RP3-469D22.1	ENSG00000238084.4_4	1	ENST00000419297.2_1	1	477	0	477	0	0	-1
ENSG00000266468.1	chr1	25732722	25732780	+	59	0	0	0	0	0	0	0	0	0	0	0	0	AL031284.1	ENSG00000266468.1	1	ENST00000577655.1	1	58	0	58	0	0	-1
ENSG00000204178.9_2	chr1	25757349	25826700	+	3979	1524	1664	1426	1389	1455	1500	924	2	12	1536	1980	1894	TMEM57	ENSG00000204178.9_2	3	ENST00000399766.7_1,ENST00000374343.4_1,ENST00000470035.1_1	9,11,3	3285,3906,556	66062,65383,9334	1941,1945,392	29734,25224,5325	1305,1984,0	1,1,-1
ENSG00000157978.11_2	chr1	25870071	25895377	+	5397	264	267	346	243	322	261	294	1	22	301	475	532	LDLRAP1	ENSG00000157978.11_2	7	ENST00000374338.4_1,ENST00000485476.2_1,ENST00000488127.1_1,ENST00000462394.1_1,ENST00000484476.5_1,ENST00000474283.1_1,ENST00000470950.1_1	9,3,7,2,4,3,3	2931,235,4663,367,653,910,992	22375,4683,10857,2181,3531,3026,2053	2038,142,2036,276,337,722,788	10136,3887,5377,2181,1641,1641,1641	918,0,0,0,0,0,0	1,-1,-1,-1,-1,-1,-1
ENSG00000225643.1_4	chr1	25907969	25916847	+	483	1	2	0	0	1	0	0	0	0	0	0	0	RP11-70P17.1	ENSG00000225643.1_4	1	ENST00000412797.1_1	2	481	8397	294	8397	0	-1
ENSG00000117643.14_3	chr1	25943959	26112698	+	9026	7	10	8	8	4	2	6	0	0	11	8	9	MAN1C1	ENSG00000117643.14_3	8	ENST00000611903.4_1,ENST00000374332.8_2,ENST00000263979.7_2,ENST00000473891.1_1,ENST00000374329.1_1,ENST00000496532.5_1,ENST00000475314.5_1,ENST00000487493.1_1	14,12,13,5,11,4,5,3	4633,4629,2614,3415,2450,765,888,1142	164105,164110,163986,71767,72398,9866,5499,2436	2543,2544,787,3092,787,334,313,629	68103,68103,60132,60132,36523,4261,2616,1473	1077,1881,1342,0,1196,0,0,0	2,1,3,-1,2,-1,-1,-1
ENSG00000233478.1_4	chr1	25971035	25985602	-	2224	0	0	0	0	0	0	0	0	0	0	0	0	RP1-187B23.1	ENSG00000233478.1_4	1	ENST00000436991.1_1	2	2222	12345	1876	12345	0	4
ENSG00000162430.16_4	chr1	26126667	26144715	+	4424	386	303	515	274	283	196	490	4	32	689	363	358	SEPN1	ENSG00000162430.16_4	5	ENST00000354177.8_1,ENST00000361547.6_1,ENST00000374315.1_1,ENST00000630065.2_1,ENST00000494537.1_1	13,13,12,4,5	4214,4321,4200,2990,807	13829,13727,13828,2543,2455	2671,2676,2673,2671,442	3982,3305,3982,1370,1370	1658,1760,1659,199,0	1,1,1,3,-1
ENSG00000255054.3_5	chr1	26137961	26150235	+	792	285	310	365	241	276	239	366	2	3	305	269	272	RP1-317E23.6	ENSG00000255054.3_5	2	ENST00000559265.1_1,ENST00000527604.1_1	3,4	565,330	11273,9441	312,109	11117,8841	0,129	-1,-1
ENSG00000228172.5_4	chr1	26143240	26147288	-	2793	35	28	31	20	24	13	39	0	0	14	12	17	RP1-317E23.3	ENSG00000228172.5_4	3	ENST00000442055.5_1,ENST00000453649.1_1,ENST00000536896.2_1	4,4,1	431,513,2306	2592,2480,0	151,201,2306	1220,1288,0	0,0,0	6,6,3
ENSG00000117640.17_3	chr1	26145131	26159433	+	5817	864	1069	1030	846	941	861	1200	2	30	658	885	856	MTFR1L	ENSG00000117640.17_3	23	ENST00000424294.5_3,ENST00000374303.6_1,ENST00000533762.5_3,ENST00000529116.5_2,ENST00000474295.5_1,ENST00000488327.6_3,ENST00000472643.5_3,ENST00000494293.1_1,ENST00000469815.5_1,ENST00000526894.5_1,ENST00000478284.5_1,ENST00000524618.5_1,ENST00000374307.9_1,ENST00000528624.5_1,ENST00000525713.5_3,ENST00000374301.7_1,ENST00000464008.6_1,ENST00000526158.5_3,ENST00000530599.5_1,ENST00000374300.7_1…	6,7,6,5,7,4,5,2,4,6,7,7,7,5,5,7,7,6,6,7,6,4,3	750,1997,716,550,1866,537,833,802,889,727,786,1210,1861,557,570,2092,1194,809,757,2046,3256,633,2528	10124,11038,6065,6241,11147,6350,9056,2990,11467,9125,8854,11015,11074,5655,5944,10653,8232,8317,5287,10064,8157,6168,4774	212,1020,199,132,1021,211,320,728,413,211,211,321,1017,161,156,1017,427,216,191,1017,1605,288,1194	4167,2990,2990,2967,2990,3592,3615,2990,5761,2990,2990,2990,2990,2670,2670,2683,2683,2683,2554,2683,2792,3098,2683	0,873,0,0,613,0,0,0,0,544,219,585,837,156,0,873,156,0,156,873,613,0,0	2,2,6,2,2,4,4,-1,-1,2,2,5,2,2,2,2,2,2,2,2,1,-1,-1
ENSG00000272478.1_4	chr1	26158404	26158625	-	222	6	11	13	17	3	7	8	0	0	11	9	16	RP1-317E23.7	ENSG00000272478.1_4	1	ENST00000606617.1_1	1	221	0	221	0	0	3
ENSG00000127423.10_3	chr1	26158404	26185949	-	2408	274	350	606	551	279	234	264	0	66	399	770	771	AUNIP	ENSG00000127423.10_3	3	ENST00000538789.5_2,ENST00000481602.1_1,ENST00000374298.3_2	4,2,3	1388,459,2113	26157,3082,23293	824,325,1840	21726,3082,21726	0,0,0	4,4,3
ENSG00000236528.1_4	chr1	26186104	26189911	+	849	20	22	11	12	17	15	4	0	1	8	18	20	RP1-125I3.2	ENSG00000236528.1_4	1	ENST00000455431.1_1	2	847	2960	585	2960	0	-1
ENSG00000182749.5_3	chr1	26187701	26197744	-	3297	602	616	945	696	556	506	419	3	50	679	1235	1154	PAQR7	ENSG00000182749.5_3	1	ENST00000374296.3_1	2	3295	6748	2651	6748	-1036	2
ENSG00000207302.1	chr1	26203987	26204096	+	110	0	0	0	0	0	0	0	0	0	0	0	0	Y_RNA	ENSG00000207302.1	1	ENST00000384572.1	1	109	0	109	0	0	-1
ENSG00000117632.22_3	chr1	26210672	26233482	-	6261	3640	4846	6041	4336	3075	2257	4641	9	38	2437	5088	5130	STMN1	ENSG00000117632.22_3	9	ENST00000513116.1_1,ENST00000426559.6_1,ENST00000455785.6_1,ENST00000399728.5_1,ENST00000465604.1_1,ENST00000357865.6_1,ENST00000374291.5_1,ENST00000485226.1_1,ENST00000446334.1_3	2,5,5,5,4,5,5,2,4	1781,943,1499,1707,2943,1132,862,447,661	6645,20083,4865,4328,2906,5264,3525,1959,3216	1688,429,985,969,2322,492,346,275,345	6645,15622,1959,1959,1651,2050,1959,1959,1959	0,0,0,0,0,0,0,0,0	4,5,5,5,6,5,5,4,6
ENSG00000229786.1_3	chr1	26213851	26214101	+	251	0	0	0	0	0	0	0	0	0	0	0	0	RP1-125I3.7	ENSG00000229786.1_3	1	ENST00000440710.1_1	1	250	0	250	0	0	-1
ENSG00000223624.1_4	chr1	26215461	26215600	+	140	0	0	0	0	0	0	0	0	0	0	0	0	RP1-125I3.4	ENSG00000223624.1_4	1	ENST00000453780.1_1	1	139	0	139	0	0	-1
ENSG00000264021.1	chr1	26232853	26232945	-	93	125	133	191	138	98	60	151	0	1	63	132	140	MIR3917	ENSG00000264021.1	1	ENST00000580971.1	1	92	0	92	0	0	3
ENSG00000266763.1	chr1	26238240	26238313	+	74	0	0	0	0	0	0	0	0	0	0	0	0	AL033528.1	ENSG00000266763.1	1	ENST00000584862.1	1	73	0	73	0	0	-1
ENSG00000158006.13_2	chr1	26286258	26324648	-	3835	516	610	543	506	611	588	401	1	57	343	602	575	PAFAH2	ENSG00000158006.13_2	7	ENST00000374282.7_1,ENST00000374284.5_1,ENST00000493892.5_1,ENST00000464540.1_1,ENST00000476611.1_1,ENST00000439092.6_1,ENST00000441420.1_1	11,11,5,4,2,6,7	3570,2512,489,413,236,772,741	34820,34762,15203,15339,1469,12893,13312	2316,1313,141,141,163,173,173	10475,10475,7162,13497,1469,6585,6585	0,0,0,0,0,0,0	11,11,7,6,4,8,9
ENSG00000207237.1	chr1	26290688	26290791	+	104	0	0	0	0	0	0	0	0	0	0	0	0	RNU6-110P	ENSG00000207237.1	1	ENST00000384508.1	1	103	0	103	0	0	-1
ENSG00000252190.1	chr1	26332497	26332621	+	125	0	0	0	0	0	0	0	0	0	0	0	0	SCARNA17	ENSG00000252190.1	1	ENST00000516381.1	1	124	0	124	0	0	-1
ENSG00000252691.1	chr1	26332707	26332790	+	84	0	0	0	0	0	0	0	0	0	0	0	0	SCARNA18	ENSG00000252691.1	1	ENST00000516882.1	1	83	0	83	0	0	-1
ENSG00000158008.9_2	chr1	26346375	26362955	+	4537	20	16	29	23	5	8	15	0	1	13	16	23	EXTL1	ENSG00000158008.9_2	4	ENST00000481377.5_1,ENST00000374280.3_1,ENST00000484339.1_1,ENST00000470037.1_1	6,11,4,3	598,4004,871,683	11065,10680,7495,2191	132,1645,423,355	9249,5768,5768,1211	0,2020,0,0	-1,1,-1,-1
ENSG00000158014.14_2	chr1	26363743	26372624	-	3498	0	1	2	0	1	1	1	0	2	0	2	1	SLC30A2	ENSG00000158014.14_2	3	ENST00000374278.7_1,ENST00000374276.3_1,ENST00000498060.1_1	7,8,3	3090,2486,712	5771,5625,1300	2053,1283,454	1789,1789,747	0,0,0	7,8,5
ENSG00000284309.1_3	chr1	26373156	26375590	+	941	0	0	0	0	0	0	0	0	0	0	0	0	RP11-96L14.9	ENSG00000284309.1_3	1	ENST00000640097.1_1	2	939	1495	484	1495	0	-1
ENSG00000158022.6_2	chr1	26377795	26394927	-	2573	0	0	1	0	0	0	0	0	0	2	0	2	TRIM63	ENSG00000158022.6_2	2	ENST00000374272.3_1,ENST00000483052.1_1	9,3	1761,1362	14568,5830	579,1100	4934,4934	0,0	9,5
ENSG00000265320.1	chr1	26398069	26398168	+	100	0	0	0	0	0	0	0	0	0	0	0	0	AL391650.1	ENSG00000265320.1	1	ENST00000581535.1	1	99	0	99	0	0	-1
ENSG00000175087.9_3	chr1	26437656	26452034	+	4535	248	342	297	277	374	372	315	1	4	233	374	393	PDIK1L	ENSG00000175087.9_3	4	ENST00000619836.4_1,ENST00000444713.5_2,ENST00000374271.8_1,ENST00000374269.1_1	3,3,4,3	4249,835,4275,2563	10116,10116,9431,9621	3693,301,3706,2196	7244,7244,7244,7244	1024,0,1024,1024	2,2,3,2
ENSG00000197245.5_2	chr1	26485511	26490453	+	2858	0	0	0	0	0	0	0	0	0	0	0	0	FAM110D	ENSG00000197245.5_2	1	ENST00000374268.4_1	2	2856	2086	2750	2086	815	2
ENSG00000282872.1_4	chr1	26490652	26495072	-	761	0	0	0	0	0	0	0	0	0	0	0	0	RP11-96L14.8	ENSG00000282872.1_4	2	ENST00000634842.1_3,ENST00000635463.1_3	4,3	639,463	3781,2410	294,215	2298,2298	0,0	4,3
ENSG00000236782.6_4	chr1	26496007	26498312	-	1721	0	1	0	0	0	0	0	0	0	0	1	0	RP11-96L14.7	ENSG00000236782.6_4	5	ENST00000448923.2_1,ENST00000407889.6_1,ENST00000414762.1_1,ENST00000444682.1_1,ENST00000433939.6_1	3,4,2,2,4	1465,690,445,621,575	840,1028,188,558,921	1082,403,275,404,273	558,558,188,558,558	0,0,0,0,0	2,2,4,4,3
ENSG00000142684.8_3	chr1	26496362	26497364	+	769	228	342	485	428	433	369	299	0	9	327	433	427	ZNF593	ENSG00000142684.8_3	2	ENST00000374266.6_2,ENST00000270812.6_2	3,2	672,696	330,235	312,455	235,235	402,469	1,1
ENSG00000142675.17_2	chr1	26503894	26516377	+	4043	106	96	78	71	101	93	93	1	7	156	118	149	CNKSR1	ENSG00000142675.17_2	14	ENST00000361530.10_1,ENST00000481077.6_1,ENST00000480348.6_1,ENST00000465415.1_1,ENST00000374253.9_1,ENST00000525687.5_1,ENST00000482227.5_1,ENST00000531191.5_1,ENST00000524529.6_1,ENST00000531150.5_1,ENST00000528001.1_1,ENST00000528281.5_1,ENST00000480617.1_1,ENST00000484874.2_1	21,9,7,3,21,13,21,20,4,7,9,11,3,4	2604,856,659,621,2517,1187,2486,2653,558,574,544,831,464,638	9879,5455,5069,2959,9858,6342,9884,7025,1111,1616,1810,4422,922,922	607,181,181,368,605,181,603,567,354,124,104,172,326,269	2854,2873,2854,2854,2854,2854,2854,1982,613,613,620,1982,752,752	2121,189,0,0,2142,929,682,1355,0,0,0,232,0,0	1,1,-1,-1,1,1,1,8,-1,-1,-1,-1,-1,-1
ENSG00000188782.8_4	chr1	26517052	26529459	+	2030	1	0	0	0	0	0	0	0	0	0	0	0	CATSPER4	ENSG00000188782.8_4	3	ENST00000338855.6_2,ENST00000456354.6_2,ENST00000518899.5_1	9,10,10	1507,1902,1821	9535,10505,10519	279,479,479	3798,3798,3798	0,1409,1147	1,1,1
ENSG00000236155.6_4	chr1	26536232	26556331	+	3191	50	53	65	62	43	29	60	0	81	64	81	71	RP11-231P20.2	ENSG00000236155.6_4	4	ENST00000428812.1_1,ENST00000447201.5_1,ENST00000448341.2_1,ENST00000451482.1_1	8,3,4,4	2100,331,666,1074	15999,8719,8343,3446	1169,143,376,383	6374,6374,6374,1701	0,0,0,0	-1,-1,-1,-1
ENSG00000278572.1_4	chr1	26545072	26546967	-	899	0	0	0	0	0	0	0	0	0	0	1	0	RP11-231P20.6	ENSG00000278572.1_4	1	ENST00000622820.1_1	3	896	999	670	844	0	5
ENSG00000130695.14_3	chr1	26560644	26605529	+	5422	1411	1461	1861	1481	1282	1298	1303	2	15	1362	2256	2337	CEP85	ENSG00000130695.14_3	9	ENST00000451429.6_2,ENST00000476272.6_2,ENST00000252992.8_2,ENST00000640292.1_2,ENST00000480446.1_1,ENST00000453146.1_1,ENST00000469609.5_1,ENST00000468163.1_1,ENST00000491670.1_1	13,15,14,13,2,10,7,2,3	4048,3492,3921,2273,433,2811,2377,451,938	40837,41114,40685,35236,339,18323,7140,914,4357	1905,1126,1675,694,254,1671,1674,372,606	15333,10853,10853,10853,339,8681,2893,914,2893	2124,2273,2276,2273,0,1297,0,0,0	2,2,2,1,-1,-1,-1,-1,-1
ENSG00000270733.1_4	chr1	26589532	26589889	-	358	0	0	0	0	0	0	0	0	0	0	0	0	RP11-231P20.5	ENSG00000270733.1_4	1	ENST00000603670.1_1	1	357	0	357	0	0	3
ENSG00000142669.14_3	chr1	26605667	26608013	+	1786	763	644	577	361	987	772	389	2	3	583	683	680	SH3BGRL3	ENSG00000142669.14_3	2	ENST00000270792.9_1,ENST00000319041.6_1	3,2	1658,766	688,562	1027,685	562,562	279,265	1,1
ENSG00000158062.20_4	chr1	26607819	26644854	-	4704	188	177	361	251	186	178	277	1	7	390	357	403	UBXN11	ENSG00000158062.20_4	16	ENST00000314675.11_3,ENST00000472155.5_1,ENST00000374223.5_1,ENST00000475591.5_1,ENST00000357089.8_1,ENST00000494942.5_1,ENST00000374221.7_1,ENST00000374217.6_1,ENST00000374222.5_1,ENST00000496466.1_1,ENST00000374215.5_1,ENST00000452980.5_1,ENST00000442942.6_2,ENST00000450041.5_1,ENST00000423664.5_1,ENST00000421827.2_1	11,14,12,13,14,10,16,15,16,10,10,8,7,7,9,7	2243,2632,1300,2529,1541,2315,1776,1831,2027,2329,928,774,681,642,784,721	23065,21727,23038,21825,22807,22034,22585,34150,34052,13392,20221,16517,16392,12155,11647,8908	1241,1179,287,1179,285,1179,285,285,316,1179,214,161,203,139,127,288	14889,8168,10882,8168,8168,8530,8168,11343,11343,8168,8168,8168,8168,4870,3425,3370	0,0,0,0,0,0,0,0,0,0,0,0,0,0,0,0	11,16,12,15,14,12,16,15,16,12,12,10,9,9,11,9
ENSG00000169442.8_2	chr1	26644448	26647014	+	935	4	2	0	0	1	5	0	0	0	3	2	0	CD52	ENSG00000169442.8_2	3	ENST00000374213.2_1,ENST00000492808.5_1,ENST00000470468.1_1	2,2,3	466,579,378	2100,457,1988	352,466,153	2100,457,1531	184,0,0	1,-1,-1
ENSG00000176092.15_4	chr1	26648189	26686571	-	6895	257	205	62	53	163	130	60	0	8	295	173	178	CRYBG2	ENSG00000176092.15_4	11	ENST00000475866.3_2,ENST00000308182.9_2,ENST00000374211.5_1,ENST00000374208.1_1,ENST00000527815.6_2,ENST00000520372.5_1,ENST00000522923.5_1,ENST00000429942.2_1,ENST00000522993.1_1,ENST00000374207.4_1,ENST00000640960.1_2	22,20,4,4,18,4,6,9,6,7,3	6237,5225,687,465,4810,550,541,877,790,1346,431	32145,27046,2417,2692,25109,7224,5120,6875,1183,9996,13162	2967,2967,191,159,2967,264,139,139,266,778,253	7334,7324,1829,1829,7324,4477,4477,4477,338,7324,9747	0,0,0,0,0,0,0,0,0,0,0	22,20,6,6,20,6,8,11,8,6,5
ENSG00000225854.2_4	chr1	26653179	26653524	+	346	0	0	0	0	0	0	0	0	0	0	0	0	RP11-569G9.7	ENSG00000225854.2_4	1	ENST00000434718.2_1	1	345	0	345	0	0	-1
ENSG00000265143.1	chr1	26674956	26675210	-	255	1	0	1	0	0	0	0	0	0	0	1	1	RN7SL490P	ENSG00000265143.1	1	ENST00000579210.1	1	254	0	254	0	0	3
ENSG00000176083.17_2	chr1	26688125	26701013	-	2379	1	0	0	0	0	0	0	0	0	0	0	0	ZNF683	ENSG00000176083.17_2	9	ENST00000403843.5_1,ENST00000436292.5_1,ENST00000349618.7_1,ENST00000455900.5_1,ENST00000451801.5_1,ENST00000454975.1_1,ENST00000453132.5_1,ENST00000423508.5_1,ENST00000416125.1_1	7,7,6,4,4,4,3,4,5	1663,1705,1604,1076,932,588,659,740,848	9438,9435,9494,8724,5076,5229,7111,6981,8624	694,694,694,504,489,293,280,247,246	4087,4084,4084,5696,2367,2367,3879,3953,4678	0,0,0,0,0,0,0,0,0	7,7,6,6,6,6,5,6,7
ENSG00000131914.10_2	chr1	26737269	26756213	+	4008	1	1	0	2	0	0	0	0	7	19	2	4	LIN28A	ENSG00000131914.10_2	2	ENST00000326279.10_1,ENST00000254231.4_1	4,5	4004,3453	14940,15449	3480,2345	13721,13721	626,626	1,1
ENSG00000117682.16_2	chr1	26758773	26797785	+	5596	904	988	992	786	1419	1292	720	0	51	645	939	1009	DHDDS	ENSG00000117682.16_2	25	ENST00000434391.6_1,ENST00000427245.6_1,ENST00000527611.1_1,ENST00000374186.7_1,ENST00000525682.6_1,ENST00000236342.11_1,ENST00000526219.5_1,ENST00000374185.7_1,ENST00000487944.5_1,ENST00000360009.6_1,ENST00000533087.5_1,ENST00000531312.5_1,ENST00000525165.5_1,ENST00000525326.5_1,ENST00000525546.5_1,ENST00000528557.5_1,ENST00000526278.5_1,ENST00000436153.6_1,ENST00000529688.5_1,ENST00000530781.5_…	9,7,2,4,8,9,8,6,3,9,6,5,5,4,4,4,5,6,5,3,3,4,6,4,5	3329,861,295,652,1227,1394,1064,1142,714,3236,576,491,568,488,577,512,543,699,584,553,556,591,697,2669,624	35683,15388,515,10099,35807,35706,35822,14692,5675,35703,14673,13526,13423,9904,9857,10006,13503,14550,13400,5328,9607,13027,26556,25789,20539	2399,209,242,372,478,544,331,617,566,2402,142,142,150,223,270,158,165,142,165,320,282,230,142,2402,234	10131,5160,515,5160,11359,10131,10131,5160,5160,10131,5160,5160,5160,5160,5160,5160,5160,5160,5160,5160,5160,5160,10131,11359,10131	219,591,0,0,893,994,878,625,0,997,0,0,0,0,0,0,0,0,0,0,0,0,0,506,482	2,2,-1,-1,2,2,2,2,-1,2,2,2,2,2,2,-1,-1,2,-1,2,-1,-1,1,-1,-1
ENSG00000223583.1_4	chr1	26781144	26781678	-	535	0	2	2	1	1	1	4	0	0	13	4	4	RP3-476K8.4	ENSG00000223583.1_4	1	ENST00000446498.1_1	1	534	0	534	0	0	3
ENSG00000225891.1_4	chr1	26789247	26793773	-	529	7	7	10	11	5	6	15	0	0	31	13	6	RP3-476K8.3	ENSG00000225891.1_4	1	ENST00000423060.1_1	4	525	4001	234	2771	0	6
ENSG00000198830.10_2	chr1	26798941	26802463	+	2509	2177	2594	4548	3772	2670	2584	3414	4	21	1708	2945	3048	HMGN2	ENSG00000198830.10_2	10	ENST00000468388.5_1,ENST00000479815.5_1,ENST00000460563.5_1,ENST00000464888.5_1,ENST00000463817.5_1,ENST00000619352.4_1,ENST00000467700.5_1,ENST00000361427.5_1,ENST00000466194.1_1,ENST00000493418.1_1	4,4,5,5,6,7,6,6,5,2	316,1026,1040,560,847,1141,926,1185,947,1494	1362,1739,1915,2092,2210,2314,2183,2268,1412,437	177,652,432,249,455,857,513,859,452,788	833,856,856,856,856,856,856,856,446,437	0,0,0,0,0,267,0,267,0,0	-1,-1,-1,-1,-1,2,-1,1,-1,-1
ENSG00000224129.1_3	chr1	26845845	26846741	-	897	0	0	0	0	0	0	0	0	0	0	0	0	RP11-492M19.1	ENSG00000224129.1_3	1	ENST00000418220.1_1	1	896	0	896	0	0	3
ENSG00000117676.13_4	chr1	26856252	26901521	+	5884	1126	1275	1178	983	1472	1257	1076	4	43	1449	1953	2077	RPS6KA1	ENSG00000117676.13_4	20	ENST00000525525.5_1,ENST00000526040.6_1,ENST00000374168.6_2,ENST00000524436.5_1,ENST00000374166.8_1,ENST00000526792.5_1,ENST00000529454.5_3,ENST00000530003.5_3,ENST00000366866.8_1,ENST00000531113.5_1,ENST00000374163.5_1,ENST00000530607.1_1,ENST00000531382.5_2,ENST00000525582.1_1,ENST00000527264.5_1,ENST00000474934.1_1,ENST00000488985.1_1,ENST00000403732.2_1,ENST00000530305.1_1,ENST00000438977.1_1	4,5,22,5,22,22,7,21,7,18,22,4,21,2,5,3,5,5,2,4	539,495,3164,555,3109,2574,537,3002,585,2071,3180,576,2338,484,525,854,299,493,553,635	16683,23205,42094,21173,42127,40639,22386,28900,9711,27000,26008,5165,26086,206,6679,1835,1538,13972,239,1829	222,222,946,208,935,352,110,935,116,384,951,190,197,401,233,744,88,158,381,357	9898,14428,9898,9898,9898,9898,10220,9786,4127,9786,9786,4127,9786,206,4127,1668,491,9786,239,931	169,156,2186,0,2153,1913,0,2139,332,0,608,0,2214,0,0,0,0,0,0,344	1,1,1,-1,1,4,3,1,1,-1,1,-1,1,-1,-1,-1,-1,-1,-1,-1
ENSG00000238705.1	chr1	26881033	26881084	+	52	0	1	1	1	4	1	1	0	1	5	2	2	MIR1976	ENSG00000238705.1	1	ENST00000459548.1	1	51	0	51	0	0	-1
ENSG00000243905.2	chr1	26919737	26920037	-	301	0	0	0	0	0	0	0	0	0	0	0	0	RN7SL679P	ENSG00000243905.2	1	ENST00000497096.2	1	300	0	300	0	0	3
ENSG00000252802.1	chr1	26920431	26920532	-	102	0	0	0	0	0	0	0	0	0	0	0	0	Y_RNA	ENSG00000252802.1	1	ENST00000516993.1	1	101	0	101	0	0	3
ENSG00000229247.2_4	chr1	26966868	26967105	-	238	0	0	0	0	0	0	0	0	0	0	0	0	RP11-492M19.3	ENSG00000229247.2_4	1	ENST00000428860.2_1	1	237	0	237	0	0	3
ENSG00000238316.1	chr1	26968777	26968880	-	104	0	0	0	0	0	0	0	0	0	0	0	0	snoU13	ENSG00000238316.1	1	ENST00000459201.1	1	103	0	103	0	0	3
ENSG00000235069.2_4	chr1	26973938	26974172	+	235	0	0	0	0	0	0	0	0	0	0	0	0	RP4-785J1.1	ENSG00000235069.2_4	1	ENST00000443847.2_1	1	234	0	234	0	0	-1
ENSG00000260063.1_4	chr1	27018623	27020622	-	2000	15	21	18	19	13	12	15	0	0	15	13	12	RP5-968P14.2	ENSG00000260063.1_4	1	ENST00000569378.1_1	1	1999	0	1999	0	0	3
ENSG00000117713.19_4	chr1	27019727	27108601	+	15928	1771	1551	2527	1223	1580	1137	3312	10	248	3093	2491	2581	ARID1A	ENSG00000117713.19_4	17	ENST00000430799.7_2,ENST00000637465.1_1,ENST00000324856.12_2,ENST00000457599.6_1,ENST00000524572.1_1,ENST00000374152.7_3,ENST00000615191.4_1,ENST00000636219.1_2,ENST00000636958.1_1,ENST00000636422.1_1,ENST00000430291.2_2,ENST00000636110.1_1,ENST00000636072.1_1,ENST00000466382.2_2,ENST00000636794.1_1,ENST00000532781.1_1,ENST00000637788.1_1	20,3,20,20,3,19,20,19,6,2,3,1,4,6,6,4,1	6501,696,8563,6248,543,6441,3784,7039,1382,1322,577,3449,1124,2693,1062,2579,3045	81440,34840,77514,78165,3067,45403,41737,45406,10746,291,4344,0,875,5523,872,3534,0	2154,416,3087,1794,212,1733,483,3079,312,830,296,3449,633,2157,572,1960,3045	36034,33551,32111,32111,1778,28064,28064,28064,7615,291,3120,0,431,3316,359,3067,0	5687,0,6838,6187,0,5690,3406,5693,0,0,0,0,0,429,0,563,0	2,2,1,1,2,1,1,-1,-1,-1,-1,-1,-1,-1,-1,-1,-1
ENSG00000266138.1	chr1	27090115	27090393	+	279	7	4	16	7	9	0	9	0	42	7	12	4	RN7SL501P	ENSG00000266138.1	1	ENST00000578818.1	1	278	0	278	0	0	-1
ENSG00000060642.10_3	chr1	27113963	27124889	+	3382	537	557	537	471	454	410	413	2	0	577	558	551	PIGV	ENSG00000060642.10_3	6	ENST00000430292.5_1,ENST00000472757.5_1,ENST00000078527.8_1,ENST00000431541.5_1,ENST00000374145.5_1,ENST00000455364.1_3	3,5,4,3,4,3	605,927,2363,713,2709,704	6173,8916,8040,5585,7489,4949	334,431,1121,296,1121,468	3220,3220,3220,3220,3220,3220	0,222,1479,0,1479,0	2,2,2,2,2,2
ENSG00000241188.2	chr1	27141313	27141601	+	289	0	0	1	1	0	1	0	0	0	0	0	0	RN7SL165P	ENSG00000241188.2	1	ENST00000477476.2	1	288	0	288	0	0	-1
ENSG00000204160.11_4	chr1	27153201	27184093	+	5436	846	809	877	654	731	688	634	1	10	839	1027	1188	ZDHHC18	ENSG00000204160.11_4	5	ENST00000374142.8_3,ENST00000374141.6_3,ENST00000534643.5_4,ENST00000488397.3_1,ENST00000478902.1_1	8,8,6,7,2	5012,994,591,1268,560	25879,20965,18563,5972,1522	3875,237,160,754,458	16001,16001,16001,2360,1522	1159,755,0,478,0	1,2,2,-1,-1
ENSG00000175793.11_3	chr1	27189629	27190948	+	1320	513	550	149	117	413	389	117	1	12	498	583	646	SFN	ENSG00000175793.11_3	1	ENST00000339276.5_1	1	1319	0	1319	0	746	1
ENSG00000226698.1_4	chr1	27202624	27204736	+	306	0	0	0	0	0	0	0	0	0	0	0	0	RP1-50O24.6	ENSG00000226698.1_4	1	ENST00000448791.1_1	2	304	1808	177	1808	0	-1
ENSG00000142751.14_2	chr1	27202624	27216788	-	4979	834	653	968	793	722	716	737	2	355	695	969	942	GPN2	ENSG00000142751.14_2	5	ENST00000374135.8_1,ENST00000374133.3_1,ENST00000477418.2_1,ENST00000431781.2_1,ENST00000461282.1_1	5,4,3,5,2	4673,711,746,734,134	9491,6438,6094,5293,2764	3616,373,368,315,91	4411,4411,4411,2836,2764	0,0,0,0,0	5,4,5,3,4
ENSG00000198746.12_3	chr1	27216979	27226957	-	2225	540	664	568	407	682	487	454	0	23	458	566	620	GPATCH3	ENSG00000198746.12_3	3	ENST00000445019.5_2,ENST00000361720.9_1,ENST00000450844.1_1	3,7,3	543,2116,518	2417,7861,1317	363,737,222	1819,2891,1185	318,0,0	3,7,5
ENSG00000090273.13_3	chr1	27226729	27273353	+	2856	3340	4835	4096	1976	3299	1906	1934	12	229	3099	4820	5265	NUDC	ENSG00000090273.13_3	4	ENST00000435827.6_3,ENST00000321265.9_1,ENST00000452707.1_1,ENST00000484772.1_1	7,9,5,2	814,1791,811,605	41724,23345,19823,444	203,732,350,551	17291,17291,17291,444	0,987,0,0	3,1,2,-1
ENSG00000131910.4_2	chr1	27237980	27240457	-	1156	4411	4983	2091	1908	2858	2709	768	9	25	3772	4635	4669	NR0B2	ENSG00000131910.4_2	1	ENST00000254227.3_1	2	1154	1323	597	1323	0	2
ENSG00000175707.8_2	chr1	27276053	27286897	-	1793	126	114	63	43	60	54	96	1	0	129	116	120	KDF1	ENSG00000175707.8_2	2	ENST00000320567.5_1,ENST00000616918.1_1	4,5	1789,1646	9055,9174	1070,699	7938,7938	0,0	4,3
ENSG00000172746.6_3	chr1	27306656	27307466	+	497	0	0	1	1	0	1	1	0	0	1	1	1	RP11-344H11.4	ENSG00000172746.6_3	1	ENST00000310055.5_1	2	495	315	349	315	0	-1
ENSG00000224064.1_4	chr1	27310119	27310515	+	397	0	0	0	0	0	0	0	0	0	0	0	0	RP11-344H11.5	ENSG00000224064.1_4	1	ENST00000455684.1_1	1	396	0	396	0	0	-1
ENSG00000225294.1_3	chr1	27312388	27312831	-	444	2	3	7	3	1	6	0	0	0	1	4	4	RP11-344H11.6	ENSG00000225294.1_3	1	ENST00000437956.1_1	1	443	0	443	0	0	3
ENSG00000253368.3_4	chr1	27320198	27327389	+	1976	3253	3808	1878	1836	3121	3265	1194	6	173	2076	1781	1726	TRNP1	ENSG00000253368.3_4	2	ENST00000522111.2_4,ENST00000531285.1_4	2,2	1956,573	5235,5217	1051,311	5235,5217	683,151	1,-1
ENSG00000158246.7_2	chr1	27331511	27339327	-	2368	48	58	22	24	26	22	16	1	2	52	52	59	FAM46B	ENSG00000158246.7_2	1	ENST00000289166.5_1	2	2366	5450	1937	5450	0	2
ENSG00000090020.10_2	chr1	27425306	27493472	-	5974	242	136	201	121	199	150	198	0	11	270	184	149	SLC9A1	ENSG00000090020.10_2	6	ENST00000374089.5_1,ENST00000263980.7_1,ENST00000490329.1_1,ENST00000447808.1_1,ENST00000374086.3_1,ENST00000374084.2_1	7,12,2,6,5,4	3158,4504,658,881,2178,691	2049,51591,208,1569,46969,52057	1829,1829,470,299,636,378	559,39697,208,559,39697,39697	0,0,0,0,0,0	9,12,4,8,5,6
ENSG00000229985.2_4	chr1	27503242	27503768	+	527	0	0	0	0	0	0	0	0	0	0	0	0	RP11-40H20.5	ENSG00000229985.2_4	1	ENST00000457038.1_1	1	526	0	526	0	0	-1
ENSG00000214973.3_3	chr1	27527325	27527964	-	640	4	3	1	4	0	5	2	0	0	1	0	2	RP11-40H20.1	ENSG00000214973.3_3	1	ENST00000446783.1_1	1	639	0	639	0	0	3
ENSG00000225159.1_3	chr1	27533421	27534287	+	867	19	35	29	24	8	13	12	0	0	13	35	29	RP11-40H20.2	ENSG00000225159.1_3	1	ENST00000449818.1_1	1	866	0	866	0	0	-1
ENSG00000225990.2_3	chr1	27537756	27537975	+	220	0	0	0	0	0	0	0	0	0	0	0	0	RP11-40H20.3	ENSG00000225990.2_3	1	ENST00000438350.2_1	1	219	0	219	0	0	-1
ENSG00000224311.1_4	chr1	27555597	27560843	-	379	0	0	0	0	0	0	0	0	0	0	0	0	RP11-40H20.4	ENSG00000224311.1_4	1	ENST00000425205.1_1	3	376	4870	157	4210	0	5
ENSG00000142784.15_2	chr1	27561007	27635124	+	6024	332	323	406	251	429	347	373	1	3	397	351	362	WDTC1	ENSG00000142784.15_2	5	ENST00000319394.7_1,ENST00000361771.7_1,ENST00000447062.2_1,ENST00000491239.2_1,ENST00000472249.2_1	16,16,16,10,3	4803,4259,3099,5139,625	69314,69317,44094,15771,1251	2447,2058,1257,2433,264	26005,26005,19004,4354,993	2019,2016,1833,0,376	2,2,1,-1,-1
ENSG00000252098.1	chr1	27581955	27582058	-	104	0	0	0	0	0	0	0	0	0	0	0	0	Y_RNA	ENSG00000252098.1	1	ENST00000516289.1	1	103	0	103	0	0	3
ENSG00000243659.1_4	chr1	27637731	27638329	+	282	3	1	2	3	0	0	1	0	0	0	3	2	RP11-4K3__A.3	ENSG00000243659.1_4	1	ENST00000428741.2_1	2	280	318	175	318	0	-1
ENSG00000186501.14_4	chr1	27648636	27662891	+	4476	673	671	812	646	668	626	546	1	8	595	712	768	TMEM222	ENSG00000186501.14_4	11	ENST00000611517.4_2,ENST00000374076.8_2,ENST00000464720.5_1,ENST00000608611.5_2,ENST00000466759.5_1,ENST00000486082.5_1,ENST00000464813.5_1,ENST00000478104.5_1,ENST00000498220.1_2,ENST00000471456.1_1,ENST00000470223.1_1	6,6,7,6,4,8,5,7,7,3,2	1607,1593,1658,1505,364,986,1066,979,672,2858,2839	12647,12647,12495,12647,9941,12408,11549,12560,12573,1195,97	1020,1021,1021,1021,137,269,745,445,166,1708,2248	8329,8329,8329,8329,8329,8329,8329,8329,8329,1098,97	621,621,216,522,239,216,439,459,593,0,0	1,1,1,1,1,1,1,1,-1,-1,-1
ENSG00000206888.1	chr1	27651710	27651816	+	107	9	5	9	7	8	7	12	0	0	15	9	6	RNU6-48P	ENSG00000206888.1	1	ENST00000384161.1	1	106	0	106	0	0	-1
ENSG00000241547.1_3	chr1	27651820	27652287	+	468	22	28	30	22	31	31	33	0	0	33	29	52	RP11-4K3__A.5	ENSG00000241547.1_3	1	ENST00000486001.1_1	1	467	0	467	0	0	-1
ENSG00000142765.17_4	chr1	27668511	27680428	+	5584	299	229	428	359	471	459	488	3	102	676	511	537	SYTL1	ENSG00000142765.17_4	11	ENST00000618673.4_1,ENST00000318074.9_3,ENST00000616558.4_3,ENST00000483926.5_1,ENST00000473280.1_3,ENST00000543823.1_3,ENST00000490170.5_1,ENST00000496001.5_1,ENST00000485269.1_1,ENST00000615284.1_1,ENST00000475199.1_1	14,15,15,13,3,14,8,6,5,4,2	1698,1885,1863,2512,309,2215,2673,870,890,789,2233	10183,10025,9989,9361,3921,6842,3713,1199,942,2073,225	228,228,228,513,228,652,1938,289,513,261,2016	3147,3147,3147,2930,2025,1896,1728,309,309,1728,225	1481,1639,1675,0,0,1675,0,0,0,0,0	2,2,2,-1,2,1,-1,-1,-1,-1,-1
ENSG00000142733.14_3	chr1	27681675	27693383	-	4951	137	138	98	68	91	80	74	0	2	221	168	164	MAP3K6	ENSG00000142733.14_3	8	ENST00000486046.5_1,ENST00000472410.5_1,ENST00000374040.7_2,ENST00000493901.5_2,ENST00000470890.1_1,ENST00000357582.2_2,ENST00000476509.1_1,ENST00000495230.1_1	3,20,28,30,5,29,2,2	441,2510,4281,4279,951,4107,738,512	846,6257,7391,7424,860,7368,286,135	285,192,600,425,577,608,524,415	557,2116,1346,1346,289,1346,286,135	198,136,0,0,0,0,0,0	3,20,28,30,7,29,4,4
ENSG00000142748.12_2	chr1	27695603	27701315	-	2167	0	0	0	0	0	0	0	0	0	0	0	0	FCN3	ENSG00000142748.12_2	4	ENST00000270879.8_1,ENST00000354982.2_1,ENST00000498393.1_1,ENST00000481748.1_1	8,7,3,2	1022,990,928,998	4690,4722,2277,277	365,365,542,921	2164,2164,2164,277	0,0,0,0	8,7,5,4
ENSG00000174950.10_2	chr1	27705666	27709870	-	2039	0	0	0	0	0	0	0	0	0	1	0	0	CD164L2	ENSG00000174950.10_2	3	ENST00000374027.7_2,ENST00000374030.2_2,ENST00000374025.4_1	7,8,5	1448,983,940	2679,3221,590	1019,333,623	1585,1585,485	0,0,0	7,8,7
ENSG00000231207.1_4	chr1	27715972	27716649	+	355	0	0	0	0	0	0	0	0	0	0	0	0	RP1-144C9.2	ENSG00000231207.1_4	1	ENST00000443746.1_1	2	353	324	184	324	0	-1
ENSG00000181773.6_2	chr1	27719148	27722318	+	2115	106	86	98	63	125	83	18	1	0	257	210	245	GPR3	ENSG00000181773.6_2	1	ENST00000374024.3_1	2	2113	1057	2020	1057	992	2
ENSG00000158195.10_2	chr1	27730730	27816669	-	5666	1436	1516	1660	923	1480	1107	1565	3	40	2716	2255	2324	WASF2	ENSG00000158195.10_2	2	ENST00000618852.4_1,ENST00000536657.1_1	10,8	5656,1075	80283,80796	2736,172	61054,61054	0,0	9,8
ENSG00000241169.1_4	chr1	27783709	27786093	+	428	0	0	0	0	0	0	0	0	0	0	0	0	RP4-752I6.1	ENSG00000241169.1_4	1	ENST00000492975.1_1	2	426	1958	286	1958	0	-1
ENSG00000237429.1_4	chr1	27852316	27857072	+	283	0	0	0	4	1	1	3	0	0	19	8	6	RP1-159A19.4	ENSG00000237429.1_4	1	ENST00000443579.1_1	2	281	4475	201	4475	0	-1
ENSG00000126705.14_3	chr1	27860546	27930942	-	8297	281	233	300	148	209	147	263	3	34	403	319	351	AHDC1	ENSG00000126705.14_3	16	ENST00000247087.10_2,ENST00000644989.1_1,ENST00000374011.6_1,ENST00000642416.1_1,ENST00000642245.1_1,ENST00000643308.1_1,ENST00000487743.3_2,ENST00000490295.2_2,ENST00000644833.1_1,ENST00000644550.1_1,ENST00000645669.1_1,ENST00000480033.3_2,ENST00000644119.1_1,ENST00000643219.1_1,ENST00000646921.1_1,ENST00000646642.1_1	6,6,7,7,9,9,5,4,2,3,4,4,4,5,4,3	6329,6097,6431,5727,5979,2052,536,738,627,455,801,584,470,700,498,598	63228,63109,62898,63789,63487,51223,6157,50180,145,14664,49691,50701,50164,49925,45356,44751	4928,4928,4928,4928,4928,981,182,433,471,234,236,271,177,225,201,435	44514,44514,44514,44514,44514,44514,5120,44514,145,9143,44514,44514,44514,44514,44514,44514	-4807,-4807,-4807,-4807,-4807,0,0,0,0,0,0,0,0,0,0,0	5,5,6,6,8,11,7,6,4,5,6,6,6,7,6,5
ENSG00000000938.12_2	chr1	27938575	27961788	-	3474	1	0	0	0	0	0	0	0	0	1	0	1	FGR	ENSG00000000938.12_2	7	ENST00000374005.7_1,ENST00000399173.5_1,ENST00000374004.5_1,ENST00000374003.7_1,ENST00000457296.5_1,ENST00000475472.5_1,ENST00000468038.1_1	13,13,11,13,9,3,3	2716,2470,2339,2008,1095,676,778	20497,11478,9423,11892,9526,11074,2055	1058,830,822,453,238,545,522	9914,4263,4263,4263,4263,9914,1160	0,0,0,0,0,0,0	13,13,11,13,11,5,5
ENSG00000235912.1_4	chr1	27975930	27976121	+	192	5	7	12	7	4	5	14	0	0	3	10	12	RP1-159A19.3	ENSG00000235912.1_4	1	ENST00000433132.1_1	1	191	0	191	0	0	-1
ENSG00000233975.1_4	chr1	27986839	27989233	-	441	0	1	0	0	0	0	0	0	0	0	0	0	RP11-288L9.1	ENSG00000233975.1_4	1	ENST00000440492.1_1	2	439	1955	394	1955	0	4
ENSG00000126709.14_2	chr1	27992572	27998729	-	865	159	173	57	69	227	147	75	3	112	964	306	393	IFI6	ENSG00000126709.14_2	3	ENST00000361157.10_1,ENST00000339145.8_1,ENST00000362020.4_1	5,5,5	836,817,823	5321,5297,5309	414,411,409	2777,2777,2777	0,0,0	5,5,5
ENSG00000225886.3_4	chr1	27995979	28029574	+	1651	0	1	0	0	0	0	0	0	0	1	0	1	RP11-288L9.4	ENSG00000225886.3_4	6	ENST00000430683.1_1,ENST00000626608.2_2,ENST00000628586.2_2,ENST00000625232.2_2,ENST00000628584.2_2,ENST00000629895.1_2	2,3,3,5,3,4	487,373,636,653,475,606	321,13508,20906,32848,33084,32967	369,192,455,190,248,262	321,7320,14718,26942,26942,26942	0,0,0,0,0,0	-1,-1,-1,-1,-1,-1
ENSG00000206767.1	chr1	28002114	28002220	-	107	0	0	0	0	0	0	0	0	0	0	0	0	RNU6-949P	ENSG00000206767.1	1	ENST00000384040.1	1	106	0	106	0	0	3
ENSG00000226662.2_3	chr1	28013321	28013982	-	662	0	0	0	0	0	0	0	0	0	0	0	0	RP11-288L9.3	ENSG00000226662.2_3	1	ENST00000445563.2_1	1	661	0	661	0	0	3
ENSG00000207095.1	chr1	28020242	28020346	+	105	0	0	0	0	0	0	0	0	0	0	0	0	RNU6-424P	ENSG00000207095.1	1	ENST00000384367.1	1	104	0	104	0	0	-1
ENSG00000009780.15_4	chr1	28052490	28089633	+	4034	396	495	598	474	514	475	444	1	54	470	539	579	FAM76A	ENSG00000009780.15_4	7	ENST00000373954.10_2,ENST00000419687.6_1,ENST00000530324.5_2,ENST00000234549.11_1,ENST00000373949.5_1,ENST00000010299.10_1,ENST00000446647.1_1	9,7,8,9,8,10,4	3558,1654,1019,983,2265,1040,500	33585,33823,32717,33570,33671,33484,14911	2627,978,238,157,1469,157,227	10471,11997,10471,10471,10471,10471,10384	915,677,859,930,829,1016,371	1,1,1,1,1,1,-1
ENSG00000231344.1_4	chr1	28065602	28065950	+	349	9	8	4	4	3	7	6	0	0	6	14	8	RP3-426I6.2	ENSG00000231344.1_4	1	ENST00000446554.1_1	1	348	0	348	0	0	-1
ENSG00000230833.1_3	chr1	28066465	28067140	+	676	11	11	15	13	7	7	8	0	0	7	14	14	RP3-426I6.3	ENSG00000230833.1_3	1	ENST00000425462.1_1	1	675	0	675	0	0	-1
ENSG00000117758.13_3	chr1	28099694	28150963	+	3846	611	706	706	668	1019	1026	756	2	6	701	965	1032	STX12	ENSG00000117758.13_3	5	ENST00000373943.8_1,ENST00000440806.2_1,ENST00000468761.1_1,ENST00000481874.1_1,ENST00000472285.1_1	9,7,4,2,3	3070,711,699,437,370	48199,38322,28085,1874,7457	2221,190,361,366,223	16137,16137,16137,1874,5583	822,0,0,0,0	1,1,-1,-1,-1
ENSG00000269971.1_5	chr1	28100369	28100552	+	184	9	14	11	8	15	13	11	0	0	10	10	8	RP3-426I6.5	ENSG00000269971.1_5	1	ENST00000602607.1_1	1	183	0	183	0	0	-1
ENSG00000270031.1_5	chr1	28146494	28146852	+	359	3	6	3	3	4	3	1	0	0	6	8	6	RP3-426I6.6	ENSG00000270031.1_5	1	ENST00000602843.1_1	1	358	0	358	0	0	-1
ENSG00000223062.1	chr1	28151049	28151154	+	106	0	0	0	0	2	1	1	0	0	1	0	0	RNU6-1245P	ENSG00000223062.1	1	ENST00000411130.1	1	105	0	105	0	0	-1
ENSG00000117751.17_3	chr1	28157289	28178187	+	2819	1268	1793	2297	2112	1556	1389	1704	8	3	1266	2164	2296	PPP1R8	ENSG00000117751.17_3	5	ENST00000311772.9_1,ENST00000236412.11_1,ENST00000373931.8_1,ENST00000431586.1_3,ENST00000486634.2_1	7,6,7,7,2	2337,2408,2644,1022,457	18561,18306,18206,18086,1126	1583,1435,1579,339,321	5883,5883,5883,5883,1126	1049,382,626,0,0	1,5,4,4,-1
ENSG00000252947.1	chr1	28160912	28161077	+	166	27	39	33	24	16	21	17	0	0	9	27	20	SCARNA1	ENSG00000252947.1	1	ENST00000517138.1	1	165	0	165	0	0	-1
ENSG00000268552.1	chr1	28177085	28177255	-	171	0	0	0	0	0	0	0	0	0	0	0	0	AL109927.1	ENSG00000268552.1	1	ENST00000601459.1	1	170	0	170	0	-166	1
ENSG00000130775.15_2	chr1	28199054	28213196	+	4621	12	18	22	19	25	15	12	0	5	35	33	33	THEMIS2	ENSG00000130775.15_2	11	ENST00000328928.11_1,ENST00000373925.5_1,ENST00000373927.7_1,ENST00000427466.1_1,ENST00000442118.5_1,ENST00000467258.1_1,ENST00000373921.7_1,ENST00000466068.1_1,ENST00000482828.1_1,ENST00000456990.1_1,ENST00000492877.1_1	7,5,4,2,3,3,6,4,2,5,2	2330,1645,1078,413,751,759,2681,709,475,1921,2859	11812,12496,12906,6979,9166,12100,11424,9323,5785,5021,416	818,818,666,304,504,530,1072,410,431,806,2053	3923,5241,8567,6979,5243,9848,3923,3948,5785,2252,416	1538,779,369,0,0,0,1926,0,0,1170,0	1,1,1,1,1,-1,1,-1,-1,-1,-1
ENSG00000117748.9_2	chr1	28218035	28241257	-	2019	733	862	1282	1206	838	852	829	1	2	537	815	851	RPA2	ENSG00000117748.9_2	5	ENST00000373912.7_1,ENST00000419958.5_1,ENST00000373909.7_1,ENST00000313433.11_1,ENST00000444045.1_1	9,5,9,8,6	1743,549,1153,1229,676	21476,4998,21669,21211,16907	723,170,323,450,166	9221,2608,9221,9221,9221	0,186,0,0,0	9,4,9,8,8
ENSG00000130768.14_3	chr1	28261504	28285668	+	2670	22	20	18	15	13	9	7	0	0	8	10	14	SMPDL3B	ENSG00000130768.14_3	6	ENST00000373894.7_1,ENST00000548116.5_1,ENST00000411604.5_2,ENST00000373888.8_1,ENST00000466793.1_1,ENST00000549094.1_2	8,8,7,7,5,7	1870,1905,946,1541,721,1604	22294,22223,19726,19900,9668,22437	681,681,213,531,213,675	9988,9988,7031,9988,4808,9988	1360,306,0,1115,0,1217	1,1,1,1,-1,1
ENSG00000227050.1_4	chr1	28265386	28286704	-	491	0	1	0	0	0	0	0	0	0	1	1	0	RP11-460I13.2	ENSG00000227050.1_4	1	ENST00000448015.1_1	5	486	20832	204	16692	0	7
ENSG00000158156.7_2	chr1	28285973	28294607	+	2743	210	198	224	171	220	195	145	1	1	115	216	223	XKR8	ENSG00000158156.7_2	2	ENST00000373884.5_1,ENST00000481387.1_1	3,3	2689,313	5945,2760	1593,207	3135,2268	1185,0	1,-1
ENSG00000158161.15_4	chr1	28296855	28415207	-	6483	1090	1232	1527	1245	1528	1339	1076	5	53	880	1243	1228	EYA3	ENSG00000158161.15_4	8	ENST00000373871.7_2,ENST00000540618.5_2,ENST00000436342.6_1,ENST00000373864.5_1,ENST00000373863.3_1,ENST00000495923.5_1,ENST00000471498.5_1,ENST00000468665.1_1	18,17,17,14,17,7,17,4	6067,5868,5926,2445,1712,826,1789,693	112285,112422,112364,82174,109579,21787,98329,24190	4202,4199,4199,1078,183,183,183,290	30430,30430,30430,21600,30430,6528,30430,18305	0,0,0,0,0,0,0,0	18,17,17,14,17,9,19,6
ENSG00000238231.2_4	chr1	28316669	28317035	-	367	11	6	11	8	12	8	5	0	0	6	7	7	RP11-460I13.6	ENSG00000238231.2_4	1	ENST00000426041.2_1	1	366	0	366	0	0	3
ENSG00000240750.2	chr1	28358397	28358691	-	295	15	15	7	13	17	13	5	0	3	17	29	21	RN7SL559P	ENSG00000240750.2	1	ENST00000476501.2	1	294	0	294	0	0	3
ENSG00000228589.3_3	chr1	28422253	28422933	-	681	25	20	23	10	12	13	14	0	1	13	20	23	RP5-1053E7.1	ENSG00000228589.3_3	1	ENST00000436160.1_1	1	680	0	680	0	0	3
ENSG00000228943.1_4	chr1	28436250	28436809	+	235	0	0	0	0	0	0	0	0	0	0	0	0	RP5-1053E7.2	ENSG00000228943.1_4	1	ENST00000443484.1_1	2	233	326	138	326	0	-1
ENSG00000214812.3_4	chr1	28446960	28447832	-	557	0	0	0	0	1	0	0	0	0	0	0	0	RP5-1053E7.3	ENSG00000214812.3_4	1	ENST00000399029.3_1	2	555	317	486	317	0	4
ENSG00000253005.1	chr1	28469248	28469352	-	105	0	0	0	0	0	0	0	0	0	0	0	0	RNU6-176P	ENSG00000253005.1	1	ENST00000517196.1	1	104	0	104	0	0	3
ENSG00000252429.1	chr1	28470667	28470728	-	62	0	0	0	0	0	0	0	0	0	0	0	0	RNU7-29P	ENSG00000252429.1	1	ENST00000516620.1	1	61	0	61	0	0	3
ENSG00000169403.11_2	chr1	28473677	28520447	-	4706	63	61	15	12	14	9	18	2	33	361	168	185	PTAFR	ENSG00000169403.11_2	3	ENST00000373857.7_1,ENST00000539896.1_1,ENST00000305392.3_1	2,3,2	4489,4188,1537	25533,42582,42663	3893,3893,1386	25533,25533,42663	-1024,-1024,-1024	2,3,2
ENSG00000126698.10_2	chr1	28525967	28559536	-	2888	2520	3491	3355	3190	2612	2685	2744	5	31	1775	2980	2959	DNAJC8	ENSG00000126698.10_2	6	ENST00000603289.5_1,ENST00000263697.5_1,ENST00000489277.5_1,ENST00000470967.1_1,ENST00000482674.5_1,ENST00000488868.1_1	5,9,10,2,4,5	478,1750,1590,558,717,781	5416,30997,30876,2993,22127,22006	118,1092,811,467,477,404	2377,13926,13926,2993,13926,13926	165,0,0,0,0,0	4,9,12,4,6,7
ENSG00000215902.1	chr1	28527013	28527152	-	66	290	462	404	403	316	304	351	1	0	204	349	346	AL353354.1	ENSG00000215902.1	1	ENST00000321830.5	2	64	75	47	75	0	4
ENSG00000269804.1	chr1	28527070	28527419	+	350	0	0	0	0	0	0	0	0	0	0	0	0	AL353354.2	ENSG00000269804.1	1	ENST00000596102.1	1	349	0	349	0	146	1
ENSG00000130770.17_2	chr1	28562620	28573417	+	2225	996	1131	1112	866	557	500	919	2	15	1046	1538	1514	ATPIF1	ENSG00000130770.17_2	4	ENST00000497986.5_1,ENST00000335514.9_1,ENST00000468425.2_1,ENST00000465645.1_1	3,3,3,2	596,491,536,1853	1400,1476,10228,91	344,263,317,1737	1309,1385,10137,91	213,318,225,181	1,1,1,1
ENSG00000270605.1_4	chr1	28566020	28567964	-	1945	100	38	106	78	46	70	98	0	87	110	103	88	RP5-1092A3.4	ENSG00000270605.1_4	1	ENST00000604716.1_1	1	1944	0	1944	0	0	3
ENSG00000271398.1_4	chr1	28573655	28574079	+	425	4	5	0	0	0	3	2	0	0	0	3	2	RP5-1092A3.5	ENSG00000271398.1_4	1	ENST00000605846.1_1	1	424	0	424	0	0	-1
ENSG00000130766.4_2	chr1	28586038	28609002	+	3453	849	879	975	696	969	810	918	8	144	2351	1946	2086	SESN2	ENSG00000130766.4_2	1	ENST00000253063.3_1	10	3443	19521	1775	9246	1433	1
ENSG00000130772.13_2	chr1	28655513	28662478	+	2019	336	539	398	374	363	351	355	0	1579	273	307	272	MED18	ENSG00000130772.13_2	5	ENST00000479574.5_1,ENST00000373842.8_1,ENST00000398997.2_1,ENST00000475655.1_1,ENST00000474683.1_1	3,3,4,2,3	859,1830,1102,313,398	5155,5099,5807,1417,3904	599,1550,669,195,168	3682,3682,3682,1417,3682	0,625,625,0,0	-1,2,2,-1,-1
ENSG00000204138.12_3	chr1	28696093	28826881	+	7322	1523	1793	2044	1061	1578	1060	2112	6	3712	2641	2474	2624	PHACTR4	ENSG00000204138.12_3	9	ENST00000633371.1_1,ENST00000373839.7_1,ENST00000632202.1_1,ENST00000632421.1_1,ENST00000463428.5_1,ENST00000493669.2_1,ENST00000633167.1_1,ENST00000373836.4_1,ENST00000632964.1_1	5,14,7,15,6,17,4,13,4	592,6176,911,3360,1415,3061,549,3094,1849	89065,124591,96064,124476,96087,124352,21586,56039,6820	243,3835,216,1011,859,622,279,769,944	37585,51622,50369,37585,51622,50369,19402,20655,3443	0,2096,0,124,0,189,0,2126,0	-1,2,2,2,-1,2,1,1,-1
ENSG00000206779.1	chr1	28749066	28749166	-	101	0	0	0	0	0	0	0	0	0	1	0	0	Y_RNA	ENSG00000206779.1	1	ENST00000384052.1	1	100	0	100	0	0	3
ENSG00000229820.2_4	chr1	28780052	28780445	+	394	16	11	17	13	18	15	14	0	3	44	43	40	RP1-308E4.1	ENSG00000229820.2_4	1	ENST00000438601.2_1	1	393	0	393	0	0	-1
ENSG00000221216.1	chr1	28807874	28807992	+	119	5	2	9	1	5	6	8	0	0	3	4	5	RNU6ATAC27P	ENSG00000221216.1	1	ENST00000408289.1	1	118	0	118	0	0	-1
ENSG00000180198.15_3	chr1	28832455	28865812	+	3888	2743	3644	4868	3944	2795	2451	2509	10	37	2988	4472	4636	RCC1	ENSG00000180198.15_3	12	ENST00000398958.6_1,ENST00000427469.5_1,ENST00000434290.5_1,ENST00000373833.10_1,ENST00000419074.5_1,ENST00000373832.5_1,ENST00000373831.7_1,ENST00000411533.5_1,ENST00000486790.2_1,ENST00000430407.1_1,ENST00000429051.1_1,ENST00000478232.1_1	12,9,11,13,8,10,11,10,4,8,6,3	2703,894,1059,2831,989,2414,1566,1159,477,1113,532,506	30550,29015,28804,30412,24960,18433,18341,17450,12715,16485,3438,1299	1364,187,187,1468,187,1151,332,187,331,262,179,288	20953,20953,13005,12991,12991,11550,11550,11550,10901,10901,2700,933	1257,0,0,1257,0,1257,1349,0,0,0,0,0	4,4,4,5,3,2,2,2,1,2,-1,-1
ENSG00000242125.3_4	chr1	28832492	28837404	+	4088	9897	23766	12118	8926	8696	8481	5798	13	848	7264	9748	8805	SNHG3	ENSG00000242125.3_4	3	ENST00000413987.1_2,ENST00000447507.1_1,ENST00000437681.1_2	3,2,2	2198,183,2612	2714,2044,670	2062,142,1809	2044,2044,670	0,0,0	-1,-1,-1
ENSG00000200087.1	chr1	28835071	28835274	+	204	5718	17033	6300	4730	5092	5078	3272	8	38	5354	5622	4666	SNORA73B	ENSG00000200087.1	1	ENST00000363217.1	1	203	0	203	0	0	-1
ENSG00000238821.1	chr1	28843988	28844087	+	100	8	6	17	18	9	6	16	0	0	11	19	20	snoU13	ENSG00000238821.1	1	ENST00000459072.1	1	99	0	99	0	0	-1
ENSG00000231468.2_3	chr1	28852830	28853739	-	611	0	0	0	0	0	0	0	0	0	0	0	0	RP4-669K10.3	ENSG00000231468.2_3	1	ENST00000447051.2_1	2	609	300	315	300	0	4
ENSG00000279443.1_4	chr1	28870972	28873054	+	2083	9	2	4	2	1	4	1	0	25	11	7	10	RP4-669K10.8	ENSG00000279443.1_4	1	ENST00000624273.1_1	1	2082	0	2082	0	0	-1
ENSG00000180098.9_2	chr1	28879597	28905057	+	4311	442	481	503	503	507	525	495	1	154	407	538	492	TRNAU1AP	ENSG00000180098.9_2	10	ENST00000373830.4_1,ENST00000495995.5_1,ENST00000411406.3_1,ENST00000480930.5_1,ENST00000491577.5_1,ENST00000464880.5_1,ENST00000497790.5_1,ENST00000495215.5_1,ENST00000464093.1_1,ENST00000484775.1_1	9,5,2,10,8,4,3,6,3,8	1790,2035,448,1122,1602,605,570,477,1629,1000	23670,10668,503,23523,23056,7535,7229,13608,10201,16142	1045,1087,408,244,765,379,399,131,799,275	6896,6896,503,6896,6896,6896,6896,6896,6896,3763	855,0,0,0,0,0,0,0,0,0	1,-1,-1,-1,-1,-1,-1,-1,-1,-1
ENSG00000197989.13_4	chr1	28905050	28909495	-	3377	932	995	1201	1065	669	675	616	0	141	775	1082	1140	SNHG12	ENSG00000197989.13_4	12	ENST00000464612.5_1,ENST00000475441.5_1,ENST00000531126.5_1,ENST00000461448.5_1,ENST00000470977.5_1,ENST00000474814.1_1,ENST00000481368.5_1,ENST00000481220.5_1,ENST00000488745.5_1,ENST00000483436.5_1,ENST00000464115.1_1,ENST00000461832.1_1	4,5,6,4,5,3,4,5,6,6,3,3	715,439,713,1625,1093,1900,1584,746,1359,676,709,672	1757,2252,2583,1679,2241,1432,1539,2566,3083,2596,809,826	450,142,244,1113,448,1311,1317,263,893,228,311,287	853,853,853,853,853,853,853,944,861,853,448,465	0,0,0,0,0,0,0,0,0,0,0,0	6,7,8,6,7,5,6,7,8,8,5,5
ENSG00000221539.1	chr1	28905261	28905334	-	74	36	56	56	50	33	26	31	0	3	33	46	44	SNORD99	ENSG00000221539.1	1	ENST00000408612.1	1	73	0	73	0	0	3
ENSG00000120656.11_2	chr1	28915835	28969597	-	2337	234	321	322	249	390	407	344	2	5	213	450	438	TAF12	ENSG00000120656.11_2	4	ENST00000471683.5_1,ENST00000373824.8_1,ENST00000263974.4_1,ENST00000495422.1_1	5,6,6,5	839,1328,1353,619	27868,38888,38551,29219	451,724,473,251	14986,20827,20490,18962	0,0,0,0	7,6,6,7
ENSG00000188060.7_2	chr1	28918712	28921955	+	2200	388	513	407	325	228	193	263	3	227	904	1032	1005	RAB42	ENSG00000188060.7_2	2	ENST00000373826.3_2,ENST00000465518.2_2	2,2	1948,855	1295,950	1749,606	1295,950	317,655	2,1
ENSG00000229388.1_3	chr1	28969740	28975093	+	978	19	13	15	19	13	6	8	0	0	9	10	6	RP11-442N24__B.1	ENSG00000229388.1_3	2	ENST00000420776.1_1,ENST00000427804.1_1	2,2	622,686	4680,1804	333,388	4680,1804	0,0	-1,-1
ENSG00000270103.3_4	chr1	28975112	28975242	+	131	116	137	87	69	62	39	21	0	0	73	137	139	RNU11	ENSG00000270103.3_4	1	ENST00000602813.1_1	1	130	0	130	0	0	-1
ENSG00000162419.12_2	chr1	28995244	29045865	+	6459	326	249	460	326	292	301	273	2	36	439	676	633	GMEB1	ENSG00000162419.12_2	4	ENST00000373816.5_1,ENST00000361872.8_1,ENST00000294409.2_1,ENST00000480454.1_1	10,10,10,9	6400,1884,1902,2054	44221,44224,44191,29447	5280,813,800,992	14744,14747,14744,6334	1683,1683,1713,0	2,2,2,-1
ENSG00000252777.1	chr1	29016177	29016306	+	130	0	0	2	1	0	3	2	0	0	0	1	1	SCARNA24	ENSG00000252777.1	1	ENST00000516968.1	1	129	0	129	0	0	-1
ENSG00000198492.15_4	chr1	29063133	29096287	+	3859	2708	2887	3814	2826	2536	2337	3031	12	9	2950	4247	4399	YTHDF2	ENSG00000198492.15_4	9	ENST00000474884.5_3,ENST00000542507.5_3,ENST00000373812.7_3,ENST00000541996.5_2,ENST00000478283.5_1,ENST00000496288.5_1,ENST00000475796.5_1,ENST00000476976.1_1,ENST00000468863.1_1	5,6,5,4,4,4,3,3,3	859,2819,2920,2715,2590,875,355,654,684	5391,30334,30096,30120,29585,5162,4527,4495,3108	468,1583,1583,1583,1583,599,229,496,480	4065,24943,24943,24943,24943,4074,4065,4065,2005	0,1735,1735,1588,0,0,0,0,0	2,2,1,3,-1,1,-1,-1,-1
ENSG00000116329.10_2	chr1	29138654	29197779	+	9345	8	8	6	6	2	1	1	0	4	8	44	23	OPRD1	ENSG00000116329.10_2	2	ENST00000621425.1_1,ENST00000234961.6_1	4,3	1213,9342	49928,49783	468,8525	46344,46344	971,1116	1,1
ENSG00000226852.2	chr1	29194087	29197779	+	1747	3	0	2	1	0	0	0	0	1	2	7	1	RP1-212P9.2	ENSG00000226852.2	1	ENST00000443593.2	2	1745	1947	985	1947	0	-1
ENSG00000233427.1_4	chr1	29196995	29203848	-	1085	0	0	0	5	2	3	2	0	0	4	1	4	RP1-212P9.3	ENSG00000233427.1_4	1	ENST00000418471.1_1	3	1082	5771	519	4533	0	5
ENSG00000199756.1	chr1	29208238	29208347	-	110	0	0	0	0	0	0	0	0	0	0	0	0	Y_RNA	ENSG00000199756.1	1	ENST00000362886.1	1	109	0	109	0	0	3
ENSG00000159023.20_4	chr1	29213603	29446558	+	14805	2832	3297	2962	2437	3552	3540	2670	6	178	2439	2441	2480	EPB41	ENSG00000159023.20_4	33	ENST00000642260.1_1,ENST00000647103.1_1,ENST00000343067.8_2,ENST00000356093.6_2,ENST00000646189.1_1,ENST00000644342.1_1,ENST00000646800.1_1,ENST00000482464.6_2,ENST00000642937.1_1,ENST00000373800.7_2,ENST00000643155.1_1,ENST00000347529.7_2,ENST00000646260.1_1,ENST00000373798.5_2,ENST00000644600.1_1,ENST00000643173.1_1,ENST00000644780.1_1,ENST00000643604.1_1,ENST00000373797.2_2,ENST00000349460.9_2…	21,18,21,19,15,16,19,14,21,19,21,17,13,21,18,17,17,18,15,20,13,16,11,17,13,10,9,7,5,3,6,5,2	5947,5754,5935,5838,3962,6000,6369,2140,5875,2834,3008,2659,2488,5912,5577,5479,4134,5414,2392,2917,2951,3900,2960,4095,2411,3632,4173,904,926,259,916,5207,750	226982,227196,227020,227117,181104,179853,179621,176477,227037,227156,226982,227283,169304,220393,152172,152234,153609,152187,148255,199530,148373,80826,64043,80744,75585,53482,49782,29200,43814,38986,51248,18599,11401	3201,3222,3227,3227,1805,3790,3927,457,3214,457,474,474,474,3227,3127,3114,1921,3007,474,474,968,1860,1407,1964,625,2415,3148,356,449,176,302,3219,402	100221,100238,100221,100221,100238,100238,100238,100238,100238,100238,100221,100221,93594,93594,72663,72663,72663,72663,72663,72663,72663,18323,14546,14546,14546,13681,13678,13681,30997,32649,32649,11401,11401	1909,1791,2576,1853,1685,1615,1620,0,1950,1752,484,2313,0,2576,2347,2285,2231,2332,2149,2508,2031,0,0,0,1085,1441,1153,676,0,0,0,0,0	4,3,2,3,3,3,3,-1,3,4,2,2,2,2,2,2,2,2,2,2,2,-1,-1,-1,-1,-1,-1,-1,-1,-1,-1,-1,-1
ENSG00000225616.2_4	chr1	29308790	29309120	-	331	2	2	2	4	5	7	4	0	0	2	2	5	RP4-604A21.1	ENSG00000225616.2_4	1	ENST00000425821.2_1	1	330	0	330	0	0	3
ENSG00000206704.1	chr1	29312222	29312322	+	101	1	0	2	0	1	0	1	0	0	1	0	1	Y_RNA	ENSG00000206704.1	1	ENST00000383977.1	1	100	0	100	0	0	-1
ENSG00000253304.1_2	chr1	29445940	29450447	-	2639	75	80	68	57	52	38	50	1	9	114	121	89	TMEM200B	ENSG00000253304.1_2	2	ENST00000521452.1_1,ENST00000420504.2_1	2,2	2499,2551	2008,516	2420,2414	2008,516	-919,-919	2,2
ENSG00000225750.1_4	chr1	29471006	29473506	-	279	14	22	19	16	19	12	14	1	16	10	14	10	RP11-242O24.3	ENSG00000225750.1_4	1	ENST00000413004.1_1	3	276	2224	135	1806	0	5
ENSG00000116350.16_4	chr1	29474255	29508499	-	8893	2187	2274	2782	2029	2103	1972	2538	2	865	2625	2779	2696	SRSF4	ENSG00000116350.16_4	8	ENST00000373795.6_2,ENST00000634348.1_1,ENST00000466448.4_2,ENST00000622143.1_1,ENST00000497015.5_1,ENST00000605204.1_1,ENST00000477193.1_1,ENST00000489898.1_2	6,7,5,2,3,8,2,3	2381,8121,1259,612,513,1391,204,390	31863,17520,31952,4464,5353,25763,4464,695	1483,4991,555,435,213,244,166,194	21129,5373,21129,4464,4464,13008,4464,378	0,0,0,0,0,0,0,258	6,9,7,4,5,4,4,2
ENSG00000227637.1	chr1	29479001	29479503	+	320	0	0	0	0	0	1	0	0	0	0	0	0	RP11-242O24.5	ENSG00000227637.1	1	ENST00000450108.1	2	318	184	198	184	0	-1
ENSG00000116353.15_3	chr1	29519385	29557454	-	3922	324	326	418	364	342	315	382	1	58	232	256	246	MECR	ENSG00000116353.15_3	18	ENST00000373791.7_2,ENST00000475773.5_1,ENST00000483435.5_1,ENST00000263702.10_2,ENST00000473030.5_1,ENST00000463412.1_1,ENST00000453185.5_1,ENST00000478505.6_1,ENST00000490529.5_1,ENST00000464511.1_1,ENST00000463052.5_1,ENST00000489248.5_1,ENST00000475861.6_1,ENST00000474946.5_1,ENST00000464915.1_1,ENST00000482610.1_1,ENST00000484012.5_1,ENST00000493928.1_1	10,6,4,10,8,7,7,9,7,3,7,7,6,5,4,5,3,4	2406,774,567,1343,911,908,616,848,825,406,899,961,764,626,688,565,595,494	35645,8616,6205,35772,21828,21089,10268,24117,33927,2440,27985,26803,26917,23515,6824,14233,13746,9565	1306,368,362,362,305,317,144,143,163,265,224,204,224,184,409,224,211,211	13919,4258,4258,14046,9100,9100,4258,9100,14046,1354,9100,9100,9810,9810,4153,9434,12069,7471	0,0,0,0,0,277,0,0,0,0,0,0,0,0,0,0,0,0	10,8,6,10,10,6,9,11,9,5,9,9,8,7,6,7,5,6
ENSG00000237934.1_4	chr1	29550445	29551328	+	573	0	0	0	0	0	0	0	0	0	0	0	0	RP11-467D18.2	ENSG00000237934.1_4	1	ENST00000427046.1_1	3	570	313	331	201	0	-1
ENSG00000060656.19_3	chr1	29563028	29653325	+	6682	1197	1181	1898	1289	1303	1043	1423	8	55	2599	2952	2938	PTPRU	ENSG00000060656.19_3	11	ENST00000345512.7_3,ENST00000373779.7_3,ENST00000428026.6_3,ENST00000460170.2_3,ENST00000527027.1_1,ENST00000415600.6_1,ENST00000531385.1_1,ENST00000526080.1_1,ENST00000493601.5_1,ENST00000465525.6_1,ENST00000492954.1_1	31,30,30,31,3,14,4,3,5,5,4	4439,5549,5520,5306,616,1576,733,421,690,1645,621	84706,84735,84744,84724,14888,31579,19584,892,6848,4357,1811	308,1201,1214,1070,293,273,253,198,161,615,278	18558,18558,18558,18558,14545,11829,11829,793,2764,2546,1403	4310,4281,4272,4292,0,0,0,0,0,0,0	1,1,1,1,-1,-1,-1,-1,-1,-1,-1
ENSG00000221550.1	chr1	29580054	29580195	-	142	0	0	0	0	0	0	0	0	0	0	0	0	AL645859.1	ENSG00000221550.1	1	ENST00000408623.1	1	141	0	141	0	0	3
ENSG00000230523.1_3	chr1	29656132	29676626	-	2148	0	0	0	0	0	0	0	0	0	0	1	0	RP3-437I16.1	ENSG00000230523.1_3	1	ENST00000417651.1_1	3	2145	18349	1572	16375	0	5
ENSG00000266678.1	chr1	29758993	29759074	+	82	0	0	0	0	0	0	0	0	0	0	0	0	AL139151.1	ENSG00000266678.1	1	ENST00000580128.1	1	81	0	81	0	0	-1
ENSG00000225011.4_4	chr1	29814705	29823405	-	349	0	0	0	0	0	0	0	0	0	0	1	0	RP11-810H18.1	ENSG00000225011.4_4	1	ENST00000515851.1_1	2	347	8353	192	8353	0	4
ENSG00000221126.1	chr1	30117392	30117525	-	134	0	0	0	0	0	0	0	0	0	0	0	0	AC092265.1	ENSG00000221126.1	1	ENST00000408199.1	1	133	0	133	0	0	3
ENSG00000228176.1_4	chr1	30181698	30182394	-	498	0	0	0	0	0	0	0	0	0	1	0	0	RP4-656G21.1	ENSG00000228176.1_4	1	ENST00000422638.1_1	2	496	200	273	200	0	4
ENSG00000284676.1_2	chr1	30228022	30263444	+	1953	0	0	0	0	0	0	0	0	0	0	0	0	RP11-179G8.2	ENSG00000284676.1_2	1	ENST00000641702.1_1	5	1948	33474	1160	16414	0	-1
ENSG00000222787.1	chr1	30357749	30357852	+	104	0	0	0	0	0	0	0	0	0	0	0	0	AL645944.1	ENSG00000222787.1	1	ENST00000410855.1	1	103	0	103	0	0	-1
ENSG00000270927.1_4	chr1	30377712	30378204	-	493	0	0	0	0	0	0	0	0	0	0	0	0	RP11-179G8.1	ENSG00000270927.1_4	1	ENST00000603857.1_1	1	492	0	492	0	0	3
ENSG00000233399.2_3	chr1	30486799	30510459	-	1519	0	0	0	0	0	0	0	0	0	0	0	0	RP11-111I12.1	ENSG00000233399.2_3	1	ENST00000445180.2_1	7	1512	22148	557	8104	0	9
ENSG00000233372.1_4	chr1	30613110	30614454	+	551	0	0	0	0	0	0	0	0	0	0	0	0	RP5-893G23.1	ENSG00000233372.1_4	1	ENST00000441046.1_1	2	549	795	472	795	0	-1
ENSG00000231251.1_4	chr1	30699370	30699462	+	93	0	0	0	0	0	0	0	0	0	0	0	0	RP3-357I16.1	ENSG00000231251.1_4	1	ENST00000442774.1_1	1	92	0	92	0	0	-1
ENSG00000236335.1_4	chr1	30882407	30884485	-	507	0	0	0	0	0	0	0	0	0	0	0	0	RP4-591L5.1	ENSG00000236335.1_4	1	ENST00000427319.1_1	3	504	1574	185	1200	0	5
ENSG00000231949.1_4	chr1	30888672	30893955	+	481	0	0	0	0	0	0	0	0	0	0	0	0	RP4-591L5.2	ENSG00000231949.1_4	1	ENST00000420354.1_1	3	478	4805	324	3831	0	-1
ENSG00000162510.5_2	chr1	31184124	31196434	-	4606	2	1	2	2	2	3	1	0	0	1	3	2	MATN1	ENSG00000162510.5_2	3	ENST00000373765.4_1,ENST00000494561.1_1,ENST00000477320.1_1	8,3,3	3824,938,940	8486,1430,2285	2354,560,516	2448,830,1820	0,0,0	8,5,5
ENSG00000186056.9_4	chr1	31191351	31199674	+	4024	32	22	15	11	16	14	11	0	2	13	10	18	RP5-1166H10.2	ENSG00000186056.9_4	4	ENST00000414532.6_1,ENST00000454613.1_1,ENST00000414763.1_1,ENST00000443076.1_1	4,4,2,2	3921,2127,885,452	4319,5928,2056,192	2670,793,450,331	4013,4013,2056,192	0,0,0,0	-1,-1,-1,-1
ENSG00000162511.7_2	chr1	31205316	31230667	-	3274	25	24	14	12	14	10	7	0	1	40	37	32	LAPTM5	ENSG00000162511.7_2	3	ENST00000294507.3_1,ENST00000464569.1_1,ENST00000476492.1_1	8,8,2	2215,945,958	23136,11395,15110	1448,311,860	15110,3369,15110	0,0,0	8,10,4
ENSG00000264773.1	chr1	31212003	31212079	-	77	0	0	0	0	0	0	0	0	0	0	0	0	MIR4420	ENSG00000264773.1	1	ENST00000583944.1	1	76	0	76	0	0	3
ENSG00000229607.1_4	chr1	31283225	31288400	-	444	0	0	0	0	0	0	0	0	0	0	0	0	RP5-1125N11.1	ENSG00000229607.1_4	1	ENST00000440358.1_1	2	442	4733	336	4733	0	4
ENSG00000223382.4_3	chr1	31297075	31307278	+	1646	0	0	0	1	0	0	2	0	0	0	3	0	RP5-1125N11.2	ENSG00000223382.4_3	9	ENST00000430320.3_1,ENST00000635357.1_1,ENST00000635044.1_1,ENST00000635288.1_1,ENST00000634319.1_1,ENST00000635009.1_1,ENST00000634587.1_1,ENST00000634980.1_1,ENST00000438790.1_1	4,3,4,5,5,4,4,5,3	1104,805,944,1090,1083,1231,1168,1058,443	8952,8999,8861,8842,8889,8902,8481,8384,8615	778,596,597,724,764,925,770,596,227	3624,5375,3624,3624,3624,3624,3624,3624,7312	0,0,0,0,0,0,0,0,0	-1,-1,-1,-1,-1,-1,-1,-1,-1
ENSG00000222784.1	chr1	31316670	31316957	+	288	0	0	0	0	0	0	0	0	0	0	0	0	RN7SKP91	ENSG00000222784.1	1	ENST00000410852.1	1	287	0	287	0	0	-1
ENSG00000235143.1_4	chr1	31331005	31333101	+	1747	0	0	0	0	0	0	0	0	0	0	0	0	RP1-65J11.5	ENSG00000235143.1_4	1	ENST00000431202.1_1	2	1745	351	1537	351	0	-1
ENSG00000162512.15_4	chr1	31342314	31381608	-	7067	66	61	54	23	22	15	21	0	7	123	117	118	SDC3	ENSG00000162512.15_4	4	ENST00000336798.11_3,ENST00000339394.6_3,ENST00000471567.1_1,ENST00000487984.1_1	3,5,3,4	6389,1575,586,351	2884,34051,4076,1742	3910,613,398,167	1964,29709,2618,965	0,0,0,0	3,5,5,6
ENSG00000134644.15_3	chr1	31404353	31538838	-	6621	4440	5097	5993	4561	4816	4248	5644	8	22	4686	6112	6226	PUM1	ENSG00000134644.15_3	23	ENST00000424085.6_2,ENST00000257075.9_1,ENST00000373747.7_1,ENST00000525843.5_1,ENST00000426105.6_1,ENST00000498419.5_1,ENST00000440538.6_1,ENST00000373741.8_1,ENST00000373742.6_1,ENST00000530669.1_1,ENST00000529846.5_1,ENST00000525997.1_1,ENST00000527498.1_1,ENST00000498627.1_1,ENST00000471894.1_1,ENST00000490546.1_1,ENST00000532678.1_1,ENST00000526128.1_1,ENST00000526215.5_1,ENST00000525948.5_1…	18,22,22,21,22,17,22,22,20,5,6,6,5,2,4,5,6,4,5,7,7,3,2	4613,5338,5353,4507,4021,3051,3914,4220,3495,577,677,644,647,420,808,702,787,575,581,1096,899,558,547	129576,128854,128845,129160,128848,59164,128926,128921,129210,11490,16358,16376,18824,1072,8035,13284,27092,6921,83757,72158,69602,36379,2090	1836,1836,1836,1283,516,498,498,492,373,201,137,129,198,398,262,211,270,228,278,278,373,373,298	47391,30340,30340,30340,30340,10985,30340,30340,33576,4316,4644,8010,10856,1072,6159,6159,10985,5260,30435,30435,26449,30340,2090	0,0,0,1154,0,369,0,0,0,350,0,0,378,0,0,0,0,0,0,0,0,0,0	18,22,22,21,22,17,22,22,20,2,8,8,2,4,6,7,8,6,3,3,3,5,4
ENSG00000200154.1	chr1	31408535	31408620	-	86	6	5	7	3	6	5	7	0	0	7	6	5	SNORD103A	ENSG00000200154.1	1	ENST00000363284.1	1	85	0	85	0	0	3
ENSG00000202107.1	chr1	31421964	31422049	-	86	17	24	21	23	23	15	26	0	0	38	39	44	SNORD103B	ENSG00000202107.1	1	ENST00000365237.1	1	85	0	85	0	0	3
ENSG00000200181.1	chr1	31441011	31441083	-	73	21	19	31	18	22	13	11	0	0	24	18	18	SNORD85	ENSG00000200181.1	1	ENST00000363311.1	1	72	0	72	0	0	3
ENSG00000237329.2_4	chr1	31509581	31510087	+	507	0	0	0	0	0	0	0	0	0	0	0	0	RP11-201O14.1	ENSG00000237329.2_4	1	ENST00000417263.2_1	1	506	0	506	0	0	-1
ENSG00000232768.1_4	chr1	31523719	31523881	+	163	0	0	0	0	0	0	0	0	0	0	0	0	RP11-201O14.2	ENSG00000232768.1_4	1	ENST00000429616.1_2	1	162	0	162	0	0	-1
ENSG00000215900.4_3	chr1	31567834	31568405	-	252	0	0	0	0	0	0	0	0	0	0	0	0	SEPW1P	ENSG00000215900.4_3	1	ENST00000322792.5_1	2	250	321	173	321	0	4
ENSG00000225142.2_4	chr1	31581035	31581470	-	436	0	0	0	0	0	0	0	0	0	0	0	0	RP11-490K7.1	ENSG00000225142.2_4	1	ENST00000441274.2_1	1	435	0	435	0	0	3
ENSG00000084628.9_2	chr1	31652592	31712401	-	2987	4	11	5	8	2	2	2	0	1	1	0	2	NKAIN1	ENSG00000084628.9_2	5	ENST00000373736.6_1,ENST00000528449.1_1,ENST00000526106.5_1,ENST00000530145.1_1,ENST00000533581.1_1	7,2,5,5,2	2582,583,564,557,510	57227,553,6000,10812,2723	1967,437,197,197,346	51307,553,4036,5629,2723	0,0,116,0,0	7,4,5,7,4
ENSG00000060688.12_3	chr1	31732415	31769629	-	3881	2033	2567	3557	3342	2062	2152	2295	4	10	1629	2879	2974	SNRNP40	ENSG00000060688.12_3	7	ENST00000263694.8_1,ENST00000486941.1_1,ENST00000489853.1_1,ENST00000373720.3_1,ENST00000491106.1_1,ENST00000474025.1_1,ENST00000463988.1_1	10,2,6,4,2,3,2	1587,741,1922,1083,457,578,675	35615,1408,20887,8873,834,17633,3263	553,448,1109,508,335,291,504	9875,1408,9875,6239,834,9875,3263	0,0,0,0,0,0,0	10,4,8,4,4,5,4
ENSG00000229447.2_4	chr1	31736092	31736528	-	437	13	20	28	18	30	18	15	0	0	15	27	15	RP11-490K7.4	ENSG00000229447.2_4	1	ENST00000452686.2_1	1	436	0	436	0	0	3
ENSG00000121766.15_4	chr1	31769829	31837800	+	1921	743	1109	1247	1153	1165	1120	960	3	4	688	1075	1021	ZCCHC17	ENSG00000121766.15_4	9	ENST00000618216.4_1,ENST00000546109.5_2,ENST00000616393.4_1,ENST00000616859.4_1,ENST00000615916.4_1,ENST00000344147.9_2,ENST00000479629.5_1,ENST00000373714.5_2,ENST00000627541.1_1	7,9,7,7,7,8,8,8,7	1482,1696,1527,1451,1645,1597,753,1722,1151	66489,66275,66444,66520,66326,66344,51217,66206,66365	921,921,921,921,921,904,139,904,520	18009,18009,19791,24984,21896,18009,18009,18009,22013	435,695,535,478,785,719,0,719,726	2,3,3,3,1,2,-1,2,2
ENSG00000229044.1_4	chr1	31805914	31819646	-	439	0	0	2	1	1	1	0	0	0	1	2	0	RP11-266K22.2	ENSG00000229044.1_4	1	ENST00000430143.1_1	3	436	13296	221	9376	0	5
ENSG00000121769.7_3	chr1	31838472	31849697	-	1026	27	33	1	2	1	6	5	0	0	36	74	96	FABP3	ENSG00000121769.7_3	4	ENST00000373713.6_2,ENST00000497275.5_1,ENST00000498148.5_1,ENST00000482018.1_3	4,3,5,6	721,532,688,619	6730,3345,6664,10340	314,226,218,172	3385,1891,3385,3385	0,0,0,0	4,5,3,8
ENSG00000168528.11_3	chr1	31882412	31907527	+	3549	487	437	210	130	343	242	311	1	3	258	293	295	SERINC2	ENSG00000168528.11_3	6	ENST00000373710.5_2,ENST00000536859.5_2,ENST00000487207.5_1,ENST00000373709.7_2,ENST00000491976.1_1,ENST00000536384.2_2	11,10,5,10,11,10	2135,2062,730,1987,2796,2052	22977,22444,14911,19575,18068,18815	613,616,218,614,964,616	13258,13258,13258,10389,7786,9629	1384,1370,0,1358,0,1370	1,1,-1,1,-1,1
ENSG00000268950.1	chr1	31902192	31902614	-	423	0	0	0	0	0	0	0	0	0	0	0	0	AC114494.1	ENSG00000268950.1	1	ENST00000596131.1	1	422	0	422	0	-418	1
ENSG00000215899.3_4	chr1	31960436	31961777	-	1342	0	0	0	0	0	0	1	0	0	0	0	0	RP11-439L8.2	ENSG00000215899.3_4	1	ENST00000401075.3_1	1	1341	0	1341	0	0	3
ENSG00000206981.1	chr1	31970419	31970525	-	107	0	0	0	0	0	0	0	0	0	0	0	0	RNU6-40P	ENSG00000206981.1	1	ENST00000384254.1	1	106	0	106	0	0	3
ENSG00000284543.1_2	chr1	31971827	32048907	+	9848	167	159	63	49	90	95	121	2	3	91	157	161	RP11-73M7.10	ENSG00000284543.1_2	9	ENST00000639839.1_1,ENST00000640226.1_1,ENST00000639741.1_1,ENST00000640157.1_1,ENST00000640623.1_1,ENST00000638644.1_1,ENST00000640630.1_1,ENST00000639946.1_1,ENST00000639047.1_1	5,4,3,3,3,5,2,3,1	549,547,505,571,5016,536,1120,351,3606	76472,76484,33877,15502,3072,45538,106,2374,0	180,157,294,333,4419,137,758,192,3606	42264,31492,29863,14540,2110,15603,106,1485,0	0,0,0,0,0,0,0,0,0	-1,-1,-1,-1,-1,-1,-1,-1,-1
ENSG00000228682.2	chr1	31971841	31974167	+	1166	1	3	1	0	0	0	1	0	0	6	0	1	RP11-439L8.3	ENSG00000228682.2	1	ENST00000418618.1	3	1163	1163	850	1028	0	-1
ENSG00000229167.1_4	chr1	32037186	32041174	-	591	31	53	24	18	5	5	57	0	0	49	63	76	RP11-73M7.1	ENSG00000229167.1_4	1	ENST00000435872.1_1	3	588	3400	268	3107	0	5
ENSG00000142910.15_2	chr1	32042086	32053287	+	5281	688	689	334	255	510	440	698	3	28	409	731	726	TINAGL1	ENSG00000142910.15_2	11	ENST00000457433.6_1,ENST00000271064.11_1,ENST00000461030.5_1,ENST00000466998.1_1,ENST00000478398.5_1,ENST00000481165.5_1,ENST00000468635.5_1,ENST00000537531.2_1,ENST00000498429.5_1,ENST00000463112.1_1,ENST00000480586.1_1	11,12,5,2,7,6,8,11,8,5,3	2129,2175,815,678,758,4753,819,1830,896,3070,923	9068,8976,7679,539,8014,5897,6521,7707,5227,1103,368	843,847,426,628,189,1652,189,843,189,1288,689	4194,3882,3882,539,3882,3882,3882,3882,3336,834,268	1301,1393,0,0,0,0,0,1079,0,0,0	2,2,-1,-1,-1,-1,-1,2,-1,-1,-1
ENSG00000121764.11_2	chr1	32083287	32098119	+	2558	2	1	0	0	0	0	0	0	0	1	0	0	HCRTR1	ENSG00000121764.11_2	5	ENST00000485464.5_1,ENST00000468521.1_1,ENST00000403528.6_1,ENST00000373706.9_1,ENST00000373705.1_1	6,9,8,7,7	940,1695,1995,1635,1163	5123,8232,7623,6516,12162	243,340,528,401,243	2027,2205,1931,1931,7318	0,0,1271,1271,1163	-1,-1,2,1,1
ENSG00000162517.12_2	chr1	32095463	32110497	-	2227	1245	1562	1558	1431	1334	1335	1317	5	1	639	1078	1075	PEF1	ENSG00000162517.12_2	8	ENST00000373703.4_1,ENST00000461006.5_1,ENST00000478502.5_1,ENST00000489164.5_1,ENST00000492061.5_1,ENST00000496805.5_1,ENST00000472443.1_1,ENST00000471219.1_1	5,4,4,5,3,3,3,3	1624,728,746,860,933,739,684,398	13401,4192,13701,12940,10509,10576,10648,1799	980,392,393,300,478,365,334,250	9319,1908,11527,8858,8601,8668,8740,1520	0,0,0,0,0,0,0,0	5,6,6,7,5,5,5,5
ENSG00000235790.7_5	chr1	32109650	32125763	+	2216	5	6	2	4	2	1	4	0	0	6	4	13	RP11-73M7.6	ENSG00000235790.7_5	24	ENST00000623791.3_2,ENST00000610043.5_2,ENST00000609625.5_2,ENST00000609549.5_2,ENST00000608332.5_2,ENST00000623425.3_2,ENST00000585660.5_1,ENST00000591592.5_1,ENST00000608246.5_2,ENST00000608888.5_2,ENST00000610216.5_2,ENST00000607926.5_2,ENST00000585413.5_1,ENST00000609033.5_2,ENST00000589462.5_3,ENST00000624388.3_2,ENST00000593188.5_1,ENST00000609373.5_2,ENST00000587445.5_3,ENST00000591929.5_3…	5,6,4,4,4,5,5,4,4,4,5,5,5,5,5,4,4,5,5,6,4,2,3,2	690,894,756,825,595,662,695,574,682,619,690,742,840,808,786,606,672,688,709,866,569,360,725,509	15007,14833,15099,15030,14549,14413,14098,14231,14205,14249,14165,14113,13836,13780,13877,14010,13969,13880,13921,13743,14013,3469,3305,2162	247,247,247,247,206,250,164,164,250,206,206,250,275,233,272,250,275,166,228,274,206,284,508,275	7553,7553,7553,7553,7003,7003,6729,6729,6703,6703,6711,6703,6467,6467,6467,6508,6467,6467,6467,6467,6467,3469,2593,2162	0,0,0,0,0,0,0,0,0,0,0,0,0,0,0,0,0,0,0,0,0,0,0,0	-1,-1,-1,-1,-1,-1,-1,-1,-1,-1,-1,-1,-1,-1,-1,-1,-1,-1,-1,-1,-1,-1,-1,-1
ENSG00000264078.1_5	chr1	32110295	32114972	+	480	2	2	1	0	0	2	0	0	1	2	0	5	RP11-73M7.9	ENSG00000264078.1_5	1	ENST00000581333.1_1	2	478	4199	326	4199	0	-1
ENSG00000084636.17_3	chr1	32117848	32169920	-	9269	153	103	192	117	292	317	804	0	27	147	210	206	COL16A1	ENSG00000084636.17_3	17	ENST00000373672.7_1,ENST00000488128.6_1,ENST00000488897.5_1,ENST00000461217.1_1,ENST00000440437.1_1,ENST00000466829.5_1,ENST00000470799.5_1,ENST00000482910.1_1,ENST00000468459.5_1,ENST00000479100.1_1,ENST00000458715.5_1,ENST00000373668.7_1,ENST00000474000.5_1,ENST00000482478.5_1,ENST00000529928.1_1,ENST00000373667.4_1,ENST00000532877.1_1	71,23,15,4,13,4,10,10,9,9,13,41,11,11,7,17,4	5665,2831,2408,848,659,250,816,666,611,731,693,3602,665,786,574,907,530	46407,15260,8460,1396,9022,925,4984,4905,6504,4913,10625,21487,5128,4671,3712,7242,5040	606,791,869,534,89,100,348,122,121,202,116,482,131,131,227,110,223	4321,2514,1621,749,2785,428,2514,2514,2760,1701,4321,2188,2188,2188,2188,2032,3722	0,0,0,0,0,0,0,0,0,0,0,0,0,0,0,0,0	71,25,17,6,15,6,12,12,11,11,15,41,13,13,9,19,6
ENSG00000121753.12_3	chr1	32192718	32230494	-	7756	0	2	1	2	4	1	3	0	0	12	4	4	ADGRB2	ENSG00000121753.12_3	15	ENST00000398556.7_2,ENST00000398547.5_2,ENST00000373655.6_2,ENST00000398542.5_1,ENST00000465256.5_1,ENST00000373658.7_2,ENST00000530999.1_1,ENST00000527361.5_2,ENST00000398538.5_2,ENST00000466109.1_1,ENST00000420125.5_3,ENST00000530134.5_1,ENST00000533175.1_2,ENST00000468430.1_1,ENST00000436464.1_2	29,29,33,28,10,33,9,30,29,3,14,8,6,3,3	4850,4828,5367,5148,2926,5381,1709,4889,4646,547,2527,1172,1607,487,536	27456,31977,31551,32075,6635,31548,6468,25175,24744,463,16043,15577,21486,1078,3273	816,816,816,816,963,816,619,816,802,378,816,265,816,214,343	11268,11268,11268,11268,2167,11268,2167,11268,11268,261,11268,11268,11268,621,3172	0,0,0,0,0,0,0,0,0,0,0,0,0,0,0	29,29,33,28,12,33,11,30,29,5,16,10,8,5,5
ENSG00000266580.1	chr1	32224261	32224336	-	76	0	0	0	0	0	0	0	0	0	0	0	0	MIR4254	ENSG00000266580.1	1	ENST00000581063.1	1	75	0	75	0	0	3
ENSG00000254545.1_4	chr1	32254731	32256923	+	537	0	0	0	0	0	0	0	0	0	0	0	0	RP11-84A19.3	ENSG00000254545.1_4	1	ENST00000527035.1_1	2	535	1657	354	1657	0	-1
ENSG00000134668.12_4	chr1	32256023	32281652	-	7085	6	4	3	3	4	10	4	0	2	11	5	5	SPOCD1	ENSG00000134668.12_4	14	ENST00000257100.7_1,ENST00000360482.6_1,ENST00000473361.5_1,ENST00000452755.6_3,ENST00000533231.5_1,ENST00000528579.1_1,ENST00000532604.5_1,ENST00000531039.5_1,ENST00000468720.5_1,ENST00000460061.5_1,ENST00000485944.5_1,ENST00000529396.1_1,ENST00000528791.5_1,ENST00000525930.1_1	15,16,6,9,15,5,3,6,3,2,7,5,6,3	2457,3944,1932,2096,3759,760,522,575,2664,2623,2872,558,481,474	23143,21683,6255,6266,21133,4637,4091,5090,1611,1492,16741,16042,15732,15086	830,1421,824,775,1424,274,217,159,2219,2199,2199,258,176,276	14256,12246,3972,2358,12246,3972,3972,2355,1492,1492,12246,14042,13643,14039	0,0,0,0,0,0,0,0,0,0,0,0,0,0	15,16,8,9,15,7,5,8,5,4,9,7,8,5
ENSG00000203620.2_5	chr1	32307620	32321169	-	2257	0	0	0	0	0	0	2	0	1	1	0	0	RP11-84A19.2	ENSG00000203620.2_5	1	ENST00000453837.1_1	2	2255	11294	2128	11294	0	4
ENSG00000269967.1_5	chr1	32317514	32387442	-	587	25	17	28	24	25	35	28	0	3	42	39	43	RP11-84A19.4	ENSG00000269967.1_5	1	ENST00000602889.1_1	2	585	69343	484	69343	0	4
ENSG00000184007.19_4	chr1	32372022	32410457	-	6423	3315	4571	4048	3873	3916	3930	3680	5	33	2575	3557	3392	PTP4A2	ENSG00000184007.19_4	21	ENST00000602725.5_1,ENST00000647444.1_1,ENST00000457805.6_1,ENST00000489313.1_1,ENST00000602683.5_2,ENST00000470404.5_1,ENST00000532001.6_1,ENST00000528253.3_1,ENST00000627328.2_1,ENST00000626355.1_1,ENST00000484483.1_1,ENST00000468531.1_1,ENST00000534796.5_1,ENST00000532289.1_1,ENST00000526960.1_1,ENST00000524384.5_1,ENST00000528840.1_1,ENST00000494444.2_1,ENST00000529477.5_1,ENST00000533408.1_1…	5,6,4,2,4,4,7,5,3,3,2,3,3,2,2,3,2,3,3,3,5	3348,3915,1028,1549,663,571,904,801,612,603,649,827,897,608,791,660,454,675,565,373,361	9714,28043,9806,1078,9788,9844,9616,8594,5855,5035,2983,25854,17888,18184,24935,17911,18120,18120,18533,18389,17852	2539,2539,426,1242,302,252,389,494,500,500,447,688,658,564,528,429,414,411,398,234,147	4069,18329,7144,1078,4069,5783,2983,2983,2983,2983,2983,22871,11275,18184,24935,11275,18120,11275,18329,18329,8507	0,0,0,0,0,0,0,0,0,0,0,0,0,0,0,0,0,0,0,0,0	5,6,4,4,4,3,3,3,3,3,4,5,5,4,4,5,4,5,5,5,7
ENSG00000212673.1	chr1	32379174	32380745	+	1572	0	0	0	0	0	0	0	0	0	0	0	0	AL136115.1	ENSG00000212673.1	1	ENST00000391369.1	1	1571	0	1571	0	317	1
ENSG00000228634.1_4	chr1	32398621	32399576	+	517	0	0	0	0	0	0	0	0	0	0	0	0	RP4-534N18.2	ENSG00000228634.1_4	1	ENST00000447478.1_1	2	515	440	325	440	0	-1
ENSG00000284702.1_2	chr1	32437790	32452635	-	1873	0	0	0	0	0	0	0	0	0	0	0	0	RP4-534N18.4	ENSG00000284702.1_2	1	ENST00000641788.1_1	2	1871	12974	1689	12974	0	4
ENSG00000121774.17_2	chr1	32479430	32526451	+	3588	2417	2632	3667	2902	2428	2221	2907	5	43	3604	3759	3695	KHDRBS1	ENSG00000121774.17_2	4	ENST00000327300.11_1,ENST00000307714.12_1,ENST00000492989.1_1,ENST00000484270.2_1	9,9,8,11	2748,2729,1207,1978	27305,27222,27421,44690	1355,1350,381,687	15921,15921,15921,15921	1323,0,1207,0	1,-1,1,-1
ENSG00000203325.3_4	chr1	32517892	32539075	-	624	0	1	0	0	1	0	0	0	1	1	2	1	RP11-277A4.4	ENSG00000203325.3_4	1	ENST00000366152.3_1	3	621	20562	441	18823	0	5
ENSG00000121775.17_2	chr1	32537632	32568467	+	2820	190	159	193	150	168	143	165	0	14	190	205	228	TMEM39B	ENSG00000121775.17_2	9	ENST00000487305.5_1,ENST00000336294.9_1,ENST00000438825.5_1,ENST00000441402.5_1,ENST00000472503.5_1,ENST00000468135.5_1,ENST00000466321.5_1,ENST00000476968.5_1,ENST00000498613.1_1	9,9,5,7,6,10,6,11,5	2078,1804,685,1531,944,1824,764,1983,849	28754,28155,18125,28392,18106,28073,17995,27717,17957	432,430,219,435,334,435,219,435,336	14357,14357,14357,15853,14357,14357,14357,14357,14357	0,1470,0,578,0,0,0,0,0	-1,1,1,1,-1,-1,-1,-1,-1
ENSG00000266203.1	chr1	32552550	32552608	+	59	3	0	1	1	0	1	0	0	3	1	2	3	MIR5585	ENSG00000266203.1	1	ENST00000577515.1	1	58	0	58	0	0	-1
ENSG00000025800.13_3	chr1	32573639	32642169	+	7480	3540	3943	4724	3850	4788	4439	4299	10	126	4296	5557	5478	KPNA6	ENSG00000025800.13_3	4	ENST00000373625.7_1,ENST00000471599.5_1,ENST00000469790.1_1,ENST00000446515.1_1	14,14,9,9	7364,3927,870,956	61166,61188,18601,9478	5861,2466,133,163	46454,46454,11564,2792	1597,554,0,0	1,1,-1,-1
ENSG00000250135.1_5	chr1	32636334	32642169	+	667	523	653	704	624	775	759	686	4	4	753	887	869	RP4-622L5.2	ENSG00000250135.1_5	1	ENST00000515055.1_1	2	665	5170	473	5170	0	-1
ENSG00000084652.15_2	chr1	32645287	32663886	+	5103	4222	4783	5709	4569	4826	4552	4284	8	63	5902	6963	7410	TXLNA	ENSG00000084652.15_2	2	ENST00000373610.7_1,ENST00000373609.1_1	11,10	4843,5002	13756,13218	3383,3383	3338,3338	1631,1631	2,1
ENSG00000160050.14_2	chr1	32665987	32670988	+	2818	22	43	35	32	46	55	52	0	4	89	85	73	CCDC28B	ENSG00000160050.14_2	5	ENST00000373602.9_1,ENST00000469003.5_1,ENST00000421922.6_1,ENST00000461819.5_1,ENST00000483009.1_1	6,3,5,6,4	1083,1232,1410,774,611	3918,1326,3344,3965,2907	323,938,789,189,403	1780,1204,1780,1780,1780	598,250,722,387,0	2,2,2,2,-1
ENSG00000224066.1_4	chr1	32670370	32672415	-	1357	9	5	22	11	10	16	27	0	1	41	16	23	RP4-622L5.7	ENSG00000224066.1_4	2	ENST00000373604.4_1,ENST00000421616.1_1	2,4	640,782	776,534	570,260	776,357	0,0	4,6
ENSG00000160051.11_3	chr1	32671262	32674288	+	2478	117	122	169	143	105	118	104	1	17	135	179	156	IQCC	ENSG00000160051.11_3	3	ENST00000291358.10_3,ENST00000617816.1_1,ENST00000537469.2_3	5,4,5	2022,2085,2247	1004,792,764	1447,1308,1442	431,431,241	1396,0,1636	1,-1,1
ENSG00000222046.2_2	chr1	32674695	32681797	+	1869	2	3	0	2	1	0	1	0	1	0	1	3	DCDC2B	ENSG00000222046.2_2	2	ENST00000409358.1_1,ENST00000487056.1_1	9,7	1340,1856	5762,5240	394,875	2004,2004	1041,0	1,-1
ENSG00000160055.19_2	chr1	32680073	32687960	-	3571	218	265	277	191	259	266	224	0	5	313	288	335	TMEM234	ENSG00000160055.19_2	12	ENST00000466796.1_1,ENST00000495091.5_1,ENST00000491434.5_1,ENST00000489170.5_1,ENST00000461402.5_1,ENST00000483001.5_1,ENST00000309777.10_1,ENST00000373593.5_1,ENST00000344461.7_1,ENST00000484490.1_1,ENST00000485689.1_1,ENST00000487174.1_1	4,2,11,10,9,7,5,4,6,3,2,5	2732,377,1527,1402,1857,962,1077,1407,715,734,520,967	3992,941,6329,6469,6012,5526,5051,4739,5423,5268,318,4622	1678,255,572,572,659,434,750,1154,317,590,352,452	3780,941,3554,3780,3780,3780,3780,3780,3780,4956,318,3554	0,0,0,0,0,0,0,0,0,0,0,0	6,4,4,6,6,6,5,4,6,3,4,7
ENSG00000084623.11_2	chr1	32687529	32697205	+	1725	2830	3884	5093	4959	5068	5153	3724	9	1156	3359	5018	4893	EIF3I	ENSG00000084623.11_2	6	ENST00000355082.9_1,ENST00000373586.1_1,ENST00000489353.5_1,ENST00000471486.5_1,ENST00000483517.5_1,ENST00000474371.1_1	6,11,6,7,6,7	558,1447,521,818,738,636	3809,7787,3544,5559,6030,7873	124,489,171,193,190,127	1696,1969,1674,1969,3541,4024	0,967,0,0,0,0	2,1,-1,-1,-1,-1
ENSG00000220785.7_3	chr1	32697259	32707221	-	2961	54	53	63	32	51	45	80	0	41	197	136	148	MTMR9L	ENSG00000220785.7_3	4	ENST00000423995.5_1,ENST00000403496.6_1,ENST00000441044.5_1,ENST00000426597.2_1	6,4,9,10	1872,1165,2615,1535	7260,7597,7345,8210	921,553,795,220	4085,4756,4182,4778	0,0,0,0	8,6,11,12
ENSG00000183615.5_2	chr1	32712834	32714457	+	936	10	9	2	3	7	2	6	0	1	23	17	18	FAM167B	ENSG00000183615.5_2	1	ENST00000373582.3_1	2	934	689	485	689	490	1
ENSG00000182866.16_2	chr1	32716840	32751766	+	3339	224	244	18	13	8	6	5	0	27	465	115	97	LCK	ENSG00000182866.16_2	14	ENST00000373564.7_1,ENST00000336890.9_1,ENST00000482949.5_1,ENST00000495610.6_1,ENST00000355928.7_1,ENST00000476457.5_1,ENST00000469765.5_1,ENST00000619559.4_1,ENST00000461712.6_1,ENST00000373562.7_1,ENST00000477031.6_1,ENST00000373557.6_1,ENST00000333070.4_1,ENST00000469956.1_1	11,13,5,10,3,4,12,13,3,6,2,7,13,4	2126,2104,709,1050,723,716,2114,2086,563,545,578,925,2153,919	32799,32822,23645,27585,23257,23432,32728,9967,402,944,303,1382,9877,634	650,651,346,179,518,453,646,650,341,130,313,313,648,566	22954,22954,22954,22954,22954,22954,22954,5304,303,303,303,303,5304,274	1541,1518,0,0,0,0,0,1518,0,0,0,0,1608,0	2,2,2,2,-1,-1,-1,2,2,2,1,1,2,-1
ENSG00000252450.1	chr1	32752053	32752162	-	110	0	0	0	0	0	0	0	0	0	0	0	0	Y_RNA	ENSG00000252450.1	1	ENST00000516641.1	1	109	0	109	0	0	3
ENSG00000116478.11_3	chr1	32757687	32799236	+	3963	3081	3664	3758	3141	2581	2670	2691	9	61	3023	4449	4280	HDAC1	ENSG00000116478.11_3	10	ENST00000373548.7_1,ENST00000481281.5_1,ENST00000463172.5_1,ENST00000428704.1_2,ENST00000472928.5_1,ENST00000490081.5_1,ENST00000482310.5_1,ENST00000476391.5_1,ENST00000484305.1_1,ENST00000471488.1_1	14,7,5,6,5,6,6,7,3,4	2110,714,890,658,527,1041,773,2402,558,722	39439,34825,34418,36342,34989,3551,3535,1753,168,821	618,138,506,141,141,488,184,1206,428,566	13932,13932,13932,13932,24447,1418,1418,566,86,459	1435,0,0,0,0,0,0,0,0,0	1,-1,-1,1,-1,-1,-1,-1,-1,-1
ENSG00000175130.6_2	chr1	32799433	32801980	-	1699	3820	5294	4796	3660	2312	1967	3530	10	112	3739	5667	6147	MARCKSL1	ENSG00000175130.6_2	1	ENST00000329421.7_1	2	1697	850	1265	850	0	2
ENSG00000233775.1_4	chr1	32814795	32816264	-	687	54	40	39	19	18	15	15	0	1	35	50	71	RP4-811H24.9	ENSG00000233775.1_4	1	ENST00000448134.1_1	2	685	784	627	784	0	4
ENSG00000162526.6_2	chr1	32817122	32829913	+	2191	43	26	40	35	31	40	35	0	11	45	54	59	TSSK3	ENSG00000162526.6_2	4	ENST00000421153.2_1,ENST00000574792.1_1,ENST00000574315.1_1,ENST00000373534.3_1	3,2,2,2	263,713,271,1366	1757,654,10054,749	90,640,184,717	1103,654,10054,749	0,0,0,805	-1,-1,2,1
ENSG00000225828.1_4	chr1	32826871	32829879	-	2845	139	90	142	86	139	145	166	0	4	245	243	218	FAM229A	ENSG00000225828.1_4	4	ENST00000432622.1_2,ENST00000416512.1_1,ENST00000428500.1_4,ENST00000415596.1_1	3,2,2,3	696,2757,360,443	277,195,166,2106	285,2493,266,203	195,195,166,2024	0,0,205,0	3,4,2,5
ENSG00000160058.18_2	chr1	32830704	32860332	-	6271	2382	2587	1856	1577	2956	2791	1561	3	71	3263	3835	3735	BSDC1	ENSG00000160058.18_2	16	ENST00000455895.6_1,ENST00000444377.5_1,ENST00000341071.11_1,ENST00000526031.5_1,ENST00000419121.6_1,ENST00000446293.6_1,ENST00000463967.1_1,ENST00000373520.8_1,ENST00000527513.5_1,ENST00000527163.5_1,ENST00000530485.1_1,ENST00000474414.5_1,ENST00000530876.5_1,ENST00000530753.1_1,ENST00000533084.1_1,ENST00000531222.1_1	11,12,10,9,10,11,2,10,7,8,6,5,3,3,3,2	2835,2913,4589,1352,1463,1494,614,1620,569,559,476,973,567,568,561,560	26510,26402,24666,26793,26677,26459,6143,24775,17226,17179,15725,14995,9967,9916,7449,264	1551,1541,3379,479,479,479,525,517,116,115,167,651,351,345,474,539	7712,7185,7712,12812,7712,7712,6143,7712,7940,10141,10083,7185,7185,7185,7185,264	0,0,0,0,0,0,0,0,0,0,0,0,0,0,0,0	11,11,10,9,10,11,4,4,4,10,8,7,5,5,5,4
ENSG00000224333.1_3	chr1	32867710	32868716	-	1007	0	0	0	0	0	0	0	0	0	0	0	1	RP11-395N6.1	ENSG00000224333.1_3	1	ENST00000444107.1_1	1	1006	0	1006	0	0	3
ENSG00000270850.1_4	chr1	32887580	32887920	+	341	0	0	0	0	0	0	0	0	0	1	0	0	RP11-395N6.4	ENSG00000270850.1_4	1	ENST00000604085.1_1	1	340	0	340	0	0	-1
ENSG00000229259.1_3	chr1	32888815	32892390	-	1801	0	0	0	0	0	0	0	0	0	0	0	0	RP11-395N6.2	ENSG00000229259.1_3	1	ENST00000454917.1_1	4	1797	1778	783	826	0	6
ENSG00000263529.1	chr1	32923436	32923733	+	298	0	0	0	0	0	1	0	0	0	2	0	1	RN7SL122P	ENSG00000263529.1	1	ENST00000579362.1	1	297	0	297	0	0	-1
ENSG00000254553.1_5	chr1	32930658	33066393	+	3447	154	137	197	151	109	110	177	1	1	247	300	287	RP1-27O5.3	ENSG00000254553.1_5	1	ENST00000480336.1_1	10	3437	132298	1031	50781	1534	2
ENSG00000273274.1_3	chr1	32930670	32962287	+	12834	7	3	4	4	6	3	10	1	19	15	21	31	ZBTB8B	ENSG00000273274.1_3	1	ENST00000609129.1_1	4	12830	18787	11585	9276	1485	2
ENSG00000160062.14_3	chr1	33005028	33071540	+	7075	282	232	341	260	184	200	332	2	450	414	528	484	ZBTB8A	ENSG00000160062.14_3	2	ENST00000373510.8_1,ENST00000316459.4_1	5,5	7070,1938	59442,59623	5852,823	39391,39391	1323,1020	3,3
ENSG00000176261.15_4	chr1	33065773	33116504	-	3531	889	941	901	851	860	873	829	3	627	697	914	922	ZBTB8OS	ENSG00000176261.15_4	15	ENST00000341885.5_1,ENST00000468695.5_1,ENST00000492007.5_1,ENST00000373506.7_1,ENST00000467652.5_1,ENST00000498691.5_2,ENST00000373501.6_2,ENST00000473294.6_1,ENST00000436661.5_2,ENST00000476493.5_2,ENST00000465588.2_1,ENST00000483138.5_1,ENST00000479075.5_1,ENST00000473383.1_1,ENST00000466361.1_1	2,7,4,6,3,6,7,7,6,7,6,6,4,3,2	310,1594,813,760,385,535,591,613,508,581,542,674,765,705,536	50083,28170,28425,28190,9843,11696,28104,28092,28222,28128,28125,22289,18313,1990,15641	178,1128,637,344,231,137,121,159,127,159,159,293,470,571,434	50083,15641,15641,16357,5560,5560,15641,15641,15641,15637,16292,15641,16323,1766,15641	0,0,553,260,0,322,0,381,74,415,0,0,0,0,0	2,7,4,6,5,3,7,3,6,3,6,8,2,5,4
ENSG00000200591.1	chr1	33105552	33105653	+	102	0	0	0	0	0	0	0	0	0	0	0	0	Y_RNA	ENSG00000200591.1	1	ENST00000363721.1	1	101	0	101	0	0	-1
ENSG00000162521.18_4	chr1	33116743	33151812	+	9470	6425	7923	8154	6641	4828	4603	6715	15	1079	4913	7370	7360	RBBP4	ENSG00000162521.18_4	19	ENST00000414241.7_1,ENST00000373493.9_1,ENST00000527118.5_1,ENST00000401893.7_1,ENST00000524393.5_1,ENST00000526193.5_1,ENST00000492348.6_1,ENST00000525506.1_1,ENST00000465780.1_1,ENST00000373485.5_3,ENST00000477563.6_1,ENST00000458695.6_1,ENST00000490500.5_3,ENST00000445722.2_3,ENST00000475321.5_1,ENST00000531983.1_1,ENST00000463378.5_2,ENST00000460669.5_2,ENST00000482190.1_2	12,12,5,4,5,5,10,3,2,12,5,12,3,4,7,3,8,8,7	1776,7931,695,758,578,563,1537,498,688,1405,539,1662,629,576,612,470,874,775,609	27135,27132,17215,16611,17310,17487,27450,5958,592,28018,16520,27022,5458,16218,3970,217,9941,10771,10786	413,6571,173,354,147,160,564,247,592,173,147,400,337,228,126,285,268,177,125	10653,10653,16164,10653,16259,16678,16678,5366,592,10653,5888,10653,5366,10653,2887,118,6060,6739,6734	1263,1266,186,0,0,261,261,0,0,1221,311,1162,0,0,0,0,780,536,497	1,1,1,-1,-1,1,1,-1,-1,1,1,2,2,2,-1,-1,-1,-1,-1
ENSG00000162520.14_3	chr1	33145961	33169197	-	3487	230	262	306	333	270	304	392	0	8	324	461	476	SYNC	ENSG00000162520.14_3	4	ENST00000409190.7_1,ENST00000373484.4_1,ENST00000417633.1_2,ENST00000426909.1_2	5,4,2,2	3393,1820,567,550	19366,19445,7464,6906	1500,1179,479,421	10483,10483,7464,6906	0,0,0,0	5,4,4,4
ENSG00000224409.1_4	chr1	33183335	33190838	-	395	1	0	0	0	4	1	0	0	0	2	0	1	RP11-114B7.6	ENSG00000224409.1_4	1	ENST00000421619.1_1	2	393	7110	234	7110	0	4
ENSG00000162522.10_2	chr1	33207486	33240571	+	5965	736	506	674	297	838	581	1007	2	17	1287	785	816	KIAA1522	ENSG00000162522.10_2	5	ENST00000401073.6_1,ENST00000468130.1_1,ENST00000373481.7_1,ENST00000294521.7_1,ENST00000373480.1_1	7,4,7,5,7	5431,680,5286,873,5287	27654,14247,15663,6690,4016	2561,294,2561,332,2561	25598,13607,13607,4090,1960	3278,0,3134,427,3101	1,-1,1,1,1
ENSG00000134684.10_2	chr1	33240838	33283754	-	8212	3240	4102	3921	2463	3431	2301	1957	8	189	4244	4551	4517	YARS	ENSG00000134684.10_2	10	ENST00000469100.5_1,ENST00000373477.8_1,ENST00000490826.1_1,ENST00000487404.5_1,ENST00000478828.1_1,ENST00000616261.1_1,ENST00000481895.5_1,ENST00000466052.1_1,ENST00000470377.1_1,ENST00000472692.1_1	4,13,2,5,6,12,9,4,3,2	2243,3225,2176,2192,1038,1155,1009,724,779,771	4623,39689,3291,5882,9705,35838,29938,10550,15148,145	1055,965,1329,1351,372,175,175,451,601,736	3291,8639,3291,3291,3823,8639,8639,6338,8639,145	0,0,0,0,0,0,0,0,0,0	6,13,4,7,8,12,11,6,5,4
ENSG00000116497.17_3	chr1	33282368	33324480	+	9194	957	997	1293	1118	1072	949	1196	4	813	1756	1831	1782	S100PBP	ENSG00000116497.17_3	16	ENST00000530710.5_3,ENST00000373476.5_1,ENST00000373475.9_1,ENST00000529027.5_1,ENST00000531123.5_1,ENST00000356689.7_1,ENST00000526230.1_1,ENST00000531256.1_1,ENST00000477248.1_1,ENST00000482212.1_3,ENST00000474103.1_1,ENST00000530552.1_3,ENST00000525203.5_1,ENST00000524535.5_1,ENST00000527692.1_1,ENST00000475486.1_1	3,7,7,4,7,7,3,2,2,3,2,2,4,3,3,2	722,3313,4315,425,1681,3576,570,549,343,703,415,549,242,528,548,663	9000,37099,37009,8241,23931,16010,8237,8409,836,8136,679,669,8912,8115,2877,2758	391,1930,2955,132,832,2313,362,515,310,440,307,532,87,407,250,402	8331,23012,23012,4714,8722,7624,7624,8409,836,7467,679,669,5357,5357,2758,2758	0,1222,1222,0,0,0,0,0,0,0,0,0,0,0,0,0	3,3,3,4,-1,-1,3,2,-1,3,-1,2,-1,-1,-1,-1
ENSG00000160097.16_3	chr1	33327869	33338083	-	3139	9	9	39	27	17	6	34	0	1	55	36	43	FNDC5	ENSG00000160097.16_3	7	ENST00000483143.1_1,ENST00000481487.1_1,ENST00000373471.7_3,ENST00000497068.1_1,ENST00000640867.1_2,ENST00000496770.1_2,ENST00000465346.1_1	2,2,6,2,6,5,2	306,1561,2726,405,633,832,190	442,888,5819,758,5819,7199,1418	235,1508,2031,350,198,348,102	442,888,2956,758,2956,3401,1418	0,0,0,0,2,0,0	4,4,6,4,6,5,4
ENSG00000121905.9_2	chr1	33351595	33364042	+	1991	0	0	0	0	0	0	0	0	0	0	0	1	HPCA	ENSG00000121905.9_2	5	ENST00000470166.5_1,ENST00000480118.5_1,ENST00000373467.3_1,ENST00000459874.5_1,ENST00000470896.1_1	3,3,4,3,2	528,540,1464,536,501	7541,7007,6747,7145,4416	298,398,881,378,396	7405,4248,4248,7009,4416	0,0,579,0,0	-1,-1,2,-1,-1
ENSG00000121900.18_2	chr1	33360195	33367039	-	1417	20	20	19	15	12	15	17	0	0	23	16	15	TMEM54	ENSG00000121900.18_2	6	ENST00000482771.1_1,ENST00000373463.7_1,ENST00000329151.5_1,ENST00000474144.5_1,ENST00000475208.5_1,ENST00000463914.1_1	2,6,5,6,5,5	567,993,866,742,763,601	426,5770,5928,5869,5829,1850	285,284,284,193,215,188	426,2904,2904,2904,2904,1438	0,0,0,0,0,0	4,6,5,8,7,7
ENSG00000221423.1	chr1	33391895	33392000	+	106	0	0	0	0	0	0	0	0	0	0	0	0	AL031602.1	ENSG00000221423.1	1	ENST00000408496.1	1	105	0	105	0	0	-1
ENSG00000116514.16_3	chr1	33402046	33430286	-	2610	527	649	734	571	673	689	636	0	41	1183	1201	1241	RNF19B	ENSG00000116514.16_3	3	ENST00000373456.11_1,ENST00000356990.9_3,ENST00000235150.4_1	9,9,9	2551,2589,2325	25689,25642,25692	814,855,634	14277,14277,14277	0,0,0	9,9,9
ENSG00000278966.2_4	chr1	33439154	33440064	+	911	1	5	3	0	0	1	0	0	2	1	2	0	RP5-1174N9.2	ENSG00000278966.2_4	2	ENST00000633169.1_1,ENST00000623226.1_1	1,1	910,374	0,0	910,374	0,0	0,0	-1,-1
ENSG00000267885.1	chr1	33439268	33439642	+	375	0	3	2	0	0	0	0	0	1	1	2	0	FKSG48	ENSG00000267885.1	1	ENST00000594612.1	1	374	0	374	0	374	1
ENSG00000217644.5_4	chr1	33445548	33446073	+	526	0	0	0	0	0	0	0	0	0	0	0	0	RP4-803A2.1	ENSG00000217644.5_4	1	ENST00000401937.3_1	1	525	0	525	0	0	-1
ENSG00000239670.1_4	chr1	33452553	33453834	+	863	0	0	0	0	0	0	0	0	0	0	0	0	RP4-803A2.2	ENSG00000239670.1_4	1	ENST00000447420.1_1	2	861	420	672	420	0	-1
ENSG00000236065.2_5	chr1	33452676	33498070	+	1680	0	0	0	0	0	0	0	0	0	0	0	0	RP1-117O3.2	ENSG00000236065.2_5	1	ENST00000427524.1_1	2	1678	43716	1434	43716	0	-1
ENSG00000004455.16_2	chr1	33473541	33546597	-	5727	2927	3905	4532	4203	2990	2809	3209	10	27	2318	3818	3816	AK2	ENSG00000004455.16_2	15	ENST00000629371.2_2,ENST00000373449.6_1,ENST00000548033.5_2,ENST00000482191.1_1,ENST00000491241.1_1,ENST00000467905.5_2,ENST00000480134.5_2,ENST00000354858.10_1,ENST00000550338.5_1,ENST00000469238.1_1,ENST00000466029.1_1,ENST00000487289.1_1,ENST00000548559.1_1,ENST00000551979.1_1,ENST00000626911.1_1	6,7,6,2,4,8,5,6,7,3,2,5,5,2,2	3570,3579,930,597,592,872,806,1015,879,420,221,915,525,579,158	25401,25307,25432,1241,2064,25259,23027,22933,22816,6905,6999,16246,58864,12169,5075	2893,2849,355,314,262,195,358,358,195,229,111,478,125,447,123	12169,12169,15033,1241,1085,12169,12169,12169,6977,6773,6999,12169,48538,12169,5075	0,0,0,0,0,0,0,0,0,0,0,0,0,0,0	4,7,6,4,6,7,4,6,2,5,4,5,7,4,2
ENSG00000142920.16_2	chr1	33546705	33586131	+	6559	74	80	90	57	58	53	69	0	0	68	84	72	AZIN2	ENSG00000142920.16_2	19	ENST00000478635.5_1,ENST00000294517.10_1,ENST00000481886.5_1,ENST00000475935.5_1,ENST00000462920.5_1,ENST00000471119.5_1,ENST00000495135.5_1,ENST00000477570.5_1,ENST00000483027.5_1,ENST00000492420.5_1,ENST00000373443.7_1,ENST00000497710.5_1,ENST00000473089.5_1,ENST00000484656.5_1,ENST00000373440.5_1,ENST00000373441.1_1,ENST00000478204.5_1,ENST00000497280.1_1,ENST00000492521.1_1	5,12,9,10,4,8,3,6,5,6,11,6,5,7,5,9,8,2,2	773,2170,1977,4767,873,1798,426,873,721,1122,2037,833,691,5841,611,1434,2694,339,318	11523,37111,37404,34609,10193,37577,2540,14825,12828,11129,37325,10208,14994,33030,19032,36498,34921,1132,1994	190,350,485,2624,353,486,173,172,172,343,485,176,165,2628,173,214,1221,174,249	9696,19723,19723,19723,7923,19723,2446,10542,10542,7923,19723,7923,11774,19723,12580,19723,19723,1132,1994	0,1374,0,0,0,0,0,0,0,0,1374,0,0,0,610,1434,0,0,0	-1,4,-1,-1,-1,-1,-1,-1,-1,-1,3,-1,-1,-1,1,1,-1,-1,-1
ENSG00000278997.1_4	chr1	33607472	33608831	-	1360	2	0	0	0	0	0	1	0	0	0	0	1	RP11-131M11.2	ENSG00000278997.1_4	1	ENST00000622988.1_1	1	1359	0	1359	0	0	3
ENSG00000116525.13_2	chr1	33611003	33647660	-	3646	52	63	60	28	30	27	40	1	0	70	61	77	TRIM62	ENSG00000116525.13_2	4	ENST00000291416.9_1,ENST00000543586.1_2,ENST00000485148.1_1,ENST00000486583.1_1	5,5,4,2	3432,1633,802,304	32832,28215,21559,500	2325,1025,396,239	15459,10842,15459,500	0,0,0,0	5,5,6,4
ENSG00000279179.1_4	chr1	33628452	33631899	+	3448	3	2	9	3	2	6	13	0	5	11	3	1	RP11-131M11.3	ENSG00000279179.1_4	1	ENST00000624339.1_1	1	3447	0	3447	0	0	-1
ENSG00000284721.1_2	chr1	33660389	33665954	+	1947	0	1	0	0	0	0	0	0	3	0	0	0	RP11-131M11.4	ENSG00000284721.1_2	2	ENST00000641271.1_1,ENST00000641727.1_1	2,2	1930,30	3635,3639	1450,16	3635,3639	0,0	-1,-1
ENSG00000160094.14_3	chr1	33722146	33766320	+	3331	333	357	683	373	182	113	621	0	49	761	848	978	ZNF362	ENSG00000160094.14_3	5	ENST00000483388.5_2,ENST00000539719.5_1,ENST00000490959.2_1,ENST00000373428.5_1,ENST00000477934.1_1	4,9,3,8,2	708,3097,194,2928,493	23161,41049,18435,27216,1130	290,1789,125,1789,386	19446,13833,13833,13126,1130	0,1255,0,1255,0	2,2,-1,1,-1
ENSG00000270115.1_5	chr1	33726813	33727281	+	469	16	15	17	12	12	9	30	0	0	49	53	41	RP11-415J8.7	ENSG00000270115.1_5	1	ENST00000602618.1_1	1	468	0	468	0	0	-1
ENSG00000256142.1	chr1	33764975	33766320	+	1345	114	113	266	150	74	36	237	0	35	347	312	357	AL513327.1	ENSG00000256142.1	1	ENST00000543783.1	2	1343	2	779	2	0	-1
ENSG00000184389.9_2	chr1	33772367	33786699	-	1023	1	1	0	1	1	1	0	0	0	0	0	0	A3GALT2	ENSG00000184389.9_2	1	ENST00000442999.3_1	5	1018	13314	687	8186	0	5
ENSG00000225313.5_4	chr1	33772949	33814846	+	4015	6	6	6	5	7	6	0	0	3	4	7	3	RP11-415J8.3	ENSG00000225313.5_4	11	ENST00000627421.1_1,ENST00000588828.1_1,ENST00000624453.3_2,ENST00000630229.1_2,ENST00000457957.2_2,ENST00000587696.2_2,ENST00000625117.1_2,ENST00000624012.1_2,ENST00000628643.2_2,ENST00000630909.2_2,ENST00000627130.1_2	2,2,2,2,3,3,2,2,2,2,4	834,789,854,868,633,1429,422,1045,549,835,542	17716,17743,17731,18172,18039,11150,11463,10357,7477,19369,23075	745,718,775,789,422,723,221,758,406,692,177	17716,17743,17731,18172,10798,10357,11463,10357,7477,19369,21156	0,0,0,0,0,0,0,0,0,0,0	-1,-1,-1,-1,-1,-1,-1,-1,-1,-1,-1
ENSG00000134686.18_4	chr1	33789224	33896653	-	4975	2220	2405	2286	1534	2182	1784	1976	7	33	2850	2901	3155	PHC2	ENSG00000134686.18_4	12	ENST00000431992.5_2,ENST00000485928.5_1,ENST00000373418.7_1,ENST00000373422.7_3,ENST00000257118.5_1,ENST00000467894.5_1,ENST00000486897.5_1,ENST00000493483.5_1,ENST00000473158.1_1,ENST00000459964.1_1,ENST00000468406.5_1,ENST00000484692.1_1	13,8,7,8,14,8,5,6,4,3,6,3	3776,2540,2543,2791,3856,1458,542,754,519,456,761,424	48194,23645,23716,28792,48111,23737,19037,18947,3373,1234,23434,58302	1396,1393,1393,1393,1393,330,141,175,202,226,227,227	20109,15305,15305,20109,20109,15305,15307,15305,1686,962,17089,55383	0,0,0,0,0,0,0,0,0,0,0,0	13,10,7,8,14,10,7,8,6,5,8,5
ENSG00000266239.1	chr1	33797994	33798093	-	100	186	199	184	113	181	129	184	1	2	258	234	262	MIR3605	ENSG00000266239.1	1	ENST00000583214.1	1	99	0	99	0	0	3
ENSG00000222112.1	chr1	33802167	33802465	-	299	32	20	15	12	33	24	22	0	1	94	30	30	RN7SKP16	ENSG00000222112.1	1	ENST00000410180.1	1	298	0	298	0	0	3
ENSG00000233246.1_4	chr1	33815953	33828846	+	490	14	17	18	3	1	6	4	0	0	12	6	6	RP11-415J8.5	ENSG00000233246.1_4	1	ENST00000432703.1_1	3	487	12406	213	8414	0	-1
ENSG00000221225.1	chr1	33907626	33907712	-	87	0	0	0	0	0	0	0	0	0	0	0	0	AL138837.1	ENSG00000221225.1	1	ENST00000408298.1	1	86	0	86	0	0	3
ENSG00000234512.1_3	chr1	33931850	33934555	+	2706	0	0	0	0	0	0	0	0	0	0	0	0	RP1-149P10.1	ENSG00000234512.1_3	1	ENST00000413515.1_1	1	2705	0	2705	0	0	-1
ENSG00000121903.14_2	chr1	33938246	33962107	+	5308	186	192	236	215	248	224	222	0	5	224	208	202	ZSCAN20	ENSG00000121903.14_2	3	ENST00000361328.7_1,ENST00000373413.2_1,ENST00000480917.1_1	8,4,4	4308,2363,873	19553,17621,15711	2289,1611,526	8759,8759,8759	3125,1299,0	2,2,-1
ENSG00000235907.2_4	chr1	33977608	33978343	-	736	0	0	0	0	0	0	0	0	0	0	0	0	RP4-580O19.2	ENSG00000235907.2_4	1	ENST00000424879.2_1	1	735	0	735	0	0	3
ENSG00000121904.17_3	chr1	33979599	34631443	-	18157	0	0	0	0	0	1	0	0	0	3	1	0	CSMD2	ENSG00000121904.17_3	10	ENST00000373381.8_2,ENST00000373388.6_2,ENST00000619121.4_1,ENST00000241312.8_1,ENST00000465819.1_1,ENST00000373380.5_1,ENST00000489419.1_1,ENST00000373377.1_1,ENST00000338325.1_1,ENST00000471438.2_1	71,70,71,70,5,24,2,13,7,4	13627,13048,13359,13038,744,4355,2429,3199,1537,351	637649,638796,638485,638796,12493,113342,1359,24696,40574,26960	2571,2571,2571,2561,194,682,2321,1552,643,121	96640,96640,96640,96640,8120,29838,1359,5571,15849,18217	0,0,0,0,0,0,0,0,0,0	70,69,70,69,7,24,4,13,7,6
ENSG00000227000.2_2	chr1	34304124	34305741	+	1618	0	0	0	0	0	0	0	0	0	0	0	0	HSPD1P14	ENSG00000227000.2_2	1	ENST00000432666.2_1	1	1617	0	1617	0	0	-1
ENSG00000176256.10_3	chr1	34326076	34330392	+	2561	0	0	0	0	0	0	0	0	0	0	0	0	HMGB4	ENSG00000176256.10_3	4	ENST00000519684.5_1,ENST00000522796.1_2,ENST00000458277.1_1,ENST00000425537.1_1	2,4,3,2	2341,2501,434,628	1975,1790,848,86	1926,1926,204,528	1975,1135,654,86	560,560,0,0	2,4,-1,-1
ENSG00000231163.5_4	chr1	34334554	34351059	+	2253	0	0	0	0	0	0	0	0	0	0	0	0	RP5-1007G16.1	ENSG00000231163.5_4	6	ENST00000425631.5_1,ENST00000434181.5_1,ENST00000432447.5_1,ENST00000414868.1_1,ENST00000438719.1_1,ENST00000431046.1_1	8,3,3,3,2,3	1359,652,497,543,556,643	15146,2918,2985,3042,2540,9314	372,297,198,209,457,337	4458,2540,2537,2594,2540,6736	0,0,0,0,0,0	-1,-1,-1,-1,-1,-1
ENSG00000201148.1	chr1	34578550	34578664	+	115	0	0	0	0	0	0	0	0	0	0	0	0	RNA5SP42	ENSG00000201148.1	1	ENST00000364278.1	1	114	0	114	0	0	-1
ENSG00000142698.14_3	chr1	34632484	34684732	+	2576	0	0	0	0	1	0	0	0	0	0	0	0	C1orf94	ENSG00000142698.14_3	2	ENST00000373374.7_2,ENST00000488417.1_2	7,7	2129,2280	50119,39181	688,688	30054,19116	1221,1790	2,1
ENSG00000221053.1	chr1	34641467	34641550	-	84	0	0	0	0	0	0	0	0	0	0	0	0	AC115286.1	ENSG00000221053.1	1	ENST00000408126.1	1	83	0	83	0	0	3
ENSG00000270241.1_4	chr1	34742460	34742893	-	434	0	0	0	0	0	0	0	0	0	0	0	0	RP4-657M3.2	ENSG00000270241.1_4	1	ENST00000604298.1_1	1	433	0	433	0	0	3
ENSG00000207941.1	chr1	35135200	35135295	-	96	0	0	0	0	0	0	0	0	0	0	1	0	MIR552	ENSG00000207941.1	1	ENST00000385206.1	1	95	0	95	0	0	3
ENSG00000163866.8_3	chr1	35178338	35325417	-	8091	947	1121	1047	888	1026	1018	825	1	40	579	912	872	SMIM12	ENSG00000163866.8_3	6	ENST00000426886.1_1,ENST00000521580.2_1,ENST00000446026.1_1,ENST00000456842.1_1,ENST00000423898.1_1,ENST00000417239.1_1	5,2,2,2,2,3	2613,3452,2815,916,895,681	144385,3695,1204,3670,3473,2675	1883,3313,1883,813,633,293	137362,3695,1204,3670,3473,2101	0,-274,-274,-274,-274,-274	3,2,2,2,2,3
ENSG00000189280.3_2	chr1	35220648	35224113	+	1355	0	0	0	0	0	0	0	0	0	0	0	0	GJB5	ENSG00000189280.3_2	1	ENST00000338513.1_1	2	1353	2112	1205	2112	821	2
ENSG00000189433.5_2	chr1	35225342	35229325	+	2840	0	0	0	0	0	0	0	0	0	0	0	0	GJB4	ENSG00000189433.5_2	1	ENST00000339480.1_1	2	2838	1145	2791	1145	800	2
ENSG00000255811.1_5	chr1	35227027	35253698	-	560	0	0	0	0	0	0	0	0	0	0	0	0	RP1-34M23.5	ENSG00000255811.1_5	1	ENST00000542839.1_1	2	558	26113	449	26113	0	4
ENSG00000216162.1	chr1	35244162	35244245	-	84	0	0	0	0	0	0	0	0	0	0	0	0	AL121988.1	ENSG00000216162.1	1	ENST00000401343.1	1	83	0	83	0	0	3
ENSG00000188910.7_2	chr1	35246790	35251970	+	2387	1	0	0	0	0	0	0	0	0	0	1	0	GJB3	ENSG00000188910.7_2	2	ENST00000373366.2_1,ENST00000373362.3_1	2,2	2215,1795	2960,2296	1626,1631	2960,2296	812,812	2,2
ENSG00000187513.8_2	chr1	35258599	35261348	+	1717	0	0	0	0	0	0	0	0	0	0	0	0	GJA4	ENSG00000187513.8_2	2	ENST00000342280.4_1,ENST00000450137.1_1	2,2	1620,1057	1129,1034	1550,988	1129,1034	1001,0	2,2
ENSG00000230163.1_4	chr1	35316295	35317156	+	720	0	0	0	0	0	0	0	0	0	0	0	0	RP5-997D16.2	ENSG00000230163.1_4	1	ENST00000429293.1_1	2	718	143	455	143	0	-1
ENSG00000116544.11_2	chr1	35331037	35395186	-	3977	1	2	6	4	2	3	2	0	0	8	1	4	DLGAP3	ENSG00000116544.11_2	3	ENST00000235180.4_1,ENST00000373347.5_1,ENST00000495979.1_1	10,12,3	3577,3844,471	36370,60305,19858	1106,1157,269	15889,22014,17937	0,0,0	10,12,5
ENSG00000252728.1	chr1	35409357	35409425	+	69	0	0	0	0	0	0	0	0	0	0	0	0	SNORD112	ENSG00000252728.1	1	ENST00000516919.1	1	68	0	68	0	0	-1
ENSG00000284773.1_1	chr1	35439957	35450914	-	3163	52	66	81	65	61	58	68	0	3	74	73	66	RP11-244H3.5	ENSG00000284773.1_1	1	ENST00000417456.1_2	2	3161	7796	3046	7796	0	2
ENSG00000241014.2_5	chr1	35441300	35444307	-	1887	10	11	28	13	25	17	31	0	1	20	24	23	RP11-244H3.1	ENSG00000241014.2_5	2	ENST00000311990.4_1,ENST00000642415.1_1	3,1	1884,925	1123,0	1703,925	594,0	0,0	5,3
ENSG00000271741.1_5	chr1	35447134	35497342	-	3099	793	817	798	706	872	748	717	1	3	715	894	848	RP11-244H3.4	ENSG00000271741.1_5	1	ENST00000487874.1_1	17	3082	47126	586	11581	0	16
ENSG00000243749.1_4	chr1	35447136	35450954	-	922	239	272	288	266	253	229	198	0	3	261	313	288	TMEM35B	ENSG00000243749.1_4	1	ENST00000373337.3_2	3	919	2899	584	1648	0	3
ENSG00000163867.16_3	chr1	35451766	35497569	-	9591	872	851	808	726	943	878	834	2	51	776	927	890	ZMYM6	ENSG00000163867.16_3	9	ENST00000493328.5_1,ENST00000357182.8_1,ENST00000466345.1_1,ENST00000472971.1_1,ENST00000415531.5_1,ENST00000317538.9_1,ENST00000460607.1_1,ENST00000373333.1_1,ENST00000471566.1_1	15,16,4,3,6,4,3,5,2	6226,4314,467,629,801,2698,2468,1468,684	39320,40674,4460,1280,15965,11963,12129,11709,1102	4146,1955,147,489,249,2358,2352,1089,564	11581,11581,1679,854,10080,10080,11348,10080,1102	0,0,0,0,0,0,0,0,0	17,16,6,5,8,4,5,5,4
ENSG00000233940.1_3	chr1	35519069	35524872	+	478	0	0	0	0	0	0	0	0	0	0	0	0	RP11-248I9.2	ENSG00000233940.1_3	1	ENST00000428087.1_1	2	476	5327	245	5327	0	-1
ENSG00000197056.9_2	chr1	35525387	35581460	+	4828	621	583	1072	884	641	647	884	3	8	766	955	957	ZMYM1	ENSG00000197056.9_2	10	ENST00000417119.5_1,ENST00000611874.4_1,ENST00000359858.8_1,ENST00000466390.5_1,ENST00000488455.5_1,ENST00000475654.5_1,ENST00000373329.5_1,ENST00000373330.1_1,ENST00000476269.1_1,ENST00000463393.1_1	11,11,10,4,11,5,9,11,4,4	1814,4455,4165,504,3044,660,3971,4192,604,596	51615,51615,32323,17708,32206,31856,32492,32276,3635,6938	249,2879,2878,277,1659,249,2877,2882,202,226	19069,19069,14472,14472,13878,16377,16377,13952,1736,5525	0,3420,3420,0,0,0,0,3420,0,0	3,3,2,-1,-1,-1,-1,3,-1,-1
ENSG00000228348.1_3	chr1	35587623	35588085	+	463	0	0	0	0	0	1	0	0	0	3	0	1	RP11-181E22.1	ENSG00000228348.1_3	1	ENST00000442409.1_1	1	462	0	462	0	0	-1
ENSG00000284640.1_2	chr1	35607116	35612036	-	1886	0	0	0	0	0	0	0	0	0	1	1	0	RP11-181E22.4	ENSG00000284640.1_2	1	ENST00000641402.1_1	3	1883	3037	1518	1834	0	5
ENSG00000116560.10_2	chr1	35641979	35658749	-	7426	8341	9744	12216	9919	10440	9198	12651	29	614	3629	4745	4263	SFPQ	ENSG00000116560.10_2	10	ENST00000471991.5_1,ENST00000468598.5_1,ENST00000460428.5_1,ENST00000470472.5_1,ENST00000466745.5_1,ENST00000466213.5_1,ENST00000490668.5_1,ENST00000485365.1_1,ENST00000485454.1_1,ENST00000357214.5_1	2,3,6,9,4,3,4,4,2,10	438,2832,458,865,658,1428,430,689,337,3737	845,1435,11206,13331,2067,1438,4534,4537,590,6479	342,2656,121,196,440,1257,209,471,190,1661	845,845,8965,8965,848,848,3099,3099,590,2408	0,0,199,202,0,0,0,0,0,0	4,5,4,7,6,5,6,6,4,10
ENSG00000201868.1	chr1	35661570	35661663	+	94	0	0	0	1	0	0	0	0	0	0	0	0	Y_RNA	ENSG00000201868.1	1	ENST00000364998.1	1	93	0	93	0	0	-1
ENSG00000263591.1	chr1	35729823	35730083	-	261	0	0	0	1	0	0	0	0	3	0	1	0	RN7SL136P	ENSG00000263591.1	1	ENST00000583196.1	1	260	0	260	0	0	3
ENSG00000146463.11_3	chr1	35734568	35887659	+	7647	2719	3423	3777	3159	3215	2993	3667	4	16	2271	3073	2952	ZMYM4	ENSG00000146463.11_3	6	ENST00000314607.10_1,ENST00000441447.1_1,ENST00000457946.1_1,ENST00000482131.1_1,ENST00000470175.1_1,ENST00000492456.1_1	30,4,24,3,5,3	6964,462,5979,637,422,489	146013,89734,54374,8499,4360,2719	2474,304,2588,481,144,350	56275,33520,10632,8240,2813,2540	4617,0,3598,0,0,0	1,4,-1,-1,-1,-1
ENSG00000240374.2	chr1	35757801	35758099	-	299	0	0	0	0	0	0	0	0	0	0	0	0	RN7SL503P	ENSG00000240374.2	1	ENST00000475222.2	1	298	0	298	0	0	3
ENSG00000201542.1	chr1	35775875	35776026	+	152	3	1	5	5	5	6	4	0	0	6	10	7	SNORA62	ENSG00000201542.1	1	ENST00000364672.1	1	151	0	151	0	0	-1
ENSG00000229994.1_3	chr1	35816323	35817208	+	886	44	52	57	51	46	45	48	0	0	130	87	127	RP4-765A10.1	ENSG00000229994.1_3	1	ENST00000434805.1_1	1	885	0	885	0	0	-1
ENSG00000227409.1_4	chr1	35824423	35831678	-	459	0	0	0	0	0	0	0	0	0	0	0	0	RP4-765A10.2	ENSG00000227409.1_4	1	ENST00000432683.1_1	2	457	6798	346	6798	0	4
ENSG00000202129.1	chr1	35893417	35893494	-	78	2	1	4	0	0	0	0	0	0	1	2	1	RNY5P1	ENSG00000202129.1	1	ENST00000365259.1	1	77	0	77	0	0	3
ENSG00000142687.17_3	chr1	35899091	36023551	-	9629	3646	3140	2924	2219	3843	3278	2852	6	238	4636	4509	4566	KIAA0319L	ENSG00000142687.17_3	20	ENST00000325722.7_1,ENST00000373266.8_1,ENST00000426982.6_1,ENST00000461312.5_1,ENST00000485551.5_1,ENST00000473423.1_1,ENST00000473844.1_1,ENST00000474856.1_1,ENST00000492544.1_1,ENST00000440579.5_3,ENST00000467109.1_1,ENST00000431916.5_3,ENST00000482929.6_1,ENST00000478463.6_1,ENST00000470388.5_1,ENST00000492888.1_1,ENST00000469892.5_3,ENST00000494948.1_3,ENST00000476329.1_1,ENST00000473465.1_1	21,12,21,5,15,2,4,2,4,13,2,6,8,6,6,4,4,3,3,2	4768,2365,3192,665,4383,418,509,293,474,2158,410,906,1516,1483,866,868,885,763,567,467	119155,18237,119498,8261,27981,570,6235,3870,3448,101194,673,45653,96060,89314,89899,81875,77458,47485,23940,450	1591,976,523,293,2596,349,159,267,148,523,274,255,523,523,246,523,523,396,345,286	47215,5966,47215,5450,4168,570,3870,3870,1781,47215,673,27400,47215,47215,75138,50415,47215,47215,20909,450	0,0,0,0,0,0,0,0,0,0,0,0,0,0,0,0,0,0,0,0	21,12,23,7,17,4,6,4,6,15,4,8,6,6,3,6,6,5,5,4
ENSG00000236274.1_4	chr1	35975343	35977039	+	1003	0	0	0	0	0	1	0	0	0	0	0	0	RP4-728D4.3	ENSG00000236274.1_4	1	ENST00000442276.1_1	4	999	697	491	365	0	-1
ENSG00000020129.15_3	chr1	36023074	36032875	+	4917	553	542	489	289	698	571	591	2	46	661	559	547	NCDN	ENSG00000020129.15_3	6	ENST00000373253.7_2,ENST00000356090.8_2,ENST00000373243.6_2,ENST00000459931.1_1,ENST00000437806.1_1,ENST00000423723.1_1	7,8,7,4,3,4	3670,3425,3676,1037,927,982	5629,5562,5289,1975,1501,3824	1545,1552,1546,517,608,451	1318,1318,1318,1079,1079,2914	2133,2183,2183,0,0,577	2,2,1,-1,2,-1
ENSG00000239636.1_4	chr1	36035414	36043330	-	1030	1	2	3	2	2	0	2	0	0	0	2	5	RP4-728D4.2	ENSG00000239636.1_4	2	ENST00000425881.1_1,ENST00000444348.1_1	2,3	281,849	3653,7065	175,407	3653,4441	0,0	4,5
ENSG00000116819.6_2	chr1	36038971	36060929	+	2189	7	6	24	5	11	11	19	0	0	22	15	11	TFAP2E	ENSG00000116819.6_2	1	ENST00000373235.3_1	7	2182	19776	934	13330	1322	1
ENSG00000126067.11_2	chr1	36065145	36107445	-	4843	2418	3204	2666	1953	4545	3650	2182	3	788	1697	2539	2821	PSMB2	ENSG00000126067.11_2	3	ENST00000621781.4_1,ENST00000373237.3_1,ENST00000630477.1_1	5,6,5	4212,2695,1122	27781,37565,27781	3830,1790,740	21866,21866,21866	0,0,0	5,6,7
ENSG00000239859.2	chr1	36171626	36171875	-	250	0	0	0	1	1	0	1	0	1	0	1	0	RN7SL281P	ENSG00000239859.2	1	ENST00000464618.2	1	249	0	249	0	0	3
ENSG00000142686.7_2	chr1	36179476	36185073	-	3629	39	27	63	71	17	27	55	0	4	30	30	22	C1orf216	ENSG00000142686.7_2	3	ENST00000270815.4_1,ENST00000503824.1_1,ENST00000453178.1_1	2,2,3	3216,576,489	2381,175,2207	2451,410,187	2381,175,2032	-685,0,0	2,4,5
ENSG00000092853.13_3	chr1	36185819	36235568	-	5411	989	1361	1675	1488	956	845	1245	3	9	1213	1983	2115	CLSPN	ENSG00000092853.13_3	6	ENST00000251195.9_3,ENST00000466308.1_1,ENST00000318121.7_1,ENST00000373220.7_1,ENST00000520551.1_3,ENST00000517467.1_1	25,4,25,24,25,3	4744,713,4144,3953,3985,550	45005,849,29379,29570,29538,1259	762,325,574,574,574,369	15934,308,6406,8836,6406,915	0,0,0,0,0,0	25,6,25,24,25,5
ENSG00000232335.1_4	chr1	36204990	36209177	+	539	0	0	0	2	2	2	1	0	0	0	5	3	RP11-435D7.3	ENSG00000232335.1_4	1	ENST00000373226.2_1	2	537	3650	413	3650	0	-1
ENSG00000134698.10_2	chr1	36273773	36323491	+	7267	752	756	559	496	777	744	602	4	154	803	656	624	AGO4	ENSG00000134698.10_2	3	ENST00000373210.3_1,ENST00000488778.1_1,ENST00000496257.1_1	18,3,2	7098,519,295	42620,9003,975	4393,341,214	8447,8407,975	2568,0,0	1,-1,-1
ENSG00000092847.11_3	chr1	36335409	36396129	+	13886	2340	2786	3064	1996	2293	1692	2757	3	17	2151	2318	2417	AGO1	ENSG00000092847.11_3	3	ENST00000373206.5_2,ENST00000373204.5_1,ENST00000635259.1_2	19,19,17	3977,13689,2819	47173,33630,24620	1459,11029,520	18524,6723,6723	2332,2555,398	3,1,-1
ENSG00000271164.1_4	chr1	36338871	36339353	-	483	0	0	0	0	0	0	0	0	1	0	0	0	RP4-789D17.4	ENSG00000271164.1_4	1	ENST00000604465.1_1	1	482	0	482	0	0	3
ENSG00000271914.1_4	chr1	36395321	36395716	-	396	10	1	5	3	0	5	4	0	1	4	2	0	RP4-789D17.5	ENSG00000271914.1_4	1	ENST00000606838.1_1	1	395	0	395	0	0	3
ENSG00000126070.19_2	chr1	36396319	36538101	+	21157	1456	1398	1491	1245	1348	1264	1615	3	217	1289	1217	1208	AGO3	ENSG00000126070.19_2	7	ENST00000324350.9_1,ENST00000373191.8_1,ENST00000397828.3_1,ENST00000634486.1_1,ENST00000246314.10_1,ENST00000491443.2_1,ENST00000471099.1_1	7,19,6,21,17,3,2	1719,19668,1029,3578,3194,545,600	50972,121754,50541,121566,122010,6092,11398	788,16863,363,602,825,217,316	21092,30830,21092,26161,32109,4949,11398	684,2564,684,192,1867,0,0	2,1,1,1,4,-1,-1
ENSG00000271554.1_4	chr1	36457710	36479231	-	659	0	0	0	0	0	0	0	0	0	0	0	0	RP4-665N4.8	ENSG00000271554.1_4	2	ENST00000466576.2_1,ENST00000479395.2_1	3,2	364,383	21044,3866	199,205	11710,3866	0,0	5,4
ENSG00000232862.5_4	chr1	36545667	36549627	-	1674	1	0	0	1	0	0	0	0	0	0	0	0	RP4-665N4.4	ENSG00000232862.5_4	2	ENST00000446354.2_1,ENST00000437804.2_1	3,1	1671,897	2289,0	1445,897	1574,0	0,0	5,3
ENSG00000092850.11_2	chr1	36549676	36553876	+	1978	5	2	5	2	0	2	3	0	2	7	8	2	TEKT2	ENSG00000092850.11_2	3	ENST00000207457.7_1,ENST00000469024.1_1,ENST00000473120.1_1	10,10,3	1499,1728,750	2701,2209,274	302,336,547	721,663,146	1284,324,286	2,2,-1
ENSG00000116863.10_2	chr1	36554476	36559533	+	1668	490	667	625	639	710	614	602	3	6	431	730	728	ADPRHL2	ENSG00000116863.10_2	1	ENST00000373178.4_1	6	1662	3395	835	2129	1086	1
ENSG00000171812.12_4	chr1	36560837	36590821	-	4670	10	11	22	8	6	8	17	0	5	44	23	22	COL8A2	ENSG00000171812.12_4	3	ENST00000397799.1_4,ENST00000303143.9_4,ENST00000481785.1_4	4,2,2	4666,4445,2034	25318,563,708	4251,4246,1980	15450,563,708	0,0,-1912	4,2,2
ENSG00000054116.11_2	chr1	36602171	36621654	-	3527	842	1008	1152	1030	1316	1259	896	1	67	746	902	945	TRAPPC3	ENSG00000054116.11_2	10	ENST00000616074.4_1,ENST00000616395.4_1,ENST00000617904.4_1,ENST00000373166.7_1,ENST00000462715.1_1,ENST00000373163.5_1,ENST00000373162.5_1,ENST00000469757.1_1,ENST00000373159.1_1,ENST00000497251.1_1	3,5,5,5,3,5,5,2,5,3	1111,1331,1300,1260,2425,946,1051,219,585,712	11833,11613,18183,11637,1992,11560,11392,12015,11015,9176	752,752,752,750,1397,377,405,159,159,420	11359,9171,15717,9171,1742,9094,8926,12015,9171,8926	0,0,0,0,0,0,0,0,0,0	3,5,5,5,5,5,5,4,4,5
ENSG00000116871.15_4	chr1	36621180	36646450	+	5271	557	592	434	288	703	569	287	1	179	758	522	527	MAP7D1	ENSG00000116871.15_4	13	ENST00000429533.6_3,ENST00000316156.8_3,ENST00000527764.1_1,ENST00000373150.8_3,ENST00000373151.6_3,ENST00000530729.1_3,ENST00000462118.1_1,ENST00000474796.1_1,ENST00000530975.4_3,ENST00000487131.3_1,ENST00000373148.5_1,ENST00000532131.1_1,ENST00000487114.1_1	6,16,3,18,17,4,2,5,4,5,10,4,4	953,3440,942,3220,3307,563,774,901,740,728,1787,767,886	18476,21444,14706,21431,21331,14762,737,3464,1365,1488,1576,546,408	344,601,344,601,592,344,659,382,328,328,584,614,536	15238,14508,14508,14508,14508,13681,737,1420,1031,1031,299,237,181	0,2396,0,2409,2509,0,0,0,0,0,0,0,0	2,1,-1,1,1,2,-1,-1,-1,-1,-1,-1,-1
ENSG00000264592.1	chr1	36657516	36657769	+	254	0	0	0	0	0	0	0	0	0	0	0	0	RN7SL131P	ENSG00000264592.1	1	ENST00000579043.1	1	253	0	253	0	0	-1
ENSG00000054118.13_4	chr1	36690017	36770958	+	4736	6127	7660	8435	7014	6774	6257	7102	17	71	5604	8015	7883	THRAP3	ENSG00000054118.13_4	4	ENST00000354618.9_2,ENST00000469141.6_2,ENST00000478853.1_2,ENST00000466743.1_1	12,13,4,5	4420,3326,376,532	76521,76390,57875,3919	1561,902,151,172	34877,34280,33919,1610	2858,2858,0,0	3,4,4,-1
ENSG00000231849.1_3	chr1	36707499	36707757	-	259	0	0	0	0	0	0	0	0	0	0	0	0	RP11-238O13.1	ENSG00000231849.1_3	1	ENST00000447495.1_1	1	258	0	258	0	0	3
ENSG00000214193.10_5	chr1	36771988	36790487	+	4474	304	266	420	263	427	390	274	1	41	465	579	659	SH3D21	ENSG00000214193.10_5	6	ENST00000453908.7_4,ENST00000505871.6_2,ENST00000480549.5_1,ENST00000496636.1_1,ENST00000508854.1_1,ENST00000474766.1_1	16,13,12,4,2,5	2392,2192,3170,379,1132,2038	12451,11928,14599,2085,363,1887	1123,1123,1123,157,1076,758	9481,9481,9481,1036,363,1106	2255,1925,401,0,0,0	1,1,1,-1,-1,-1
ENSG00000142694.6_2	chr1	36787632	36789755	-	1211	61	90	68	69	87	114	59	0	15	130	105	68	EVA1B	ENSG00000142694.6_2	2	ENST00000270824.1_1,ENST00000490466.1_1	3,3	1051,696	1072,638	694,444	826,392	0,0	3,5
ENSG00000116883.8_5	chr1	36789335	36794822	+	1838	24	24	27	17	33	19	23	0	27	33	57	45	RP11-268J15.5	ENSG00000116883.8_5	1	ENST00000373137.2_1	2	1836	3651	1501	3651	0	-1
ENSG00000196182.10_3	chr1	36805225	36851497	-	5590	1947	2186	2377	1536	3360	2773	1391	3	31	1692	2060	2149	STK40	ENSG00000196182.10_3	8	ENST00000359297.6_1,ENST00000373129.7_2,ENST00000373130.7_2,ENST00000373132.3_2,ENST00000460417.5_1,ENST00000473733.5_1,ENST00000482458.1_1,ENST00000460017.1_1	9,12,11,11,5,5,6,3	4828,3834,3617,3610,676,624,894,508	16888,42426,42647,42662,10191,6779,29696,17514	3824,2349,2349,2349,228,180,232,230	5549,17639,24383,24383,4631,2806,17639,12949	0,0,0,0,0,0,0,0	9,12,11,11,7,7,8,5
ENSG00000181817.5_2	chr1	36856839	36863493	-	1496	200	383	303	106	399	180	193	1	3	152	226	235	LSM10	ENSG00000181817.5_2	3	ENST00000476041.1_1,ENST00000315732.2_1,ENST00000489912.1_1	4,2,2	1002,848,399	5647,3614,3465	387,723,260	3614,3614,3465	0,-367,0	6,2,4
ENSG00000222821.1	chr1	36868322	36868460	-	139	0	0	0	0	0	0	0	0	0	0	0	0	RNU4-27P	ENSG00000222821.1	1	ENST00000410889.1	1	138	0	138	0	0	3
ENSG00000116885.18_3	chr1	36881428	36916052	-	2788	9	9	37	27	29	29	19	0	1	44	27	32	OSCP1	ENSG00000116885.18_3	12	ENST00000468441.5_1,ENST00000495222.5_1,ENST00000235532.9_2,ENST00000356637.9_3,ENST00000471369.1_1,ENST00000433045.6_1,ENST00000445843.7_1,ENST00000475160.1_1,ENST00000525869.1_1,ENST00000528112.1_1,ENST00000354267.3_1,ENST00000524789.1_1	4,4,10,11,2,10,9,3,2,5,5,4	501,654,1445,1452,646,1371,980,400,319,704,762,277	5853,4911,31100,31071,736,21661,31239,2084,549,15510,21382,17441	268,349,349,345,344,312,195,282,217,244,185,154	2896,3895,11348,8336,736,8336,11348,1535,549,8336,11348,8903	223,0,0,0,0,0,222,0,0,0,0,240	4,6,10,11,4,10,8,5,4,7,5,2
ENSG00000201448.1	chr1	36884051	36884179	-	129	1	0	0	0	0	0	0	0	0	0	0	1	SNORA63	ENSG00000201448.1	1	ENST00000364578.1	1	128	0	128	0	0	3
ENSG00000116898.11_2	chr1	36921319	36930038	-	2916	1657	1942	2234	2162	1712	1610	1548	4	192	1018	1647	1601	MRPS15	ENSG00000116898.11_2	4	ENST00000373116.5_1,ENST00000488606.5_1,ENST00000477040.1_1,ENST00000462067.1_1	8,3,2,4	998,2124,531,1608	7721,1807,262,6963	291,1780,379,1203	2711,1545,262,5156	0,0,0,0	8,5,4,6
ENSG00000119535.17_4	chr1	36931644	36948879	-	8429	499	496	394	288	353	305	402	0	10	264	296	244	CSF3R	ENSG00000119535.17_4	15	ENST00000373106.5_2,ENST00000373104.5_2,ENST00000373103.5_2,ENST00000480825.6_1,ENST00000361632.8_2,ENST00000464465.6_1,ENST00000331941.6_2,ENST00000487540.6_1,ENST00000484762.1_1,ENST00000466138.1_1,ENST00000464365.2_1,ENST00000469380.1_1,ENST00000526980.5_1,ENST00000489551.5_1,ENST00000533491.1_1	17,18,17,9,15,7,16,10,4,2,9,2,4,3,4	3356,2935,3437,6065,2832,1433,2359,1921,673,333,1650,319,924,784,508	13879,14300,13798,4218,10643,3958,11064,4348,821,247,5014,142,4992,3236,2111	784,467,865,1435,783,744,296,709,254,251,509,253,694,602,272	3760,3760,3760,1593,3760,1593,3760,1593,403,247,1593,142,1962,1962,1398	0,0,0,0,0,276,0,0,0,0,0,0,0,0,0	17,18,17,11,15,7,16,12,6,4,11,4,6,5,6
ENSG00000230214.1_3	chr1	37095936	37096458	+	523	0	0	0	0	0	0	0	0	0	0	0	0	RP4-655C4.1	ENSG00000230214.1_3	1	ENST00000453860.1_1	1	522	0	522	0	0	-1
ENSG00000284705.1_2	chr1	37169554	37176183	+	2694	0	0	0	0	0	0	0	0	0	0	0	0	RP11-251B9.1	ENSG00000284705.1_2	1	ENST00000641463.1_1	2	2692	3937	1363	3937	0	-1
ENSG00000284720.1_2	chr1	37233723	37235326	-	1521	0	0	0	0	0	0	0	0	0	0	0	0	RP4-614N24.3	ENSG00000284720.1_2	1	ENST00000642109.1_1	2	1519	84	1030	84	0	4
ENSG00000234481.1_4	chr1	37238741	37241369	+	463	0	0	0	0	0	0	0	0	0	0	0	0	RP4-614N24.1	ENSG00000234481.1_4	1	ENST00000451375.1_1	2	461	2167	288	2167	0	-1
ENSG00000163873.9_3	chr1	37261128	37499730	-	10111	0	0	0	0	0	0	0	0	0	0	0	0	GRIK3	ENSG00000163873.9_3	4	ENST00000373091.7_1,ENST00000373093.4_1,ENST00000462621.1_1,ENST00000479620.1_1	16,15,4,2	9085,2940,554,548	229513,226571,8908,3191	6518,619,306,476	142898,142898,5386,3191	0,0,0,0	16,15,6,4
ENSG00000284650.1_2	chr1	37599090	37601747	+	1039	0	0	0	0	0	0	0	0	0	1	0	0	RP3-406M12.1	ENSG00000284650.1_2	1	ENST00000642067.1_1	2	1037	1620	919	1620	0	-1
ENSG00000264698.1	chr1	37627164	37627235	+	72	0	0	0	0	0	0	0	0	0	0	0	0	MIR4255	ENSG00000264698.1	1	ENST00000579351.1	1	71	0	71	0	0	-1
ENSG00000207328.1	chr1	37669211	37669317	+	107	0	0	0	0	0	0	0	0	0	0	0	0	RNU6-636P	ENSG00000207328.1	1	ENST00000384598.1	1	106	0	106	0	0	-1
ENSG00000223944.1_4	chr1	37728340	37790701	-	596	0	0	0	0	0	0	0	0	0	0	0	0	RP5-1180C18.1	ENSG00000223944.1_4	1	ENST00000413901.1_1	4	592	61769	215	48731	0	6
ENSG00000252368.1	chr1	37730278	37730387	-	110	0	0	0	0	0	0	0	0	0	0	0	0	RNA5SP43	ENSG00000252368.1	1	ENST00000516559.1	1	109	0	109	0	0	3
ENSG00000230451.2_3	chr1	37796453	37796597	+	145	0	0	0	0	0	0	0	0	0	0	0	0	RP5-1090E8.1	ENSG00000230451.2_3	1	ENST00000438196.2_1	1	144	0	144	0	0	-1
ENSG00000233621.1_4	chr1	37920480	37940012	-	1395	28	36	11	8	44	40	23	0	1	76	41	34	RP11-422J8.1	ENSG00000233621.1_4	1	ENST00000424989.1_1	3	1392	18140	1033	17685	0	5
ENSG00000163874.10_3	chr1	37940153	37949980	+	3121	547	506	391	315	653	607	295	3	10	480	539	557	ZC3H12A	ENSG00000163874.10_3	4	ENST00000373087.6_1,ENST00000640233.1_1,ENST00000472312.1_1,ENST00000471012.1_3	6,6,2,2	2678,2715,591,393	7149,7065,1172,519	1642,1623,430,248	4351,4351,1172,519	1795,848,0,0	2,2,-1,-1
ENSG00000163875.15_3	chr1	37958176	37980375	-	3487	1084	1372	1166	1157	1347	1251	1015	2	7	1985	2392	2598	MEAF6	ENSG00000163875.15_3	9	ENST00000373075.6_1,ENST00000296214.9_1,ENST00000373074.5_1,ENST00000475828.5_1,ENST00000487788.5_1,ENST00000373073.8_1,ENST00000487792.5_1,ENST00000448519.2_2,ENST00000485039.1_1	8,7,6,8,9,6,8,8,4	2139,1518,1999,1400,1342,597,824,658,810	20049,20078,18959,20021,19992,20404,19909,18214,11295	1532,929,846,772,709,192,192,192,581	7282,7282,7282,7282,7282,7990,7282,7282,7282	0,0,0,0,0,0,0,0,0	8,7,6,10,11,6,10,7,6
ENSG00000263675.1	chr1	37966536	37966595	-	60	9	7	10	5	28	7	14	0	0	29	29	25	MIR5581	ENSG00000263675.1	1	ENST00000580821.1	1	59	0	59	0	0	3
ENSG00000163877.10_2	chr1	38000050	38019945	-	5769	646	767	627	523	660	622	533	1	31	559	741	736	SNIP1	ENSG00000163877.10_2	4	ENST00000296215.7_2,ENST00000638725.1_1,ENST00000468040.2_2,ENST00000493916.1_1	4,2,5,2	4601,2759,926,544	15294,2145,15314,1259	3563,1437,598,284	11890,2145,8066,1259	0,0,0,0	4,4,3,4
ENSG00000232273.1_3	chr1	38010364	38010895	+	532	0	0	0	0	0	1	1	0	0	19	6	3	FTHL1	ENSG00000232273.1_3	1	ENST00000437933.1_1	1	531	0	531	0	0	-1
ENSG00000237749.4_4	chr1	38021848	38022100	+	253	5	16	22	9	4	9	11	0	0	11	14	11	RP3-423B22.5	ENSG00000237749.4_4	1	ENST00000423216.2_1	1	252	0	252	0	0	-1
ENSG00000163879.10_2	chr1	38022520	38032458	+	4456	9	9	4	5	5	2	3	0	0	51	38	50	DNALI1	ENSG00000163879.10_2	5	ENST00000296218.7_1,ENST00000490312.1_1,ENST00000466723.1_1,ENST00000497858.1_1,ENST00000467277.1_1	6,2,4,2,3	2643,710,507,3537,618	7295,528,4683,2781,3127	1831,588,178,1830,334	2781,528,3809,2781,2781	837,0,0,0,0	1,-1,-1,-1,-1
ENSG00000134697.12_4	chr1	38032417	38061536	-	5745	1966	2584	2425	2399	2222	2093	1613	4	20	2011	2752	2778	GNL2	ENSG00000134697.12_4	9	ENST00000490029.1_1,ENST00000373062.7_1,ENST00000462812.5_1,ENST00000479255.1_1,ENST00000538069.2_4,ENST00000469191.1_1,ENST00000489146.1_1,ENST00000463351.1_1,ENST00000488496.1_1	2,16,4,3,5,3,2,3,2	633,2318,2405,419,693,530,628,490,537	666,26787,1671,1177,6635,6109,442,2823,1913	442,451,2042,186,203,386,568,330,361	666,5667,666,666,4786,5667,442,1867,1913	0,0,0,0,0,0,0,0,0	4,16,6,5,7,5,4,5,4
ENSG00000284748.1_2	chr1	38061727	38072937	+	1326	0	0	0	0	0	0	0	0	0	0	0	0	RP11-566C13.2	ENSG00000284748.1_2	1	ENST00000641190.1_1	2	1324	9886	1112	9886	0	-1
ENSG00000169218.13_2	chr1	38076951	38100595	-	3089	1	0	1	0	0	0	0	0	0	0	1	0	RSPO1	ENSG00000169218.13_2	4	ENST00000615459.4_1,ENST00000612451.4_1,ENST00000356545.6_1,ENST00000401068.1_1	8,7,8,8	2323,2456,2613,2312	21063,20930,20742,20492	1172,1172,1172,1109	13214,12893,12893,12893	0,0,0,0	7,6,7,8
ENSG00000116922.14_3	chr1	38147242	38157921	-	4434	502	504	879	701	557	563	472	1	16	326	491	435	C1orf109	ENSG00000116922.14_3	14	ENST00000358011.8_2,ENST00000494120.1_1,ENST00000609516.1_1,ENST00000464178.1_1,ENST00000464085.5_3,ENST00000491981.5_2,ENST00000461359.5_1,ENST00000477060.1_2,ENST00000486637.1_1,ENST00000491797.1_1,ENST00000488137.5_2,ENST00000472584.1_1,ENST00000619962.1_2,ENST00000498448.1_1	5,7,1,4,5,4,3,3,3,2,3,2,3,2	2350,2563,2621,808,914,608,760,605,849,647,714,720,556,745	6600,8083,0,6145,6479,8296,3487,5298,3273,333,1922,116,1925,449	1590,1590,2621,424,288,277,304,280,507,350,280,480,223,533	3154,3206,0,3154,3154,3154,3154,3154,3154,333,1592,116,1592,449	0,0,0,0,0,0,0,0,0,0,0,0,0,0	5,5,3,6,5,6,5,5,5,4,5,4,5,4
ENSG00000134690.10_2	chr1	38158090	38175391	+	2469	845	1161	1564	1043	761	572	1133	5	5	665	1152	1253	CDCA8	ENSG00000134690.10_2	2	ENST00000373055.5_1,ENST00000327331.2_1	10,11	2459,2292	14842,14940	1397,1391	2955,2955	833,833	1,2
ENSG00000183317.16_4	chr1	38179552	38230805	-	8152	9	17	18	9	12	9	32	0	2	30	27	24	EPHA10	ENSG00000183317.16_4	11	ENST00000432874.7_2,ENST00000534097.5_1,ENST00000437645.5_1,ENST00000444950.1_1,ENST00000446149.6_1,ENST00000427468.6_2,ENST00000373048.8_2,ENST00000453577.1_1,ENST00000540011.2_1,ENST00000525749.1_2,ENST00000319637.6_1	16,14,17,2,15,18,17,2,7,5,3	2080,1930,2316,419,1985,3149,5408,362,713,546,2047	15534,15757,36702,708,39852,46063,43684,816,29982,25255,2814	217,211,290,289,203,678,2512,197,171,171,1811	4201,4201,17486,708,21146,17486,17486,816,17486,17486,2112	1435,763,1668,0,0,0,0,0,0,274,0	6,10,7,4,17,18,17,4,7,3,3
ENSG00000200421.1	chr1	38203627	38203726	-	100	0	0	0	0	0	0	0	0	0	0	0	0	Y_RNA	ENSG00000200421.1	1	ENST00000363551.1	1	99	0	99	0	0	3
ENSG00000238871.1	chr1	38215874	38215974	+	101	0	0	0	0	0	0	0	0	0	0	0	0	snoU13	ENSG00000238871.1	1	ENST00000459008.1	1	100	0	100	0	0	-1
ENSG00000214141.4_3	chr1	38242342	38245090	+	1892	0	0	0	0	0	0	0	0	0	0	0	0	RP11-109P14.1	ENSG00000214141.4_3	1	ENST00000473049.1_1	2	1890	858	1299	858	0	-1
ENSG00000227416.2_4	chr1	38248129	38248557	-	429	0	1	0	0	0	0	0	0	4	0	0	0	RP11-109P14.2	ENSG00000227416.2_4	1	ENST00000417484.1_1	1	428	0	428	0	0	3
ENSG00000185090.14_2	chr1	38259474	38266809	+	3018	992	983	1377	1173	1115	901	907	5	6	795	1069	1071	MANEAL	ENSG00000185090.14_2	5	ENST00000373045.10_1,ENST00000397631.7_1,ENST00000532512.1_1,ENST00000525897.1_1,ENST00000329006.5_1	4,4,3,4,2	2681,2323,1012,1290,1928	4650,4927,4726,3750,3721	1566,1289,654,881,1570	2747,3024,3721,2747,3721	1370,749,390,789,706	1,1,-1,2,1
ENSG00000233728.1_4	chr1	38265392	38266551	-	700	1	1	2	4	1	3	4	0	0	3	3	6	RP11-109P14.9	ENSG00000233728.1_4	1	ENST00000433474.1_1	2	698	461	449	461	0	4
ENSG00000196449.3_2	chr1	38268616	38273857	-	1826	623	723	674	596	929	857	426	2	8	498	658	629	YRDC	ENSG00000196449.3_2	1	ENST00000373044.2_1	5	1821	3420	1053	2413	0	5
ENSG00000197982.13_4	chr1	38272651	38275126	+	2231	494	540	572	470	396	396	417	0	38	331	425	386	C1orf122	ENSG00000197982.13_4	4	ENST00000373043.1_4,ENST00000419397.3_1,ENST00000468084.1_4,ENST00000373042.4_4	2,2,3,3	2227,221,1231,970	246,851,471,338	1753,201,559,476	246,851,246,246	142,0,142,330	1,-1,2,1
ENSG00000188786.9_2	chr1	38275239	38325292	-	8024	481	470	575	438	825	749	508	0	15	442	473	474	MTF1	ENSG00000188786.9_2	2	ENST00000373036.4_1,ENST00000468190.1_1	11,2	7961,411	42092,779	5999,360	17093,779	0,0	11,4
ENSG00000230610.1	chr1	38292232	38293886	-	45	3	2	1	0	1	1	1	0	0	0	2	1	AL929472.1	ENSG00000230610.1	1	ENST00000448796.1	2	43	1611	30	1611	0	4
ENSG00000235673.1_4	chr1	38306658	38307348	+	691	0	0	0	0	0	0	0	0	0	0	0	0	RP11-109P14.8	ENSG00000235673.1_4	1	ENST00000447422.1_1	1	690	0	690	0	0	-1
ENSG00000230955.1_4	chr1	38326369	38327252	+	481	5	10	9	6	1	7	3	0	2	1	6	3	RP11-109P14.10	ENSG00000230955.1_4	1	ENST00000419993.1_1	2	479	404	394	404	0	-1
ENSG00000204084.12_3	chr1	38326369	38412729	-	8930	502	493	552	483	476	491	469	0	170	587	741	732	INPP5B	ENSG00000204084.12_3	11	ENST00000373027.5_1,ENST00000458109.6_1,ENST00000373023.6_1,ENST00000373026.5_1,ENST00000373024.7_1,ENST00000487328.1_1,ENST00000470364.5_1,ENST00000474758.1_1,ENST00000467066.1_1,ENST00000373021.1_1,ENST00000491406.2_3	18,20,24,23,24,2,5,2,4,6,7	3887,3959,4670,3207,3036,627,434,570,647,3928,579	67165,82365,81690,81034,81930,1882,6135,4316,2188,13869,5709	1733,1733,1733,380,345,537,113,457,316,3516,181	40219,40459,40219,40219,40459,1882,2210,4316,1063,8635,1863	0,0,0,0,0,0,0,0,0,0,0	18,20,24,23,24,4,7,4,6,6,9
ENSG00000252448.1	chr1	38349909	38349989	+	81	0	0	0	0	0	0	0	0	0	1	0	0	SNORA63	ENSG00000252448.1	1	ENST00000516639.1	1	80	0	80	0	0	-1
ENSG00000222282.1	chr1	38350695	38350789	+	95	0	0	0	0	0	0	0	0	0	0	0	0	RNU6-584P	ENSG00000222282.1	1	ENST00000410350.1	1	94	0	94	0	0	-1
ENSG00000183431.11_2	chr1	38422647	38456593	-	4740	3151	4521	3737	3473	3062	2964	2650	4	78	3534	4567	4294	SF3A3	ENSG00000183431.11_2	8	ENST00000373019.4_1,ENST00000487062.1_1,ENST00000460925.1_1,ENST00000489537.5_1,ENST00000461869.5_1,ENST00000470585.5_1,ENST00000488934.1_1,ENST00000462258.1_1	17,2,4,10,8,7,2,6	3656,773,789,881,768,697,271,521	30290,1857,9023,10046,10317,9907,1053,5334	1288,573,479,138,205,142,203,142	7869,1857,7149,2794,4769,4769,1053,2794	0,0,0,0,0,0,0,0	17,4,6,12,10,9,4,8
ENSG00000212541.1	chr1	38457134	38457241	+	108	0	2	1	0	0	0	0	0	0	3	0	1	RNU6-510P	ENSG00000212541.1	1	ENST00000391239.1	1	107	0	107	0	0	-1
ENSG00000183386.9_2	chr1	38462442	38471278	-	2004	201	194	147	88	136	104	82	1	2	283	285	310	FHL3	ENSG00000183386.9_2	5	ENST00000485803.5_1,ENST00000373016.3_1,ENST00000475084.5_1,ENST00000477194.5_1,ENST00000483132.1_1	5,6,4,6,2	1463,1641,878,1085,605	7269,7094,7438,7176,109	789,789,373,214,430	6209,5925,6209,6007,109	0,0,0,0,0	7,6,6,8,4
ENSG00000183520.11_3	chr1	38474930	38490496	+	3385	777	914	1147	986	731	752	694	2	15	880	1292	1348	UTP11	ENSG00000183520.11_3	4	ENST00000483182.5_1,ENST00000486563.1_1,ENST00000373014.4_1,ENST00000488453.1_1	6,2,8,6	567,748,2011,1889	9284,3494,10071,5329	151,617,1279,1187	3494,3494,3494,3316	0,0,754,0	-1,-1,1,-1
ENSG00000185668.7_3	chr1	38510283	38512466	-	2184	1	2	1	0	0	0	0	0	1	5	0	1	POU3F1	ENSG00000185668.7_3	1	ENST00000373012.4_2	1	2183	0	2183	0	-1351	1
ENSG00000224592.5_4	chr1	38512986	38584697	+	684	1	2	6	4	3	2	0	0	1	11	8	6	RP5-884C9.2	ENSG00000224592.5_4	2	ENST00000432922.5_1,ENST00000428151.1_1	4,5	589,568	57831,71032	300,189	54810,54803	0,0	-1,-1
ENSG00000223589.2_4	chr1	38546244	38546583	-	340	0	0	0	0	0	0	0	0	0	0	0	0	RP5-884C9.3	ENSG00000223589.2_4	1	ENST00000424719.2_1	1	339	0	339	0	0	3
ENSG00000265596.1	chr1	38554903	38555001	+	99	0	0	1	0	1	0	1	0	0	4	1	2	MIR3659	ENSG00000265596.1	1	ENST00000582606.1	1	98	0	98	0	0	-1
ENSG00000284623.1_2	chr1	38595136	38606265	-	1562	0	0	0	0	0	0	0	0	0	0	0	0	RP5-884C9.4	ENSG00000284623.1_2	1	ENST00000641212.1_1	5	1557	9572	1058	4073	0	7
ENSG00000237290.1_3	chr1	38674706	38680439	-	2283	0	0	0	0	0	0	0	0	0	0	0	0	RP11-214L19.1	ENSG00000237290.1_3	1	ENST00000431311.1_1	4	2279	3454	1788	2266	0	6
ENSG00000275350.1_4	chr1	38849510	38850094	-	585	0	0	0	0	0	0	0	0	0	0	0	0	RP11-329N22.2	ENSG00000275350.1_4	1	ENST00000611376.1_1	1	584	0	584	0	0	3
ENSG00000200796.1	chr1	38862331	38862437	+	107	0	0	0	0	0	0	0	0	0	0	0	0	RNU6-753P	ENSG00000200796.1	1	ENST00000363926.1	1	106	0	106	0	0	-1
ENSG00000238063.2_3	chr1	38940547	38961706	+	1497	0	0	0	0	0	0	0	0	1	0	0	0	RP11-329N22.1	ENSG00000238063.2_3	4	ENST00000634732.1_1,ENST00000634464.1_1,ENST00000634298.1_1,ENST00000452971.1_1	2,3,2,3	1237,1198,1105,787	369,19957,20007,501	949,945,907,628	369,17747,20007,369	0,0,0,0	-1,-1,-1,-1
ENSG00000215895.4_4	chr1	39174603	39176562	+	1960	5	14	19	3	4	6	5	0	0	1	5	1	RP11-334L9.1	ENSG00000215895.4_4	1	ENST00000442006.2_1	1	1959	0	1959	0	0	-1
ENSG00000284632.1_2	chr1	39219888	39281651	-	1240	0	0	0	0	0	0	0	0	0	0	0	0	RP11-334L9.2	ENSG00000284632.1_2	3	ENST00000641723.1_1,ENST00000641481.1_1,ENST00000641963.1_1	2,4,3	438,886,511	19854,60877,22407	407,407,195	19854,31141,19166	0,0,0	4,6,5
ENSG00000116954.7_2	chr1	39303870	39325495	-	5167	735	831	677	497	990	907	712	1	3	640	606	646	RRAGC	ENSG00000116954.7_2	4	ENST00000373001.3_1,ENST00000474456.1_1,ENST00000493015.1_1,ENST00000496778.1_1	7,2,5,2	2725,2490,740,566	18900,6235,10163,617	1506,2135,199,321	6235,6235,5528,617	0,0,0,0	7,4,7,4
ENSG00000273637.1_5	chr1	39305005	39340166	-	2171	620	736	767	598	845	771	601	1	4	578	663	639	RP5-864K19.7	ENSG00000273637.1_5	1	ENST00000622355.1_1	12	2159	33002	371	7555	0	14
ENSG00000228436.2_4	chr1	39325672	39385068	+	976	87	71	58	45	93	108	69	0	0	53	42	44	RP5-864K19.4	ENSG00000228436.2_4	3	ENST00000433671.2_1,ENST00000456813.1_1,ENST00000443161.1_1	4,2,2	626,439,422	58770,15702,2362	239,283,285	37522,15702,2362	0,0,0	-1,-1,-1
ENSG00000214114.8_3	chr1	39328636	39339777	-	3039	389	495	926	858	523	539	441	2	6	513	722	676	MYCBP	ENSG00000214114.8_3	4	ENST00000397572.4_3,ENST00000494695.4_3,ENST00000495043.5_1,ENST00000465771.3_1	5,4,4,4	2813,746,815,337	8328,8386,8127,7682	1750,478,378,129	5408,6019,5408,4963	0,0,0,0	5,3,6,6
ENSG00000274944.4_5	chr1	39330173	39347289	-	3251	170	202	399	370	239	250	182	1	3	229	324	284	RP5-864K19.6	ENSG00000274944.4_5	4	ENST00000489803.5_1,ENST00000454994.3_3,ENST00000489575.2_1,ENST00000621281.1_3	6,7,3,5	3225,2374,474,604	13871,14740,16599,16469	2598,1415,185,185	5408,5408,14433,8342	0,0,0,0	8,3,5,5
ENSG00000131233.9_3	chr1	39340123	39347259	-	2057	6	8	18	6	10	16	2	0	0	10	17	12	GJA9	ENSG00000131233.9_3	2	ENST00000360786.3_3,ENST00000357771.4_1	1,2	1900,1797	0,5239	1900,1642	0,5239	-1543,-1543	1,2
ENSG00000158315.10_2	chr1	39351479	39407471	-	2795	142	143	202	159	190	180	48	0	27	133	233	202	RHBDL2	ENSG00000158315.10_2	3	ENST00000372990.5_1,ENST00000289248.6_1,ENST00000540558.1_1	8,8,3	1829,2121,694	54148,38420,25602	876,883,370	22345,15253,22345	0,0,0	8,8,3
ENSG00000199963.1	chr1	39392542	39392649	+	108	1	0	2	0	0	0	0	0	0	2	0	1	RNU6-605P	ENSG00000199963.1	1	ENST00000363093.1	1	107	0	107	0	0	-1
ENSG00000207466.1	chr1	39416497	39416597	-	101	0	0	0	0	0	0	0	0	0	0	0	0	Y_RNA	ENSG00000207466.1	1	ENST00000384735.1	1	100	0	100	0	0	3
ENSG00000235549.1_3	chr1	39423947	39424597	-	350	0	0	0	1	0	0	0	0	0	0	0	0	RP11-781D11.1	ENSG00000235549.1_3	1	ENST00000428233.1_1	2	348	302	177	302	0	4
ENSG00000174574.15_3	chr1	39456895	39471731	+	2741	4832	5681	7127	5933	5997	6249	3373	17	784	4722	7892	7679	AKIRIN1	ENSG00000174574.15_3	4	ENST00000432648.7_1,ENST00000446189.6_1,ENST00000372984.8_1,ENST00000531822.1_2	5,4,4,4	2736,1239,1326,714	12100,12234,12240,12171	2014,716,809,336	6571,6571,9372,6571	574,440,434,388	1,1,1,-1
ENSG00000168653.10_2	chr1	39491990	39500308	+	548	2210	3101	2999	2926	2408	2354	1967	3	23	1827	2884	2927	NDUFS5	ENSG00000168653.10_2	2	ENST00000372969.7_1,ENST00000372967.3_1	3,3	545,541	7773,7777	244,244	5452,5452	319,319	2,2
ENSG00000127603.25_5	chr1	39546988	39952849	+	40739	19917	20971	15032	10874	13688	11132	13111	44	281	26072	18918	18839	MACF1	ENSG00000127603.25_5	34	ENST00000484793.5_1,ENST00000602421.5_1,ENST00000567887.5_2,ENST00000372915.7_2,ENST00000361689.6_1,ENST00000524432.5_1,ENST00000467673.5_1,ENST00000564288.5_2,ENST00000494012.1_1,ENST00000480624.5_1,ENST00000469366.1_1,ENST00000496804.5_1,ENST00000530262.5_1,ENST00000485063.1_1,ENST00000472385.1_1,ENST00000484393.1_1,ENST00000476350.1_1,ENST00000372925.6_1,ENST00000528611.1_1,ENST00000289893.8_1…	4,3,101,97,93,32,4,101,4,6,4,31,35,3,3,2,26,71,2,64,6,1,2,7,2,13,4,10,8,5,4,3,4,3	830,1420,24218,23343,17445,4306,788,24727,663,636,456,5034,6222,435,497,748,5278,14425,378,19077,5761,4283,596,835,321,2811,4156,2549,2291,472,522,624,2076,2686	20835,20889,378897,379505,385375,213291,148431,258204,49017,44642,38719,53726,83026,659,742,1528,67881,172248,2497,136772,12828,0,926,5828,895,30339,4047,25315,23949,17502,17570,11506,15548,15658	278,1023,5450,5450,1471,306,350,5450,436,167,164,1255,1160,175,337,421,994,1471,337,5515,4974,4283,449,226,279,1449,2543,1449,1449,196,318,425,1616,2386	18265,18265,146744,146744,146744,125465,125465,33716,26051,18771,18771,12488,22125,551,655,1528,22125,33716,2497,33716,7897,0,926,2784,895,11066,1575,11066,11066,10183,11066,11066,11066,11066	364,364,22678,22070,16200,0,0,22567,0,0,0,3170,0,0,0,0,0,13232,0,17753,0,4283,0,0,0,1618,0,1356,1098,0,0,0,0,0	3,2,1,1,1,1,-1,1,1,-1,-1,1,1,-1,-1,-1,-1,-1,-1,1,1,1,-1,-1,-1,-1,-1,-1,-1,-1,-1,-1,-1,-1
ENSG00000206654.1	chr1	39586612	39586715	-	104	0	0	0	0	0	0	0	0	0	0	0	0	RNU6-608P	ENSG00000206654.1	1	ENST00000383927.1	1	103	0	103	0	0	3
ENSG00000222378.1	chr1	39619836	39619968	-	133	0	0	0	0	0	0	0	0	0	0	0	0	RNA5SP44	ENSG00000222378.1	1	ENST00000410446.1	1	132	0	132	0	0	3
ENSG00000270040.1_5	chr1	39672184	39672629	+	446	5	3	2	2	4	1	2	0	0	10	4	11	RP11-416A14.1	ENSG00000270040.1_5	1	ENST00000602528.1_1	1	445	0	445	0	0	-1
ENSG00000226438.1_4	chr1	39715510	39723321	-	558	0	0	0	0	0	0	0	0	0	0	0	0	RP11-420K8.1	ENSG00000226438.1_4	1	ENST00000289890.7_1	3	555	7256	364	3940	0	5
ENSG00000217897.2_3	chr1	39769966	39770570	-	288	0	1	1	0	0	1	0	0	0	0	0	0	RP11-420K8.2	ENSG00000217897.2_3	1	ENST00000406997.2_1	2	286	318	254	318	0	4
ENSG00000183682.7_3	chr1	39957318	39991607	+	1692	3	1	1	1	0	2	0	0	2	1	1	0	BMP8A	ENSG00000183682.7_3	1	ENST00000331593.5_1	7	1685	32604	679	18849	1202	1
ENSG00000237624.1_3	chr1	39980628	39982162	+	1535	0	1	0	2	1	0	0	0	0	9	3	1	RP11-69E11.7	ENSG00000237624.1_3	1	ENST00000447263.1_1	1	1534	0	1534	0	0	-1
ENSG00000243970.2_3	chr1	39987952	40025343	-	3613	30	23	43	21	22	24	49	0	3	77	58	55	PPIEL	ENSG00000243970.2_3	11	ENST00000458207.5_1,ENST00000331856.7_2,ENST00000450157.6_2,ENST00000417869.6_2,ENST00000645296.1_1,ENST00000642822.1_1,ENST00000643783.1_1,ENST00000431553.6_2,ENST00000644305.1_1,ENST00000644158.1_1,ENST00000427240.2_2	5,12,11,11,10,12,10,10,11,12,7	688,2745,1134,1059,2346,2725,2398,1000,2328,1036,673	14314,34646,33239,33316,32075,31701,34642,36005,31923,31838,26196	225,1372,221,218,1372,1372,1372,154,1372,221,184	8027,12556,12556,12556,12556,12556,12556,12556,8027,12556,9761	0,0,0,0,0,0,0,0,0,0,0	7,14,13,13,12,14,12,12,13,14,9
ENSG00000090621.13_4	chr1	40026488	40042462	-	6782	2342	2480	3046	1963	1974	1659	2697	9	41	2880	3483	3428	PABPC4	ENSG00000090621.13_4	25	ENST00000482028.5_1,ENST00000492468.5_1,ENST00000437136.5_1,ENST00000468476.1_1,ENST00000372862.7_2,ENST00000372858.7_2,ENST00000372857.7_2,ENST00000372856.7_2,ENST00000530186.1_2,ENST00000421687.6_2,ENST00000484555.1_1,ENST00000525045.5_1,ENST00000527718.1_2,ENST00000477556.1_1,ENST00000461578.1_1,ENST00000483770.1_1,ENST00000525669.5_1,ENST00000470443.5_3,ENST00000513632.2_1,ENST00000525751.5_1…	2,4,7,2,15,16,16,15,2,14,3,4,6,2,2,3,4,8,2,4,6,3,2,3,2	631,2253,869,3590,2455,2737,3032,3001,350,1649,447,761,740,411,191,473,578,1204,736,552,585,314,321,895,530	563,969,2806,120,12982,12848,12896,12934,286,9148,1293,1026,4503,501,549,477,3893,9471,2373,1925,3008,2019,174,3502,319	325,1715,306,2203,494,642,985,992,235,272,288,476,272,306,126,309,272,272,657,241,139,139,194,464,295	563,563,1198,120,3173,3173,3173,3173,286,2373,1198,549,2373,501,549,333,2373,3173,2373,1095,1232,1095,174,3173,319	0,0,291,0,0,0,0,0,148,13,0,0,0,0,0,0,0,872,0,0,0,0,0,0,0	4,6,7,4,14,15,15,14,2,14,5,6,8,4,4,5,6,3,4,6,8,5,4,5,4
ENSG00000228060.1_4	chr1	40030832	40038875	+	551	0	0	0	0	0	0	0	0	0	0	0	0	RP11-69E11.8	ENSG00000228060.1_4	1	ENST00000415255.1_1	4	547	7496	223	5261	0	-1
ENSG00000201457.1	chr1	40033046	40033180	-	135	27	30	30	33	29	26	19	0	2	22	31	19	SNORA55	ENSG00000201457.1	1	ENST00000364587.1	1	134	0	134	0	0	3
ENSG00000163909.7_2	chr1	40089825	40105617	-	3661	2	2	2	1	0	1	7	0	0	12	6	9	HEYL	ENSG00000163909.7_2	1	ENST00000372852.3_1	5	3656	12136	3027	6831	0	5
ENSG00000225903.1_4	chr1	40099088	40099575	+	304	0	0	0	0	0	0	0	0	0	0	0	0	RP1-144F13.3	ENSG00000225903.1_4	1	ENST00000424418.1_1	2	302	185	214	185	0	-1
ENSG00000116981.3_2	chr1	40124793	40137710	-	1107	0	0	0	0	0	0	0	0	0	1	0	0	NT5C1A	ENSG00000116981.3_2	1	ENST00000235628.1_1	6	1101	11816	365	5668	0	6
ENSG00000116983.12_2	chr1	40144320	40157361	-	4962	0	0	0	0	0	0	0	0	1	0	0	0	HPCAL4	ENSG00000116983.12_2	3	ENST00000612703.3_1,ENST00000617690.2_1,ENST00000372844.7_1	3,5,4	4433,4753,4852	8404,8084,8189	4085,4085,4085	6695,6454,6695	0,0,0	3,5,4
ENSG00000084072.16_3	chr1	40157854	40229586	+	8071	237	336	322	366	267	265	306	0	56	256	382	366	PPIE	ENSG00000084072.16_3	15	ENST00000470018.5_1,ENST00000485507.5_1,ENST00000324379.9_1,ENST00000356511.6_1,ENST00000456578.6_1,ENST00000495526.5_1,ENST00000482751.5_1,ENST00000497370.5_3,ENST00000470213.5_1,ENST00000372835.9_1,ENST00000372830.5_1,ENST00000474804.5_3,ENST00000475350.5_3,ENST00000480169.1_1,ENST00000467741.2_1	8,4,10,10,3,10,9,9,8,7,11,8,10,7,4	939,779,1267,1069,612,4641,2555,904,919,835,1187,785,1203,884,622	52282,2823,13558,23960,2345,10187,12271,13247,13446,13708,23826,9399,13605,5624,2093	406,586,420,225,477,3392,1402,185,356,185,225,185,429,303,225	42880,1234,3822,10637,1242,3822,3822,3822,4979,3822,9465,3405,3822,1451,1038	0,0,896,881,0,115,0,0,619,746,935,112,108,0,0	5,-1,1,1,-1,1,-1,4,1,1,1,-1,-1,-1,-1
ENSG00000225333.6_4	chr1	40183700	40184267	+	568	0	0	0	0	0	0	0	0	0	1	0	0	RP1-144F13.4	ENSG00000225333.6_4	1	ENST00000497982.2_1	1	567	0	567	0	0	-1
ENSG00000252413.1	chr1	40189238	40189299	-	62	0	0	0	0	0	0	0	0	0	0	0	0	RNU7-121P	ENSG00000252413.1	1	ENST00000516604.1	1	61	0	61	0	0	3
ENSG00000116985.11_3	chr1	40222854	40254533	-	4822	44	41	37	29	22	12	45	0	14	79	38	48	BMP8B	ENSG00000116985.11_3	1	ENST00000372827.7_1	7	4815	26864	3386	13114	0	7
ENSG00000198754.5_3	chr1	40235195	40237020	-	1826	14	8	8	5	3	5	5	0	0	24	12	25	OXCT2	ENSG00000198754.5_3	1	ENST00000327582.5_1	1	1825	0	1825	0	-1549	1
ENSG00000261798.1_4	chr1	40254648	40255843	+	1196	7	4	3	2	3	1	3	0	0	1	4	2	RP1-118J21.25	ENSG00000261798.1_4	1	ENST00000566366.1_1	1	1195	0	1195	0	0	-1
ENSG00000229213.1_4	chr1	40261515	40261668	-	154	0	0	0	0	0	0	0	0	0	0	0	0	RP1-118J21.24	ENSG00000229213.1_4	1	ENST00000446772.1_1	1	153	0	153	0	0	3
ENSG00000284719.1_2	chr1	40265094	40275122	+	1744	0	0	0	0	1	0	0	0	0	0	0	0	RP1-118J21.27	ENSG00000284719.1_2	2	ENST00000641382.1_1,ENST00000641632.1_1	3,3	798,1095	5232,3834	574,511	4487,2970	0,0	-1,-1
ENSG00000284678.1_2	chr1	40267086	40283132	-	673	0	0	0	0	0	0	0	0	0	0	0	0	RP1-118J21.28	ENSG00000284678.1_2	1	ENST00000641026.1_1	4	669	15377	317	7570	0	6
ENSG00000043514.15_2	chr1	40306694	40349183	-	2663	514	495	710	661	519	494	471	2	1	477	594	531	TRIT1	ENSG00000043514.15_2	15	ENST00000537440.5_1,ENST00000441669.6_2,ENST00000462797.5_1,ENST00000316891.9_1,ENST00000372818.5_2,ENST00000495175.6_1,ENST00000491865.5_1,ENST00000541099.5_1,ENST00000465417.5_1,ENST00000492612.6_1,ENST00000467774.1_1,ENST00000489945.5_1,ENST00000486825.6_1,ENST00000469476.2_1,ENST00000462243.2_1	10,9,10,11,10,8,5,4,5,9,2,7,8,6,3	2016,1842,1990,2101,2024,1148,733,541,494,974,462,854,842,767,547	40466,40598,40463,40354,40431,40737,41102,41179,5770,38311,251,35422,35352,9038,4303	891,862,862,862,862,287,268,199,117,163,253,178,157,153,318	25901,30442,25901,25901,25901,33057,36021,38678,2580,25901,251,25901,18645,3209,3209	0,0,0,0,0,0,0,0,0,558,0,0,602,261,0	10,9,9,11,10,2,7,4,7,4,4,4,3,5,5
ENSG00000202222.1	chr1	40347238	40347350	-	113	22	10	17	12	17	20	14	0	0	31	29	35	Y_RNA	ENSG00000202222.1	1	ENST00000365352.1	1	112	0	112	0	0	3
ENSG00000116990.10_3	chr1	40361098	40367928	-	5063	12	18	20	24	11	9	12	0	5	126	68	55	MYCL	ENSG00000116990.10_3	4	ENST00000397332.2_1,ENST00000372816.2_1,ENST00000372815.1_1,ENST00000450953.3_3	3,2,2,2	3253,1686,1942,424	3334,2969,365,698	2544,943,1831,309	2969,2969,365,698	0,0,0,0	3,2,2,4
ENSG00000236546.1_4	chr1	40363417	40364770	+	785	0	0	0	0	1	0	0	0	0	1	2	1	RP1-118J21.5	ENSG00000236546.1_4	1	ENST00000418255.1_1	2	783	570	462	570	0	-1
ENSG00000207356.1	chr1	40410562	40410670	-	109	0	0	0	0	0	0	0	0	0	0	0	0	Y_RNA	ENSG00000207356.1	1	ENST00000384626.1	1	108	0	108	0	0	3
ENSG00000168389.17_3	chr1	40420784	40435640	+	4007	3	1	3	4	4	1	2	0	2	25	6	6	MFSD2A	ENSG00000168389.17_3	10	ENST00000420632.6_1,ENST00000372811.9_1,ENST00000434861.5_3,ENST00000372809.5_1,ENST00000483824.5_1,ENST00000469745.5_1,ENST00000480630.5_1,ENST00000491515.5_1,ENST00000459917.1_1,ENST00000481612.1_1	12,14,7,14,12,8,9,6,3,2	1902,2140,939,2159,1917,915,2423,787,680,903	12954,12696,10606,12657,12891,8433,3332,1243,510,92	463,461,233,461,461,157,1123,288,433,858	9826,6386,6386,6386,6386,6386,937,459,418,92	1114,1579,0,1618,0,0,0,0,0,0	2,1,1,1,-1,-1,-1,-1,-1,-1
ENSG00000228477.1_4	chr1	40428352	40429076	+	725	2	2	7	1	0	1	2	0	0	3	1	4	RP3-342P20.2	ENSG00000228477.1_4	1	ENST00000438210.1_1	1	724	0	724	0	0	-1
ENSG00000131236.16_3	chr1	40505905	40538321	+	3814	6442	8751	6272	6249	8160	8429	5363	12	25	6804	9531	9653	CAP1	ENSG00000131236.16_3	19	ENST00000372797.7_2,ENST00000372802.5_2,ENST00000449311.5_3,ENST00000421589.5_3,ENST00000414893.5_2,ENST00000414281.5_3,ENST00000420216.5_3,ENST00000372792.6_2,ENST00000372798.5_2,ENST00000340450.7_2,ENST00000372805.7_2,ENST00000435719.5_3,ENST00000427843.5_3,ENST00000417287.5_3,ENST00000424977.1_3,ENST00000446031.1_2,ENST00000479759.5_1,ENST00000461993.1_1,ENST00000494114.1_1	13,13,6,7,6,8,8,13,13,13,13,8,9,8,8,3,7,5,2	3092,2951,675,817,522,764,660,1483,1550,2579,2204,809,730,602,694,270,881,851,742	29324,29324,23560,24900,28522,24818,24836,29303,29306,29309,29306,26126,26059,24836,24821,18978,3430,1228,471	1199,1065,144,200,177,143,143,184,184,1191,821,160,143,143,143,124,184,308,509	18554,18551,18867,18551,18536,17841,17841,18533,18533,18536,18536,18554,17844,16645,17844,18369,1973,471,471	1416,1413,0,0,0,0,0,1416,1413,1413,1416,0,0,0,0,0,0,0,0	2,2,2,2,2,3,3,2,2,2,2,2,3,3,3,2,-1,-1,-1
ENSG00000131238.17_4	chr1	40537133	40563399	-	5088	7362	8339	6677	5807	6742	6142	4150	11	36	4292	5250	5370	PPT1	ENSG00000131238.17_4	19	ENST00000642050.1_2,ENST00000641471.1_1,ENST00000530076.6_3,ENST00000641083.1_1,ENST00000530704.6_2,ENST00000433473.8_3,ENST00000641319.1_1,ENST00000439754.6_2,ENST00000641236.1_1,ENST00000641691.1_1,ENST00000449045.7_2,ENST00000529905.5_1,ENST00000641381.1_1,ENST00000372775.2_1,ENST00000641924.1_1,ENST00000527311.7_2,ENST00000372779.9_2,ENST00000526547.2_2,ENST00000641548.1_1	9,10,5,9,9,9,10,8,8,9,6,10,4,4,5,7,6,5,5	4001,2358,1867,2344,2331,2258,2378,2187,2473,2244,1951,1826,614,559,545,631,582,726,502	22265,22179,7742,22153,22195,22268,22150,22336,22039,22272,22571,22481,16973,4460,22673,22494,16216,6991,7234	2722,1473,1471,1464,1457,1457,1457,1454,1445,1445,1445,519,397,367,159,137,134,403,137	8923,8923,2659,8923,8923,8923,8923,8923,8923,8923,8923,8923,12497,2659,16628,10842,8923,4302,4615	0,0,0,1384,0,0,0,0,0,0,0,0,384,0,0,0,0,623,0	9,10,5,9,5,9,9,8,10,2,6,9,4,6,2,9,2,1,2
ENSG00000226745.2_4	chr1	40598436	40599120	+	685	0	0	0	0	0	0	0	0	0	0	0	0	RP11-115D7.3	ENSG00000226745.2_4	1	ENST00000430724.2_1	1	684	0	684	0	0	-1
ENSG00000117000.8_2	chr1	40627045	40706593	+	6246	1909	2535	2376	2353	1865	1843	1598	5	12	2324	2558	2575	RLF	ENSG00000117000.8_2	1	ENST00000372771.4_1	8	6238	73310	5129	27419	5737	1
ENSG00000207508.1	chr1	40643515	40643621	+	107	4	3	4	7	6	2	5	0	0	7	9	7	RNU6-1237P	ENSG00000207508.1	1	ENST00000384777.1	1	106	0	106	0	0	-1
ENSG00000188800.5_2	chr1	40711619	40717363	+	889	2	0	1	1	2	1	0	0	16	5	4	6	TMCO2	ENSG00000188800.5_2	2	ENST00000468258.1_1,ENST00000372766.3_1	3,2	548,737	5188,3053	400,408	3835,3053	0,547	-1,1
ENSG00000259943.1_4	chr1	40722099	40723639	-	1541	254	271	219	226	165	163	181	0	2	170	214	200	RP1-39G22.7	ENSG00000259943.1_4	1	ENST00000567508.1_1	1	1540	0	1540	0	0	3
ENSG00000084073.8_2	chr1	40723779	40759856	+	3572	5019	5301	4976	4467	4588	4359	2332	14	27	2894	3331	3288	ZMPSTE24	ENSG00000084073.8_2	4	ENST00000372759.3_1,ENST00000479131.5_1,ENST00000472583.1_1,ENST00000474142.1_1	10,4,4,2	3098,557,533,528	32979,4112,9064,1448	1739,182,182,352	9308,1849,6801,1448	1418,0,0,0	1,-1,-1,-1
ENSG00000231296.1_4	chr1	40728344	40728656	-	313	0	0	0	0	0	0	0	0	0	0	0	0	RP1-39G22.4	ENSG00000231296.1_4	1	ENST00000447743.1_1	1	312	0	312	0	0	3
ENSG00000049089.14_4	chr1	40766159	40783485	-	4217	685	547	668	483	624	520	620	4	154	620	808	806	COL9A2	ENSG00000049089.14_4	12	ENST00000372748.7_2,ENST00000482722.5_1,ENST00000466267.1_1,ENST00000427563.1_2,ENST00000488463.6_2,ENST00000417105.6_3,ENST00000496215.5_1,ENST00000372736.3_1,ENST00000461118.6_2,ENST00000642679.1_1,ENST00000490132.1_1,ENST00000495948.1_1	32,31,11,7,14,14,11,4,9,6,3,2	2830,2856,824,541,829,663,657,315,1146,489,489,421	13977,13864,2361,1339,4498,5737,4545,5281,4437,3016,306,1459	894,713,188,188,200,74,171,144,249,259,225,271	1693,1693,732,721,1421,1421,1421,3478,1459,1421,181,1459	0,0,0,0,0,0,0,0,0,0,0,0	32,33,13,9,16,16,13,6,11,8,5,4
ENSG00000227311.3_4	chr1	40798750	40799229	-	480	0	2	3	0	0	1	1	0	0	1	0	0	RP1-228H13.1	ENSG00000227311.3_4	1	ENST00000600955.1_1	1	479	0	479	0	0	3
ENSG00000084070.11_3	chr1	40810522	40888998	+	3631	798	838	967	712	783	727	823	2	17	558	750	732	SMAP2	ENSG00000084070.11_3	6	ENST00000435168.6_1,ENST00000372718.7_1,ENST00000372708.5_1,ENST00000614549.4_1,ENST00000539317.2_1,ENST00000487871.1_1	7,10,10,10,10,2	659,2929,2463,2560,2491,360	68731,46700,46215,27419,24033,1032	136,1350,1350,1348,1348,263	44300,32513,32028,13232,9846,1032	0,1280,1190,1265,1042,0	2,1,1,1,3,-1
ENSG00000213172.3_4	chr1	40830438	40830855	+	418	0	0	0	0	0	0	0	0	0	0	0	0	RP1-228H13.2	ENSG00000213172.3_4	1	ENST00000392713.3_1	1	417	0	417	0	0	-1
ENSG00000284677.1_2	chr1	40901871	40915711	-	673	0	2	1	0	1	1	0	0	1	2	0	0	RP1-228H13.6	ENSG00000284677.1_2	1	ENST00000642138.1_1	5	668	13172	249	11254	0	7
ENSG00000187801.14_2	chr1	40915774	40929390	+	2386	286	372	324	274	242	198	218	0	7	459	308	309	ZFP69B	ENSG00000187801.14_2	4	ENST00000469416.1_1,ENST00000484445.5_1,ENST00000411995.6_1,ENST00000361584.4_1	5,5,6,5	2377,1971,2103,2024	11235,11602,11508,11027	1293,1259,1297,1295	4982,5857,4982,4982	0,392,1600,1600	-1,2,2,1
ENSG00000260920.2_4	chr1	40929991	40932439	+	2449	115	133	141	101	108	86	82	0	0	207	142	142	RP1-228H13.5	ENSG00000260920.2_4	1	ENST00000565390.2_1	1	2448	0	2448	0	0	-1
ENSG00000279667.1_4	chr1	40938727	40939731	+	1005	1	0	0	1	0	0	0	0	0	0	0	1	RP11-656D10.7	ENSG00000279667.1_4	1	ENST00000624658.1_1	1	1004	0	1004	0	0	-1
ENSG00000187815.9_2	chr1	40942887	40962015	+	3248	170	209	256	269	159	164	195	0	3	172	196	192	ZFP69	ENSG00000187815.9_2	3	ENST00000372706.5_1,ENST00000372705.3_1,ENST00000482712.1_1	6,6,3	2865,2098,539	16263,16560,1471	1422,1367,376	7234,7234,1156	1576,1576,0	2,2,-1
ENSG00000238287.1_4	chr1	40958829	40974333	-	605	34	31	47	29	35	40	34	0	1	33	30	32	RP11-656D10.3	ENSG00000238287.1_4	1	ENST00000450713.1_1	2	603	14901	531	14901	0	4
ENSG00000164002.11_4	chr1	40974413	40982228	+	3092	382	471	524	467	392	328	399	0	90	291	447	430	EXO5	ENSG00000164002.11_4	10	ENST00000358527.6_1,ENST00000372703.1_1,ENST00000420209.1_1,ENST00000296380.8_1,ENST00000432259.5_3,ENST00000418186.1_2,ENST00000415550.5_2,ENST00000443729.5_3,ENST00000419161.1_3,ENST00000471429.1_1	4,2,2,3,4,2,4,3,2,2	1888,2565,861,2214,684,803,861,938,854,372	5407,4725,5607,5581,5395,5638,5376,5550,5626,5166	1521,1522,707,2041,331,701,512,771,771,264	4725,4725,5607,4725,4725,5638,4725,4725,5626,5166	1121,1121,0,1121,0,0,0,0,0,0	4,2,2,3,4,2,4,3,2,-1
ENSG00000227278.1_4	chr1	40980133	40980729	-	432	0	0	0	0	1	0	0	0	0	1	0	2	RP11-656D10.5	ENSG00000227278.1_4	1	ENST00000453437.1_1	2	430	166	257	166	0	4
ENSG00000238186.1_4	chr1	40981426	40982846	-	546	1	0	0	0	0	0	0	0	0	1	2	2	RP11-656D10.6	ENSG00000238186.1_4	1	ENST00000437060.1_1	2	544	876	365	876	0	4
ENSG00000117010.15_2	chr1	40997233	41013841	+	3039	299	392	329	304	273	302	316	0	35	376	402	406	ZNF684	ENSG00000117010.15_2	6	ENST00000372699.7_1,ENST00000465152.1_1,ENST00000372697.7_1,ENST00000372696.3_1,ENST00000493756.1_1,ENST00000472043.1_1	5,4,5,5,3,2	2092,558,1023,1004,1326,542	14516,14554,12351,12370,14737,4852	1607,203,640,621,1223,396	7405,8799,7405,7405,13381,4852	1133,0,356,275,0,0	2,-1,2,2,-1,-1
ENSG00000236505.1_4	chr1	41029206	41029331	+	126	0	2	0	0	0	0	1	0	0	0	0	0	RP1-63P18.2	ENSG00000236505.1_4	1	ENST00000414105.1_1	1	125	0	125	0	0	-1
ENSG00000233910.1_3	chr1	41059305	41060025	-	721	0	0	0	0	0	0	0	0	0	1	0	0	RP4-739H11.1	ENSG00000233910.1_3	1	ENST00000445825.1_1	1	720	0	720	0	0	3
ENSG00000117016.9_2	chr1	41086351	41131329	-	7235	409	456	375	302	408	340	490	0	5	220	313	288	RIMS3	ENSG00000117016.9_2	2	ENST00000372684.7_1,ENST00000372683.1_1	8,8	7227,1400	37751,37831	6050,515	17552,17632	0,0	8,8
ENSG00000237899.1_4	chr1	41134761	41153260	-	471	5	0	7	9	5	3	5	0	35	6	11	15	RP4-739H11.3	ENSG00000237899.1_4	1	ENST00000440100.1_1	5	466	18033	180	8037	0	7
ENSG00000272145.1_4	chr1	41156052	41157738	-	1687	181	191	195	183	106	134	158	0	2	112	202	188	RP4-739H11.4	ENSG00000272145.1_4	1	ENST00000606277.1_1	1	1686	0	1686	0	0	3
ENSG00000066136.20_3	chr1	41157320	41237275	+	5990	1122	1295	1484	1029	1046	896	1368	3	218	1204	1773	1903	NFYC	ENSG00000066136.20_3	24	ENST00000467203.5_1,ENST00000424419.6_1,ENST00000427410.6_1,ENST00000447388.7_1,ENST00000425457.6_1,ENST00000453631.5_1,ENST00000456393.6_1,ENST00000372654.5_1,ENST00000534399.5_1,ENST00000372653.5_1,ENST00000372669.8_1,ENST00000372652.5_2,ENST00000372651.5_2,ENST00000531464.5_2,ENST00000440226.7_1,ENST00000525290.5_1,ENST00000530965.5_2,ENST00000416859.6_3,ENST00000308733.9_2,ENST00000414185.1_2…	6,5,9,10,11,6,10,11,5,15,9,10,10,5,10,5,3,5,10,5,3,3,2,2	937,1271,1370,1940,1525,644,1901,1444,569,1847,996,2353,1192,520,1707,428,290,542,2148,672,579,261,1479,1963	65863,74286,78067,77954,77898,60885,77957,77820,55007,77246,73401,59893,60205,14208,34071,18897,14090,23583,30617,17718,8150,580,982,908	327,647,417,894,430,150,889,393,192,397,173,1206,231,185,435,114,113,173,1206,219,341,141,769,1278	46969,46969,46969,46969,46969,31822,46969,26015,31008,16653,46489,29220,29220,8586,8586,8586,10625,8586,8586,4875,4594,365,982,908	0,0,886,999,1055,0,996,999,0,897,0,1311,999,0,999,0,0,0,1367,554,0,0,0,0	-1,-1,2,2,2,3,2,3,4,7,2,2,2,3,2,1,1,1,1,-1,-1,-1,-1,-1
ENSG00000198974.1	chr1	41220027	41220118	+	92	7	12	7	8	7	2	7	0	0	8	7	7	MIR30E	ENSG00000198974.1	1	ENST00000362104.1	1	91	0	91	0	0	-1
ENSG00000207962.1	chr1	41222956	41223044	+	89	7	2	4	2	5	3	10	0	0	7	5	9	MIR30C1	ENSG00000207962.1	1	ENST00000385227.1	1	88	0	88	0	0	-1
ENSG00000117013.15_3	chr1	41249486	41306124	+	4381	3	8	0	0	1	0	3	0	0	1	0	0	KCNQ4	ENSG00000117013.15_3	5	ENST00000642618.1_1,ENST00000347132.9_1,ENST00000509682.6_2,ENST00000443478.3_3,ENST00000506017.1_1	14,14,13,13,11	4283,4085,1913,2422,3324	52355,52355,52516,19602,18163	2141,2141,313,978,2140	32858,32858,32858,4390,6826	2074,2074,1913,1656,0	1,1,1,-1,-1
ENSG00000264582.1	chr1	41270518	41270811	+	294	0	0	2	0	1	0	0	0	0	1	0	0	RN7SL326P	ENSG00000264582.1	1	ENST00000477493.2	1	293	0	293	0	0	-1
ENSG00000179862.6_2	chr1	41326723	41328038	-	1316	73	64	92	68	55	42	109	0	26	104	137	100	CITED4	ENSG00000179862.6_2	1	ENST00000372638.3_1	1	1315	0	1315	0	-550	1
ENSG00000229528.1_4	chr1	41329586	41342342	+	471	1	0	0	1	0	0	0	0	0	0	0	0	RP5-1066H13.4	ENSG00000229528.1_4	1	ENST00000414199.1_1	3	468	12288	227	12072	0	-1
ENSG00000228940.1_4	chr1	41403776	41405435	-	921	3	6	12	5	1	1	4	0	0	0	3	4	RP11-348A7.1	ENSG00000228940.1_4	1	ENST00000413739.1_1	3	918	741	474	450	0	5
ENSG00000233118.2_3	chr1	41407923	41408187	-	265	0	0	0	0	0	0	0	0	0	0	0	0	RP11-348A7.2	ENSG00000233118.2_3	1	ENST00000437166.2_1	1	264	0	264	0	0	3
ENSG00000171793.13_2	chr1	41445007	41478237	+	5462	1462	1725	2510	1805	1687	1348	1764	4	12	1524	2028	2091	CTPS1	ENSG00000171793.13_2	12	ENST00000372621.8_1,ENST00000470271.5_1,ENST00000475060.1_1,ENST00000479480.5_1,ENST00000372616.1_1,ENST00000480420.5_1,ENST00000463285.5_1,ENST00000486889.1_1,ENST00000497210.5_1,ENST00000464283.5_1,ENST00000463423.5_1,ENST00000498694.1_1	19,3,2,7,18,6,6,3,3,8,6,5	3182,798,811,770,2019,744,733,565,460,635,451,594	30048,4082,2049,9124,26599,11873,7537,4546,1903,7415,6647,5096	907,453,644,178,295,213,269,401,304,144,144,231	4072,2717,2049,2455,4072,4072,3503,3503,1043,2875,2875,2565	1759,0,0,0,1759,0,0,0,0,0,0,0	2,-1,-1,-1,1,-1,-1,-1,-1,-1,-1,-1
ENSG00000281207.1_4	chr1	41480262	41509562	+	4800	118	113	178	106	129	86	138	1	42	156	125	183	SLFNL1-AS1	ENSG00000281207.1_4	1	ENST00000626479.1_1	4	4796	24504	3811	10132	0	-1
ENSG00000171790.15_3	chr1	41481269	41488909	-	4310	11	13	25	19	18	20	27	0	0	19	13	14	SLFNL1	ENSG00000171790.15_3	5	ENST00000302946.12_1,ENST00000372613.6_2,ENST00000439569.2_1,ENST00000372611.5_1,ENST00000359345.5_1	5,3,6,6,4	1946,2651,2111,1859,4306	4172,3477,4017,4287,3334	631,1499,631,631,3011	2070,2070,2070,2247,2070	0,0,0,0,0	5,3,6,6,4
ENSG00000010803.16_3	chr1	41492872	41707826	-	4447	1252	1356	2173	1708	1586	1425	1862	2	8	1159	1715	1709	SCMH1	ENSG00000010803.16_3	17	ENST00000397174.6_3,ENST00000402904.6_1,ENST00000397171.6_1,ENST00000361191.9_1,ENST00000361705.7_2,ENST00000326197.11_3,ENST00000372595.5_1,ENST00000337495.9_3,ENST00000372597.5_2,ENST00000372596.5_1,ENST00000472037.5_1,ENST00000456518.3_1,ENST00000460215.5_1,ENST00000498793.5_1,ENST00000489421.1_1,ENST00000482530.1_1,ENST00000488592.1_1	13,15,14,12,13,15,15,15,15,16,5,9,3,4,4,4,2	2964,3189,3172,2894,3102,3260,3216,3093,3237,3307,730,1577,444,579,683,570,361	122510,131044,131109,131387,131179,130436,132599,211815,211677,211607,9518,130102,16808,17448,10715,28639,55809	1119,1119,1119,1119,1119,1117,1117,1117,1117,1117,271,234,179,251,254,200,266	37832,37832,37832,37832,37832,37832,37832,55809,55809,55809,5257,67427,8636,8877,4853,21705,55809	0,0,0,0,0,0,0,0,0,0,310,0,0,0,0,0,0	13,15,14,12,13,15,15,15,15,16,4,9,5,6,6,6,4
ENSG00000215893.3_3	chr1	41564310	41564808	+	499	0	0	0	0	0	0	0	0	1	0	2	0	RP4-635E8.1	ENSG00000215893.3_3	1	ENST00000401064.3_1	1	498	0	498	0	0	-1
ENSG00000235358.1_4	chr1	41708045	41750533	+	1468	19	12	23	12	20	18	26	0	0	11	17	15	RP11-399E6.1	ENSG00000235358.1_4	3	ENST00000425554.1_1,ENST00000445073.1_1,ENST00000422305.1_1	3,2,3	620,707,511	21565,41579,3261	333,576,267	18037,41579,2968	0,0,0	-1,-1,-1
ENSG00000213987.4_4	chr1	41730222	41730534	-	313	0	0	0	0	0	0	0	0	0	0	0	0	RP11-399E6.2	ENSG00000213987.4_4	1	ENST00000427711.2_1	1	312	0	312	0	0	3
ENSG00000204060.7_4	chr1	41827594	41849262	+	2398	2	0	1	1	0	0	1	0	3	3	4	2	FOXO6	ENSG00000204060.7_4	2	ENST00000372591.1_3,ENST00000641094.1_1	2,3	2396,1473	19272,19274	1974,584	19272,19272	0,0	-1,1
ENSG00000229901.1_4	chr1	41840676	41841341	-	394	0	0	0	0	0	0	0	0	0	0	0	0	RP11-399E6.4	ENSG00000229901.1_4	1	ENST00000429109.1_1	2	392	273	248	273	0	4
ENSG00000252563.1	chr1	41932608	41932699	-	92	0	0	0	0	0	0	0	0	0	0	0	0	RNA5SP45	ENSG00000252563.1	1	ENST00000516754.1	1	91	0	91	0	0	3
ENSG00000127129.9_2	chr1	41944446	41950344	-	1639	0	0	0	0	0	0	0	0	0	0	0	1	EDN2	ENSG00000127129.9_2	5	ENST00000372587.4_1,ENST00000490783.5_1,ENST00000467046.5_1,ENST00000467872.5_1,ENST00000460255.1_1	5,5,5,5,5	1236,795,427,357,480	4660,4751,4204,4274,4151	727,375,168,122,174	1593,1593,2964,1593,1459	0,0,0,0,0	5,7,7,7,7
ENSG00000127124.15_4	chr1	41972036	42501596	-	14410	2	0	0	1	3	2	1	0	1	1	0	1	HIVEP3	ENSG00000127124.15_4	7	ENST00000643665.1_1,ENST00000372583.5_1,ENST00000372584.5_2,ENST00000460604.1_1,ENST00000491442.5_1,ENST00000489103.5_1,ENST00000479350.1_1	8,9,8,5,3,4,5	12208,12184,12311,2364,1728,1701,935	143752,399949,400031,67306,69750,187033,20747	5581,5581,5581,1036,1254,1254,497	50634,217418,289466,57056,69324,117283,15489	0,0,0,0,0,0,0	8,9,8,7,5,6,7
ENSG00000230881.1_4	chr1	42001114	42001539	+	265	0	0	0	0	0	0	0	0	0	0	0	0	RP11-486B10.3	ENSG00000230881.1_4	1	ENST00000440249.1_1	2	263	162	182	162	0	-1
ENSG00000230638.4_4	chr1	42007740	42009981	+	2242	0	0	0	0	0	0	0	0	1	0	0	0	RP11-486B10.4	ENSG00000230638.4_4	1	ENST00000434240.2_1	1	2241	0	2241	0	0	-1
ENSG00000284895.1_1	chr1	42050977	42094487	-	81	0	0	0	0	0	0	0	0	0	0	0	0	RP11-486B10.5	ENSG00000284895.1_1	1	ENST00000646142.1_1	2	79	43431	67	43431	0	2
ENSG00000264896.1	chr1	42224812	42224898	+	87	0	0	0	0	0	0	0	0	0	0	0	0	AL451006.1	ENSG00000264896.1	1	ENST00000390764.2	1	86	0	86	0	0	-1
ENSG00000227538.1_3	chr1	42506268	42507400	+	1133	0	0	0	0	0	0	0	0	0	0	0	0	RP1-21K4.1	ENSG00000227538.1_3	1	ENST00000391730.2_1	1	1132	0	1132	0	0	-1
ENSG00000228776.2_4	chr1	42606306	42607062	+	454	0	0	0	0	0	0	0	0	0	0	0	0	RP11-319C21.1	ENSG00000228776.2_4	1	ENST00000434936.2_1	2	452	304	392	304	0	-1
ENSG00000044012.3_2	chr1	42619092	42621495	+	597	0	0	0	0	0	0	0	0	0	4	0	1	GUCA2B	ENSG00000044012.3_2	1	ENST00000372581.1_1	3	594	1809	289	1140	336	1
ENSG00000197273.3_2	chr1	42628362	42630389	-	569	19	14	0	2	1	0	1	0	0	109	124	148	GUCA2A	ENSG00000197273.3_2	1	ENST00000357001.2_1	3	566	1461	279	1028	0	3
ENSG00000198815.8_4	chr1	42642210	42801548	-	6893	1459	1541	1514	1068	1376	1200	1324	4	61	1776	1589	1585	FOXJ3	ENSG00000198815.8_4	9	ENST00000372571.5_1,ENST00000372572.5_3,ENST00000372573.5_2,ENST00000545068.5_2,ENST00000361776.5_2,ENST00000361346.5_2,ENST00000445886.5_2,ENST00000422278.1_1,ENST00000454417.1_1	3,15,13,13,12,13,8,3,2	4465,5337,5296,5152,5094,5212,1318,444,497	8805,153089,154042,133762,153576,153475,142497,10570,13159	3286,3286,3286,3280,3280,3280,324,249,258	6713,37149,37149,37149,37149,37149,37149,6532,13159	0,0,0,0,0,0,0,0,123	3,15,13,13,12,13,10,5,2
ENSG00000227527.2_5	chr1	42801057	42804047	-	661	1	1	1	1	1	3	0	0	0	0	1	1	RP11-223A3.1	ENSG00000227527.2_5	1	ENST00000436207.2_1	2	659	2331	450	2331	0	4
ENSG00000177181.14_3	chr1	42846466	42888249	+	8981	188	266	323	337	227	198	143	0	6	216	263	252	RIMKLA	ENSG00000177181.14_3	2	ENST00000410070.6_3,ENST00000431473.3_1	5,5	859,8904	28511,32868	302,8094	15343,18307	0,1171	3,1
ENSG00000235002.1_4	chr1	42878069	42878465	-	397	0	0	0	0	0	0	0	0	0	0	0	0	RP11-157D18.2	ENSG00000235002.1_4	1	ENST00000411908.1_1	1	396	0	396	0	0	3
ENSG00000066185.12_2	chr1	42896000	42921938	-	2195	7	11	3	11	7	6	2	0	0	5	11	9	ZMYND12	ENSG00000066185.12_2	4	ENST00000372565.7_1,ENST00000611861.4_1,ENST00000475426.1_1,ENST00000461083.1_1	8,7,2,3	1767,1496,676,414	24171,24342,1986,19176	529,443,428,169	8442,9893,1986,15863	0,0,0,0	8,3,4,2
ENSG00000127125.8_3	chr1	42921788	42939056	+	2590	612	716	750	725	649	664	783	1	274	624	724	804	PPCS	ENSG00000127125.8_3	8	ENST00000372562.1_1,ENST00000372560.3_1,ENST00000472013.1_1,ENST00000372561.3_1,ENST00000372556.3_1,ENST00000471420.1_1,ENST00000482168.1_1,ENST00000469615.1_1	3,2,2,3,3,3,2,2	963,791,1615,1428,981,638,686,776	3001,174,2253,2427,2872,15946,2036,298	478,534,809,811,811,272,413,675	2253,174,2253,2253,2253,15772,2036,298	415,640,0,933,168,0,0,0	2,1,-1,1,1,-1,-1,-1
ENSG00000186409.15_4	chr1	42929001	43120335	+	13504	65	57	60	58	49	46	71	0	18	153	71	89	CCDC30	ENSG00000186409.15_4	14	ENST00000475614.6_1,ENST00000477155.5_1,ENST00000340612.5_2,ENST00000468651.1_1,ENST00000492422.1_1,ENST00000462063.1_1,ENST00000428554.6_1,ENST00000495044.5_1,ENST00000507855.5_2,ENST00000509712.6_2,ENST00000471390.5_2,ENST00000342022.8_1,ENST00000514642.1_1,ENST00000471699.1_1	3,23,21,2,2,3,20,6,15,11,17,16,5,3	998,3630,3579,526,733,359,3043,2015,2430,1555,2542,3082,6822,388	18668,187202,187407,9465,8905,5282,168482,53276,161827,82750,117769,116693,52178,8639	560,368,522,295,438,263,363,1509,368,249,372,846,6252,162	16571,35973,37560,9465,8905,4404,35973,35973,45040,30686,26147,26147,29695,7807	0,1436,2800,0,0,0,2337,0,0,268,0,2337,0,0	-1,14,2,-1,-1,-1,6,-1,-1,-1,-1,2,-1,-1
ENSG00000230116.1_4	chr1	42957410	42958164	+	755	0	0	0	1	1	1	1	0	0	0	0	0	RP11-163G10.2	ENSG00000230116.1_4	1	ENST00000426743.1_1	1	754	0	754	0	0	-1
ENSG00000236876.3_3	chr1	42965876	42966010	-	135	0	0	0	0	0	0	0	0	0	0	0	0	RP11-163G10.3	ENSG00000236876.3_3	1	ENST00000424567.1_1	1	134	0	134	0	0	3
ENSG00000200254.1	chr1	43034704	43034810	+	107	0	0	0	0	0	0	0	0	0	0	0	0	RNU6-536P	ENSG00000200254.1	1	ENST00000363384.1	1	106	0	106	0	0	-1
ENSG00000236180.2_4	chr1	43036641	43037061	+	421	0	0	3	1	0	0	0	0	0	0	1	1	RP11-163G10.4	ENSG00000236180.2_4	1	ENST00000454425.2_1	1	420	0	420	0	0	-1
ENSG00000171960.10_3	chr1	43124096	43142429	+	1444	382	523	673	726	359	363	430	0	3	265	487	474	PPIH	ENSG00000171960.10_3	6	ENST00000304979.7_1,ENST00000372550.5_2,ENST00000440068.5_3,ENST00000372549.1_1,ENST00000436387.1_3,ENST00000461351.1_3	10,9,9,2,2,6	742,656,660,325,414,521	17591,8328,8225,320,1296,11374	174,142,222,188,321,174	9144,3959,3959,320,1296,7848	525,398,0,172,0,287	1,3,2,1,1,-1
ENSG00000234917.2_4	chr1	43144406	43147330	+	601	6	7	23	16	8	3	16	0	0	10	9	5	RP5-994D16.3	ENSG00000234917.2_4	1	ENST00000414339.2_1	2	599	2325	465	2325	0	-1
ENSG00000065978.18_3	chr1	43148098	43168020	+	1930	12613	21825	19821	18598	15324	14471	12462	32	43	8717	14464	15326	YBX1	ENSG00000065978.18_3	4	ENST00000321358.11_1,ENST00000332220.10_3,ENST00000436427.1_3,ENST00000467957.1_1	8,5,7,5	1506,771,1517,765	18416,14051,17845,13290	368,302,378,310	10024,10024,10125,10024	968,0,1118,0	1,1,-1,-1
ENSG00000164007.10_3	chr1	43198764	43205925	-	3602	121	138	322	233	176	159	406	1	6	155	345	340	CLDN19	ENSG00000164007.10_3	3	ENST00000296387.5_2,ENST00000539749.5_1,ENST00000372539.3_2	5,3,4	2854,3514,1582	4307,3647,3563	2041,2937,1035	2199,2391,2199	0,0,0	5,3,4
ENSG00000117385.15_3	chr1	43212006	43232755	-	6766	2851	2709	3095	2564	2823	2910	2228	7	166	1717	2159	2168	P3H1	ENSG00000117385.15_3	14	ENST00000397054.7_2,ENST00000460031.5_1,ENST00000236040.8_2,ENST00000495874.5_1,ENST00000296388.9_2,ENST00000462474.5_1,ENST00000472802.1_1,ENST00000431412.3_1,ENST00000460831.1_1,ENST00000481465.3_1,ENST00000447502.2_1,ENST00000463465.1_1,ENST00000372526.2_1,ENST00000492956.1_1	15,14,14,15,15,3,2,8,2,4,4,6,3,2	2690,2712,2979,2798,2570,578,644,828,583,724,449,891,651,2999	18059,17903,17658,17849,18078,712,401,6658,402,4311,2813,6532,7094,4032	577,482,1037,515,516,344,323,150,543,435,127,237,495,2489	4032,4032,4032,4032,4032,401,401,2205,402,2205,2205,2930,4161,4032	0,0,0,0,0,0,0,170,0,0,0,0,0,0	15,16,14,17,15,5,4,7,4,6,6,8,5,4
ENSG00000164008.15_4	chr1	43232940	43245159	+	5263	511	638	676	493	607	508	454	0	295	442	544	634	C1orf50	ENSG00000164008.15_4	3	ENST00000372525.6_2,ENST00000468913.2_2,ENST00000494155.1_1	5,4,2	4732,585,495	7487,5165,1088	4279,219,462	5939,3736,1088	595,0,0	1,-1,-1
ENSG00000283580.2_4	chr1	43232963	43260164	+	1345	288	391	367	274	326	324	216	0	8	236	305	368	RP5-994D16.12	ENSG00000283580.2_4	2	ENST00000464081.1_2,ENST00000603943.6_3	6,5	819,1003	26382,21625	270,318	17326,14274	127,328	1,1
ENSG00000228452.1_4	chr1	43241484	43242461	-	484	0	0	0	0	0	0	0	0	0	0	0	0	RP5-994D16.9	ENSG00000228452.1_4	1	ENST00000447572.1_1	2	482	495	356	495	0	4
ENSG00000274386.5_4	chr1	43250678	43282290	+	4373	18	14	9	22	20	10	15	0	7	41	16	12	TMEM269	ENSG00000274386.5_4	4	ENST00000421630.6_2,ENST00000637012.1_3,ENST00000536543.5_4,ENST00000605272.1_2	11,6,7,3	1283,3348,976,513	30329,12438,9264,2616	200,2720,217,234	7076,4714,3485,1947	607,607,732,0	2,2,2,-1
ENSG00000177868.11_2	chr1	43272723	43282923	-	1208	256	304	374	380	274	261	316	0	5	212	345	317	SVBP	ENSG00000177868.11_2	3	ENST00000372522.5_1,ENST00000372521.8_1,ENST00000497437.1_1	3,3,3	647,655,705	9105,9541,3137	448,444,494	8931,8931,2527	0,0,0	3,3,5
ENSG00000164010.14_5	chr1	43282759	43310664	+	5756	162	133	165	142	185	180	235	1	15	277	316	355	ERMAP	ENSG00000164010.14_5	9	ENST00000372517.7_4,ENST00000645239.1_1,ENST00000643061.1_1,ENST00000647120.1_1,ENST00000487556.6_2,ENST00000642150.1_1,ENST00000470938.1_1,ENST00000372514.7_4,ENST00000328249.3_4	12,4,3,10,11,8,2,11,9	3464,579,576,535,3182,1608,483,3358,3940	24441,12798,13076,24870,24677,20965,871,16071,11130	2476,281,330,130,2466,812,316,2472,2468	8370,7808,8370,9300,9300,8418,871,4706,3923	1418,0,0,0,0,0,0,1418,0	3,4,-1,-1,-1,-1,-1,2,-1
ENSG00000228192.7_4	chr1	43300352	43312093	-	1617	50	74	92	84	73	57	38	0	20	35	58	41	RP11-342M1.3	ENSG00000228192.7_4	4	ENST00000414798.1_1,ENST00000416809.2_1,ENST00000444563.5_1,ENST00000425076.1_1	2,3,5,5	512,624,605,531	11229,8810,3884,3958	450,269,173,141	11229,8318,1573,1647	0,0,0,0	4,5,7,7
ENSG00000164011.17_3	chr1	43312244	43318148	+	2036	217	264	314	248	265	211	259	0	0	241	298	353	ZNF691	ENSG00000164011.17_3	8	ENST00000372502.5_1,ENST00000372508.7_1,ENST00000372507.5_1,ENST00000372506.5_1,ENST00000372504.5_3,ENST00000397034.3_1,ENST00000372503.2_1,ENST00000630961.1_3	4,2,3,4,5,4,2,2	1906,1575,1680,1855,1930,724,991,1579	3994,4293,4171,3994,3910,1249,1208,207	1523,1527,1527,1527,1527,341,804,1523	2634,4293,2634,2634,2634,917,1208,207	946,854,854,854,919,0,0,919	3,2,3,4,4,3,1,1
ENSG00000233708.1_4	chr1	43352268	43354438	-	1962	0	0	0	0	0	0	0	0	0	0	0	0	RP11-342M1.7	ENSG00000233708.1_4	1	ENST00000448759.1_1	5	1957	213	718	123	0	7
ENSG00000237090.1_4	chr1	43356765	43358101	-	1326	0	1	0	0	0	0	0	0	0	2	0	0	RP11-342M1.6	ENSG00000237090.1_4	1	ENST00000417517.1_1	2	1324	12	1270	12	0	4
ENSG00000225099.1_3	chr1	43368903	43369583	+	681	0	1	3	0	1	3	2	0	0	0	1	0	RP5-848E13.1	ENSG00000225099.1_3	1	ENST00000439215.1_1	1	680	0	680	0	0	-1
ENSG00000117394.21_3	chr1	43391046	43424847	-	4724	13697	13899	12444	9252	7249	6044	2916	33	126	14919	21668	21716	SLC2A1	ENSG00000117394.21_3	9	ENST00000426263.8_2,ENST00000630287.2_1,ENST00000475162.3_1,ENST00000625233.2_1,ENST00000372500.4_1,ENST00000415851.6_1,ENST00000630821.1_1,ENST00000629908.1_1,ENST00000460369.3_2	10,9,4,4,3,3,2,1,2	3660,2389,594,1027,530,575,589,400,539	30141,30303,15848,27513,27608,27333,15313,0,6704	1866,1085,240,547,202,246,355,400,314	15313,15313,12020,15313,27428,15313,15313,0,6704	0,0,173,0,0,0,0,0,0	10,5,4,6,5,5,4,3,2
ENSG00000284138.1_3	chr1	43417873	43418312	-	440	37	34	50	27	33	20	16	0	0	84	83	77	RP5-848E13.5	ENSG00000284138.1_3	1	ENST00000639582.1_1	1	439	0	439	0	0	3
ENSG00000227533.5_3	chr1	43424720	43449029	+	3364	30	29	17	21	18	14	11	0	92	64	54	55	RP5-848E13.3	ENSG00000227533.5_3	2	ENST00000431759.5_1,ENST00000416689.1_1	4,3	1120,3072	23189,14252	528,2454	10672,10672	0,0	-1,-1
ENSG00000283973.1_3	chr1	43424736	43427535	-	852	10	14	3	4	1	1	0	0	1	8	12	9	RP5-848E13.4	ENSG00000283973.1_3	2	ENST00000640236.1_1,ENST00000640492.1_1	5,6	530,753	2196,1953	207,221	856,856	0,0	7,8
ENSG00000207256.1	chr1	43457109	43457215	+	107	0	2	0	0	0	0	0	0	0	0	4	1	RNU6-880P	ENSG00000207256.1	1	ENST00000384526.1	1	106	0	106	0	0	-1
ENSG00000252803.1	chr1	43489220	43489308	-	89	0	0	0	0	0	0	0	0	0	0	0	0	RNU6-870P	ENSG00000252803.1	1	ENST00000516994.1	1	88	0	88	0	0	3
ENSG00000277513.1_4	chr1	43569757	43570168	+	412	0	0	0	0	0	0	0	0	0	0	0	0	RP3-393B19.1	ENSG00000277513.1_4	1	ENST00000622380.1_1	1	411	0	411	0	0	-1
ENSG00000186973.10_2	chr1	43610824	43622067	+	843	19	7	17	17	9	7	11	0	0	28	20	18	FAM183A	ENSG00000186973.10_2	6	ENST00000410048.5_1,ENST00000409337.5_1,ENST00000410025.5_1,ENST00000409396.5_2,ENST00000335282.4_1,ENST00000481753.1_1	4,3,4,4,4,2	496,473,526,444,484,363	10747,8056,7953,7912,7960,3275	190,224,190,161,190,190	5464,5386,3275,3227,3275,3275	317,0,175,0,401,0	1,-1,1,1,1,-1
ENSG00000117395.12_4	chr1	43629846	43736607	-	3561	1187	1614	1816	1882	1488	1395	1135	1	14	817	1642	1683	EBNA1BP2	ENSG00000117395.12_4	9	ENST00000431635.6_2,ENST00000236051.2_2,ENST00000463906.1_1,ENST00000491223.5_1,ENST00000472982.5_1,ENST00000483082.1_1,ENST00000461557.2_1,ENST00000466927.5_1,ENST00000474566.1_1	10,9,6,5,3,2,9,3,5	1493,1313,931,675,1005,757,732,297,727	6902,6763,5844,1058,319,84,98594,79931,54980	318,309,365,271,707,528,148,127,265	2021,2021,2021,600,235,84,46449,46449,34826	0,0,0,0,0,0,0,0,0	10,9,8,7,5,4,11,5,7
ENSG00000243710.7_3	chr1	43637820	43720029	+	5764	2	5	5	0	1	0	0	0	0	5	6	5	CFAP57	ENSG00000243710.7_3	8	ENST00000372492.8_3,ENST00000528956.5_1,ENST00000610710.4_3,ENST00000529956.5_1,ENST00000525227.5_1,ENST00000533339.1_1,ENST00000534615.1_1,ENST00000428122.1_1	23,11,24,4,4,13,2,4	4221,3026,4138,572,452,2081,556,575	77988,35522,77887,10698,8813,35615,1351,6347	381,1135,378,316,178,316,478,249	10694,10694,10694,8624,4323,10694,1351,3966	3731,2087,3829,0,190,190,0,233	2,2,2,2,2,2,-1,-1
ENSG00000199240.1	chr1	43662088	43662207	+	120	0	0	0	0	0	0	0	0	0	0	1	0	RNA5SP46	ENSG00000199240.1	1	ENST00000362370.1	1	119	0	119	0	0	-1
ENSG00000179178.10_3	chr1	43735665	43739673	+	2127	0	0	2	1	1	2	1	0	0	0	2	6	TMEM125	ENSG00000179178.10_3	4	ENST00000439858.5_1,ENST00000432792.6_1,ENST00000442284.1_1,ENST00000456751.1_3	4,4,2,3	1782,1846,177,564	2226,2131,596,1259	1424,1424,139,218	1391,1391,596,1020	659,659,0,0	4,4,-1,3
ENSG00000253313.5_2	chr1	43747554	43751288	-	1516	40	56	12	12	8	6	20	0	1	57	96	102	C1orf210	ENSG00000253313.5_2	2	ENST00000523677.5_1,ENST00000423420.1_1	3,3	1475,626	2221,2330	1224,446	2076,2185	0,0	3,3
ENSG00000066056.13_2	chr1	43766664	43788779	+	6694	148	120	21	18	16	12	4	0	3	35	9	12	TIE1	ENSG00000066056.13_2	10	ENST00000372476.7_1,ENST00000538015.1_1,ENST00000485125.1_1,ENST00000480269.1_1,ENST00000488437.1_1,ENST00000471187.1_1,ENST00000461061.1_1,ENST00000473014.1_1,ENST00000492599.1_1,ENST00000492874.1_1	23,8,2,3,5,2,4,4,2,2	3859,1132,555,330,646,623,652,3083,389,615	18256,6764,2338,1573,2908,353,1451,4505,1163,345	457,314,492,140,158,372,237,1421,247,549	3722,3722,2338,1414,2139,353,683,3231,1163,345	3394,1132,0,0,0,0,0,0,0,0	1,1,-1,-1,-1,-1,-1,-1,-1,-1
ENSG00000117400.17_4	chr1	43803520	43818443	+	2212	2	3	3	4	1	1	1	0	0	1	2	0	MPL	ENSG00000117400.17_4	4	ENST00000638732.1_1,ENST00000372470.8_2,ENST00000413998.7_2,ENST00000643351.1_1	10,12,12,4	1733,1896,1875,526	9955,13027,13048,2947	298,298,298,218	5932,5932,5932,2254	0,1896,1875,0	-1,1,1,-1
ENSG00000234694.1_4	chr1	43820355	43824329	-	661	11	22	12	4	7	4	11	0	7	12	7	11	RP1-92O14.3	ENSG00000234694.1_4	1	ENST00000424948.1_1	3	658	3316	322	2797	0	5
ENSG00000117399.13_2	chr1	43824626	43828874	+	2038	1569	2022	2829	2191	1367	1200	2084	8	4	1244	1987	2058	CDC20	ENSG00000117399.13_2	4	ENST00000310955.10_1,ENST00000372462.1_1,ENST00000478882.1_1,ENST00000482046.1_1	11,10,4,3	1664,1767,751,419	2584,2423,346,1589	252,383,330,187	950,950,140,950	1490,1490,0,0	2,1,-1,-1
ENSG00000066322.14_3	chr1	43829068	43833745	-	2507	1898	1900	1465	1243	1630	1583	1076	4	9	1208	1594	1606	ELOVL1	ENSG00000066322.14_3	16	ENST00000372458.7_1,ENST00000621943.4_1,ENST00000413844.3_1,ENST00000468865.6_1,ENST00000464204.5_1,ENST00000470968.6_1,ENST00000487209.5_1,ENST00000470769.5_1,ENST00000497569.5_1,ENST00000482302.5_1,ENST00000497050.5_1,ENST00000478481.5_1,ENST00000479439.5_1,ENST00000465321.5_1,ENST00000479686.5_1,ENST00000496932.1_1	8,8,7,6,8,6,7,8,8,9,8,4,6,7,5,4	1469,1617,1444,791,1026,861,821,1207,822,975,965,560,640,719,412,775	3152,2723,3232,749,3225,3393,3342,1505,2288,2426,2723,307,1147,2740,2644,2614	740,739,739,409,381,366,301,319,190,190,252,286,190,190,130,448	2292,1863,2292,187,2292,2292,2292,645,1428,921,1863,134,645,1504,1863,2292	0,0,0,0,0,0,0,0,0,0,0,0,0,0,0,0	8,8,7,8,10,8,9,10,10,11,10,6,8,9,7,6
ENSG00000159479.16_2	chr1	43849588	43855479	-	2704	1335	1629	1478	1397	1468	1632	1215	3	6	1314	1495	1528	MED8	ENSG00000159479.16_2	5	ENST00000290663.10_1,ENST00000372457.8_1,ENST00000372455.4_1,ENST00000460803.1_1,ENST00000473560.1_1	8,7,7,3,3	1475,1917,1179,707,976	4416,3922,3879,551,693	635,1137,380,553,692	1331,1331,1270,363,505	0,0,0,0,0	8,7,7,5,5
ENSG00000229431.1_4	chr1	43850784	43854826	+	731	0	1	1	0	0	0	1	0	0	0	0	1	RP1-92O14.6	ENSG00000229431.1_4	1	ENST00000436713.1_1	4	727	3315	449	2130	0	-1
ENSG00000198198.15_4	chr1	43855553	43919918	+	25040	683	650	938	593	1020	806	1071	2	81	1243	872	975	SZT2	ENSG00000198198.15_4	17	ENST00000372450.8_3,ENST00000634258.2_2,ENST00000562955.2_2,ENST00000638631.1_1,ENST00000406439.7_2,ENST00000357658.4_2,ENST00000639852.1_1,ENST00000470139.1_2,ENST00000478140.1_1,ENST00000638642.1_1,ENST00000638769.1_1,ENST00000639197.1_1,ENST00000470897.2_2,ENST00000471177.1_1,ENST00000638263.1_1,ENST00000460536.1_1,ENST00000640484.1_1	5,72,71,3,6,5,9,18,3,3,3,1,3,5,8,10,9	1186,10973,13897,2571,2192,1596,1305,4080,540,357,304,2203,465,569,4240,4276,2257	15826,50284,50454,13481,20700,19030,16395,4652,315,281,314,0,178,1046,3223,3122,3014	611,815,3910,2350,828,1084,234,1249,261,241,127,2203,358,170,1559,2313,635	13182,13182,13182,13182,13182,13182,10532,901,208,193,190,0,91,506,2098,1375,1375	532,10227,10057,0,502,0,941,1781,0,0,0,0,0,0,0,0,0	1,1,1,-1,1,-1,-1,-1,-1,-1,-1,-1,-1,-1,-1,-1,-1
ENSG00000229372.1_4	chr1	43913447	43914315	-	699	0	0	0	0	0	0	0	0	0	0	0	0	RP11-506B15.4	ENSG00000229372.1_4	1	ENST00000396885.2_1	2	697	171	541	171	0	4
ENSG00000178922.16_2	chr1	43916674	43919660	-	2740	0	0	0	0	0	0	0	0	1	0	0	0	HYI	ENSG00000178922.16_2	13	ENST00000372425.8_1,ENST00000583037.5_1,ENST00000483618.1_1,ENST00000372433.5_1,ENST00000372434.5_2,ENST00000470662.5_1,ENST00000487366.5_1,ENST00000372430.7_1,ENST00000372432.5_1,ENST00000372427.5_1,ENST00000486909.1_1,ENST00000496142.1_1,ENST00000469587.1_1	8,9,2,8,9,7,7,8,8,6,7,3,2	1257,1313,483,788,1016,633,630,788,1058,2167,898,383,549	1729,1673,104,1774,1655,1661,1679,1729,1747,582,1630,169,98	394,394,391,157,230,153,153,153,368,1704,253,284,336	1067,584,104,1094,584,1067,1067,1067,1067,192,1067,88,98	0,0,0,157,0,82,153,82,0,0,0,0,0	8,8,4,7,9,7,6,8,7,8,7,5,4
ENSG00000229348.1_3	chr1	43919598	43922666	+	545	1	3	2	2	2	2	3	0	0	4	3	3	RP11-506B15.6	ENSG00000229348.1_3	1	ENST00000444386.1_1	2	543	2525	417	2525	0	-1
ENSG00000142949.16_3	chr1	43990858	44089337	+	10712	8308	7433	6920	4169	6851	5547	7648	20	306	12191	8361	8278	PTPRF	ENSG00000142949.16_3	16	ENST00000496043.5_1,ENST00000481019.5_1,ENST00000617451.4_1,ENST00000359947.8_2,ENST00000438120.5_2,ENST00000436724.5_1,ENST00000372405.1_1,ENST00000437607.1_1,ENST00000467464.1_1,ENST00000412568.6_1,ENST00000429895.5_1,ENST00000414879.5_1,ENST00000496447.5_1,ENST00000372407.4_1,ENST00000463041.1_1,ENST00000477970.1_1	5,4,8,34,33,8,6,6,4,25,25,25,21,22,3,11	410,455,1121,7693,6344,2160,1956,782,567,4129,6287,4811,5866,4578,295,3310	27922,24522,47288,85097,85123,47015,39924,33426,8071,27133,26314,26581,19726,20246,991,6413	135,194,214,1731,581,1268,1268,188,269,532,1719,907,1731,1728,218,928	9442,9442,15649,15649,15649,15649,15649,15649,5638,6119,5147,6119,4503,3730,618,3730	0,0,783,5692,5666,0,0,0,0,3849,4636,3972,0,2918,0,0	-1,-1,3,3,3,-1,-1,1,-1,-1,-1,-1,-1,-1,-1,-1
ENSG00000284989.1_1	chr1	44115820	44396686	+	4037	1032	1145	1095	776	903	753	1320	1	10	1584	1357	1327	RP11-7O11.7	ENSG00000284989.1_1	1	ENST00000645057.1_1	26	4011	276855	882	56072	646	2
ENSG00000066135.12_3	chr1	44115829	44171186	+	5172	1599	1765	1660	1160	1335	1105	1994	4	21	2525	2237	2249	KDM4A	ENSG00000066135.12_3	5	ENST00000372396.3_1,ENST00000463151.5_2,ENST00000485249.1_2,ENST00000472265.1_1,ENST00000481296.1_1	22,8,8,2,3	4452,1015,844,378,557	50905,15470,12871,399,1131	1285,193,193,270,459	11809,4532,4532,399,684	3174,0,24,0,0	2,2,-1,-1,-1
ENSG00000236200.5_4	chr1	44165436	44173809	-	1931	38	40	70	59	29	31	53	0	3	24	48	31	RP11-184I16.2	ENSG00000236200.5_4	5	ENST00000398804.7_1,ENST00000439057.5_1,ENST00000434346.1_1,ENST00000453015.1_1,ENST00000418149.1_1	5,5,3,2,2	587,681,830,645,414	7786,6737,1542,706,2602	298,282,631,393,271	3651,2602,836,706,2602	0,0,0,0,0	7,7,5,4,4
[truncated: 59,233 more rows]

## Sheet: ciri2
#chrom	start	end	name	score	strand	hg19/ciri2.0.6/siGFP_LS_rep1.ciri2.txt_BSJ	hg19/ciri2.0.6/siGFP_LS_rep2.ciri2.txt_BSJ	hg19/ciri2.0.6/siNC_LS_rep1.ciri2.txt_BSJ	hg19/ciri2.0.6/siNC_LS_rep2.ciri2.txt_BSJ	hg19/ciri2.0.6/siNONO_siRNA2_rep1.ciri2.txt_BSJ	hg19/ciri2.0.6/siNONO_siRNA2_rep2.ciri2.txt_BSJ	hg19/ciri2.0.6/siNONO_siRNA3_rep1.ciri2.txt_BSJ	hg19/ciri2.0.6/siNONO_siRNA3_rep2.ciri2.txt_BSJ	hg19/ciri2.0.6/siSFPQ_siRNA3_rep1.ciri2.txt_BSJ	hg19/ciri2.0.6/siSFPQ_siRNA3_rep2.ciri2.txt_BSJ	hg19/ciri2.0.6/siSFPQ_siRNA4_rep1.ciri2.txt_BSJ	hg19/ciri2.0.6/siSFPQ_siRNA4_rep2.ciri2.txt_BSJ	name	gids	ntids	tids	mature_length	exons	exon_no	flank_intron	intron_up	intron_down	host_exons	host_length	host_orf_length	dist5	dist3	comments	circ_type	aludist	aludist_up_down	aluname_up_down	aluscore_up_down	mirdist	mirdist_up_down	mirname_up_down	mirscore_up_down	l1dist	l1dist_up_down	l1name_up_down	l1score_up_down	l2dist	l2dist_up_down	l2name_up_down
[truncated: 12,474 more rows]
[truncated: 1 more columns]

## Sheet: find_circ
#chrom	start	end	name	score	strand	hg19/find_circ1.2/siGFP_LS_rep1.circ_candidates.bed_BSJ	hg19/find_circ1.2/siGFP_LS_rep2.circ_candidates.bed_BSJ	hg19/find_circ1.2/siNC_LS_rep1.circ_candidates.bed_BSJ	hg19/find_circ1.2/siNC_LS_rep2.circ_candidates.bed_BSJ	hg19/find_circ1.2/siNONO_siRNA2_rep1.circ_candidates.bed_BSJ	hg19/find_circ1.2/siNONO_siRNA2_rep2.circ_candidates.bed_BSJ	hg19/find_circ1.2/siNONO_siRNA3_rep1.circ_candidates.bed_BSJ	hg19/find_circ1.2/siNONO_siRNA3_rep2.circ_candidates.bed_BSJ	hg19/find_circ1.2/siSFPQ_siRNA3_rep1.circ_candidates.bed_BSJ	hg19/find_circ1.2/siSFPQ_siRNA3_rep2.circ_candidates.bed_BSJ	hg19/find_circ1.2/siSFPQ_siRNA4_rep1.circ_candidates.bed_BSJ	hg19/find_circ1.2/siSFPQ_siRNA4_rep2.circ_candidates.bed_BSJ
[truncated: 14,229 more rows]
