# Supplementary material for: The RNA-binding protein SFPQ preserves long-intron splicing and regulates circRNA biogenesis in mammals
Source: eLife. 2021 Jan 21;10:e63088. doi: 10.7554/eLife.63088 (PMC7819710; doi:10.7554/eLife.63088)
Supplement: Supplementary file 5. — Mapping statistics and annotated output from featureCounts, ciri2 and find_circ using RNAseq on mouse brain (GSE60246). [file elife-63088-supp5.xlsx]

## Sheet: stats
samples	reads	mapped	chimera	multimappers	multimappers_toomany	unmapped_tooshort	unmapped_other
mm10/STAR/SRR1539408	212107392	158324716	2797082	31701499	1122696	20753972	204509
mm10/STAR/SRR1539409	246364107	187438700	3273822	34800245	1295655	22614951	214556
mm10/STAR/SRR1539410	203042236	156367385	2742968	27992046	1004582	17459706	218517
mm10/STAR/SRR1539411	208987809	165191457	2537850	27076554	941526	15566240	212032
mm10/STAR/SRR1539412	216933192	165090151	3010170	32191306	1024156	18422445	205134
mm10/STAR/SRR1539413	225670842	172813466	2339429	30880887	986570	20752201	237718
mm10/STAR/SRR1539414	202258499	150154149	2437969	32181792	913776	18816874	191908
mm10/STAR/SRR1539415	210783080	159872754	2791600	31700176	836655	18156087	217408
mm10/STAR/SRR1539416	234590245	178299140	3011869	34003440	934913	21099230	253522

## Sheet: featureCounts
# Program:featureCounts v2.0.0; Command:"/home/tbhmbi/software/subread-2.0.0-Linux-x86_64/bin/featureCounts" "-a" "/home/tbhmbi/genomes/mm10/annotation/gencode/gencode.gtf" "-o" "mm10/STAR/featureCounts/fc.exon.gene_id.vM12.txt.tmp" "-t" "exon" "-g" "gene_id" "-s" "1" "-O" "mm10/STAR/SRR1539408.bam" "mm10/STAR/SRR1539409.bam" "mm10/STAR/SRR1539410.bam" "mm10/STAR/SRR1539411.bam" "mm10/STAR/SRR153…
Geneid	Chr	Start	End	Strand	Length	mm10/STAR/SRR1539408.bam	mm10/STAR/SRR1539409.bam	mm10/STAR/SRR1539410.bam	mm10/STAR/SRR1539411.bam	mm10/STAR/SRR1539412.bam	mm10/STAR/SRR1539413.bam	mm10/STAR/SRR1539414.bam	mm10/STAR/SRR1539415.bam	mm10/STAR/SRR1539416.bam	name	gids	ntids	tids	exons	total_exon_length	total_intron_length	longest_exon	longest_intron	ORF_length	ORF_exon_start
ENSMUSG00000102693.1	chr1	3073253	3074322	+	1070	0	0	0	0	0	0	0	0	0	4933401J01Rik	ENSMUSG00000102693.1	1	ENSMUST00000193812.1	1	1069	0	1069	0	0	-1
ENSMUSG00000064842.1	chr1	3102016	3102125	+	110	0	0	0	0	0	0	0	0	0	Gm26206	ENSMUSG00000064842.1	1	ENSMUST00000082908.1	1	109	0	109	0	0	-1
ENSMUSG00000051951.5	chr1	3205901	3671498	-	6094	1315	1562	1368	1328	1297	1422	566	547	851	Xkr4	ENSMUSG00000051951.5	3	ENSMUST00000162897.1,ENSMUST00000159265.1,ENSMUST00000070533.4	2,2,3	4151,2987,3631	6292,6122,453385	2735,2193,2486	6292,6122,248651	0,0,0	4,4,3
ENSMUSG00000102851.1	chr1	3252757	3253236	+	480	0	0	0	0	0	0	0	0	0	Gm18956	ENSMUSG00000102851.1	1	ENSMUST00000192857.1	1	479	0	479	0	0	-1
ENSMUSG00000103377.1	chr1	3365731	3368549	-	2819	38	27	28	24	22	24	11	15	18	Gm37180	ENSMUSG00000103377.1	1	ENSMUST00000195335.1	1	2818	0	2818	0	0	3
ENSMUSG00000104017.1	chr1	3375556	3377788	-	2233	18	15	9	22	35	18	15	18	14	Gm37363	ENSMUSG00000104017.1	1	ENSMUST00000192336.1	1	2232	0	2232	0	0	3
ENSMUSG00000103025.1	chr1	3464977	3467285	-	2309	8	6	2	9	18	22	3	18	7	Gm37686	ENSMUSG00000103025.1	1	ENSMUST00000194099.1	1	2308	0	2308	0	0	3
ENSMUSG00000089699.1	chr1	3466587	3513553	+	250	0	0	0	0	0	0	0	0	0	Gm1992	ENSMUSG00000089699.1	1	ENSMUST00000161581.1	2	248	46718	148	46718	0	-1
ENSMUSG00000103201.1	chr1	3512451	3514507	-	2057	8	11	1	4	7	16	4	4	8	Gm37329	ENSMUSG00000103201.1	1	ENSMUST00000192973.1	1	2056	0	2056	0	0	3
ENSMUSG00000103147.1	chr1	3531795	3532720	+	926	0	0	0	0	0	0	0	0	1	Gm7341	ENSMUSG00000103147.1	1	ENSMUST00000192183.1	1	925	0	925	0	0	-1
ENSMUSG00000103161.1	chr1	3592892	3595903	-	3012	19	27	20	16	33	29	21	19	39	Gm38148	ENSMUSG00000103161.1	1	ENSMUST00000195166.1	1	3011	0	3011	0	0	3
ENSMUSG00000102331.1	chr1	3647309	3658904	-	3259	29	36	28	27	16	29	29	28	54	Gm19938	ENSMUSG00000102331.1	1	ENSMUST00000192692.1	2	3257	8338	3200	8338	0	4
ENSMUSG00000102348.1	chr1	3680155	3681788	+	1634	0	0	0	0	0	0	0	0	0	Gm10568	ENSMUSG00000102348.1	1	ENSMUST00000193244.1	1	1633	0	1633	0	0	-1
ENSMUSG00000102592.1	chr1	3752010	3754360	+	2351	0	0	0	0	0	0	0	0	0	Gm38385	ENSMUSG00000102592.1	1	ENSMUST00000194454.1	1	2350	0	2350	0	0	-1
ENSMUSG00000088333.2	chr1	3783876	3783933	-	58	0	0	0	0	0	0	0	0	0	Gm27396	ENSMUSG00000088333.2	1	ENSMUST00000157708.2	1	57	0	57	0	0	3
ENSMUSG00000102343.1	chr1	3905739	3986215	-	1364	0	0	0	0	0	0	0	0	0	Gm37381	ENSMUSG00000102343.1	2	ENSMUST00000194643.1,ENSMUST00000192427.1	3,2	654,897	79822,862	395,824	79026,862	0,0	5,4
ENSMUSG00000025900.12	chr1	3999557	4409241	-	12311	75	93	50	77	73	91	68	87	99	Rp1	ENSMUSG00000025900.12	4	ENSMUST00000208660.1,ENSMUST00000208793.1,ENSMUST00000194992.6,ENSMUST00000027032.5	30,4,4,4	4140,3043,854,6865	405544,115352,115352,9303	635,2166,635,5945	56333,58898,58898,7363	0,0,0,0	30,6,4,4
ENSMUSG00000102948.1	chr1	4256234	4260519	-	1867	0	0	0	0	0	0	0	0	0	Gm6101	ENSMUSG00000102948.1	1	ENSMUST00000195384.1	2	1865	2420	1672	2420	0	4
ENSMUSG00000104123.1	chr1	4363346	4364829	-	1484	4	0	0	0	0	0	0	0	0	Gm37483	ENSMUSG00000104123.1	1	ENSMUST00000194382.1	1	1483	0	1483	0	0	3
ENSMUSG00000025902.13	chr1	4490931	4497354	-	4772	471	574	554	471	469	598	442	519	604	Sox17	ENSMUSG00000025902.13	8	ENSMUST00000027035.9,ENSMUST00000195555.1,ENSMUST00000192650.5,ENSMUST00000116652.7,ENSMUST00000192505.1,ENSMUST00000191647.1,ENSMUST00000191939.1,ENSMUST00000192913.1	5,3,4,4,1,4,2,4	3122,1974,3238,1508,1147,402,838,1502	2360,3533,2726,3142,0,3470,432,2427	1737,1413,1278,955,1147,210,635,806	1273,2428,1273,2428,0,1273,432,1646	0,-871,0,0,0,0,0,0	5,3,4,4,3,6,4,6
ENSMUSG00000104238.1	chr1	4496551	4499558	+	2917	10	5	3	4	5	8	1	5	16	Gm37587	ENSMUSG00000104238.1	2	ENSMUST00000193450.1,ENSMUST00000194935.1	1,3	2827,472	0,1612	2827,204	0,1259	0,0	-1,-1
ENSMUSG00000102269.1	chr1	4522905	4526737	+	2991	1	0	0	0	0	0	2	1	0	Gm7357	ENSMUSG00000102269.1	1	ENSMUST00000195361.1	2	2989	843	2291	843	0	-1
ENSMUSG00000096126.1	chr1	4529017	4529123	+	107	1	5	2	1	9	2	5	2	3	Gm22307	ENSMUSG00000096126.1	1	ENSMUST00000180019.1	1	106	0	106	0	0	-1
ENSMUSG00000103003.1	chr1	4534837	4535286	-	450	0	0	0	0	0	0	0	0	0	Gm38076	ENSMUSG00000103003.1	1	ENSMUST00000193889.1	1	449	0	449	0	0	3
ENSMUSG00000104328.1	chr1	4583129	4586252	-	2773	0	0	0	0	0	0	6	0	0	Gm37323	ENSMUSG00000104328.1	1	ENSMUST00000195771.1	2	2771	352	2456	352	0	4
ENSMUSG00000102735.1	chr1	4610471	4611406	+	936	0	0	0	0	0	0	0	3	0	Gm7369	ENSMUSG00000102735.1	1	ENSMUST00000192738.1	1	935	0	935	0	0	-1
ENSMUSG00000098104.1	chr1	4687934	4689403	-	1470	93	145	118	112	124	149	119	143	162	Gm6085	ENSMUSG00000098104.1	1	ENSMUST00000182774.1	1	1469	0	1469	0	0	3
ENSMUSG00000102175.1	chr1	4692219	4693424	-	1206	2	4	4	3	0	24	2	0	0	Gm6119	ENSMUSG00000102175.1	1	ENSMUST00000193443.1	1	1205	0	1205	0	0	3
ENSMUSG00000088000.1	chr1	4723277	4723379	-	103	0	0	0	0	1	0	0	0	0	Gm25493	ENSMUSG00000088000.1	1	ENSMUST00000157375.1	1	102	0	102	0	0	3
ENSMUSG00000103265.1	chr1	4735046	4735676	-	631	3	0	1	2	11	14	1	0	0	Gm2053	ENSMUSG00000103265.1	1	ENSMUST00000195671.1	1	630	0	630	0	0	3
ENSMUSG00000103922.1	chr1	4771131	4772199	+	1069	43	42	33	51	32	38	41	27	58	Gm6123	ENSMUSG00000103922.1	1	ENSMUST00000193658.1	1	1068	0	1068	0	0	-1
ENSMUSG00000033845.13	chr1	4773206	4785739	-	8487	8188	10042	7941	8738	8706	9865	8521	8965	10342	Mrpl15	ENSMUSG00000033845.13	7	ENSMUST00000130201.7,ENSMUST00000156816.6,ENSMUST00000045689.13,ENSMUST00000115538.4,ENSMUST00000192286.1,ENSMUST00000146665.2,ENSMUST00000132625.1	5,5,4,5,1,4,2	1889,4198,493,905,4599,1565,652	10615,8330,10769,8457,0,2953,1468	1310,3590,165,424,4599,1080,533	4920,4920,4920,4920,0,1468,1468	0,0,0,0,0,0,0	5,5,2,7,3,4,4
ENSMUSG00000102275.1	chr1	4778063	4779212	-	1150	30	44	7	56	47	37	25	24	18	Gm37144	ENSMUSG00000102275.1	1	ENSMUST00000195445.1	1	1149	0	1149	0	0	3
ENSMUSG00000025903.14	chr1	4807788	4848410	+	7145	9336	10884	9190	8785	10015	10717	9527	10235	11596	Lypla1	ENSMUSG00000025903.14	8	ENSMUST00000134384.7,ENSMUST00000027036.10,ENSMUST00000150971.7,ENSMUST00000119612.8,ENSMUST00000137887.7,ENSMUST00000115529.7,ENSMUST00000131119.1,ENSMUST00000141278.1	10,9,8,7,7,8,8,2	1126,2498,869,522,437,922,652,4454	39496,36418,32587,36756,32634,36519,32204,1468	270,1776,330,211,101,389,137,2583	20098,20098,20098,20098,20098,20098,20098,1468	666,684,658,273,0,583,0,0	1,1,1,1,1,1,4,-1
ENSMUSG00000104217.1	chr1	4807892	4886770	+	825	6959	8130	7241	6801	7547	8234	7187	7863	8793	Gm37988	ENSMUSG00000104217.1	1	ENSMUST00000155020.1	10	815	78063	176	26338	185	1
ENSMUSG00000033813.15	chr1	4857814	4897909	+	3017	20419	24332	19990	20630	22009	23772	21092	22594	24476	Tcea1	ENSMUSG00000033813.15	2	ENSMUST00000081551.13,ENSMUST00000165720.2	10,10	2537,2844	37554,37027	1549,1553	10495,10495	896,929	1,1
ENSMUSG00000062588.4	chr1	4880049	4880651	-	603	134	153	89	139	117	117	66	92	145	Gm6104	ENSMUSG00000062588.4	1	ENSMUST00000078030.4	1	602	0	602	0	0	3
ENSMUSG00000103280.1	chr1	4905751	4906861	-	1111	99	107	101	99	116	136	65	14	75	Gm37277	ENSMUSG00000103280.1	1	ENSMUST00000194052.1	1	1110	0	1110	0	0	3
ENSMUSG00000002459.17	chr1	4909576	5070285	-	4239	1352	2362	2115	1697	1975	1557	572	614	708	Rgs20	ENSMUSG00000002459.17	7	ENSMUST00000002533.14,ENSMUST00000118000.7,ENSMUST00000119256.7,ENSMUST00000170566.1,ENSMUST00000147158.1,ENSMUST00000156289.1,ENSMUST00000133521.1	5,6,5,4,4,2,2	1773,2119,878,573,703,1529,668	108190,158590,107455,108332,157237,95322,6826	1086,1086,260,234,272,1461,405	95322,96749,94587,102331,146021,95322,6826	0,0,0,0,0,0,0	5,6,5,2,6,4,4
ENSMUSG00000091305.1	chr1	4927028	4927299	-	272	3	0	0	4	3	17	1	0	0	Gm17100	ENSMUSG00000091305.1	1	ENSMUST00000168963.1	1	271	0	271	0	0	3
ENSMUSG00000102653.1	chr1	4938576	4940710	-	2135	28	9	8	18	29	34	7	10	6	Gm37079	ENSMUSG00000102653.1	1	ENSMUST00000194114.1	1	2134	0	2134	0	0	3
ENSMUSG00000085623.1	chr1	4970857	4976820	+	3725	0	1	3	0	0	0	4	3	0	Gm16041	ENSMUSG00000085623.1	1	ENSMUST00000144339.1	3	3722	2241	3255	1737	0	-1
ENSMUSG00000091665.1	chr1	5063060	5064647	+	1588	0	1	0	0	0	0	1	0	0	Gm17101	ENSMUSG00000091665.1	1	ENSMUST00000169520.1	1	1587	0	1587	0	0	-1
ENSMUSG00000033793.12	chr1	5070018	5162529	+	9746	33737	36186	30745	32849	35208	35903	22244	22688	26797	Atp6v1h	ENSMUSG00000033793.12	8	ENSMUST00000192847.5,ENSMUST00000044369.12,ENSMUST00000194676.5,ENSMUST00000194301.5,ENSMUST00000194978.5,ENSMUST00000192029.5,ENSMUST00000192698.2,ENSMUST00000192142.1	13,14,5,11,2,4,13,6	1649,2035,965,4818,2508,381,1798,2312	90673,77414,11653,57110,1139,12146,77467,14301	235,424,515,2365,2362,146,314,1748	16267,16267,4446,16267,1139,5731,19257,4446	1314,1439,0,0,0,0,1386,0	2,2,2,-1,-1,2,2,-1
ENSMUSG00000104352.1	chr1	5276106	5277337	-	732	0	0	0	0	0	0	0	0	0	Gm7182	ENSMUSG00000104352.1	1	ENSMUST00000193351.1	2	730	501	656	501	0	4
ENSMUSG00000104046.1	chr1	5307739	5310017	+	2279	0	0	0	2	1	0	0	1	7	Gm37567	ENSMUSG00000104046.1	1	ENSMUST00000193241.1	1	2278	0	2278	0	0	-1
ENSMUSG00000102907.1	chr1	5403547	5405578	+	2032	0	0	0	0	0	0	0	0	0	Gm38264	ENSMUSG00000102907.1	1	ENSMUST00000194850.1	1	2031	0	2031	0	0	-1
ENSMUSG00000025905.13	chr1	5588466	5606131	+	9151	28	8	19	31	24	4	23	74	32	Oprk1	ENSMUSG00000025905.13	5	ENSMUST00000192685.1,ENSMUST00000160777.7,ENSMUST00000027038.10,ENSMUST00000160339.1,ENSMUST00000159083.1	1,4,4,3,2	2845,4671,1372,2478,3325	0,12967,12937,12595,3310	2845,3879,614,1762,2424	0,9285,9285,9285,3310	0,1140,1140,1140,0	-1,2,2,1,-1
ENSMUSG00000103936.1	chr1	5617837	5618230	-	394	0	0	0	0	0	0	0	0	0	Gm36965	ENSMUSG00000103936.1	1	ENSMUST00000193797.1	1	393	0	393	0	0	3
ENSMUSG00000093015.1	chr1	5644645	5644745	-	101	0	0	0	0	0	0	0	0	0	Gm22463	ENSMUSG00000093015.1	1	ENSMUST00000175274.1	1	100	0	100	0	0	3
ENSMUSG00000103519.1	chr1	5842874	5844672	-	1799	0	0	0	0	0	0	0	0	0	Gm37429	ENSMUSG00000103519.1	1	ENSMUST00000193807.1	1	1798	0	1798	0	0	3
ENSMUSG00000033774.4	chr1	5913707	5917398	-	3692	0	0	0	1	1	0	4	0	0	Npbwr1	ENSMUSG00000033774.4	1	ENSMUST00000044180.4	1	3691	0	3691	0	-985	1
ENSMUSG00000103090.1	chr1	6048963	6050045	-	1083	0	0	0	0	0	0	0	0	0	Gm19214	ENSMUSG00000103090.1	1	ENSMUST00000191956.1	1	1082	0	1082	0	0	3
ENSMUSG00000025907.14	chr1	6206197	6276648	+	14690	27311	34308	29840	29414	31826	33988	25765	28239	35528	Rb1cc1	ENSMUSG00000025907.14	16	ENSMUST00000159906.7,ENSMUST00000160871.7,ENSMUST00000027040.12,ENSMUST00000162210.7,ENSMUST00000160062.7,ENSMUST00000162795.7,ENSMUST00000161327.7,ENSMUST00000159802.1,ENSMUST00000162257.7,ENSMUST00000159206.1,ENSMUST00000159661.7,ENSMUST00000161183.1,ENSMUST00000159349.1,ENSMUST00000159530.1,ENSMUST00000162418.1,ENSMUST00000159656.1	6,6,24,3,4,14,21,8,9,2,6,2,3,8,3,3	650,684,7583,1148,516,2698,5686,4128,2195,517,869,330,630,890,2147,1596	27464,31473,54420,14893,18486,18329,35612,3260,23207,764,14846,1739,1360,10666,5012,3301	146,170,2450,745,244,753,1891,3305,1079,327,240,310,351,291,2074,1377	17329,21670,12983,12983,12688,3888,10763,2047,10763,764,10763,1739,1278,3077,3077,1874	0,0,4745,0,0,0,4384,0,1604,0,0,0,0,676,0,0	4,3,3,-1,3,2,-1,-1,-1,-1,-1,-1,-1,-1,-1,-1
ENSMUSG00000090031.2	chr1	6209866	6215293	-	5428	450	637	269	677	414	501	349	369	549	4732440D04Rik	ENSMUSG00000090031.2	3	ENSMUST00000191825.1,ENSMUST00000159618.1,ENSMUST00000097832.1	1,2,1	5427,411,680	0,886,0	5427,357,680	0,886,0	0,0,0	3,4,3
ENSMUSG00000087247.3	chr1	6359218	6394731	+	971	0	0	0	1	0	0	0	0	5	Fam150a	ENSMUSG00000087247.3	1	ENSMUST00000133144.3	5	966	34547	461	29059	380	1
ENSMUSG00000103355.1	chr1	6380394	6381032	+	639	5	3	0	3	2	2	3	2	6	Gm2147	ENSMUSG00000103355.1	1	ENSMUST00000193588.1	1	638	0	638	0	0	-1
ENSMUSG00000102706.1	chr1	6382634	6383106	-	473	0	0	3	3	4	0	0	1	2	Gm7417	ENSMUSG00000102706.1	1	ENSMUST00000192950.1	1	472	0	472	0	0	3
ENSMUSG00000103845.1	chr1	6429655	6441296	-	4530	373	341	386	377	281	391	177	230	300	Gm19026	ENSMUSG00000103845.1	1	ENSMUST00000194240.1	2	4528	7113	3809	7113	0	4
ENSMUSG00000033740.17	chr1	6487231	6860940	+	6464	5897	7183	6434	6501	6979	7083	13017	12948	16745	St18	ENSMUSG00000033740.17	13	ENSMUST00000140079.7,ENSMUST00000131494.7,ENSMUST00000043578.12,ENSMUST00000139756.7,ENSMUST00000131467.7,ENSMUST00000150761.7,ENSMUST00000151281.7,ENSMUST00000139838.7,ENSMUST00000163727.3,ENSMUST00000132207.1,ENSMUST00000142304.1,ENSMUST00000151015.1,ENSMUST00000130338.1	24,23,24,6,7,23,22,6,22,4,3,8,2	5868,5697,5838,429,578,4241,3511,786,5582,680,442,809,718	367835,367912,125051,64943,64902,125128,125200,67032,117783,5894,15556,20278,1545	2474,2480,2480,187,170,1010,785,368,2480,314,211,221,616	249839,265253,24412,24412,24412,24412,24412,24412,24412,3825,13418,8461,1545	3118,3118,3118,0,0,3118,3118,0,3118,324,0,0,284	5,4,5,4,5,4,3,3,3,-1,-1,-1,-1
ENSMUSG00000103329.2	chr1	6861237	6864151	-	2915	0	0	0	0	0	0	0	0	0	Gm42492	ENSMUSG00000103329.2	1	ENSMUST00000195780.2	1	2914	0	2914	0	0	3
ENSMUSG00000104385.1	chr1	6910560	6911222	+	663	0	0	1	0	0	0	1	0	0	Gm7449	ENSMUSG00000104385.1	1	ENSMUST00000194393.1	1	662	0	662	0	0	-1
ENSMUSG00000102135.1	chr1	6916559	6923588	+	626	12	16	15	26	17	11	13	13	14	Gm37108	ENSMUSG00000102135.1	1	ENSMUST00000194605.1	2	624	6405	436	6405	0	-1
ENSMUSG00000103282.1	chr1	6929759	6929788	+	30	0	0	0	0	0	0	0	0	0	Gm37275	ENSMUSG00000103282.1	1	ENSMUST00000191703.1	1	29	0	29	0	0	-1
ENSMUSG00000102534.1	chr1	6998217	6998541	+	325	0	0	0	0	0	0	0	0	0	Gm37225	ENSMUSG00000102534.1	1	ENSMUST00000193423.1	1	324	0	324	0	0	-1
ENSMUSG00000102213.1	chr1	7013762	7013920	+	159	0	0	0	0	0	0	0	0	0	Gm37489	ENSMUSG00000102213.1	1	ENSMUST00000191883.1	1	158	0	158	0	0	-1
ENSMUSG00000103629.1	chr1	7035915	7037217	+	641	0	0	0	0	0	0	0	0	0	Gm5694	ENSMUSG00000103629.1	1	ENSMUST00000195648.1	2	639	663	477	663	0	-1
ENSMUSG00000051285.17	chr1	7088920	7173628	+	6654	9134	10307	9130	9420	9033	9333	4284	4528	5351	Pcmtd1	ENSMUSG00000051285.17	8	ENSMUST00000061280.16,ENSMUST00000182114.7,ENSMUST00000182306.1,ENSMUST00000182823.1,ENSMUST00000182675.7,ENSMUST00000182388.7,ENSMUST00000182892.7,ENSMUST00000183204.1	6,5,4,2,5,3,3,4	5226,765,415,2657,1148,698,4204,3982	79482,79903,71383,80299,21291,7806,8329,8120	4113,286,191,2607,561,404,3103,3144	30978,58421,58421,80299,7341,5621,6144,2997	1069,0,0,0,156,0,0,0	2,3,-1,-1,-1,-1,-1,-1
ENSMUSG00000098201.1	chr1	7136199	7136586	-	388	5	2	2	0	1	1	0	0	1	Gm26983	ENSMUSG00000098201.1	1	ENSMUST00000182051.1	1	387	0	387	0	0	3
ENSMUSG00000103509.1	chr1	7148110	7152137	+	4028	539	580	469	674	720	734	606	671	801	Gm38372	ENSMUSG00000103509.1	1	ENSMUST00000194854.1	1	4027	0	4027	0	0	-1
ENSMUSG00000048538.7	chr1	7177739	7179037	+	1299	16	17	15	27	21	12	21	13	17	Gm9826	ENSMUSG00000048538.7	1	ENSMUST00000029124.7	1	1298	0	1298	0	0	-1
ENSMUSG00000103709.1	chr1	7189742	7189919	-	178	2	4	0	0	0	0	0	1	0	Nras-ps2	ENSMUSG00000103709.1	1	ENSMUST00000195269.1	1	177	0	177	0	0	3
ENSMUSG00000077244.1	chr1	7265803	7265932	+	130	0	0	0	0	0	0	0	0	0	Gm23274	ENSMUSG00000077244.1	1	ENSMUST00000104056.1	1	129	0	129	0	0	-1
ENSMUSG00000102768.1	chr1	7315451	7316462	+	1012	0	0	0	0	0	0	0	0	0	Gm19002	ENSMUSG00000102768.1	1	ENSMUST00000192649.1	1	1011	0	1011	0	0	-1
ENSMUSG00000097797.6	chr1	7349406	7397869	-	4339	44	38	13	34	39	28	5	23	8	Gm26901	ENSMUSG00000097797.6	4	ENSMUST00000181554.1,ENSMUST00000193106.5,ENSMUST00000193732.1,ENSMUST00000193428.1	3,3,5,1	1190,253,626,2702	47205,21656,21355,0	984,121,196,2702	45824,15636,13878,0	0,0,0,0	5,5,7,3
ENSMUSG00000103498.1	chr1	7410679	7411993	+	1124	0	0	0	0	0	0	0	0	0	Gm18984	ENSMUSG00000103498.1	1	ENSMUST00000193998.1	2	1122	192	850	192	0	-1
ENSMUSG00000103067.1	chr1	7497968	7518149	+	2596	0	0	0	0	0	0	0	0	0	Gm30414	ENSMUSG00000103067.1	1	ENSMUST00000194886.1	3	2593	17588	1975	15465	0	-1
ENSMUSG00000102320.1	chr1	7591646	7591931	+	286	0	0	0	0	0	0	0	0	0	Gm37791	ENSMUSG00000102320.1	1	ENSMUST00000195081.1	1	285	0	285	0	0	-1
ENSMUSG00000104226.1	chr1	7597379	7599473	+	2095	1	0	0	0	0	1	0	1	0	Gm7470	ENSMUSG00000104226.1	1	ENSMUST00000194219.1	1	2094	0	2094	0	0	-1
ENSMUSG00000103903.1	chr1	7664081	7664961	+	881	0	0	0	0	0	0	0	0	0	Rps2-ps2	ENSMUSG00000103903.1	1	ENSMUST00000194305.1	1	880	0	880	0	0	-1
ENSMUSG00000103557.1	chr1	7728861	7730565	-	1214	0	0	0	0	0	0	0	0	0	Gm38216	ENSMUSG00000103557.1	1	ENSMUST00000194872.1	2	1212	492	1131	492	0	4
ENSMUSG00000025909.16	chr1	8361475	9299878	-	10908	680	681	556	465	538	680	271	197	310	Sntg1	ENSMUSG00000025909.16	11	ENSMUST00000132064.7,ENSMUST00000191683.5,ENSMUST00000140295.7,ENSMUST00000140302.7,ENSMUST00000115484.8,ENSMUST00000135046.3,ENSMUST00000115488.2,ENSMUST00000144593.7,ENSMUST00000134075.7,ENSMUST00000194098.1,ENSMUST00000126083.1	20,21,21,18,7,5,17,9,5,1,5	4145,4489,4866,4038,1100,573,1537,3488,2939,2112,656	932953,932900,932897,933162,106237,106481,438931,619821,515039,0,347008	2158,2158,2158,1745,450,208,158,1875,1376,2112,318	203930,203930,203930,203930,50570,50570,100734,203930,203930,0,203930	0,0,0,0,0,0,0,0,0,0,0	20,21,21,11,9,7,17,7,7,3,7
ENSMUSG00000102647.1	chr1	8450960	8453491	-	2532	10	2	1	5	4	14	2	2	0	Gm38024	ENSMUSG00000102647.1	1	ENSMUST00000192338.1	1	2531	0	2531	0	0	3
ENSMUSG00000086235.1	chr1	8468426	8468825	-	400	4	24	0	0	0	0	0	1	0	Gm16284	ENSMUSG00000086235.1	1	ENSMUST00000140995.1	1	399	0	399	0	0	3
ENSMUSG00000102253.1	chr1	8527780	8531313	-	3534	7	12	0	11	0	1	0	2	0	Gm38259	ENSMUSG00000102253.1	1	ENSMUST00000194602.1	1	3533	0	3533	0	0	3
ENSMUSG00000093970.1	chr1	8588615	8588724	-	110	0	0	0	6	0	0	0	0	0	Gm23358	ENSMUSG00000093970.1	1	ENSMUST00000103887.2	1	109	0	109	0	0	3
ENSMUSG00000103884.1	chr1	8643696	8644859	-	1164	0	0	3	4	6	4	0	0	0	Gm37005	ENSMUSG00000103884.1	1	ENSMUST00000193281.1	1	1163	0	1163	0	0	3
ENSMUSG00000084353.1	chr1	8791923	8792162	-	240	13	10	3	6	5	10	7	11	3	Gm15452	ENSMUSG00000084353.1	1	ENSMUST00000119877.1	1	239	0	239	0	0	3
ENSMUSG00000103933.1	chr1	8815842	8816039	+	198	89	94	78	119	79	119	82	86	156	Gm36964	ENSMUSG00000103933.1	1	ENSMUST00000191876.1	1	197	0	197	0	0	-1
ENSMUSG00000076135.1	chr1	8816138	8816247	+	110	4	1	3	0	0	1	2	1	2	Gm24276	ENSMUSG00000076135.1	1	ENSMUST00000102181.1	1	109	0	109	0	0	-1
ENSMUSG00000086195.1	chr1	8855928	8856267	-	340	0	0	0	0	0	0	0	0	0	Gm6152	ENSMUSG00000086195.1	1	ENSMUST00000151704.1	1	339	0	339	0	0	3
ENSMUSG00000104504.1	chr1	8856763	8857102	+	340	0	0	0	0	0	0	0	0	0	Gm7445	ENSMUSG00000104504.1	1	ENSMUST00000192115.1	1	339	0	339	0	0	-1
ENSMUSG00000066693.2	chr1	8962996	8963621	-	626	3	6	1	6	1	0	0	0	0	Gm7493	ENSMUSG00000066693.2	1	ENSMUST00000085919.2	1	625	0	625	0	0	3
ENSMUSG00000102316.1	chr1	9191067	9192116	-	1050	5	0	0	0	4	0	0	2	0	Gm37629	ENSMUSG00000102316.1	1	ENSMUST00000193635.1	1	1049	0	1049	0	0	3
ENSMUSG00000103819.1	chr1	9258617	9259134	-	518	6	2	0	0	1	0	7	0	4	Gm38008	ENSMUSG00000103819.1	1	ENSMUST00000195333.1	1	517	0	517	0	0	3
ENSMUSG00000102871.1	chr1	9286922	9290180	+	3259	0	0	0	0	0	0	0	0	0	Gm37143	ENSMUSG00000102871.1	1	ENSMUST00000195180.1	1	3258	0	3258	0	0	-1
ENSMUSG00000101571.2	chr1	9396773	9398687	-	960	3	6	3	11	5	5	6	14	1	Gm6187	ENSMUSG00000101571.2	1	ENSMUST00000040649.6	3	957	957	470	798	0	5
ENSMUSG00000104428.1	chr1	9439741	9440376	-	636	0	0	0	0	0	0	0	0	0	Gm18299	ENSMUSG00000104428.1	1	ENSMUST00000192026.1	1	635	0	635	0	0	3
ENSMUSG00000102272.1	chr1	9450579	9451748	+	1170	0	0	0	0	1	1	1	0	0	Gm7512	ENSMUSG00000102272.1	1	ENSMUST00000195217.1	1	1169	0	1169	0	0	-1
ENSMUSG00000065625.1	chr1	9458670	9458772	+	103	0	0	0	0	0	0	0	0	0	Gm24765	ENSMUSG00000065625.1	1	ENSMUST00000083691.1	1	102	0	102	0	0	-1
ENSMUSG00000103411.1	chr1	9499338	9501522	-	1406	0	5	4	0	5	0	5	1	0	Gm18300	ENSMUSG00000103411.1	1	ENSMUST00000192792.1	3	1403	781	588	556	0	5
ENSMUSG00000061024.8	chr1	9545408	9547455	+	2048	5094	6416	5400	5671	5075	5432	5440	5667	6505	Rrs1	ENSMUSG00000061024.8	1	ENSMUST00000072079.8	1	2047	0	2047	0	1097	1
ENSMUSG00000025911.14	chr1	9547948	9580673	+	3780	78	26	52	52	60	70	48	34	88	Adhfe1	ENSMUSG00000025911.14	5	ENSMUST00000144177.7,ENSMUST00000027044.14,ENSMUST00000130927.7,ENSMUST00000186467.1,ENSMUST00000190654.1	14,13,6,5,15	3225,2009,453,461,2006	26797,26837,5142,7000,30548	1779,710,154,196,453	9253,9253,2276,3374,9253	1384,114,200,117,1358	1,1,1,-1,-1
ENSMUSG00000079671.8	chr1	9560832	9631175	-	4910	61	93	82	35	82	87	59	73	76	2610203C22Rik	ENSMUSG00000079671.8	5	ENSMUST00000115480.7,ENSMUST00000145176.7,ENSMUST00000148585.7,ENSMUST00000153239.7,ENSMUST00000148310.2	5,4,3,4,4	1241,658,3472,593,559	69019,66974,27259,29564,27170	946,366,3262,263,240	55679,55679,17280,18269,15875	0,0,0,0,0	7,6,5,6,6
ENSMUSG00000081441.3	chr1	9574548	9575649	+	1102	1	2	2	1	3	0	0	0	5	Gm6161	ENSMUSG00000081441.3	1	ENSMUST00000121942.1	1	1101	0	1101	0	0	-1
ENSMUSG00000067879.3	chr1	9601199	9627143	+	3256	2242	5017	5343	5326	5638	2547	1535	2539	3873	3110035E14Rik	ENSMUSG00000067879.3	1	ENSMUST00000088666.3	6	3250	22694	2430	6362	618	1
ENSMUSG00000099827.1	chr1	9639255	9640582	-	1067	0	0	0	0	0	0	0	0	0	Gm29520	ENSMUSG00000099827.1	1	ENSMUST00000191209.1	2	1065	262	1011	262	0	4
ENSMUSG00000025912.16	chr1	9667415	9700209	-	5402	4147	4391	4229	4089	4353	4320	2935	2724	3135	Mybl1	ENSMUSG00000025912.16	5	ENSMUST00000088658.10,ENSMUST00000115468.8,ENSMUST00000160022.1,ENSMUST00000160451.1,ENSMUST00000188212.1	16,15,2,3,8	4964,2478,541,692,791	27830,28009,1937,4488,17000	2597,475,338,355,220	6543,6543,1937,3280,6230	0,0,0,0,0	16,15,4,5,10
ENSMUSG00000045210.8	chr1	9718622	9748382	-	9749	17131	20599	18622	16683	20382	20428	19938	20727	23753	Vcpip1	ENSMUSG00000045210.8	1	ENSMUST00000057438.6	3	9746	20014	6728	11616	0	3
ENSMUSG00000097893.8	chr1	9747648	9791924	+	3101	25	18	7	22	13	13	9	14	15	1700034P13Rik	ENSMUSG00000097893.8	7	ENSMUST00000181821.7,ENSMUST00000181358.7,ENSMUST00000191287.6,ENSMUST00000189431.1,ENSMUST00000207445.1,ENSMUST00000209020.1,ENSMUST00000189322.1	4,7,4,5,5,4,3	1992,1336,657,550,1141,260,376	42282,42026,22118,21958,42194,21865,7010	956,648,296,135,799,115,213	37092,27769,18108,18108,37092,18108,5665	0,0,0,0,0,0,0	-1,-1,-1,-1,-1,-1,-1
ENSMUSG00000025915.14	chr1	9798107	9900845	+	14311	2014	2359	2323	1992	2297	2459	1670	1896	2058	Sgk3	ENSMUSG00000025915.14	12	ENSMUST00000166384.7,ENSMUST00000188782.6,ENSMUST00000168907.7,ENSMUST00000188625.1,ENSMUST00000188738.6,ENSMUST00000188298.6,ENSMUST00000171265.7,ENSMUST00000188830.6,ENSMUST00000189050.1,ENSMUST00000097826.5,ENSMUST00000191338.1,ENSMUST00000188486.1	17,18,18,2,17,18,17,3,5,17,4,1	3689,3744,3761,3413,2786,3081,3663,449,732,2711,3591,3747	99047,98883,98941,28767,98647,98719,48908,16861,23501,48745,2019,0	2123,2050,2125,3325,898,1288,2123,217,296,1133,3410,3747	66885,38012,38012,28767,38012,38012,16746,16746,16746,16583,1006,0	1475,1037,1475,0,990,205,1475,0,0,1475,0,0	2,3,3,-1,3,3,2,-1,-1,2,-1,-1
ENSMUSG00000046334.4	chr1	9802197	9802553	-	357	22	43	13	24	18	13	23	10	13	Gm6195	ENSMUSG00000046334.4	1	ENSMUST00000063059.4	1	356	0	356	0	0	3
ENSMUSG00000088916.1	chr1	9834498	9834602	-	105	0	0	0	0	0	0	0	0	0	Gm22607	ENSMUSG00000088916.1	1	ENSMUST00000158291.1	1	104	0	104	0	0	3
ENSMUSG00000046101.16	chr1	9908638	9942085	+	5916	66	20	66	24	26	71	28	25	38	Mcmdc2	ENSMUSG00000046101.16	6	ENSMUST00000052843.11,ENSMUST00000171802.7,ENSMUST00000125294.8,ENSMUST00000140948.8,ENSMUST00000118098.2,ENSMUST00000183059.1	10,15,14,16,8,3	2816,2538,1989,3233,2064,746	11071,29778,29795,30182,7888,8088	1697,576,237,1174,831,576	3301,6519,6519,6519,3301,4815	1035,2032,1802,2064,1069,75	2,2,2,2,1,-1
ENSMUSG00000098234.7	chr1	9941959	9944118	-	1146	4698	3618	2776	3100	3364	4714	4155	2858	3248	Snhg6	ENSMUSG00000098234.7	5	ENSMUST00000182580.7,ENSMUST00000182819.7,ENSMUST00000182043.7,ENSMUST00000182498.7,ENSMUST00000182742.1	4,3,2,3,4	469,813,653,556,396	1690,387,219,1522,1696	196,613,366,366,124	1303,219,219,1303,1303	0,0,0,0,0	6,5,4,5,6
ENSMUSG00000093178.1	chr1	9942463	9942549	-	87	1533	1441	827	1099	1202	1390	1331	1076	1079	Snord87	ENSMUSG00000093178.1	1	ENSMUST00000175437.1	1	86	0	86	0	0	3
ENSMUSG00000099032.2	chr1	9960163	9967932	-	4193	15	16	15	18	3	15	14	26	5	Tcf24	ENSMUSG00000099032.2	2	ENSMUST00000185184.1,ENSMUST00000097824.2	2,1	4191,2638	3578,0	3358,2638	3578,0	0,-196	2,1
ENSMUSG00000104025.1	chr1	9967314	9968687	+	1374	0	0	0	0	2	0	0	0	0	E330040D14Rik	ENSMUSG00000104025.1	1	ENSMUST00000192299.1	1	1373	0	1373	0	0	-1
ENSMUSG00000025916.10	chr1	9968624	10009136	-	1523	54	82	89	46	67	74	65	78	96	Ppp1r42	ENSMUSG00000025916.10	6	ENSMUST00000147000.8,ENSMUST00000124874.7,ENSMUST00000027049.9,ENSMUST00000130102.7,ENSMUST00000176398.7,ENSMUST00000155163.1	3,8,9,7,6,5	538,1305,1416,934,726,779	16530,33524,39096,39371,29588,13288	307,307,307,218,166,218	9885,9437,9437,16661,9437,5619	296,0,0,0,0,0	3,7,9,5,8,7
ENSMUSG00000087199.1	chr1	9982387	9992366	+	656	0	0	0	0	0	0	0	0	0	Gm15818	ENSMUSG00000087199.1	1	ENSMUST00000134692.1	2	654	9325	602	9325	0	-1
ENSMUSG00000095780.1	chr1	10009814	10009917	-	104	0	0	0	0	0	0	0	0	0	Gm24674	ENSMUSG00000095780.1	1	ENSMUST00000179194.1	1	103	0	103	0	0	3
ENSMUSG00000025917.9	chr1	10024601	10038168	-	3766	17622	20434	16712	17610	18107	18047	17747	18879	20923	Cops5	ENSMUSG00000025917.9	7	ENSMUST00000027050.9,ENSMUST00000190155.6,ENSMUST00000186528.6,ENSMUST00000188619.1,ENSMUST00000139578.7,ENSMUST00000150509.2,ENSMUST00000191296.1	8,6,7,6,5,4,1	1690,871,955,765,2199,894,665	11836,9414,9788,6697,4819,4234,0	462,220,279,234,1504,283,665	3348,3348,3348,2756,2507,2756,0	0,434,-142,0,0,0,0	8,4,1,8,7,6,3
ENSMUSG00000056763.16	chr1	10037987	10136768	+	17553	9269	11048	8865	10481	9560	11323	10914	11506	12057	Cspp1	ENSMUSG00000056763.16	27	ENSMUST00000190610.1,ENSMUST00000191012.6,ENSMUST00000071087.11,ENSMUST00000143606.7,ENSMUST00000191360.6,ENSMUST00000117415.7,ENSMUST00000191521.6,ENSMUST00000118263.7,ENSMUST00000122156.7,ENSMUST00000190063.6,ENSMUST00000119714.7,ENSMUST00000134716.1,ENSMUST00000155974.7,ENSMUST00000186294.6,ENSMUST00000149214.2,ENSMUST00000190318.1,ENSMUST00000188249.6,ENSMUST00000153804.1,ENSMUST00000188449.6…	1,3,30,4,4,7,4,7,8,4,7,5,4,29,5,1,5,4,7,3,2,2,10,2,3,3,2	1355,342,4325,3379,633,1265,483,2155,2527,450,1261,536,441,3400,453,5008,854,821,531,644,334,310,1064,776,667,433,648	0,9186,94226,20166,20166,27591,18622,26048,26033,18631,26056,19632,18227,86252,9198,0,10581,8392,14811,1926,12356,4005,20233,530,3367,3069,1704	1355,124,834,3051,328,692,152,1550,1907,138,676,167,128,394,149,5008,564,572,133,437,185,174,146,659,495,297,388	0,6946,11194,11194,11194,11194,11194,11194,11194,11194,11194,11194,11194,12356,5510,0,5011,5011,5011,1228,12356,4005,9609,530,2423,2422,1704	0,0,3565,0,0,930,0,930,953,0,930,0,0,3400,0,0,0,0,312,0,0,0,788,0,0,0,0	-1,2,2,-1,-1,2,-1,2,2,-1,2,-1,2,1,-1,-1,-1,-1,-1,-1,-1,-1,-1,-1,-1,-1,-1
ENSMUSG00000102356.1	chr1	10057025	10057944	-	920	0	0	0	0	0	0	0	0	0	1700047N06Rik	ENSMUSG00000102356.1	1	ENSMUST00000194474.1	1	919	0	919	0	0	3
ENSMUSG00000067851.11	chr1	10137571	10232670	-	11318	7664	9573	8274	7354	8952	11015	7391	9166	9407	Arfgef1	ENSMUSG00000067851.11	8	ENSMUST00000088615.10,ENSMUST00000187417.1,ENSMUST00000142497.1,ENSMUST00000156563.1,ENSMUST00000128834.1,ENSMUST00000131556.1,ENSMUST00000186813.1,ENSMUST00000186720.1	38,3,5,2,2,20,1,3	6940,565,724,3524,456,3404,1161,807	88159,2446,6401,137,93,56191,0,4245	1425,306,249,3341,343,299,1161,540	15812,1471,4266,137,93,15812,0,3343	0,0,0,0,0,0,0,0	38,5,7,4,4,20,3,5
ENSMUSG00000088153.1	chr1	10166539	10166778	+	240	0	0	0	0	0	0	0	0	0	Gm26348	ENSMUSG00000088153.1	1	ENSMUST00000157528.1	1	239	0	239	0	0	-1
ENSMUSG00000102556.1	chr1	10197081	10198802	-	1722	102	131	57	114	122	67	67	136	54	Gm37569	ENSMUSG00000102556.1	1	ENSMUST00000192111.1	1	1721	0	1721	0	0	3
ENSMUSG00000042501.12	chr1	10324720	10719945	-	6840	0	0	1	0	3	3	0	2	0	Cpa6	ENSMUSG00000042501.12	4	ENSMUST00000153695.7,ENSMUST00000035577.6,ENSMUST00000147575.1,ENSMUST00000140938.1	10,11,2,2	1804,1921,4750,622	393421,393297,598,123917	591,584,4654,329	123917,123917,598,123917	0,0,0,0	3,11,4,4
ENSMUSG00000103810.1	chr1	10449245	10451989	-	2745	0	0	0	0	0	0	0	0	0	Gm38005	ENSMUSG00000103810.1	1	ENSMUST00000194845.1	1	2744	0	2744	0	0	3
ENSMUSG00000083422.1	chr1	10554098	10555553	-	1456	0	8	2	0	0	2	0	1	2	Gm15604	ENSMUSG00000083422.1	1	ENSMUST00000118350.1	1	1455	0	1455	0	0	3
ENSMUSG00000094979.1	chr1	10555554	10555660	-	107	0	0	0	0	0	0	0	0	0	Gm25253	ENSMUSG00000094979.1	1	ENSMUST00000179958.1	1	106	0	106	0	0	3
ENSMUSG00000081417.1	chr1	10695123	10695614	+	492	0	0	0	0	0	0	0	0	0	Gm15603	ENSMUSG00000081417.1	1	ENSMUST00000119252.1	1	491	0	491	0	0	-1
ENSMUSG00000103448.1	chr1	10782456	10784377	-	1922	0	0	0	0	0	0	0	0	0	Gm37133	ENSMUSG00000103448.1	1	ENSMUST00000192705.1	1	1921	0	1921	0	0	3
ENSMUSG00000100212.1	chr1	10805281	10806522	+	1242	0	0	0	0	0	0	0	0	0	Gm5522	ENSMUSG00000100212.1	1	ENSMUST00000189483.1	1	1241	0	1241	0	0	-1
ENSMUSG00000100648.1	chr1	10868688	10869446	+	759	1	2	4	1	2	0	2	0	7	Gm28659	ENSMUSG00000100648.1	1	ENSMUST00000188013.1	1	758	0	758	0	0	-1
ENSMUSG00000088585.1	chr1	10921670	10921760	+	91	0	0	0	0	0	0	0	0	0	Gm22963	ENSMUSG00000088585.1	1	ENSMUST00000157960.1	1	90	0	90	0	0	-1
ENSMUSG00000048960.13	chr1	10993465	11303681	+	16609	6883	9669	8470	6897	7671	8492	6340	8999	9252	Prex2	ENSMUSG00000048960.13	8	ENSMUST00000027056.11,ENSMUST00000190935.1,ENSMUST00000189822.1,ENSMUST00000187694.1,ENSMUST00000188189.6,ENSMUST00000187745.6,ENSMUST00000189385.6,ENSMUST00000188154.1	40,1,13,5,6,6,6,4	11013,3083,1504,2944,720,763,2443,839	299203,0,50037,16961,39111,39136,33188,13372	5973,3083,261,2106,190,297,1886,496	67417,0,10278,7013,18898,18898,18898,8388	4757,0,0,0,45,149,72,121	1,-1,-1,-1,-1,-1,-1,-1
ENSMUSG00000077318.1	chr1	11134111	11134238	-	128	0	0	0	0	0	0	0	0	0	Gm24173	ENSMUSG00000077318.1	1	ENSMUST00000104130.1	1	127	0	127	0	0	3
ENSMUSG00000101827.1	chr1	11223566	11224174	-	609	0	1	1	0	0	0	0	0	1	Gm28686	ENSMUSG00000101827.1	1	ENSMUST00000187404.1	1	608	0	608	0	0	3
ENSMUSG00000103494.1	chr1	11363926	11366964	-	3039	0	0	0	0	0	0	0	0	0	Gm37410	ENSMUSG00000103494.1	1	ENSMUST00000193623.1	1	3038	0	3038	0	0	3
ENSMUSG00000057715.13	chr1	11414105	11975901	+	9183	226	318	209	178	257	284	139	167	263	A830018L16Rik	ENSMUSG00000057715.13	10	ENSMUST00000171690.8,ENSMUST00000048613.13,ENSMUST00000150870.7,ENSMUST00000142117.2,ENSMUST00000141512.7,ENSMUST00000135014.7,ENSMUST00000137824.7,ENSMUST00000179089.7,ENSMUST00000141339.2,ENSMUST00000191437.1	8,14,2,4,11,7,14,13,6,3	6150,2765,656,1495,1805,6444,1866,1819,3560,541	181556,559031,103941,122100,517823,180908,559022,559069,77762,16784	4846,978,525,692,525,5470,474,474,3028,480	97281,151648,103941,97281,151648,97281,151648,151648,26445,9204	859,1366,0,0,678,857,1375,1328,551,0	1,1,-1,-1,1,1,1,1,-1,-1
ENSMUSG00000103825.1	chr1	11416918	11419388	+	2471	5	11	1	16	0	3	1	16	5	Gm38178	ENSMUSG00000103825.1	1	ENSMUST00000194502.1	1	2470	0	2470	0	0	-1
ENSMUSG00000099845.1	chr1	11608139	11608400	-	262	0	0	0	0	0	0	0	0	0	Gm29273	ENSMUSG00000099845.1	1	ENSMUST00000188880.1	1	261	0	261	0	0	3
ENSMUSG00000103561.1	chr1	11704207	11706350	+	2144	2	0	2	0	0	0	0	0	0	Gm38069	ENSMUSG00000103561.1	1	ENSMUST00000195360.1	1	2143	0	2143	0	0	-1
ENSMUSG00000101610.1	chr1	12120960	12121832	+	873	5	1	2	4	4	1	4	3	4	Gm7560	ENSMUSG00000101610.1	1	ENSMUST00000187748.1	1	872	0	872	0	0	-1
ENSMUSG00000093864.1	chr1	12374936	12375042	+	107	9	6	5	6	4	8	5	6	12	Gm22633	ENSMUSG00000093864.1	1	ENSMUST00000179834.1	1	106	0	106	0	0	-1
ENSMUSG00000098555.1	chr1	12425986	12426106	+	121	0	0	0	0	0	0	0	0	0	Mir6341	ENSMUSG00000098555.1	1	ENSMUST00000183490.1	1	120	0	120	0	0	-1
ENSMUSG00000097628.1	chr1	12565577	12566383	+	807	8	8	7	5	8	13	15	11	14	Gm2383	ENSMUSG00000097628.1	1	ENSMUST00000181461.1	1	806	0	806	0	0	-1
ENSMUSG00000098163.1	chr1	12655867	12656553	+	687	0	1	0	0	0	0	2	0	4	Gm6216	ENSMUSG00000098163.1	1	ENSMUST00000182390.1	1	686	0	686	0	0	-1
ENSMUSG00000097171.1	chr1	12667563	12673090	+	3200	0	0	0	0	0	0	0	0	0	Gm17644	ENSMUSG00000097171.1	1	ENSMUST00000181272.1	3	3197	2330	1629	2224	0	-1
ENSMUSG00000101314.1	chr1	12670324	12671176	-	853	0	0	0	0	0	0	0	0	0	Gm29663	ENSMUSG00000101314.1	1	ENSMUST00000186962.1	1	852	0	852	0	0	3
ENSMUSG00000016918.15	chr1	12692277	12861192	+	11294	12929	16995	18967	13143	14778	18649	11555	15918	15835	Sulf1	ENSMUSG00000016918.15	10	ENSMUST00000177608.7,ENSMUST00000180062.7,ENSMUST00000186051.6,ENSMUST00000187376.6,ENSMUST00000088585.9,ENSMUST00000189541.6,ENSMUST00000186405.6,ENSMUST00000186674.1,ENSMUST00000189447.1,ENSMUST00000185780.1	22,21,22,12,22,4,3,3,4,4	5576,4615,4541,2734,4608,362,812,2578,743,2678	163339,163433,155416,101723,137240,66723,57708,797,3726,15723	2380,1559,1600,946,1565,115,569,2350,301,2380	57391,93395,57391,57391,57391,57391,57391,480,2030,10358	2594,2594,2570,0,2594,0,0,0,0,1115	4,3,4,-1,4,4,3,-1,-1,-1
ENSMUSG00000025938.16	chr1	12866549	12992650	-	13137	7987	8219	6913	8843	8315	9628	11856	11891	14847	Slco5a1	ENSMUSG00000025938.16	8	ENSMUST00000188454.6,ENSMUST00000115403.8,ENSMUST00000115402.7,ENSMUST00000136197.7,ENSMUST00000146763.7,ENSMUST00000147606.2,ENSMUST00000133201.2,ENSMUST00000191566.1	10,9,8,6,4,5,4,3	8453,8500,3682,5117,3433,3610,656,3285	117648,116083,116147,107423,107798,107621,43057,12073	5779,5776,1597,2857,1769,1769,198,1830	45468,45468,45468,45468,49355,45468,26413,11931	0,0,0,0,0,0,0,0	10,9,8,6,3,5,6,5
ENSMUSG00000104518.1	chr1	13059401	13059951	-	551	0	0	0	0	0	0	0	0	0	Gm37162	ENSMUSG00000104518.1	1	ENSMUST00000191708.1	1	550	0	550	0	0	3
ENSMUSG00000069620.6	chr1	13062025	13062345	+	321	0	0	0	0	0	0	0	0	0	Gm5250	ENSMUSG00000069620.6	1	ENSMUST00000059065.9	1	320	0	320	0	0	-1
ENSMUSG00000099498.1	chr1	13068838	13078662	+	288	0	0	0	2	0	0	0	0	0	Gm29283	ENSMUSG00000099498.1	1	ENSMUST00000187394.1	4	284	9540	119	5832	0	-1
ENSMUSG00000042414.7	chr1	13113457	13127163	-	2564	1	4	0	0	0	1	0	3	0	Prdm14	ENSMUSG00000042414.7	1	ENSMUST00000047577.6	8	2556	11150	1030	3396	0	8
ENSMUSG00000005886.14	chr1	13139105	13374083	-	15642	7998	9236	8894	8467	8313	9816	5831	6248	6880	Ncoa2	ENSMUSG00000005886.14	11	ENSMUST00000081713.10,ENSMUST00000068304.12,ENSMUST00000006037.12,ENSMUST00000185275.1,ENSMUST00000146784.1,ENSMUST00000133232.1,ENSMUST00000147927.7,ENSMUST00000143603.7,ENSMUST00000139970.7,ENSMUST00000124088.1,ENSMUST00000145280.1	22,22,23,1,2,3,13,13,7,6,4	8149,7984,4874,1329,555,591,3416,3791,2937,2830,419	225185,226940,226734,0,1353,1998,206166,204313,187208,186593,109197	3667,3613,1269,1329,365,328,1269,1269,2079,2304,172	86158,87913,87913,0,1353,1582,87913,74216,86158,87913,74950	0,0,0,0,0,0,0,0,0,0,0	22,22,23,3,4,5,15,15,9,8,6
ENSMUSG00000103506.1	chr1	13177462	13179714	-	2253	78	104	70	71	76	96	83	40	107	Gm38376	ENSMUSG00000103506.1	1	ENSMUST00000195493.1	1	2252	0	2252	0	0	3
ENSMUSG00000103495.1	chr1	13234809	13236434	-	1626	84	87	68	127	83	72	162	248	260	Gm37409	ENSMUSG00000103495.1	1	ENSMUST00000195811.1	1	1625	0	1625	0	0	3
ENSMUSG00000099183.1	chr1	13262198	13262279	+	82	0	0	0	0	0	0	0	0	0	Gm27881	ENSMUSG00000099183.1	1	ENSMUST00000183805.1	1	81	0	81	0	0	-1
ENSMUSG00000102639.1	chr1	13289812	13290506	-	695	7	6	1	1	1	12	12	5	5	Gm38223	ENSMUSG00000102639.1	1	ENSMUST00000194484.1	1	694	0	694	0	0	3
ENSMUSG00000104170.1	chr1	13297036	13298907	-	1872	32	57	45	64	38	65	93	90	108	Gm37702	ENSMUSG00000104170.1	1	ENSMUST00000194357.1	1	1871	0	1871	0	0	3
ENSMUSG00000087782.1	chr1	13334498	13334609	-	112	0	2	0	0	0	0	0	1	0	Gm23169	ENSMUSG00000087782.1	1	ENSMUST00000157157.1	1	111	0	111	0	0	3
ENSMUSG00000103085.1	chr1	13343563	13348204	-	4642	126	146	73	131	153	113	287	241	286	Gm38120	ENSMUSG00000103085.1	1	ENSMUST00000195506.1	1	4641	0	4641	0	0	3
ENSMUSG00000102664.1	chr1	13354483	13356730	-	2248	43	33	46	57	44	46	90	109	89	Gm38380	ENSMUSG00000102664.1	1	ENSMUST00000195718.1	1	2247	0	2247	0	0	3
ENSMUSG00000101476.1	chr1	13376070	13388413	+	681	0	7	0	0	2	0	4	4	0	Gm29570	ENSMUSG00000101476.1	1	ENSMUST00000185813.1	2	679	11664	444	11664	0	-1
ENSMUSG00000101171.1	chr1	13407012	13407655	-	644	0	0	0	0	0	0	1	0	0	Gm7593	ENSMUSG00000101171.1	1	ENSMUST00000187246.1	1	643	0	643	0	0	3
ENSMUSG00000025935.10	chr1	13564698	13589910	-	3162	10950	12004	9283	10125	11701	11183	11184	11453	11368	Tram1	ENSMUSG00000025935.10	3	ENSMUST00000027068.10,ENSMUST00000185447.1,ENSMUST00000188377.1	11,4,4	2927,590,494	22285,3064,11263	1698,308,275	8514,1648,8514	0,0,0	11,6,3
ENSMUSG00000025937.6	chr1	13623330	13660546	-	4566	1623	1951	1482	1216	1399	1544	1516	1539	1595	Lactb2	ENSMUSG00000025937.6	2	ENSMUST00000027071.6,ENSMUST00000156222.1	7,2	4487,398	32729,8018	3574,218	9445,8018	0,0	7,4
ENSMUSG00000102982.1	chr1	13641483	13642748	-	1266	3	12	28	17	7	11	14	6	12	Gm38319	ENSMUSG00000102982.1	1	ENSMUST00000194537.1	1	1265	0	1265	0	0	3
ENSMUSG00000067813.3	chr1	13668771	13701723	+	1926	5	11	0	4	3	4	2	5	2	Xkr9	ENSMUSG00000067813.3	1	ENSMUST00000088542.3	4	1922	31030	968	16479	1119	2
ENSMUSG00000077368.1	chr1	13774334	13774464	-	131	0	0	0	0	0	0	0	0	0	Gm26273	ENSMUSG00000077368.1	1	ENSMUST00000104180.1	1	130	0	130	0	0	3
ENSMUSG00000097711.1	chr1	13785883	13786879	-	997	29	28	22	26	26	17	15	18	39	Gm5523	ENSMUSG00000097711.1	1	ENSMUST00000180415.1	1	996	0	996	0	0	3
ENSMUSG00000102166.1	chr1	13846871	13849119	-	2249	6	5	5	5	5	6	2	10	3	Gm36947	ENSMUSG00000102166.1	1	ENSMUST00000194709.1	1	2248	0	2248	0	0	3
ENSMUSG00000089358.1	chr1	13932378	13932685	+	308	0	0	0	0	0	0	0	0	0	Gm25491	ENSMUSG00000089358.1	1	ENSMUST00000158733.1	1	307	0	307	0	0	-1
ENSMUSG00000104209.1	chr1	14109215	14112819	-	3605	0	0	0	0	0	0	0	0	0	Gm37400	ENSMUSG00000104209.1	1	ENSMUST00000193148.1	1	3604	0	3604	0	0	3
ENSMUSG00000025932.14	chr1	14168954	14310235	-	7808	1533	2075	1916	1662	1665	1841	1076	1162	1420	Eya1	ENSMUSG00000025932.14	9	ENSMUST00000027066.12,ENSMUST00000168081.8,ENSMUST00000080664.13,ENSMUST00000190337.6,ENSMUST00000189526.1,ENSMUST00000188857.6,ENSMUST00000185453.6,ENSMUST00000187790.1,ENSMUST00000185329.1	18,18,17,17,4,7,7,7,2	4329,4348,3409,2182,426,718,657,657,3675	136917,136929,137044,131745,23140,51301,33264,38404,5172	2042,2038,1330,353,175,194,145,190,3270	24211,24211,24211,24211,20509,21227,19572,19572,5172	0,0,0,0,76,0,0,0,0	18,18,17,17,4,9,9,9,4
ENSMUSG00000095853.1	chr1	14182578	14182677	+	100	0	0	0	0	0	0	0	0	0	Gm22616	ENSMUSG00000095853.1	1	ENSMUST00000179783.1	1	99	0	99	0	0	-1
ENSMUSG00000102588.1	chr1	14255552	14255990	-	439	1	12	11	3	6	8	0	4	10	Gm37444	ENSMUSG00000102588.1	1	ENSMUST00000193605.1	1	438	0	438	0	0	3
ENSMUSG00000054493.2	chr1	14752937	14776931	+	3566	0	2	3	2	0	11	3	0	6	Gm9947	ENSMUSG00000054493.2	2	ENSMUST00000187401.1,ENSMUST00000067599.1	5,1	682,2919	23312,0	408,2919	17580,0	0,0	-1,-1
ENSMUSG00000025930.6	chr1	14753346	14755992	-	2546	34	19	15	32	15	26	16	15	31	Msc	ENSMUSG00000025930.6	4	ENSMUST00000027062.6,ENSMUST00000190719.1,ENSMUST00000188982.1,ENSMUST00000190471.1	2,3,1,1	1739,738,730,1225	905,869,0,0	979,579,730,1225	905,688,0,0	0,583,0,0	2,2,3,3
ENSMUSG00000103492.1	chr1	14788645	14792965	+	4321	0	0	4	0	2	1	0	0	0	Gm37412	ENSMUSG00000103492.1	1	ENSMUST00000194866.1	1	4320	0	4320	0	0	-1
ENSMUSG00000081201.1	chr1	14839869	14840156	-	288	21	13	15	32	5	16	15	11	4	Smt3h2-ps4	ENSMUSG00000081201.1	1	ENSMUST00000121569.1	1	287	0	287	0	0	3
ENSMUSG00000082193.1	chr1	14865072	14865965	+	894	115	125	87	123	129	117	154	154	158	Rpl5-ps1	ENSMUSG00000082193.1	1	ENSMUST00000121367.1	1	893	0	893	0	0	-1
ENSMUSG00000032769.4	chr1	14872648	14918862	-	4263	376	525	373	344	385	393	409	465	484	Trpa1	ENSMUSG00000032769.4	1	ENSMUST00000041447.4	27	4236	41978	1080	6206	0	27
ENSMUSG00000088159.1	chr1	15019040	15019159	-	120	0	0	0	0	0	0	0	0	0	Gm26345	ENSMUSG00000088159.1	1	ENSMUST00000157534.1	1	119	0	119	0	0	3
ENSMUSG00000073737.3	chr1	15268802	15269797	-	996	10	8	4	5	6	2	3	8	2	Gm10566	ENSMUSG00000073737.3	1	ENSMUST00000086739.5	1	995	0	995	0	0	3
ENSMUSG00000092083.4	chr1	15287254	15723750	+	15165	1991	2284	2071	2129	2369	2199	1083	1188	1343	Kcnb2	ENSMUSG00000092083.4	2	ENSMUST00000175681.2,ENSMUST00000170146.2	3,2	3960,14843	421334,396455	3063,14265	396455,396455	2722,2722	2,1
ENSMUSG00000102937.1	chr1	15364302	15365834	+	1533	2	4	5	4	5	0	1	1	0	Gm38116	ENSMUSG00000102937.1	1	ENSMUST00000193873.1	1	1532	0	1532	0	0	-1
ENSMUSG00000104149.1	chr1	15556249	15558337	+	2089	15	1	16	14	1	11	2	5	16	Gm37138	ENSMUSG00000104149.1	1	ENSMUST00000194564.1	1	2088	0	2088	0	0	-1
ENSMUSG00000088829.1	chr1	15685935	15686046	-	112	0	0	0	0	0	0	0	0	0	Gm25227	ENSMUSG00000088829.1	1	ENSMUST00000158204.1	1	111	0	111	0	0	3
ENSMUSG00000077377.1	chr1	15757832	15757963	+	132	0	0	0	0	0	0	0	0	0	Gm25168	ENSMUSG00000077377.1	1	ENSMUST00000104189.1	1	131	0	131	0	0	-1
ENSMUSG00000101652.1	chr1	15760122	15760668	-	251	3	0	1	0	2	3	2	8	0	Gm6060	ENSMUSG00000101652.1	1	ENSMUST00000188671.1	2	249	297	141	297	0	4
ENSMUSG00000100814.1	chr1	15760761	15760860	+	100	0	0	0	0	0	10	0	0	0	Gm28669	ENSMUSG00000100814.1	1	ENSMUST00000188400.1	1	99	0	99	0	0	-1
ENSMUSG00000025925.14	chr1	15805646	15844052	+	4608	4638	6510	4894	5001	4944	5492	3685	4184	4011	Terf1	ENSMUSG00000025925.14	4	ENSMUST00000188371.6,ENSMUST00000186565.6,ENSMUST00000027057.7,ENSMUST00000188684.1	10,7,9,5	2258,961,1572,2903	36148,15397,36234,11559	1131,300,549,2452	11744,5305,11744,5305	1256,0,1170,0	1,-1,1,-1
ENSMUSG00000104379.1	chr1	15853331	15856499	+	3169	24	30	16	36	29	24	38	22	20	Gm37509	ENSMUSG00000104379.1	1	ENSMUST00000194867.1	1	3168	0	3168	0	0	-1
ENSMUSG00000032719.4	chr1	15853862	15892722	-	2748	39	33	30	32	46	75	40	29	32	Sbspon	ENSMUSG00000032719.4	1	ENSMUST00000040695.4	5	2743	36117	2000	23295	0	5
ENSMUSG00000088943.1	chr1	15879530	15879832	+	303	0	0	0	0	0	0	0	0	0	Gm23259	ENSMUSG00000088943.1	1	ENSMUST00000158318.1	1	302	0	302	0	0	-1
ENSMUSG00000100652.1	chr1	16053335	16053887	+	553	0	0	3	0	2	1	0	0	0	Gm7634	ENSMUSG00000100652.1	1	ENSMUST00000185778.1	1	552	0	552	0	0	-1
ENSMUSG00000067795.13	chr1	16065979	16093325	-	2063	30	43	50	22	26	71	31	53	68	4930444P10Rik	ENSMUSG00000067795.13	3	ENSMUST00000115367.7,ENSMUST00000145070.7,ENSMUST00000151004.1	4,6,5	864,1838,996	14369,25508,26350	382,842,351	9713,10464,11981	0,0,0	4,6,5
ENSMUSG00000043716.13	chr1	16101295	16104662	-	2687	304267	358326	291491	309202	315739	304737	313932	314069	357291	Rpl7	ENSMUSG00000043716.13	6	ENSMUST00000140597.7,ENSMUST00000058437.13,ENSMUST00000141217.1,ENSMUST00000151017.1,ENSMUST00000149566.1,ENSMUST00000125005.1	2,7,5,2,6,4	419,1156,1592,1227,832,780	368,2211,1504,93,1615,1113	355,297,642,1071,174,516	368,681,681,93,554,681	0,0,0,0,0,0	4,6,7,4,8,6
ENSMUSG00000025921.7	chr1	16105774	16133734	+	4160	2272	2810	2540	2004	2349	2621	2298	2526	3397	Rdh10	ENSMUSG00000025921.7	2	ENSMUST00000027053.7,ENSMUST00000152626.1	6,2	3581,1957	24379,88	2440,1253	20135,88	1020,0	1,-1
ENSMUSG00000104165.1	chr1	16208197	16210517	-	2321	1	0	0	0	0	0	0	0	0	Gm38249	ENSMUSG00000104165.1	1	ENSMUST00000192560.1	1	2320	0	2320	0	0	3
ENSMUSG00000100868.1	chr1	16228506	16244062	+	1515	0	0	0	0	0	0	0	0	0	Gm28095	ENSMUSG00000100868.1	1	ENSMUST00000186343.1	3	1512	14044	1286	13242	0	-1
ENSMUSG00000025920.19	chr1	16228674	16520112	-	6747	5937	7348	6717	6402	6389	6509	3300	3872	4483	Stau2	ENSMUSG00000025920.19	17	ENSMUST00000162751.7,ENSMUST00000054668.12,ENSMUST00000162627.7,ENSMUST00000027052.12,ENSMUST00000162435.7,ENSMUST00000159558.7,ENSMUST00000128957.8,ENSMUST00000131257.8,ENSMUST00000115360.7,ENSMUST00000162007.7,ENSMUST00000127420.7,ENSMUST00000149320.8,ENSMUST00000151888.7,ENSMUST00000153966.8,ENSMUST00000115359.9,ENSMUST00000145092.7,ENSMUST00000144138.3	14,15,14,13,13,12,12,10,5,11,12,13,4,5,5,4,5	3016,2892,2759,2750,2722,3889,3895,3606,2193,2953,3069,2201,365,450,1146,560,580	287616,287535,287665,287746,288574,171915,171866,172890,29004,171996,171885,171512,124762,79188,58399,59357,59227	1192,1065,1062,1056,1050,2604,2525,2440,1813,1720,1712,417,135,159,704,315,206	114613,114613,114613,114613,114613,46148,46113,56807,20068,46148,46148,46113,68884,23192,23192,46148,23192	0,0,0,0,0,0,0,0,0,0,0,0,0,0,0,0,0	14,15,14,13,13,12,12,10,7,11,5,13,6,7,5,4,5
ENSMUSG00000089982.7	chr1	16253592	16267921	+	1003	0	0	0	0	0	0	0	0	0	Gm7568	ENSMUSG00000089982.7	3	ENSMUST00000161626.1,ENSMUST00000160446.7,ENSMUST00000159190.1	3,4,3	412,705,227	4857,13624,5001	214,550,145	4667,9264,4811	0,0,0	-1,-1,-1
ENSMUSG00000025939.17	chr1	16540790	16619489	-	4930	9871	10762	7937	9654	10519	9832	8771	8925	9456	Ube2w	ENSMUSG00000025939.17	6	ENSMUST00000182554.7,ENSMUST00000182080.1,ENSMUST00000117146.7,ENSMUST00000133639.1,ENSMUST00000136455.8,ENSMUST00000132919.1	7,4,6,6,4,2	1501,407,2175,487,1513,421	77021,20653,47532,36836,33613,16884	999,130,1500,155,1273,374	37895,12762,16884,16884,16884,16884	984,0,0,254,0,0	7,6,6,4,6,4
ENSMUSG00000102457.1	chr1	16618560	16621539	+	2980	15	11	11	34	14	29	38	22	52	Gm38342	ENSMUSG00000102457.1	1	ENSMUST00000195710.1	1	2979	0	2979	0	0	-1
ENSMUSG00000079658.9	chr1	16641725	16657042	-	3026	14505	16425	13189	13502	14598	14639	12707	13164	14831	Tceb1	ENSMUSG00000079658.9	11	ENSMUST00000188641.6,ENSMUST00000115352.9,ENSMUST00000186948.6,ENSMUST00000187910.6,ENSMUST00000185771.6,ENSMUST00000185393.6,ENSMUST00000186701.1,ENSMUST00000188987.6,ENSMUST00000186541.1,ENSMUST00000190986.1,ENSMUST00000191535.1	4,4,4,5,5,3,4,3,4,2,2	2010,956,637,615,737,363,530,347,406,382,321	13149,13319,13239,13254,12986,4334,12623,9717,9554,8815,8985	1753,711,336,309,287,143,329,217,163,326,271	8815,8985,8905,8985,8289,2208,8289,8815,8289,8815,8985	0,0,0,0,0,0,0,0,0,0,0	4,4,4,5,5,5,6,5,6,4,4
ENSMUSG00000097744.1	chr1	16657552	16662278	+	2788	6	2	4	2	7	8	15	2	18	D030040B21Rik	ENSMUSG00000097744.1	1	ENSMUST00000181371.1	4	2784	1942	2226	1372	0	-1
ENSMUSG00000100959.1	chr1	16662980	16663662	-	683	0	0	0	0	0	0	0	0	1	Gm7654	ENSMUSG00000100959.1	1	ENSMUST00000186738.1	1	682	0	682	0	0	3
ENSMUSG00000025940.6	chr1	16665207	16678275	+	1820	6337	6398	5932	5612	6193	7158	5546	5222	6081	Tmem70	ENSMUSG00000025940.6	4	ENSMUST00000177501.1,ENSMUST00000177532.1,ENSMUST00000065373.5,ENSMUST00000176451.1	3,3,3,2	1633,514,1707,372	11355,11491,11358,203	1227,247,1307,269	9195,9195,9195,203	762,0,759,0	1,-1,1,-1
ENSMUSG00000025779.10	chr1	16688051	16709611	+	1021	83	57	80	66	69	73	103	89	76	Ly96	ENSMUSG00000025779.10	3	ENSMUST00000191260.1,ENSMUST00000026881.10,ENSMUST00000190366.1	3,5,5	663,627,424	3233,20551,20605	282,186,111	3065,9022,9076	0,478,424	-1,1,1
ENSMUSG00000100093.1	chr1	16758205	16758623	-	419	0	0	0	0	0	0	1	0	0	Gm29649	ENSMUSG00000100093.1	1	ENSMUST00000185649.1	1	418	0	418	0	0	3
ENSMUSG00000091020.3	chr1	16768279	16770138	-	1860	18	23	12	12	24	51	10	16	42	Gm5828	ENSMUSG00000091020.3	1	ENSMUST00000071842.9	1	1859	0	1859	0	0	3
ENSMUSG00000101640.1	chr1	16898185	17091631	+	176	0	0	0	0	0	0	0	0	0	Gm28376	ENSMUSG00000101640.1	1	ENSMUST00000186604.1	3	173	193273	108	136360	0	-1
ENSMUSG00000104133.1	chr1	16930970	16931796	+	827	0	3	0	0	0	0	0	0	0	4921511E07Rik	ENSMUSG00000104133.1	1	ENSMUST00000194790.1	1	826	0	826	0	0	-1
ENSMUSG00000042686.5	chr1	16964560	17097889	-	4998	1979	2606	2338	1884	2307	2289	2095	2083	2143	Jph1	ENSMUSG00000042686.5	2	ENSMUST00000186024.1,ENSMUST00000038382.4	4,5	610,4804	39049,98147	328,2621	19896,75141	204,0	2,5
ENSMUSG00000100110.1	chr1	17124747	17128956	+	359	0	0	0	0	0	0	0	0	0	Gm28783	ENSMUSG00000100110.1	1	ENSMUST00000188872.1	2	357	3852	238	3852	0	-1
ENSMUSG00000025777.8	chr1	17145362	17164271	+	7731	9336	10098	9663	10792	10877	10447	6984	6482	10355	Gdap1	ENSMUSG00000025777.8	4	ENSMUST00000026879.7,ENSMUST00000150457.1,ENSMUST00000189736.1,ENSMUST00000189465.1	6,3,6,1	3943,2159,1052,3679	14966,11181,15111,0	3144,1783,504,3679	9833,9833,9978,0	1071,0,180,0	1,-1,1,-1
ENSMUSG00000099899.1	chr1	17168403	17173103	+	1011	0	5	0	0	0	0	1	2	1	Gm28784	ENSMUSG00000099899.1	1	ENSMUST00000187817.1	4	1007	3693	379	1643	0	-1
ENSMUSG00000100272.1	chr1	17250114	17250492	-	379	0	0	0	0	0	0	0	0	0	Gm28785	ENSMUSG00000100272.1	1	ENSMUST00000187478.1	1	378	0	378	0	0	3
ENSMUSG00000100398.1	chr1	17394958	17395429	+	472	1	3	0	1	1	2	0	2	1	Gm5251	ENSMUSG00000100398.1	1	ENSMUST00000188959.1	1	471	0	471	0	0	-1
ENSMUSG00000101589.1	chr1	17397412	17400281	-	2870	113	162	105	127	108	228	58	58	91	Rbm6-ps1	ENSMUSG00000101589.1	1	ENSMUST00000186192.1	1	2869	0	2869	0	0	3
ENSMUSG00000102048.1	chr1	17429043	17429528	-	486	1	1	2	10	7	4	1	1	5	Gm6075	ENSMUSG00000102048.1	1	ENSMUST00000186816.1	1	485	0	485	0	0	3
ENSMUSG00000089534.1	chr1	17520001	17520111	+	111	0	0	0	0	0	0	0	0	0	Gm25166	ENSMUSG00000089534.1	1	ENSMUST00000158909.1	1	110	0	110	0	0	-1
ENSMUSG00000067780.3	chr1	17601901	17630939	+	6923	19	25	40	33	42	31	22	20	22	Pi15	ENSMUSG00000067780.3	1	ENSMUST00000088476.3	6	6917	22121	6104	16899	805	2
ENSMUSG00000100053.1	chr1	17615084	17641081	-	4218	9	6	7	10	12	7	0	19	5	Gm28154	ENSMUSG00000100053.1	1	ENSMUST00000186267.1	4	4214	21783	3674	15137	0	6
ENSMUSG00000085125.7	chr1	17676027	17727646	-	8345	61	131	58	68	68	93	51	81	82	Gm16070	ENSMUSG00000085125.7	3	ENSMUST00000155588.7,ENSMUST00000127328.1,ENSMUST00000149914.1	7,5,2	1895,5205,2144	49362,29537,127	1077,4249,1988	19892,14505,127	0,0,0	9,7,4
ENSMUSG00000025776.13	chr1	17727045	17766344	+	4515	2815	5301	4182	3008	3290	5724	3312	4352	4515	Crispld1	ENSMUSG00000025776.13	3	ENSMUST00000159958.7,ENSMUST00000160305.7,ENSMUST00000095075.4	15,5,15	3102,807,4457	35428,18027,34799	1512,320,2281	16440,16440,16440	1489,0,1489	2,3,2
ENSMUSG00000099895.1	chr1	17741915	17805417	-	629	0	0	0	0	8	0	0	0	0	Gm28153	ENSMUSG00000099895.1	1	ENSMUST00000189853.1	3	626	62876	430	53402	0	5
ENSMUSG00000100554.1	chr1	17947041	17948439	+	1399	1	6	2	1	3	2	2	2	4	Gm7690	ENSMUSG00000100554.1	1	ENSMUST00000190885.1	1	1398	0	1398	0	0	-1
ENSMUSG00000099473.1	chr1	17993010	17999622	-	586	218	331	301	519	387	333	77	89	107	Gm18775	ENSMUSG00000099473.1	1	ENSMUST00000190763.1	3	583	6029	249	5595	0	5
ENSMUSG00000099591.1	chr1	17993813	17997483	+	2557	0	0	0	0	1	0	0	1	0	Gm17969	ENSMUSG00000099591.1	1	ENSMUST00000185706.1	2	2555	1115	1913	1115	0	-1
ENSMUSG00000109887.1	chr1	17994462	18059056	-	2570	580	710	689	1136	902	746	174	213	306	RP24-571A14.6	ENSMUSG00000109887.1	3	ENSMUST00000209898.1,ENSMUST00000209405.1,ENSMUST00000191057.1	3,4,2	1711,2457,664	38829,62137,23308	1219,1219,589	35150,35150,23308	0,0,0	5,6,4
ENSMUSG00000102001.1	chr1	18005961	18016186	-	199	2	5	10	6	0	1	0	0	0	Gm28755	ENSMUSG00000102001.1	1	ENSMUST00000185773.1	3	196	10029	83	6330	0	5
ENSMUSG00000101717.2	chr1	18048100	18058269	-	142	50	60	63	88	73	64	3	20	37	Gm28756	ENSMUSG00000101717.2	1	ENSMUST00000188360.1	2	140	10029	74	10029	0	4
ENSMUSG00000025774.14	chr1	18115191	18145902	-	2737	0	4	1	6	20	2	0	15	0	Crisp4	ENSMUSG00000025774.14	4	ENSMUST00000130669.1,ENSMUST00000026876.12,ENSMUST00000115340.7,ENSMUST00000115344.1	7,8,7,9	2607,1244,1172,951	28098,29467,20675,29351	1607,565,552,156	8792,8792,6982,6982	0,0,0,0	9,8,7,9
ENSMUSG00000070977.4	chr1	18210053	18223564	-	219	0	0	0	0	0	0	0	0	0	Defb44-ps	ENSMUSG00000070977.4	1	ENSMUST00000126871.1	2	217	13294	177	13294	0	4
ENSMUSG00000073735.1	chr1	18236473	18237443	-	258	0	0	0	0	0	0	0	1	0	Defb18	ENSMUSG00000073735.1	1	ENSMUST00000097818.1	2	256	714	187	714	0	2
ENSMUSG00000067773.6	chr1	18250980	18265138	-	610	0	0	0	0	5	4	0	6	0	Defb41	ENSMUSG00000067773.6	2	ENSMUST00000088463.1,ENSMUST00000097817.3	2,2	465,196	13693,4360	353,142	13693,4360	0,0	2,2
ENSMUSG00000101685.1	chr1	18262395	18263379	-	985	1	2	0	3	0	0	0	1	0	Gm17837	ENSMUSG00000101685.1	1	ENSMUST00000186435.1	1	984	0	984	0	0	3
ENSMUSG00000101738.2	chr1	18307984	18313686	+	200	3	0	0	0	0	0	0	0	7	Gm29006	ENSMUSG00000101738.2	1	ENSMUST00000187966.2	2	198	5504	102	5504	0	-1
ENSMUSG00000101306.1	chr1	18708428	18709336	+	909	0	0	0	0	0	0	0	0	0	Gm5252	ENSMUSG00000101306.1	1	ENSMUST00000189030.1	1	908	0	908	0	0	-1
ENSMUSG00000088800.1	chr1	18969762	18969833	-	72	0	0	0	0	0	0	0	0	0	Gm24075	ENSMUSG00000088800.1	1	ENSMUST00000158175.1	1	71	0	71	0	0	3
ENSMUSG00000101644.1	chr1	19037266	19037377	+	112	0	0	0	0	0	0	0	0	0	Gm28343	ENSMUSG00000101644.1	1	ENSMUST00000185386.1	1	111	0	111	0	0	-1
ENSMUSG00000099433.1	chr1	19062857	19063135	+	279	0	0	0	0	0	0	0	0	0	Gm28344	ENSMUSG00000099433.1	1	ENSMUST00000185704.1	1	278	0	278	0	0	-1
ENSMUSG00000089787.2	chr1	19063300	19104840	-	918	0	2	2	4	2	0	0	0	0	Gm15825	ENSMUSG00000089787.2	1	ENSMUST00000159108.2	4	914	40626	362	29206	0	6
ENSMUSG00000042596.7	chr1	19103022	19166346	+	1954	130	199	289	559	396	155	26	13	20	Tfap2d	ENSMUSG00000042596.7	2	ENSMUST00000037294.7,ENSMUST00000149505.1	8,6	1753,739	61571,40447	497,192	23557,23557	1351,0	1,-1
ENSMUSG00000100720.1	chr1	19153422	19153966	-	545	24	31	12	20	21	23	11	29	17	Gm10075	ENSMUSG00000100720.1	1	ENSMUST00000162030.1	1	544	0	544	0	0	3
ENSMUSG00000025927.13	chr1	19208914	19238576	+	6338	160	318	320	263	219	266	225	375	304	Tfap2b	ENSMUSG00000025927.13	5	ENSMUST00000027059.10,ENSMUST00000187754.6,ENSMUST00000064976.5,ENSMUST00000191068.1,ENSMUST00000186972.1	7,8,7,2,2	5856,3015,1939,608,590	23806,26108,20631,1528,4784	4526,1475,574,491,530	7183,7183,7183,1528,4784	1373,1354,1319,0,0	1,1,1,-1,-1
ENSMUSG00000100538.1	chr1	19242725	19243769	+	202	0	0	0	0	0	0	0	0	0	Gm28340	ENSMUSG00000100538.1	1	ENSMUST00000189218.1	2	200	844	147	844	0	-1
ENSMUSG00000101117.1	chr1	19320226	19320697	-	472	1	0	0	0	0	0	0	0	0	Gm28341	ENSMUSG00000101117.1	1	ENSMUST00000190883.1	1	471	0	471	0	0	3
ENSMUSG00000100204.1	chr1	19330939	19333184	+	2246	42	33	17	29	44	25	34	25	31	Gm4849	ENSMUSG00000100204.1	1	ENSMUST00000188428.1	1	2245	0	2245	0	0	-1
ENSMUSG00000084668.1	chr1	19513855	19513919	-	65	0	0	0	0	0	0	0	0	0	Gm24633	ENSMUSG00000084668.1	1	ENSMUST00000122719.1	1	64	0	64	0	0	3
ENSMUSG00000102597.1	chr1	19614269	19616767	+	2499	0	0	0	0	0	0	0	0	0	Gm38382	ENSMUSG00000102597.1	1	ENSMUST00000193790.1	1	2498	0	2498	0	0	-1
ENSMUSG00000043760.16	chr1	20057779	20618064	-	14310	7	2	0	3	2	1	2	4	9	Pkhd1	ENSMUSG00000043760.16	4	ENSMUST00000088448.11,ENSMUST00000132647.1,ENSMUST00000147480.7,ENSMUST00000128051.1	67,5,6,6	12868,610,1630,915	547417,34116,23481,10828	1601,191,1015,324	80071,17735,14351,4275	0,0,0,0	67,7,8,8
ENSMUSG00000104095.1	chr1	20062070	20065548	-	3479	0	0	0	0	0	0	0	0	0	Gm37315	ENSMUSG00000104095.1	1	ENSMUST00000194347.1	1	3478	0	3478	0	0	3
ENSMUSG00000089914.2	chr1	20356452	20392300	+	788	0	0	0	0	0	0	0	0	0	4930486I03Rik	ENSMUSG00000089914.2	1	ENSMUST00000161509.2	3	785	35063	408	24390	0	-1
ENSMUSG00000090142.2	chr1	20444258	20444810	-	553	5	9	5	7	13	7	5	12	3	Gm15795	ENSMUSG00000090142.2	1	ENSMUST00000160969.2	1	552	0	552	0	0	3
ENSMUSG00000070175.1	chr1	20444811	20444912	-	102	0	0	0	0	0	0	0	0	0	Gm24162	ENSMUSG00000070175.1	1	ENSMUST00000093665.1	1	101	0	101	0	0	3
ENSMUSG00000065559.1	chr1	20679010	20679082	+	73	0	0	0	0	0	0	0	0	0	Mir206	ENSMUSG00000065559.1	1	ENSMUST00000083625.1	1	72	0	72	0	0	-1
ENSMUSG00000099906.1	chr1	20679023	20684298	+	5276	0	0	0	3	0	5	2	0	0	Gm28653	ENSMUSG00000099906.1	1	ENSMUST00000185494.1	1	5275	0	5275	0	0	-1
ENSMUSG00000065480.1	chr1	20682769	20682887	+	119	0	0	0	0	0	0	0	0	0	Mir133b	ENSMUSG00000065480.1	1	ENSMUST00000083546.1	1	118	0	118	0	0	-1
ENSMUSG00000025929.4	chr1	20730905	20734496	+	1171	0	0	0	0	0	0	0	0	0	Il17a	ENSMUSG00000025929.4	1	ENSMUST00000027061.4	3	1168	2423	874	1315	474	1
ENSMUSG00000041872.9	chr1	20777146	20790617	-	2022	7	0	7	1	0	4	0	1	6	Il17f	ENSMUSG00000041872.9	4	ENSMUST00000039046.9,ENSMUST00000191111.1,ENSMUST00000189301.1,ENSMUST00000190692.1	3,2,5,3	1175,588,820,601	5949,1287,12014,2505	858,325,221,355	4662,1287,5829,1733	0,0,0,0	3,4,7,5
ENSMUSG00000041859.10	chr1	20802968	20820312	-	3752	48712	60304	51146	51456	47859	56869	50978	54173	53726	Mcm3	ENSMUSG00000041859.10	5	ENSMUST00000053266.10,ENSMUST00000185296.1,ENSMUST00000188112.1,ENSMUST00000191061.1,ENSMUST00000190421.1	17,16,1,2,2	3014,3415,715,605,898	14330,13872,0,1163,356	686,681,715,489,677	2226,2226,0,1163,356	0,0,0,0,0	17,18,3,4,4
ENSMUSG00000099714.1	chr1	20821331	20822516	+	1186	3	0	4	1	6	5	0	1	6	Gm20587	ENSMUSG00000099714.1	1	ENSMUST00000186367.1	1	1185	0	1185	0	0	-1
ENSMUSG00000102121.1	chr1	20836661	20839689	+	833	0	0	0	0	0	0	0	0	0	Gm28065	ENSMUSG00000102121.1	1	ENSMUST00000185290.1	3	830	2198	302	1890	0	-1
ENSMUSG00000088858.1	chr1	20842535	20842666	-	132	0	0	0	0	0	0	0	0	0	Gm24723	ENSMUSG00000088858.1	1	ENSMUST00000158233.1	1	131	0	131	0	0	3
ENSMUSG00000097934.1	chr1	20888650	20890473	-	1120	1	0	0	1	2	2	7	11	4	6720483E21Rik	ENSMUSG00000097934.1	1	ENSMUST00000181654.1	4	1116	707	489	337	0	6
ENSMUSG00000025931.15	chr1	20890606	20939650	+	5488	5676	6850	6774	6126	6657	7513	8001	6357	7897	Paqr8	ENSMUSG00000025931.15	4	ENSMUST00000189400.6,ENSMUST00000068880.13,ENSMUST00000167119.7,ENSMUST00000187651.1	3,3,4,3	5327,4701,1468,1460	43717,16514,16407,12037	5068,4473,1167,1174	41374,14171,9694,9694	1064,1064,1064,1064	3,3,4,3
ENSMUSG00000077314.1	chr1	20915410	20915540	-	131	0	0	0	0	0	0	0	0	0	Gm24171	ENSMUSG00000077314.1	1	ENSMUST00000104126.1	1	130	0	130	0	0	3
ENSMUSG00000100929.1	chr1	20945711	20946914	+	858	14	4	0	2	0	0	1	0	0	Gm28064	ENSMUSG00000100929.1	1	ENSMUST00000185639.1	2	856	347	690	347	0	-1
ENSMUSG00000041809.5	chr1	20951626	20990841	+	2208	345	488	377	364	354	436	365	495	587	Efhc1	ENSMUSG00000041809.5	2	ENSMUST00000160782.1,ENSMUST00000038447.5	2,11	355,2135	3546,37018	185,287	3546,9811	0,1936	-1,1
ENSMUSG00000041779.5	chr1	20996299	21079229	-	6661	223	262	283	242	247	284	224	257	285	Tram2	ENSMUSG00000041779.5	2	ENSMUST00000037998.5,ENSMUST00000187210.1	11,8	6481,676	76449,38667	5336,168	41534,23886	0,0	11,10
ENSMUSG00000099971.1	chr1	21080114	21081748	+	546	38	39	5	35	20	17	14	15	38	Gm28287	ENSMUSG00000099971.1	1	ENSMUST00000186612.1	3	543	1091	257	792	0	-1
ENSMUSG00000100819.1	chr1	21178988	21187427	+	571	11	21	13	10	22	14	16	10	3	Gm2693	ENSMUSG00000100819.1	1	ENSMUST00000189119.1	5	566	7873	140	3310	0	-1
ENSMUSG00000025933.15	chr1	21218575	21230167	+	1351	539	553	511	458	555	574	413	447	559	Tmem14a	ENSMUSG00000025933.15	2	ENSMUST00000027065.11,ENSMUST00000027064.7	5,5	1163,1256	10429,10246	576,756	6669,6669	296,434	2,2
ENSMUSG00000102633.1	chr1	21234722	21236821	+	2100	0	3	2	6	1	5	4	4	0	Gm38224	ENSMUSG00000102633.1	1	ENSMUST00000191648.1	1	2099	0	2099	0	0	-1
ENSMUSG00000025934.15	chr1	21240589	21265661	+	4344	5	1	10	12	15	0	0	15	1	Gsta3	ENSMUSG00000025934.15	4	ENSMUST00000027067.14,ENSMUST00000121676.7,ENSMUST00000124990.2,ENSMUST00000190711.1	7,8,8,1	1450,886,734,2791	23622,23528,23483,0	818,178,141,2791	9092,7473,9092,0	660,660,0,0	2,3,5,-1
ENSMUSG00000099343.1	chr1	21250359	21271593	-	633	0	3	0	0	0	1	0	0	4	Gm28836	ENSMUSG00000099343.1	1	ENSMUST00000185842.1	2	631	20603	453	20603	0	4
ENSMUSG00000096375.2	chr1	21272403	21272906	+	366	14	2	9	6	15	17	8	8	13	Gm7094	ENSMUSG00000096375.2	1	ENSMUST00000178379.2	2	364	139	278	139	0	-1
ENSMUSG00000025936.15	chr1	21285246	21298312	-	1365	0	0	0	0	0	0	0	0	0	Gm4956	ENSMUSG00000025936.15	3	ENSMUST00000082032.12,ENSMUST00000178869.7,ENSMUST00000179730.1	6,6,5	1142,666,604	11924,11853,7658	487,141,206	3064,3064,3064	0,0,0	8,8,7
ENSMUSG00000093963.1	chr1	21312517	21316320	-	439	0	0	0	0	0	0	0	0	0	Gm21909	ENSMUSG00000093963.1	1	ENSMUST00000178260.1	4	435	3368	141	1666	0	6
ENSMUSG00000067750.3	chr1	21349641	21352200	+	1987	0	4	0	0	0	0	0	0	0	Khdc1a	ENSMUSG00000067750.3	1	ENSMUST00000088407.3	3	1984	575	1324	436	498	1
ENSMUSG00000086194.1	chr1	21354005	21355116	+	371	0	0	0	0	0	0	0	0	0	Gm16329	ENSMUSG00000086194.1	1	ENSMUST00000148174.1	3	368	743	181	444	0	-1
ENSMUSG00000094436.1	chr1	21364803	21365030	+	228	0	0	0	0	0	0	0	0	0	Gm16327	ENSMUSG00000094436.1	1	ENSMUST00000137146.1	1	227	0	227	0	0	-1
ENSMUSG00000041722.7	chr1	21368331	21370845	+	1946	0	0	0	0	0	0	0	0	0	Khdc1c	ENSMUSG00000041722.7	1	ENSMUST00000070223.5	3	1943	571	1335	436	498	1
ENSMUSG00000085507.1	chr1	21372670	21373764	+	350	0	0	0	1	0	0	0	0	0	Gm2709	ENSMUSG00000085507.1	1	ENSMUST00000142979.1	3	347	747	180	451	0	-1
ENSMUSG00000094926.1	chr1	21379555	21379782	+	228	0	0	0	0	0	0	0	0	0	Gm16533	ENSMUSG00000094926.1	1	ENSMUST00000140035.1	1	227	0	227	0	0	-1
ENSMUSG00000085079.3	chr1	21383556	21386373	+	2236	0	0	0	0	0	0	0	0	0	Khdc1b	ENSMUSG00000085079.3	1	ENSMUST00000147615.1	3	2233	584	1571	445	378	1
ENSMUSG00000085679.2	chr1	21390906	21391101	+	196	0	0	0	0	0	0	0	0	0	Gm16328	ENSMUSG00000085679.2	1	ENSMUST00000126985.2	1	195	0	195	0	0	-1
ENSMUSG00000028033.16	chr1	21398403	21961942	-	7689	266	308	253	261	291	277	68	66	101	Kcnq5	ENSMUSG00000028033.16	7	ENSMUST00000029667.12,ENSMUST00000115300.7,ENSMUST00000173058.7,ENSMUST00000174183.7,ENSMUST00000173404.1,ENSMUST00000115299.7,ENSMUST00000134505.1	14,15,12,12,13,9,5	6548,6960,2460,2636,2762,1463,657	556630,556574,556958,556782,556656,493957,277601	4722,4717,962,962,962,484,379	367567,367567,367567,367567,367567,367567,242269	0,0,0,0,0,0,0	14,15,12,3,13,11,7
ENSMUSG00000104138.1	chr1	21454691	21457017	-	2327	0	0	0	0	0	1	0	0	0	Gm36949	ENSMUSG00000104138.1	1	ENSMUST00000192487.1	1	2326	0	2326	0	0	3
ENSMUSG00000082935.3	chr1	21511933	21513056	-	1124	834	889	82	771	735	866	857	161	1008	Gm7658	ENSMUSG00000082935.3	1	ENSMUST00000119064.1	1	1123	0	1123	0	0	3
ENSMUSG00000103748.1	chr1	21838948	21840514	-	1567	3	9	4	8	8	0	0	3	2	Gm38243	ENSMUSG00000103748.1	1	ENSMUST00000194737.1	1	1566	0	1566	0	0	3
ENSMUSG00000097109.1	chr1	21959842	21962530	+	2095	2	0	0	4	2	0	0	0	0	Gm26580	ENSMUSG00000097109.1	1	ENSMUST00000181002.1	3	2092	596	1218	526	0	-1
ENSMUSG00000099692.1	chr1	22030064	22030615	-	552	0	0	0	0	0	0	0	0	0	Gm5696	ENSMUSG00000099692.1	1	ENSMUST00000189850.1	1	551	0	551	0	0	3
ENSMUSG00000100418.1	chr1	22237849	22238295	+	447	0	0	0	0	0	0	0	0	0	Gm28239	ENSMUSG00000100418.1	1	ENSMUST00000190225.1	1	446	0	446	0	0	-1
ENSMUSG00000041670.15	chr1	22286251	22805724	-	7080	920	962	835	984	811	902	449	386	637	Rims1	ENSMUSG00000041670.15	8	ENSMUST00000081544.12,ENSMUST00000115273.8,ENSMUST00000097811.9,ENSMUST00000097810.9,ENSMUST00000097809.9,ENSMUST00000164877.7,ENSMUST00000185942.1,ENSMUST00000097808.6	32,34,37,36,35,6,17,14	5922,6073,6409,6326,6144,2288,2172,2397	513551,513400,513064,513147,513329,26602,142249,335136	2389,2389,2389,2389,2389,1725,235,841	96450,96450,96450,96450,96450,18736,49297,96450	0,0,0,0,0,0,2,0	32,34,37,36,35,6,17,16
ENSMUSG00000097642.1	chr1	22740764	22741565	+	802	0	0	0	0	0	0	0	0	0	Gm26866	ENSMUSG00000097642.1	1	ENSMUST00000180414.1	1	801	0	801	0	0	-1
ENSMUSG00000101468.1	chr1	22984863	22987125	-	921	3	0	1	0	0	1	0	0	0	Gm7761	ENSMUSG00000101468.1	1	ENSMUST00000190510.1	3	918	1344	354	1081	0	5
ENSMUSG00000101227.1	chr1	23048295	23235673	-	2078	10	1	9	12	11	10	8	27	6	Gm29506	ENSMUSG00000101227.1	1	ENSMUST00000191045.1	4	2074	185304	1878	122998	0	6
ENSMUSG00000073730.2	chr1	23100473	23102253	-	1781	30	25	20	14	21	18	16	5	7	4933415F23Rik	ENSMUSG00000073730.2	1	ENSMUST00000073179.5	1	1780	0	1780	0	-457	1
ENSMUSG00000089553.1	chr1	23245211	23245331	+	121	0	0	0	0	0	0	0	0	0	Gm24176	ENSMUSG00000089553.1	1	ENSMUST00000158928.1	1	120	0	120	0	0	-1
ENSMUSG00000102766.1	chr1	23255685	23256407	-	723	1	11	0	1	0	3	0	0	15	Gm6420	ENSMUSG00000102766.1	2	ENSMUST00000193885.1,ENSMUST00000195365.1	1,1	722,419	0,0	722,419	0,0	0,0	3,3
ENSMUSG00000065405.3	chr1	23272269	23272339	+	71	49	36	26	43	44	39	21	38	28	Mir30a	ENSMUSG00000065405.3	1	ENSMUST00000083471.3	1	70	0	70	0	0	-1
ENSMUSG00000097970.1	chr1	23291537	23291935	+	399	82	51	53	83	79	73	22	66	51	Gm27028	ENSMUSG00000097970.1	1	ENSMUST00000182303.1	1	398	0	398	0	0	-1
ENSMUSG00000065567.1	chr1	23291701	23291784	+	84	20	14	14	30	19	23	7	10	7	Mir30c-2	ENSMUSG00000065567.1	1	ENSMUST00000083633.1	1	83	0	83	0	0	-1
ENSMUSG00000100775.1	chr1	23293729	23294075	+	347	5	16	4	11	8	20	4	14	6	Gm29107	ENSMUSG00000100775.1	1	ENSMUST00000190910.1	1	346	0	346	0	0	-1
ENSMUSG00000101226.1	chr1	23345956	23346599	-	644	0	0	0	0	0	0	0	0	0	Gm20954	ENSMUSG00000101226.1	1	ENSMUST00000189078.1	1	643	0	643	0	0	3
ENSMUSG00000026158.11	chr1	23366424	23397772	-	8109	2125	2850	2495	2596	2420	2632	2198	2345	2751	Ogfrl1	ENSMUSG00000026158.11	4	ENSMUST00000027343.5,ENSMUST00000186064.6,ENSMUST00000188677.1,ENSMUST00000189537.1	7,6,8,2	4837,2920,800,1520	11914,8157,26473,4503	4024,1829,180,1262	5282,5282,13813,4503	0,0,0,0	7,8,10,4
ENSMUSG00000097920.1	chr1	23479539	23480527	+	989	2	1	0	0	3	3	0	1	1	Gm7784	ENSMUSG00000097920.1	1	ENSMUST00000180769.1	1	988	0	988	0	0	-1
ENSMUSG00000099503.1	chr1	23574587	23596664	+	778	0	2	0	7	8	16	0	0	0	Gm28822	ENSMUSG00000099503.1	1	ENSMUST00000191140.1	4	774	21303	267	19581	0	-1
ENSMUSG00000026156.8	chr1	23761753	23849158	+	6203	745	954	1043	799	804	1026	131	169	239	B3gat2	ENSMUSG00000026156.8	3	ENSMUST00000144602.1,ENSMUST00000063663.5,ENSMUST00000140583.1	3,4,2	1485,5651,1735	52502,81581,51993	519,4057,1217	51993,51993,51993	314,971,907	3,1,1
ENSMUSG00000026155.13	chr1	23844846	23922317	-	3575	4483	5886	5170	5308	5550	5738	3956	4883	5001	Smap1	ENSMUSG00000026155.13	7	ENSMUST00000149737.7,ENSMUST00000027339.13,ENSMUST00000136506.1,ENSMUST00000129254.7,ENSMUST00000148710.7,ENSMUST00000141330.7,ENSMUST00000133398.1	11,10,2,10,6,10,7	1853,2279,443,1355,803,913,1264	63037,74413,1156,62038,20891,60257,41935	511,938,385,307,291,165,673	17670,30045,1156,17670,7104,17670,14066	0,0,0,0,0,0,0	13,10,4,10,8,12,9
ENSMUSG00000026154.4	chr1	23995939	24005656	-	874	3284	3475	2783	3052	3624	3610	2675	2840	3174	Sdhaf4	ENSMUSG00000026154.4	2	ENSMUST00000027338.3,ENSMUST00000155767.2	3,2	680,424	9037,2240	421,340	6797,2240	0,0	3,4
ENSMUSG00000102495.1	chr1	24005505	24005894	+	390	0	0	0	0	0	0	0	0	7	Gm26524	ENSMUSG00000102495.1	2	ENSMUST00000192339.1,ENSMUST00000195143.1	1,1	389,387	0,0	389,387	0,0	0,0	-1,-1
ENSMUSG00000026153.15	chr1	24011093	24100341	-	7773	12709	14887	13322	13009	13886	15883	9826	10710	11417	Fam135a	ENSMUSG00000026153.15	9	ENSMUST00000187619.6,ENSMUST00000188712.6,ENSMUST00000187752.6,ENSMUST00000187369.6,ENSMUST00000186331.1,ENSMUST00000027337.14,ENSMUST00000185807.1,ENSMUST00000186999.6,ENSMUST00000185525.1	6,21,21,22,8,21,4,16,9	2007,5101,5173,4954,2556,5515,479,2915,2645	13659,70332,83776,83637,14926,83137,3696,68579,45932	1404,1740,1740,1740,893,2328,250,1218,1572	6962,17433,27955,17433,5783,17433,1735,17433,17433	1201,0,0,0,1657,0,0,0,0	6,7,21,22,2,21,6,18,11
ENSMUSG00000102398.1	chr1	24100625	24103424	+	2800	44	69	22	26	29	39	45	16	46	Gm37580	ENSMUSG00000102398.1	1	ENSMUST00000192408.1	1	2799	0	2799	0	0	-1
ENSMUSG00000097670.1	chr1	24125275	24126141	+	867	0	0	0	0	0	0	0	0	0	Gm26607	ENSMUSG00000097670.1	1	ENSMUST00000180661.1	1	866	0	866	0	0	-1
ENSMUSG00000026147.16	chr1	24177610	24252684	+	5068	219	287	215	260	159	220	165	174	316	Col9a1	ENSMUSG00000026147.16	4	ENSMUST00000054588.14,ENSMUST00000088349.2,ENSMUST00000124600.1,ENSMUST00000147902.1	38,32,13,2	3796,3027,885,804	71278,54470,22883,634	1007,1007,318,732	9249,7242,4508,634	2728,2011,0,0	1,1,-1,-1
ENSMUSG00000026141.13	chr1	24261890	24587472	-	6887	99	155	108	115	86	128	130	55	236	Col19a1	ENSMUSG00000026141.13	3	ENSMUST00000144297.1,ENSMUST00000115244.8,ENSMUST00000051344.5	40,51,48	5401,4215,3288	185454,319263,304353	2927,823,275	35560,46655,46655	0,0,0	42,51,48
ENSMUSG00000077463.1	chr1	24548841	24548977	-	137	0	0	0	0	1	0	0	0	0	Gm26418	ENSMUSG00000077463.1	1	ENSMUST00000104275.1	1	136	0	136	0	0	3
ENSMUSG00000099997.1	chr1	24594087	24595423	-	1337	16	31	13	17	15	24	6	8	15	Tubb4b-ps2	ENSMUSG00000099997.1	1	ENSMUST00000187481.1	1	1336	0	1336	0	0	3
ENSMUSG00000100131.1	chr1	24611535	24612410	-	876	0	0	1	0	0	0	2	0	0	Gm28439	ENSMUSG00000100131.1	1	ENSMUST00000187714.1	1	875	0	875	0	0	3
ENSMUSG00000067736.2	chr1	24612407	24612700	-	294	0	3	0	0	0	1	1	0	1	Gm10222	ENSMUSG00000067736.2	1	ENSMUST00000088336.2	1	293	0	293	0	0	3
ENSMUSG00000101939.1	chr1	24612775	24613119	-	345	27	31	21	10	24	27	29	32	25	Gm28438	ENSMUSG00000101939.1	1	ENSMUST00000188299.1	1	344	0	344	0	0	3
ENSMUSG00000101111.1	chr1	24613189	24613971	-	783	162	170	140	73	145	145	125	104	147	Gm28437	ENSMUSG00000101111.1	1	ENSMUST00000190277.1	1	782	0	782	0	0	3
ENSMUSG00000100862.1	chr1	24613974	24614651	-	678	6	0	3	7	5	6	4	9	4	Gm10925	ENSMUSG00000100862.1	1	ENSMUST00000189941.1	1	677	0	677	0	0	3
ENSMUSG00000102070.1	chr1	24614885	24615565	-	681	18	23	21	18	16	18	12	24	31	Gm28661	ENSMUSG00000102070.1	1	ENSMUST00000188231.1	1	680	0	680	0	0	3
ENSMUSG00000101249.1	chr1	24615706	24616197	-	492	25	10	7	20	13	19	14	14	18	Gm29216	ENSMUSG00000101249.1	1	ENSMUST00000187117.1	1	491	0	491	0	0	3
ENSMUSG00000073725.8	chr1	24678630	24766301	+	5960	4353	4847	4465	4081	4641	4856	5295	5440	6368	Lmbrd1	ENSMUSG00000073725.8	6	ENSMUST00000191471.6,ENSMUST00000186096.6,ENSMUST00000186190.1,ENSMUST00000095062.9,ENSMUST00000187468.1,ENSMUST00000190195.1	16,6,4,16,4,4	4437,682,444,5212,738,525	82381,27709,52711,82163,15568,16995	2825,176,176,3678,475,201	13564,11820,43054,13564,11984,13314	1598,480,0,1389,0,427	1,1,1,2,-1,-1
ENSMUSG00000100808.1	chr1	24910461	24911659	-	661	0	0	0	0	0	0	0	0	0	Gm28594	ENSMUSG00000100808.1	1	ENSMUST00000187022.1	2	659	539	439	539	0	4
ENSMUSG00000100483.1	chr1	24963209	24965158	-	1216	0	0	0	0	0	0	0	0	0	Gm28237	ENSMUSG00000100483.1	2	ENSMUST00000186563.1,ENSMUST00000189477.1	2,2	639,746	1128,416	467,392	1128,416	0,0	4,4
ENSMUSG00000100450.1	chr1	25011941	25012756	+	816	0	0	0	0	0	0	0	0	0	Gm9443	ENSMUSG00000100450.1	1	ENSMUST00000188406.1	1	815	0	815	0	0	-1
ENSMUSG00000099392.1	chr1	25026581	25027232	-	448	0	0	0	0	0	0	0	0	0	Gm29414	ENSMUSG00000099392.1	1	ENSMUST00000185379.1	2	446	205	248	205	0	4
ENSMUSG00000033569.17	chr1	25067476	25829707	-	18559	5250	6248	6372	5975	6807	6796	2581	2692	4213	Adgrb3	ENSMUSG00000033569.17	11	ENSMUST00000126626.7,ENSMUST00000146592.7,ENSMUST00000135518.7,ENSMUST00000151309.7,ENSMUST00000041838.6,ENSMUST00000153568.7,ENSMUST00000126096.7,ENSMUST00000154102.1,ENSMUST00000190202.1,ENSMUST00000134022.1,ENSMUST00000189254.1	16,29,32,31,30,10,12,2,1,4,9	2937,4438,5400,5417,5029,2636,4557,341,2253,4228,5521	158413,754151,756561,756740,754053,158773,133035,73130,0,6564,336915	880,806,806,806,756,679,2954,192,2253,3827,4208	90359,266139,266139,266139,266139,109897,90359,73130,0,4858,266139	0,620,0,0,0,0,0,0,0,0,0	16,29,32,31,30,12,14,4,3,6,11
ENSMUSG00000080849.1	chr1	25223730	25224173	+	444	3	0	0	0	0	0	0	0	0	Gm15702	ENSMUSG00000080849.1	1	ENSMUST00000119680.1	1	443	0	443	0	0	-1
ENSMUSG00000104257.1	chr1	25276404	25277954	-	1551	7	5	11	15	10	15	2	5	12	Gm20172	ENSMUSG00000104257.1	1	ENSMUST00000193138.1	1	1550	0	1550	0	0	3
ENSMUSG00000096866.1	chr1	25279445	25279551	-	107	1	0	0	1	0	1	8	1	0	Gm22260	ENSMUSG00000096866.1	1	ENSMUST00000178643.1	1	106	0	106	0	0	3
ENSMUSG00000102296.1	chr1	25284218	25285248	-	1031	8	0	1	12	8	13	0	1	1	Gm37543	ENSMUSG00000102296.1	1	ENSMUST00000192443.1	1	1030	0	1030	0	0	3
ENSMUSG00000103209.1	chr1	25296512	25299886	-	3375	73	64	62	89	78	67	21	14	20	Gm37331	ENSMUSG00000103209.1	1	ENSMUST00000192367.1	1	3374	0	3374	0	0	3
ENSMUSG00000104027.1	chr1	25314276	25317708	-	3433	21	30	19	24	41	36	5	9	8	Gm37211	ENSMUSG00000104027.1	1	ENSMUST00000193392.1	1	3432	0	3432	0	0	3
ENSMUSG00000102407.1	chr1	25325866	25328398	-	2533	74	43	49	77	41	49	10	15	18	Gm37862	ENSMUSG00000102407.1	1	ENSMUST00000193079.1	1	2532	0	2532	0	0	3
ENSMUSG00000103214.1	chr1	25345978	25349082	-	3105	201	168	124	143	159	204	31	31	13	Gm38286	ENSMUSG00000103214.1	1	ENSMUST00000195128.1	1	3104	0	3104	0	0	3
ENSMUSG00000104100.1	chr1	25362564	25365820	-	3257	15	18	8	15	21	59	0	5	1	Gm37880	ENSMUSG00000104100.1	1	ENSMUST00000192216.1	1	3256	0	3256	0	0	3
ENSMUSG00000084740.1	chr1	25451071	25451174	+	104	0	0	0	0	0	0	0	0	0	Gm25294	ENSMUSG00000084740.1	1	ENSMUST00000122791.1	1	103	0	103	0	0	-1
ENSMUSG00000103889.1	chr1	25608250	25611184	-	2935	42	54	34	38	55	85	21	25	18	Gm37011	ENSMUSG00000103889.1	1	ENSMUST00000195543.1	1	2934	0	2934	0	0	3
ENSMUSG00000101301.1	chr1	25614946	25615515	-	570	21	32	16	44	33	51	11	11	9	Gm29214	ENSMUSG00000101301.1	1	ENSMUST00000190216.1	1	569	0	569	0	0	3
ENSMUSG00000104221.1	chr1	25620238	25623180	-	2943	44	57	28	47	66	80	15	24	15	Gm37051	ENSMUSG00000104221.1	1	ENSMUST00000194535.1	1	2942	0	2942	0	0	3
ENSMUSG00000102250.1	chr1	25672245	25676239	-	3995	87	130	88	129	143	153	17	40	36	Gm38260	ENSMUSG00000102250.1	1	ENSMUST00000193573.1	1	3994	0	3994	0	0	3
ENSMUSG00000102317.1	chr1	25686062	25691501	-	5440	201	225	125	191	236	236	41	83	57	Gm37628	ENSMUSG00000102317.1	1	ENSMUST00000194644.1	1	5439	0	5439	0	0	3
ENSMUSG00000103563.1	chr1	25722038	25724778	-	2741	31	34	22	46	44	52	5	11	8	8030445P17Rik	ENSMUSG00000103563.1	1	ENSMUST00000192614.1	1	2740	0	2740	0	0	3
ENSMUSG00000102465.1	chr1	25735389	25738969	-	3581	86	60	48	70	97	107	33	34	14	Gm38198	ENSMUSG00000102465.1	1	ENSMUST00000191772.1	1	3580	0	3580	0	0	3
ENSMUSG00000102659.1	chr1	25755343	25759033	-	3691	47	46	47	51	60	37	19	43	12	Gm37077	ENSMUSG00000102659.1	1	ENSMUST00000195723.1	1	3690	0	3690	0	0	3
ENSMUSG00000103924.1	chr1	25775757	25780306	-	4550	381	358	255	527	530	536	276	355	359	Gm37895	ENSMUSG00000103924.1	1	ENSMUST00000192448.1	1	4549	0	4549	0	0	3
ENSMUSG00000104132.1	chr1	25797281	25800905	-	3625	310	292	202	330	432	336	248	263	257	Gm36952	ENSMUSG00000104132.1	1	ENSMUST00000194923.1	1	3624	0	3624	0	0	3
ENSMUSG00000102747.1	chr1	25804097	25807406	-	3310	316	312	193	395	391	341	258	303	279	Gm37602	ENSMUSG00000102747.1	1	ENSMUST00000195187.1	1	3309	0	3309	0	0	3
ENSMUSG00000102386.1	chr1	25808956	25809972	-	1017	115	156	61	157	206	115	125	151	98	2900022M07Rik	ENSMUSG00000102386.1	1	ENSMUST00000193912.1	1	1016	0	1016	0	0	3
ENSMUSG00000103004.1	chr1	25824390	25824719	-	330	209	254	176	297	304	286	166	203	206	2900002M20Rik	ENSMUSG00000103004.1	1	ENSMUST00000195754.1	1	329	0	329	0	0	3
ENSMUSG00000104516.1	chr1	25830657	25831878	+	1222	23	22	36	38	14	39	25	38	23	Gm9884	ENSMUSG00000104516.1	1	ENSMUST00000194343.1	1	1221	0	1221	0	0	-1
ENSMUSG00000101618.1	chr1	25996604	25997159	-	556	0	0	0	0	0	0	0	0	0	Gm18443	ENSMUSG00000101618.1	1	ENSMUST00000185358.1	1	555	0	555	0	0	3
ENSMUSG00000099458.1	chr1	26466236	26466886	+	651	0	0	0	0	0	0	0	0	0	Gm19123	ENSMUSG00000099458.1	1	ENSMUST00000190716.1	1	650	0	650	0	0	-1
ENSMUSG00000088111.1	chr1	26566833	26566938	+	106	0	0	0	0	0	0	0	0	0	Gm24064	ENSMUSG00000088111.1	1	ENSMUST00000157486.1	1	105	0	105	0	0	-1
ENSMUSG00000073722.3	chr1	26681814	26687460	-	4318	0	0	0	0	0	0	0	0	0	4931408C20Rik	ENSMUSG00000073722.3	1	ENSMUST00000097801.3	2	4316	1330	4097	1330	0	2
ENSMUSG00000095256.1	chr1	26959103	26959221	-	119	0	0	0	0	0	0	0	0	0	n-R5s209	ENSMUSG00000095256.1	1	ENSMUST00000179494.1	1	118	0	118	0	0	3
ENSMUSG00000100310.1	chr1	27336352	27336768	-	417	0	0	0	0	0	0	0	0	0	Gm19641	ENSMUSG00000100310.1	1	ENSMUST00000188432.1	1	416	0	416	0	0	3
ENSMUSG00000101514.1	chr1	27884046	27902396	+	2002	0	0	0	0	0	0	0	0	0	Gm5524	ENSMUSG00000101514.1	1	ENSMUST00000185409.1	2	2000	16350	1968	16350	0	-1
ENSMUSG00000101033.1	chr1	27900419	27901072	-	654	0	0	0	0	0	0	0	0	0	Gm18776	ENSMUSG00000101033.1	1	ENSMUST00000188833.1	1	653	0	653	0	0	3
ENSMUSG00000101372.1	chr1	27989910	27991782	+	1873	5	5	3	6	2	8	0	3	4	Gm19028	ENSMUSG00000101372.1	1	ENSMUST00000189614.1	1	1872	0	1872	0	0	-1
ENSMUSG00000103241.1	chr1	28569918	28571431	+	1514	0	0	0	0	0	0	0	0	0	Gm38089	ENSMUSG00000103241.1	1	ENSMUST00000193585.1	1	1513	0	1513	0	0	-1
ENSMUSG00000086240.4	chr1	28580499	28580772	-	274	442	549	424	468	435	444	355	392	428	Gm7846	ENSMUSG00000086240.4	1	ENSMUST00000145844.2	1	273	0	273	0	0	3
ENSMUSG00000048411.4	chr1	28776117	28780252	-	2887	0	0	0	0	0	0	0	0	0	Gm597	ENSMUSG00000048411.4	1	ENSMUST00000059937.4	2	2885	1250	2667	1250	0	2
ENSMUSG00000081557.2	chr1	28800240	28802721	-	2482	12	22	9	14	8	8	9	16	9	Gm5697	ENSMUSG00000081557.2	1	ENSMUST00000122295.2	1	2481	0	2481	0	0	3
ENSMUSG00000058590.2	chr1	28938036	28938339	+	304	0	0	0	0	0	0	0	0	2	Gm6462	ENSMUSG00000058590.2	1	ENSMUST00000081488.2	1	303	0	303	0	0	-1
ENSMUSG00000101235.1	chr1	29219700	29220249	+	550	0	0	0	0	0	0	0	0	0	Gm18033	ENSMUSG00000101235.1	1	ENSMUST00000186678.1	1	549	0	549	0	0	-1
ENSMUSG00000064433.1	chr1	29280964	29281075	-	112	0	0	0	0	0	0	0	0	0	Gm25586	ENSMUSG00000064433.1	1	ENSMUST00000082499.1	1	111	0	111	0	0	3
ENSMUSG00000080625.1	chr1	29301480	29301579	+	100	0	0	0	0	0	0	0	0	0	Gm22679	ENSMUSG00000080625.1	1	ENSMUST00000116975.1	1	99	0	99	0	0	-1
ENSMUSG00000080391.1	chr1	29361275	29361370	-	96	0	0	0	0	0	0	0	0	0	Gm23785	ENSMUSG00000080391.1	1	ENSMUST00000116741.1	1	95	0	95	0	0	3
ENSMUSG00000099257.1	chr1	29421488	29421612	+	125	0	0	0	0	0	0	0	0	0	Mir6342	ENSMUSG00000099257.1	1	ENSMUST00000183870.1	1	124	0	124	0	0	-1
ENSMUSG00000099492.1	chr1	29484604	29485915	-	1312	37	25	21	23	25	14	17	20	18	Gm5525	ENSMUSG00000099492.1	1	ENSMUST00000190438.1	1	1311	0	1311	0	0	3
ENSMUSG00000101726.1	chr1	29930094	29930715	+	622	2	1	3	2	8	6	1	1	4	Gm7858	ENSMUSG00000101726.1	1	ENSMUST00000190177.1	1	621	0	621	0	0	-1
ENSMUSG00000096829.1	chr1	29985934	29986043	+	110	0	0	0	0	0	0	0	0	0	Gm23771	ENSMUSG00000096829.1	1	ENSMUST00000178702.1	1	109	0	109	0	0	-1
ENSMUSG00000098883.1	chr1	30333291	30333397	-	107	0	0	0	0	0	0	0	0	0	Gm27430	ENSMUSG00000098883.1	1	ENSMUST00000184585.1	1	106	0	106	0	0	3
ENSMUSG00000053185.2	chr1	30718560	30719962	-	1161	0	0	0	0	0	0	0	0	0	Gm9898	ENSMUSG00000053185.2	1	ENSMUST00000065469.2	2	1159	243	644	243	0	4
ENSMUSG00000100261.1	chr1	30769687	30771815	+	1210	4	1	0	2	3	1	1	3	3	Gm6473	ENSMUSG00000100261.1	1	ENSMUST00000188572.1	4	1206	922	715	430	0	-1
ENSMUSG00000101180.1	chr1	30794548	30794875	-	328	0	0	0	0	0	0	0	0	1	Gm2914	ENSMUSG00000101180.1	1	ENSMUST00000186120.1	1	327	0	327	0	0	3
ENSMUSG00000048874.15	chr1	30802339	30873921	-	14190	16123	21751	20459	18982	17981	22960	17129	20826	23189	Phf3	ENSMUSG00000048874.15	14	ENSMUST00000186733.6,ENSMUST00000088310.9,ENSMUST00000191329.1,ENSMUST00000190190.1,ENSMUST00000187316.1,ENSMUST00000186105.6,ENSMUST00000191245.6,ENSMUST00000191064.6,ENSMUST00000188847.1,ENSMUST00000187600.1,ENSMUST00000185521.1,ENSMUST00000188780.1,ENSMUST00000187968.1,ENSMUST00000185604.1	16,15,3,2,2,7,6,7,1,2,1,3,2,1	7551,7546,2936,541,581,1545,2404,1302,2785,186,1312,938,414,823	63691,53368,4230,2359,1050,58579,56202,52276,0,38468,0,41751,9768,0	3603,3600,2818,382,518,520,1269,309,2785,103,1312,354,229,823	25721,25721,2359,2359,1050,49059,49059,25721,0,38468,0,31428,9768,0	0,0,2605,0,0,0,0,0,0,0,0,0,0,0	16,15,3,4,4,9,8,4,3,4,3,5,4,3
ENSMUSG00000103783.1	chr1	30833548	30836431	-	2884	171	188	131	190	175	154	126	130	111	Gm37522	ENSMUSG00000103783.1	1	ENSMUST00000195437.1	1	2883	0	2883	0	0	3
ENSMUSG00000104315.1	chr1	30865504	30868538	-	3035	243	278	135	361	233	204	136	250	243	Gm37906	ENSMUSG00000104315.1	1	ENSMUST00000192050.1	1	3034	0	3034	0	0	3
ENSMUSG00000026064.15	chr1	30940302	30949770	-	5763	7053	7809	6248	6777	7570	7594	6152	6822	7642	Ptp4a1	ENSMUSG00000026064.15	6	ENSMUST00000027232.13,ENSMUST00000076587.4,ENSMUST00000153681.1,ENSMUST00000130934.1,ENSMUST00000124445.2,ENSMUST00000202889.1	6,6,4,2,2,2	4139,2845,3068,474,784,133	5329,5332,1411,609,2358,2910	3021,1743,1488,372,472,95	2910,2913,609,609,2358,2910	0,0,0,0,0,0	6,6,6,4,4,2
ENSMUSG00000086151.3	chr1	30977244	30977967	-	724	0	0	0	1	0	0	0	0	5	Gm5698	ENSMUSG00000086151.3	1	ENSMUST00000178317.2	1	723	0	723	0	0	3
ENSMUSG00000086726.2	chr1	30986226	30986952	-	727	0	0	0	0	0	0	0	1	1	Gm9458	ENSMUSG00000086726.2	1	ENSMUST00000135273.2	1	726	0	726	0	0	3
ENSMUSG00000087346.2	chr1	30998184	30998906	-	723	0	1	0	0	0	0	0	0	0	Gm5699	ENSMUSG00000087346.2	1	ENSMUST00000152491.2	1	722	0	722	0	0	3
ENSMUSG00000100371.1	chr1	31019188	31096454	-	881	0	0	0	0	0	0	0	0	0	Gm29669	ENSMUSG00000100371.1	1	ENSMUST00000188605.1	4	877	76389	497	48600	0	6
ENSMUSG00000100237.1	chr1	31041919	31043675	+	585	0	0	0	0	0	0	0	0	0	Gm28644	ENSMUSG00000100237.1	1	ENSMUST00000191364.1	3	582	1174	376	969	0	-1
ENSMUSG00000098529.1	chr1	31122725	31122862	-	138	0	0	0	0	0	0	0	0	0	Gm27362	ENSMUSG00000098529.1	1	ENSMUST00000184868.1	1	137	0	137	0	0	3
ENSMUSG00000086727.7	chr1	31135226	31222684	-	1516	0	0	0	0	0	0	0	0	0	4931428L18Rik	ENSMUSG00000086727.7	4	ENSMUST00000187892.6,ENSMUST00000127775.7,ENSMUST00000187659.6,ENSMUST00000135245.2	3,3,3,3	363,1006,420,886	87008,80487,80491,18867	221,604,221,457	69005,62484,62488,18003	0,0,0,0	5,3,3,3
ENSMUSG00000100910.1	chr1	31136026	31150105	+	2858	0	0	0	0	0	0	0	0	0	Gm29128	ENSMUSG00000100910.1	1	ENSMUST00000186448.1	3	2855	11224	2298	5637	0	-1
ENSMUSG00000099796.1	chr1	31164549	31164773	+	225	0	0	0	0	0	0	0	0	0	Gm7893	ENSMUSG00000099796.1	1	ENSMUST00000189666.1	1	224	0	224	0	0	-1
ENSMUSG00000050217.13	chr1	31176401	31204725	+	1937	0	0	0	0	0	0	0	0	0	Lgsn	ENSMUSG00000050217.13	2	ENSMUST00000062560.13,ENSMUST00000161773.2	5,3	1932,1583	26392,13672	1394,1394	12886,12807	1687,250	1,-1
ENSMUSG00000026063.4	chr1	31222838	31224288	+	1451	0	0	0	0	0	0	0	1	0	Pih1d3	ENSMUSG00000026063.4	1	ENSMUST00000027230.2	1	1450	0	1450	0	656	1
ENSMUSG00000077664.1	chr1	31259593	31259719	-	127	0	0	0	0	0	0	0	0	0	Gm26145	ENSMUSG00000077664.1	1	ENSMUST00000104476.1	1	126	0	126	0	0	3
ENSMUSG00000100205.1	chr1	31267326	31267884	+	559	1	0	0	0	0	0	0	0	0	Gm4850	ENSMUSG00000100205.1	1	ENSMUST00000185684.1	1	558	0	558	0	0	-1
ENSMUSG00000100592.1	chr1	31274892	31275455	+	564	0	0	0	0	0	0	0	0	0	Gm28645	ENSMUSG00000100592.1	1	ENSMUST00000185859.1	1	563	0	563	0	0	-1
ENSMUSG00000094215.2	chr1	31286945	31287640	+	696	1	0	0	2	0	2	1	0	0	Gm6489	ENSMUSG00000094215.2	1	ENSMUST00000178167.2	1	695	0	695	0	0	-1
ENSMUSG00000101093.1	chr1	31559540	31561400	+	1337	0	0	0	0	0	0	0	0	0	Gm10307	ENSMUSG00000101093.1	1	ENSMUST00000189839.1	2	1335	525	1290	525	0	-1
ENSMUSG00000070960.4	chr1	31615149	31616661	+	1513	0	8	1	2	4	2	1	3	4	Gm19680	ENSMUSG00000070960.4	1	ENSMUST00000095050.4	1	1512	0	1512	0	0	-1
ENSMUSG00000088620.1	chr1	31656632	31656738	-	107	0	0	0	0	0	0	0	0	0	Gm23032	ENSMUSG00000088620.1	1	ENSMUST00000157995.1	1	106	0	106	0	0	3
ENSMUSG00000082159.2	chr1	31736057	31736891	+	835	0	0	0	0	0	0	0	0	0	Gm7910	ENSMUSG00000082159.2	1	ENSMUST00000117896.2	1	834	0	834	0	0	-1
ENSMUSG00000026058.11	chr1	32172714	32658568	+	10291	4103	5229	4364	4334	5277	4962	1498	1497	1794	Khdrbs2	ENSMUSG00000026058.11	5	ENSMUST00000027226.11,ENSMUST00000189878.1,ENSMUST00000188257.6,ENSMUST00000185666.1,ENSMUST00000186984.1	9,2,3,3,3	2272,3257,5275,540,272	483582,70892,160331,137663,99647	1124,2978,4888,292,116	146406,70892,89439,70892,81289	1041,274,579,276,0	1,1,1,1,-1
ENSMUSG00000064688.1	chr1	32213133	32213239	-	107	0	0	0	0	0	0	0	0	0	Gm25814	ENSMUSG00000064688.1	1	ENSMUST00000082754.1	1	106	0	106	0	0	3
ENSMUSG00000103482.1	chr1	32473757	32475565	+	1809	29	28	38	33	30	49	9	14	18	Gm37999	ENSMUSG00000103482.1	1	ENSMUST00000195178.1	1	1808	0	1808	0	0	-1
ENSMUSG00000104498.1	chr1	32485315	32486942	+	1628	0	1	6	1	4	1	0	3	3	Gm37110	ENSMUSG00000104498.1	1	ENSMUST00000192993.1	1	1627	0	1627	0	0	-1
ENSMUSG00000104313.1	chr1	32496444	32497988	+	1545	40	56	22	80	84	57	15	10	27	Gm37911	ENSMUSG00000104313.1	1	ENSMUST00000193099.1	1	1544	0	1544	0	0	-1
ENSMUSG00000102865.1	chr1	32519563	32520999	-	1437	0	0	0	0	0	0	0	0	0	Gm9839	ENSMUSG00000102865.1	1	ENSMUST00000195252.1	1	1436	0	1436	0	0	3
ENSMUSG00000102321.1	chr1	32539028	32542440	+	3413	18	8	6	18	16	18	8	6	9	Gm37792	ENSMUSG00000102321.1	1	ENSMUST00000195761.1	1	3412	0	3412	0	0	-1
ENSMUSG00000091318.2	chr1	32543686	32547294	-	3609	0	0	2	0	0	0	0	0	0	Gm5415	ENSMUSG00000091318.2	1	ENSMUST00000171322.2	1	3608	0	3608	0	-1432	1
ENSMUSG00000089489.1	chr1	32568359	32568421	-	63	0	0	0	0	0	0	0	0	0	Gm24732	ENSMUSG00000089489.1	1	ENSMUST00000158864.1	1	62	0	62	0	0	3
ENSMUSG00000104433.1	chr1	32710179	32712648	+	2470	10	9	0	5	11	0	0	3	0	Gm37426	ENSMUSG00000104433.1	1	ENSMUST00000195241.1	1	2469	0	2469	0	0	-1
ENSMUSG00000089395.1	chr1	32726639	32726930	+	292	0	0	0	0	2	0	0	0	0	Gm23024	ENSMUSG00000089395.1	1	ENSMUST00000158770.1	1	291	0	291	0	0	-1
ENSMUSG00000102926.1	chr1	32967484	32972490	-	5007	0	0	0	0	0	0	0	0	0	Gm37151	ENSMUSG00000102926.1	1	ENSMUST00000194631.1	1	5006	0	5006	0	0	3
ENSMUSG00000100497.1	chr1	33028160	33030290	-	2131	0	0	0	0	0	0	0	0	0	Gm28624	ENSMUSG00000100497.1	1	ENSMUST00000186430.1	1	2130	0	2130	0	0	3
ENSMUSG00000102917.1	chr1	33065130	33066350	+	1221	0	0	0	0	1	0	0	0	0	Gm37724	ENSMUSG00000102917.1	1	ENSMUST00000195240.1	1	1220	0	1220	0	0	-1
ENSMUSG00000100481.1	chr1	33100907	33102695	+	1789	10	8	3	7	3	12	3	7	2	Gm7114	ENSMUSG00000100481.1	1	ENSMUST00000190159.1	1	1788	0	1788	0	0	-1
ENSMUSG00000100590.1	chr1	33108905	33109655	-	751	0	7	1	2	2	0	0	5	1	Gm4785	ENSMUSG00000100590.1	1	ENSMUST00000191025.1	1	750	0	750	0	0	3
ENSMUSG00000088750.1	chr1	33191993	33192102	+	110	0	0	0	0	0	0	0	0	0	Gm24901	ENSMUSG00000088750.1	1	ENSMUST00000158125.1	1	109	0	109	0	0	-1
ENSMUSG00000104230.1	chr1	33212774	33215475	-	650	0	0	0	0	0	0	0	0	0	Gm37591	ENSMUSG00000104230.1	1	ENSMUST00000193283.1	2	648	2053	444	2053	0	4
ENSMUSG00000101754.2	chr1	33235939	33237631	+	1693	0	2	0	0	0	0	0	0	0	Gm2987	ENSMUSG00000101754.2	1	ENSMUST00000187673.2	1	1692	0	1692	0	0	-1
ENSMUSG00000065223.1	chr1	33293676	33293775	+	100	0	0	0	0	0	0	0	0	0	Gm25792	ENSMUSG00000065223.1	1	ENSMUST00000083289.1	1	99	0	99	0	0	-1
ENSMUSG00000100318.2	chr1	33315670	33316582	-	913	0	0	0	0	0	0	0	0	0	Gm18799	ENSMUSG00000100318.2	1	ENSMUST00000189104.2	1	912	0	912	0	0	3
ENSMUSG00000101612.2	chr1	33371331	33373585	+	2255	0	0	0	0	0	0	1	0	0	Gm7933	ENSMUSG00000101612.2	1	ENSMUST00000191215.2	1	2254	0	2254	0	0	-1
ENSMUSG00000065260.1	chr1	33422733	33422838	+	106	0	0	0	0	0	0	0	0	0	Gm23453	ENSMUSG00000065260.1	1	ENSMUST00000083326.1	1	105	0	105	0	0	-1
ENSMUSG00000026134.11	chr1	33453810	33669795	-	5938	12758	15144	12255	13067	13471	13557	5921	6545	6234	Prim2	ENSMUSG00000026134.11	3	ENSMUST00000027312.10,ENSMUST00000189552.1,ENSMUST00000187353.1	14,6,1	1961,2126,2446	214024,141074,0	494,1598,2446	95032,88701,0	0,0,0	14,8,3
ENSMUSG00000101682.1	chr1	33482101	33482518	+	418	7	14	18	7	5	19	5	26	24	Gm29228	ENSMUSG00000101682.1	1	ENSMUST00000185489.1	1	417	0	417	0	0	-1
ENSMUSG00000102714.1	chr1	33613758	33616832	-	3075	38	57	41	45	50	66	18	32	29	Gm37618	ENSMUSG00000102714.1	1	ENSMUST00000192891.1	1	3074	0	3074	0	0	3
ENSMUSG00000102093.1	chr1	33657781	33658108	+	328	0	0	0	0	0	0	0	0	0	Gm17813	ENSMUSG00000102093.1	1	ENSMUST00000185377.1	1	327	0	327	0	0	-1
ENSMUSG00000103746.1	chr1	33669824	33670712	+	889	134	239	125	196	152	185	125	157	201	1700001G17Rik	ENSMUSG00000103746.1	2	ENSMUST00000191779.1,ENSMUST00000191965.1	1,1	888,869	0,0	888,869	0,0	0,0	-1,-1
ENSMUSG00000102198.1	chr1	33671915	33674228	-	2314	0	0	0	2	0	0	0	0	0	Gm38173	ENSMUSG00000102198.1	1	ENSMUST00000193126.1	1	2313	0	2313	0	0	3
ENSMUSG00000004768.14	chr1	33719887	33742564	+	8285	2686	3518	2759	3018	2997	2985	2610	2552	3128	Rab23	ENSMUSG00000004768.14	10	ENSMUST00000195006.5,ENSMUST00000140354.7,ENSMUST00000088287.9,ENSMUST00000138024.7,ENSMUST00000135330.7,ENSMUST00000151482.7,ENSMUST00000115174.3,ENSMUST00000150593.7,ENSMUST00000122822.1,ENSMUST00000132066.3	3,4,8,8,3,5,8,4,3,2	441,2553,4314,4390,2044,1082,4210,1962,434,1762	3509,4451,18355,18258,3522,14134,17944,4221,2279,873	286,1957,3311,3304,1690,652,3308,1458,225,1519	2074,2087,9683,9683,2087,9683,9683,1942,1406,873	0,0,708,194,0,0,708,0,0,0	-1,-1,3,3,-1,-1,3,-1,-1,-1
ENSMUSG00000042215.8	chr1	33745484	33757795	-	3059	1840	2353	1988	1943	2036	2236	1980	2014	2302	Bag2	ENSMUSG00000042215.8	4	ENSMUST00000044691.8,ENSMUST00000155484.1,ENSMUST00000187602.1,ENSMUST00000189741.1	3,2,2,1	1857,779,376,954	10454,1201,10563,0	1532,502,214,954	9253,1201,10563,0	0,0,0,0	3,4,2,3
ENSMUSG00000103072.1	chr1	33748007	33748347	+	341	0	0	0	0	0	0	0	0	0	Gm37905	ENSMUSG00000103072.1	1	ENSMUST00000195310.1	1	340	0	340	0	0	-1
ENSMUSG00000042197.13	chr1	33761545	33814595	-	15839	25740	27859	24896	26345	30188	29766	26284	29485	32081	Zfp451	ENSMUSG00000042197.13	9	ENSMUST00000139143.7,ENSMUST00000019861.12,ENSMUST00000115167.7,ENSMUST00000151055.7,ENSMUST00000194656.5,ENSMUST00000130376.2,ENSMUST00000140163.1,ENSMUST00000044455.7,ENSMUST00000125723.3	13,15,4,5,8,7,2,4,2	3565,3943,670,699,793,648,710,11872,540	49275,49039,27176,4182,34444,31385,13603,10562,528	1594,1594,320,153,153,150,632,11477,283	22148,18807,25290,2019,21375,18807,13603,8308,528	0,0,0,606,0,0,0,0,0	4,15,6,1,10,9,4,4,4
ENSMUSG00000081402.4	chr1	33836124	33838680	-	2557	48	52	29	39	38	43	30	41	40	Gm15455	ENSMUSG00000081402.4	1	ENSMUST00000117459.2	1	2556	0	2556	0	0	3
ENSMUSG00000042182.16	chr1	33852052	33907816	-	3421	1139	1519	1775	1929	1831	1568	837	731	1431	Bend6	ENSMUSG00000042182.16	6	ENSMUST00000115161.7,ENSMUST00000129464.7,ENSMUST00000062289.10,ENSMUST00000195350.5,ENSMUST00000126724.7,ENSMUST00000139700.2	6,3,7,4,4,3	2225,1747,2480,345,1576,379	53491,53992,53284,20440,19110,9353	1315,1315,1315,177,778,177	29129,30074,23918,13686,13517,5004	0,0,0,0,0,0	6,3,7,6,6,5
ENSMUSG00000104416.1	chr1	33889490	33891117	-	1628	4	2	3	5	12	17	0	2	12	Gm37067	ENSMUSG00000104416.1	1	ENSMUST00000195730.1	1	1627	0	1627	0	0	3
ENSMUSG00000026131.18	chr1	33908225	34308661	+	41155	14207	21132	21332	23229	18592	24942	18539	25946	29057	Dst	ENSMUSG00000026131.18	20	ENSMUST00000183034.4,ENSMUST00000187486.6,ENSMUST00000182697.7,ENSMUST00000182314.7,ENSMUST00000183331.7,ENSMUST00000097786.9,ENSMUST00000115104.9,ENSMUST00000097785.9,ENSMUST00000182410.2,ENSMUST00000183006.3,ENSMUST00000183302.5,ENSMUST00000185897.6,ENSMUST00000185269.6,ENSMUST00000182335.1,ENSMUST00000189952.1,ENSMUST00000194192.2,ENSMUST00000182018.7,ENSMUST00000185736.1,ENSMUST00000183100.7,…	103,33,7,6,18,93,98,98,4,5,24,26,84,1,1,23,32,2,7,6	23098,4506,2697,2637,2710,17119,23181,23153,2023,1216,8764,8935,16256,3477,4341,6016,5697,1392,779,770	376269,164409,128556,128373,155810,279720,273644,273683,27838,31737,14810,23998,131818,0,0,31671,44871,330,9229,11435	5291,462,2045,2046,462,1471,5291,5291,1721,824,2769,5291,1471,3477,4341,2307,1074,937,202,202	79844,79844,79844,79844,79844,74327,74327,74327,24505,16946,3001,9221,13373,0,0,3716,4284,330,4185,4185	23051,0,818,843,0,16047,22123,22084,0,0,7896,0,15444,0,0,0,4885,0,0,0	1,1,1,1,-1,1,1,1,-1,-1,1,1,1,-1,-1,1,-1,-1,-1,-1
ENSMUSG00000103596.1	chr1	33922455	33924838	+	2384	16	21	13	38	32	20	3	19	14	Gm37354	ENSMUSG00000103596.1	1	ENSMUST00000193333.1	1	2383	0	2383	0	0	-1
ENSMUSG00000099382.1	chr1	33963352	33963685	-	334	0	0	0	0	0	0	0	0	0	Gm28631	ENSMUSG00000099382.1	1	ENSMUST00000190740.1	1	333	0	333	0	0	3
ENSMUSG00000084506.1	chr1	33981410	33981502	-	93	0	0	0	0	0	0	0	0	0	Gm23792	ENSMUSG00000084506.1	1	ENSMUST00000122557.1	1	92	0	92	0	0	3
ENSMUSG00000103364.1	chr1	34032100	34033797	+	1698	57	70	51	134	130	89	87	94	81	Gm38157	ENSMUSG00000103364.1	1	ENSMUST00000194178.1	1	1697	0	1697	0	0	-1
ENSMUSG00000105982.1	chr1	34117359	34117431	+	73	10	11	10	6	2	16	6	6	6	Mir6896	ENSMUSG00000105982.1	1	ENSMUST00000198033.1	1	72	0	72	0	0	-1
ENSMUSG00000096992.3	chr1	34165856	34178446	-	4782	9	22	8	16	22	25	10	24	44	Gm26788	ENSMUSG00000096992.3	2	ENSMUST00000181692.2,ENSMUST00000187268.1	3,1	1747,3415	10668,0	1239,3415	8618,0	0,0	5,3
ENSMUSG00000103001.1	chr1	34269882	34271128	-	1247	0	0	0	0	0	0	0	0	0	A930005N03Rik	ENSMUSG00000103001.1	1	ENSMUST00000194920.1	1	1246	0	1246	0	0	3
ENSMUSG00000104397.1	chr1	34329433	34330307	-	430	0	0	0	0	0	0	0	0	0	Gm37958	ENSMUSG00000104397.1	1	ENSMUST00000193131.1	2	428	446	288	446	0	4
ENSMUSG00000102839.1	chr1	34350775	34351161	+	387	0	0	0	0	0	0	0	0	0	Gm37385	ENSMUSG00000102839.1	1	ENSMUST00000195223.1	1	386	0	386	0	0	-1
ENSMUSG00000101206.1	chr1	34367371	34369003	+	1162	0	0	0	0	0	0	0	0	0	Gm5266	ENSMUSG00000101206.1	1	ENSMUST00000187302.1	2	1160	472	680	472	0	-1
ENSMUSG00000101462.2	chr1	34415050	34417986	-	2937	84	88	88	71	72	101	38	40	67	Gm3052	ENSMUSG00000101462.2	2	ENSMUST00000186409.1,ENSMUST00000188254.2	1,1	828,2223	0,0	828,2223	0,0	0,0	3,3
ENSMUSG00000102336.1	chr1	34427002	34433264	-	6263	346	495	407	546	449	499	338	316	486	Gm37233	ENSMUSG00000102336.1	1	ENSMUST00000192173.1	1	6262	0	6262	0	0	3
ENSMUSG00000092852.1	chr1	34433121	34433199	-	79	24	54	30	38	56	25	25	17	33	Mir5103	ENSMUSG00000092852.1	1	ENSMUST00000175111.1	1	78	0	78	0	0	3
ENSMUSG00000042111.9	chr1	34436670	34439672	-	2543	4855	5742	5303	4674	4960	5200	5021	4924	6268	Ccdc115	ENSMUSG00000042111.9	2	ENSMUST00000042493.9,ENSMUST00000188583.1	5,2	1700,1901	1302,117	940,969	992,117	0,0	5,4
ENSMUSG00000101711.1	chr1	34439511	34444730	-	529	17	13	23	9	9	17	11	16	9	Gm28306	ENSMUSG00000101711.1	1	ENSMUST00000191315.1	2	527	4692	319	4692	0	4
ENSMUSG00000026127.13	chr1	34439851	34449356	+	8553	5029	6147	4907	5101	5181	5429	4430	5188	5697	Imp4	ENSMUSG00000026127.13	8	ENSMUST00000027303.13,ENSMUST00000187077.1,ENSMUST00000137794.7,ENSMUST00000149962.7,ENSMUST00000134327.1,ENSMUST00000128086.1,ENSMUST00000136770.2,ENSMUST00000191000.1	9,1,6,8,6,3,7,2	5827,2671,652,989,720,467,755,363	3678,0,3299,3493,3370,3035,3718,328	4998,2671,194,322,212,196,156,182	2761,0,2761,2761,2761,2761,2761,328	867,0,291,291,0,0,511,0	1,-1,1,1,-1,-1,-1,-1
ENSMUSG00000026126.15	chr1	34459762	34475733	+	6492	135	212	128	123	156	153	152	147	202	Ptpn18	ENSMUSG00000026126.15	7	ENSMUST00000185610.1,ENSMUST00000027302.13,ENSMUST00000190122.1,ENSMUST00000188884.2,ENSMUST00000186252.1,ENSMUST00000188972.2,ENSMUST00000188019.1	1,15,11,9,2,3,2	1294,1544,904,978,3493,411,282	0,12475,11236,11146,102,2602,952	1294,205,142,257,3400,248,193	0,4789,4789,6336,102,2235,952	0,1347,0,0,0,255,0	-1,1,1,-1,-1,1,-1
ENSMUSG00000100280.2	chr1	34468834	34473148	-	2409	18	19	14	14	15	7	3	19	21	Gm28417	ENSMUSG00000100280.2	3	ENSMUST00000191357.2,ENSMUST00000185218.1,ENSMUST00000185881.1	1,3,2	1600,782,536	0,2211,1067	1600,336,300	0,1939,1067	0,0,0	3,5,4
ENSMUSG00000101223.6	chr1	34477167	34485933	-	1298	0	0	0	1	0	0	0	0	2	4930568A12Rik	ENSMUSG00000101223.6	2	ENSMUST00000188292.6,ENSMUST00000186117.1	5,4	921,494	7523,4457	429,188	4029,2025	0,0	7,6
ENSMUSG00000026125.9	chr1	34498410	34503063	+	1333	0	0	0	0	0	0	0	0	0	Prss39	ENSMUSG00000026125.9	2	ENSMUST00000027299.9,ENSMUST00000191604.1	5,4	1262,550	3391,1161	439,207	1737,600	1099,342	1,1
ENSMUSG00000101116.1	chr1	34523716	34524007	-	292	0	0	0	0	0	0	0	0	0	Gm28416	ENSMUSG00000101116.1	1	ENSMUST00000188334.1	1	291	0	291	0	0	3
ENSMUSG00000026124.4	chr1	34535648	34544313	+	1040	2	0	0	0	0	0	0	1	3	Cfc1	ENSMUSG00000026124.4	1	ENSMUST00000027298.4	6	1034	7631	307	6590	603	1
ENSMUSG00000101803.1	chr1	34538086	34538560	-	475	0	0	0	0	0	0	0	0	0	Gm28419	ENSMUSG00000101803.1	1	ENSMUST00000189108.1	1	474	0	474	0	0	3
ENSMUSG00000037529.13	chr1	34543968	34560943	-	2105	0	0	0	0	4	0	0	0	0	Prss40	ENSMUSG00000037529.13	3	ENSMUST00000115071.3,ENSMUST00000190790.6,ENSMUST00000047840.8	5,3,5	1624,786,1270	15351,4991,7316	777,359,475	11224,3276,3160	0,347,0	3,3,5
ENSMUSG00000045815.4	chr1	34579202	34579711	-	510	2	4	0	5	9	4	2	4	2	1700101I19Rik	ENSMUSG00000045815.4	2	ENSMUST00000186712.1,ENSMUST00000062557.3	1,1	509,389	0,0	509,389	0,0	0,0	3,3
ENSMUSG00000045174.10	chr1	34579657	34590944	+	4392	1345	1483	1551	1797	1690	1668	1210	1165	2371	Amer3	ENSMUSG00000045174.10	1	ENSMUST00000052670.10	2	4390	6897	4281	6897	2342	2
ENSMUSG00000100524.1	chr1	34607297	34607719	-	423	0	0	0	0	0	0	0	0	1	Gm28418	ENSMUSG00000100524.1	1	ENSMUST00000186179.1	1	422	0	422	0	0	3
ENSMUSG00000102499.1	chr1	34610572	34610806	-	235	0	0	1	3	0	0	0	0	0	Gm36984	ENSMUSG00000102499.1	1	ENSMUST00000192770.1	1	234	0	234	0	0	3
ENSMUSG00000103521.1	chr1	34610908	34612303	-	1396	0	0	0	0	0	0	0	0	0	Gm29730	ENSMUSG00000103521.1	1	ENSMUST00000192986.1	1	1395	0	1395	0	0	3
ENSMUSG00000104098.1	chr1	34635544	34636189	-	646	0	0	0	0	0	1	0	0	0	AA619741	ENSMUSG00000104098.1	1	ENSMUST00000195095.1	1	645	0	645	0	0	3
ENSMUSG00000037509.19	chr1	34678188	34813309	+	9561	1318	1715	1616	1755	1431	1591	1535	1397	2308	Arhgef4	ENSMUSG00000037509.19	8	ENSMUST00000159747.8,ENSMUST00000162599.7,ENSMUST00000159021.7,ENSMUST00000047664.15,ENSMUST00000162760.7,ENSMUST00000159059.1,ENSMUST00000160855.1,ENSMUST00000211073.1	14,11,6,10,5,4,6,1	6500,1876,900,3277,2976,1020,2333,170	128051,77838,55363,8328,4521,3956,4837,0	3455,293,179,1631,2159,383,1269,170	47782,47782,42203,2913,2913,2913,2913,0	5554,1876,0,1446,0,0,647,170	1,-1,3,2,-1,-1,2,1
ENSMUSG00000102537.1	chr1	34752775	34752922	+	148	0	0	0	1	3	0	0	4	0	Gm37224	ENSMUSG00000102537.1	1	ENSMUST00000192878.1	1	147	0	147	0	0	-1
ENSMUSG00000102612.1	chr1	34753123	34753477	+	355	0	3	0	0	0	0	3	0	0	Gm37845	ENSMUSG00000102612.1	1	ENSMUST00000194977.1	1	354	0	354	0	0	-1
ENSMUSG00000104002.2	chr1	34809360	34811908	-	2549	150	99	44	109	65	47	22	80	61	Gm38336	ENSMUSG00000104002.2	1	ENSMUST00000193040.2	1	2548	0	2548	0	0	3
ENSMUSG00000037503.12	chr1	34813219	34843065	-	5219	63016	72474	67055	64999	64443	66763	56833	61177	65419	Fam168b	ENSMUSG00000037503.12	8	ENSMUST00000167518.7,ENSMUST00000047534.11,ENSMUST00000170092.7,ENSMUST00000185469.6,ENSMUST00000191307.6,ENSMUST00000185279.1,ENSMUST00000185231.1,ENSMUST00000140534.1	8,7,7,7,7,3,5,3	5050,5023,934,771,837,484,459,522	24781,24816,24795,24862,24188,22917,22846,13901	4185,4178,198,177,206,185,176,237	7886,8758,8758,8804,7886,22819,8847,7886	0,0,0,0,0,0,0,0	7,6,6,4,7,5,7,5
ENSMUSG00000104358.1	chr1	34823525	34826560	+	3036	1	0	0	3	0	0	4	0	0	Gm37127	ENSMUSG00000104358.1	1	ENSMUST00000192924.1	1	3035	0	3035	0	0	-1
ENSMUSG00000026123.11	chr1	34849976	34879580	+	7987	4662	5189	4649	4705	5159	4760	4852	4632	5268	Plekhb2	ENSMUSG00000026123.11	4	ENSMUST00000156687.7,ENSMUST00000027297.10,ENSMUST00000152654.2,ENSMUST00000191722.1	7,8,4,2	5169,3271,340,300	18811,26317,11298,1621	4656,2669,152,157	11810,11810,9896,1621	609,659,0,0	2,2,2,-1
ENSMUSG00000103716.1	chr1	34928509	34930645	+	2137	0	0	0	0	0	0	0	0	0	Gm19430	ENSMUSG00000103716.1	1	ENSMUST00000193847.1	1	2136	0	2136	0	0	-1
ENSMUSG00000103548.1	chr1	34969627	34969855	-	229	10	9	2	7	8	6	8	5	14	Gm37670	ENSMUSG00000103548.1	1	ENSMUST00000193622.1	1	228	0	228	0	0	3
ENSMUSG00000103760.1	chr1	34970065	34970500	+	436	4	2	5	4	7	5	4	1	7	Gm8009	ENSMUSG00000103760.1	1	ENSMUST00000191672.1	1	435	0	435	0	0	-1
ENSMUSG00000103997.1	chr1	34985656	34985890	+	235	1	0	0	0	0	0	0	0	0	Gm38027	ENSMUSG00000103997.1	1	ENSMUST00000192315.1	1	234	0	234	0	0	-1
ENSMUSG00000077231.1	chr1	35178956	35179084	-	129	0	0	0	0	0	0	0	0	0	Gm25096	ENSMUSG00000077231.1	1	ENSMUST00000104043.1	1	128	0	128	0	0	3
ENSMUSG00000104417.1	chr1	35625606	35651297	-	640	0	0	0	0	0	0	0	0	0	Gm37068	ENSMUSG00000104417.1	1	ENSMUST00000195168.1	4	636	25055	330	22203	0	6
ENSMUSG00000064601.1	chr1	35761602	35761706	+	105	0	0	0	0	0	0	0	0	0	Gm25634	ENSMUSG00000064601.1	1	ENSMUST00000082667.1	1	104	0	104	0	0	-1
ENSMUSG00000101714.1	chr1	35806974	35810462	+	452	0	0	0	0	0	0	0	0	0	Gm28415	ENSMUSG00000101714.1	1	ENSMUST00000187528.1	2	450	3038	389	3038	0	-1
ENSMUSG00000102531.1	chr1	35879845	35881119	+	566	0	0	0	0	0	0	0	0	0	1110002O04Rik	ENSMUSG00000102531.1	1	ENSMUST00000194261.1	2	564	710	437	710	0	-1
ENSMUSG00000103096.1	chr1	35958919	35959822	+	904	0	0	0	0	0	0	0	0	2	Gm8022	ENSMUSG00000103096.1	1	ENSMUST00000191763.1	1	903	0	903	0	0	-1
ENSMUSG00000102279.1	chr1	35981960	35986373	-	463	0	0	0	0	0	0	0	0	0	Gm37146	ENSMUSG00000102279.1	1	ENSMUST00000192572.1	3	460	3953	332	2234	0	5
ENSMUSG00000103708.1	chr1	36002985	36011044	-	761	1	0	0	0	2	0	0	1	0	Gm33222	ENSMUSG00000103708.1	2	ENSMUST00000193725.1,ENSMUST00000194823.1	3,3	651,508	7408,7414	421,338	7000,6893	0,0	5,5
ENSMUSG00000104201.1	chr1	36011072	36011894	+	425	0	0	0	0	0	0	0	0	0	4930535G08Rik	ENSMUSG00000104201.1	1	ENSMUST00000192017.1	2	423	399	300	399	0	-1
ENSMUSG00000102434.1	chr1	36029647	36031018	-	1372	0	0	0	0	0	0	0	0	0	Gm38049	ENSMUSG00000102434.1	1	ENSMUST00000195698.1	1	1371	0	1371	0	0	3
ENSMUSG00000045216.7	chr1	36068400	36106446	+	5542	1858	2280	2105	1850	1977	1984	3393	3189	3969	Hs6st1	ENSMUSG00000045216.7	2	ENSMUST00000088174.3,ENSMUST00000194670.1	2,1	3717,3290	34329,0	2933,3290	34329,0	1234,0	1,-1
ENSMUSG00000104523.1	chr1	36105384	36106446	-	447	0	0	0	0	0	0	0	0	0	Gm37335	ENSMUSG00000104523.1	1	ENSMUST00000192656.1	2	445	617	388	617	0	4
ENSMUSG00000102202.1	chr1	36132042	36138746	+	4340	0	6	7	3	2	3	1	0	0	Gm33280	ENSMUSG00000102202.1	1	ENSMUST00000193983.1	4	4336	2368	3334	1253	0	-1
ENSMUSG00000037470.14	chr1	36140027	36244720	-	12853	34224	41543	37978	36215	39189	42902	39504	44600	50098	Uggt1	ENSMUSG00000037470.14	11	ENSMUST00000046875.13,ENSMUST00000173999.7,ENSMUST00000174266.7,ENSMUST00000173250.1,ENSMUST00000174224.7,ENSMUST00000173166.1,ENSMUST00000173082.1,ENSMUST00000174716.7,ENSMUST00000174142.1,ENSMUST00000172592.1,ENSMUST00000192159.1	41,14,40,3,6,13,2,19,7,5,1	8992,3522,5359,623,573,1488,546,3045,670,537,1081	95286,18807,95316,3744,11153,18920,1034,62457,23473,11692,0	4224,1205,765,479,189,206,515,1074,150,262,1081	9128,3304,9128,3304,5676,4588,1034,9128,10307,5064,0	0,0,0,0,436,709,0,0,429,0,0	41,16,8,5,3,8,4,21,4,7,3
ENSMUSG00000098752.1	chr1	36144252	36144313	-	62	22	23	28	14	20	10	22	24	21	Mir6897	ENSMUSG00000098752.1	1	ENSMUST00000184790.1	1	61	0	61	0	0	3
ENSMUSG00000047180.8	chr1	36264597	36274679	-	3217	21	21	9	16	38	17	28	23	27	Neurl3	ENSMUSG00000047180.8	2	ENSMUST00000056946.7,ENSMUST00000188666.2	4,4	2594,1202	6244,4616	1956,840	3637,3637	0,0	4,4
ENSMUSG00000037447.16	chr1	36307733	36324029	+	12540	135	156	200	175	231	155	142	127	139	Arid5a	ENSMUSG00000037447.16	15	ENSMUST00000126413.7,ENSMUST00000142319.7,ENSMUST00000150747.7,ENSMUST00000145179.7,ENSMUST00000124280.7,ENSMUST00000097778.8,ENSMUST00000116629.8,ENSMUST00000115031.7,ENSMUST00000115032.7,ENSMUST00000137906.1,ENSMUST00000192874.1,ENSMUST00000115029.1,ENSMUST00000140218.1,ENSMUST00000147123.7,ENSMUST00000141121.1	7,3,3,6,4,8,6,6,7,5,1,4,2,4,3	863,438,404,733,3114,2262,2050,2996,4633,5499,5013,4325,423,559,397	10607,9250,10130,10727,9019,10510,10724,10321,10604,10776,0,10894,8376,1585,708	211,238,204,222,1972,1534,1536,2079,3999,5037,5013,3996,366,335,297	8376,8373,8373,8376,8373,4241,8373,8376,8373,8373,0,10248,8376,877,422	0,0,0,0,0,1853,176,2049,1766,1594,0,1294,0,0,0	1,1,-1,-1,-1,2,1,1,1,1,-1,3,-1,-1,-1
ENSMUSG00000102762.1	chr1	36332708	36333420	+	713	0	0	0	0	0	0	0	0	0	4930403P22Rik	ENSMUSG00000102762.1	1	ENSMUST00000192234.1	1	712	0	712	0	0	-1
ENSMUSG00000010453.12	chr1	36335730	36369181	-	6742	6592	8587	7820	7273	6418	7675	5615	6465	7216	Kansl3	ENSMUSG00000010453.12	9	ENSMUST00000185912.6,ENSMUST00000010597.9,ENSMUST00000186470.1,ENSMUST00000188961.6,ENSMUST00000188528.6,ENSMUST00000185621.2,ENSMUST00000187628.1,ENSMUST00000185614.1,ENSMUST00000188957.1	21,21,21,22,5,5,2,2,2	4506,4642,2780,2885,758,604,334,2175,165	28921,28809,27661,28713,12564,10422,2079,1071,971	1921,1921,245,284,272,265,272,2123,97	7022,7022,7022,7022,7022,7022,2079,1071,971	0,0,0,-214,0,0,0,0,0	21,21,21,2,2,3,2,4,4
ENSMUSG00000098680.1	chr1	36348682	36348758	-	77	1	3	0	3	2	0	0	0	0	Mir6898	ENSMUSG00000098680.1	1	ENSMUST00000184898.1	1	76	0	76	0	0	3
ENSMUSG00000037432.15	chr1	36372291	36422110	+	6356	0	1	0	0	0	0	0	0	3	Fer1l5	ENSMUSG00000037432.15	3	ENSMUST00000179162.6,ENSMUST00000202030.1,ENSMUST00000140452.3	53,13,12	6262,1407,1711	43554,17958,3511	368,177,371	8874,8836,1439	6064,775,624	1,-1,-1
ENSMUSG00000001143.13	chr1	36419871	36445271	-	7359	2104	2206	2098	2256	2377	2350	2434	2750	2978	Lman2l	ENSMUSG00000001143.13	8	ENSMUST00000192969.5,ENSMUST00000125304.7,ENSMUST00000134594.7,ENSMUST00000115011.7,ENSMUST00000001171.12,ENSMUST00000152088.1,ENSMUST00000123583.1,ENSMUST00000193502.1	6,8,6,9,7,3,6,1	699,3370,4056,2281,2167,631,683,1512	19098,19836,14630,19804,19918,3229,16196,0	164,2438,2263,1317,1317,451,221,1512	10289,10289,10289,9295,11148,3145,10289,0	90,0,0,0,0,263,0,0	6,8,8,9,4,3,2,3
ENSMUSG00000037408.10	chr1	36471620	36508764	+	4829	2299	2634	2536	2421	2283	2531	1939	2127	2337	Cnnm4	ENSMUSG00000037408.10	2	ENSMUST00000153128.1,ENSMUST00000192530.1	7,1	4540,1371	32604,0	2355,1371	24905,0	2309,0	1,-1
ENSMUSG00000104316.1	chr1	36473952	36476110	+	2159	27	27	0	14	9	7	7	11	22	Gm37909	ENSMUSG00000104316.1	1	ENSMUST00000193157.1	1	2158	0	2158	0	0	-1
ENSMUSG00000106081.1	chr1	36506562	36506702	+	141	76	102	69	59	47	78	72	70	118	AC084391.1	ENSMUSG00000106081.1	1	ENSMUST00000200651.1	1	140	0	140	0	0	-1
ENSMUSG00000001138.13	chr1	36511867	36528237	+	6420	1219	1507	1411	1343	1224	1510	1232	1197	1319	Cnnm3	ENSMUSG00000001138.13	5	ENSMUST00000001166.13,ENSMUST00000097776.3,ENSMUST00000154225.1,ENSMUST00000195264.1,ENSMUST00000135100.1	8,9,3,1,4	5185,5283,556,1005,859	11185,11087,6782,0,3980	3071,3071,357,1005,434	5799,5799,5799,0,3327	2134,2119,0,0,0	1,1,-1,-1,-1
ENSMUSG00000102845.1	chr1	36527534	36528237	-	269	0	4	0	0	1	1	0	1	1	Gm38033	ENSMUSG00000102845.1	1	ENSMUST00000192037.1	2	267	436	190	436	0	4
ENSMUSG00000067653.12	chr1	36530188	36536883	-	2697	127	205	116	189	104	153	77	138	115	Ankrd23	ENSMUSG00000067653.12	4	ENSMUST00000193083.5,ENSMUST00000054665.9,ENSMUST00000194853.2,ENSMUST00000193991.2	9,9,8,3	2268,1955,1065,660	4065,3250,3348,2236	1453,1107,315,386	2060,1281,1281,2060	0,0,0,0	9,9,8,5
ENSMUSG00000109510.1	chr1	36530193	36539429	-	2327	171	257	145	202	117	206	123	145	124	Gm42417	ENSMUSG00000109510.1	2	ENSMUST00000191849.5,ENSMUST00000207088.1	8,3	2248,281	6917,5096	1448,146	2656,4920	0,245	8,1
ENSMUSG00000079610.9	chr1	36537507	36547445	-	4654	346	504	341	356	352	356	309	304	422	Ankrd39	ENSMUSG00000079610.9	6	ENSMUST00000207843.1,ENSMUST00000001172.11,ENSMUST00000194894.3,ENSMUST00000207922.1,ENSMUST00000208690.1,ENSMUST00000208269.1	4,4,4,2,3,1	2642,2105,660,436,637,1888	7070,7246,7211,2325,4745,0	2027,1440,238,371,309,1888	4045,4221,4221,2325,4045,0	0,0,0,0,0,0	2,4,4,4,5,3
ENSMUSG00000026121.13	chr1	36548639	36558349	-	4593	6110	6564	6535	6841	6245	6329	5791	5313	6300	Sema4c	ENSMUSG00000026121.13	8	ENSMUST00000191677.5,ENSMUST00000191642.5,ENSMUST00000195620.5,ENSMUST00000114991.7,ENSMUST00000191785.1,ENSMUST00000195160.1,ENSMUST00000193382.5,ENSMUST00000195339.2	15,16,15,15,3,4,4,3	3764,3876,3625,3758,742,614,448,505	5946,5008,5290,5949,426,392,2686,1813	1729,1726,1726,1726,423,304,174,234	1936,1532,1532,1939,323,149,1529,1087	0,0,0,0,0,0,0,0	15,16,15,15,5,6,6,5
ENSMUSG00000087589.3	chr1	36557701	36565613	+	2830	197	271	235	281	223	238	195	144	179	D430040D24Rik	ENSMUSG00000087589.3	2	ENSMUST00000194426.1,ENSMUST00000149224.2	1,3	1966,907	0,6347	1966,799	0,5901	0,0	-1,-1
ENSMUSG00000046337.17	chr1	36562692	36683183	-	3190	9	5	2	3	5	13	11	11	6	Fam178b	ENSMUSG00000046337.17	8	ENSMUST00000170295.7,ENSMUST00000193548.5,ENSMUST00000193763.5,ENSMUST00000194025.1,ENSMUST00000194839.5,ENSMUST00000193155.5,ENSMUST00000195729.1,ENSMUST00000114981.2	15,6,6,6,6,4,5,10	2271,845,899,667,706,431,685,1649	118220,25776,29737,37048,35920,22389,23291,81558	328,324,324,324,176,182,352,315	23889,13611,13611,14158,14405,13611,14120,23889	0,0,0,379,291,0,0,0	15,8,8,5,4,6,7,10
ENSMUSG00000089906.1	chr1	36601802	36602146	+	345	0	0	0	0	0	0	0	0	0	Gm6428	ENSMUSG00000089906.1	1	ENSMUST00000161062.1	1	344	0	344	0	0	-1
ENSMUSG00000077939.1	chr1	36663965	36664039	+	75	0	0	0	0	0	0	0	0	0	Gm24133	ENSMUSG00000077939.1	1	ENSMUST00000104746.1	1	74	0	74	0	0	-1
ENSMUSG00000061518.10	chr1	36691484	36693681	+	1552	8709	10494	7538	8687	8361	9381	8692	8881	9913	Cox5b	ENSMUSG00000061518.10	6	ENSMUST00000193210.5,ENSMUST00000195151.5,ENSMUST00000191790.5,ENSMUST00000192859.1,ENSMUST00000193235.1,ENSMUST00000081180.5	4,3,2,2,4,4	861,341,755,343,358,382	1336,1435,167,522,1383,1316	484,189,656,296,188,189	647,913,167,522,647,647	386,292,0,0,0,154	1,-1,-1,-1,-1,-1
ENSMUSG00000037351.9	chr1	36698114	36714422	-	4274	11707	14385	12778	12080	12244	12566	11386	12234	13202	Actr1b	ENSMUSG00000037351.9	7	ENSMUST00000043951.9,ENSMUST00000159675.1,ENSMUST00000162684.2,ENSMUST00000159448.7,ENSMUST00000160084.1,ENSMUST00000160043.1,ENSMUST00000162662.1	11,2,3,6,6,2,4	3237,325,777,637,722,415,352	8657,113,7498,7278,11916,4270,3019	2064,230,511,138,208,297,113	4270,113,7206,4270,6794,4270,1551	0,0,0,0,0,0,0	11,4,5,8,8,4,6
ENSMUSG00000102416.4	chr1	36710149	36757953	+	1744	11	25	15	20	6	6	15	16	7	4933424G06Rik	ENSMUSG00000102416.4	4	ENSMUST00000192873.2,ENSMUST00000208994.1,ENSMUST00000195374.1,ENSMUST00000193459.2	5,9,1,4	606,1111,392,434	23126,42304,0,13037	342,209,392,209	8550,11219,0,11219	0,796,0,0	1,1,-1,-1
ENSMUSG00000104237.1	chr1	36739048	36744792	-	1633	10	1	6	5	3	0	7	14	6	Gm33533	ENSMUSG00000104237.1	1	ENSMUST00000193853.1	2	1631	4113	1293	4113	0	4
ENSMUSG00000026117.10	chr1	36761798	36782818	+	2992	40	31	21	35	29	37	46	35	76	Zap70	ENSMUSG00000026117.10	4	ENSMUST00000027291.6,ENSMUST00000185871.1,ENSMUST00000186624.1,ENSMUST00000190128.1	13,2,2,6	2232,452,806,1332	18788,3681,577,2499	410,265,586,354	8860,3681,577,1003	1845,0,0,0	2,2,-1,-1
ENSMUSG00000097291.1	chr1	36764863	36765874	-	1012	0	0	0	0	0	0	0	0	0	Gm18828	ENSMUSG00000097291.1	2	ENSMUST00000181035.1,ENSMUST00000180475.1	1,1	309,856	0,0	309,856	0,0	0,0	3,3
ENSMUSG00000026116.11	chr1	36792191	36943666	-	9413	3165	4308	3367	3077	3761	4704	3036	3998	3856	Tmem131	ENSMUSG00000026116.11	8	ENSMUST00000027290.11,ENSMUST00000194563.5,ENSMUST00000191381.1,ENSMUST00000187917.1,ENSMUST00000189470.1,ENSMUST00000190442.1,ENSMUST00000186486.1,ENSMUST00000185964.2	41,42,9,2,5,5,6,6	6505,6656,3960,701,691,510,676,585	140831,140972,11673,1296,3928,2722,5445,101409	1014,1011,1101,446,275,153,183,255	49840,49840,3238,1296,2411,2396,3852,54086	0,0,0,0,257,0,509,0	41,42,11,4,5,7,2,8
ENSMUSG00000103016.1	chr1	36871903	36872045	-	143	4	0	1	0	0	0	0	5	1	Gm37506	ENSMUSG00000103016.1	1	ENSMUST00000192008.1	1	142	0	142	0	0	3
ENSMUSG00000102930.1	chr1	36913601	36916539	-	2413	56	68	84	85	77	50	41	63	33	Gm38115	ENSMUSG00000102930.1	1	ENSMUST00000194317.1	2	2411	527	2352	527	0	4
ENSMUSG00000103159.1	chr1	36922797	36926348	-	3552	53	27	25	45	41	19	22	44	29	F830112A20Rik	ENSMUSG00000103159.1	1	ENSMUST00000194249.1	1	3551	0	3551	0	0	3
ENSMUSG00000080054.3	chr1	36957930	36958427	-	498	2	4	0	2	3	10	3	1	5	Rpl12-ps1	ENSMUSG00000080054.3	1	ENSMUST00000116168.3	1	497	0	497	0	0	3
ENSMUSG00000095944.1	chr1	37005439	37005557	+	119	0	0	0	0	0	0	0	0	0	n-R5s210	ENSMUSG00000095944.1	1	ENSMUST00000177688.1	1	118	0	118	0	0	-1
ENSMUSG00000050122.18	chr1	37026596	37187613	+	5386	86	100	104	118	128	130	85	126	114	Vwa3b	ENSMUSG00000050122.18	10	ENSMUST00000117172.8,ENSMUST00000124404.7,ENSMUST00000067178.13,ENSMUST00000162449.6,ENSMUST00000027289.13,ENSMUST00000194890.1,ENSMUST00000194048.1,ENSMUST00000195450.1,ENSMUST00000169057.2,ENSMUST00000194320.1	8,7,8,8,25,2,5,3,12,2	1628,1245,1761,1352,3369,372,660,459,1487,328	48772,33100,45918,45989,147532,8170,27691,5369,32269,430	629,250,628,358,250,295,158,245,227,269	12818,8451,12818,12818,21684,8170,13635,3204,7988,430	1025,0,1025,1025,2195,0,0,434,456,0	2,2,2,2,1,-1,-1,-1,1,-1
ENSMUSG00000103603.1	chr1	37132273	37133264	-	992	2	1	0	0	5	0	2	1	0	Gm37020	ENSMUSG00000103603.1	1	ENSMUST00000195303.1	1	991	0	991	0	0	3
ENSMUSG00000026114.14	chr1	37214434	37263384	+	3957	8	0	10	1	1	10	13	6	23	Cnga3	ENSMUSG00000026114.14	4	ENSMUST00000191981.5,ENSMUST00000195272.5,ENSMUST00000194195.5,ENSMUST00000027288.9	5,7,6,6	646,2190,2077,3548	26860,41615,41728,40631	199,1487,1487,2687	12671,13768,13768,12671	0,2004,1891,1891	4,2,2,2
ENSMUSG00000102231.1	chr1	37299352	37299697	-	346	0	0	0	0	0	0	0	2	0	1700074A21Rik	ENSMUSG00000102231.1	1	ENSMUST00000192404.1	1	345	0	345	0	0	3
ENSMUSG00000026113.17	chr1	37299865	37410736	+	10387	1649	2063	1879	1945	2024	2180	1595	1721	2350	Inpp4a	ENSMUSG00000026113.17	13	ENSMUST00000146676.1,ENSMUST00000027287.10,ENSMUST00000193024.1,ENSMUST00000140264.7,ENSMUST00000132401.7,ENSMUST00000136846.7,ENSMUST00000132615.7,ENSMUST00000193774.5,ENSMUST00000137266.7,ENSMUST00000058307.14,ENSMUST00000114933.8,ENSMUST00000168546.2,ENSMUST00000123124.1	2,26,1,24,25,26,25,10,24,15,16,16,3	367,5665,2873,3652,3209,3550,3013,1233,2910,2948,2988,2948,460	48280,105180,0,95990,104772,104875,43280,49839,47430,32269,32237,32270,1943	253,2609,2873,791,255,606,241,342,255,985,993,990,218	48280,57225,0,57225,56917,56917,5558,25538,9207,7638,4529,7638,1080	0,2796,0,2651,2896,2793,2841,912,2910,2025,2057,2024,0	-1,3,-1,3,3,3,2,2,1,1,1,1,-1
ENSMUSG00000086064.1	chr1	37329667	37334172	-	861	0	0	0	0	0	0	0	0	0	4930439A04Rik	ENSMUSG00000086064.1	2	ENSMUST00000137241.1,ENSMUST00000141402.1	3,2	736,403	3753,230	455,295	3523,230	0,0	5,4
ENSMUSG00000102879.1	chr1	37330971	37331504	-	534	0	0	0	0	0	0	0	0	0	Gm37135	ENSMUSG00000102879.1	1	ENSMUST00000192652.1	1	533	0	533	0	0	3
ENSMUSG00000026112.7	chr1	37417084	37430103	-	5220	9736	11203	9676	9399	9795	10402	9592	9737	10611	Coa5	ENSMUSG00000026112.7	2	ENSMUST00000027286.6,ENSMUST00000192179.1	3,1	3860,1488	9159,0	3543,1488	7715,0	0,0	3,3
ENSMUSG00000026111.15	chr1	37430139	37439124	+	1579	7565	8569	7478	6868	8065	8486	7038	7214	7902	Unc50	ENSMUSG00000026111.15	7	ENSMUST00000114925.9,ENSMUST00000027285.12,ENSMUST00000144617.7,ENSMUST00000193979.5,ENSMUST00000118059.2,ENSMUST00000193713.1,ENSMUST00000134184.1	6,6,5,4,6,2,4	1088,1408,803,814,1173,331,726	7757,7546,6498,6270,7612,1015,5542	302,442,283,307,305,257,235	4491,4491,4491,4491,4491,1015,4491	775,775,0,0,775,0,0	2,2,2,2,2,2,-1
ENSMUSG00000026110.15	chr1	37439340	37541016	-	12881	1414	1715	1412	1665	1636	1508	1414	1379	1751	Mgat4a	ENSMUSG00000026110.15	8	ENSMUST00000042161.14,ENSMUST00000151952.7,ENSMUST00000154819.7,ENSMUST00000143636.7,ENSMUST00000149791.7,ENSMUST00000148047.1,ENSMUST00000194660.1,ENSMUST00000195598.1	15,16,15,13,5,5,1,1	7015,7235,2781,1789,419,382,3112,3038	89880,94441,89907,50021,32801,32797,0,0	5345,5345,969,365,133,133,3112,3038	37299,37299,37299,23677,23681,23677,0,0	0,0,0,0,0,0,0,0	15,16,15,13,4,7,3,3
ENSMUSG00000103948.1	chr1	37485851	37488605	-	2755	31	36	42	51	45	40	33	34	33	4930594C11Rik	ENSMUSG00000103948.1	1	ENSMUST00000192316.1	1	2754	0	2754	0	0	3
ENSMUSG00000087233.1	chr1	37487193	37488982	-	1790	31	30	43	41	36	37	32	31	33	Gm43213	ENSMUSG00000087233.1	1	ENSMUST00000151866.1	1	1789	0	1789	0	0	3
ENSMUSG00000026090.16	chr1	37611677	37720085	-	5075	31	64	50	42	52	67	44	56	84	2010300C02Rik	ENSMUSG00000026090.16	3	ENSMUST00000160023.5,ENSMUST00000162875.7,ENSMUST00000160589.1	4,10,4	2534,4624,784	11031,103784,81025	1481,2307,437	9093,74930,42791	582,0,0	4,10,6
ENSMUSG00000089767.1	chr1	37614259	37615372	+	560	0	0	0	0	0	0	0	0	0	4930556I23Rik	ENSMUSG00000089767.1	1	ENSMUST00000160659.1	2	558	555	473	555	0	-1
ENSMUSG00000104365.1	chr1	37660722	37662647	+	1926	0	0	0	0	0	0	0	0	0	4930470B04Rik	ENSMUSG00000104365.1	1	ENSMUST00000192005.1	1	1925	0	1925	0	0	-1
ENSMUSG00000102650.1	chr1	37694447	37696664	-	2218	4	0	0	1	0	0	0	2	0	Gm19863	ENSMUSG00000102650.1	1	ENSMUST00000192480.1	1	2217	0	2217	0	0	3
ENSMUSG00000060771.14	chr1	37754776	37866429	-	10662	5536	5773	4843	5765	5935	6172	3233	3659	4287	Tsga10	ENSMUSG00000060771.14	8	ENSMUST00000041815.14,ENSMUST00000114902.7,ENSMUST00000088072.9,ENSMUST00000151735.7,ENSMUST00000123082.7,ENSMUST00000155852.6,ENSMUST00000193669.1,ENSMUST00000134024.1	20,18,18,13,8,8,8,2	3380,2706,3819,1995,3945,2853,1973,3131	106923,91845,101787,51889,28488,28785,28829,528	745,272,1323,442,2932,1900,1064,2536	20308,20308,38211,14546,9353,9650,9650,528	0,0,0,0,0,0,0,0	20,18,18,10,8,8,8,4
ENSMUSG00000097268.1	chr1	37865299	37871388	+	3089	28	13	4	16	17	13	31	29	39	Gm26805	ENSMUSG00000097268.1	1	ENSMUST00000181885.1	2	3087	3002	2880	3002	0	-1
ENSMUSG00000037216.5	chr1	37871738	37876228	+	2051	736	930	822	717	731	796	930	795	994	Lipt1	ENSMUSG00000037216.5	4	ENSMUST00000128085.1,ENSMUST00000041621.4,ENSMUST00000142670.1,ENSMUST00000144440.1	2,2,2,2	772,1483,810,773	2833,2539,2276,2219	479,1364,596,690	2833,2539,2276,2219	0,1121,0,0	2,2,2,2
ENSMUSG00000026088.15	chr1	37874801	37890411	-	2770	2833	3383	2729	2837	2988	3092	2791	2986	3012	Mitd1	ENSMUSG00000026088.15	5	ENSMUST00000139725.7,ENSMUST00000027257.9,ENSMUST00000131754.1,ENSMUST00000127170.1,ENSMUST00000138806.1	8,7,2,4,3	1167,1224,667,719,986	14439,10299,561,2161,7361	324,475,497,375,769	4844,4844,561,1313,4844	0,0,0,0,0	7,7,4,6,5
ENSMUSG00000026087.11	chr1	37890477	37898535	+	3226	9740	11379	9131	10174	10307	9958	10138	10256	11279	Mrpl30	ENSMUSG00000026087.11	7	ENSMUST00000027256.11,ENSMUST00000193673.5,ENSMUST00000161694.1,ENSMUST00000160082.2,ENSMUST00000194857.5,ENSMUST00000195373.1,ENSMUST00000162513.1	6,5,2,3,5,4,2	963,657,354,1754,496,583,642	7095,7175,2359,1687,4736,3820,227	474,303,303,1629,146,277,578	2359,3355,2359,916,2278,2278,227	479,479,0,0,0,479,0	3,2,-1,3,2,1,-1
ENSMUSG00000061584.6	chr1	37905923	37916493	-	2564	0	1	0	2	7	0	0	4	0	Lyg2	ENSMUSG00000061584.6	1	ENSMUST00000078307.6	6	2558	8012	1752	4518	0	6
ENSMUSG00000087374.1	chr1	37933596	37954136	+	3990	0	0	0	0	0	0	0	0	0	Gm15457	ENSMUSG00000087374.1	1	ENSMUST00000129513.1	6	3984	16556	3125	12968	0	-1
ENSMUSG00000026085.11	chr1	37946736	37957759	-	888	0	0	0	0	0	0	0	0	0	Lyg1	ENSMUSG00000026085.11	3	ENSMUST00000144184.1,ENSMUST00000027254.9,ENSMUST00000114894.1	3,6,6	483,794,792	1780,10229,10229	267,267,265	1606,4921,4921	0,0,0	5,6,6
ENSMUSG00000089141.1	chr1	37973967	37974203	+	237	0	0	0	0	0	0	0	0	0	Gm23409	ENSMUSG00000089141.1	1	ENSMUST00000158516.1	1	236	0	236	0	0	-1
ENSMUSG00000058407.12	chr1	37985189	37997893	-	9102	17199	18823	15850	16394	17268	17887	18196	18993	22211	Txndc9	ENSMUSG00000058407.12	8	ENSMUST00000162031.7,ENSMUST00000193832.5,ENSMUST00000195247.5,ENSMUST00000194747.1,ENSMUST00000192960.5,ENSMUST00000195032.5,ENSMUST00000192237.1,ENSMUST00000194692.1	5,4,5,4,3,5,4,1	3376,3468,1694,2601,469,1439,694,1347	8750,6381,8805,7227,7736,8534,5706,0	2590,3063,729,1849,212,723,208,1347	3535,3535,3535,3535,6213,3535,3535,0	0,0,0,0,0,0,0,0	5,4,5,6,3,5,6,3
ENSMUSG00000026083.12	chr1	37998010	38055579	+	9753	10944	16354	12447	14041	13154	15421	12626	17694	18125	Eif5b	ENSMUSG00000026083.12	5	ENSMUST00000027252.7,ENSMUST00000192548.5,ENSMUST00000193806.5,ENSMUST00000193151.5,ENSMUST00000195664.1	24,22,3,5,5	7773,5766,476,573,685	49796,48126,3173,3237,3484	3973,1097,229,182,201	19482,19482,2684,1803,2050	3627,0,0,0,0	1,-1,-1,-1,-1
ENSMUSG00000026082.11	chr1	38052786	38129801	-	6168	13956	17937	15137	14752	15006	15833	14445	14570	17349	Rev1	ENSMUSG00000026082.11	11	ENSMUST00000027251.11,ENSMUST00000194650.5,ENSMUST00000193008.1,ENSMUST00000193113.1,ENSMUST00000194815.5,ENSMUST00000193472.1,ENSMUST00000192697.1,ENSMUST00000193922.1,ENSMUST00000192594.5,ENSMUST00000193697.5,ENSMUST00000195383.1	23,18,2,2,6,6,3,2,6,4,4	4239,3558,828,391,598,771,684,465,546,366,476	72637,31778,122,792,15571,13500,6028,4306,35604,29042,21642	703,708,418,360,154,199,374,320,168,126,339	20995,4306,122,792,4306,4847,4267,4306,12666,19785,19785	0,0,0,0,323,529,0,0,0,0,0	23,20,4,4,3,3,5,4,8,6,6
ENSMUSG00000103804.1	chr1	38076295	38077305	-	701	77	33	34	64	72	74	49	69	63	Gm37062	ENSMUSG00000103804.1	1	ENSMUST00000195028.1	2	699	311	577	311	0	4
ENSMUSG00000102716.1	chr1	38132083	38159892	+	1848	0	1	1	0	0	0	0	0	0	Gm5099	ENSMUSG00000102716.1	1	ENSMUST00000194892.1	6	1842	25967	1261	12120	0	-1
ENSMUSG00000037138.17	chr1	38177326	38664955	-	6654	5552	7603	7115	8290	7459	7340	16568	11964	19027	Aff3	ENSMUSG00000037138.17	6	ENSMUST00000095027.8,ENSMUST00000039827.13,ENSMUST00000136641.2,ENSMUST00000027250.13,ENSMUST00000134963.1,ENSMUST00000212668.1	22,23,7,8,4,4	5835,5987,754,1638,661,416	444024,481641,15427,327886,129135,91172	2244,2243,221,442,312,120	128363,128363,4164,128363,127912,88088	0,0,0,0,0,0	22,23,9,10,3,6
ENSMUSG00000085391.1	chr1	38235420	38246666	+	912	12	14	6	17	4	11	8	12	1	Gm16150	ENSMUSG00000085391.1	2	ENSMUST00000127620.1,ENSMUST00000133299.1	4,4	433,669	9750,6297	170,267	5610,5610	0,0	-1,-1
ENSMUSG00000085280.1	chr1	38307902	38311930	+	639	0	0	0	0	0	0	0	0	0	Gm16151	ENSMUSG00000085280.1	1	ENSMUST00000129696.1	3	636	3392	318	3131	0	-1
ENSMUSG00000087131.7	chr1	38384949	38393974	+	1853	2	1	0	1	0	0	0	0	3	Gm16152	ENSMUSG00000087131.7	2	ENSMUST00000143261.7,ENSMUST00000131663.1	5,3	1184,869	7841,546	425,679	4149,382	0,0	-1,-1
ENSMUSG00000102984.1	chr1	38487519	38488047	+	529	0	0	0	0	0	0	0	0	0	Gm34727	ENSMUSG00000102984.1	1	ENSMUST00000195175.1	1	528	0	528	0	0	-1
ENSMUSG00000102541.1	chr1	38722620	38723121	+	502	0	0	0	0	0	0	0	0	0	Gm38135	ENSMUSG00000102541.1	1	ENSMUST00000195068.1	1	501	0	501	0	0	-1
ENSMUSG00000103531.1	chr1	38767184	38767686	+	503	0	0	0	0	0	0	0	0	5	2610300A13Rik	ENSMUSG00000103531.1	1	ENSMUST00000192930.1	1	502	0	502	0	0	-1
ENSMUSG00000048814.10	chr1	38793645	38836711	-	7506	4049	4451	3609	4165	4262	4556	4396	4296	6184	Lonrf2	ENSMUSG00000048814.10	3	ENSMUST00000147695.7,ENSMUST00000039612.4,ENSMUST00000191724.1	12,11,1	6920,5066,1177	36146,21640,0	4578,3714,1177	14506,3755,0	0,0,0	12,11,3
ENSMUSG00000026080.13	chr1	38863867	38898161	-	11964	1947	2267	1988	2141	2235	2360	2529	2304	3083	Chst10	ENSMUSG00000026080.13	8	ENSMUST00000027249.11,ENSMUST00000193441.5,ENSMUST00000192948.5,ENSMUST00000194361.5,ENSMUST00000194657.1,ENSMUST00000193435.5,ENSMUST00000192175.1,ENSMUST00000195731.1	7,6,5,6,6,5,2,3	2968,4993,1081,2990,2425,692,5520,4277	31175,29229,6804,31294,25585,23493,1834,3100	2168,4219,423,2158,1692,244,5424,4038	11456,11456,3515,13409,11456,10310,1834,1834	0,0,358,0,0,0,0,0	7,6,4,6,4,7,4,5
ENSMUSG00000103647.1	chr1	38884754	38888072	+	325	0	0	0	1	0	0	0	2	0	Gm37707	ENSMUSG00000103647.1	1	ENSMUST00000195309.1	2	323	2995	179	2995	0	-1
ENSMUSG00000102447.1	chr1	38907945	38908716	+	772	6	1	0	2	5	0	1	1	4	Gm6621	ENSMUSG00000102447.1	1	ENSMUST00000193251.1	1	771	0	771	0	0	-1
ENSMUSG00000067604.8	chr1	38939149	38950276	+	1001	0	0	0	0	1	0	0	2	4	Nms	ENSMUSG00000067604.8	2	ENSMUST00000088029.7,ENSMUST00000160214.1	10,8	991,489	10136,8951	393,158	2150,2150	453,0	1,1
ENSMUSG00000026078.10	chr1	38985608	38997238	+	4219	15881	18723	16730	16010	17486	16030	16897	15623	18319	Pdcl3	ENSMUSG00000026078.10	4	ENSMUST00000027247.10,ENSMUST00000193489.1,ENSMUST00000194552.1,ENSMUST00000193073.1	6,3,5,3	3908,327,638,941	7722,6749,7304,545	2241,196,204,505	3540,3540,3540,347	717,265,0,0	1,1,3,-1
ENSMUSG00000103046.1	chr1	38992678	38994316	+	1639	225	227	130	351	191	134	182	169	196	Gm37309	ENSMUSG00000103046.1	1	ENSMUST00000194994.1	1	1638	0	1638	0	0	-1
ENSMUSG00000104188.1	chr1	39048648	39057637	-	1843	0	0	0	0	0	0	0	0	0	Gm37821	ENSMUSG00000104188.1	1	ENSMUST00000195476.1	2	1841	7148	1394	7148	0	4
ENSMUSG00000103182.1	chr1	39081252	39083338	-	2087	0	0	0	0	0	0	0	0	0	Gm37091	ENSMUSG00000103182.1	1	ENSMUST00000195455.1	1	2086	0	2086	0	0	3
ENSMUSG00000098833.1	chr1	39186896	39186992	-	97	0	0	0	0	0	0	0	0	0	Mir6349	ENSMUSG00000098833.1	1	ENSMUST00000184059.1	1	96	0	96	0	0	3
ENSMUSG00000026077.15	chr1	39193731	39363236	+	4791	2	11	4	10	8	11	1	0	4	Npas2	ENSMUSG00000026077.15	3	ENSMUST00000173050.7,ENSMUST00000056815.8,ENSMUST00000172825.1	3,21,2	481,4215,472	93403,164809,3439	278,1381,275	69310,68577,3439	0,2431,0	2,2,-1
ENSMUSG00000092553.1	chr1	39276283	39276565	-	283	0	0	0	0	0	0	0	0	0	Gm20428	ENSMUSG00000092553.1	1	ENSMUST00000174365.1	1	282	0	282	0	0	3
ENSMUSG00000092563.1	chr1	39314899	39315453	+	555	0	1	0	3	0	0	0	2	0	Gm3617	ENSMUSG00000092563.1	1	ENSMUST00000173076.1	1	554	0	554	0	0	-1
ENSMUSG00000073702.11	chr1	39367842	39371911	+	1662	41376	46609	40146	40235	44881	45654	43674	44723	47363	Rpl31	ENSMUSG00000073702.11	6	ENSMUST00000086535.11,ENSMUST00000194746.5,ENSMUST00000178079.7,ENSMUST00000179954.7,ENSMUST00000195123.5,ENSMUST00000191855.1	5,4,5,4,4,3	1044,699,482,626,352,465	3025,2789,2953,2810,2865,1051	609,412,125,326,125,289	1759,1759,1759,1759,1759,815	374,387,374,374,261,0	2,2,2,1,1,-1
ENSMUSG00000003134.10	chr1	39371492	39478755	-	5239	899	1141	1092	897	1008	1081	604	634	785	Tbc1d8	ENSMUSG00000003134.10	5	ENSMUST00000054462.10,ENSMUST00000192099.1,ENSMUST00000192531.5,ENSMUST00000193823.1,ENSMUST00000195854.1	20,2,19,19,2	4431,452,3415,3493,663	102832,114,102950,101891,770	1294,270,490,508,574	52262,114,52262,52262,770	0,370,0,0,0	20,1,4,19,4
ENSMUSG00000102607.1	chr1	39419048	39419932	-	885	2	5	0	3	2	10	0	0	5	Gm37265	ENSMUSG00000102607.1	1	ENSMUST00000191698.1	1	884	0	884	0	0	3
ENSMUSG00000065629.2	chr1	39519533	39519747	+	215	145	166	114	89	170	115	215	178	149	Gm24826	ENSMUSG00000065629.2	1	ENSMUST00000083695.2	1	214	0	214	0	0	-1
ENSMUSG00000104827.1	chr1	39519533	39519748	+	216	145	166	114	89	170	115	215	178	149	Gm24826	ENSMUSG00000104827.1	1	ENSMUST00000197298.1	1	215	0	215	0	0	-1
ENSMUSG00000003135.15	chr1	39534992	39546889	+	3508	6578	7593	7005	7216	6894	7473	5532	5970	7057	Cnot11	ENSMUSG00000003135.15	4	ENSMUST00000161515.7,ENSMUST00000003219.13,ENSMUST00000160145.1,ENSMUST00000195567.1	8,7,5,5	3474,3155,2092,630	8423,7916,6146,4737	1820,1804,1414,208	2325,2325,2325,2325	1511,1511,0,445	2,1,-1,-1
ENSMUSG00000085894.1	chr1	39547570	39552002	-	1832	3488	4528	4335	3879	4012	4374	4663	4659	6135	Gm15832	ENSMUSG00000085894.1	1	ENSMUST00000146314.1	3	1829	2603	1548	1338	0	5
ENSMUSG00000077704.1	chr1	39548745	39548854	-	110	164	189	106	117	161	179	160	188	131	Snord89	ENSMUSG00000077704.1	1	ENSMUST00000104516.1	1	109	0	109	0	0	3
ENSMUSG00000048234.13	chr1	39551296	39577405	-	2838	8047	9740	9240	8386	8999	9382	10371	10451	12892	Rnf149	ENSMUSG00000048234.13	4	ENSMUST00000062525.10,ENSMUST00000195136.1,ENSMUST00000153381.1,ENSMUST00000195705.1	7,6,2,2	2485,662,507,387	23624,24225,2645,11823	1219,250,442,239	11495,12000,2645,11823	0,0,0,0	7,5,4,2
ENSMUSG00000064936.1	chr1	39573746	39573875	-	130	6	12	0	9	13	10	11	4	14	Gm23722	ENSMUSG00000064936.1	1	ENSMUST00000083002.1	1	129	0	129	0	0	3
ENSMUSG00000102471.1	chr1	39597417	39598005	-	589	1	0	0	1	0	0	0	0	1	Gm5100	ENSMUSG00000102471.1	1	ENSMUST00000195631.1	1	588	0	588	0	0	3
ENSMUSG00000050967.5	chr1	39618406	39651474	-	6091	65	13	36	44	25	30	71	40	98	Creg2	ENSMUSG00000050967.5	1	ENSMUST00000053355.5	4	6087	26981	4837	22793	0	4
ENSMUSG00000097083.1	chr1	39650176	39657390	+	3663	0	2	0	0	0	0	2	3	0	D930019O06Rik	ENSMUSG00000097083.1	1	ENSMUST00000181841.1	2	3661	3553	2413	3553	0	-1
ENSMUSG00000057173.8	chr1	39665301	39720997	-	2139	29	50	46	32	22	16	45	40	47	Rfx8	ENSMUSG00000057173.8	2	ENSMUST00000151913.2,ENSMUST00000126760.1	15,7	1993,704	53703,10235	356,150	14197,2965	0,0	15,9
ENSMUSG00000091937.3	chr1	39804148	39805332	-	352	0	0	0	0	0	0	2	0	0	Gm3646	ENSMUSG00000091937.3	1	ENSMUST00000171319.3	2	350	834	191	834	0	2
ENSMUSG00000101634.6	chr1	39839175	39847334	-	1068	0	0	0	0	0	7	2	4	0	1700066B17Rik	ENSMUSG00000101634.6	3	ENSMUST00000187091.6,ENSMUST00000191299.6,ENSMUST00000186683.1	4,5,3	671,531,264	5853,4376,4642	429,181,128	4490,1463,2672	0,0,0	6,7,5
ENSMUSG00000026074.14	chr1	39900913	40026310	+	9579	72004	95844	83137	92518	74758	83476	59475	67401	81622	Map4k4	ENSMUSG00000026074.14	18	ENSMUST00000168431.6,ENSMUST00000163854.8,ENSMUST00000193661.1,ENSMUST00000191761.5,ENSMUST00000193682.5,ENSMUST00000195860.5,ENSMUST00000195259.5,ENSMUST00000195636.5,ENSMUST00000192509.5,ENSMUST00000193514.5,ENSMUST00000194163.1,ENSMUST00000195356.1,ENSMUST00000192355.5,ENSMUST00000191964.1,ENSMUST00000191865.1,ENSMUST00000192194.1,ENSMUST00000192884.1,ENSMUST00000191657.1	30,31,2,12,31,32,30,31,31,5,3,2,5,4,6,1,2,2	5602,5751,1063,1260,3728,3928,3689,4051,3887,375,215,409,706,625,701,1936,542,424	119795,119646,223,87848,119847,119647,119885,119694,119808,18610,11681,557,6143,4391,9279,0,304,791	1681,1681,947,189,210,230,210,340,296,125,125,379,230,224,175,1936,371,309	60604,60604,223,60604,60604,60604,60604,60604,60604,9723,9026,557,3008,3014,4058,0,304,791	3687,3836,0,0,3635,3835,3597,3788,3674,0,0,0,0,0,0,0,0,0	1,1,-1,1,1,1,1,1,1,-1,-1,-1,-1,-1,-1,-1,-1,-1
ENSMUSG00000102985.1	chr1	40049039	40050368	-	1330	4	5	5	7	4	5	1	0	8	4930456G14Rik	ENSMUSG00000102985.1	1	ENSMUST00000193054.1	1	1329	0	1329	0	0	3
ENSMUSG00000026073.13	chr1	40074079	40125231	+	1908	9	14	35	24	9	14	16	17	19	Il1r2	ENSMUSG00000026073.13	4	ENSMUST00000191671.5,ENSMUST00000027243.12,ENSMUST00000195770.1,ENSMUST00000194913.1	4,9,8,2	756,1410,1046,364	37301,39123,39381,16087	258,258,180,317	28141,17570,17570,16087	0,1225,226,0	2,2,2,2
ENSMUSG00000097899.2	chr1	40076228	40085851	-	842	37	41	22	45	25	30	6	37	20	Gm16894	ENSMUSG00000097899.2	1	ENSMUST00000181756.2	4	838	8785	410	8329	0	6
ENSMUSG00000102975.1	chr1	40088511	40091581	+	3071	0	0	0	5	0	0	4	0	0	Gm37347	ENSMUSG00000102975.1	1	ENSMUST00000193969.1	1	3070	0	3070	0	0	-1
ENSMUSG00000026072.12	chr1	40225080	40317257	+	6363	102	119	161	126	117	127	163	161	122	Il1r1	ENSMUSG00000026072.12	3	ENSMUST00000027241.10,ENSMUST00000114795.2,ENSMUST00000195402.1	11,11,4	5808,4821,469	86369,44794,10052	4282,3226,224	56927,15352,8611	1720,1712,0	1,2,-1
ENSMUSG00000103560.1	chr1	40238020	40244499	+	6480	6	2	31	48	49	33	1	20	44	Gm38070	ENSMUSG00000103560.1	1	ENSMUST00000191850.1	1	6479	0	6479	0	0	-1
ENSMUSG00000070942.8	chr1	40324610	40367562	+	6812	59	66	80	61	93	49	74	75	101	Il1rl2	ENSMUSG00000070942.8	4	ENSMUST00000192551.1,ENSMUST00000095020.8,ENSMUST00000194296.5,ENSMUST00000193388.1	2,11,11,4	3466,1939,3897,689	1365,38905,38975,2871	2996,444,2535,234	1365,13859,13859,1365	0,1715,1715,0	-1,2,2,2
ENSMUSG00000103230.1	chr1	40353852	40354536	+	685	0	0	2	0	0	0	1	0	0	Gm17970	ENSMUSG00000103230.1	1	ENSMUST00000192199.1	1	684	0	684	0	0	-1
ENSMUSG00000026069.15	chr1	40429570	40465415	+	6894	10	11	21	22	13	18	10	18	6	Il1rl1	ENSMUSG00000026069.15	5	ENSMUST00000174335.7,ENSMUST00000173881.7,ENSMUST00000097772.9,ENSMUST00000173514.7,ENSMUST00000053043.7	8,3,11,8,10	1208,372,5291,2653,5043	15945,4446,20497,5719,19725	210,200,3649,1618,3630	10998,3982,9906,1685,9906	1007,0,1694,1007,1694	2,2,2,2,1
ENSMUSG00000026070.15	chr1	40465552	40500854	+	4817	0	0	5	2	5	0	4	0	5	Il18r1	ENSMUSG00000026070.15	6	ENSMUST00000167723.7,ENSMUST00000193391.5,ENSMUST00000193793.5,ENSMUST00000087983.7,ENSMUST00000195684.5,ENSMUST00000108044.3	10,10,8,12,12,11	1909,1728,1644,2814,2838,4147	24117,24176,23964,32013,32009,30701	520,522,520,827,800,2516	5372,5460,5460,5372,5372,5372	1111,1111,797,1604,1604,1604	3,3,2,2,2,2
ENSMUSG00000026068.11	chr1	40515362	40551705	+	6752	125	160	101	129	107	82	231	186	235	Il18rap	ENSMUSG00000026068.11	4	ENSMUST00000027237.11,ENSMUST00000163057.7,ENSMUST00000159724.1,ENSMUST00000160468.1	13,9,6,3	4876,1430,2441,619	31467,22650,9028,5592	3080,321,1713,346	7681,7681,7681,4640	1835,0,0,0	4,-1,-1,-1
ENSMUSG00000104441.1	chr1	40572188	40580662	-	479	0	0	0	0	0	0	0	0	0	Gm35801	ENSMUSG00000104441.1	2	ENSMUST00000193927.1,ENSMUST00000194262.1	3,2	476,317	7998,8123	206,192	5805,8123	0,0	5,4
ENSMUSG00000026065.8	chr1	40580081	40630725	+	4562	0	3	0	2	0	0	0	3	1	Slc9a4	ENSMUSG00000026065.8	4	ENSMUST00000027233.8,ENSMUST00000192849.1,ENSMUST00000193371.1,ENSMUST00000192454.1	12,3,3,1	3950,1329,339,1448	46694,3892,1962,0	1488,567,259,1448	16448,3088,1824,0	2382,0,0,0	1,-1,-1,-1
ENSMUSG00000102676.1	chr1	40582895	40586841	-	3947	0	0	0	0	0	0	0	0	0	Gm37435	ENSMUSG00000102676.1	1	ENSMUST00000192078.1	1	3946	0	3946	0	0	3
ENSMUSG00000026062.12	chr1	40680574	40769273	+	6984	4	7	5	0	0	13	3	4	16	Slc9a2	ENSMUSG00000026062.12	3	ENSMUST00000027231.12,ENSMUST00000192345.1,ENSMUST00000192294.1	12,3,2	5007,2504,854	83692,43580,461	1647,1473,812	36430,36430,461	2433,1008,0	1,1,-1
ENSMUSG00000103679.1	chr1	40691442	40697636	-	803	1	0	0	0	0	0	0	0	0	Gm37623	ENSMUSG00000103679.1	1	ENSMUST00000193691.1	3	800	5394	542	2971	0	5
ENSMUSG00000103270.1	chr1	40771385	40785343	+	3261	0	0	0	0	0	0	0	0	0	Gm37915	ENSMUSG00000103270.1	1	ENSMUST00000195134.1	3	3258	10700	2710	6367	0	-1
ENSMUSG00000041945.12	chr1	40772038	40790687	-	5125	400	453	488	408	486	530	501	480	688	Mfsd9	ENSMUSG00000041945.12	3	ENSMUST00000039672.5,ENSMUST00000131390.7,ENSMUST00000144385.1	6,7,4	3154,3304,2421	15471,15342,7006	2508,2505,1833	6835,6835,2868	0,0,0	6,2,6
ENSMUSG00000079588.3	chr1	40805601	40856887	+	2716	1	6	11	5	13	9	5	1	0	Tmem182	ENSMUSG00000079588.3	1	ENSMUST00000114765.3	5	2711	48575	2091	30578	685	1
ENSMUSG00000094136.2	chr1	40863737	40864232	-	496	0	0	0	0	0	0	0	0	0	Gm5973	ENSMUSG00000094136.2	1	ENSMUST00000178542.2	1	495	0	495	0	0	3
ENSMUSG00000104072.1	chr1	41167587	41181252	-	546	0	1	0	0	0	0	0	3	0	4930448I06Rik	ENSMUSG00000104072.1	1	ENSMUST00000194002.1	3	543	13122	253	8538	0	5
ENSMUSG00000100185.1	chr1	41526931	41529543	-	2613	3	3	0	0	0	0	0	0	0	Gm28634	ENSMUSG00000100185.1	1	ENSMUST00000191087.1	1	2612	0	2612	0	0	3
ENSMUSG00000100832.1	chr1	41781808	41939560	+	3198	3897	4948	4205	4114	4124	3938	33	68	62	Gm29260	ENSMUSG00000100832.1	2	ENSMUST00000186391.1,ENSMUST00000187227.1	6,2	2753,550	154999,1183	2124,374	113687,1183	0,0	-1,-1
ENSMUSG00000100178.1	chr1	42103289	42104333	+	1045	1	3	4	0	1	0	0	0	0	Gm5267	ENSMUSG00000100178.1	1	ENSMUST00000191574.1	1	1044	0	1044	0	0	-1
ENSMUSG00000101877.1	chr1	42179290	42180388	-	1099	0	0	0	0	0	0	0	0	0	Gm8176	ENSMUSG00000101877.1	1	ENSMUST00000191297.1	1	1098	0	1098	0	0	3
ENSMUSG00000053640.2	chr1	42229726	42231108	+	1383	163	209	162	240	203	230	42	30	114	Gm9915	ENSMUSG00000053640.2	2	ENSMUST00000066196.1,ENSMUST00000188087.1	1,1	1382,1381	0,0	1382,1381	0,0	0,0	-1,-1
ENSMUSG00000101919.1	chr1	42238233	42238695	-	463	0	0	0	0	0	0	0	0	0	Gm29664	ENSMUSG00000101919.1	1	ENSMUST00000191125.1	1	462	0	462	0	0	3
ENSMUSG00000101299.2	chr1	42261855	42304412	+	1734	60	52	71	77	70	75	28	44	48	Gm28175	ENSMUSG00000101299.2	2	ENSMUST00000189138.1,ENSMUST00000209336.1	1,7	398,1470	0,41085	398,561	0,12916	0,0	-1,-1
ENSMUSG00000100180.1	chr1	42324590	42355937	-	1271	0	0	0	0	0	3	0	0	0	Gm28140	ENSMUSG00000100180.1	1	ENSMUST00000190148.1	3	1268	30079	601	29487	0	5
ENSMUSG00000103106.1	chr1	42491813	42495663	+	533	6	3	6	2	0	0	0	7	9	Gm37047	ENSMUSG00000103106.1	1	ENSMUST00000191992.1	3	530	3320	194	1891	0	-1
ENSMUSG00000060424.14	chr1	42590782	42694842	-	4458	15810	17287	15768	17276	17047	17675	14496	15611	17900	Pantr1	ENSMUSG00000060424.14	12	ENSMUST00000181660.7,ENSMUST00000181725.7,ENSMUST00000176154.2,ENSMUST00000176977.7,ENSMUST00000181593.7,ENSMUST00000180689.7,ENSMUST00000188153.6,ENSMUST00000176052.7,ENSMUST00000186656.6,ENSMUST00000078844.7,ENSMUST00000185599.1,ENSMUST00000177136.2	4,3,3,2,4,4,3,3,5,3,3,2	2081,612,511,560,676,542,496,503,642,195,340,1541	101945,44323,18281,2919,44277,46083,46129,18968,44250,18339,27650,257	1756,263,257,304,256,256,256,255,255,78,151,1463	44243,25938,15100,2919,25938,27744,27744,18385,25938,15100,27393,257	0,0,0,0,0,0,0,0,0,0,0,0	6,5,5,4,6,6,5,5,7,5,5,4
ENSMUSG00000104199.1	chr1	42651726	42652401	+	676	0	0	0	0	0	0	0	0	0	4930420N18Rik	ENSMUSG00000104199.1	1	ENSMUST00000191831.1	1	675	0	675	0	0	-1
ENSMUSG00000093436.6	chr1	42694925	42744791	+	1712	195	201	242	195	165	168	185	168	208	Gm20646	ENSMUSG00000093436.6	2	ENSMUST00000199521.4,ENSMUST00000176807.2	2,2	658,1314	45385,48552	395,1051	45385,48552	0,0	-1,-1
ENSMUSG00000045515.3	chr1	42695768	42703176	+	7409	38805	49443	44366	47125	41262	43971	23535	25948	28271	Pou3f3	ENSMUSG00000045515.3	1	ENSMUST00000054883.3	1	7408	0	7408	0	1493	1
ENSMUSG00000097063.3	chr1	42707061	42713454	-	1257	496	448	295	531	344	445	199	164	204	Pantr2	ENSMUSG00000097063.3	2	ENSMUST00000180589.1,ENSMUST00000192894.1	4,1	459,980	5934,0	197,980	3785,0	0,0	6,3
ENSMUSG00000099784.1	chr1	42750712	42752881	+	2170	6	0	7	7	3	0	4	0	14	Dalir	ENSMUSG00000099784.1	1	ENSMUST00000188773.1	1	2169	0	2169	0	0	-1
ENSMUSG00000060679.14	chr1	42851233	42905683	+	5763	9885	12570	10402	9806	9581	9031	3194	3448	3401	Mrps9	ENSMUSG00000060679.14	7	ENSMUST00000057208.12,ENSMUST00000185376.6,ENSMUST00000185523.6,ENSMUST00000188174.6,ENSMUST00000187414.1,ENSMUST00000201108.3,ENSMUST00000202358.1	11,8,10,4,7,7,2	1407,2080,1857,2417,1135,1002,685	53042,46323,48880,28229,35479,16944,1941	277,1438,939,2035,688,278,407	17107,17107,17107,17107,17107,7564,1941	1162,0,0,0,0,384,0	1,-1,-1,-1,-1,-1,-1
ENSMUSG00000077448.1	chr1	42866685	42866818	-	134	0	0	0	0	0	0	0	0	0	Gm23126	ENSMUSG00000077448.1	1	ENSMUST00000104260.1	1	133	0	133	0	0	3
ENSMUSG00000041907.9	chr1	42952872	43035456	+	7238	1314	1694	1333	1647	1651	1575	781	900	988	Gpr45	ENSMUSG00000041907.9	5	ENSMUST00000188621.1,ENSMUST00000179766.2,ENSMUST00000179655.1,ENSMUST00000187998.1,ENSMUST00000114761.1	2,2,2,2,1	2044,3774,1728,497,1545	239,78719,75914,199,0	1683,3504,1634,458,1545	239,78719,75914,199,0	0,1121,0,0,1121	-1,2,-1,-1,1
ENSMUSG00000089088.1	chr1	43036845	43036929	+	85	0	0	0	0	0	0	0	0	0	Gm24001	ENSMUSG00000089088.1	1	ENSMUST00000158463.1	1	84	0	84	0	0	-1
ENSMUSG00000070939.9	chr1	43047200	43098637	-	10972	3147	3775	3425	3610	3289	3776	2645	3124	3507	Tgfbrap1	ENSMUSG00000070939.9	8	ENSMUST00000095014.7,ENSMUST00000186694.6,ENSMUST00000188598.1,ENSMUST00000188728.1,ENSMUST00000190427.6,ENSMUST00000187525.1,ENSMUST00000187872.1,ENSMUST00000189010.1	13,12,3,5,3,2,2,4	5594,5373,3157,826,694,1793,3255,781	45828,40136,3068,31730,26418,16429,20900,21967	2635,2615,2047,330,338,1711,1785,336	20900,16429,2343,20726,25197,16429,20900,19413	0,0,0,0,0,0,0,0	13,12,5,7,5,4,4,6
ENSMUSG00000100269.1	chr1	43056267	43057134	+	414	0	0	0	0	2	1	8	0	0	Gm28782	ENSMUSG00000100269.1	1	ENSMUST00000185980.1	2	412	455	249	455	0	-1
ENSMUSG00000041878.3	chr1	43092588	43093835	+	1248	49	115	18	88	45	58	84	88	80	8430432A02Rik	ENSMUSG00000041878.3	1	ENSMUST00000039080.3	1	1247	0	1247	0	0	-1
ENSMUSG00000010290.7	chr1	43098710	43115947	+	3458	9329	10159	8871	8718	9495	9993	7608	8226	9196	AI597479	ENSMUSG00000010290.7	1	ENSMUST00000010434.7	4	3454	13783	2761	10117	695	1
ENSMUSG00000008136.14	chr1	43123074	43196984	-	1897	412	629	556	391	414	659	266	365	522	Fhl2	ENSMUSG00000008136.14	3	ENSMUST00000008280.13,ENSMUST00000185893.1,ENSMUST00000187357.1	6,6,3	1557,1415,341	39330,72279,64656	591,375,174	11204,43397,54779	0,0,0	6,6,5
ENSMUSG00000094497.1	chr1	43189156	43189638	+	483	3	14	1	2	9	3	11	2	0	Gm8210	ENSMUSG00000094497.1	1	ENSMUST00000178557.1	1	482	0	482	0	0	-1
ENSMUSG00000099576.1	chr1	43250156	43302925	-	1188	0	0	0	0	0	0	1	0	0	Gm29040	ENSMUSG00000099576.1	1	ENSMUST00000189899.1	6	1182	51587	387	39068	0	8
ENSMUSG00000099694.1	chr1	43270683	43271135	+	453	0	0	0	1	0	0	0	0	0	Gm29610	ENSMUSG00000099694.1	1	ENSMUST00000187749.1	1	452	0	452	0	0	-1
ENSMUSG00000101923.1	chr1	43409584	43409963	+	380	0	1	0	0	0	0	0	2	0	Gm29041	ENSMUSG00000101923.1	1	ENSMUST00000189199.1	1	379	0	379	0	0	-1
ENSMUSG00000066877.11	chr1	43444579	43570515	+	4455	10159	12379	11840	11011	11385	11171	9347	9126	11436	Nck2	ENSMUSG00000066877.11	6	ENSMUST00000187435.6,ENSMUST00000136648.7,ENSMUST00000086421.8,ENSMUST00000124817.1,ENSMUST00000202540.1,ENSMUST00000114744.2	3,2,5,2,3,2	369,1513,2767,1419,575,418	88684,14930,121997,3530,21082,35355	162,1237,1367,1265,241,224	64915,14930,63594,3530,20068,35355	0,0,1140,0,0,231	3,-1,3,-1,2,-1
ENSMUSG00000103422.1	chr1	43488447	43490937	+	2491	19	14	13	20	18	12	11	19	28	Gm37536	ENSMUSG00000103422.1	1	ENSMUST00000194710.1	1	2490	0	2490	0	0	-1
ENSMUSG00000103945.1	chr1	43560273	43561565	+	1293	92	90	93	126	101	141	160	136	169	Gm38228	ENSMUSG00000103945.1	1	ENSMUST00000193169.1	1	1292	0	1292	0	0	-1
ENSMUSG00000026051.8	chr1	43730602	43742578	+	902	343	420	632	407	543	521	445	329	518	1500015O10Rik	ENSMUSG00000026051.8	1	ENSMUST00000027217.8	4	898	11078	361	6237	443	1
ENSMUSG00000100764.1	chr1	43741961	43743895	-	458	21	17	9	32	30	17	9	4	20	Gm29155	ENSMUSG00000100764.1	2	ENSMUST00000186289.1,ENSMUST00000185910.1	2,1	214,268	1720,0	145,268	1720,0	0,0	4,3
ENSMUSG00000100635.1	chr1	43742915	43743526	+	612	11	0	17	2	9	2	2	3	3	Gm29157	ENSMUSG00000100635.1	1	ENSMUST00000188753.1	1	611	0	611	0	0	-1
ENSMUSG00000100480.1	chr1	43745784	43746282	-	499	21	9	8	13	15	12	9	11	9	Gm29156	ENSMUSG00000100480.1	1	ENSMUST00000187764.1	1	498	0	498	0	0	3
ENSMUSG00000057363.12	chr1	43746966	43827800	-	5097	2748	3263	2735	2758	2916	3113	2044	2432	2437	Uxs1	ENSMUSG00000057363.12	8	ENSMUST00000126008.7,ENSMUST00000076997.12,ENSMUST00000139451.7,ENSMUST00000136179.7,ENSMUST00000153317.5,ENSMUST00000134860.7,ENSMUST00000136704.1,ENSMUST00000128261.1	15,15,10,9,4,7,7,7	4605,1906,844,887,370,348,464,442	76229,76323,61949,54399,55650,52548,47180,36701	3396,850,185,279,135,104,147,159	20238,20238,20238,19360,47446,20329,17076,20238	0,0,0,0,0,0,0,0	15,6,12,11,6,9,2,9
ENSMUSG00000090243.1	chr1	43785910	43787188	+	1279	1	0	0	0	0	0	5	0	0	Gm16103	ENSMUSG00000090243.1	1	ENSMUST00000163003.1	1	1278	0	1278	0	0	-1
ENSMUSG00000100701.1	chr1	43888051	43888595	+	545	10	8	5	9	4	3	7	6	13	Gm19587	ENSMUSG00000100701.1	1	ENSMUST00000191395.1	1	544	0	544	0	0	-1
ENSMUSG00000101395.1	chr1	43898294	43899109	+	816	0	0	0	0	0	0	1	0	1	Gm8241	ENSMUSG00000101395.1	1	ENSMUST00000189286.1	1	815	0	815	0	0	-1
ENSMUSG00000088848.1	chr1	43902928	43903052	+	125	0	0	0	0	0	0	0	0	0	Gm26352	ENSMUSG00000088848.1	1	ENSMUST00000158223.1	1	124	0	124	0	0	-1
ENSMUSG00000095757.1	chr1	43918777	43918886	-	110	0	0	0	0	0	2	5	0	0	Gm24180	ENSMUSG00000095757.1	1	ENSMUST00000179961.1	1	109	0	109	0	0	3
ENSMUSG00000041763.14	chr1	43933647	44003000	+	10078	16585	20294	16093	16995	18133	20330	15144	18460	18839	Tpp2	ENSMUSG00000041763.14	10	ENSMUST00000185579.6,ENSMUST00000087933.9,ENSMUST00000190401.6,ENSMUST00000186028.1,ENSMUST00000188313.6,ENSMUST00000188302.6,ENSMUST00000189388.6,ENSMUST00000186441.1,ENSMUST00000190207.1,ENSMUST00000187115.1	3,30,6,7,29,24,24,6,8,2	447,4619,4988,1382,4602,3051,2880,685,2412,845	15311,64345,17999,21604,64383,53519,53659,5297,17303,666	226,867,2274,530,896,244,208,168,1681,613	9074,9074,9074,9074,9074,9074,9074,1896,7234,666	0,3759,0,0,3721,1809,2630,0,889,0	-1,1,-1,-1,1,1,1,-1,-1,-1
ENSMUSG00000047343.4	chr1	44009408	44020034	-	4300	70	86	56	71	42	97	25	30	64	Mettl21c	ENSMUSG00000047343.4	3	ENSMUST00000061421.3,ENSMUST00000162750.1,ENSMUST00000159881.1	5,4,3	1081,589,3479	9517,6944,6045	625,282,3263	3413,3413,3413	0,0,0	5,6,5
ENSMUSG00000090106.1	chr1	44018470	44018649	-	180	0	0	0	0	0	0	0	0	1	Gm15838	ENSMUSG00000090106.1	1	ENSMUST00000161575.1	1	179	0	179	0	0	3
ENSMUSG00000091844.1	chr1	44055952	44061936	-	5985	35	29	23	37	28	9	20	27	60	Gm8251	ENSMUSG00000091844.1	1	ENSMUST00000168641.1	1	5984	0	5984	0	2	1
ENSMUSG00000026049.11	chr1	44086613	44102441	-	1926	5614	6079	4755	5058	5805	5322	4161	4558	4243	Tex30	ENSMUSG00000026049.11	13	ENSMUST00000027215.11,ENSMUST00000156392.7,ENSMUST00000128190.7,ENSMUST00000147571.7,ENSMUST00000133677.7,ENSMUST00000150911.7,ENSMUST00000152239.7,ENSMUST00000129702.1,ENSMUST00000147661.7,ENSMUST00000127923.7,ENSMUST00000143327.1,ENSMUST00000149502.7,ENSMUST00000125540.1	8,6,6,6,7,6,6,4,5,4,5,4,4	1264,1116,1269,1354,928,954,1040,395,481,425,547,445,419	14514,14706,14264,14198,14635,14626,13765,15009,14019,13571,13365,13484,11062	450,447,443,462,230,230,230,205,153,230,230,230,230	8257,8257,8257,8257,8257,8257,8257,13801,11321,10309,6531,8257,8257	0,0,0,0,0,0,0,0,0,0,0,0,0	8,6,6,6,7,6,6,6,7,6,7,6,6
ENSMUSG00000101104.6	chr1	44091463	44110790	-	676	2184	2220	1871	1816	2204	2149	1981	2004	2061	Gm29247	ENSMUSG00000101104.6	2	ENSMUST00000148542.7,ENSMUST00000134195.2	6,6	565,515	18017,18711	153,153	7030,8257	0,0	8,8
ENSMUSG00000026047.13	chr1	44106546	44118808	-	3199	4176	5055	3946	3762	4337	4471	4260	4509	5215	Kdelc1	ENSMUSG00000026047.13	5	ENSMUST00000065767.8,ENSMUST00000141125.7,ENSMUST00000027213.13,ENSMUST00000149665.1,ENSMUST00000152643.1	10,9,9,5,4	2349,2076,1756,2026,860	9913,9792,10122,4656,3057	558,530,447,1092,383	2139,2139,2562,2139,1256	0,0,0,0,0	10,11,9,7,3
ENSMUSG00000041684.11	chr1	44118957	44144770	+	4206	10554	12802	10774	10538	11860	11274	10556	11111	12782	Bivm	ENSMUSG00000041684.11	6	ENSMUST00000155917.7,ENSMUST00000138521.7,ENSMUST00000035991.7,ENSMUST00000186280.1,ENSMUST00000114709.2,ENSMUST00000129068.1	3,3,11,3,10,2	638,338,3302,402,3560,359	6971,6991,22046,6437,21242,6069	300,175,1661,221,1921,295	5992,5992,7307,5992,7307,6069	0,0,1500,0,1500,0	3,-1,3,-1,2,2
ENSMUSG00000026048.16	chr1	44147744	44181260	+	5864	8834	11160	10111	9668	8934	10202	7885	8328	10688	Ercc5	ENSMUSG00000026048.16	7	ENSMUST00000188376.1,ENSMUST00000027214.3,ENSMUST00000131177.7,ENSMUST00000139510.7,ENSMUST00000145406.1,ENSMUST00000137380.7,ENSMUST00000155862.1	1,15,14,6,3,7,5	1778,3892,4225,526,491,1053,951	0,29521,29188,13409,9832,9010,7436	1778,1073,1073,175,205,207,408	0,8787,8787,8972,8800,2725,2725	0,3498,0,0,0,0,0	-1,1,-1,-1,-1,-1,-1
ENSMUSG00000046828.3	chr1	44204070	44218961	-	3961	0	0	1	0	0	18	0	0	3	Mettl21e	ENSMUSG00000046828.3	2	ENSMUST00000054801.3,ENSMUST00000150062.1	5,4	3206,1554	11685,10934	2683,1034	6913,6913	0,0	5,6
ENSMUSG00000089703.1	chr1	44212162	44213118	+	957	0	0	0	0	0	1	0	0	1	Gm15833	ENSMUSG00000089703.1	1	ENSMUST00000161563.1	1	956	0	956	0	0	-1
ENSMUSG00000100966.1	chr1	44330048	44331036	-	989	0	0	0	1	0	0	0	0	0	Gm5700	ENSMUSG00000100966.1	1	ENSMUST00000191483.1	1	988	0	988	0	0	3
ENSMUSG00000100769.1	chr1	44392809	44394447	+	1108	0	0	0	0	0	0	0	0	0	Gm28893	ENSMUSG00000100769.1	1	ENSMUST00000190951.1	3	1105	533	879	273	0	-1
ENSMUSG00000101567.1	chr1	44463923	44464231	-	309	9	2	3	11	8	6	7	4	3	Txn-ps1	ENSMUSG00000101567.1	1	ENSMUST00000186385.1	1	308	0	308	0	0	3
ENSMUSG00000056870.9	chr1	44551511	44796838	+	3758	3686	4826	3522	3329	3688	4761	1864	2320	1950	Gulp1	ENSMUSG00000056870.9	6	ENSMUST00000074525.9,ENSMUST00000160854.7,ENSMUST00000159555.7,ENSMUST00000161793.1,ENSMUST00000161066.7,ENSMUST00000162600.1	11,10,10,6,4,12	3127,1389,2872,533,337,2786	242200,235792,242261,236235,155698,104895	1888,426,1876,145,145,1875	137272,137272,137272,137272,135837,35796	905,921,123,0,0,888	2,2,2,-1,3,1
ENSMUSG00000102319.1	chr1	44560885	44565447	+	4563	106	200	97	161	117	197	130	162	164	Gm37626	ENSMUSG00000102319.1	1	ENSMUST00000194332.1	1	4562	0	4562	0	0	-1
ENSMUSG00000089877.1	chr1	44644279	44644698	+	420	2	12	3	0	7	12	0	8	0	Gm16102	ENSMUSG00000089877.1	1	ENSMUST00000160955.1	1	419	0	419	0	0	-1
ENSMUSG00000101701.1	chr1	44739676	44744949	-	905	0	0	0	0	0	0	0	0	4	4930521E06Rik	ENSMUSG00000101701.1	1	ENSMUST00000186732.1	3	902	4371	805	3675	0	5
ENSMUSG00000103071.1	chr1	44756942	44758492	+	1551	0	0	3	0	0	6	0	0	0	Gm38110	ENSMUSG00000103071.1	1	ENSMUST00000194594.1	1	1550	0	1550	0	0	-1
ENSMUSG00000100434.1	chr1	44839171	44839698	+	528	0	0	0	0	0	2	0	1	0	Gm3489	ENSMUSG00000100434.1	1	ENSMUST00000190083.1	1	527	0	527	0	0	-1
ENSMUSG00000100013.1	chr1	44873486	44874152	-	667	0	0	0	0	0	0	0	0	0	Gm19480	ENSMUSG00000100013.1	1	ENSMUST00000185547.1	1	666	0	666	0	0	3
ENSMUSG00000101251.1	chr1	44924149	44924893	-	745	0	0	0	0	0	0	0	0	0	Gm3496	ENSMUSG00000101251.1	1	ENSMUST00000188283.1	1	744	0	744	0	0	3
ENSMUSG00000101937.1	chr1	45178067	45179006	+	940	0	1	0	0	0	0	0	3	0	Gm5268	ENSMUSG00000101937.1	1	ENSMUST00000189212.1	1	939	0	939	0	0	-1
ENSMUSG00000026043.18	chr1	45311538	45349706	+	9816	73097	120556	108779	83393	82070	104954	74792	104512	115158	Col3a1	ENSMUSG00000026043.18	7	ENSMUST00000129611.1,ENSMUST00000087883.12,ENSMUST00000189818.1,ENSMUST00000123204.1,ENSMUST00000190943.1,ENSMUST00000185687.1,ENSMUST00000186021.1	4,51,2,3,7,10,6	3155,5513,1608,567,424,573,731	10325,32655,3748,738,2673,4335,7077	2612,1105,1423,461,112,107,294	9665,9665,3748,570,879,879,4707	0,4344,0,0,0,0,0	-1,1,-1,-1,-1,-1,-1
ENSMUSG00000105211.1	chr1	45311673	45311813	+	141	1567	2448	2075	1573	1872	2109	1631	2407	2313	AC125167.1	ENSMUSG00000105211.1	1	ENSMUST00000198698.1	1	140	0	140	0	0	-1
ENSMUSG00000026042.16	chr1	45374321	45503282	-	9591	16683	26125	25860	18784	16046	24220	17983	21800	28592	Col5a2	ENSMUSG00000026042.16	4	ENSMUST00000086430.4,ENSMUST00000150143.1,ENSMUST00000134681.7,ENSMUST00000131535.1	54,6,16,5	6571,2945,1954,351	122390,1658,87129,4586	1909,2098,602,167	59953,533,59953,2669	0,0,0,0	54,8,18,7
ENSMUSG00000104476.1	chr1	45485836	45493052	-	7217	71	112	51	52	60	97	50	88	76	Gm38211	ENSMUSG00000104476.1	1	ENSMUST00000192814.1	1	7216	0	7216	0	0	3
ENSMUSG00000100218.1	chr1	45513532	45514055	-	524	1	0	0	0	0	0	0	1	0	Gm8296	ENSMUSG00000100218.1	1	ENSMUST00000185597.1	1	523	0	523	0	0	3
ENSMUSG00000100361.1	chr1	45519774	45520754	-	981	6	6	0	2	1	4	1	3	0	Gm7063	ENSMUSG00000100361.1	1	ENSMUST00000186840.1	1	980	0	980	0	0	3
ENSMUSG00000100894.1	chr1	45602026	45602753	+	584	0	0	0	1	0	0	0	0	0	Gm8304	ENSMUSG00000100894.1	1	ENSMUST00000185744.1	2	582	145	301	145	0	-1
ENSMUSG00000095121.1	chr1	45685456	45685562	-	107	0	0	0	0	0	0	0	0	0	Gm23216	ENSMUSG00000095121.1	1	ENSMUST00000179545.1	1	106	0	106	0	0	3
ENSMUSG00000065255.1	chr1	45746895	45747025	+	131	2	0	0	0	0	0	0	0	0	Gm23974	ENSMUSG00000065255.1	1	ENSMUST00000083321.1	1	130	0	130	0	0	-1
ENSMUSG00000100843.1	chr1	45768337	45769486	+	1150	6	8	3	3	0	1	5	0	5	Gm8307	ENSMUSG00000100843.1	1	ENSMUST00000187682.1	1	1149	0	1149	0	0	-1
ENSMUSG00000087764.1	chr1	45772962	45773164	+	203	0	0	0	0	0	0	0	0	0	Gm23984	ENSMUSG00000087764.1	1	ENSMUST00000157139.1	1	202	0	202	0	0	-1
ENSMUSG00000025995.16	chr1	45795166	45823619	+	4900	11281	13706	10978	11485	11865	12364	11483	12795	13484	Wdr75	ENSMUSG00000025995.16	9	ENSMUST00000027139.14,ENSMUST00000154436.7,ENSMUST00000142145.1,ENSMUST00000147308.1,ENSMUST00000143737.7,ENSMUST00000146602.1,ENSMUST00000135662.7,ENSMUST00000186308.1,ENSMUST00000186651.1	21,20,4,5,15,2,9,3,3	2932,3206,611,463,1930,385,2067,625,409	25521,24949,6241,7959,19596,1376,6874,623,649	438,836,316,129,207,315,1001,329,282	4282,4282,3412,3412,6253,1376,2258,334,360	2472,0,0,0,0,0,0,0,151	1,-1,-1,1,-1,-1,-1,-1,-1
ENSMUSG00000099850.1	chr1	45833800	45836788	-	1779	0	0	0	0	0	0	0	0	0	Gm28906	ENSMUSG00000099850.1	1	ENSMUST00000191371.1	2	1777	1211	1440	1211	0	4
ENSMUSG00000084817.3	chr1	45857332	45857754	-	423	30	45	26	45	34	39	41	38	40	Gm5526	ENSMUSG00000084817.3	1	ENSMUST00000153604.1	1	422	0	422	0	0	3
ENSMUSG00000098549.1	chr1	45889525	45890273	-	749	6	0	0	3	2	3	8	0	0	Gm5269	ENSMUSG00000098549.1	2	ENSMUST00000184038.1,ENSMUST00000183590.1	1,1	748,137	0,0	748,137	0,0	0,-133	3,1
ENSMUSG00000099381.1	chr1	45905623	45906798	+	1176	0	0	0	0	0	0	0	0	0	Gm18303	ENSMUSG00000099381.1	1	ENSMUST00000190055.1	1	1175	0	1175	0	0	-1
ENSMUSG00000025993.10	chr1	45908068	45926523	-	9000	2789	3536	3271	2874	3360	3456	3075	3288	3770	Slc40a1	ENSMUSG00000025993.10	8	ENSMUST00000027137.10,ENSMUST00000191247.6,ENSMUST00000188252.6,ENSMUST00000186822.1,ENSMUST00000187420.6,ENSMUST00000187406.6,ENSMUST00000186804.1,ENSMUST00000186755.1	8,5,3,4,4,4,4,1	3362,3923,260,501,447,366,404,2791	14152,6445,4121,5825,4855,4936,4898,0	1651,3194,159,234,187,106,144,2791	5828,3402,2156,3402,3402,3402,3402,0	0,0,0,0,0,0,0,0	8,7,5,6,6,6,6,3
ENSMUSG00000099946.1	chr1	45971182	45976975	+	1601	1	0	0	0	0	0	0	0	0	Gm9496	ENSMUSG00000099946.1	1	ENSMUST00000191295.1	2	1599	4194	1405	4194	0	-1
ENSMUSG00000070896.2	chr1	45981548	45982012	+	465	2	1	0	0	0	5	4	0	5	Rpl23a-ps1	ENSMUSG00000070896.2	1	ENSMUST00000085632.3	1	464	0	464	0	0	-1
ENSMUSG00000090682.4	chr1	46011757	46012020	-	264	0	0	0	0	0	1	0	0	0	Gm3852	ENSMUSG00000090682.4	1	ENSMUST00000182781.1	1	263	0	263	0	0	3
ENSMUSG00000044457.8	chr1	46020072	46030469	-	4667	0	2	0	0	0	0	0	0	0	Stk-ps2	ENSMUSG00000044457.8	4	ENSMUST00000051224.7,ENSMUST00000171707.7,ENSMUST00000167676.1,ENSMUST00000187808.1	5,4,3,1	4662,3479,3360,615	5735,6543,6662,0	1875,1639,1639,615	2957,2957,3705,0	0,0,0,0	7,6,5,3
ENSMUSG00000099432.1	chr1	46056310	46058986	+	560	0	0	0	0	0	0	0	0	0	Gm18849	ENSMUSG00000099432.1	1	ENSMUST00000189861.1	3	557	2119	244	1865	0	-1
ENSMUSG00000041144.10	chr1	46066315	46373546	+	19980	833	801	745	706	711	684	606	711	799	Dnah7b	ENSMUSG00000041144.10	6	ENSMUST00000188209.1,ENSMUST00000069293.8,ENSMUST00000190792.1,ENSMUST00000187548.1,ENSMUST00000185557.1,ENSMUST00000185879.1	2,66,2,7,4,4	629,12248,3463,5363,528,736	436,294560,30557,30579,3587,16184	584,872,3430,2585,176,307	436,33123,30557,15072,2281,10227	0,12141,0,0,0,73	-1,1,-1,-1,-1,-1
ENSMUSG00000096047.1	chr1	46374197	46374315	+	119	0	0	0	0	0	0	0	0	0	n-R5s211	ENSMUSG00000096047.1	1	ENSMUST00000093689.1	1	118	0	118	0	0	-1
ENSMUSG00000101262.1	chr1	46414502	46416932	+	1953	34	16	11	36	34	38	32	37	12	Gm8326	ENSMUSG00000101262.1	1	ENSMUST00000188705.1	2	1951	479	1652	479	0	-1
ENSMUSG00000101337.6	chr1	46425592	46807476	+	12603	130	152	153	116	107	137	88	158	170	Dnah7c	ENSMUSG00000101337.6	5	ENSMUST00000189749.6,ENSMUST00000178395.1,ENSMUST00000189339.6,ENSMUST00000191499.1,ENSMUST00000187094.1	65,5,4,3,4	12142,607,668,387,827	369742,16543,9537,8808,4846	872,176,218,216,355	59697,10539,7291,6723,2894	12010,0,0,0,0	1,-1,-1,-1,-1
ENSMUSG00000025986.6	chr1	46807544	46892852	-	6095	23905	27310	24199	22264	24054	26024	26294	27589	30190	Slc39a10	ENSMUSG00000025986.6	4	ENSMUST00000027131.5,ENSMUST00000141226.2,ENSMUST00000186852.1,ENSMUST00000185520.1	10,7,2,2	5488,2365,563,495	41014,15932,56649,51837	2567,772,511,413	17320,5450,56649,51837	0,0,0,0	10,9,4,4
ENSMUSG00000100213.1	chr1	46849529	46850479	-	951	142	195	135	177	147	205	226	266	205	Gm28151	ENSMUSG00000100213.1	1	ENSMUST00000189404.1	1	950	0	950	0	0	3
ENSMUSG00000103129.1	chr1	46877203	46881072	-	3870	6	5	1	26	8	3	1	5	6	Gm37393	ENSMUSG00000103129.1	1	ENSMUST00000195118.1	1	3869	0	3869	0	0	3
ENSMUSG00000100160.1	chr1	46896583	46896879	-	297	0	0	0	0	0	0	0	0	0	Gm28527	ENSMUSG00000100160.1	1	ENSMUST00000185210.1	1	296	0	296	0	0	3
ENSMUSG00000101921.1	chr1	47067788	47068025	+	238	0	0	0	0	0	0	0	0	0	Gm28825	ENSMUSG00000101921.1	1	ENSMUST00000186233.1	1	237	0	237	0	0	-1
ENSMUSG00000101447.1	chr1	47153461	47189071	+	488	0	0	0	0	0	0	0	0	1	Gm28826	ENSMUSG00000101447.1	1	ENSMUST00000190006.1	3	485	35125	306	33452	0	-1
ENSMUSG00000081185.1	chr1	47365644	47366372	-	729	10	23	3	5	13	20	5	5	21	Gm4852	ENSMUSG00000081185.1	1	ENSMUST00000121202.1	1	728	0	728	0	0	3
ENSMUSG00000103246.1	chr1	47433824	47435765	-	1942	0	0	0	0	0	0	0	0	0	Gm38090	ENSMUSG00000103246.1	1	ENSMUST00000195733.1	1	1941	0	1941	0	0	3
ENSMUSG00000098876.1	chr1	47467021	47467125	-	105	0	0	0	0	0	0	0	0	0	Mir6350	ENSMUSG00000098876.1	1	ENSMUST00000183639.1	1	104	0	104	0	0	3
ENSMUSG00000100530.1	chr1	47478868	47480198	+	742	0	0	0	0	0	0	0	0	0	Gm18117	ENSMUSG00000100530.1	1	ENSMUST00000187720.1	2	740	590	681	590	0	-1
ENSMUSG00000104067.1	chr1	47605996	47606901	+	906	0	6	0	0	0	2	1	0	0	Gm37196	ENSMUSG00000104067.1	1	ENSMUST00000194762.1	1	905	0	905	0	0	-1
ENSMUSG00000100033.1	chr1	47657693	47659630	+	1938	40	54	44	86	53	77	38	85	75	Gm8337	ENSMUSG00000100033.1	1	ENSMUST00000187358.1	1	1937	0	1937	0	0	-1
ENSMUSG00000094968.1	chr1	47749279	47749399	-	121	0	0	0	0	0	0	0	0	0	Gm22419	ENSMUSG00000094968.1	1	ENSMUST00000178780.1	1	120	0	120	0	0	3
ENSMUSG00000088017.1	chr1	47751299	47751568	-	270	0	0	0	0	0	0	0	0	0	Gm23829	ENSMUSG00000088017.1	1	ENSMUST00000157392.1	1	269	0	269	0	0	3
ENSMUSG00000101996.1	chr1	47914989	47915815	-	827	0	0	0	0	0	0	0	0	0	Gm19206	ENSMUSG00000101996.1	1	ENSMUST00000186401.1	1	826	0	826	0	0	3
ENSMUSG00000096973.1	chr1	48313866	48314851	-	986	2	1	1	2	0	0	1	0	0	Gm5974	ENSMUSG00000096973.1	1	ENSMUST00000181607.1	1	985	0	985	0	0	3
ENSMUSG00000064943.1	chr1	48462173	48462293	-	121	8	2	7	4	0	2	0	2	2	Gm23240	ENSMUSG00000064943.1	1	ENSMUST00000083009.1	1	120	0	120	0	0	3
ENSMUSG00000100866.1	chr1	48527639	48527851	+	213	0	0	0	0	0	0	0	0	0	Gm28830	ENSMUSG00000100866.1	1	ENSMUST00000188192.1	1	212	0	212	0	0	-1
ENSMUSG00000101721.1	chr1	48731579	48733090	-	1373	0	0	0	0	0	0	0	0	0	Gm8354	ENSMUSG00000101721.1	1	ENSMUST00000189223.1	2	1371	140	1284	140	0	4
ENSMUSG00000099376.1	chr1	48783663	48784593	+	832	0	0	0	0	0	0	0	0	0	Gm19124	ENSMUSG00000099376.1	1	ENSMUST00000191041.1	2	830	100	694	100	0	-1
ENSMUSG00000097883.1	chr1	48881713	48882723	+	1011	2	6	1	3	4	2	4	1	5	Gm8357	ENSMUSG00000097883.1	1	ENSMUST00000181115.1	1	1010	0	1010	0	0	-1
ENSMUSG00000092790.1	chr1	49095444	49095885	+	442	0	0	0	0	0	0	0	0	0	Gm22693	ENSMUSG00000092790.1	1	ENSMUST00000175049.1	1	441	0	441	0	0	-1
ENSMUSG00000099698.1	chr1	49173160	49173374	-	215	0	0	0	0	0	0	0	0	0	Gm28740	ENSMUSG00000099698.1	1	ENSMUST00000186142.1	1	214	0	214	0	0	3
ENSMUSG00000099454.1	chr1	49236252	49237244	+	887	0	0	0	0	0	0	0	0	0	Gm8367	ENSMUSG00000099454.1	1	ENSMUST00000186145.1	2	885	107	785	107	0	-1
ENSMUSG00000051616.14	chr1	49244616	49340443	+	582	0	0	0	0	0	0	0	0	0	C230029F24Rik	ENSMUSG00000051616.14	2	ENSMUST00000056879.8,ENSMUST00000188673.6	4,5	524,549	93106,95278	164,149	66092,66092	0,0	-1,-1
ENSMUSG00000099627.1	chr1	49399024	49400729	-	1706	0	0	0	0	0	0	0	0	0	Gm6757	ENSMUSG00000099627.1	1	ENSMUST00000189810.1	1	1705	0	1705	0	0	3
ENSMUSG00000099577.1	chr1	49498553	49498992	+	440	0	0	0	0	0	0	0	0	0	Gm3605	ENSMUSG00000099577.1	1	ENSMUST00000185858.1	1	439	0	439	0	0	-1
ENSMUSG00000099882.1	chr1	49579150	49579586	-	437	0	0	0	0	0	0	0	0	0	Gm28388	ENSMUSG00000099882.1	1	ENSMUST00000186262.1	1	436	0	436	0	0	3
ENSMUSG00000101760.1	chr1	50056782	50058490	+	704	0	0	1	0	0	0	0	0	0	Gm8384	ENSMUSG00000101760.1	1	ENSMUST00000190905.1	2	702	1006	381	1006	0	-1
ENSMUSG00000099608.1	chr1	50107470	50108962	+	1493	0	0	0	0	0	0	0	0	1	4933411E06Rik	ENSMUSG00000099608.1	1	ENSMUST00000186016.1	1	1492	0	1492	0	0	-1
ENSMUSG00000099864.1	chr1	50177566	50178291	-	726	0	0	0	0	0	0	0	0	0	Gm8391	ENSMUSG00000099864.1	1	ENSMUST00000185632.1	1	725	0	725	0	0	3
ENSMUSG00000098249.1	chr1	50222389	50222520	-	132	0	0	0	0	0	0	0	0	0	Gm27330	ENSMUSG00000098249.1	1	ENSMUST00000184689.1	1	131	0	131	0	0	3
ENSMUSG00000100451.1	chr1	50397552	50398079	-	528	0	0	0	0	0	0	0	0	0	Gm29665	ENSMUSG00000100451.1	1	ENSMUST00000191457.1	1	527	0	527	0	0	3
ENSMUSG00000099941.1	chr1	50533030	50533191	+	162	0	0	0	0	0	0	0	0	0	Gm20118	ENSMUSG00000099941.1	1	ENSMUST00000187207.1	1	161	0	161	0	0	-1
ENSMUSG00000084531.1	chr1	50559762	50560075	+	314	0	0	0	0	0	0	0	0	0	Gm25843	ENSMUSG00000084531.1	1	ENSMUST00000122582.1	1	313	0	313	0	0	-1
ENSMUSG00000100816.1	chr1	50815375	50817701	+	2327	0	0	0	1	0	0	0	0	0	Gm28321	ENSMUSG00000100816.1	1	ENSMUST00000187677.1	1	2326	0	2326	0	0	-1
ENSMUSG00000026109.14	chr1	50900647	51187270	+	6707	639	506	397	383	507	462	273	225	461	Tmeff2	ENSMUSG00000026109.14	4	ENSMUST00000186103.6,ENSMUST00000139157.7,ENSMUST00000114565.7,ENSMUST00000081851.3	2,4,10,10	1272,411,2708,3333	12006,14372,67250,256418	1137,135,926,1885	12006,12006,36077,128245	0,0,784,1115	-1,-1,6,1
ENSMUSG00000100671.1	chr1	50904444	50905918	+	1475	0	0	0	0	0	0	0	0	0	Gm28322	ENSMUSG00000100671.1	1	ENSMUST00000185627.1	1	1474	0	1474	0	0	-1
ENSMUSG00000092906.1	chr1	51015313	51015413	+	101	0	0	0	0	0	1	7	0	1	Gm25736	ENSMUSG00000092906.1	1	ENSMUST00000175165.1	1	100	0	100	0	0	-1
ENSMUSG00000101242.1	chr1	51138281	51141222	-	226	0	0	0	0	0	0	2	1	0	Gm28319	ENSMUSG00000101242.1	1	ENSMUST00000189560.1	2	224	2717	126	2717	0	4
ENSMUSG00000099924.1	chr1	51148309	51150581	+	2273	13	6	13	16	12	21	3	7	10	Gm28320	ENSMUSG00000099924.1	1	ENSMUST00000187777.1	1	2272	0	2272	0	0	-1
ENSMUSG00000099625.1	chr1	51195221	51197748	+	2528	4	2	0	2	0	9	0	3	0	Gm29325	ENSMUSG00000099625.1	1	ENSMUST00000190705.1	1	2527	0	2527	0	0	-1
ENSMUSG00000101799.1	chr1	51218386	51333779	-	2552	0	2	1	0	0	2	2	6	13	9330175M20Rik	ENSMUSG00000101799.1	1	ENSMUST00000189867.1	5	2547	112846	2054	68358	0	7
ENSMUSG00000045954.7	chr1	51289126	51302960	+	3055	857	1652	1233	1068	1040	1268	1327	1111	1345	Sdpr	ENSMUSG00000045954.7	1	ENSMUST00000051572.7	2	3053	10781	2311	10781	1255	1
ENSMUSG00000099741.1	chr1	51317528	51318552	-	1025	1	1	0	0	0	1	0	4	0	Gm5253	ENSMUSG00000099741.1	1	ENSMUST00000187104.1	1	1024	0	1024	0	0	3
ENSMUSG00000101702.1	chr1	51457932	51458931	-	548	0	0	0	0	0	0	0	0	0	1700072G22Rik	ENSMUSG00000101702.1	1	ENSMUST00000189460.1	2	546	453	392	453	0	4
ENSMUSG00000026107.11	chr1	51465862	51478425	-	8498	1066	1261	933	1070	1117	1137	1272	1058	1290	Nabp1	ENSMUSG00000026107.11	10	ENSMUST00000189542.6,ENSMUST00000186003.6,ENSMUST00000190103.6,ENSMUST00000027279.11,ENSMUST00000186684.6,ENSMUST00000188204.6,ENSMUST00000188051.6,ENSMUST00000185534.1,ENSMUST00000185961.1,ENSMUST00000188303.1	8,7,7,6,5,6,6,6,3,1	4782,4411,2896,2832,2672,966,674,702,513,2807	7755,7649,6813,6079,5870,6626,6622,6555,1544,0	3224,3079,1591,1923,1554,604,282,269,390,2807	2873,2873,2873,2873,2873,2873,2873,2873,918,0	0,0,0,0,0,0,0,0,0,0	6,5,6,6,5,6,6,6,5,3
ENSMUSG00000099413.1	chr1	51507086	51596718	-	3979	5	1	6	4	0	2	7	0	22	Gm17767	ENSMUSG00000099413.1	2	ENSMUST00000190169.1,ENSMUST00000189410.1	2,4	3047,1466	2196,85747	2958,539	2196,72316	0,0	4,6
ENSMUSG00000103424.1	chr1	51527005	51529369	-	2365	0	0	0	0	0	0	0	0	0	Gm37535	ENSMUSG00000103424.1	1	ENSMUST00000194442.1	1	2364	0	2364	0	0	3
ENSMUSG00000101741.1	chr1	51696324	51746943	-	1420	5	2	4	3	1	11	7	3	7	Gm28055	ENSMUSG00000101741.1	2	ENSMUST00000189576.1,ENSMUST00000186769.1	2,2	1299,570	277,49248	1253,452	277,49248	0,0	4,4
ENSMUSG00000018417.14	chr1	51749765	51916071	-	10792	43211	55269	45007	45419	43641	47834	37130	47055	49552	Myo1b	ENSMUSG00000018417.14	15	ENSMUST00000046390.13,ENSMUST00000114537.8,ENSMUST00000114541.7,ENSMUST00000018561.13,ENSMUST00000145367.1,ENSMUST00000140731.7,ENSMUST00000140930.1,ENSMUST00000136273.1,ENSMUST00000136701.1,ENSMUST00000126952.1,ENSMUST00000144694.1,ENSMUST00000135125.7,ENSMUST00000151525.7,ENSMUST00000123299.1,ENSMUST00000126657.1	30,29,29,31,3,5,3,6,8,2,10,5,7,3,4	5022,4589,4587,4736,762,443,680,660,961,280,1234,349,3038,277,1554	161284,161370,152740,161198,3355,7914,4122,8900,17871,2209,97664,20661,102193,16365,51722	1531,1314,1307,1302,580,104,570,232,226,234,336,99,2385,120,789	32535,32535,28776,32535,2091,2858,2858,2379,9099,2209,28776,11721,32535,15772,28026	0,0,0,0,0,0,0,0,0,0,0,0,0,0,0	30,29,29,31,5,7,5,8,10,4,12,7,9,5,6
ENSMUSG00000101724.1	chr1	51847840	51849118	-	1279	77	78	43	104	64	78	113	144	150	Gm29453	ENSMUSG00000101724.1	1	ENSMUST00000186428.1	1	1278	0	1278	0	0	3
ENSMUSG00000100313.1	chr1	51877110	51879608	-	2499	77	60	49	63	69	68	42	36	51	Gm28323	ENSMUSG00000100313.1	1	ENSMUST00000186817.1	1	2498	0	2498	0	0	3
ENSMUSG00000100696.1	chr1	51938254	51938665	-	412	10	7	2	3	4	1	6	8	4	Gm8419	ENSMUSG00000100696.1	1	ENSMUST00000189886.1	1	411	0	411	0	0	3
ENSMUSG00000099135.1	chr1	51938974	51939095	-	122	0	0	0	0	0	0	0	0	0	Gm27607	ENSMUSG00000099135.1	1	ENSMUST00000185162.1	1	121	0	121	0	0	3
ENSMUSG00000072324.4	chr1	51940664	51941261	-	598	2	9	0	4	0	0	72	2	0	Gm8420	ENSMUSG00000072324.4	1	ENSMUST00000097103.4	1	597	0	597	0	0	3
ENSMUSG00000062939.11	chr1	51987148	52107189	+	3872	1088	1643	1094	963	896	1300	431	589	496	Stat4	ENSMUSG00000062939.11	4	ENSMUST00000168302.7,ENSMUST00000027277.6,ENSMUST00000187053.1,ENSMUST00000187554.1	25,24,5,2	2637,2958,1019,605	117404,95983,62799,1134	279,485,583,327	51381,51381,51381,1134	2224,2224,0,0	3,2,-1,-1
ENSMUSG00000101628.1	chr1	52077261	52156087	+	3532	2480	3092	2639	2502	2682	3090	2244	2474	2791	Gm28177	ENSMUSG00000101628.1	1	ENSMUST00000185516.1	34	3498	75328	191	13714	0	-1
ENSMUSG00000078291.1	chr1	52090635	52091066	-	432	19	39	24	24	22	14	27	26	26	Gm3940	ENSMUSG00000078291.1	1	ENSMUST00000105087.1	1	431	0	431	0	0	3
ENSMUSG00000109599.1	chr1	52108121	52113751	-	1170	6	9	12	19	32	19	23	18	17	Gm45679	ENSMUSG00000109599.1	1	ENSMUST00000210323.1	2	1168	4462	1138	4462	0	4
ENSMUSG00000026104.14	chr1	52119440	52161865	+	7105	2708	3212	2858	2812	3027	3389	2689	2974	3343	Stat1	ENSMUSG00000026104.14	12	ENSMUST00000186574.6,ENSMUST00000070968.13,ENSMUST00000191435.6,ENSMUST00000186857.6,ENSMUST00000188681.6,ENSMUST00000189347.6,ENSMUST00000186186.1,ENSMUST00000185743.1,ENSMUST00000186057.6,ENSMUST00000189075.1,ENSMUST00000189244.6,ENSMUST00000189336.1	23,25,23,25,6,23,2,8,25,3,8,6	2811,5126,2780,4216,709,2565,546,1336,3973,824,3290,880	33161,37284,33142,37299,12426,33217,289,16944,37133,1471,8315,6427	426,2582,426,1724,144,345,482,573,1447,564,2580,277	5926,5926,5926,5926,5926,5926,289,5926,5926,901,3201,3201	2118,2227,2118,2227,0,2118,0,0,2245,0,724,391	3,3,3,3,3,3,-1,-1,3,-1,-1,-1
ENSMUSG00000099569.1	chr1	52134443	52135330	-	888	0	0	0	0	0	0	0	0	0	Gm18301	ENSMUSG00000099569.1	1	ENSMUST00000185261.1	1	887	0	887	0	0	3
ENSMUSG00000026103.14	chr1	52163448	52233232	-	15057	27944	30702	22353	27499	26898	28281	22890	22460	24422	Gls	ENSMUSG00000026103.14	17	ENSMUST00000114513.8,ENSMUST00000114512.7,ENSMUST00000156887.7,ENSMUST00000136654.1,ENSMUST00000126221.1,ENSMUST00000138906.7,ENSMUST00000114510.7,ENSMUST00000114509.7,ENSMUST00000155587.7,ENSMUST00000129107.1,ENSMUST00000123324.7,ENSMUST00000139273.7,ENSMUST00000148917.1,ENSMUST00000147825.7,ENSMUST00000145514.7,ENSMUST00000151694.1,ENSMUST00000142976.1	18,18,7,2,3,5,15,8,10,4,4,11,3,5,3,4,4	4948,2024,639,689,755,429,5581,3708,3242,364,943,825,2790,675,2396,678,483	64827,64331,24142,2022,2108,22034,43547,11494,23687,2862,6963,23569,1106,10749,6956,7964,17810	2866,373,186,639,660,131,3690,2514,2573,131,631,170,2213,346,2178,378,219	19721,19721,19721,2022,2022,19721,12553,4878,7414,1325,4878,4878,1020,4844,4844,4844,12553	0,0,32,0,0,0,0,0,2546,0,0,0,0,0,0,0,0	18,18,7,4,5,7,15,10,10,6,6,13,5,7,5,6,6
ENSMUSG00000099648.1	chr1	52287697	52289095	-	1399	0	0	0	0	0	0	0	0	0	Gm5975	ENSMUSG00000099648.1	1	ENSMUST00000185256.1	1	1398	0	1398	0	0	3
ENSMUSG00000065192.1	chr1	52444436	52444544	-	109	0	0	0	0	3	0	0	0	0	Gm23460	ENSMUSG00000065192.1	1	ENSMUST00000083258.1	1	108	0	108	0	0	3
ENSMUSG00000002881.14	chr1	52457294	52500679	-	4100	11060	15513	14090	13808	14676	14831	12672	13657	17245	Nab1	ENSMUSG00000002881.14	5	ENSMUST00000186764.6,ENSMUST00000069792.13,ENSMUST00000170269.1,ENSMUST00000167732.1,ENSMUST00000168082.1	9,8,6,4,2	3631,3866,1365,510,431	39375,39519,30153,7306,9574	2012,2012,815,167,326	12259,12259,14291,2782,9574	0,0,0,0,0	9,8,6,6,4
ENSMUSG00000097833.1	chr1	52503234	52504229	-	996	1	0	0	1	2	2	0	0	6	Gm5976	ENSMUSG00000097833.1	1	ENSMUST00000180794.1	1	995	0	995	0	0	3
ENSMUSG00000101501.1	chr1	52522239	52522701	+	463	6	2	7	7	1	1	7	7	0	Rps27a-ps1	ENSMUSG00000101501.1	1	ENSMUST00000191424.1	1	462	0	462	0	0	-1
ENSMUSG00000100120.1	chr1	52522902	52582679	+	701	4	0	2	13	0	1	0	0	0	Gm553	ENSMUSG00000100120.1	1	ENSMUST00000189527.1	5	696	59081	249	17446	0	-1
ENSMUSG00000099878.1	chr1	52570014	52580291	-	2943	2	0	0	3	0	4	0	0	0	Gm28178	ENSMUSG00000099878.1	1	ENSMUST00000188544.1	6	2937	7340	2474	2647	0	8
ENSMUSG00000100007.1	chr1	52584518	52585159	+	642	45	60	37	35	36	58	29	29	57	Gm5527	ENSMUSG00000100007.1	1	ENSMUST00000179821.2	1	641	0	641	0	0	-1
ENSMUSG00000043015.15	chr1	52630703	52651919	+	7078	1592	1826	1478	1742	1739	1728	1086	1086	1374	Nemp2	ENSMUSG00000043015.15	8	ENSMUST00000165859.7,ENSMUST00000188507.6,ENSMUST00000185483.6,ENSMUST00000190108.6,ENSMUST00000185790.6,ENSMUST00000186903.6,ENSMUST00000190452.6,ENSMUST00000191076.1	9,8,9,4,5,4,5,3	3387,3239,2014,3503,1566,4334,1613,802	17829,17943,17875,16474,18339,6069,7059,4044	2213,2213,930,2189,996,2213,950,321	6514,6514,6514,11270,7781,3264,3264,3264	1257,702,624,0,267,0,0,0	1,1,1,-1,-1,-1,-1,-1
ENSMUSG00000103630.1	chr1	52653808	52655892	-	2085	4	0	2	6	16	2	9	2	5	Gm37242	ENSMUSG00000103630.1	1	ENSMUST00000191873.1	1	2084	0	2084	0	0	3
ENSMUSG00000041439.15	chr1	52656286	52727462	-	8231	992	908	911	911	833	828	607	615	797	Mfsd6	ENSMUSG00000041439.15	6	ENSMUST00000156876.7,ENSMUST00000147758.7,ENSMUST00000188126.1,ENSMUST00000087701.3,ENSMUST00000149887.1,ENSMUST00000147421.1	7,7,1,6,4,3	4925,3709,2863,3487,625,2878	66251,48959,0,63989,7823,48857	2259,2018,2863,1591,184,1591	31589,31589,0,31589,5723,31589	0,2010,0,0,0,0	7,7,3,6,6,5
ENSMUSG00000100302.1	chr1	52702272	52704762	-	2491	27	3	10	31	33	8	4	7	22	Gm29670	ENSMUSG00000100302.1	1	ENSMUST00000190228.1	1	2490	0	2490	0	0	3
ENSMUSG00000100230.1	chr1	52756719	52757129	+	411	1	5	6	0	0	0	0	0	0	Gm28650	ENSMUSG00000100230.1	1	ENSMUST00000188413.1	1	410	0	410	0	0	-1
ENSMUSG00000026102.9	chr1	52785427	52817688	-	6460	1478	1667	1487	1359	1543	1519	1319	1339	1793	Inpp1	ENSMUSG00000026102.9	6	ENSMUST00000027271.8,ENSMUST00000177279.7,ENSMUST00000159607.1,ENSMUST00000162576.7,ENSMUST00000162351.1,ENSMUST00000159725.1	6,4,3,4,3,3	5761,1126,913,372,422,538	26500,8694,4079,22531,20050,2767	4790,549,578,251,251,252	17866,4615,2608,17976,17866,2184	0,0,0,0,0,0	6,2,5,6,5,5
ENSMUSG00000041426.12	chr1	52844929	52920986	+	6059	4255	4817	3757	3996	4302	4351	4350	4896	5320	Hibch	ENSMUSG00000041426.12	7	ENSMUST00000186922.1,ENSMUST00000159352.7,ENSMUST00000161125.7,ENSMUST00000044478.6,ENSMUST00000161552.1,ENSMUST00000159431.1,ENSMUST00000162609.1	1,12,7,14,3,5,4	3764,1692,729,1816,290,400,468	0,74276,39564,74124,8085,35831,10659	3764,718,234,723,133,132,300	0,16145,16145,16145,6318,16145,8279	0,924,0,1144,0,0,0	-1,1,-1,1,-1,-1,-1
ENSMUSG00000089802.1	chr1	52873137	52873998	-	862	0	0	0	0	0	0	0	0	0	Gm16107	ENSMUSG00000089802.1	1	ENSMUST00000162523.1	1	861	0	861	0	0	3
ENSMUSG00000043629.12	chr1	52922324	53020179	-	4330	37	66	32	18	32	50	24	34	46	1700019D03Rik	ENSMUSG00000043629.12	7	ENSMUST00000050567.10,ENSMUST00000114492.7,ENSMUST00000114493.1,ENSMUST00000191441.1,ENSMUST00000190831.6,ENSMUST00000186266.1,ENSMUST00000190726.1	2,2,2,2,3,2,4	3639,3563,3617,636,650,621,698	26881,27463,37319,94360,66818,46237,66760	3410,3410,3410,551,547,546,536	26881,27463,37319,94360,65535,46237,64372	-316,-316,-316,-316,-316,-316,-316	2,2,2,2,3,2,4
ENSMUSG00000026100.6	chr1	53061640	53068079	+	2705	27	15	23	7	21	3	38	6	14	Mstn	ENSMUSG00000026100.6	2	ENSMUST00000027269.6,ENSMUST00000191197.1	3,3	2702,2458	3737,3930	1828,1794	1995,2188	1128,567	1,1
ENSMUSG00000089334.1	chr1	53100050	53100150	+	101	0	0	0	0	0	0	0	0	0	Gm24349	ENSMUSG00000089334.1	1	ENSMUST00000158709.1	1	100	0	100	0	0	-1
ENSMUSG00000060715.9	chr1	53158577	53187636	-	777	40	16	35	48	38	50	50	32	50	1700019A02Rik	ENSMUSG00000060715.9	2	ENSMUST00000072235.9,ENSMUST00000190748.1	9,10	637,716	28422,28292	211,188	7312,7312	0,0	9,10
ENSMUSG00000026098.13	chr1	53189187	53297018	-	7542	7518	8497	7191	6818	7168	7958	6688	6446	6711	Pms1	ENSMUSG00000026098.13	8	ENSMUST00000027267.13,ENSMUST00000135246.7,ENSMUST00000142922.1,ENSMUST00000128337.7,ENSMUST00000133358.1,ENSMUST00000126590.1,ENSMUST00000126412.1,ENSMUST00000188890.1	13,11,5,4,2,3,3,1	3041,2194,3049,643,598,456,472,1722	104790,97711,31023,28469,6689,21416,14596,0	850,850,2533,243,467,196,283,1722	40282,40282,14794,14640,6689,14727,8287,0	0,0,0,0,0,0,0,0	13,13,7,6,4,5,5,3
ENSMUSG00000100763.1	chr1	53196113	53197695	+	535	0	0	0	0	0	0	0	0	0	Gm28777	ENSMUSG00000100763.1	1	ENSMUST00000191402.1	3	532	1050	275	619	0	-1
ENSMUSG00000026097.9	chr1	53297095	53310309	+	4711	9458	10419	7014	7731	9247	9534	9686	9736	10444	Ormdl1	ENSMUSG00000026097.9	2	ENSMUST00000135746.7,ENSMUST00000027266.3	2,4	3074,1906	1784,11308	2981,1482	1784,6303	0,459	-1,2
ENSMUSG00000100679.1	chr1	53297111	53318035	+	785	2047	2481	1504	1743	1877	1979	2005	2049	2203	Gm28778	ENSMUSG00000100679.1	1	ENSMUST00000190734.1	5	780	20144	239	9254	0	2
ENSMUSG00000026096.14	chr1	53313624	53326343	+	6147	2771	3164	2494	2556	2830	2691	2293	2498	2566	Osgepl1	ENSMUSG00000026096.14	7	ENSMUST00000027265.9,ENSMUST00000151296.7,ENSMUST00000135786.7,ENSMUST00000153939.1,ENSMUST00000114484.7,ENSMUST00000135614.7,ENSMUST00000150115.1	8,7,3,2,7,9,5	1860,1585,595,4003,2276,1714,1062	10859,10935,2380,998,8125,10780,5404	387,382,243,3802,897,387,587	2803,2808,1382,998,2803,2803,2734	1239,301,0,0,1239,1111,0	2,2,-1,-1,2,2,-1
ENSMUSG00000099913.1	chr1	53325507	53352667	-	3142	19708	23693	18546	19406	21205	21846	17707	19152	20287	Gm28551	ENSMUSG00000099913.1	1	ENSMUST00000144660.2	7	3135	24025	1543	16172	0	6
ENSMUSG00000101838.6	chr1	53326206	53342186	-	1319	52	87	50	62	71	50	64	65	44	Gm18800	ENSMUSG00000101838.6	2	ENSMUST00000188688.6,ENSMUST00000186588.1	6,3	1099,634	6038,15320	281,225	2099,11565	0,0	8,5
ENSMUSG00000026095.15	chr1	53344617	53352752	-	3528	20606	24680	19181	20128	22000	22713	18338	19805	21028	Asnsd1	ENSMUSG00000026095.15	5	ENSMUST00000027264.9,ENSMUST00000123519.8,ENSMUST00000147021.8,ENSMUST00000154402.2,ENSMUST00000136468.1	6,6,5,3,2	2436,977,1257,790,656	5699,7130,3664,2247,1597	1543,334,727,395,616	1601,1685,1429,1429,1597	0,0,0,0,0	6,6,2,5,4
ENSMUSG00000100267.1	chr1	53362149	53362471	-	323	0	0	0	0	0	0	0	0	0	Gm28779	ENSMUSG00000100267.1	1	ENSMUST00000189678.1	1	322	0	322	0	0	3
ENSMUSG00000099450.1	chr1	53363114	53363686	+	573	0	0	0	0	0	0	0	0	0	Gm6799	ENSMUSG00000099450.1	1	ENSMUST00000186919.1	1	572	0	572	0	0	-1
ENSMUSG00000100069.1	chr1	53390415	53392585	+	339	0	0	0	0	0	0	0	0	0	Gm6801	ENSMUSG00000100069.1	1	ENSMUST00000190697.1	2	337	1833	188	1833	0	-1
ENSMUSG00000096141.2	chr1	53397006	53706784	-	12767	124	138	143	77	166	120	131	86	133	Dnah7a	ENSMUSG00000096141.2	2	ENSMUST00000094964.6,ENSMUST00000189677.1	66,4	12179,728	297576,8026	872,498	21147,4598	0,0	66,6
ENSMUSG00000092657.1	chr1	53443271	53443395	-	125	0	0	0	0	0	0	0	0	0	Gm25240	ENSMUSG00000092657.1	1	ENSMUST00000174916.1	1	124	0	124	0	0	3
ENSMUSG00000026094.14	chr1	53755506	53785224	-	5185	3294	3824	3047	2825	3043	3123	2444	2489	2437	Stk17b	ENSMUSG00000026094.14	3	ENSMUST00000027263.13,ENSMUST00000187066.1,ENSMUST00000185920.1	8,1,6	3285,2120,625	26433,0,23383	2264,2120,212	8395,0,13252	0,0,0	8,3,8
ENSMUSG00000102405.1	chr1	53791201	53792657	+	1457	0	0	0	0	0	0	0	0	0	Gm37863	ENSMUSG00000102405.1	1	ENSMUST00000194911.1	1	1456	0	1456	0	0	-1
ENSMUSG00000042807.15	chr1	53806876	54195168	-	12947	2213	2867	2382	2013	2488	2677	2057	2560	2604	Hecw2	ENSMUSG00000042807.15	6	ENSMUST00000120904.7,ENSMUST00000087659.10,ENSMUST00000150677.7,ENSMUST00000152870.1,ENSMUST00000097741.2,ENSMUST00000146850.1	29,29,4,6,7,4	11234,11142,359,659,1125,1929	375938,377010,8120,26836,263096,251743	6457,6451,152,152,326,1304	153377,154449,6261,11752,154449,154449	0,0,0,0,0,0	29,29,6,8,7,6
ENSMUSG00000098443.1	chr1	53849424	53849495	+	72	0	0	0	0	0	0	0	0	0	Mir7681	ENSMUSG00000098443.1	1	ENSMUST00000184834.1	1	71	0	71	0	0	-1
ENSMUSG00000087949.1	chr1	53886828	53886941	-	114	5	0	0	0	0	0	0	0	0	Gm24251	ENSMUSG00000087949.1	1	ENSMUST00000157324.1	1	113	0	113	0	0	3
ENSMUSG00000102868.1	chr1	54152397	54155096	-	2700	13	14	5	3	3	2	11	6	8	Gm37633	ENSMUSG00000102868.1	1	ENSMUST00000192858.1	1	2699	0	2699	0	0	3
ENSMUSG00000094013.1	chr1	54249102	54249208	-	107	0	7	0	0	0	9	0	3	7	Gm25829	ENSMUSG00000094013.1	1	ENSMUST00000178275.1	1	106	0	106	0	0	3
ENSMUSG00000025983.11	chr1	54250683	54368727	+	5021	111	74	59	82	55	119	95	101	129	Ccdc150	ENSMUSG00000025983.11	5	ENSMUST00000161988.1,ENSMUST00000027128.10,ENSMUST00000160472.7,ENSMUST00000163072.7,ENSMUST00000159682.1	7,28,31,12,8	1197,3779,3665,2094,1878	27081,114265,114083,36522,12129	250,426,220,474,791	9039,23451,23451,22530,4159	0,3305,1727,0,0	-1,1,1,-1,-1
ENSMUSG00000041303.7	chr1	54396004	54438971	-	4925	12772	14456	12537	12632	13120	14410	12645	13453	14292	Gtf3c3	ENSMUSG00000041303.7	3	ENSMUST00000041638.7,ENSMUST00000190419.1,ENSMUST00000189906.1	18,3,2	4564,467,410	38403,3438,1197	1998,350,261	9810,3002,1197	0,0,0	18,5,4
ENSMUSG00000109809.1	chr1	54443404	54456763	-	825	0	8	5	0	0	0	0	0	0	Gm34066	ENSMUSG00000109809.1	1	ENSMUST00000210156.1	6	819	12540	187	7992	0	8
ENSMUSG00000073678.4	chr1	54472994	54557684	-	16611	47215	54073	47905	47990	55420	53662	93924	94477	109321	Pgap1	ENSMUSG00000073678.4	4	ENSMUST00000097739.4,ENSMUST00000185817.1,ENSMUST00000187949.1,ENSMUST00000189506.1	27,12,1,1	10556,1396,3246,3024	74132,32004,0,0	7850,250,3246,3024	12401,6926,0,0	0,0,0,0	27,14,3,3
ENSMUSG00000104136.1	chr1	54518610	54520270	-	1661	103	80	75	135	117	69	78	101	125	Gm36955	ENSMUSG00000104136.1	1	ENSMUST00000194316.1	1	1660	0	1660	0	0	3
ENSMUSG00000101130.1	chr1	54566703	54567281	+	579	2	0	4	2	1	1	3	1	5	Gm19637	ENSMUSG00000101130.1	1	ENSMUST00000185933.1	1	578	0	578	0	0	-1
ENSMUSG00000052331.14	chr1	54645340	54926387	-	14175	3471	4032	3453	3426	3632	4067	2406	2692	2988	Ankrd44	ENSMUSG00000052331.14	15	ENSMUST00000189563.1,ENSMUST00000179030.7,ENSMUST00000044359.15,ENSMUST00000178156.7,ENSMUST00000178226.2,ENSMUST00000177704.7,ENSMUST00000179242.1,ENSMUST00000179398.1,ENSMUST00000178685.1,ENSMUST00000178935.7,ENSMUST00000177919.7,ENSMUST00000180189.7,ENSMUST00000180327.7,ENSMUST00000178905.1,ENSMUST00000177679.1	1,28,28,6,21,9,3,1,3,11,5,6,8,7,5	3273,6112,6164,974,2347,2524,493,1855,1603,2288,634,1356,2493,760,514	0,274935,274881,7616,109712,33512,55370,0,5054,188764,22490,6902,163007,50315,117405	3273,2995,2993,503,216,1390,360,1855,887,1010,212,596,1586,200,192	0,97445,97445,2069,41823,13547,41823,0,3054,97445,9462,2563,97445,20834,55925	0,0,0,258,0,0,0,0,0,0,0,0,0,0,0	3,28,28,6,23,11,5,3,5,13,7,8,10,9,7
ENSMUSG00000101674.6	chr1	54681729	54767524	+	2666	0	2	5	1	0	0	2	0	6	4930444A19Rik	ENSMUSG00000101674.6	2	ENSMUST00000190007.6,ENSMUST00000188243.1	5,3	628,2114	54459,74914	193,1935	35042,38894	0,0	-1,-1
ENSMUSG00000102503.1	chr1	54737166	54738575	-	1410	49	54	41	50	67	40	38	10	21	Gm37370	ENSMUSG00000102503.1	1	ENSMUST00000191996.1	1	1409	0	1409	0	0	3
ENSMUSG00000089245.1	chr1	54769218	54769322	+	105	0	0	0	0	0	0	0	0	0	Gm24053	ENSMUSG00000089245.1	1	ENSMUST00000158620.1	1	104	0	104	0	0	-1
ENSMUSG00000102642.1	chr1	54913845	54916594	-	2750	67	57	14	119	72	56	47	57	69	A130048G24Rik	ENSMUSG00000102642.1	1	ENSMUST00000193052.1	1	2749	0	2749	0	0	3
ENSMUSG00000025982.13	chr1	54985169	55027481	-	11370	136134	165757	139164	144027	150021	169862	147606	164928	176898	Sf3b1	ENSMUSG00000025982.13	8	ENSMUST00000027127.13,ENSMUST00000190175.1,ENSMUST00000185429.1,ENSMUST00000187500.6,ENSMUST00000188859.6,ENSMUST00000191303.1,ENSMUST00000189051.1,ENSMUST00000188419.1	25,3,1,10,4,7,5,2	6170,3347,3588,3393,624,593,799,709	36142,2595,0,20920,6903,14549,10773,289	2323,2319,3588,2007,324,166,381,559	7939,2148,0,7939,4385,7939,7939,289	0,0,0,0,0,0,0,0	25,5,3,12,6,5,7,4
ENSMUSG00000103030.1	chr1	55051319	55053112	-	1794	15	1	7	6	0	3	18	6	22	E330011M16Rik	ENSMUSG00000103030.1	1	ENSMUST00000193614.1	1	1793	0	1793	0	0	3
ENSMUSG00000025981.13	chr1	55052770	55072702	+	4805	3034	2885	2457	2870	3038	3114	2842	2830	3096	Coq10b	ENSMUSG00000025981.13	4	ENSMUST00000087617.10,ENSMUST00000027125.6,ENSMUST00000185474.1,ENSMUST00000185918.1	4,5,1,1	830,1728,1224,2118	18353,18204,0,0	317,1066,1224,2118	11191,8285,0,0	575,724,0,0	1,1,-1,-1
ENSMUSG00000101122.1	chr1	55066264	55067069	+	806	39	28	27	44	50	21	20	50	39	Gm17971	ENSMUSG00000101122.1	1	ENSMUST00000190239.1	1	805	0	805	0	0	-1
ENSMUSG00000025980.14	chr1	55077835	55088243	-	2642	109493	128979	100368	108626	112792	111183	106109	116779	117195	Hspd1	ENSMUSG00000025980.14	3	ENSMUST00000027123.14,ENSMUST00000127861.7,ENSMUST00000144077.2	12,5,3	2411,858,525	7778,4318,3185	605,254,252	1981,1981,1981	0,0,0	12,7,5
ENSMUSG00000073676.4	chr1	55088132	55091307	+	1474	17128	20880	16040	15102	16538	16195	18742	18213	19772	Hspe1	ENSMUSG00000073676.4	2	ENSMUST00000075242.6,ENSMUST00000134628.1	4,2	770,962	2405,639	280,864	1498,639	305,0	1,-1
ENSMUSG00000100736.1	chr1	55120080	55120873	-	794	0	2	1	0	2	0	0	0	4	Gm5147	ENSMUSG00000100736.1	1	ENSMUST00000185999.1	1	793	0	793	0	0	3
ENSMUSG00000089670.1	chr1	55127297	55128287	+	991	0	0	0	0	0	0	0	0	0	Gm16581	ENSMUSG00000089670.1	1	ENSMUST00000160730.1	1	990	0	990	0	0	-1
ENSMUSG00000025979.13	chr1	55131231	55154899	+	4855	20346	20936	17726	19237	21317	21684	21251	20797	24565	Mob4	ENSMUSG00000025979.13	8	ENSMUST00000159311.7,ENSMUST00000162364.7,ENSMUST00000162930.7,ENSMUST00000027122.13,ENSMUST00000161122.1,ENSMUST00000162553.1,ENSMUST00000159743.1,ENSMUST00000187422.1	7,8,7,6,7,8,3,1	1809,2832,3548,739,1136,893,354,887	20898,20836,20090,20978,20936,20570,13703,0	1263,2224,2223,324,684,305,259,887	13765,8385,8385,11809,11580,8385,8385,0	608,670,0,546,135,0,0,0	1,1,-1,-1,1,2,-1,-1
ENSMUSG00000061863.6	chr1	55160747	55161053	-	307	0	1	2	0	0	0	1	3	0	Gm6822	ENSMUSG00000061863.6	1	ENSMUST00000161440.1	1	306	0	306	0	0	3
ENSMUSG00000025978.14	chr1	55170159	55226782	-	5871	1727	2140	1898	1728	1667	1900	1509	1609	2166	Rftn2	ENSMUSG00000025978.14	5	ENSMUST00000027121.14,ENSMUST00000132055.7,ENSMUST00000114428.2,ENSMUST00000133294.1,ENSMUST00000141107.1	9,8,6,2,2	3668,1862,2006,600,1974	52955,53172,23125,1944,866	1923,661,661,447,1313	12868,19506,11818,1944,866	0,0,0,0,0	9,2,6,4,4
ENSMUSG00000097649.2	chr1	55226251	55235622	+	1943	86	115	76	48	77	82	91	106	128	Gm10561	ENSMUSG00000097649.2	2	ENSMUST00000181563.1,ENSMUST00000209801.1	3,3	1940,748	7431,7983	1245,452	5685,6237	0,0	-1,-1
ENSMUSG00000046994.9	chr1	55237177	55248470	+	11294	5436	5949	4654	5619	5598	5398	3754	4397	4214	Mars2	ENSMUSG00000046994.9	1	ENSMUST00000061334.9	1	11293	0	11293	0	1760	1
ENSMUSG00000025977.15	chr1	55248658	55363469	-	3514	55	92	50	51	36	44	22	20	17	Boll	ENSMUSG00000025977.15	7	ENSMUST00000161810.1,ENSMUST00000173983.7,ENSMUST00000114423.6,ENSMUST00000087585.9,ENSMUST00000159564.8,ENSMUST00000159398.1,ENSMUST00000174065.1	3,10,10,10,8,5,2	532,2625,1096,872,743,653,145	50988,89260,61561,62378,62507,16559,11681	306,1809,244,143,143,195,125	29422,29422,17927,17927,17927,6713,11681	420,1788,0,0,0,0,0	2,10,10,10,4,5,4
ENSMUSG00000100215.1	chr1	55335401	55335796	+	396	8982	11470	9054	8644	9018	9941	9734	8951	11887	Gm8292	ENSMUSG00000100215.1	1	ENSMUST00000162574.1	1	395	0	395	0	0	-1
ENSMUSG00000101945.1	chr1	55370016	55370363	-	348	0	0	0	0	0	0	1	0	0	Gm29138	ENSMUSG00000101945.1	1	ENSMUST00000191444.1	1	347	0	347	0	0	3
ENSMUSG00000101085.1	chr1	55381195	55382087	-	893	0	0	0	0	0	0	0	0	0	Gm8531	ENSMUSG00000101085.1	1	ENSMUST00000188319.1	1	892	0	892	0	0	3
ENSMUSG00000038349.10	chr1	55405921	55754285	+	6687	3513	4284	3983	3572	4737	4536	2544	2604	3490	Plcl1	ENSMUSG00000038349.10	2	ENSMUST00000042986.9,ENSMUST00000187059.1	6,4	6574,398	341790,32804	3004,109	289115,19518	3285,0	1,-1
ENSMUSG00000102145.1	chr1	55440904	55445930	+	5027	26	34	29	73	37	62	28	66	35	Gm38056	ENSMUSG00000102145.1	1	ENSMUST00000193928.1	1	5026	0	5026	0	0	-1
ENSMUSG00000100309.1	chr1	55444074	55445024	-	951	2	0	0	0	0	3	0	0	0	Gm6644	ENSMUSG00000100309.1	1	ENSMUST00000186507.1	1	950	0	950	0	0	3
ENSMUSG00000102831.1	chr1	55559460	55561055	+	1596	35	28	28	46	38	42	30	40	25	Gm37382	ENSMUSG00000102831.1	1	ENSMUST00000193032.1	1	1595	0	1595	0	0	-1
ENSMUSG00000099950.1	chr1	55931241	55972328	+	2345	0	0	4	3	6	0	4	0	4	9130227L01Rik	ENSMUSG00000099950.1	2	ENSMUST00000189293.1,ENSMUST00000188040.1	6,3	1900,1633	38957,9781	1018,1248	22415,9353	0,0	-1,-1
ENSMUSG00000102491.1	chr1	55960404	55960756	-	353	0	0	0	0	0	0	0	0	0	Gm36986	ENSMUSG00000102491.1	1	ENSMUST00000195320.1	1	352	0	352	0	0	3
ENSMUSG00000100372.1	chr1	56018978	56020203	+	482	0	0	0	0	0	0	0	0	0	1700003I22Rik	ENSMUSG00000100372.1	2	ENSMUST00000186048.1,ENSMUST00000190280.1	2,2	422,369	803,745	347,339	803,745	0,0	-1,-1
ENSMUSG00000100944.1	chr1	56451407	56451562	+	156	1	4	1	0	0	1	1	2	1	Gm28900	ENSMUSG00000100944.1	1	ENSMUST00000185232.1	1	155	0	155	0	0	-1
ENSMUSG00000101332.1	chr1	56531824	56533876	+	2053	0	0	0	0	0	0	0	0	0	Gm28240	ENSMUSG00000101332.1	1	ENSMUST00000187560.1	1	2052	0	2052	0	0	-1
ENSMUSG00000045336.5	chr1	56636044	56637435	-	1392	3	3	0	0	0	3	8	1	4	Hsfy2	ENSMUSG00000045336.5	1	ENSMUST00000062085.5	1	1391	0	1391	0	-1174	1
ENSMUSG00000038331.15	chr1	56793981	56978650	-	6788	475	638	759	905	924	720	248	235	331	Satb2	ENSMUSG00000038331.15	5	ENSMUST00000042857.13,ENSMUST00000114415.9,ENSMUST00000177424.1,ENSMUST00000176759.1,ENSMUST00000177282.1	10,11,7,2,3	6267,5794,4687,329,451	172254,172078,171197,21377,8459	3263,3258,3256,208,229	70536,48962,76295,21377,4359	0,0,0,0,0	10,11,7,4,5
ENSMUSG00000087022.4	chr1	56971412	57050084	+	5779	670	803	919	1003	1170	743	387	366	445	9130024F11Rik	ENSMUSG00000087022.4	5	ENSMUST00000135238.3,ENSMUST00000187927.1,ENSMUST00000185204.1,ENSMUST00000195462.1,ENSMUST00000187858.1	2,2,5,1,3	1298,515,2623,2861,444	2487,1615,68412,0,9247	939,293,1926,2861,216	2487,1615,36043,0,9109	0,0,0,0,0	-1,-1,-1,-1,-1
ENSMUSG00000104310.1	chr1	56976803	56978640	+	1838	6	1	1	8	0	0	1	0	7	Gm4081	ENSMUSG00000104310.1	1	ENSMUST00000195287.1	1	1837	0	1837	0	0	-1
ENSMUSG00000094128.1	chr1	56999155	56999275	-	121	0	1	0	0	0	0	0	0	0	Gm23943	ENSMUSG00000094128.1	1	ENSMUST00000179712.1	1	120	0	120	0	0	3
ENSMUSG00000099945.1	chr1	57127340	57129400	+	2061	0	0	0	0	0	0	0	0	0	1700126A01Rik	ENSMUSG00000099945.1	1	ENSMUST00000185283.1	1	2060	0	2060	0	0	-1
ENSMUSG00000101429.1	chr1	57200645	57214993	-	3301	2	7	24	25	24	9	12	0	8	BC055402	ENSMUSG00000101429.1	1	ENSMUST00000190488.1	7	3294	11054	2202	3367	0	9
ENSMUSG00000101129.1	chr1	57291425	57292401	-	977	0	0	0	0	0	1	0	0	0	Gm5254	ENSMUSG00000101129.1	1	ENSMUST00000188353.1	1	976	0	976	0	0	3
ENSMUSG00000097519.2	chr1	57359222	57377544	-	2052	459	542	469	487	484	606	317	418	350	4930558J18Rik	ENSMUSG00000097519.2	1	ENSMUST00000181949.2	4	2048	16274	1441	12485	0	6
ENSMUSG00000038323.3	chr1	57377620	57385423	+	3235	5024	5686	4947	5163	6203	5914	3096	3090	3391	1700066M21Rik	ENSMUSG00000038323.3	3	ENSMUST00000042734.2,ENSMUST00000185952.1,ENSMUST00000187255.1	2,3,2	3006,538,342	4797,1991,2096	2680,313,306	4797,1761,2096	1096,0,0	1,-1,-1
ENSMUSG00000048495.16	chr1	57388237	57407101	-	2808	1964	2170	1803	1996	1956	2212	1866	1923	2192	Tyw5	ENSMUSG00000048495.16	10	ENSMUST00000162686.7,ENSMUST00000097732.10,ENSMUST00000079998.12,ENSMUST00000162663.1,ENSMUST00000161727.7,ENSMUST00000160837.7,ENSMUST00000161092.1,ENSMUST00000163039.7,ENSMUST00000160118.4,ENSMUST00000161780.2	8,7,8,2,4,9,3,5,7,5	1839,1747,1390,476,862,757,473,449,688,703	17025,16484,17044,1890,4420,17020,2581,10361,14354,12649	717,741,512,347,348,137,291,153,137,302	4861,4861,4861,1890,1890,4861,1890,4573,4861,4861	0,0,0,0,0,0,0,0,0,0	8,9,5,4,6,11,5,7,5,7
ENSMUSG00000025971.6	chr1	57406328	57417953	+	7878	3441	4099	3357	3841	3819	3833	3791	3827	4526	9430016H08Rik	ENSMUSG00000025971.6	2	ENSMUST00000027114.5,ENSMUST00000185709.1	5,1	3535,4873	8090,0	2297,4873	2690,0	871,0	1,-1
ENSMUSG00000077776.1	chr1	57422244	57422373	-	130	0	0	0	0	0	0	0	0	0	Gm22371	ENSMUSG00000077776.1	1	ENSMUST00000104588.1	1	129	0	129	0	0	3
ENSMUSG00000088353.1	chr1	57467870	57468026	+	157	0	0	0	0	0	0	0	0	0	Gm24014	ENSMUSG00000088353.1	1	ENSMUST00000157728.1	1	156	0	156	0	0	-1
ENSMUSG00000101826.1	chr1	57518523	57519412	-	890	0	0	0	5	0	0	0	0	0	Gm8581	ENSMUSG00000101826.1	1	ENSMUST00000188636.1	1	889	0	889	0	0	3
ENSMUSG00000102685.1	chr1	57520831	57523642	-	2812	0	0	0	0	0	0	0	0	0	Gm37373	ENSMUSG00000102685.1	1	ENSMUST00000194005.1	1	2811	0	2811	0	0	3
ENSMUSG00000101151.1	chr1	57561298	57564051	-	627	0	0	0	0	0	0	0	0	0	Gm17929	ENSMUSG00000101151.1	1	ENSMUST00000186851.1	2	625	2128	548	2128	0	4
ENSMUSG00000038305.14	chr1	57774162	57948394	+	8041	1834	2178	2121	2000	1826	2277	2145	2219	2763	Spats2l	ENSMUSG00000038305.14	15	ENSMUST00000172287.7,ENSMUST00000168905.7,ENSMUST00000172068.7,ENSMUST00000163239.7,ENSMUST00000163922.1,ENSMUST00000167971.7,ENSMUST00000170139.7,ENSMUST00000171699.7,ENSMUST00000164302.7,ENSMUST00000167085.7,ENSMUST00000168016.7,ENSMUST00000165235.1,ENSMUST00000168895.1,ENSMUST00000169772.2,ENSMUST00000164353.1	7,5,9,12,2,7,13,10,12,14,4,3,2,12,4	816,650,1012,2301,1205,684,2302,955,2076,3915,2344,414,382,2299,321	110790,104824,126796,170298,24814,110552,169928,162322,170134,169618,80307,56980,24281,99095,37982	401,242,246,893,1133,201,894,246,894,2326,2077,253,275,894,153	32699,32699,32699,80154,24814,32699,56110,32699,56110,32699,32699,32699,24281,23984,21142	0,0,0,1345,0,0,1663,0,1457,1725,0,0,0,1663,0	3,-1,3,5,-1,3,3,3,3,3,-1,-1,-1,2,-1
ENSMUSG00000091283.1	chr1	57909835	57917111	-	392	0	0	0	0	0	0	0	2	1	Gm17234	ENSMUSG00000091283.1	1	ENSMUST00000172128.1	2	390	6886	275	6886	0	4
ENSMUSG00000054770.16	chr1	57955101	58018956	-	12973	3525	3983	3450	3907	3645	3990	3742	3274	5056	Kctd18	ENSMUSG00000054770.16	11	ENSMUST00000164963.7,ENSMUST00000114410.9,ENSMUST00000161608.7,ENSMUST00000163061.7,ENSMUST00000159826.1,ENSMUST00000160614.8,ENSMUST00000163006.1,ENSMUST00000068000.9,ENSMUST00000189298.1,ENSMUST00000162410.7,ENSMUST00000160130.1	4,7,7,10,4,4,3,5,1,3,2	2110,2505,2488,5006,595,703,403,2602,1823,2258,4179	12873,12375,11783,57878,12873,6052,4979,7396,0,4255,2298	1719,1572,1567,3330,240,379,201,1941,1823,1974,4121	8252,2656,2656,35144,8252,2656,2656,2298,0,2298,2298	0,0,0,0,0,0,0,0,0,0,0	4,7,4,7,6,6,5,7,3,5,4
ENSMUSG00000026039.9	chr1	57995971	58025899	+	7007	13748	18367	15535	13884	15276	17329	11026	12988	11893	Sgol2a	ENSMUSG00000026039.9	2	ENSMUST00000027202.8,ENSMUST00000190746.1	9,1	4930,3182	24998,0	2624,3182	10528,0	3487,0	2,-1
ENSMUSG00000063558.4	chr1	58029931	58106413	+	8690	65	72	56	55	49	68	48	79	102	Aox1	ENSMUSG00000063558.4	2	ENSMUST00000001027.6,ENSMUST00000160168.1	35,15	4388,6414	72094,34501	385,4184	11378,11378	3967,0	1,-1
ENSMUSG00000064294.12	chr1	58113130	58200698	+	7033	4	22	11	27	9	3	8	20	8	Aox3	ENSMUSG00000064294.12	5	ENSMUST00000161549.1,ENSMUST00000040999.13,ENSMUST00000159014.1,ENSMUST00000162011.2,ENSMUST00000160815.1	2,35,5,8,4	320,4571,1921,1560,644	1559,82991,7046,24376,1979	182,528,1127,906,241	1559,10509,3670,10509,999	0,3973,0,805,0	-1,1,-1,1,-1
ENSMUSG00000089275.1	chr1	58154981	58155088	-	108	0	0	0	0	0	0	0	0	0	Gm24548	ENSMUSG00000089275.1	1	ENSMUST00000158650.1	1	107	0	107	0	0	3
ENSMUSG00000038242.12	chr1	58210397	58268597	+	8416	57	70	82	69	80	39	27	26	41	Aox4	ENSMUSG00000038242.12	5	ENSMUST00000040442.5,ENSMUST00000161833.7,ENSMUST00000159240.1,ENSMUST00000189059.1,ENSMUST00000161926.1	35,29,3,1,2	4938,3873,1040,2144,338	53262,46077,3919,0,4217	837,464,806,2144,237	4354,4354,2394,0,4217	3976,0,0,0,0	1,-1,-1,-1,-1
ENSMUSG00000089822.1	chr1	58254117	58315656	-	3723	0	0	0	0	0	0	0	0	8	Gm15759	ENSMUSG00000089822.1	1	ENSMUST00000161126.1	6	3717	57822	2828	16266	0	8
ENSMUSG00000079554.2	chr1	58278326	58380259	+	5771	3	7	3	19	4	6	5	10	1	Aox2	ENSMUSG00000079554.2	1	ENSMUST00000114366.2	36	5735	96198	1618	17177	4003	1
ENSMUSG00000103839.1	chr1	58383512	58386134	-	2623	102	137	92	148	89	110	100	68	147	Gm37607	ENSMUSG00000103839.1	1	ENSMUST00000194925.1	1	2622	0	2622	0	0	3
ENSMUSG00000051223.14	chr1	58392898	58407353	+	4033	103549	115082	91852	100808	105722	109243	88407	102535	101835	Bzw1	ENSMUSG00000051223.14	4	ENSMUST00000050552.14,ENSMUST00000188898.6,ENSMUST00000188630.6,ENSMUST00000186949.1	12,8,10,12	3864,855,1605,1480	10591,9025,10750,10181	2318,170,452,176	3401,4729,3401,3401	1249,0,315,1344	2,2,2,1
ENSMUSG00000026034.17	chr1	58410189	58424066	-	8132	16627	15897	16858	18130	14486	19868	16076	14093	16959	Clk1	ENSMUSG00000026034.17	13	ENSMUST00000156931.7,ENSMUST00000139787.7,ENSMUST00000141570.7,ENSMUST00000123580.7,ENSMUST00000034868.13,ENSMUST00000148330.7,ENSMUST00000151338.7,ENSMUST00000129303.1,ENSMUST00000186552.6,ENSMUST00000135380.1,ENSMUST00000129577.7,ENSMUST00000131051.1,ENSMUST00000147258.1	11,2,3,7,13,12,11,3,5,4,4,2,2	4854,554,920,2095,1783,1693,1527,935,719,680,3187,428,454	9023,307,517,2670,10283,10373,10539,574,5089,5963,4736,88,1986	2151,340,490,1067,340,340,340,435,277,370,1641,269,308	2329,307,307,900,2329,2329,2583,364,2329,2329,2284,88,1986	0,0,0,0,0,0,0,0,0,0,0,0,0	13,4,5,9,13,4,4,5,7,6,6,4,4
ENSMUSG00000026035.15	chr1	58430994	58445486	-	4291	5612	6475	4821	5503	6084	5884	5962	5911	6935	Ppil3	ENSMUSG00000026035.15	9	ENSMUST00000117069.7,ENSMUST00000114348.7,ENSMUST00000081677.11,ENSMUST00000186242.1,ENSMUST00000114345.8,ENSMUST00000190048.6,ENSMUST00000185990.1,ENSMUST00000124550.1,ENSMUST00000188896.1	7,7,7,2,6,6,6,5,1	1356,1026,889,423,1169,385,386,482,2138	13079,13414,13600,742,10413,10639,10677,6518,0	618,336,333,310,662,93,93,235,2138	3895,3895,3895,742,3895,3895,3895,2432,0	0,0,0,0,0,0,0,0,0	7,7,7,4,6,8,8,7,3
ENSMUSG00000026036.17	chr1	58445151	58481816	+	7763	7910	8477	7393	7613	7436	8163	7985	8062	9505	Nif3l1	ENSMUSG00000026036.17	8	ENSMUST00000087521.12,ENSMUST00000114337.7,ENSMUST00000129759.1,ENSMUST00000151272.1,ENSMUST00000171597.1,ENSMUST00000140723.1,ENSMUST00000185578.1,ENSMUST00000188295.1	7,7,4,3,6,5,1,2	3762,2161,763,573,2092,705,2784,421	14543,34388,4116,1748,12543,7928,0,3278	2315,830,455,416,1125,259,2784,243	3382,23123,2000,1660,3382,3382,0,3278	1125,984,466,0,1125,0,0,0	2,2,2,3,1,-1,-1,-1
ENSMUSG00000026037.14	chr1	58462771	58505109	-	3857	23050	28488	22111	23399	25065	25538	21519	23698	25313	Orc2	ENSMUSG00000026037.14	5	ENSMUST00000027198.11,ENSMUST00000114325.7,ENSMUST00000151723.1,ENSMUST00000190695.1,ENSMUST00000191206.1	18,15,2,5,4	3543,1572,527,367,366	38795,35640,611,20860,4243	1519,193,489,153,183	9154,9154,611,9154,2888	0,0,0,0,0	18,15,4,7,6
ENSMUSG00000094245.1	chr1	58466515	58466621	-	107	23	19	15	27	3	14	3	15	17	Gm23966	ENSMUSG00000094245.1	1	ENSMUST00000179823.1	1	106	0	106	0	0	3
ENSMUSG00000085054.2	chr1	58505148	58523230	+	4616	39	60	26	54	28	81	33	52	62	Gm15834	ENSMUSG00000085054.2	3	ENSMUST00000160947.1,ENSMUST00000129740.2,ENSMUST00000139825.1	2,4,7	2124,2093,2606	5344,10285,15469	2045,1818,1695	5344,5344,5340	0,0,0	-1,-1,-1
ENSMUSG00000038174.14	chr1	58522806	58586323	-	12041	6327	6956	4998	6068	6727	5018	3584	5207	4339	Fam126b	ENSMUSG00000038174.14	9	ENSMUST00000161600.7,ENSMUST00000097724.9,ENSMUST00000187717.6,ENSMUST00000038372.13,ENSMUST00000161000.1,ENSMUST00000160546.7,ENSMUST00000159980.1,ENSMUST00000191472.1,ENSMUST00000159185.1	12,13,13,12,4,5,4,1,2	8673,4568,3847,2373,386,416,344,2789,435	54844,54677,34364,54735,33702,28515,28573,0,20258	7453,3238,2516,1176,142,147,186,2789,350	20258,20258,7800,20149,28155,20258,20258,0,20258	0,0,0,0,0,0,0,0,0	12,13,5,12,6,7,6,3,4
ENSMUSG00000026032.8	chr1	58586384	58595964	+	763	14532	18209	16361	15339	16123	17125	15384	16001	18705	Ndufb3	ENSMUSG00000026032.8	1	ENSMUST00000027193.8	3	760	8820	315	4420	313	2
ENSMUSG00000100202.1	chr1	58625214	58625565	-	352	0	0	0	0	0	0	0	0	0	Gm29389	ENSMUSG00000100202.1	1	ENSMUST00000191562.1	1	351	0	351	0	0	3
ENSMUSG00000099490.1	chr1	58630375	58637344	+	888	0	0	0	0	0	0	0	0	0	Gm18802	ENSMUSG00000099490.1	1	ENSMUST00000186270.1	2	886	6083	546	6083	0	-1
ENSMUSG00000059647.5	chr1	58646688	58647239	+	552	18	15	15	14	12	33	16	23	12	Cbx3-ps7	ENSMUSG00000059647.5	1	ENSMUST00000081455.5	1	551	0	551	0	0	-1
ENSMUSG00000047528.13	chr1	58646903	58695989	-	3396	0	5	0	2	0	0	1	1	8	Als2cr12	ENSMUSG00000047528.13	6	ENSMUST00000188772.6,ENSMUST00000191565.6,ENSMUST00000055313.13,ENSMUST00000191252.6,ENSMUST00000185953.6,ENSMUST00000188839.1	13,14,15,14,10,3	1369,1475,1525,1228,1969,624	47717,32847,36308,32851,27096,14230	316,314,310,141,1039,394	14181,10916,10916,10920,10916,12534	0,0,0,0,0,0	13,14,15,4,12,5
ENSMUSG00000102059.1	chr1	58652641	58655831	+	936	81	110	75	83	37	39	36	24	57	Gm20257	ENSMUSG00000102059.1	2	ENSMUST00000185352.1,ENSMUST00000188643.1	2,1	934,129	2256,0	886,129	2256,0	0,0	-1,-1
ENSMUSG00000101046.1	chr1	58702309	58703986	+	764	0	0	0	0	0	0	0	0	0	Gm28803	ENSMUSG00000101046.1	1	ENSMUST00000190385.1	2	762	915	396	915	0	-1
ENSMUSG00000026031.15	chr1	58711508	58758884	+	12669	3906	4565	4338	3963	4110	4224	2760	3622	3655	Cflar	ENSMUSG00000026031.15	13	ENSMUST00000149874.7,ENSMUST00000140940.7,ENSMUST00000164900.7,ENSMUST00000156870.1,ENSMUST00000124567.1,ENSMUST00000097723.2,ENSMUST00000097722.8,ENSMUST00000114313.7,ENSMUST00000114309.7,ENSMUST00000123553.1,ENSMUST00000069333.7,ENSMUST00000189858.1,ENSMUST00000123032.1	2,10,4,3,2,3,11,10,5,2,10,1,7	674,2054,690,348,376,705,1760,6562,2005,1098,3153,3676,616	1704,40779,19046,2439,1979,5305,40665,40762,17928,8670,38695,0,21285	590,557,426,186,318,363,507,5100,974,741,1381,3676,135	1704,12647,12647,1979,1979,3601,12647,14714,12647,8670,12647,0,11293	0,0,0,0,0,0,1446,1437,644,0,1437,0,0	-1,-1,-1,-1,-1,-1,3,2,2,-1,2,-1,-1
ENSMUSG00000100236.1	chr1	58785209	58785659	+	451	0	1	1	0	0	0	0	0	1	Gm3841	ENSMUSG00000100236.1	1	ENSMUST00000191399.1	1	450	0	450	0	0	-1
ENSMUSG00000026029.14	chr1	58795374	58847503	+	2893	2234	3052	2532	2376	2746	2840	2088	2438	2956	Casp8	ENSMUSG00000026029.14	4	ENSMUST00000027189.14,ENSMUST00000191201.6,ENSMUST00000165549.7,ENSMUST00000190213.1	9,10,9,10	2576,1839,1908,1618	49553,49438,42598,42483	881,501,501,501	28177,19801,21222,19801	1435,1494,1435,1494	2,2,2,2
ENSMUSG00000102719.1	chr1	58797783	58801623	+	3841	8	7	16	8	6	3	6	13	13	Gm37760	ENSMUSG00000102719.1	1	ENSMUST00000194726.1	1	3840	0	3840	0	0	-1
ENSMUSG00000099719.1	chr1	58850085	58892792	-	944	6	0	0	0	0	0	5	0	0	Gm28802	ENSMUSG00000099719.1	1	ENSMUST00000188624.1	12	932	41775	133	14276	0	14
ENSMUSG00000026028.12	chr1	58900449	58973430	-	7088	8921	11107	10860	11336	11419	10814	7269	8738	9786	Trak2	ENSMUSG00000026028.12	6	ENSMUST00000027186.11,ENSMUST00000174120.1,ENSMUST00000172685.1,ENSMUST00000174359.1,ENSMUST00000173590.1,ENSMUST00000173719.1	16,14,2,3,3,2	6173,2622,1016,247,544,826	66808,40211,2524,1554,46222,26702	3733,678,510,152,288,633	26702,10307,2524,1026,26702,26702	0,0,0,0,0,0	16,14,4,5,5,4
ENSMUSG00000026027.13	chr1	58973522	58995715	+	7256	1893	2225	1717	2072	2058	2153	1436	1392	1878	Stradb	ENSMUSG00000026027.13	7	ENSMUST00000123965.7,ENSMUST00000147637.7,ENSMUST00000114296.7,ENSMUST00000123301.7,ENSMUST00000153990.7,ENSMUST00000027185.10,ENSMUST00000152318.1	3,4,7,11,13,12,6	1975,3072,1341,2059,2521,2948,499	5978,11253,16649,19416,19079,19245,2802	1541,2558,499,704,829,1422,171	3109,5275,5275,5275,4716,5275,1068	0,0,624,563,311,1246,385	-1,-1,2,2,2,2,-1
ENSMUSG00000047383.8	chr1	58997123	59003539	-	878	0	0	0	0	0	0	0	0	0	Als2cr11b	ENSMUSG00000047383.8	1	ENSMUST00000054653.8	2	876	5540	478	5540	0	4
ENSMUSG00000099752.1	chr1	59014224	59059481	+	1193	0	0	0	0	0	2	0	0	0	Gm29018	ENSMUSG00000099752.1	2	ENSMUST00000188707.1,ENSMUST00000191356.1	3,3	922,310	44335,1541	661,205	22721,1142	0,0	-1,-1
ENSMUSG00000072295.5	chr1	59050506	59094900	-	2204	1	1	7	13	0	0	1	8	9	Als2cr11	ENSMUSG00000072295.5	2	ENSMUST00000097080.3,ENSMUST00000149784.1	13,5	2118,376	42276,14327	779,145	16529,6482	0,0	13,7
ENSMUSG00000077616.1	chr1	59070988	59071118	+	131	0	0	0	0	0	0	0	0	0	Gm25502	ENSMUSG00000077616.1	1	ENSMUST00000104428.1	1	130	0	130	0	0	-1
ENSMUSG00000038079.14	chr1	59100590	59120408	-	2389	5372	6181	5419	5378	5900	5846	5347	5249	6157	Tmem237	ENSMUSG00000038079.14	7	ENSMUST00000094917.9,ENSMUST00000087475.10,ENSMUST00000186794.6,ENSMUST00000190014.6,ENSMUST00000185951.1,ENSMUST00000186395.1,ENSMUST00000186820.1	13,13,14,9,4,7,3	1856,1810,1519,780,523,547,456	17648,17399,17952,11137,5009,10771,5631	608,601,287,157,235,137,234	4348,4348,4348,3976,3976,3976,3976	0,0,0,0,0,0,0	13,13,14,11,6,9,5
ENSMUSG00000097573.2	chr1	59119833	59122141	+	2309	306	482	327	259	332	394	286	313	426	G730003C15Rik	ENSMUSG00000097573.2	2	ENSMUST00000180570.1,ENSMUST00000189096.1	1,1	2306,2308	0,0	2306,2308	0,0	0,0	-1,-1
ENSMUSG00000079550.9	chr1	59120935	59163389	-	7063	363	495	469	503	378	518	342	328	450	Mpp4	ENSMUSG00000079550.9	10	ENSMUST00000191200.6,ENSMUST00000078874.13,ENSMUST00000114275.8,ENSMUST00000066374.13,ENSMUST00000187825.6,ENSMUST00000186477.1,ENSMUST00000188494.6,ENSMUST00000189884.6,ENSMUST00000189743.6,ENSMUST00000186790.1	20,22,23,22,14,17,22,9,8,7	2195,2323,2959,2322,2576,1868,3509,3231,1431,1507	35538,38378,39495,38378,22286,35649,36805,9958,10043,11939	509,509,681,508,636,300,1759,1759,640,969	5638,5638,5638,5638,3316,11793,5638,3956,3956,5638	0,0,0,0,0,0,0,0,0,0	20,22,23,22,16,17,24,11,10,9
ENSMUSG00000101586.1	chr1	59151047	59169320	+	2092	0	0	0	0	0	0	0	0	0	Gm29017	ENSMUSG00000101586.1	1	ENSMUST00000190598.1	2	2090	16183	1921	16183	0	-1
ENSMUSG00000099563.1	chr1	59155607	59156989	+	1383	0	0	0	0	0	0	0	0	0	Gm19125	ENSMUSG00000099563.1	1	ENSMUST00000188408.1	1	1382	0	1382	0	0	-1
ENSMUSG00000026024.14	chr1	59162926	59237231	-	9496	6626	8362	7761	7206	7528	8426	5572	6089	6826	Als2	ENSMUSG00000026024.14	5	ENSMUST00000027178.12,ENSMUST00000163058.1,ENSMUST00000159166.7,ENSMUST00000160945.1,ENSMUST00000188469.1	34,34,13,3,1	6308,5345,2964,518,2782	67997,67690,42658,21057,0	1289,919,919,370,2782	16703,16396,16703,16703,0	0,0,0,0,0	34,34,15,5,3
ENSMUSG00000026023.16	chr1	59256906	59352993	+	2507	7	17	16	1	15	6	23	11	16	Cdk15	ENSMUSG00000026023.16	4	ENSMUST00000160662.7,ENSMUST00000114248.2,ENSMUST00000162487.1,ENSMUST00000162906.1	14,14,2,5	2094,1463,341,570	93993,93999,409,52942	723,191,279,178	15812,15812,409,33389	1295,1289,0,0	1,1,-1,-1
ENSMUSG00000099922.1	chr1	59378930	59392299	+	1013	0	0	0	0	0	0	0	0	0	Gm29016	ENSMUSG00000099922.1	1	ENSMUST00000187523.1	4	1009	12360	743	6882	0	-1
ENSMUSG00000104502.1	chr1	59447865	59449502	-	1638	0	0	0	0	0	0	0	0	3	Gm37737	ENSMUSG00000104502.1	1	ENSMUST00000195013.1	1	1637	0	1637	0	0	3
ENSMUSG00000041075.8	chr1	59482424	59486955	+	4532	2850	3645	3588	2693	3431	3446	5631	5867	6019	Fzd7	ENSMUSG00000041075.8	1	ENSMUST00000114246.3	1	4531	0	4531	0	1718	1
ENSMUSG00000097819.1	chr1	59488480	59492605	-	3587	3	0	2	1	0	5	0	0	0	Gm26813	ENSMUSG00000097819.1	1	ENSMUST00000180778.1	2	3585	540	3226	540	0	4
ENSMUSG00000047361.16	chr1	59516264	59636417	+	5484	91	132	113	121	89	98	55	69	97	Gm973	ENSMUSG00000047361.16	10	ENSMUST00000114243.7,ENSMUST00000186434.2,ENSMUST00000185291.1,ENSMUST00000186310.1,ENSMUST00000187979.1,ENSMUST00000212835.1,ENSMUST00000187454.6,ENSMUST00000185753.6,ENSMUST00000191051.1,ENSMUST00000190490.1	20,7,2,5,3,3,5,4,4,5	3575,1423,646,916,424,288,575,608,344,928	114670,26810,11427,13044,8204,25121,20904,22879,8485,5166	515,447,508,255,218,137,172,308,150,332	25258,14337,11427,6117,4420,14464,17282,17282,5642,1888	3160,0,0,0,0,0,0,0,0,734	1,1,-1,-1,-1,-1,-1,-1,-1,-1
ENSMUSG00000099811.6	chr1	59532991	59549521	-	694	0	0	0	0	0	0	0	0	0	Gm28411	ENSMUSG00000099811.6	2	ENSMUST00000191318.6,ENSMUST00000189864.1	3,3	461,338	15336,7025	251,145	9197,6889	0,0	5,5
ENSMUSG00000101409.1	chr1	59534811	59537229	-	421	0	0	4	6	1	0	2	5	4	1700122D07Rik	ENSMUSG00000101409.1	1	ENSMUST00000186973.1	2	419	1999	237	1999	0	4
ENSMUSG00000026021.15	chr1	59586558	59670834	-	2076	38176	44274	37897	40053	44073	41487	37951	42149	43080	Sumo1	ENSMUSG00000026021.15	4	ENSMUST00000191158.6,ENSMUST00000091374.8,ENSMUST00000185265.1,ENSMUST00000123857.1	4,5,4,3	524,1210,528,826	83710,30190,30267,26012	202,834,324,598	35849,15148,15148,15148	0,0,0,0	6,5,4,5
ENSMUSG00000089276.1	chr1	59626580	59626664	+	85	0	0	0	0	0	0	0	0	0	Gm24545	ENSMUSG00000089276.1	1	ENSMUST00000158651.1	1	84	0	84	0	0	-1
ENSMUSG00000103821.1	chr1	59646200	59648071	-	1872	138	137	122	192	171	167	145	101	148	D430013B06Rik	ENSMUSG00000103821.1	1	ENSMUST00000192922.1	1	1871	0	1871	0	0	3
ENSMUSG00000101400.1	chr1	59673241	59673625	+	385	6	3	0	11	6	0	2	4	0	Gm29596	ENSMUSG00000101400.1	1	ENSMUST00000185710.1	1	384	0	384	0	0	-1
ENSMUSG00000026020.9	chr1	59684971	59719044	+	10758	52370	66184	52831	56584	53041	57267	61117	62581	70567	Nop58	ENSMUSG00000026020.9	15	ENSMUST00000191088.6,ENSMUST00000027174.9,ENSMUST00000190231.6,ENSMUST00000189289.6,ENSMUST00000186044.1,ENSMUST00000191142.6,ENSMUST00000185772.6,ENSMUST00000189327.6,ENSMUST00000190759.6,ENSMUST00000185368.1,ENSMUST00000189919.6,ENSMUST00000190265.6,ENSMUST00000187491.1,ENSMUST00000187837.6,ENSMUST00000188390.1	4,13,6,3,2,15,5,6,4,6,6,7,5,7,7	572,1700,633,650,723,9492,456,696,619,885,592,707,368,631,578	7123,24833,10459,7035,5260,24543,10575,12672,7588,10880,7542,7941,4572,6450,5993	255,249,241,351,503,7773,205,176,383,284,136,145,134,163,163	5260,5260,3344,5260,5260,5260,3589,5260,3589,3250,2426,2426,1939,1939,1939	0,1322,0,0,0,1596,0,179,0,0,434,570,179,0,0	-1,1,6,-1,-1,1,5,1,-1,-1,-1,-1,-1,-1,-1
ENSMUSG00000077345.1	chr1	59691934	59692020	+	87	73	87	65	101	53	63	77	76	71	Snord70	ENSMUSG00000077345.1	1	ENSMUST00000104157.1	1	86	0	86	0	0	-1
ENSMUSG00000077358.1	chr1	59692509	59692592	+	84	80	66	62	65	66	98	97	58	70	Gm26293	ENSMUSG00000077358.1	1	ENSMUST00000104170.1	1	83	0	83	0	0	-1
ENSMUSG00000089512.3	chr1	59704258	59704338	+	81	26	17	5	19	11	10	7	14	10	Gm26287	ENSMUSG00000089512.3	1	ENSMUST00000158887.3	1	80	0	80	0	0	-1
ENSMUSG00000089093.3	chr1	59704790	59704873	+	84	79	75	24	61	45	45	65	64	81	Snord11	ENSMUSG00000089093.3	1	ENSMUST00000158468.3	1	83	0	83	0	0	-1
ENSMUSG00000067336.6	chr1	59763400	59879014	+	17983	16285	20785	18982	16506	19516	22516	15763	18042	19713	Bmpr2	ENSMUSG00000067336.6	3	ENSMUST00000087435.6,ENSMUST00000190659.1,ENSMUST00000186246.1	13,2,1	12886,730,4718	102728,956,0	8779,673,4718	48860,956,0	3104,0,0	1,-1,-1
ENSMUSG00000104052.1	chr1	59801263	59804700	+	3438	89	93	48	105	119	65	54	79	75	Gm38125	ENSMUSG00000104052.1	1	ENSMUST00000194136.1	1	3437	0	3437	0	0	-1
ENSMUSG00000103131.1	chr1	59886969	59887689	-	721	0	0	0	0	1	5	0	0	0	Gm37977	ENSMUSG00000103131.1	1	ENSMUST00000193096.1	1	720	0	720	0	0	3
ENSMUSG00000041040.12	chr1	59913006	59985346	+	7290	7871	8372	7886	8466	8638	9063	8703	8846	10740	Fam117b	ENSMUSG00000041040.12	3	ENSMUST00000036540.11,ENSMUST00000151630.1,ENSMUST00000189790.1	8,4,1	5524,414,1757	66816,10421,0	3937,157,1757	35301,4275,0	1747,250,0	1,-1,-1
ENSMUSG00000103696.1	chr1	59929688	59935102	+	5415	129	92	49	178	143	45	109	151	127	Gm37531	ENSMUSG00000103696.1	1	ENSMUST00000191628.1	1	5414	0	5414	0	0	-1
ENSMUSG00000100901.1	chr1	59950403	59952464	-	1622	0	0	0	0	0	0	0	0	0	Gm18829	ENSMUSG00000100901.1	1	ENSMUST00000188150.1	3	1619	442	701	265	0	5
ENSMUSG00000026018.12	chr1	59982490	60043184	-	5356	1479	1535	1502	1682	1693	1487	1311	1098	2198	Ica1l	ENSMUSG00000026018.12	6	ENSMUST00000185891.1,ENSMUST00000027172.12,ENSMUST00000191251.6,ENSMUST00000189776.1,ENSMUST00000187364.1,ENSMUST00000186970.1	3,11,11,11,2,4	513,3639,3404,1309,617,947	7924,50380,50643,35796,6743,21446	379,2171,2164,260,580,593	7306,14561,14824,6743,6743,14834	0,0,0,0,0,0	5,11,11,11,4,6
ENSMUSG00000026019.15	chr1	60069785	60098645	-	11955	17968	21035	17262	18482	17872	19481	18523	17590	19758	Wdr12	ENSMUSG00000026019.15	8	ENSMUST00000027173.14,ENSMUST00000122038.7,ENSMUST00000117438.7,ENSMUST00000147413.1,ENSMUST00000136461.1,ENSMUST00000143342.7,ENSMUST00000141417.2,ENSMUST00000133767.1	13,14,14,2,2,6,6,2	9999,2836,3237,806,273,764,714,718	18124,18442,18540,1871,1871,9320,9380,2981	8456,1373,1373,755,228,220,160,528	3318,3318,3318,1871,1871,3318,3318,2981	0,0,0,0,0,0,0,0	13,14,14,4,4,8,8,4
ENSMUSG00000026017.13	chr1	60098247	60153953	+	14557	2784	3110	2486	2750	3286	3079	2869	3331	3534	Carf	ENSMUSG00000026017.13	10	ENSMUST00000130075.7,ENSMUST00000150008.7,ENSMUST00000124986.7,ENSMUST00000191232.1,ENSMUST00000187978.6,ENSMUST00000180952.7,ENSMUST00000027171.11,ENSMUST00000186107.6,ENSMUST00000186779.1,ENSMUST00000132949.2	18,2,5,1,15,14,14,12,1,4	2745,3793,405,3234,5448,2143,2088,1825,2415,489	50040,7004,27308,0,43161,40505,40610,40873,0,6090	451,3750,123,3234,3372,369,369,369,2415,194	15402,7004,15402,0,15402,15402,15402,15402,0,4541	260,0,0,0,2056,2056,1951,761,0,165	4,-1,3,-1,2,1,1,1,-1,-1
ENSMUSG00000082609.1	chr1	60117255	60117685	+	431	7	5	5	14	17	17	17	15	31	Gm15464	ENSMUSG00000082609.1	1	ENSMUST00000118718.1	1	430	0	430	0	0	-1
ENSMUSG00000073664.11	chr1	60180599	60338328	+	28441	14257	15545	14667	13792	16396	16935	19930	20798	23403	Nbeal1	ENSMUSG00000073664.11	10	ENSMUST00000160834.7,ENSMUST00000187195.1,ENSMUST00000160980.2,ENSMUST00000185573.1,ENSMUST00000188450.6,ENSMUST00000035569.11,ENSMUST00000162291.7,ENSMUST00000185984.1,ENSMUST00000159344.1,ENSMUST00000190958.1	55,1,6,1,28,24,31,1,7,1	15676,5086,1124,2676,4515,3512,4969,3217,729,2261	142053,0,12235,0,42059,55876,66183,0,12430,0	7437,5086,580,2676,560,487,575,3217,140,2261	12750,0,4112,0,4868,17240,9280,0,3188,0	8013,0,0,0,0,0,2192,0,0,0	2,-1,-1,-1,-1,-1,-1,-1,-1,-1
ENSMUSG00000100516.1	chr1	60267402	60267628	-	227	0	0	0	0	0	0	0	0	0	Gm29332	ENSMUSG00000100516.1	1	ENSMUST00000190829.1	1	226	0	226	0	0	3
ENSMUSG00000049439.13	chr1	60343323	60388060	+	2286	3941	4683	3801	3797	4086	4595	4802	5182	5364	Cyp20a1	ENSMUSG00000049439.13	3	ENSMUST00000114202.7,ENSMUST00000060608.12,ENSMUST00000148443.2	8,13,12	968,2210,2044	28416,42527,42693	167,921,921	8664,8664,8664	0,1376,132	-1,1,1
ENSMUSG00000103822.1	chr1	60353119	60354176	+	1058	31	15	12	18	28	10	14	34	19	6030460B20Rik	ENSMUSG00000103822.1	1	ENSMUST00000191764.1	1	1057	0	1057	0	0	-1
ENSMUSG00000026782.15	chr1	60409619	60481158	+	8543	17611	19332	16225	16656	18086	17921	19705	19121	21454	Abi2	ENSMUSG00000026782.15	12	ENSMUST00000052332.14,ENSMUST00000188594.6,ENSMUST00000188618.6,ENSMUST00000189980.6,ENSMUST00000191493.1,ENSMUST00000189082.6,ENSMUST00000187709.6,ENSMUST00000189649.1,ENSMUST00000185788.6,ENSMUST00000187400.6,ENSMUST00000186097.6,ENSMUST00000190158.1	9,9,12,11,4,5,10,2,8,6,10,8	5759,1649,4711,4104,3001,458,1661,360,1918,757,1346,1395	65780,65744,66752,65680,31996,37051,65694,24324,38757,38956,38525,36967	4418,348,3155,2778,1903,176,418,249,1018,180,343,564	24324,24324,24324,24324,24324,27137,24324,24324,16904,16904,10767,10767	1332,1368,1452,1432,0,0,1418,0,1075,752,1178,1006	1,1,1,1,-1,1,1,-1,-1,-1,-1,-1
ENSMUSG00000026014.15	chr1	60482292	60567104	-	20498	3823	4215	3728	3868	4202	4924	3373	4290	4251	Raph1	ENSMUSG00000026014.15	8	ENSMUST00000140485.7,ENSMUST00000182085.7,ENSMUST00000027168.11,ENSMUST00000090293.10,ENSMUST00000188511.1,ENSMUST00000189383.1,ENSMUST00000127573.2,ENSMUST00000142258.2	14,6,16,16,3,1,1,4	10010,695,2225,2393,533,1662,8482,686	74477,15670,81304,73700,2425,0,0,40730	8029,155,508,508,357,1662,8482,412	33159,10198,33159,33159,1735,0,0,33648	0,53,0,0,0,0,0,0	14,6,16,16,5,3,3,6
ENSMUSG00000081562.1	chr1	60522839	60523066	-	228	19	25	20	28	10	18	11	10	33	Gm11575	ENSMUSG00000081562.1	1	ENSMUST00000122243.1	1	227	0	227	0	0	3
ENSMUSG00000084400.1	chr1	60537020	60537436	+	417	0	0	0	0	0	0	0	0	0	Gm11576	ENSMUSG00000084400.1	1	ENSMUST00000117433.1	1	416	0	416	0	0	-1
ENSMUSG00000082160.1	chr1	60592251	60592709	-	459	9	28	8	15	17	9	4	7	18	Gm11578	ENSMUSG00000082160.1	1	ENSMUST00000118530.1	1	458	0	458	0	0	3
ENSMUSG00000103215.1	chr1	60594807	60596236	-	1430	0	0	0	2	0	0	0	0	0	Gm38388	ENSMUSG00000103215.1	1	ENSMUST00000195569.1	1	1429	0	1429	0	0	3
ENSMUSG00000088973.1	chr1	60613698	60613803	-	106	0	0	0	0	0	0	0	0	0	Gm23762	ENSMUSG00000088973.1	1	ENSMUST00000158348.1	1	105	0	105	0	0	3
ENSMUSG00000084151.1	chr1	60700872	60701937	+	737	0	0	0	0	0	0	0	0	0	Gm11577	ENSMUSG00000084151.1	1	ENSMUST00000118030.1	2	735	330	557	330	0	-1
ENSMUSG00000101188.1	chr1	60703932	60705149	+	1218	1412	1578	1119	1695	1399	1537	1226	1310	1600	Eif4a-ps4	ENSMUSG00000101188.1	1	ENSMUST00000122226.1	1	1217	0	1217	0	0	-1
ENSMUSG00000026012.2	chr1	60716800	60773359	+	6122	19	28	26	16	33	39	9	29	31	Cd28	ENSMUSG00000026012.2	3	ENSMUST00000132833.1,ENSMUST00000027165.2,ENSMUST00000153207.1	4,4,2	665,4343,1773	45698,22658,16451	201,3702,1647	42402,16451,16451	0,653,0	-1,1,-1
ENSMUSG00000086795.1	chr1	60776665	60781834	-	845	0	0	0	0	0	0	0	0	0	Gm11579	ENSMUSG00000086795.1	1	ENSMUST00000145502.1	2	843	4326	559	4326	0	4
ENSMUSG00000085965.1	chr1	60778843	60803790	+	388	0	0	1	0	0	1	0	0	0	2310016D23Rik	ENSMUSG00000085965.1	1	ENSMUST00000130082.1	4	384	24563	168	19028	0	-1
ENSMUSG00000104069.1	chr1	60779352	60781461	+	2110	0	0	0	0	0	0	0	0	0	Gm37198	ENSMUSG00000104069.1	1	ENSMUST00000195593.1	1	2109	0	2109	0	0	-1
ENSMUSG00000083118.1	chr1	60792490	60793832	+	793	0	0	0	0	0	0	0	0	0	Gm11609	ENSMUSG00000083118.1	1	ENSMUST00000121926.1	2	791	551	591	551	0	-1
ENSMUSG00000083355.1	chr1	60809116	60809942	+	763	2	4	0	2	0	1	7	0	0	Gm11581	ENSMUSG00000083355.1	1	ENSMUST00000122024.1	2	761	65	606	65	0	-1
ENSMUSG00000102549.1	chr1	60880338	60881738	+	1401	7	2	0	0	6	5	0	0	0	Gm38137	ENSMUSG00000102549.1	1	ENSMUST00000193735.1	1	1400	0	1400	0	0	-1
ENSMUSG00000026011.13	chr1	60887000	60915832	+	2330	0	0	0	0	0	0	1	0	5	Ctla4	ENSMUSG00000026011.13	3	ENSMUST00000124816.1,ENSMUST00000027164.8,ENSMUST00000097720.3	4,4,3	687,1929,611	25029,4878,4987	293,1219,347	11802,3144,3144	0,668,522	-1,1,1
ENSMUSG00000081382.1	chr1	60900898	60901422	+	525	35	76	52	51	44	47	38	73	73	Rpl18-ps1	ENSMUSG00000081382.1	1	ENSMUST00000121555.1	1	524	0	524	0	0	-1
ENSMUSG00000080800.1	chr1	60948230	60948465	-	236	0	0	0	6	0	0	0	0	0	Gm11582	ENSMUSG00000080800.1	1	ENSMUST00000121041.1	1	235	0	235	0	0	3
ENSMUSG00000026009.14	chr1	60977927	61000320	+	3430	4	2	0	3	4	5	0	8	1	Icos	ENSMUSG00000026009.14	2	ENSMUST00000027162.11,ENSMUST00000102827.3	4,5	806,3236	17064,19157	338,2619	15686,15686	668,598	1,1
ENSMUSG00000102561.1	chr1	60989479	60991963	+	2485	0	1	0	0	1	0	0	0	0	Gm37039	ENSMUSG00000102561.1	1	ENSMUST00000193733.1	1	2484	0	2484	0	0	-1
ENSMUSG00000082804.3	chr1	61075674	61076225	+	552	1	6	5	14	7	9	2	9	6	Rpl17-ps1	ENSMUSG00000082804.3	1	ENSMUST00000119156.1	1	551	0	551	0	0	-1
ENSMUSG00000082661.1	chr1	61121378	61124004	-	1455	0	0	2	0	0	0	0	0	0	Gm11590	ENSMUSG00000082661.1	1	ENSMUST00000118999.1	3	1452	1174	745	637	0	5
ENSMUSG00000080785.1	chr1	61196541	61197242	-	702	0	0	0	0	0	0	0	0	0	Gm11591	ENSMUSG00000080785.1	1	ENSMUST00000120063.1	1	701	0	701	0	0	3
ENSMUSG00000100893.1	chr1	61265291	61271514	-	538	0	0	0	7	0	0	0	0	1	Gm28083	ENSMUSG00000100893.1	1	ENSMUST00000186533.1	2	536	5687	350	5687	0	4
ENSMUSG00000085248.2	chr1	61301909	61307746	+	1120	5	3	3	9	8	0	0	3	23	Gm11587	ENSMUSG00000085248.2	1	ENSMUST00000128274.2	4	1116	4721	683	4110	0	-1
ENSMUSG00000085447.1	chr1	61378432	61395904	+	892	3	2	4	7	1	6	2	0	3	9530026F06Rik	ENSMUSG00000085447.1	1	ENSMUST00000141000.1	5	887	16585	273	13879	0	-1
ENSMUSG00000086408.1	chr1	61440101	61469475	+	658	0	0	0	0	0	0	0	0	0	Gm11588	ENSMUSG00000086408.1	1	ENSMUST00000141758.1	3	655	28719	377	18639	0	-1
ENSMUSG00000089546.1	chr1	61470441	61470543	+	103	0	0	0	0	0	0	0	0	0	Gm25839	ENSMUSG00000089546.1	1	ENSMUST00000158921.1	1	102	0	102	0	0	-1
ENSMUSG00000100965.1	chr1	61474951	61476028	+	506	0	0	0	3	0	0	0	0	0	Gm28449	ENSMUSG00000100965.1	1	ENSMUST00000187655.1	2	504	573	366	573	0	-1
ENSMUSG00000102168.1	chr1	61545882	61546163	+	282	0	0	0	0	0	0	0	0	0	Gm36943	ENSMUSG00000102168.1	1	ENSMUST00000194422.1	1	281	0	281	0	0	-1
ENSMUSG00000100381.1	chr1	61548122	61548511	+	390	0	0	0	0	0	0	0	0	0	Gm28094	ENSMUSG00000100381.1	1	ENSMUST00000185262.1	1	389	0	389	0	0	-1
ENSMUSG00000086009.1	chr1	61616943	61621149	-	851	0	0	0	0	0	0	0	0	0	4930587A21Rik	ENSMUSG00000086009.1	1	ENSMUST00000128588.1	2	849	3357	537	3357	0	4
ENSMUSG00000052062.14	chr1	61638824	62642284	+	13153	2231	3310	3105	2888	2453	3230	552	775	761	Pard3b	ENSMUSG00000052062.14	6	ENSMUST00000138768.7,ENSMUST00000075374.9,ENSMUST00000129030.1,ENSMUST00000188325.1,ENSMUST00000046673.10,ENSMUST00000094906.3	5,23,2,10,22,22	1052,8369,2398,4598,3404,7654	438383,995091,128586,525815,995276,995387	538,4718,1911,2945,358,4718	242258,242258,128586,242258,242258,242258	0,3589,0,0,3404,3293	-1,1,-1,-1,1,1
ENSMUSG00000103656.1	chr1	61654423	61657158	+	2736	86	122	47	120	76	80	69	106	105	Gm37205	ENSMUSG00000103656.1	1	ENSMUST00000194820.1	1	2735	0	2735	0	0	-1
ENSMUSG00000104402.1	chr1	61677249	61680277	+	3029	25	39	51	31	46	66	38	41	68	Gm38012	ENSMUSG00000104402.1	1	ENSMUST00000193022.1	1	3028	0	3028	0	0	-1
ENSMUSG00000104081.1	chr1	61702527	61703891	+	1365	6	6	8	7	13	4	2	5	2	Gm38278	ENSMUSG00000104081.1	1	ENSMUST00000194715.1	1	1364	0	1364	0	0	-1
ENSMUSG00000085842.7	chr1	61767415	61851540	-	1984	1	0	5	0	0	0	3	5	0	Pard3bos1	ENSMUSG00000085842.7	2	ENSMUST00000138535.7,ENSMUST00000130699.1	5,3	1873,730	82174,64066	1115,406	61467,61467	0,0	7,5
ENSMUSG00000103002.1	chr1	61805221	61806140	+	920	10	29	20	21	30	11	7	23	23	Gm38075	ENSMUSG00000103002.1	1	ENSMUST00000191979.1	1	919	0	919	0	0	-1
ENSMUSG00000100344.1	chr1	61980930	61981207	-	278	0	0	0	0	0	0	0	0	0	Gm29640	ENSMUSG00000100344.1	1	ENSMUST00000187972.1	1	277	0	277	0	0	3
ENSMUSG00000101509.1	chr1	62095081	62095339	-	259	0	0	0	0	0	0	0	0	0	Gm29641	ENSMUSG00000101509.1	1	ENSMUST00000188955.1	1	258	0	258	0	0	3
ENSMUSG00000085019.2	chr1	62131195	62136109	-	770	0	1	0	0	0	0	0	0	0	Pard3bos2	ENSMUSG00000085019.2	1	ENSMUST00000127498.2	3	767	4147	485	2213	0	5
ENSMUSG00000102359.1	chr1	62247153	62249670	+	2518	8	8	11	15	9	25	3	2	8	Gm38351	ENSMUSG00000102359.1	1	ENSMUST00000195466.1	1	2517	0	2517	0	0	-1
ENSMUSG00000085400.1	chr1	62456725	62499261	-	862	0	0	0	0	0	0	0	0	0	Pard3bos3	ENSMUSG00000085400.1	1	ENSMUST00000147177.1	2	860	41676	691	41676	0	4
ENSMUSG00000100750.1	chr1	62534491	62535942	-	1452	2	0	2	3	4	1	2	2	4	Gm29084	ENSMUSG00000100750.1	1	ENSMUST00000185587.1	1	1451	0	1451	0	0	3
ENSMUSG00000081950.1	chr1	62656695	62657788	-	240	0	0	0	0	0	2	0	1	0	Gm11600	ENSMUSG00000081950.1	1	ENSMUST00000119592.1	2	238	855	188	855	0	4
ENSMUSG00000084333.1	chr1	62660839	62661716	+	878	13	9	8	6	12	11	9	9	5	Gm11599	ENSMUSG00000084333.1	1	ENSMUST00000118720.1	1	877	0	877	0	0	-1
ENSMUSG00000025969.15	chr1	62703285	62818695	+	11842	11601	15013	13127	10567	11379	15602	8864	10179	13316	Nrp2	ENSMUSG00000025969.15	7	ENSMUST00000126344.1,ENSMUST00000102822.8,ENSMUST00000075144.11,ENSMUST00000027112.12,ENSMUST00000114155.7,ENSMUST00000063594.12,ENSMUST00000114157.2	3,16,16,16,16,17,17	2812,6692,6707,4200,6518,6325,6340	33835,108718,108703,89079,89094,108668,108653	1643,3362,3362,1272,3605,3362,3362	19182,29032,29017,19182,19182,26233,26218	0,2714,2729,2705,2690,2764,2779	-1,1,1,1,1,1,1
ENSMUSG00000100811.1	chr1	62714723	62718073	-	733	0	0	0	0	0	0	1	2	0	Gm29083	ENSMUSG00000100811.1	1	ENSMUST00000189205.1	2	731	2619	616	2619	0	4
ENSMUSG00000103032.1	chr1	62809302	62811857	+	2556	25	17	22	38	15	22	22	46	26	Gm37121	ENSMUSG00000103032.1	1	ENSMUST00000192219.1	1	2555	0	2555	0	0	-1
ENSMUSG00000100426.1	chr1	62821355	62832370	-	871	0	0	2	0	0	0	1	0	0	Gm4208	ENSMUSG00000100426.1	1	ENSMUST00000189802.1	2	869	10146	597	10146	0	4
ENSMUSG00000040865.15	chr1	62958418	63114667	-	17713	4381	5074	4612	3863	4888	5607	3968	4508	4711	Ino80d	ENSMUSG00000040865.15	7	ENSMUST00000133236.7,ENSMUST00000165066.7,ENSMUST00000172416.7,ENSMUST00000097718.8,ENSMUST00000188100.1,ENSMUST00000137511.7,ENSMUST00000153992.1	13,12,12,11,1,10,10	3612,13517,13426,13664,3426,1969,1785	129899,52949,53040,53202,0,50215,50306	1180,11344,11344,11344,3426,730,730	76585,11926,11926,20631,0,11926,11926	0,0,0,0,0,0,0	9,12,12,11,3,12,12
ENSMUSG00000104991.1	chr1	63025742	63025846	+	105	0	0	0	0	0	0	0	0	0	Gm44468	ENSMUSG00000104991.1	1	ENSMUST00000199516.1	1	104	0	104	0	0	-1
ENSMUSG00000088953.1	chr1	63032706	63032819	+	114	0	0	0	0	0	0	0	0	0	Gm24942	ENSMUSG00000088953.1	1	ENSMUST00000158328.1	1	113	0	113	0	0	-1
ENSMUSG00000081617.1	chr1	63038214	63038581	+	368	0	0	0	0	0	0	0	0	0	Rps13-ps7	ENSMUSG00000081617.1	1	ENSMUST00000122045.1	1	367	0	367	0	0	-1
ENSMUSG00000081429.1	chr1	63073774	63074019	+	246	0	3	0	0	0	0	0	0	0	Rps27-ps1	ENSMUSG00000081429.1	1	ENSMUST00000118179.1	1	245	0	245	0	0	-1
ENSMUSG00000084799.7	chr1	63113078	63158290	+	2880	312	333	325	211	306	317	190	180	269	Ino80dos	ENSMUSG00000084799.7	4	ENSMUST00000186436.1,ENSMUST00000186786.1,ENSMUST00000138611.7,ENSMUST00000188602.1	2,1,4,4	650,1235,1572,674	1232,0,42247,41831	509,1235,1332,287	1232,0,29575,29159	0,0,0,0	-1,-1,-1,-1
ENSMUSG00000101599.1	chr1	63117118	63126837	+	9720	714	749	587	1036	731	761	676	674	881	Gm20342	ENSMUSG00000101599.1	1	ENSMUST00000185480.1	1	9719	0	9719	0	0	-1
ENSMUSG00000025968.16	chr1	63143596	63176833	-	8086	32843	39056	31224	33278	33505	35498	30827	32964	36431	Ndufs1	ENSMUSG00000025968.16	13	ENSMUST00000190095.1,ENSMUST00000027111.14,ENSMUST00000187835.1,ENSMUST00000187756.6,ENSMUST00000168099.8,ENSMUST00000185847.1,ENSMUST00000186569.1,ENSMUST00000185827.6,ENSMUST00000140612.1,ENSMUST00000188370.6,ENSMUST00000185732.6,ENSMUST00000185412.6,ENSMUST00000189664.1	1,19,3,4,19,5,1,12,10,6,7,5,4	1365,2642,823,489,2571,650,2609,1763,1912,510,644,363,328	0,30584,3296,3213,30426,25947,0,18223,15853,12341,11008,7177,5652	1365,326,433,233,304,188,2609,594,962,130,238,96,103	0,5672,3198,2564,5514,20143,0,4329,5672,5672,4723,5514,4171	0,0,0,305,0,0,0,0,0,0,0,0,0	3,19,5,3,19,7,3,14,12,8,9,7,6
ENSMUSG00000077884.2	chr1	63161855	63161943	+	89	0	0	0	0	0	1	0	0	0	Gm24557	ENSMUSG00000077884.2	1	ENSMUST00000104692.2	1	88	0	88	0	0	-1
ENSMUSG00000025967.16	chr1	63176825	63180486	+	2532	124540	149653	117638	116185	124816	129061	133493	136523	154967	Eef1b2	ENSMUSG00000025967.16	9	ENSMUST00000129339.7,ENSMUST00000142062.7,ENSMUST00000188524.1,ENSMUST00000148553.1,ENSMUST00000135877.7,ENSMUST00000027108.12,ENSMUST00000126469.1,ENSMUST00000174890.8,ENSMUST00000126795.2	6,5,5,3,6,6,2,5,4	1933,477,676,383,685,796,813,637,798	1728,1756,1850,995,1738,1681,463,1057,877	1028,162,198,160,153,164,669,236,542	563,576,1148,563,563,547,463,463,463	672,129,550,0,204,145,0,204,280	1,1,1,-1,1,1,-1,1,-1
ENSMUSG00000098850.1	chr1	63177983	63178158	+	176	78	61	21	126	60	60	29	118	35	Gm27390	ENSMUSG00000098850.1	1	ENSMUST00000184516.1	1	175	0	175	0	0	-1
ENSMUSG00000064612.2	chr1	63178677	63178754	+	78	70	81	40	84	38	31	66	60	92	Gm26457	ENSMUSG00000064612.2	1	ENSMUST00000082678.2	1	77	0	77	0	0	-1
ENSMUSG00000105060.1	chr1	63178686	63178720	+	35	53	62	34	58	38	31	59	49	74	Gm26457	ENSMUSG00000105060.1	1	ENSMUST00000199062.1	1	34	0	34	0	0	-1
ENSMUSG00000064602.1	chr1	63179004	63179135	+	132	21	57	18	26	32	22	19	29	11	Snora41	ENSMUSG00000064602.1	1	ENSMUST00000082668.1	1	131	0	131	0	0	-1
ENSMUSG00000046856.13	chr1	63182691	63214543	-	2496	6	5	5	5	2	2	3	1	6	Gpr1	ENSMUSG00000046856.13	2	ENSMUST00000050536.13,ENSMUST00000187533.1	3,4	1937,758	29915,4723	1413,424	25650,2450	-1057,0	3,6
ENSMUSG00000094290.2	chr1	63198031	63198156	+	126	0	0	0	0	0	0	0	0	0	Gm27512	ENSMUSG00000094290.2	1	ENSMUST00000175328.3	1	125	0	125	0	0	-1
ENSMUSG00000086730.2	chr1	63200313	63207967	+	911	0	0	0	0	0	0	0	0	0	Platr12	ENSMUSG00000086730.2	2	ENSMUST00000141027.1,ENSMUST00000189722.1	2,2	460,547	6841,6712	361,452	6841,6712	0,0	-1,-1
ENSMUSG00000102536.1	chr1	63248021	63248499	-	479	3	0	1	0	3	0	1	3	4	1700039I01Rik	ENSMUSG00000102536.1	1	ENSMUST00000194370.1	1	478	0	478	0	0	3
ENSMUSG00000087561.7	chr1	63266848	63273120	-	882	6	0	1	9	6	5	7	0	2	Gm11608	ENSMUSG00000087561.7	2	ENSMUST00000153049.7,ENSMUST00000151616.1	5,4	872,747	5395,5525	294,266	2319,2319	0,0	7,6
ENSMUSG00000092705.1	chr1	63273226	63273363	-	138	0	0	0	0	0	0	0	0	0	Gm24513	ENSMUSG00000092705.1	1	ENSMUST00000174964.1	1	137	0	137	0	0	3
ENSMUSG00000027520.15	chr1	63273265	63314576	+	12659	13322	16866	13444	9023	14051	17953	17034	19074	20939	Zdbf2	ENSMUSG00000027520.15	3	ENSMUST00000114132.7,ENSMUST00000126932.1,ENSMUST00000029025.8	7,5,3	12622,606,12109	28689,21147,11728	11936,203,11935	9800,9770,7594	7479,0,7479	5,4,1
ENSMUSG00000094214.1	chr1	63300280	63300383	-	104	0	0	0	0	0	0	0	0	0	Gm23448	ENSMUSG00000094214.1	1	ENSMUST00000083151.2	1	103	0	103	0	0	3
ENSMUSG00000083039.1	chr1	63357434	63358050	-	617	0	0	0	0	0	0	0	0	0	Gm11606	ENSMUSG00000083039.1	1	ENSMUST00000120706.1	1	616	0	616	0	0	3
ENSMUSG00000081643.1	chr1	63364720	63365365	-	646	6	9	4	10	13	4	6	10	11	Gm11605	ENSMUSG00000081643.1	1	ENSMUST00000120413.1	1	645	0	645	0	0	3
ENSMUSG00000025964.15	chr1	63445891	63596276	+	17907	1794	1752	1166	1318	1383	1469	942	828	1207	Adam23	ENSMUSG00000025964.15	12	ENSMUST00000182642.7,ENSMUST00000087374.9,ENSMUST00000114101.7,ENSMUST00000146403.7,ENSMUST00000114103.7,ENSMUST00000114107.2,ENSMUST00000190658.6,ENSMUST00000097717.8,ENSMUST00000185616.1,ENSMUST00000134704.2,ENSMUST00000187844.1,ENSMUST00000141545.2	24,26,22,6,25,26,10,24,1,6,1,2	2865,6400,3474,3532,2630,6084,730,5706,3506,642,3387,629	124461,143981,119710,83382,144071,143981,74209,96401,0,11094,0,7153	521,3668,1245,2614,304,3668,127,3668,3506,308,3387,432	37822,37822,37822,37822,37822,37822,37822,21289,0,5921,0,7153	0,2464,0,0,2465,2464,0,0,0,0,0,0	-1,1,-1,-1,1,1,-1,-1,-1,-1,-1,-1
ENSMUSG00000087823.1	chr1	63575488	63575590	-	103	0	0	0	0	0	0	0	0	0	Gm22281	ENSMUSG00000087823.1	1	ENSMUST00000157198.1	1	102	0	102	0	0	3
ENSMUSG00000069085.5	chr1	63622851	63686927	-	6143	5	0	1	4	2	1	0	5	0	Dytn	ENSMUSG00000069085.5	2	ENSMUST00000090313.4,ENSMUST00000126954.1	15,5	2412,4714	61664,17976	480,3999	11338,10012	0,0	15,7
ENSMUSG00000083066.1	chr1	63671468	63671971	+	504	0	0	0	0	0	0	0	0	0	Gm12748	ENSMUSG00000083066.1	1	ENSMUST00000120763.1	1	503	0	503	0	0	-1
ENSMUSG00000025963.5	chr1	63698819	63730318	-	1719	151	137	197	157	199	159	131	208	186	Mdh1b	ENSMUSG00000025963.5	1	ENSMUST00000114094.2	11	1708	29791	496	9474	0	11
ENSMUSG00000025962.15	chr1	63730614	63754655	+	5873	4639	5294	4079	4572	4933	5367	4582	5131	5657	Fastkd2	ENSMUSG00000025962.15	6	ENSMUST00000027103.6,ENSMUST00000148758.7,ENSMUST00000128621.7,ENSMUST00000131478.1,ENSMUST00000123945.1,ENSMUST00000134454.1	12,5,11,4,2,2	4474,2112,2602,638,739,325	19567,5094,19293,9705,1516,919	2358,821,821,204,590,168	6488,2511,6488,6488,1516,919	2059,0,0,0,0,0	2,-1,-1,-1,-1,-1
ENSMUSG00000025961.1	chr1	63754907	63769267	-	1758	0	0	2	4	1	2	0	0	6	4933402D24Rik	ENSMUSG00000025961.1	1	ENSMUST00000027102.1	3	1755	12605	1512	11966	0	3
ENSMUSG00000080817.1	chr1	63844827	63845578	-	752	0	0	0	0	0	0	0	0	0	Gm13751	ENSMUSG00000080817.1	1	ENSMUST00000120280.1	1	751	0	751	0	0	3
ENSMUSG00000082373.2	chr1	63917848	63935932	+	998	0	0	2	0	0	0	0	0	0	Gm13754	ENSMUSG00000082373.2	1	ENSMUST00000120486.2	9	989	17095	248	5720	0	-1
ENSMUSG00000044689.5	chr1	63964727	63968999	+	1432	0	0	0	2	0	0	0	0	0	Gm13749	ENSMUSG00000044689.5	1	ENSMUST00000133244.1	2	1430	2842	1359	2842	0	-1
ENSMUSG00000025959.13	chr1	64029447	64122282	-	8131	1549	1788	1572	1508	1569	1936	1560	1737	2368	Klf7	ENSMUSG00000025959.13	3	ENSMUST00000114086.7,ENSMUST00000055001.9,ENSMUST00000135075.1	4,4,3	7658,1473,550	84386,78083,42629	6317,627,239	41566,41566,41566	0,0,0	4,4,5
ENSMUSG00000097272.1	chr1	64029463	64032927	+	3196	0	0	0	0	0	0	0	0	0	Gm26649	ENSMUSG00000097272.1	1	ENSMUST00000181595.1	2	3194	270	2814	270	0	-1
ENSMUSG00000098487.1	chr1	64042438	64042501	-	64	11	7	2	3	5	0	2	4	6	Mir6899	ENSMUSG00000098487.1	1	ENSMUST00000184798.1	1	63	0	63	0	0	3
ENSMUSG00000086836.1	chr1	64078654	64090782	+	378	0	0	0	0	0	0	0	0	0	Gm13748	ENSMUSG00000086836.1	1	ENSMUST00000149820.1	4	374	11754	175	8961	0	-1
ENSMUSG00000086721.2	chr1	64150201	64150665	+	465	3	7	4	6	10	9	8	8	11	Gm13750	ENSMUSG00000086721.2	1	ENSMUST00000117621.1	1	464	0	464	0	0	-1
ENSMUSG00000101895.1	chr1	64185991	64303043	-	1288	0	0	6	0	4	0	0	0	7	Gm28981	ENSMUSG00000101895.1	1	ENSMUST00000190863.1	2	1286	115766	1250	115766	0	4
ENSMUSG00000093228.1	chr1	64396334	64396403	+	70	0	0	0	0	0	0	0	0	0	Gm25748	ENSMUSG00000093228.1	1	ENSMUST00000175487.1	1	69	0	69	0	0	-1
ENSMUSG00000099658.1	chr1	64454359	64454577	-	219	1	0	0	0	8	0	0	0	0	Gm28980	ENSMUSG00000099658.1	1	ENSMUST00000187877.1	1	218	0	218	0	0	3
ENSMUSG00000025958.14	chr1	64532645	64604548	+	13742	38509	44540	37637	35964	41001	43210	29461	33360	34686	Creb1	ENSMUSG00000025958.14	11	ENSMUST00000185594.6,ENSMUST00000171164.7,ENSMUST00000188855.6,ENSMUST00000187811.6,ENSMUST00000049932.11,ENSMUST00000087366.10,ENSMUST00000186335.6,ENSMUST00000190876.6,ENSMUST00000190348.1,ENSMUST00000187035.1,ENSMUST00000190979.1	8,7,3,8,9,8,7,10,9,1,1	1561,1280,657,1247,5000,8356,1281,1410,1251,1641,2762	63489,63494,25478,44160,63448,63373,41000,63198,63332,0,0	461,337,436,211,4023,7314,402,233,243,1641,2762	20905,25483,17945,17829,20905,20905,17829,20905,20905,0,0	977,858,0,947,1018,977,0,270,1018,0,0	2,2,-1,2,2,2,-1,2,2,-1,-1
ENSMUSG00000025956.10	chr1	64606473	64617242	-	3005	3059	3534	3101	2884	3292	3607	2733	3053	3097	Mettl21a	ENSMUSG00000025956.10	4	ENSMUST00000114079.8,ENSMUST00000053469.1,ENSMUST00000162806.7,ENSMUST00000161264.1	4,3,3,4	2026,2663,484,368	8743,8025,7191,2612	1664,1657,192,171	6961,6961,6961,1064	0,0,0,0	4,3,5,6
ENSMUSG00000101832.1	chr1	64617784	64626033	+	512	0	1	2	2	0	3	2	1	1	Gm28982	ENSMUSG00000101832.1	1	ENSMUST00000186895.1	4	508	7741	232	6060	0	-1
ENSMUSG00000100437.1	chr1	64649935	64652756	+	325	0	0	0	0	0	0	0	1	0	Gm29152	ENSMUSG00000100437.1	1	ENSMUST00000189284.1	3	322	2499	167	2394	0	-1
ENSMUSG00000087213.2	chr1	64679871	64690659	-	2341	254	288	150	207	181	225	153	164	118	2810408I11Rik	ENSMUSG00000087213.2	3	ENSMUST00000150749.1,ENSMUST00000122813.1,ENSMUST00000186325.1	2,4,1	709,431,1504	10079,6829,0	514,144,1504	10079,2886,0	0,0,0	4,6,3
ENSMUSG00000070871.10	chr1	64690455	64725644	+	3456	976	1051	903	997	1011	1210	878	1175	1216	Ccnyl1	ENSMUSG00000070871.10	4	ENSMUST00000114077.7,ENSMUST00000187170.6,ENSMUST00000187638.6,ENSMUST00000094898.4	11,11,5,10	3270,1495,460,2913	31919,31629,19810,31382	2121,423,217,2117	9569,9569,9569,9569	1093,866,0,866	1,2,1,1
ENSMUSG00000045005.9	chr1	64730558	64737751	-	6915	459	462	213	208	151	284	528	607	530	Fzd5	ENSMUSG00000045005.9	2	ENSMUST00000063982.6,ENSMUST00000116133.3	2,2	6913,2893	280,387	6295,2384	280,387	-1753,-1753	2,2
ENSMUSG00000102140.1	chr1	64736240	64740607	+	4368	8	4	8	10	3	0	7	9	7	Gm38058	ENSMUSG00000102140.1	1	ENSMUST00000194323.1	1	4367	0	4367	0	0	-1
ENSMUSG00000051344.13	chr1	64785983	64956824	-	10921	1244	1370	1165	1173	1243	1371	1146	1351	1490	Plekhm3	ENSMUSG00000051344.13	6	ENSMUST00000139649.7,ENSMUST00000097713.1,ENSMUST00000187188.1,ENSMUST00000140857.1,ENSMUST00000123225.1,ENSMUST00000134097.1	9,8,3,5,2,2	4227,8554,1656,2286,678,656	166614,159149,41299,65513,18076,2908	1162,6093,1405,952,518,624	41094,41094,24722,28653,18076,2908	0,0,0,0,0,0	8,8,5,7,4,4
ENSMUSG00000097264.1	chr1	64934402	64934780	+	379	0	0	0	0	0	0	0	1	0	Rpl31-ps24	ENSMUSG00000097264.1	1	ENSMUST00000181350.1	1	378	0	378	0	0	-1
ENSMUSG00000084416.3	chr1	64993951	64994604	-	654	709	779	506	617	735	668	485	649	608	Rpl10a-ps1	ENSMUSG00000084416.3	1	ENSMUST00000120360.1	1	653	0	653	0	0	3
ENSMUSG00000077471.1	chr1	65001307	65001462	-	156	0	0	0	0	0	0	0	0	0	Gm24788	ENSMUSG00000077471.1	1	ENSMUST00000104283.1	1	155	0	155	0	0	3
ENSMUSG00000025955.13	chr1	65012689	65032759	-	4209	9	8	10	3	20	16	8	18	14	Akr1cl	ENSMUSG00000025955.13	6	ENSMUST00000162800.7,ENSMUST00000069142.11,ENSMUST00000159896.1,ENSMUST00000159566.1,ENSMUST00000161313.1,ENSMUST00000160283.1	9,10,2,8,3,2	1619,1751,765,961,1154,1323	18439,18319,1308,15657,3893,1898	620,620,476,167,888,1161	6856,4838,1308,4838,1995,1898	0,0,0,0,0,0	9,10,4,6,5,4
ENSMUSG00000090042.1	chr1	65028080	65028732	+	653	2	1	1	0	2	3	0	0	1	Gm8550	ENSMUSG00000090042.1	1	ENSMUST00000161621.1	1	652	0	652	0	0	-1
ENSMUSG00000070870.6	chr1	65048554	65051149	-	723	3	0	3	3	0	0	0	0	0	Cryge	ENSMUSG00000070870.6	2	ENSMUST00000087359.5,ENSMUST00000161960.1	3,2	628,688	1967,1874	342,349	1874,1874	0,0	3,2
ENSMUSG00000067299.11	chr1	65061872	65063452	-	1028	0	0	0	0	0	0	0	0	0	Crygd	ENSMUSG00000067299.11	3	ENSMUST00000045028.14,ENSMUST00000146122.1,ENSMUST00000127762.1	3,2,2	610,328,628	970,628,93	310,242,570	877,628,93	0,0,0	3,4,4
ENSMUSG00000025952.15	chr1	65071525	65073689	-	786	0	0	0	3	0	0	0	0	0	Crygc	ENSMUSG00000025952.15	2	ENSMUST00000027089.14,ENSMUST00000114064.2	3,3	780,609	1384,1381	346,343	1291,1288	0,0	3,3
ENSMUSG00000073658.4	chr1	65080219	65082288	-	634	4	1	0	0	0	0	0	0	4	Crygb	ENSMUSG00000073658.4	1	ENSMUST00000027090.8	3	631	1438	348	1348	0	3
ENSMUSG00000100774.1	chr1	65095227	65095436	+	210	0	0	1	1	0	0	0	1	0	Gm7329	ENSMUSG00000100774.1	1	ENSMUST00000185915.1	1	209	0	209	0	0	-1
ENSMUSG00000044429.8	chr1	65100389	65103373	-	730	0	0	0	0	0	0	8	0	0	Cryga	ENSMUSG00000044429.8	2	ENSMUST00000154012.1,ENSMUST00000061497.8	2,3	715,622	2256,2362	379,336	2256,2256	0,0	4,3
ENSMUSG00000100846.1	chr1	65100619	65119558	-	733	11	16	20	6	17	6	32	7	9	Gm28845	ENSMUSG00000100846.1	1	ENSMUST00000144760.2	7	726	18213	242	6717	90	7
ENSMUSG00000044816.10	chr1	65105285	65123214	-	2667	31	33	39	22	37	37	53	32	52	D630023F18Rik	ENSMUSG00000044816.10	3	ENSMUST00000148020.7,ENSMUST00000050047.3,ENSMUST00000153330.2	8,8,7	1148,2172,587	16781,13708,13808	465,1492,114	6717,6717,6717	0,0,0	8,8,4
ENSMUSG00000025950.16	chr1	65158616	65186500	-	2771	55962	63105	53714	59240	57696	59717	45265	47258	54973	Idh1	ENSMUSG00000025950.16	7	ENSMUST00000097709.10,ENSMUST00000169032.7,ENSMUST00000188109.6,ENSMUST00000188876.6,ENSMUST00000149310.7,ENSMUST00000186222.6,ENSMUST00000191459.1	9,9,5,6,4,4,4	2293,2274,751,838,495,569,368	18272,25587,19488,19418,6480,14770,10815	939,937,291,291,291,250,174	3981,10937,10937,6260,3981,6394,4607	0,0,0,0,0,0,0	9,9,7,8,6,6,6
ENSMUSG00000025949.16	chr1	65186683	65278695	+	19211	19125	22757	21038	19339	21788	23498	14911	18197	19036	Pikfyve	ENSMUSG00000025949.16	11	ENSMUST00000185317.6,ENSMUST00000190058.6,ENSMUST00000188799.6,ENSMUST00000187579.1,ENSMUST00000189925.6,ENSMUST00000081154.13,ENSMUST00000213081.1,ENSMUST00000186404.6,ENSMUST00000185263.6,ENSMUST00000097707.4,ENSMUST00000190847.1	7,19,11,2,8,42,10,13,4,42,4	1037,3258,4072,2248,1295,11195,1780,4253,439,6599,647	17986,56951,35352,3541,18183,80798,20915,42327,5035,80663,18855	207,836,2612,2164,299,5052,616,2490,180,1156,328	5933,10256,10256,3541,5933,10256,5933,10256,3486,10256,10256	0,473,0,0,0,6118,0,0,199,6253,0	-1,2,-1,-1,-1,2,-1,-1,2,2,-1
ENSMUSG00000025946.13	chr1	65282056	65389244	+	2582	30	46	16	37	30	25	20	24	45	Pth2r	ENSMUSG00000025946.13	2	ENSMUST00000140190.7,ENSMUST00000027083.6	6,13	625,2401	62660,75586	167,826	39746,14677	0,1628	1,1
ENSMUSG00000100503.1	chr1	65420850	65421121	-	272	0	0	0	0	0	0	0	0	0	Gm28927	ENSMUSG00000100503.1	1	ENSMUST00000191528.1	1	271	0	271	0	0	3
ENSMUSG00000100504.1	chr1	65421124	65421803	-	680	0	0	0	0	0	0	0	0	0	Gm28926	ENSMUSG00000100504.1	1	ENSMUST00000191063.1	1	679	0	679	0	0	3
ENSMUSG00000099383.1	chr1	65421770	65421937	-	168	0	0	0	0	0	0	0	0	0	Gm28925	ENSMUSG00000099383.1	1	ENSMUST00000188586.1	1	167	0	167	0	0	3
ENSMUSG00000100340.1	chr1	65438664	65438985	-	322	0	0	0	0	0	0	0	0	0	Gm28923	ENSMUSG00000100340.1	1	ENSMUST00000187755.1	1	321	0	321	0	0	3
ENSMUSG00000100439.1	chr1	65470201	65470508	-	308	0	0	0	0	0	0	0	0	0	Gm28922	ENSMUSG00000100439.1	1	ENSMUST00000189785.1	1	307	0	307	0	0	3
ENSMUSG00000099819.1	chr1	65523671	65524075	-	405	0	0	0	0	0	0	0	0	0	Gm28728	ENSMUSG00000099819.1	1	ENSMUST00000189087.1	1	404	0	404	0	0	3
ENSMUSG00000082565.1	chr1	65550464	65551237	-	642	0	0	0	0	0	0	0	0	0	Gm5255	ENSMUSG00000082565.1	1	ENSMUST00000120125.1	2	640	133	572	133	0	4
ENSMUSG00000082774.1	chr1	65552682	65552994	+	313	2	3	0	0	2	0	0	0	0	Gm8805	ENSMUSG00000082774.1	1	ENSMUST00000117848.1	1	312	0	312	0	0	-1
ENSMUSG00000025945.11	chr1	65926520	65928307	+	627	0	0	0	0	0	0	0	0	0	Crygf	ENSMUSG00000025945.11	2	ENSMUST00000027082.10,ENSMUST00000114027.2	3,3	624,591	1163,1177	336,321	1081,1095	522,342	1,1
ENSMUSG00000081623.1	chr1	66032183	66032925	-	743	0	0	0	0	0	0	0	0	0	Gm8809	ENSMUSG00000081623.1	1	ENSMUST00000119367.1	1	742	0	742	0	0	3
ENSMUSG00000083242.1	chr1	66033085	66033425	+	341	0	2	0	0	1	1	0	0	0	Gm15659	ENSMUSG00000083242.1	1	ENSMUST00000118881.1	1	340	0	340	0	0	-1
ENSMUSG00000083289.1	chr1	66062965	66063376	+	412	0	0	0	0	0	0	0	0	0	Gm8812	ENSMUSG00000083289.1	1	ENSMUST00000118496.1	1	411	0	411	0	0	-1
ENSMUSG00000015222.17	chr1	66175273	66442583	+	16449	115059	140913	129250	132781	132261	137805	107906	118223	164555	Map2	ENSMUSG00000015222.17	24	ENSMUST00000156636.8,ENSMUST00000114017.7,ENSMUST00000114015.7,ENSMUST00000124873.7,ENSMUST00000125844.1,ENSMUST00000114018.9,ENSMUST00000024639.11,ENSMUST00000114013.7,ENSMUST00000128673.7,ENSMUST00000137807.7,ENSMUST00000123647.7,ENSMUST00000077355.11,ENSMUST00000114012.7,ENSMUST00000173855.7,ENSMUST00000141148.1,ENSMUST00000151423.8,ENSMUST00000145419.7,ENSMUST00000127388.7,ENSMUST00000174590.…	5,15,14,4,3,13,12,15,6,4,5,10,10,5,4,9,4,4,3,6,8,9,6,3	541,4966,5426,374,416,5290,5183,6243,3531,1087,748,5115,5109,1690,781,2206,2191,2334,301,843,1001,1135,716,693	204803,261749,261841,146594,19412,185644,185736,111226,78764,58206,78636,72813,72816,31199,31447,50805,25082,18953,14263,9400,21192,21058,20774,5185	222,3236,3791,227,206,3789,3789,3740,2687,802,284,3791,3791,994,523,1164,1844,2061,131,307,331,331,331,575	76167,70692,70692,70692,17421,70692,70692,39735,39735,39735,39869,18616,18616,18616,18616,18614,12254,12321,12321,3407,5999,5999,7986,4659	0,1487,1395,0,0,1487,1395,5475,0,0,0,1395,1392,0,0,0,0,0,0,0,0,0,0,392	5,6,6,-1,-1,4,4,4,-1,-1,3,2,2,1,-1,-1,4,-1,-1,-1,-1,-1,-1,-1
ENSMUSG00000088850.1	chr1	66305889	66306025	+	137	8	23	2	31	25	18	36	28	27	Gm24729	ENSMUSG00000088850.1	1	ENSMUST00000158225.1	1	136	0	136	0	0	-1
ENSMUSG00000073656.4	chr1	66322276	66328796	-	1661	4	1	0	9	1	0	7	5	3	Gm10558	ENSMUSG00000073656.4	1	ENSMUST00000147494.1	3	1658	4862	1477	2514	0	5
ENSMUSG00000065694.1	chr1	66436082	66436232	+	151	33	30	26	44	29	39	19	38	25	Gm25411	ENSMUSG00000065694.1	1	ENSMUST00000083760.1	1	150	0	150	0	0	-1
ENSMUSG00000055567.17	chr1	66468367	66699866	+	15143	286	241	225	238	197	372	268	158	409	Unc80	ENSMUSG00000055567.17	6	ENSMUST00000061620.15,ENSMUST00000114008.2,ENSMUST00000136727.1,ENSMUST00000212557.1,ENSMUST00000187179.1,ENSMUST00000152844.1	65,8,6,64,1,6	14266,1110,1161,13983,586,1906	217233,35420,16599,217436,0,15058	4536,301,425,4536,586,1333	20193,17689,9709,20193,0,9221	9916,890,0,9713,0,839	1,1,-1,1,-1,-1
ENSMUSG00000103375.1	chr1	66690630	66692356	-	1727	0	0	2	5	0	0	0	1	1	Gm37181	ENSMUSG00000103375.1	1	ENSMUST00000192513.1	1	1726	0	1726	0	0	3
ENSMUSG00000026005.15	chr1	66700831	66719805	+	3113	10028	11600	9402	9510	10898	10611	9935	10448	11496	Rpe	ENSMUSG00000026005.15	5	ENSMUST00000151016.1,ENSMUST00000027157.9,ENSMUST00000113995.1,ENSMUST00000142920.7,ENSMUST00000190404.1	4,6,7,7,6	777,2686,2706,2717,753	13586,16288,16268,16257,16359	586,2051,2051,2051,265	8588,8052,8052,8052,12941	125,681,701,213,150	1,1,1,1,1
ENSMUSG00000026004.15	chr1	66719248	66817562	-	6664	4947	5425	4724	4487	5455	5885	4111	4764	4876	Kansl1l	ENSMUSG00000026004.15	5	ENSMUST00000129190.7,ENSMUST00000068168.9,ENSMUST00000113987.1,ENSMUST00000132960.1,ENSMUST00000189846.1	14,14,8,4,2	3456,4445,2334,2798,1598	78506,93738,79686,28998,15206	1758,1643,1119,1119,1426	23835,23835,23835,22941,15206	1530,0,0,0,0	14,14,8,6,4
ENSMUSG00000102559.1	chr1	66765626	66768731	-	3106	16	12	16	17	14	34	16	15	6	Gm37570	ENSMUSG00000102559.1	1	ENSMUST00000195411.1	1	3105	0	3105	0	0	3
ENSMUSG00000102374.1	chr1	66769290	66771866	-	2577	200	228	220	195	266	177	117	179	186	Gm38387	ENSMUSG00000102374.1	1	ENSMUST00000191945.1	1	2576	0	2576	0	0	3
ENSMUSG00000102776.1	chr1	66775511	66780107	+	4597	51	37	54	46	71	64	39	58	76	Gm38162	ENSMUSG00000102776.1	1	ENSMUST00000195562.1	1	4596	0	4596	0	0	-1
ENSMUSG00000082057.1	chr1	66783913	66786445	+	1359	19	17	6	3	16	12	15	11	47	Gm15789	ENSMUSG00000082057.1	1	ENSMUST00000118992.1	3	1356	1176	559	999	0	-1
ENSMUSG00000103706.1	chr1	66793645	66796298	-	2654	285	345	218	320	327	106	227	258	226	6820402A03Rik	ENSMUSG00000103706.1	1	ENSMUST00000194648.1	1	2653	0	2653	0	0	3
ENSMUSG00000103756.1	chr1	66799659	66800797	-	1139	71	68	28	47	86	38	35	85	48	Gm37285	ENSMUSG00000103756.1	1	ENSMUST00000194465.1	1	1138	0	1138	0	0	3
ENSMUSG00000103382.1	chr1	66812315	66814493	+	2179	0	0	8	1	4	0	0	0	0	Gm37755	ENSMUSG00000103382.1	1	ENSMUST00000195880.1	1	2178	0	2178	0	0	-1
ENSMUSG00000103553.1	chr1	66821226	66825914	-	4689	15	12	2	17	6	14	12	18	25	Gm38218	ENSMUSG00000103553.1	1	ENSMUST00000193555.1	1	4688	0	4688	0	0	3
ENSMUSG00000026003.5	chr1	66830839	66863277	-	2005	1222	1415	1190	1179	1181	1629	1674	1832	2066	Acadl	ENSMUSG00000026003.5	2	ENSMUST00000027153.5,ENSMUST00000139208.1	11,6	1905,643	30533,12389	688,164	5619,4661	0,0	11,8
ENSMUSG00000082769.3	chr1	66849108	66849602	-	495	9	2	5	2	9	7	4	7	11	Gm15793	ENSMUSG00000082769.3	1	ENSMUST00000121857.1	1	494	0	494	0	0	3
ENSMUSG00000089420.2	chr1	66856641	66856703	+	63	0	0	0	0	0	0	0	0	0	Gm27934	ENSMUSG00000089420.2	1	ENSMUST00000158795.2	1	62	0	62	0	0	-1
ENSMUSG00000077328.1	chr1	66866797	66866926	+	130	0	0	0	0	0	0	0	0	0	Gm25832	ENSMUSG00000077328.1	1	ENSMUST00000104140.1	1	129	0	129	0	0	-1
ENSMUSG00000061816.15	chr1	66924295	66945404	-	2074	8	10	19	45	13	17	5	9	15	Myl1	ENSMUSG00000061816.15	8	ENSMUST00000186202.6,ENSMUST00000027151.11,ENSMUST00000119429.7,ENSMUST00000150542.1,ENSMUST00000120415.7,ENSMUST00000160100.1,ENSMUST00000186346.1,ENSMUST00000151328.2	7,7,7,7,5,5,2,2	867,1075,796,560,616,566,317,660	10475,19773,10260,9767,8651,18196,4189,281	262,351,259,173,219,218,180,547	4189,10519,4189,3917,4189,10519,4189,281	0,0,0,0,0,0,0,0	6,6,6,9,5,7,4,4
ENSMUSG00000094191.1	chr1	66948563	66948940	-	378	2	6	1	3	7	0	1	2	2	Rpl31-ps14	ENSMUSG00000094191.1	1	ENSMUST00000143596.1	1	377	0	377	0	0	3
ENSMUSG00000082212.1	chr1	66951829	66953469	+	1384	0	0	0	0	0	0	0	0	0	Gm15826	ENSMUSG00000082212.1	1	ENSMUST00000121328.1	2	1382	258	1095	258	0	-1
ENSMUSG00000026000.16	chr1	67000517	67038872	-	6863	5437	6150	5683	5713	6062	6149	4902	5461	5699	Lancl1	ENSMUSG00000026000.16	6	ENSMUST00000027149.11,ENSMUST00000113979.9,ENSMUST00000119559.7,ENSMUST00000133508.1,ENSMUST00000149996.1,ENSMUST00000189210.1	10,9,10,3,5,1	4260,4452,1375,385,565,2609	34088,33903,34084,13662,28336,0	3040,3040,207,207,207,2609	13059,13059,13059,11484,13059,0	0,0,0,0,0,0	10,9,10,5,7,3
ENSMUSG00000025991.8	chr1	67123026	67231259	+	5555	24	1	19	7	7	17	15	17	18	Cps1	ENSMUSG00000025991.8	1	ENSMUST00000027144.7	38	5517	102716	1011	16467	4465	1
ENSMUSG00000086204.1	chr1	67249200	67323609	+	678	0	0	0	0	0	0	0	0	0	Gm15668	ENSMUSG00000086204.1	1	ENSMUST00000140506.1	5	673	73736	262	70808	0	-1
ENSMUSG00000077745.1	chr1	67257224	67257352	+	129	0	0	0	0	0	0	0	0	0	Gm26342	ENSMUSG00000077745.1	1	ENSMUST00000104557.1	1	128	0	128	0	0	-1
ENSMUSG00000082473.1	chr1	67585053	67587036	+	1984	1	0	0	0	0	0	0	0	0	Kif22-ps	ENSMUSG00000082473.1	1	ENSMUST00000119302.1	1	1983	0	1983	0	0	-1
ENSMUSG00000095282.1	chr1	67616975	67617052	+	78	0	0	0	0	0	0	0	0	0	Gm22548	ENSMUSG00000095282.1	1	ENSMUST00000174899.2	1	77	0	77	0	0	-1
ENSMUSG00000085075.1	chr1	67792481	67805324	+	526	0	0	0	0	0	0	0	0	0	Gm15669	ENSMUSG00000085075.1	1	ENSMUST00000147834.1	2	524	12319	316	12319	0	-1
ENSMUSG00000104395.1	chr1	67903230	67905532	+	2303	0	0	0	0	0	0	0	0	0	Gm37957	ENSMUSG00000104395.1	1	ENSMUST00000192182.1	1	2302	0	2302	0	0	-1
ENSMUSG00000096031.1	chr1	67973676	67973777	+	102	0	0	0	0	0	0	0	0	0	Gm23189	ENSMUSG00000096031.1	1	ENSMUST00000178954.1	1	101	0	101	0	0	-1
ENSMUSG00000087329.3	chr1	68024243	68025763	+	576	0	0	0	0	0	0	0	0	0	Gm15671	ENSMUSG00000087329.3	1	ENSMUST00000124160.3	3	573	947	419	636	0	-1
ENSMUSG00000062209.15	chr1	68032186	69108059	-	12355	2539	2131	2295	2150	2581	2183	485	601	607	Erbb4	ENSMUSG00000062209.15	5	ENSMUST00000119142.7,ENSMUST00000121473.7,ENSMUST00000153432.1,ENSMUST00000131148.1,ENSMUST00000126682.1	28,27,19,3,5	11754,12010,2177,237,739	1063816,1063863,854924,7926,31327	8300,8300,199,162,291	367142,367142,367142,7804,18341	0,0,0,0,0	28,27,21,5,7
ENSMUSG00000102449.1	chr1	68115195	68116547	-	1353	1	0	1	5	0	6	0	0	2	Gm37100	ENSMUSG00000102449.1	1	ENSMUST00000193344.1	1	1352	0	1352	0	0	3
ENSMUSG00000083795.1	chr1	68293280	68293726	-	447	7	0	3	1	4	0	0	0	0	Gm15670	ENSMUSG00000083795.1	1	ENSMUST00000117740.1	1	446	0	446	0	0	3
ENSMUSG00000080539.1	chr1	68384942	68385035	-	94	0	0	0	0	0	0	0	0	0	Gm25542	ENSMUSG00000080539.1	1	ENSMUST00000116889.1	1	93	0	93	0	0	3
ENSMUSG00000103307.1	chr1	68591618	68593686	-	2069	3	8	3	0	1	4	4	0	0	Gm19335	ENSMUSG00000103307.1	1	ENSMUST00000195836.1	1	2068	0	2068	0	0	3
ENSMUSG00000104508.1	chr1	68639424	68640829	-	1406	2	6	3	5	6	4	0	0	4	Gm37735	ENSMUSG00000104508.1	1	ENSMUST00000193995.1	1	1405	0	1405	0	0	3
ENSMUSG00000103642.1	chr1	68711037	68713405	-	2369	7	6	8	2	16	11	3	13	7	Gm37769	ENSMUSG00000103642.1	1	ENSMUST00000193753.1	1	2368	0	2368	0	0	3
ENSMUSG00000103809.1	chr1	68758485	68761727	-	3243	10	0	3	17	12	13	8	7	0	Gm37061	ENSMUSG00000103809.1	1	ENSMUST00000195066.1	1	3242	0	3242	0	0	3
ENSMUSG00000087514.1	chr1	69091913	69106740	-	480	4	21	3	18	10	15	14	18	17	Gm16076	ENSMUSG00000087514.1	1	ENSMUST00000140116.1	2	478	14349	339	14349	0	4
ENSMUSG00000084332.1	chr1	69130914	69131299	-	386	0	0	0	0	1	0	0	0	0	Gm8840	ENSMUSG00000084332.1	1	ENSMUST00000122454.1	1	385	0	385	0	0	3
ENSMUSG00000101387.1	chr1	69377321	69378071	+	751	0	0	0	0	0	0	0	0	0	Pced1c-ps	ENSMUSG00000101387.1	1	ENSMUST00000187740.1	1	750	0	750	0	0	-1
ENSMUSG00000099804.1	chr1	69441056	69444084	+	3029	0	0	0	1	2	0	0	2	2	Gm28497	ENSMUSG00000099804.1	1	ENSMUST00000189646.1	1	3028	0	3028	0	0	-1
ENSMUSG00000100354.1	chr1	69490357	69493788	-	3432	1	6	0	6	3	4	6	0	0	Gm29113	ENSMUSG00000100354.1	1	ENSMUST00000185991.1	1	3431	0	3431	0	0	3
ENSMUSG00000101156.1	chr1	69513932	69547707	+	2508	1	0	4	0	0	0	0	0	0	Gm29114	ENSMUSG00000101156.1	1	ENSMUST00000187100.1	4	2504	31271	1844	26544	0	-1
ENSMUSG00000025997.13	chr1	69531214	69687245	-	11613	1707	1830	1835	1739	1968	2214	1850	1916	2023	Ikzf2	ENSMUSG00000025997.13	9	ENSMUST00000027146.8,ENSMUST00000190771.6,ENSMUST00000187184.6,ENSMUST00000190855.6,ENSMUST00000188110.6,ENSMUST00000191262.6,ENSMUST00000190016.1,ENSMUST00000187870.1,ENSMUST00000188919.1	8,8,9,6,6,5,4,2,3	9270,2475,2004,1353,1359,1141,357,2168,1902	145337,145374,146659,144036,144030,144248,107053,810,3679	8278,1455,910,724,724,724,157,1756,1755	105163,105163,105163,105163,105163,134474,105163,810,2869	0,0,0,0,0,0,0,0,0	8,8,9,6,6,5,6,4,5
ENSMUSG00000100815.1	chr1	69595036	69598522	-	3487	23	6	7	10	9	16	18	19	23	Gm29112	ENSMUSG00000100815.1	1	ENSMUST00000188962.1	1	3486	0	3486	0	0	3
ENSMUSG00000099954.1	chr1	69660187	69662061	-	1875	11	16	0	4	10	13	0	7	6	Gm28112	ENSMUSG00000099954.1	1	ENSMUST00000190898.1	1	1874	0	1874	0	0	3
ENSMUSG00000103402.1	chr1	69770868	69772753	+	1886	0	0	0	0	0	0	0	0	0	Gm37930	ENSMUSG00000103402.1	1	ENSMUST00000194308.1	1	1885	0	1885	0	0	-1
ENSMUSG00000053153.14	chr1	69826970	70725132	+	6764	313	446	349	285	240	353	286	260	416	Spag16	ENSMUSG00000053153.14	7	ENSMUST00000187159.6,ENSMUST00000190833.6,ENSMUST00000065425.11,ENSMUST00000113940.3,ENSMUST00000161131.2,ENSMUST00000161310.7,ENSMUST00000191569.1	13,13,17,11,7,8,5	1420,1325,2109,3548,976,1289,1709	438887,438882,896035,95702,41044,772222,328654	160,150,365,2580,292,365,1219	267998,267998,267998,27081,12429,267998,267998	0,0,1903,1207,0,0,0	-1,-1,1,1,-1,-1,-1
ENSMUSG00000089345.1	chr1	69921473	69921747	-	275	0	0	0	0	0	0	0	0	0	Gm22665	ENSMUSG00000089345.1	1	ENSMUST00000158720.1	1	274	0	274	0	0	3
ENSMUSG00000080524.1	chr1	69955004	69955129	-	126	0	0	0	0	0	0	0	0	0	Gm23879	ENSMUSG00000080524.1	1	ENSMUST00000116874.1	1	125	0	125	0	0	3
ENSMUSG00000101730.1	chr1	70067968	70068055	-	88	13	10	8	7	8	10	1	7	7	Gm28580	ENSMUSG00000101730.1	1	ENSMUST00000186767.1	1	87	0	87	0	0	3
ENSMUSG00000103052.1	chr1	70310512	70312911	-	2400	0	0	0	0	0	0	0	0	0	Gm38272	ENSMUSG00000103052.1	1	ENSMUST00000194431.1	1	2399	0	2399	0	0	3
ENSMUSG00000104287.1	chr1	70571435	70577271	-	5837	0	0	0	0	0	0	0	0	0	Gm37456	ENSMUSG00000104287.1	1	ENSMUST00000193176.1	1	5836	0	5836	0	0	3
ENSMUSG00000075952.1	chr1	70596815	70596921	+	107	0	2	0	0	4	0	0	0	3	Gm23422	ENSMUSG00000075952.1	1	ENSMUST00000102000.1	1	106	0	106	0	0	-1
ENSMUSG00000045648.15	chr1	70725715	70885397	+	7689	71	47	22	46	48	61	54	19	139	Vwc2l	ENSMUSG00000045648.15	4	ENSMUST00000053922.11,ENSMUST00000159205.1,ENSMUST00000161937.1,ENSMUST00000162182.1	4,2,3,6	4651,4189,4320,1189	155031,2261,155160,155377	3330,3503,3315,422	131001,2261,152899,131001	666,0,418,524	2,-1,2,3
ENSMUSG00000026196.7	chr1	71027498	71103146	-	5659	4206	5098	4176	3820	4357	4810	2412	3411	2837	Bard1	ENSMUSG00000026196.7	1	ENSMUST00000027393.7	11	5648	70000	3354	15222	0	11
ENSMUSG00000089965.1	chr1	71039652	71040030	-	379	8	14	6	11	6	20	14	14	15	Gm16236	ENSMUSG00000089965.1	1	ENSMUST00000159588.1	1	378	0	378	0	0	3
ENSMUSG00000101551.1	chr1	71155246	71156020	-	775	0	0	0	0	0	0	0	2	0	Gm8870	ENSMUSG00000101551.1	1	ENSMUST00000188170.1	1	774	0	774	0	0	3
ENSMUSG00000050296.14	chr1	71242276	71414910	-	14808	1	0	4	7	6	4	12	13	23	Abca12	ENSMUSG00000050296.14	5	ENSMUST00000087268.6,ENSMUST00000188752.1,ENSMUST00000187097.6,ENSMUST00000191520.1,ENSMUST00000189102.1	53,9,18,1,3	9084,2851,3168,3168,1486	163550,14223,99576,0,51667	1128,1505,534,3168,1011	38897,5864,38897,0,38897	0,0,0,0,0	53,11,20,3,5
ENSMUSG00000101617.1	chr1	71493737	71493814	-	78	0	0	0	0	0	0	0	0	0	Gm6947	ENSMUSG00000101617.1	1	ENSMUST00000186254.1	1	77	0	77	0	0	3
ENSMUSG00000026192.13	chr1	71557150	71579631	+	7985	13853	16459	13422	13349	13364	15337	13597	13998	13801	Atic	ENSMUSG00000026192.13	6	ENSMUST00000027384.5,ENSMUST00000187982.1,ENSMUST00000148077.7,ENSMUST00000155769.7,ENSMUST00000136443.1,ENSMUST00000154855.1	16,1,3,12,4,4	2829,2772,2530,1619,2572,430	19652,0,3489,14565,3413,3664	1079,2772,2309,455,2309,204	3005,0,3266,2847,1603,1979	1763,0,0,0,0,0	1,-1,-1,-1,-1,-1
ENSMUSG00000026193.15	chr1	71585520	71653200	-	11685	19391	30975	26168	19705	22220	31336	18009	27660	22584	Fn1	ENSMUSG00000026193.15	17	ENSMUST00000188894.6,ENSMUST00000188674.6,ENSMUST00000189821.6,ENSMUST00000187938.6,ENSMUST00000190780.6,ENSMUST00000055226.12,ENSMUST00000186129.6,ENSMUST00000185408.6,ENSMUST00000186575.1,ENSMUST00000187627.1,ENSMUST00000186985.1,ENSMUST00000188092.1,ENSMUST00000189160.1,ENSMUST00000186613.1,ENSMUST00000186940.6,ENSMUST00000186879.1,ENSMUST00000186736.1	45,45,44,45,44,46,44,17,3,10,6,3,12,4,7,6,4	7998,7635,7366,7920,7650,8269,7753,4005,492,1180,810,700,2766,422,1343,2098,667	59654,60014,60283,59729,59998,59382,59923,20036,3718,9091,3206,1757,17481,11409,8993,6597,6862	763,760,760,760,759,759,759,1182,304,179,286,534,986,177,329,1225,340	5090,5090,5090,5090,5090,5090,5090,3155,3155,2429,1022,1022,3259,9037,2396,2307,3507	0,0,0,0,0,0,0,0,0,585,613,0,0,212,0,0,0	45,45,44,45,44,46,44,19,5,6,3,5,14,2,7,8,6
ENSMUSG00000073652.10	chr1	71652837	71662843	+	2091	52	92	32	45	56	79	60	66	68	Apol7d	ENSMUSG00000073652.10	4	ENSMUST00000097699.2,ENSMUST00000127218.7,ENSMUST00000126516.2,ENSMUST00000125934.1	3,3,4,3	823,423,1189,427	3797,8742,8319,3479	412,196,824,200	3659,7668,3659,2547	0,0,0,0	-1,-1,-1,-1
ENSMUSG00000101834.1	chr1	71709705	71710055	-	351	1	3	0	1	3	2	0	3	0	Gm5829	ENSMUSG00000101834.1	1	ENSMUST00000191383.1	1	350	0	350	0	0	3
ENSMUSG00000100319.1	chr1	71714048	71714924	-	877	1	1	7	5	2	1	0	5	7	Gm5256	ENSMUSG00000100319.1	1	ENSMUST00000191412.1	1	876	0	876	0	0	3
ENSMUSG00000102689.1	chr1	71843090	71846610	-	3521	0	0	0	0	0	0	0	0	0	Gm37217	ENSMUSG00000102689.1	1	ENSMUST00000194017.1	1	3520	0	3520	0	0	3
ENSMUSG00000099707.6	chr1	71888112	71891204	+	1541	0	0	0	0	0	0	0	0	0	Gm8883	ENSMUSG00000099707.6	4	ENSMUST00000189680.6,ENSMUST00000188258.6,ENSMUST00000187594.6,ENSMUST00000188676.1	3,3,3,3	696,542,451,396	2396,2076,1016,1688	512,404,237,283	1978,1978,918,1590	0,0,0,0	-1,-1,-1,-1
ENSMUSG00000101211.1	chr1	71894068	71917125	-	3067	0	0	1	0	0	0	0	0	0	Gm28818	ENSMUSG00000101211.1	2	ENSMUST00000187553.1,ENSMUST00000189983.1	2,2	2987,235	20070,1958	2832,158	20070,1958	0,0	4,4
ENSMUSG00000101848.1	chr1	71958998	72005195	-	1093	0	0	3	0	0	0	0	2	0	4933417E11Rik	ENSMUSG00000101848.1	1	ENSMUST00000188213.1	3	1090	45107	629	41220	0	5
ENSMUSG00000101764.1	chr1	71983681	72038731	-	741	0	0	1	0	0	0	2	0	4	4930556G22Rik	ENSMUSG00000101764.1	1	ENSMUST00000185689.1	2	739	54311	392	54311	0	4
ENSMUSG00000059483.5	chr1	72004288	72004767	+	480	2	6	4	10	4	6	5	6	19	Gm5528	ENSMUSG00000059483.5	1	ENSMUST00000076314.5	1	479	0	479	0	0	-1
ENSMUSG00000101496.1	chr1	72087857	72088454	+	598	4	8	9	9	11	6	69	6	8	Gm8885	ENSMUSG00000101496.1	1	ENSMUST00000189382.1	1	597	0	597	0	0	-1
ENSMUSG00000102123.1	chr1	72107155	72122001	-	2048	12	9	4	15	12	7	14	20	15	Gm4319	ENSMUSG00000102123.1	1	ENSMUST00000191139.1	4	2044	12802	1862	6653	0	6
ENSMUSG00000039395.8	chr1	72159442	72212307	-	2284	369	488	382	345	364	408	581	533	574	Mreg	ENSMUSG00000039395.8	1	ENSMUST00000048860.8	5	2279	50586	1577	27881	0	5
ENSMUSG00000094655.1	chr1	72226240	72226430	+	191	470342	401569	300840	264579	411777	393463	464883	413651	368414	Gm25360	ENSMUSG00000094655.1	1	ENSMUST00000178786.1	1	190	0	190	0	0	-1
ENSMUSG00000097131.1	chr1	72236465	72274869	+	5335	105	152	172	196	204	196	183	162	280	D230017M19Rik	ENSMUSG00000097131.1	3	ENSMUST00000181973.1,ENSMUST00000180722.1,ENSMUST00000181382.1	4,4,2	1645,3092,2023	28026,27756,462	1393,2721,1334	23240,20580,462	0,0,0	-1,-1,-1
ENSMUSG00000094050.1	chr1	72236946	72237136	+	191	67	48	43	26	66	61	90	60	84	Gm23472	ENSMUSG00000094050.1	1	ENSMUST00000101806.2	1	190	0	190	0	0	-1
ENSMUSG00000093956.1	chr1	72244213	72244403	+	191	9798	9391	9325	6788	10013	12587	12822	8625	11113	Gm24497	ENSMUSG00000093956.1	1	ENSMUST00000177868.1	1	190	0	190	0	0	-1
ENSMUSG00000093843.1	chr1	72255008	72255198	+	191	1303718	1188441	917804	897410	1293210	1084404	1347345	1328923	1158360	Gm25939	ENSMUSG00000093843.1	1	ENSMUST00000179876.1	1	190	0	190	0	0	-1
ENSMUSG00000026189.13	chr1	72259167	72284314	-	1516	288	319	258	275	333	388	414	487	556	Pecr	ENSMUSG00000026189.13	4	ENSMUST00000134840.7,ENSMUST00000129458.1,ENSMUST00000027381.12,ENSMUST00000097698.4	8,4,8,7	1112,684,1178,925	23980,24457,23964,16338	266,261,261,174	6673,16594,6673,6673	0,0,0,0	3,2,8,7
ENSMUSG00000026188.11	chr1	72284369	72303104	+	3054	1796	1732	1756	2015	2014	1958	1400	1166	1967	Tmem169	ENSMUSG00000026188.11	2	ENSMUST00000027380.11,ENSMUST00000141783.1	3,4	2925,693	15810,15685	2420,408	13304,8454	892,0	2,3
ENSMUSG00000026187.8	chr1	72307421	72394952	+	2555	16731	21184	17770	16986	17232	18900	13343	15244	16919	Xrcc5	ENSMUSG00000026187.8	1	ENSMUST00000027379.8	21	2534	84997	244	24733	2178	1
ENSMUSG00000039372.5	chr1	72427112	72536930	-	4553	138	270	292	292	287	267	166	183	209	March4	ENSMUSG00000039372.5	1	ENSMUST00000047786.5	4	4549	105269	2305	82028	0	4
ENSMUSG00000085812.1	chr1	72459499	72460027	+	529	72	52	47	39	37	75	75	54	93	Gm15843	ENSMUSG00000085812.1	1	ENSMUST00000146593.1	1	528	0	528	0	0	-1
ENSMUSG00000039354.16	chr1	72583251	72633134	+	5728	4849	5986	5294	5595	5514	6288	4887	6004	6894	Smarcal1	ENSMUSG00000039354.16	9	ENSMUST00000145868.7,ENSMUST00000133123.7,ENSMUST00000152814.7,ENSMUST00000156797.7,ENSMUST00000136498.7,ENSMUST00000047615.14,ENSMUST00000152225.1,ENSMUST00000150725.7,ENSMUST00000126832.1	3,6,6,8,14,17,17,12,4	576,822,1748,2229,2804,3042,2977,3991,538	2164,11758,11272,13919,40861,46841,46542,37287,11239	353,280,766,766,766,766,766,1729,198	1768,3962,3962,3962,9861,9861,9861,9861,6329	0,0,0,0,0,2717,2717,0,0	3,2,-1,-1,-1,2,2,-1,-1
ENSMUSG00000110712.1	chr1	72641188	72642963	+	1282	41	34	21	29	21	44	18	28	33	RP23-432C4.2	ENSMUSG00000110712.1	2	ENSMUST00000212057.1,ENSMUST00000211909.1	2,3	1236,1224	539,496	1084,1029	539,324	0,0	-1,-1
ENSMUSG00000039342.5	chr1	72642980	72700579	-	4588	3	0	5	0	1	0	3	2	0	Ankar	ENSMUSG00000039342.5	4	ENSMUST00000212573.1,ENSMUST00000211837.1,ENSMUST00000053499.5,ENSMUST00000212710.1	23,24,24,3	3929,4519,4547,556	53670,53038,53035,9894	437,635,635,269	10069,8038,8038,8038	0,0,0,0	23,24,24,5
ENSMUSG00000110487.1	chr1	72692864	72693452	+	589	0	0	0	0	0	0	0	0	0	RP23-38P22.2	ENSMUSG00000110487.1	1	ENSMUST00000211962.1	1	588	0	588	0	0	-1
ENSMUSG00000110596.1	chr1	72706289	72706502	-	214	0	0	0	0	0	0	0	0	0	RP23-38P22.1	ENSMUSG00000110596.1	1	ENSMUST00000212794.1	1	213	0	213	0	0	3
ENSMUSG00000046330.10	chr1	72711290	72713813	+	1410	122886	141929	125641	116042	128788	126660	132371	131644	137951	Rpl37a	ENSMUSG00000046330.10	4	ENSMUST00000059980.10,ENSMUST00000212432.1,ENSMUST00000212335.1,ENSMUST00000211963.1	4,3,4,2	554,662,396,447	1969,1620,1463,342	311,486,157,428	1278,1278,958,342	275,0,178,0	1,-1,-1,-1
ENSMUSG00000039323.18	chr1	72824503	72852474	+	1847	32783	39260	36688	32576	32856	34145	32267	31118	34294	Igfbp2	ENSMUSG00000039323.18	3	ENSMUST00000047328.10,ENSMUST00000120564.1,ENSMUST00000155703.1	4,4,3	1303,987,903	26668,26158,2546	476,469,613	24122,23612,2294	914,474,0	1,2,-1
ENSMUSG00000026185.8	chr1	72857932	72874884	-	6006	4912	6853	6537	6601	5501	6531	9578	11193	13138	Igfbp5	ENSMUSG00000026185.8	2	ENSMUST00000027377.8,ENSMUST00000137339.1	4,6	6002,4275	10950,11935	4576,2140	9726,9726	0,0	4,8
ENSMUSG00000101968.6	chr1	72984844	73025507	+	1396	0	0	0	0	0	0	0	0	0	1700027A15Rik	ENSMUSG00000101968.6	5	ENSMUST00000188793.1,ENSMUST00000185768.6,ENSMUST00000191122.1,ENSMUST00000188349.1,ENSMUST00000190525.1	3,3,3,2,2	420,318,329,615,430	39460,9498,9133,2330,508	234,185,176,438,245	37754,7333,7721,2330,508	0,0,0,0,0	-1,-1,-1,-1,-1
ENSMUSG00000026182.6	chr1	73015074	73015909	-	437	0	0	0	0	0	0	0	0	0	Tnp1	ENSMUSG00000026182.6	1	ENSMUST00000027374.6	2	435	400	251	400	0	2
ENSMUSG00000102266.1	chr1	73206890	73209423	-	2534	0	0	0	0	0	0	0	0	0	Gm38106	ENSMUSG00000102266.1	1	ENSMUST00000194107.1	1	2533	0	2533	0	0	3
ENSMUSG00000101112.1	chr1	73269064	73306360	+	516	0	0	0	0	0	0	0	0	0	Gm29185	ENSMUSG00000101112.1	1	ENSMUST00000190578.1	3	513	36783	307	36187	0	-1
ENSMUSG00000100697.1	chr1	73311717	73312050	-	334	0	0	0	0	0	0	0	0	0	Gm29184	ENSMUSG00000100697.1	1	ENSMUST00000190038.1	1	333	0	333	0	0	3
ENSMUSG00000099877.6	chr1	73390775	73407569	-	2587	0	1	0	0	0	5	6	0	2	Pinc	ENSMUSG00000099877.6	2	ENSMUST00000190229.6,ENSMUST00000190487.1	5,6	2165,955	14629,11280	1625,228	4720,3998	0,0	7,8
ENSMUSG00000098697.1	chr1	73392246	73392399	+	154	0	0	0	0	0	0	0	0	0	Gm27315	ENSMUSG00000098697.1	1	ENSMUST00000183977.1	1	153	0	153	0	0	-1
ENSMUSG00000101812.1	chr1	73398968	73430790	+	562	0	0	0	0	0	0	0	0	0	D530049I02Rik	ENSMUSG00000101812.1	1	ENSMUST00000186582.1	3	559	31263	298	27777	0	-1
ENSMUSG00000100044.1	chr1	73512046	73513041	+	996	0	0	0	0	0	0	0	0	0	Gm9553	ENSMUSG00000100044.1	1	ENSMUST00000185703.1	1	995	0	995	0	0	-1
ENSMUSG00000100444.1	chr1	73522095	73529790	-	3970	8	7	13	2	4	11	9	3	3	C530043A13Rik	ENSMUSG00000100444.1	3	ENSMUST00000188155.1,ENSMUST00000189247.1,ENSMUST00000186453.1	2,1,5	1510,3363,545	2022,0,6044	1124,3363,209	2022,0,2777	0,0,0	4,3,7
ENSMUSG00000100429.1	chr1	73528937	73536349	+	660	0	0	0	0	0	0	0	0	0	Gm29186	ENSMUSG00000100429.1	1	ENSMUST00000189178.1	2	658	6754	600	6754	0	-1
ENSMUSG00000100301.6	chr1	73618088	73864466	-	2442	9	21	12	8	16	25	61	28	37	6030407O03Rik	ENSMUSG00000100301.6	2	ENSMUST00000191114.6,ENSMUST00000189514.1	4,9	1223,2085	124636,244293	578,578	70534,184999	0,0	6,11
ENSMUSG00000101344.1	chr1	73750321	73841917	-	790	4	1	0	7	3	5	2	5	18	Gm29183	ENSMUSG00000101344.1	1	ENSMUST00000188600.1	8	782	90814	180	66807	0	10
ENSMUSG00000088666.1	chr1	73763710	73763835	+	126	0	0	0	0	0	0	0	0	0	Gm25329	ENSMUSG00000088666.1	1	ENSMUST00000158041.1	1	125	0	125	0	0	-1
ENSMUSG00000098504.1	chr1	73855477	73855575	-	99	0	0	3	0	0	0	0	0	0	Mir6351	ENSMUSG00000098504.1	1	ENSMUST00000183826.1	1	98	0	98	0	0	3
ENSMUSG00000055322.15	chr1	73910231	74124449	-	16010	1133	1352	1340	1343	1300	1612	1306	1562	1538	Tns1	ENSMUSG00000055322.15	22	ENSMUST00000169786.7,ENSMUST00000187584.6,ENSMUST00000191104.6,ENSMUST00000187691.6,ENSMUST00000185702.6,ENSMUST00000185331.6,ENSMUST00000212888.1,ENSMUST00000189228.1,ENSMUST00000191527.6,ENSMUST00000185264.6,ENSMUST00000185529.1,ENSMUST00000191367.1,ENSMUST00000188942.1,ENSMUST00000191264.6,ENSMUST00000186381.6,ENSMUST00000189571.1,ENSMUST00000190389.6,ENSMUST00000187281.6,ENSMUST00000188436.1,…	35,33,33,12,28,27,34,3,2,3,3,2,5,7,10,5,5,7,1,8,7,4	9931,9883,9871,2801,5567,5502,5609,443,657,598,525,709,1847,1366,647,630,421,579,2902,507,405,401	204285,171236,204346,11801,75712,75753,204308,15441,2143,4796,4350,8961,4576,7380,25401,5738,8941,43391,0,101030,99408,34440	4443,4442,4442,1063,1529,1529,1529,393,352,352,198,577,1188,672,180,223,180,180,2902,114,114,298	52423,52423,52423,2853,26964,26964,52423,11780,2143,2653,2207,8961,2721,1988,12587,1988,4344,20785,0,52423,52423,20673	0,0,0,0,439,415,0,0,0,0,0,0,0,0,0,0,0,0,0,0,0,0	35,33,33,12,28,27,34,5,4,5,5,4,7,9,12,7,7,9,3,10,9,6
ENSMUSG00000061815.11	chr1	74125541	74148223	+	2329	27	27	12	36	17	29	17	15	67	Rufy4	ENSMUSG00000061815.11	2	ENSMUST00000080167.10,ENSMUST00000127134.1	12,12	2294,1829	20388,20365	626,626	6712,6712	1431,1681	4,2
ENSMUSG00000026180.8	chr1	74153989	74161246	+	3048	8	8	0	1	9	11	9	7	7	Cxcr2	ENSMUSG00000026180.8	2	ENSMUST00000027372.7,ENSMUST00000106899.3	3,2	2217,3044	4404,4211	1547,2916	4211,4211	1079,1079	2,2
ENSMUSG00000048480.5	chr1	74191785	74194631	-	1491	0	0	0	0	0	0	0	0	0	Cxcr1	ENSMUSG00000048480.5	2	ENSMUST00000190313.1,ENSMUST00000053389.4	1,2	1450,1123	0,1723	1450,1084	0,1723	-1051,-1051	1,2
ENSMUSG00000087820.1	chr1	74206554	74206620	-	67	0	0	0	0	0	0	0	0	0	Mir1928	ENSMUSG00000087820.1	1	ENSMUST00000157195.1	1	66	0	66	0	0	3
ENSMUSG00000094768.1	chr1	74212813	74212919	+	107	0	0	0	0	0	0	0	0	0	Gm25524	ENSMUSG00000094768.1	1	ENSMUST00000101821.1	1	106	0	106	0	0	-1
ENSMUSG00000006304.14	chr1	74236084	74268209	+	2033	13234	16605	13140	13800	14378	14506	12860	13378	15860	Arpc2	ENSMUSG00000006304.14	4	ENSMUST00000185733.1,ENSMUST00000113820.8,ENSMUST00000006467.13,ENSMUST00000113819.1	2,11,10,11	308,1428,1394,1302	496,30284,30076,30136	238,438,382,229	496,9181,9181,9033	0,893,893,845	1,2,1,2
ENSMUSG00000064272.3	chr1	74278550	74279624	+	1075	0	0	0	0	0	0	0	0	0	Gpbar1	ENSMUSG00000064272.3	1	ENSMUST00000077985.3	1	1074	0	1074	0	989	1
ENSMUSG00000006299.13	chr1	74279840	74284738	-	3458	27538	34387	32390	29523	26846	28467	29950	27694	33245	Aamp	ENSMUSG00000006299.13	6	ENSMUST00000006462.13,ENSMUST00000186833.1,ENSMUST00000178235.7,ENSMUST00000187046.1,ENSMUST00000191258.1,ENSMUST00000190008.1	11,6,11,6,5,3	1806,2756,1745,518,996,419	3092,1414,3089,2528,1086,806	469,922,463,119,582,247	673,544,673,1009,544,673	0,0,0,0,0,0	11,8,11,8,7,5
ENSMUSG00000101503.1	chr1	74281161	74281866	+	334	0	0	0	0	0	0	0	0	0	Gm28364	ENSMUSG00000101503.1	1	ENSMUST00000187908.1	2	332	373	277	373	0	-1
ENSMUSG00000026179.14	chr1	74284930	74353694	+	7832	1395	1634	1380	1589	1393	1398	1516	1391	1734	Pnkd	ENSMUSG00000026179.14	8	ENSMUST00000113805.7,ENSMUST00000027370.12,ENSMUST00000129219.1,ENSMUST00000138620.1,ENSMUST00000087226.10,ENSMUST00000152492.1,ENSMUST00000087225.5,ENSMUST00000190398.1	3,10,2,3,11,2,9,1	737,2927,879,432,3043,414,2850,3598	1787,65712,705,62080,65596,1082,18226,0	362,1926,792,181,1936,233,1928,3598	1082,61375,705,61375,60177,1082,14594,0	426,1148,0,0,1264,0,1074,0	1,1,-1,-1,1,-1,1,-1
ENSMUSG00000103013.1	chr1	74287542	74287860	-	319	0	0	0	0	0	0	3	0	4	Gm37503	ENSMUSG00000103013.1	1	ENSMUST00000192088.1	1	318	0	318	0	0	3
ENSMUSG00000006301.17	chr1	74288247	74305622	-	12659	396	501	461	426	424	447	341	405	610	Tmbim1	ENSMUSG00000006301.17	8	ENSMUST00000016309.15,ENSMUST00000152603.7,ENSMUST00000135384.7,ENSMUST00000113796.7,ENSMUST00000128505.1,ENSMUST00000154859.1,ENSMUST00000130763.7,ENSMUST00000141560.1	12,10,11,11,4,4,3,3	2366,3301,2535,11000,538,495,442,661	13792,4143,13565,5108,1390,10158,11270,9532	1271,1267,1267,9163,218,241,241,345	8684,1196,8684,1196,684,8684,10074,8336	0,0,0,0,74,0,0,0	12,12,13,11,4,6,5,5
ENSMUSG00000099931.1	chr1	74295603	74298867	+	3265	31	60	31	51	35	9	14	20	26	Gm29358	ENSMUSG00000099931.1	2	ENSMUST00000186510.1,ENSMUST00000187941.1	2,1	1732,3226	570,0	1549,3226	570,0	0,0	-1,-1
ENSMUSG00000103403.1	chr1	74307848	74310713	+	2866	20	20	12	29	20	27	18	15	21	Gm37931	ENSMUSG00000103403.1	1	ENSMUST00000194686.1	1	2865	0	2865	0	0	-1
ENSMUSG00000073650.8	chr1	74362108	74369321	+	2211	108	166	121	144	130	167	119	160	146	Catip	ENSMUSG00000073650.8	4	ENSMUST00000097697.7,ENSMUST00000128445.7,ENSMUST00000191010.1,ENSMUST00000186688.1	10,7,8,2	2091,796,1858,310	5122,4636,4850,1901	928,197,757,185	1901,1901,1901,1901	1497,0,1555,0	2,-1,1,-1
ENSMUSG00000026177.11	chr1	74375195	74386062	+	3705	128	143	66	118	98	130	182	193	161	Slc11a1	ENSMUSG00000026177.11	11	ENSMUST00000187516.6,ENSMUST00000147233.7,ENSMUST00000027368.5,ENSMUST00000131511.7,ENSMUST00000136786.7,ENSMUST00000135137.1,ENSMUST00000155865.1,ENSMUST00000133896.7,ENSMUST00000127487.1,ENSMUST00000149166.7,ENSMUST00000134189.1	14,14,15,12,9,2,3,4,2,3,4	1879,2570,2300,2714,1046,376,328,600,702,454,422	8681,8279,8559,8112,5527,942,2871,1922,98,378,1175	362,659,669,658,249,279,136,243,493,186,149	2507,2507,2507,2507,2507,942,2507,1544,98,280,524	1510,0,1632,0,0,0,0,0,0,0,0	1,-1,1,-1,-1,-1,-1,-1,-1,-1,-1
ENSMUSG00000026176.13	chr1	74391509	74397285	+	3334	1383	1832	1709	1535	1546	1642	1523	1650	1741	Ctdsp1	ENSMUSG00000026176.13	3	ENSMUST00000027367.13,ENSMUST00000141175.1,ENSMUST00000152659.1	7,6,4	2869,2951,389	2907,2536,1518	1829,1826,148	1314,1314,1029	779,0,0	1,-1,-1
ENSMUSG00000065468.1	chr1	74394310	74394394	+	85	0	3	2	10	10	4	0	0	5	Mir26b	ENSMUSG00000065468.1	1	ENSMUST00000083534.1	1	84	0	84	0	0	-1
ENSMUSG00000026175.12	chr1	74409376	74435559	+	3551	7	23	19	10	8	2	5	5	16	Vil1	ENSMUSG00000026175.12	4	ENSMUST00000027366.12,ENSMUST00000159749.1,ENSMUST00000161087.1,ENSMUST00000163018.1	20,7,3,3	3104,737,405,655	23079,3228,1190,1625	681,202,223,429	5633,1348,1050,1537	2465,0,0,0	2,-1,-1,-1
ENSMUSG00000033364.13	chr1	74435511	74544284	-	11081	21693	27283	23869	22113	23456	26894	22714	24535	26664	Usp37	ENSMUSG00000033364.13	7	ENSMUST00000044260.10,ENSMUST00000189257.6,ENSMUST00000188012.6,ENSMUST00000191058.6,ENSMUST00000186282.6,ENSMUST00000190592.1,ENSMUST00000187590.1	24,26,12,20,4,2,2	7087,4948,1824,5991,580,359,277	63205,101606,26623,50292,9508,5560,6050	3967,1748,351,2460,155,228,144	6232,30963,5967,6232,5560,5560,6050	0,0,0,0,0,0,0	24,26,14,22,6,4,4
ENSMUSG00000103227.1	chr1	74500340	74503301	-	2962	142	196	48	251	151	134	153	123	115	Gm37733	ENSMUSG00000103227.1	1	ENSMUST00000195478.1	1	2961	0	2961	0	0	3
ENSMUSG00000026174.9	chr1	74506058	74530842	+	3826	8374	9800	8048	8185	8390	9312	7103	7942	7717	Cnot9	ENSMUSG00000026174.9	3	ENSMUST00000087215.6,ENSMUST00000137100.1,ENSMUST00000147810.1	8,7,3	3260,824,769	21524,20203,3881	2156,179,585	10609,10856,3379	892,0,0	1,-1,-1
ENSMUSG00000026173.15	chr1	74542888	74567794	+	7045	127	167	206	215	131	213	1056	774	1658	Plcd4	ENSMUSG00000026173.15	11	ENSMUST00000141412.7,ENSMUST00000113749.7,ENSMUST00000067916.12,ENSMUST00000113745.7,ENSMUST00000113747.7,ENSMUST00000113750.7,ENSMUST00000185411.1,ENSMUST00000027362.13,ENSMUST00000152707.7,ENSMUST00000189956.1,ENSMUST00000135111.1	18,18,17,10,17,17,1,18,18,5,2	4664,4630,4535,1739,2703,2675,1911,2959,2993,507,669	20242,20276,20371,15964,20371,20399,0,18654,18620,4367,520	2047,2047,2047,316,231,231,1911,286,286,149,594	4885,4885,4885,4885,4885,4885,0,3263,3263,2221,520	1714,2408,2313,0,2313,2381,0,2408,1714,0,0	2,2,2,-1,2,2,-1,2,2,-1,-1
ENSMUSG00000026135.17	chr1	74565127	74588246	-	11355	789	894	757	1061	926	1003	719	928	861	Zfp142	ENSMUSG00000026135.17	8	ENSMUST00000113737.7,ENSMUST00000027315.13,ENSMUST00000066986.12,ENSMUST00000156613.7,ENSMUST00000127921.1,ENSMUST00000136865.7,ENSMUST00000130112.1,ENSMUST00000147011.2	9,9,9,10,8,3,2,3	7464,6471,5747,5892,5012,3873,3853,507	15437,15128,15896,15671,13782,2097,1867,2041	2904,2904,2904,2904,2904,3472,3465,208	5766,5457,7097,5935,5978,1867,1867,1867	0,0,0,0,0,0,0,0	9,9,9,6,3,5,4,5
ENSMUSG00000093155.1	chr1	74586896	74586972	-	77	9	1	9	10	11	9	5	5	0	Gm25035	ENSMUSG00000093155.1	1	ENSMUST00000175414.1	1	76	0	76	0	0	3
ENSMUSG00000026172.12	chr1	74588289	74592443	+	2192	2430	2890	2594	2481	2675	2685	2303	2349	2961	Bcs1l	ENSMUSG00000026172.12	4	ENSMUST00000113733.9,ENSMUST00000027358.10,ENSMUST00000113732.1,ENSMUST00000147464.1	8,8,8,2	1480,1882,1671,430	2355,2261,2144,212	392,621,392,237	1093,999,882,212	1250,1250,1250,0	2,2,2,-1
ENSMUSG00000026171.12	chr1	74593748	74601397	-	2181	2493	2640	2483	2516	2307	2684	2411	2712	2856	Rnf25	ENSMUSG00000026171.12	10	ENSMUST00000135140.7,ENSMUST00000027357.11,ENSMUST00000113721.7,ENSMUST00000149649.1,ENSMUST00000127938.7,ENSMUST00000154874.7,ENSMUST00000151003.1,ENSMUST00000136078.1,ENSMUST00000128491.1,ENSMUST00000132081.1	10,10,10,2,8,6,2,6,3,4	1497,1469,1441,421,804,416,313,363,385,300	6127,6180,6183,158,4551,4298,99,2619,2459,2332	654,654,649,241,152,99,246,99,242,132	2425,2425,2425,158,2425,2425,99,1282,2185,1282	0,0,0,0,0,0,0,0,0,0	3,10,10,4,10,8,4,8,5,6
ENSMUSG00000033276.18	chr1	74601445	74636894	+	6437	1350	1452	1484	1373	1524	1653	1286	1504	1634	Stk36	ENSMUSG00000033276.18	9	ENSMUST00000087183.10,ENSMUST00000145673.7,ENSMUST00000148456.7,ENSMUST00000113694.7,ENSMUST00000087186.10,ENSMUST00000189830.1,ENSMUST00000157007.7,ENSMUST00000155473.7,ENSMUST00000123154.1	27,26,26,5,24,5,4,16,11	5218,5463,3319,624,4041,654,642,2858,3005	30231,29948,29278,3387,30363,7392,2916,10398,7424	1179,1249,249,172,746,249,418,746,1179	5477,5477,5477,1915,8774,5538,1558,3334,3334	3925,0,0,434,3544,237,0,0,0	2,-1,2,2,2,1,-1,-1,-1
ENSMUSG00000033257.14	chr1	74661745	74703730	+	11527	15494	18480	16042	13673	15412	16956	12939	14195	13583	Ttll4	ENSMUSG00000033257.14	11	ENSMUST00000042125.14,ENSMUST00000141119.7,ENSMUST00000153636.7,ENSMUST00000129890.7,ENSMUST00000113678.1,ENSMUST00000143925.7,ENSMUST00000140591.1,ENSMUST00000155753.1,ENSMUST00000145132.7,ENSMUST00000128891.7,ENSMUST00000143790.1	20,7,2,5,17,7,5,2,7,5,4	9999,657,483,488,3745,805,486,752,5071,3384,756	31986,22950,10955,19486,15334,2497,2208,503,6688,1281,1351	6289,166,411,166,1565,191,191,718,4391,2437,400	10955,10955,10955,10955,5602,811,811,503,4819,595,629	3564,0,0,0,3373,0,0,0,0,0,0	3,3,-1,2,1,-1,-1,-1,-1,-1,-1
ENSMUSG00000026170.6	chr1	74713574	74737892	+	2173	35	69	54	23	41	40	39	35	58	Cyp27a1	ENSMUSG00000026170.6	3	ENSMUST00000027356.6,ENSMUST00000190781.1,ENSMUST00000189083.1	9,3,3	1883,642,781	22435,723,233	349,482,289	18028,645,152	1593,0,0	1,-1,-1
ENSMUSG00000006542.13	chr1	74738922	74749221	-	3682	0	0	0	4	5	7	5	1	5	Prkag3	ENSMUSG00000006542.13	6	ENSMUST00000160732.7,ENSMUST00000188073.6,ENSMUST00000113672.8,ENSMUST00000081636.12,ENSMUST00000162093.1,ENSMUST00000159728.1	14,14,12,13,10,4	2818,2818,1991,2328,1167,513	7215,7215,6381,6688,6233,873	1138,1138,616,616,406,222	2952,2952,2952,2952,2952,448	0,0,0,0,0,-145	13,13,12,13,7,1
ENSMUSG00000098351.1	chr1	74764798	74764890	+	93	0	0	0	0	0	0	0	0	0	Gm27507	ENSMUSG00000098351.1	1	ENSMUST00000184199.1	1	92	0	92	0	0	-1
ENSMUSG00000033227.7	chr1	74771892	74785322	+	2192	44	91	98	93	136	111	257	226	374	Wnt6	ENSMUSG00000033227.7	2	ENSMUST00000006716.7,ENSMUST00000189544.1	4,2	2067,918	11363,1245	1183,463	9880,1245	1091,0	1,-1
ENSMUSG00000099472.1	chr1	74774943	74777405	-	758	0	1	0	0	0	0	0	0	0	Gm29539	ENSMUSG00000099472.1	1	ENSMUST00000188031.1	3	755	1707	354	1333	0	5
ENSMUSG00000026167.14	chr1	74791516	74804179	+	2468	63	92	69	89	35	66	231	235	281	Wnt10a	ENSMUSG00000026167.14	2	ENSMUST00000006718.14,ENSMUST00000187238.1	4,2	2464,634	10199,9498	1056,372	6908,9498	1250,287	1,-1
ENSMUSG00000089964.1	chr1	74850895	74879953	+	1930	0	0	0	0	0	0	0	0	0	Gm16582	ENSMUSG00000089964.1	1	ENSMUST00000159627.1	4	1926	27132	1588	14221	0	-1
ENSMUSG00000090071.4	chr1	74854934	74857732	+	2799	18	13	11	7	13	6	21	19	41	Cdk5r2	ENSMUSG00000090071.4	1	ENSMUST00000160379.3	1	2798	0	2798	0	1109	1
ENSMUSG00000055197.4	chr1	74881509	74885419	-	1617	0	0	0	0	0	0	0	0	0	Fev	ENSMUSG00000055197.4	3	ENSMUST00000068631.3,ENSMUST00000159232.1,ENSMUST00000162938.1	3,3,2	1487,925,456	2423,2391,1745	1153,656,255	1745,1745,1745	0,-424,0	3,3,4
ENSMUSG00000006546.3	chr1	74889934	74893143	-	1193	0	0	0	2	0	0	0	2	6	Cryba2	ENSMUSG00000006546.3	2	ENSMUST00000006721.2,ENSMUST00000133833.2	5,3	715,920	2494,1441	202,433	1273,981	0,-160	5,1
ENSMUSG00000065616.3	chr1	74900658	74900721	-	64	0	0	0	0	0	0	0	0	0	Mir375	ENSMUSG00000065616.3	1	ENSMUST00000083682.3	1	63	0	63	0	0	3
ENSMUSG00000047021.14	chr1	74902071	74935599	-	7817	74	111	98	78	99	99	75	111	142	Ccdc108	ENSMUSG00000047021.14	3	ENSMUST00000094844.3,ENSMUST00000139950.7,ENSMUST00000130489.1	33,11,8	5694,3936,3417	27834,9355,8783	452,2239,2181	5573,3713,4570	0,0,0	33,13,10
ENSMUSG00000089653.1	chr1	74902371	74907653	+	517	0	0	0	0	0	0	0	0	0	Gm15841	ENSMUSG00000089653.1	1	ENSMUST00000160540.1	3	514	4768	317	2989	0	-1
ENSMUSG00000006538.11	chr1	74945315	74951672	-	3048	24	14	5	16	13	12	3	13	16	Ihh	ENSMUSG00000006538.11	3	ENSMUST00000164097.3,ENSMUST00000213812.1,ENSMUST00000189364.1	3,3,2	2465,2440,1383	3892,3892,2335	1432,1428,841	2335,2335,2335	0,0,0	3,3,4
ENSMUSG00000103145.1	chr1	74954252	74955841	+	1590	0	0	0	0	0	0	0	0	0	Gm37744	ENSMUSG00000103145.1	1	ENSMUST00000194616.1	1	1589	0	1589	0	0	-1
ENSMUSG00000026162.7	chr1	74967139	75125200	-	1118	607	689	582	523	544	580	430	415	489	Nhej1	ENSMUSG00000026162.7	2	ENSMUST00000152855.1,ENSMUST00000188033.1	5,1	1048,64	78452,0	629,64	76397,0	557,0	5,3
ENSMUSG00000026205.8	chr1	75125541	75133890	-	2167	4	0	0	3	0	1	0	1	7	Slc23a3	ENSMUSG00000026205.8	2	ENSMUST00000027405.5,ENSMUST00000188080.1	12,5	2047,790	6302,1043	477,351	2036,377	0,0	12,7
ENSMUSG00000033159.14	chr1	75134554	75142711	-	5635	4552	5196	5049	4947	4622	4487	4785	4631	5946	Cnppd1	ENSMUSG00000033159.14	8	ENSMUST00000168720.7,ENSMUST00000190679.6,ENSMUST00000189043.1,ENSMUST00000041213.11,ENSMUST00000187888.1,ENSMUST00000188037.1,ENSMUST00000189403.6,ENSMUST00000189809.1	9,8,3,10,2,2,6,5	3660,2054,2399,2419,682,402,627,426	4424,3869,706,4507,394,312,1829,2688	2378,1164,1161,1161,535,351,128,108	1531,1531,394,1531,394,312,996,1140	0,0,0,0,0,0,0,0	9,8,5,10,4,4,8,7
ENSMUSG00000049339.16	chr1	75142778	75147913	+	2999	5983	6692	6202	5910	6317	6667	6417	6106	7476	Fam134a	ENSMUSG00000049339.16	8	ENSMUST00000188873.6,ENSMUST00000097694.10,ENSMUST00000190240.6,ENSMUST00000189650.6,ENSMUST00000186037.6,ENSMUST00000187901.1,ENSMUST00000188977.1,ENSMUST00000189345.1	9,9,10,5,9,3,2,2	2468,2552,2428,443,2315,396,283,127	2663,2575,2687,1241,2427,799,448,330	1479,1483,1078,148,1477,293,186,81	615,615,615,448,615,448,448,330	517,1617,1505,0,1463,0,0,0	1,1,1,-1,-1,1,-1,-1
ENSMUSG00000026197.12	chr1	75168646	75171629	+	1772	964	1095	1024	986	973	1172	902	1149	1211	Zfand2b	ENSMUSG00000026197.12	9	ENSMUST00000162768.7,ENSMUST00000161106.7,ENSMUST00000160439.7,ENSMUST00000027394.11,ENSMUST00000161657.7,ENSMUST00000160903.7,ENSMUST00000160033.7,ENSMUST00000160282.1,ENSMUST00000186227.1	8,9,10,9,3,3,6,5,9	727,1276,1196,1307,879,617,659,824,766	1379,1703,1787,1663,355,348,1209,1085,1708	151,389,393,389,621,445,202,320,151	451,451,451,451,221,221,451,451,451	0,0,765,765,0,0,0,0,757	2,-1,2,1,-1,-1,-1,-1,-1
ENSMUSG00000026198.15	chr1	75171717	75180392	-	5315	4529	5258	4568	4256	4215	4585	5424	5001	6314	Abcb6	ENSMUSG00000026198.15	6	ENSMUST00000027396.14,ENSMUST00000160081.7,ENSMUST00000161215.1,ENSMUST00000159219.7,ENSMUST00000160757.1,ENSMUST00000161103.1	19,16,4,10,5,2	2947,3756,412,3615,824,1964	5728,4811,699,3951,2573,502	822,1364,230,1504,437,1158	1092,1092,489,1092,1092,502	0,0,124,0,0,0	19,18,4,12,7,4
ENSMUSG00000099519.1	chr1	75171731	75185146	-	5231	4607	5328	4702	4356	4336	4707	5493	5125	6339	Gm29253	ENSMUSG00000099519.1	1	ENSMUST00000185727.1	22	5209	8206	2361	1340	0	24
ENSMUSG00000033124.15	chr1	75180860	75192196	-	5762	747	841	695	857	866	923	637	696	803	Atg9a	ENSMUSG00000033124.15	9	ENSMUST00000189702.6,ENSMUST00000189820.6,ENSMUST00000189665.6,ENSMUST00000188347.6,ENSMUST00000040689.14,ENSMUST00000187785.1,ENSMUST00000188430.6,ENSMUST00000187601.6,ENSMUST00000186744.1	16,13,16,16,16,5,7,4,4	4094,4205,3997,4025,3748,827,960,712,453	6972,5312,7061,7306,7309,2230,3208,1481,1144	1071,1872,1066,1066,1065,248,269,386,227	1457,1457,1457,1457,1457,1573,1457,944,607	0,1678,0,0,0,0,0,0,0	16,13,8,16,16,7,9,6,6
ENSMUSG00000026199.17	chr1	75192151	75199387	+	5142	2472	2750	2725	2878	2542	2749	2215	2351	2444	Ankzf1	ENSMUSG00000026199.17	8	ENSMUST00000151887.8,ENSMUST00000134378.8,ENSMUST00000152233.8,ENSMUST00000134233.8,ENSMUST00000131788.8,ENSMUST00000145459.8,ENSMUST00000127625.2,ENSMUST00000127860.1	3,3,13,11,10,13,5,2	2256,1090,2726,3190,3416,2757,1162,830	677,2284,4501,4037,3811,4470,2180,133	2133,517,517,871,732,517,485,688	557,2164,1501,1501,1501,1501,1501,133	0,0,2234,0,0,858,673,0	-1,-1,1,-1,-1,1,1,-1
ENSMUSG00000026200.13	chr1	75198236	75210813	-	5905	714	960	718	738	774	829	680	738	934	Glb1l	ENSMUSG00000026200.13	12	ENSMUST00000186148.1,ENSMUST00000155716.7,ENSMUST00000185449.1,ENSMUST00000113623.7,ENSMUST00000189663.6,ENSMUST00000186173.6,ENSMUST00000132507.7,ENSMUST00000143193.1,ENSMUST00000146713.1,ENSMUST00000153584.1,ENSMUST00000185448.1,ENSMUST00000131408.1	2,18,1,17,11,14,14,3,5,2,7,3	193,2909,2081,2322,1268,1643,2017,468,631,505,677,2255	679,9626,0,9109,2131,8289,7648,687,712,112,7417,467	118,724,2081,410,266,266,535,304,245,424,166,1372	679,5378,0,5378,483,5853,5378,483,270,112,5378,308	0,0,0,0,1216,5,0,0,0,0,0,0	4,17,3,17,2,14,16,5,7,4,9,5
ENSMUSG00000099204.2	chr1	75209613	75209728	-	116	42	51	43	38	62	57	37	43	65	Gm27943	ENSMUSG00000099204.2	1	ENSMUST00000184844.2	1	115	0	115	0	0	3
ENSMUSG00000026201.12	chr1	75210838	75215606	+	4518	7291	8689	6790	7227	7253	7073	6211	6106	7173	Stk16	ENSMUSG00000026201.12	16	ENSMUST00000027401.10,ENSMUST00000139627.2,ENSMUST00000144355.7,ENSMUST00000191108.6,ENSMUST00000123825.7,ENSMUST00000135484.7,ENSMUST00000142052.7,ENSMUST00000189698.6,ENSMUST00000188460.2,ENSMUST00000126328.1,ENSMUST00000145144.1,ENSMUST00000186492.1,ENSMUST00000186350.1,ENSMUST00000131738.7,ENSMUST00000189242.1,ENSMUST00000156012.1	8,2,3,8,3,7,5,6,5,3,2,1,2,4,3,2	2868,837,688,1492,633,1563,781,845,647,616,634,400,603,606,816,853	1900,188,699,1880,727,1800,1476,1329,2064,609,456,0,153,786,465,117	1792,631,310,428,309,425,219,219,174,301,493,400,334,202,596,636	511,188,511,511,511,511,511,511,1472,456,456,0,153,348,348,117	911,0,0,678,0,0,0,0,0,0,0,0,0,0,0,0	2,-1,2,2,2,-1,-1,2,1,-1,-1,-1,-1,-1,-1,-1
ENSMUSG00000026202.13	chr1	75214228	75219865	-	3701	1175	1341	1545	1381	1527	1270	2233	1753	2916	Tuba4a	ENSMUSG00000026202.13	8	ENSMUST00000186213.6,ENSMUST00000079464.12,ENSMUST00000188593.1,ENSMUST00000186971.1,ENSMUST00000187103.1,ENSMUST00000186758.6,ENSMUST00000190717.6,ENSMUST00000189131.1	4,4,2,3,3,3,3,3	2836,2079,1203,842,812,779,406,343	2230,1573,619,616,1996,2229,1593,1632	2365,1621,981,492,540,439,222,222	1759,1102,619,379,1759,1992,1356,1395	0,652,979,471,0,0,0,0	4,4,2,3,5,5,5,5
ENSMUSG00000096094.2	chr1	75220095	75232102	-	1123	1	0	0	3	6	0	0	0	0	A630095N17Rik	ENSMUSG00000096094.2	3	ENSMUST00000179573.1,ENSMUST00000180101.2,ENSMUST00000191271.1	3,3,3	645,568,472	2914,11266,767	478,317,209	2721,8545,499	0,0,0	3,3,2
ENSMUSG00000026203.16	chr1	75236406	75245692	+	4249	3778	4767	4484	3902	4653	4233	3618	4138	4181	Dnajb2	ENSMUSG00000026203.16	12	ENSMUST00000188931.6,ENSMUST00000055223.13,ENSMUST00000082158.12,ENSMUST00000188346.6,ENSMUST00000188290.6,ENSMUST00000185403.6,ENSMUST00000187058.6,ENSMUST00000185654.2,ENSMUST00000186600.1,ENSMUST00000188628.1,ENSMUST00000190379.1,ENSMUST00000190445.1	9,8,9,10,10,10,9,3,2,2,2,4	3057,1191,1244,1813,1845,1356,1723,496,402,338,735,561	6225,7148,7095,7410,7358,7186,7411,2223,507,111,1262,2957	2230,483,483,898,896,261,896,334,226,269,706,203	1979,1979,1979,1979,1979,1979,1979,1716,507,111,1262,1979	967,772,825,825,825,276,772,0,0,0,0,328	2,1,1,2,2,2,2,1,-1,-1,-1,-1
ENSMUSG00000026204.15	chr1	75247027	75264502	-	4249	86	68	65	62	92	59	191	184	279	Ptprn	ENSMUSG00000026204.15	6	ENSMUST00000027404.11,ENSMUST00000187216.1,ENSMUST00000186178.6,ENSMUST00000189769.6,ENSMUST00000185849.6,ENSMUST00000188401.1	23,2,5,5,5,4	3531,726,454,507,405,421	13655,413,4962,5052,5538,5204	593,704,146,146,113,204	2972,413,1934,1934,2061,3390	0,0,0,0,0,0	23,4,7,7,7,6
ENSMUSG00000101840.1	chr1	75252322	75257427	+	386	0	0	0	0	0	0	0	2	0	Gm28294	ENSMUSG00000101840.1	1	ENSMUST00000191154.1	2	384	4721	313	4721	0	-1
ENSMUSG00000033061.15	chr1	75272199	75278415	-	1032	135	98	64	33	59	46	126	183	322	Resp18	ENSMUSG00000033061.15	4	ENSMUST00000039534.10,ENSMUST00000191283.1,ENSMUST00000186229.1,ENSMUST00000189203.1	6,3,5,3	742,344,489,645	5474,1718,5516,3569	213,160,132,459	2485,1596,2485,2485	0,0,0,0	6,5,4,5
ENSMUSG00000100556.1	chr1	75272605	75275652	+	215	0	0	0	0	0	0	0	0	0	Gm28902	ENSMUSG00000100556.1	1	ENSMUST00000191531.1	3	212	2835	109	2454	0	-1
ENSMUSG00000026209.15	chr1	75307896	75317990	-	4289	10068	11039	9752	9542	9893	10392	10595	10683	11939	Dnpep	ENSMUSG00000026209.15	14	ENSMUST00000066668.13,ENSMUST00000185797.6,ENSMUST00000185419.6,ENSMUST00000113605.9,ENSMUST00000187836.6,ENSMUST00000186278.1,ENSMUST00000187791.1,ENSMUST00000189551.6,ENSMUST00000187000.6,ENSMUST00000187075.6,ENSMUST00000191254.6,ENSMUST00000190005.1,ENSMUST00000188652.6,ENSMUST00000189282.2	15,15,14,15,14,5,10,6,9,8,4,3,4,3	2473,2495,2819,1556,1848,916,1258,626,935,890,379,395,387,405	7268,7268,6234,6824,6736,3660,3683,1813,1719,1221,1084,630,1233,423	813,813,1526,167,439,333,451,130,130,231,112,262,133,237	2326,2326,2326,2326,2326,2326,861,1178,689,279,532,532,1054,342	0,0,0,0,0,0,0,0,0,0,0,0,0,0	15,15,14,15,14,7,12,8,11,10,6,5,6,5
ENSMUSG00000026208.9	chr1	75360329	75368579	+	3754	164	352	226	246	187	209	191	173	307	Des	ENSMUSG00000026208.9	3	ENSMUST00000027409.9,ENSMUST00000144894.1,ENSMUST00000125948.1	9,2,4	3019,782,831	5231,95,777	1570,692,378	1637,95,452	1401,0,0	1,-1,-1
ENSMUSG00000085653.7	chr1	75368212	75375012	-	867	0	0	0	0	0	0	0	0	0	Gm15179	ENSMUSG00000085653.7	2	ENSMUST00000152799.7,ENSMUST00000130095.1	4,3	667,562	6133,1617	219,208	3433,1309	0,0	6,5
ENSMUSG00000026207.16	chr1	75375297	75432320	+	12741	367	382	381	442	378	371	529	534	660	Speg	ENSMUSG00000026207.16	15	ENSMUST00000087122.11,ENSMUST00000148515.7,ENSMUST00000113590.7,ENSMUST00000187214.1,ENSMUST00000125306.1,ENSMUST00000146705.1,ENSMUST00000125118.1,ENSMUST00000132228.1,ENSMUST00000132222.1,ENSMUST00000137868.7,ENSMUST00000113589.7,ENSMUST00000113588.7,ENSMUST00000113587.7,ENSMUST00000122266.2,ENSMUST00000143679.1	41,6,11,2,6,3,2,3,2,39,5,5,5,4,5	10760,926,3382,293,457,343,614,640,1470,9846,828,1073,1249,913,730	46263,5305,19067,963,5300,1076,2634,6455,2122,36848,3077,2776,2678,2284,3383	1968,547,1306,245,159,147,464,336,1306,1968,213,593,785,430,447	9111,2811,9111,963,2811,993,2634,5815,2122,9111,1304,1304,1304,1304,2817	9748,0,2575,0,250,0,0,396,0,8993,338,338,338,338,0	1,1,1,-1,1,-1,-1,-1,-1,-1,2,2,2,1,-1
ENSMUSG00000086053.1	chr1	75392131	75396363	-	472	0	0	0	0	0	0	0	0	0	Gm15178	ENSMUSG00000086053.1	1	ENSMUST00000132100.1	2	470	3762	314	3762	0	4
ENSMUSG00000033021.16	chr1	75435930	75443179	+	2395	837	950	893	874	910	1088	768	780	911	Gmppa	ENSMUSG00000033021.16	13	ENSMUST00000037796.13,ENSMUST00000113584.7,ENSMUST00000145166.7,ENSMUST00000143730.7,ENSMUST00000133418.7,ENSMUST00000144874.7,ENSMUST00000140287.7,ENSMUST00000131545.7,ENSMUST00000141124.1,ENSMUST00000188097.1,ENSMUST00000132291.7,ENSMUST00000135453.1,ENSMUST00000124539.1	13,14,5,7,9,7,6,8,4,8,5,3,2	1526,1678,642,643,909,681,822,790,560,768,544,551,788	5718,5552,2270,3902,4638,4946,2593,4647,1655,4318,768,456,167	273,272,351,186,197,186,328,186,332,186,207,272,735	1217,1217,1217,1217,1217,1217,1217,1217,1217,1217,289,289,167	1251,1251,0,0,0,0,0,0,0,448,0,0,0	2,3,2,2,3,2,2,2,2,-1,-1,-1,-1
ENSMUSG00000033007.15	chr1	75450436	75474343	+	2727	138	54	39	23	28	31	195	146	301	Asic4	ENSMUSG00000033007.15	2	ENSMUST00000113577.7,ENSMUST00000037708.9	9,10	2658,2454	21246,21190	977,824	17698,17698	1554,1610	1,1
ENSMUSG00000102605.1	chr1	75468570	75470761	-	2192	0	2	4	0	2	0	3	3	2	Gm37264	ENSMUSG00000102605.1	1	ENSMUST00000194916.1	1	2191	0	2191	0	0	3
ENSMUSG00000032997.16	chr1	75474569	75479307	-	3856	2027	2558	2288	2072	2047	2065	1881	1763	2260	Chpf	ENSMUSG00000032997.16	5	ENSMUST00000079205.13,ENSMUST00000094818.3,ENSMUST00000143496.7,ENSMUST00000138683.1,ENSMUST00000124042.1	4,5,3,4,3	2888,3060,3330,2451,494	1814,1672,840,2092,1110	1657,1651,1650,1650,322	974,506,506,1252,730	0,0,0,0,0	4,5,5,2,2
ENSMUSG00000026211.17	chr1	75479310	75506452	-	8467	2269	2866	2623	2276	2228	3002	2176	2468	2663	Obsl1	ENSMUSG00000026211.17	13	ENSMUST00000156499.1,ENSMUST00000113567.8,ENSMUST00000154636.1,ENSMUST00000156705.1,ENSMUST00000155084.7,ENSMUST00000132252.1,ENSMUST00000145382.1,ENSMUST00000150293.1,ENSMUST00000138352.1,ENSMUST00000113565.2,ENSMUST00000127507.7,ENSMUST00000129403.7,ENSMUST00000145306.1	2,20,2,3,12,5,2,3,2,9,6,4,5	654,5659,649,437,4119,1247,722,338,569,3370,2398,2705,2644	7269,14877,302,418,10988,971,120,935,77,6655,4945,1984,2136	593,1148,476,172,923,287,623,125,398,1148,943,1148,1239	7269,2951,302,302,2951,610,120,771,77,1785,1785,1247,1247	0,0,0,0,645,0,0,0,0,0,0,0,0	4,20,4,5,12,7,4,5,4,9,8,6,7
ENSMUSG00000051703.14	chr1	75479532	75485705	+	2504	1045	1221	1019	1005	1121	788	594	504	864	Tmem198	ENSMUSG00000051703.14	4	ENSMUST00000113575.8,ENSMUST00000148980.1,ENSMUST00000050899.6,ENSMUST00000187411.1	5,3,4,3	2180,484,2452,423	3981,2552,3673,2548	846,309,858,181	2172,2172,2172,2240	1079,0,1079,0	2,1,1,-1
ENSMUSG00000032968.4	chr1	75507077	75510366	+	1475	74	83	54	59	84	72	70	40	53	Inha	ENSMUSG00000032968.4	1	ENSMUST00000037330.4	2	1473	1816	1032	1816	1099	1
ENSMUSG00000082745.1	chr1	75514107	75514283	-	177	1	0	0	0	0	0	1	0	0	Gm15181	ENSMUSG00000082745.1	1	ENSMUST00000120142.1	1	176	0	176	0	0	3
ENSMUSG00000026213.15	chr1	75521529	75537335	+	5743	1915	2280	1904	1884	1833	1938	2442	2746	3058	Stk11ip	ENSMUSG00000026213.15	9	ENSMUST00000027414.15,ENSMUST00000113553.1,ENSMUST00000140963.7,ENSMUST00000129652.1,ENSMUST00000129794.1,ENSMUST00000156838.7,ENSMUST00000154303.1,ENSMUST00000146575.7,ENSMUST00000150560.1	25,24,23,7,3,12,3,4,3	4433,4129,4072,699,510,2956,587,555,427	11373,11251,11072,4602,668,5339,2076,1167,319	1249,846,849,260,350,849,376,199,299	2834,2834,2834,2834,518,1953,1953,830,223	3195,3195,0,0,0,0,0,0,0	2,1,-1,-1,-1,-1,-1,-1,-1
ENSMUSG00000082059.1	chr1	75542211	75542558	+	348	0	0	0	0	0	0	0	3	2	Gm15183	ENSMUSG00000082059.1	1	ENSMUST00000118933.1	1	347	0	347	0	0	-1
ENSMUSG00000006576.16	chr1	75546266	75562172	+	8599	2614	2954	2495	2788	2463	2600	2793	2477	3426	Slc4a3	ENSMUSG00000006576.16	12	ENSMUST00000124341.7,ENSMUST00000129703.7,ENSMUST00000150142.7,ENSMUST00000027415.11,ENSMUST00000145516.1,ENSMUST00000138814.1,ENSMUST00000132612.7,ENSMUST00000189794.1,ENSMUST00000154101.7,ENSMUST00000142257.1,ENSMUST00000145258.2,ENSMUST00000132110.1	23,3,4,23,3,4,21,2,4,3,11,4	7159,466,559,3903,703,418,6206,566,917,807,1839,543	8747,745,1017,8491,514,1060,8031,312,866,554,2691,1480	3359,274,165,277,511,165,2068,301,454,374,225,225	1439,433,546,1439,312,546,1439,312,451,451,449,1004	3662,0,0,1711,0,0,0,0,0,0,617,241	2,-1,2,2,-1,2,-1,-1,1,-1,-1,-1
ENSMUSG00000083244.1	chr1	75568083	75568574	+	492	0	0	0	0	0	0	0	0	0	Gm15180	ENSMUSG00000083244.1	1	ENSMUST00000117745.1	1	491	0	491	0	0	-1
ENSMUSG00000082528.1	chr1	75624654	75626329	+	1676	0	0	0	0	0	0	0	0	0	Gm15182	ENSMUSG00000082528.1	1	ENSMUST00000120832.1	1	1675	0	1675	0	0	-1
ENSMUSG00000082012.1	chr1	75636390	75637179	+	790	10	11	12	8	15	17	16	12	14	Gm5257	ENSMUSG00000082012.1	1	ENSMUST00000121823.1	1	789	0	789	0	0	-1
ENSMUSG00000099996.1	chr1	76016658	76018756	-	487	0	0	0	0	0	0	0	0	0	Gm29065	ENSMUSG00000099996.1	1	ENSMUST00000188786.1	4	483	1615	287	864	0	6
ENSMUSG00000101763.1	chr1	76110181	76110580	-	400	0	0	0	0	0	0	0	0	0	Gm29068	ENSMUSG00000101763.1	1	ENSMUST00000191607.1	1	399	0	399	0	0	3
ENSMUSG00000100827.1	chr1	76420692	76528422	+	675	0	0	1	2	0	0	0	0	0	Gm29069	ENSMUSG00000100827.1	1	ENSMUST00000185857.1	2	673	107057	606	107057	0	-1
ENSMUSG00000100553.6	chr1	76489133	76502028	+	2188	22	51	26	18	38	42	55	45	27	Gm17751	ENSMUSG00000100553.6	2	ENSMUST00000190362.6,ENSMUST00000189132.1	5,5	1599,1999	10712,10896	1112,1696	5212,5212	0,0	-1,-1
ENSMUSG00000098611.1	chr1	76509560	76509643	+	84	0	0	0	0	0	0	0	0	0	Mir6343	ENSMUSG00000098611.1	1	ENSMUST00000183584.1	1	83	0	83	0	0	-1
ENSMUSG00000100534.1	chr1	76890472	77027792	-	2456	2	5	1	0	5	0	0	0	0	Gm816	ENSMUSG00000100534.1	1	ENSMUST00000191156.1	2	2454	134866	2205	134866	0	4
ENSMUSG00000102904.1	chr1	77143227	77146992	-	3766	0	0	2	0	0	0	0	0	1	Gm38265	ENSMUSG00000102904.1	1	ENSMUST00000193479.1	1	3765	0	3765	0	0	3
ENSMUSG00000089326.1	chr1	77144753	77144846	+	94	0	0	0	0	0	0	0	0	0	Gm25974	ENSMUSG00000089326.1	1	ENSMUST00000158701.1	1	93	0	93	0	0	-1
ENSMUSG00000026235.14	chr1	77367185	77515088	-	8054	78591	92684	94755	83868	89330	105241	45051	52023	51991	Epha4	ENSMUSG00000026235.14	7	ENSMUST00000027451.12,ENSMUST00000188952.6,ENSMUST00000188797.6,ENSMUST00000187346.1,ENSMUST00000190149.6,ENSMUST00000189934.1,ENSMUST00000186930.1	18,18,17,3,16,8,3	6310,6297,3595,611,3027,3458,581	141593,141593,138354,3383,138421,114830,113279	2486,2482,708,234,663,1808,338	61528,61528,61528,2488,61528,61528,88052	0,0,0,261,0,0,0	17,17,17,2,2,10,5
ENSMUSG00000099141.1	chr1	77496653	77496768	-	116	14	25	16	8	15	23	6	19	9	Mir6352	ENSMUSG00000099141.1	1	ENSMUST00000184495.1	1	115	0	115	0	0	3
ENSMUSG00000101849.1	chr1	77515280	77517128	+	1849	70	102	62	101	50	84	56	90	71	Gm28386	ENSMUSG00000101849.1	1	ENSMUST00000189147.1	1	1848	0	1848	0	0	-1
ENSMUSG00000101506.1	chr1	77570672	77570963	+	292	0	0	0	0	0	0	0	0	0	Gm28385	ENSMUSG00000101506.1	1	ENSMUST00000185671.1	1	291	0	291	0	0	-1
ENSMUSG00000065215.1	chr1	77898283	77898446	-	164	0	0	0	0	0	0	0	0	0	Gm26263	ENSMUSG00000065215.1	1	ENSMUST00000083281.1	1	163	0	163	0	0	3
ENSMUSG00000102052.1	chr1	77942966	77972376	-	854	0	0	0	0	0	0	0	0	0	Gm28387	ENSMUSG00000102052.1	1	ENSMUST00000189245.1	4	850	28560	451	23601	0	6
ENSMUSG00000004872.15	chr1	78101267	78197134	-	6187	16	30	38	26	12	18	21	37	24	Pax3	ENSMUSG00000004872.15	3	ENSMUST00000004994.15,ENSMUST00000087086.6,ENSMUST00000172555.1	9,8,5	3069,3855,3266	92502,92009,10391	1568,2304,2320	60009,60009,6666	0,0,0	9,8,7
ENSMUSG00000032908.9	chr1	78310345	78420289	+	4002	32	8	18	35	17	19	14	18	8	Sgpp2	ENSMUSG00000032908.9	1	ENSMUST00000036172.9	5	3997	105947	3414	49569	1060	1
ENSMUSG00000099561.1	chr1	78325628	78340106	-	1450	0	0	0	0	0	0	0	0	0	Gm28410	ENSMUSG00000099561.1	1	ENSMUST00000188113.1	4	1446	13032	730	11619	0	6
ENSMUSG00000102945.1	chr1	78375614	78376431	+	818	0	0	0	0	0	0	0	0	0	Gm37884	ENSMUSG00000102945.1	1	ENSMUST00000191857.1	1	817	0	817	0	0	-1
ENSMUSG00000026245.16	chr1	78417975	78488897	-	2620	9498	10853	9055	10185	10134	10600	9230	9866	10279	Farsb	ENSMUSG00000026245.16	7	ENSMUST00000170217.7,ENSMUST00000068333.13,ENSMUST00000189529.6,ENSMUST00000188247.6,ENSMUST00000189931.6,ENSMUST00000190441.1,ENSMUST00000191021.1	18,17,17,11,6,7,4	2018,1934,1784,959,443,612,652	68866,61895,61993,24904,17166,15660,10314	247,277,260,154,154,154,391	18290,18290,18290,8674,6422,5403,6422	0,0,0,0,0,0,0	17,17,4,13,8,9,6
ENSMUSG00000101798.1	chr1	78433352	78433612	+	261	0	0	0	0	0	0	0	0	0	Gm28995	ENSMUSG00000101798.1	1	ENSMUST00000186625.1	1	260	0	260	0	0	-1
ENSMUSG00000104018.1	chr1	78465448	78466926	-	1479	42	45	17	60	36	61	22	48	29	4833412K13Rik	ENSMUSG00000104018.1	1	ENSMUST00000195509.1	1	1478	0	1478	0	0	3
ENSMUSG00000090486.2	chr1	78497026	78512158	-	3310	12	15	19	11	16	18	2	12	24	BC035947	ENSMUSG00000090486.2	2	ENSMUST00000170511.2,ENSMUST00000190853.1	2,3	3061,3001	12071,1135	2759,2756	12071,741	0,0	2,5
ENSMUSG00000012187.13	chr1	78510991	78538173	+	1558	4	4	1	7	2	0	2	5	5	Mogat1	ENSMUSG00000012187.13	6	ENSMUST00000134947.7,ENSMUST00000149732.7,ENSMUST00000113524.7,ENSMUST00000152111.1,ENSMUST00000012331.6,ENSMUST00000125458.1	5,5,7,2,6,2	791,794,1221,395,1172,393	15913,17281,25781,10630,25134,152	204,204,227,243,229,229	10630,11469,10630,10630,10630,152	0,0,1002,0,1002,0	2,1,2,1,1,-1
ENSMUSG00000099364.1	chr1	78595031	78609508	-	2092	0	3	0	0	0	0	0	0	0	5730419F03Rik	ENSMUSG00000099364.1	1	ENSMUST00000190504.1	2	2090	12387	1828	12387	0	4
ENSMUSG00000100562.1	chr1	78615467	78620165	+	1011	0	0	0	0	0	0	0	0	0	Gm29611	ENSMUSG00000100562.1	1	ENSMUST00000186132.1	2	1009	3689	964	3689	0	-1
ENSMUSG00000032883.15	chr1	78657825	78707743	+	4357	25215	30965	26898	23904	24954	27150	14423	14924	15652	Acsl3	ENSMUSG00000032883.15	7	ENSMUST00000035779.14,ENSMUST00000134566.7,ENSMUST00000142704.7,ENSMUST00000135642.1,ENSMUST00000132997.1,ENSMUST00000154777.1,ENSMUST00000148608.1	16,14,15,3,4,6,4	3934,2478,2961,499,623,736,639	45984,46540,46123,16890,9786,6030,3994	1485,643,709,417,267,150,373	18313,30134,23490,10663,6227,1976,1967	2149,1694,2149,0,0,0,0	3,2,2,2,-1,-1,-1
ENSMUSG00000079470.8	chr1	78658038	78671512	+	7679	8703	11683	11169	10456	11132	12655	16039	18947	20591	Utp14b	ENSMUSG00000079470.8	2	ENSMUST00000053760.11,ENSMUST00000151622.1	3,4	7390,3681	6084,5463	7186,3258	5038,2751	2342,2342	3,4
ENSMUSG00000099377.1	chr1	78783136	78784859	-	1724	27	68	38	45	29	41	21	33	44	Gm6159	ENSMUSG00000099377.1	1	ENSMUST00000191249.1	1	1723	0	1723	0	0	3
ENSMUSG00000099706.1	chr1	78791623	79224511	-	3283	0	0	0	0	0	0	0	0	0	Gm29536	ENSMUSG00000099706.1	1	ENSMUST00000189296.1	4	3279	429609	2670	237686	0	6
ENSMUSG00000047330.8	chr1	78816758	78820028	+	2657	181	233	206	152	168	328	150	167	216	Kcne4	ENSMUSG00000047330.8	2	ENSMUST00000057262.7,ENSMUST00000187432.1	2,3	2655,1810	615,1291	2417,1531	615,676	512,193	2,2
ENSMUSG00000101324.1	chr1	78821258	78822652	+	689	0	6	7	0	2	0	0	3	3	Gm29187	ENSMUSG00000101324.1	1	ENSMUST00000186681.1	2	687	707	463	707	0	-1
ENSMUSG00000072978.3	chr1	78967637	78968079	-	443	11	16	16	18	20	11	11	8	20	Gm5830	ENSMUSG00000072978.3	1	ENSMUST00000049117.6	1	442	0	442	0	0	3
ENSMUSG00000050711.7	chr1	79434669	79440120	-	2515	865	983	919	1256	1060	1026	1491	1083	2828	Scg2	ENSMUSG00000050711.7	2	ENSMUST00000185234.1,ENSMUST00000049972.5	3,2	2314,2513	3059,2938	1262,2349	2938,2938	0,-1849	3,2
ENSMUSG00000099562.1	chr1	79505803	79507157	-	1355	0	0	0	0	0	0	1	0	0	Gm19027	ENSMUSG00000099562.1	1	ENSMUST00000187291.1	1	1354	0	1354	0	0	3
ENSMUSG00000077782.1	chr1	79513739	79513864	-	126	0	0	0	0	0	0	0	0	0	Gm24160	ENSMUSG00000077782.1	1	ENSMUST00000104594.1	1	125	0	125	0	0	3
ENSMUSG00000054702.14	chr1	79606876	79671972	-	2878	50	55	35	44	45	86	53	67	34	Ap1s3	ENSMUSG00000054702.14	3	ENSMUST00000162342.7,ENSMUST00000159312.1,ENSMUST00000160706.1	5,5,4	2871,897,449	62225,62223,62333	2326,357,178	46565,46565,46565	0,0,0	5,3,3
ENSMUSG00000102235.1	chr1	79619522	79621034	-	1513	0	0	0	0	0	1	4	0	1	Gm37886	ENSMUSG00000102235.1	1	ENSMUST00000195349.1	1	1512	0	1512	0	0	3
ENSMUSG00000073643.11	chr1	79702262	79776143	-	6488	4948	804	815	4990	752	5292	720	712	1054	Wdfy1	ENSMUSG00000073643.11	14	ENSMUST00000113512.7,ENSMUST00000113513.7,ENSMUST00000113515.7,ENSMUST00000113514.7,ENSMUST00000187005.6,ENSMUST00000113510.7,ENSMUST00000113511.7,ENSMUST00000127771.7,ENSMUST00000130714.7,ENSMUST00000143368.7,ENSMUST00000048820.13,ENSMUST00000138319.1,ENSMUST00000186464.1,ENSMUST00000125641.1	12,12,12,12,11,5,5,2,2,7,5,2,3,4	4539,4539,4539,4539,1348,699,699,553,553,907,712,553,477,456	54968,54968,54968,54968,55033,42096,42096,2940,10382,50539,34654,2940,27624,27738	3308,3308,3308,3308,213,300,300,442,442,320,313,442,253,320	21435,21435,21435,21435,21435,21435,21435,2940,10382,21435,21435,2940,21435,21435	0,0,0,0,0,0,0,0,0,0,0,0,0,0	12,12,12,12,4,5,5,4,4,9,5,4,5,6
ENSMUSG00000104497.1	chr1	79762717	79764507	+	1791	0	0	0	5	0	0	0	0	5	Gm10555	ENSMUSG00000104497.1	1	ENSMUST00000193178.1	1	1790	0	1790	0	0	-1
ENSMUSG00000026248.9	chr1	79776018	79781445	+	1644	6565	7639	6765	6285	6613	6510	6287	6297	7674	Mrpl44	ENSMUSG00000026248.9	2	ENSMUST00000027464.8,ENSMUST00000189176.1	4,2	1420,883	4007,1547	481,688	1547,1547	998,0	1,-1
ENSMUSG00000026249.10	chr1	79794197	79861180	-	8287	1051	1171	1125	1021	1078	1264	1220	1199	1625	Serpine2	ENSMUSG00000026249.10	6	ENSMUST00000027467.10,ENSMUST00000189793.6,ENSMUST00000190724.1,ENSMUST00000153862.1,ENSMUST00000191529.1,ENSMUST00000191026.1	9,6,5,3,1,1	2201,690,817,2312,3392,1128	62298,23787,57328,41276,0,0	845,198,280,1847,3392,1128	36954,10526,39520,36954,0,0	0,0,0,0,0,0	9,8,7,5,3,3
ENSMUSG00000067106.6	chr1	79922536	79923426	-	891	24	23	12	21	17	15	25	29	17	Gm5529	ENSMUSG00000067106.6	1	ENSMUST00000165691.2	1	890	0	890	0	0	3
ENSMUSG00000100397.1	chr1	79957580	79958057	+	478	26	21	10	22	8	18	14	21	12	Gm28071	ENSMUSG00000100397.1	1	ENSMUST00000190355.1	1	477	0	477	0	0	-1
ENSMUSG00000099753.1	chr1	80098622	80098885	+	264	0	0	0	0	0	0	0	0	0	Gm28058	ENSMUSG00000099753.1	1	ENSMUST00000186421.1	1	263	0	263	0	0	-1
ENSMUSG00000096297.1	chr1	80135466	80135572	+	107	13	35	29	22	27	24	24	20	24	Gm23934	ENSMUSG00000096297.1	1	ENSMUST00000179111.1	1	106	0	106	0	0	-1
ENSMUSG00000102518.1	chr1	80146973	80148801	-	1829	0	0	0	0	0	0	0	0	0	Gm38339	ENSMUSG00000102518.1	1	ENSMUST00000195479.1	1	1828	0	1828	0	0	3
ENSMUSG00000099552.1	chr1	80184719	80192073	+	2333	0	0	6	0	0	0	0	4	0	9830004L10Rik	ENSMUSG00000099552.1	3	ENSMUST00000191325.1,ENSMUST00000188074.1,ENSMUST00000185548.1	2,3,2	2154,684,2175	5155,4394,2926	2021,342,2066	5155,2926,2926	0,0,0	-1,-1,-1
ENSMUSG00000043230.2	chr1	80198706	80218473	-	3357	38	52	46	30	66	47	14	29	62	Fam124b	ENSMUSG00000043230.2	2	ENSMUST00000058748.1,ENSMUST00000161427.1	2,4	2853,722	12385,17426	1842,247	12385,15594	0,0	2,6
ENSMUSG00000101257.1	chr1	80225044	80228792	+	1461	3	4	2	0	0	0	0	9	0	2310015K22Rik	ENSMUSG00000101257.1	1	ENSMUST00000191452.1	2	1459	2289	1332	2289	0	-1
ENSMUSG00000103404.1	chr1	80255031	80256197	-	1167	11	9	2	11	2	4	7	19	6	Gm37932	ENSMUSG00000103404.1	1	ENSMUST00000192258.1	1	1166	0	1166	0	0	3
ENSMUSG00000004364.14	chr1	80264923	80340480	-	4873	47056	59771	48797	53244	54324	59055	42722	47529	54574	Cul3	ENSMUSG00000004364.14	6	ENSMUST00000163119.7,ENSMUST00000164108.7,ENSMUST00000168372.1,ENSMUST00000167794.1,ENSMUST00000170897.7,ENSMUST00000167293.1	16,15,3,4,6,6	4693,2427,540,528,594,675	70864,71061,9954,8796,52663,50773	2364,464,340,186,160,197	18666,36053,9127,4704,18794,17592	0,0,211,0,435,424	16,15,3,6,3,3
ENSMUSG00000103076.1	chr1	80274731	80276413	-	1683	268	164	179	214	204	229	136	177	153	Gm37902	ENSMUSG00000103076.1	1	ENSMUST00000192839.1	1	1682	0	1682	0	0	3
ENSMUSG00000103525.1	chr1	80326177	80327994	-	1818	138	142	66	242	160	104	68	121	119	Gm37262	ENSMUSG00000103525.1	1	ENSMUST00000192816.1	1	1817	0	1817	0	0	3
ENSMUSG00000101722.1	chr1	80382822	80386251	+	3220	13	0	0	2	2	7	0	0	5	Gm29125	ENSMUSG00000101722.1	1	ENSMUST00000187121.1	2	3218	211	3161	211	0	-1
ENSMUSG00000090637.2	chr1	80383104	80385185	-	2082	0	2	1	1	3	3	0	1	0	Gm6189	ENSMUSG00000090637.2	1	ENSMUST00000164487.2	1	2081	0	2081	0	0	3
ENSMUSG00000101483.1	chr1	80445932	80479867	+	968	0	0	0	0	0	0	0	0	0	1700016L21Rik	ENSMUSG00000101483.1	2	ENSMUST00000187497.1,ENSMUST00000189139.1	3,3	391,626	29337,33301	270,498	25254,30620	0,0	-1,-1
ENSMUSG00000110100.1	chr1	80449597	80461448	-	594	0	0	0	0	0	0	0	0	0	Gm45261	ENSMUSG00000110100.1	1	ENSMUST00000211023.1	3	591	11260	237	6130	0	3
ENSMUSG00000038608.15	chr1	80501073	80758527	-	18267	892	1105	905	778	883	1015	623	720	851	Dock10	ENSMUSG00000038608.15	11	ENSMUST00000077946.11,ENSMUST00000190595.6,ENSMUST00000187774.6,ENSMUST00000189486.6,ENSMUST00000190983.6,ENSMUST00000186835.1,ENSMUST00000187885.1,ENSMUST00000191505.1,ENSMUST00000186087.6,ENSMUST00000191449.1,ENSMUST00000187698.1	56,48,56,12,57,1,1,14,13,12,2	7142,5977,6740,3627,6615,3419,1898,3458,1675,1372,2787	250233,85667,157016,24897,156947,0,0,171852,121491,71319,109994	753,638,273,2353,221,3419,1898,1861,221,183,2626	109994,6550,18826,6550,18826,0,0,109994,60955,18826,109994	0,576,0,1948,0,0,0,0,0,0,0	56,48,56,12,56,3,3,16,15,14,4
ENSMUSG00000103192.1	chr1	80666009	80669564	-	3556	1	0	1	2	0	0	4	0	0	Gm37645	ENSMUSG00000103192.1	1	ENSMUST00000194285.1	1	3555	0	3555	0	0	3
ENSMUSG00000104488.1	chr1	80728809	80730664	-	1856	0	5	1	1	0	4	1	0	4	Gm38062	ENSMUSG00000104488.1	1	ENSMUST00000192541.1	1	1855	0	1855	0	0	3
ENSMUSG00000102721.1	chr1	80747222	80749054	-	1833	6	12	5	6	0	8	0	19	9	A630081D01Rik	ENSMUSG00000102721.1	1	ENSMUST00000195842.1	1	1832	0	1832	0	0	3
ENSMUSG00000099949.1	chr1	80897654	80898105	-	452	1	0	0	0	0	0	2	0	0	Gm29124	ENSMUSG00000099949.1	1	ENSMUST00000186576.1	1	451	0	451	0	0	3
ENSMUSG00000099918.1	chr1	80949426	80949897	+	472	0	0	0	0	0	0	0	0	0	Gm28066	ENSMUSG00000099918.1	1	ENSMUST00000188657.1	1	471	0	471	0	0	-1
ENSMUSG00000054976.14	chr1	81076950	81341764	+	12508	1291	1210	1068	1211	1288	1221	476	419	814	Nyap2	ENSMUSG00000054976.14	5	ENSMUST00000137862.7,ENSMUST00000123720.7,ENSMUST00000068275.11,ENSMUST00000113494.8,ENSMUST00000123285.1	7,7,5,6,7	3386,3464,4914,4534,7494	218598,218241,189433,218238,256687	1085,1085,2620,2134,5250	104258,104258,104258,104258,104258	1948,2044,2210,1948,2145	3,3,2,2,2
ENSMUSG00000104029.1	chr1	81520338	81522341	-	2004	0	9	0	0	0	3	0	0	0	Gm37210	ENSMUSG00000104029.1	1	ENSMUST00000192484.1	1	2003	0	2003	0	0	3
ENSMUSG00000101986.1	chr1	81554157	81557483	-	2929	0	3	1	0	2	0	0	0	0	Gm6198	ENSMUSG00000101986.1	1	ENSMUST00000191337.1	2	2927	399	1480	399	0	4
ENSMUSG00000087008.4	chr1	81741985	81742969	-	985	6	8	5	3	1	11	3	7	3	Gm5530	ENSMUSG00000087008.4	1	ENSMUST00000117185.1	1	984	0	984	0	0	3
ENSMUSG00000100561.1	chr1	81797241	81797946	+	706	4	6	0	2	1	0	1	0	0	Gm7516	ENSMUSG00000100561.1	1	ENSMUST00000186198.1	1	705	0	705	0	0	-1
ENSMUSG00000103571.1	chr1	82105180	82106983	+	1804	0	0	0	0	0	0	0	0	0	Gm37114	ENSMUSG00000103571.1	1	ENSMUST00000195065.1	1	1803	0	1803	0	0	-1
ENSMUSG00000098797.1	chr1	82131916	82132019	+	104	0	0	0	0	0	0	0	0	0	Mir6344	ENSMUSG00000098797.1	1	ENSMUST00000183462.1	1	103	0	103	0	0	-1
ENSMUSG00000055980.2	chr1	82233101	82291416	-	9144	15373	20588	18702	15686	17713	20695	19982	20825	24556	Irs1	ENSMUSG00000055980.2	1	ENSMUST00000069799.2	2	9142	49173	4639	49173	-3691	1
ENSMUSG00000022591.5	chr1	82233112	82235933	+	2822	0	0	0	0	0	0	0	0	0	Gm9747	ENSMUSG00000022591.5	1	ENSMUST00000023262.5	1	2821	0	2821	0	314	1
ENSMUSG00000026142.15	chr1	82316452	82445366	+	6966	884	1071	758	946	911	961	713	810	744	Rhbdd1	ENSMUSG00000026142.15	3	ENSMUST00000027322.13,ENSMUST00000187475.1,ENSMUST00000140020.1	7,1,7	3629,3088,3680	125285,0,102637	2503,3088,2503	65159,0,65159	942,0,942	2,-1,2
ENSMUSG00000104493.1	chr1	82352217	82355049	+	2833	10	21	21	38	17	22	36	46	46	Gm19552	ENSMUSG00000104493.1	1	ENSMUST00000194744.1	1	2832	0	2832	0	0	-1
ENSMUSG00000100786.1	chr1	82392493	82402746	-	1682	0	2	0	5	4	0	5	1	0	Gm28940	ENSMUSG00000100786.1	1	ENSMUST00000187929.1	3	1679	8574	1361	7303	0	5
ENSMUSG00000096779.1	chr1	82396697	82396817	-	121	0	0	0	0	0	0	0	0	0	Gm22112	ENSMUSG00000096779.1	1	ENSMUST00000117032.2	1	120	0	120	0	0	3
ENSMUSG00000067158.9	chr1	82448423	82586849	-	10612	57	72	85	83	73	78	43	48	57	Col4a4	ENSMUSG00000067158.9	2	ENSMUST00000087050.6,ENSMUST00000135271.1	48,7	10060,1256	128366,47009	4971,620	22099,22099	0,0	48,9
ENSMUSG00000079465.8	chr1	82586921	82722059	+	9967	33	25	38	24	16	23	22	21	30	Col4a3	ENSMUSG00000079465.8	4	ENSMUST00000141994.1,ENSMUST00000113457.8,ENSMUST00000125563.7,ENSMUST00000152664.1	2,52,4,4	1924,8502,520,623	54008,126581,3060,3055	1414,3259,172,182	54008,54008,1421,2388	0,4958,184,590	-1,1,-1,-1
ENSMUSG00000065055.1	chr1	82635013	82635110	+	98	0	0	0	0	0	0	0	0	0	n-R5s213	ENSMUSG00000065055.1	1	ENSMUST00000083121.1	1	97	0	97	0	0	-1
ENSMUSG00000097564.2	chr1	82691928	82725169	-	4343	11	14	5	24	11	15	15	11	30	C430014B12Rik	ENSMUSG00000097564.2	3	ENSMUST00000181720.1,ENSMUST00000186858.1,ENSMUST00000187869.1	4,2,1	997,655,3376	32192,4603,0	490,382,3376	26445,4603,0	0,0,0	6,4,3
ENSMUSG00000026150.14	chr1	82724890	82752394	+	9757	14390	15625	13097	13912	14193	15234	12664	12066	15373	Mff	ENSMUSG00000026150.14	16	ENSMUST00000078332.12,ENSMUST00000161572.7,ENSMUST00000073025.11,ENSMUST00000161648.7,ENSMUST00000162056.7,ENSMUST00000160786.7,ENSMUST00000162003.7,ENSMUST00000160972.7,ENSMUST00000160750.7,ENSMUST00000159279.7,ENSMUST00000160044.1,ENSMUST00000160744.1,ENSMUST00000160632.7,ENSMUST00000188333.1,ENSMUST00000162794.1,ENSMUST00000162573.2	9,4,8,8,5,8,11,5,7,4,4,4,5,1,3,2	1885,582,1698,1707,1956,1637,2076,1353,652,436,431,852,646,3917,604,2358	25615,10007,25770,25758,9838,25773,25370,21808,21717,12122,20824,15836,9434,0,4359,981	805,220,802,805,1309,765,809,805,169,169,169,573,337,3917,301,2215	6311,5983,11576,13433,4137,11576,5107,15013,10017,6311,15013,8544,3548,0,3378,981	869,0,714,726,0,711,943,652,0,0,0,410,0,0,0,0	3,-1,3,3,-1,3,4,1,-1,-1,-1,-1,-1,-1,-1,-1
ENSMUSG00000101450.1	chr1	82739691	82740707	+	1017	23	40	10	22	36	22	27	24	13	Gm28941	ENSMUSG00000101450.1	1	ENSMUST00000185536.1	1	1016	0	1016	0	0	-1
ENSMUSG00000026149.2	chr1	82756649	82768461	-	1508	0	0	0	0	0	0	0	0	0	Tm4sf20	ENSMUSG00000026149.2	2	ENSMUST00000027331.2,ENSMUST00000138787.1	4,3	1504,600	10308,10459	1062,309	4243,6216	0,0	4,5
ENSMUSG00000099771.1	chr1	82777028	82777210	-	183	0	0	0	0	0	0	0	0	0	Gm19257	ENSMUSG00000099771.1	1	ENSMUST00000186121.1	1	182	0	182	0	0	3
ENSMUSG00000102280.1	chr1	82806423	82807468	-	1046	0	0	0	0	0	0	0	0	0	Gm36999	ENSMUSG00000102280.1	1	ENSMUST00000192756.1	1	1045	0	1045	0	0	3
ENSMUSG00000100170.1	chr1	82819835	82820377	+	365	0	0	0	0	0	0	0	0	0	Gm28942	ENSMUSG00000100170.1	1	ENSMUST00000186334.1	2	363	179	241	179	0	-1
ENSMUSG00000100744.1	chr1	82822471	82822861	-	391	3	5	0	4	5	2	3	2	4	Gm17764	ENSMUSG00000100744.1	1	ENSMUST00000185925.1	1	390	0	390	0	0	3
ENSMUSG00000093782.1	chr1	82839446	82839498	+	53	15	33	12	17	8	17	21	8	26	Gm22396	ENSMUSG00000093782.1	1	ENSMUST00000177110.1	1	52	0	52	0	0	-1
ENSMUSG00000026159.13	chr1	82839483	82901182	+	8384	10352	11389	9590	10671	11441	11595	10537	10331	11660	Agfg1	ENSMUSG00000026159.13	8	ENSMUST00000189220.6,ENSMUST00000113444.7,ENSMUST00000190052.6,ENSMUST00000063380.10,ENSMUST00000187899.6,ENSMUST00000186302.6,ENSMUST00000190046.6,ENSMUST00000186043.1	13,12,13,13,12,13,14,6	8031,3130,2978,2883,2066,2339,1791,850	53668,53754,53734,53725,53781,53662,53597,39199	6183,1382,1382,1280,522,676,209,213	18467,18467,18467,18467,18467,18467,18467,18070	1667,1581,1601,1610,1554,1673,1727,0	1,1,1,1,1,1,-1,2
ENSMUSG00000101784.1	chr1	83003482	83004907	-	1426	2	3	0	2	2	4	0	0	2	Gm7553	ENSMUSG00000101784.1	1	ENSMUST00000185805.1	1	1425	0	1425	0	0	3
ENSMUSG00000038496.16	chr1	83012523	83038448	-	3065	31	32	62	26	28	50	43	36	41	Slc19a3	ENSMUSG00000038496.16	3	ENSMUST00000045560.14,ENSMUST00000142805.1,ENSMUST00000164473.1	7,4,6	2967,1888,1544	22958,5820,23087	1466,1465,807	10228,4488,11990	0,0,0	7,6,6
ENSMUSG00000100432.1	chr1	83015393	83016022	+	630	1	0	0	2	1	0	0	0	2	Gm7539	ENSMUSG00000100432.1	1	ENSMUST00000189789.1	1	629	0	629	0	0	-1
ENSMUSG00000100190.1	chr1	83041524	83042480	-	957	0	0	0	0	0	0	0	0	0	Krtap28-10	ENSMUSG00000100190.1	1	ENSMUST00000188323.1	1	956	0	956	0	0	3
ENSMUSG00000104423.1	chr1	83058286	83059378	-	1093	0	0	0	0	0	0	0	0	0	A030005K14Rik	ENSMUSG00000104423.1	1	ENSMUST00000193762.1	1	1092	0	1092	0	0	3
ENSMUSG00000101315.1	chr1	83060930	83061921	+	992	0	0	3	0	0	0	0	0	0	Krtap28-13	ENSMUSG00000101315.1	1	ENSMUST00000188005.1	1	991	0	991	0	416	1
ENSMUSG00000099691.1	chr1	83067102	83067473	+	372	0	0	0	0	0	0	0	0	0	Gm29518	ENSMUSG00000099691.1	1	ENSMUST00000190858.1	1	371	0	371	0	0	-1
ENSMUSG00000026166.14	chr1	83116766	83119167	+	1421	1	0	3	0	0	0	2	0	0	Ccl20	ENSMUSG00000026166.14	3	ENSMUST00000027351.12,ENSMUST00000113437.8,ENSMUST00000186832.1	3,4,4	1414,790,768	986,1603,1606	1167,471,471	897,894,897	306,290,287	1,1,1
ENSMUSG00000101173.1	chr1	83157984	83159017	+	398	0	1	0	0	0	0	0	0	0	Gm29519	ENSMUSG00000101173.1	1	ENSMUST00000186994.1	2	396	637	254	637	0	-1
ENSMUSG00000053161.16	chr1	83159752	83210574	+	2140	29	48	46	38	74	104	61	37	60	Daw1	ENSMUSG00000053161.16	5	ENSMUST00000133079.1,ENSMUST00000065436.9,ENSMUST00000113436.7,ENSMUST00000149342.7,ENSMUST00000065403.6	2,10,10,13,13	618,1339,1341,1626,1638	19454,49467,49471,49175,49155	531,413,415,415,419	19454,19455,19455,19455,19455	0,923,1061,210,1235	-1,1,1,1,1
ENSMUSG00000101896.1	chr1	83212044	83212884	-	841	1	1	0	3	1	2	2	1	2	Gm6244	ENSMUSG00000101896.1	1	ENSMUST00000178732.2	1	840	0	840	0	0	3
ENSMUSG00000084443.1	chr1	83216671	83216791	-	121	0	0	0	0	0	0	0	0	0	n-R5s214	ENSMUSG00000084443.1	1	ENSMUST00000122494.1	1	120	0	120	0	0	3
ENSMUSG00000026163.17	chr1	83254139	83408200	-	9602	1357	1792	1850	2109	1812	1610	2277	2146	3281	Sphkap	ENSMUSG00000026163.17	5	ENSMUST00000160953.7,ENSMUST00000159078.1,ENSMUST00000053075.14,ENSMUST00000160237.1,ENSMUST00000160567.1	11,6,10,3,2	8143,5882,5747,754,314	145918,17841,137291,68239,23008	3717,3547,3717,496,185	48506,8131,48506,45652,23008	0,1687,0,0,0	11,6,12,5,4
ENSMUSG00000079140.3	chr1	83314513	83315300	+	788	4	7	9	10	12	13	4	9	20	Gm6374	ENSMUSG00000079140.3	1	ENSMUST00000159051.1	1	787	0	787	0	0	-1
ENSMUSG00000104374.1	chr1	83331298	83332586	-	1289	0	1	0	7	3	0	3	8	3	Gm37517	ENSMUSG00000104374.1	1	ENSMUST00000194004.1	1	1288	0	1288	0	0	3
ENSMUSG00000104219.1	chr1	83426596	83427398	-	803	0	0	0	0	0	0	0	0	0	Gm37989	ENSMUSG00000104219.1	1	ENSMUST00000195202.1	1	802	0	802	0	0	3
ENSMUSG00000100580.6	chr1	83659550	83911644	-	2146	1	0	2	0	0	0	0	0	2	4933436I20Rik	ENSMUSG00000100580.6	2	ENSMUST00000189405.6,ENSMUST00000190615.1	5,8	1429,1501	250592,66541	856,642	116795,28491	0,0	7,10
ENSMUSG00000094946.1	chr1	83795912	83796032	+	121	0	0	0	0	0	0	0	0	0	Gm25754	ENSMUSG00000094946.1	1	ENSMUST00000178653.1	1	120	0	120	0	0	-1
ENSMUSG00000077736.1	chr1	83921918	83922041	+	124	0	0	0	0	0	0	0	0	0	Gm24555	ENSMUSG00000077736.1	1	ENSMUST00000104548.1	1	123	0	123	0	0	-1
ENSMUSG00000045658.16	chr1	84036296	84364180	-	8172	2739	2730	2782	3506	2915	2897	1910	1882	2631	Pid1	ENSMUSG00000045658.16	8	ENSMUST00000168574.8,ENSMUST00000176559.7,ENSMUST00000175948.1,ENSMUST00000176720.1,ENSMUST00000175996.7,ENSMUST00000176822.1,ENSMUST00000177458.1,ENSMUST00000187992.1	3,3,2,3,3,5,2,1	2661,1561,760,447,889,1114,2519,1430	245688,297381,14567,203397,255497,224664,124963,0	2211,1276,581,219,593,698,2249,1430	124963,176656,14567,124963,204652,148311,124963,0	0,0,0,0,0,0,0,0	3,3,4,3,3,5,2,3
ENSMUSG00000102750.1	chr1	84132867	84134510	-	1644	27	13	13	12	15	11	14	34	6	Gm37058	ENSMUSG00000102750.1	1	ENSMUST00000193393.1	1	1643	0	1643	0	0	3
ENSMUSG00000101934.1	chr1	84168188	84168733	+	546	0	0	0	0	0	0	0	0	0	Gm18304	ENSMUSG00000101934.1	1	ENSMUST00000189162.1	1	545	0	545	0	0	-1
ENSMUSG00000098851.1	chr1	84218849	84218961	-	113	3	10	11	12	12	8	16	11	14	Mir6353	ENSMUSG00000098851.1	1	ENSMUST00000183596.1	1	112	0	112	0	0	3
ENSMUSG00000036766.12	chr1	84369839	84696221	-	4784	5331	5417	4786	6669	6555	6971	4500	4584	6714	Dner	ENSMUSG00000036766.12	4	ENSMUST00000049126.12,ENSMUST00000191306.1,ENSMUST00000185606.2,ENSMUST00000191546.2	13,5,4,3	3619,2187,569,584	322763,159888,59201,40253	1036,1053,308,308	109832,109832,54804,38038	0,0,0,0	13,7,6,5
ENSMUSG00000104396.1	chr1	84392503	84395399	-	2897	44	18	31	42	30	28	17	18	45	Gm37959	ENSMUSG00000104396.1	1	ENSMUST00000191700.1	1	2896	0	2896	0	0	3
ENSMUSG00000102481.1	chr1	84665189	84669443	-	4255	57	51	34	64	53	60	47	79	94	Gm37925	ENSMUSG00000102481.1	1	ENSMUST00000195352.1	1	4254	0	4254	0	0	3
ENSMUSG00000093254.1	chr1	84695839	84695915	+	77	0	0	0	0	0	0	0	0	0	Mir5126	ENSMUSG00000093254.1	1	ENSMUST00000175513.1	1	76	0	76	0	0	-1
ENSMUSG00000026219.14	chr1	84721189	84840516	-	16601	56953	70397	63082	59166	62676	72288	54200	62431	70550	Trip12	ENSMUSG00000026219.14	18	ENSMUST00000027421.12,ENSMUST00000186465.6,ENSMUST00000189670.6,ENSMUST00000186648.6,ENSMUST00000187733.1,ENSMUST00000191187.1,ENSMUST00000185720.1,ENSMUST00000189841.1,ENSMUST00000190125.1,ENSMUST00000185909.6,ENSMUST00000186894.6,ENSMUST00000185567.1,ENSMUST00000185672.1,ENSMUST00000190464.6,ENSMUST00000190474.1,ENSMUST00000189496.6,ENSMUST00000190067.6,ENSMUST00000187818.1	41,41,18,41,7,2,2,5,2,8,20,2,2,7,1,6,3,3	9591,9549,2829,6401,858,857,2240,519,376,1633,3053,2511,680,633,1937,1386,518,362	108524,109778,22184,108623,6268,1809,927,9157,1009,88459,81848,1024,84,26931,0,55088,45761,44138	3625,3625,550,802,237,751,2089,172,191,789,802,1301,556,148,1937,802,340,146	24260,25514,4855,24260,2243,1809,927,4611,1009,41612,24260,1024,84,7586,0,24260,25265,23642	0,0,356,0,760,0,0,227,0,0,0,0,0,0,0,0,0,0	41,41,18,41,2,4,4,3,4,5,22,4,4,9,3,8,5,5
ENSMUSG00000103505.1	chr1	84807158	84809190	-	2033	85	80	58	134	143	93	42	79	42	Gm38374	ENSMUSG00000103505.1	1	ENSMUST00000194417.1	1	2032	0	2032	0	0	3
ENSMUSG00000104503.1	chr1	84819968	84824683	-	4716	85	124	47	126	94	58	166	248	222	Gm37738	ENSMUSG00000104503.1	1	ENSMUST00000192396.1	1	4715	0	4715	0	0	3
ENSMUSG00000073633.9	chr1	84839841	84900487	+	2148	111	214	208	172	221	191	183	268	267	Fbxo36	ENSMUSG00000073633.9	4	ENSMUST00000097672.3,ENSMUST00000143656.7,ENSMUST00000139562.7,ENSMUST00000151737.1	4,5,4,4	897,1083,877,1709	59749,59551,33174,29627	490,490,490,939	41124,33014,15290,15290	563,0,0,0	1,-1,-1,-1
ENSMUSG00000026220.6	chr1	84905898	84935134	-	3352	966	1288	1085	908	1230	1417	1338	1513	2116	Slc16a14	ENSMUSG00000026220.6	2	ENSMUST00000027422.6,ENSMUST00000186980.1	5,2	3202,374	26034,5149	1531,230	9681,5149	0,0	5,4
ENSMUSG00000096802.1	chr1	84963669	84964559	+	891	0	0	2	0	0	4	0	0	0	Gm15433	ENSMUSG00000096802.1	1	ENSMUST00000097671.1	1	890	0	890	0	0	-1
ENSMUSG00000099693.1	chr1	84990638	84993032	-	255	0	0	0	0	0	0	0	0	0	Gm29284	ENSMUSG00000099693.1	1	ENSMUST00000188363.1	3	252	2142	142	1699	0	5
ENSMUSG00000052477.15	chr1	84992690	85270566	-	3827	0	2	0	0	4	15	0	8	7	C130026I21Rik	ENSMUSG00000052477.15	7	ENSMUST00000159114.1,ENSMUST00000161267.7,ENSMUST00000162421.1,ENSMUST00000161685.7,ENSMUST00000159582.7,ENSMUST00000093506.11,ENSMUST00000064341.8	3,3,3,4,7,8,7	553,649,588,805,732,1940,1554	253154,157262,149064,12457,23771,22259,22342	386,342,235,611,171,792,533	252564,156378,148180,6402,9134,9134,9134	0,0,0,597,0,0,0	5,3,3,4,9,8,7
ENSMUSG00000064281.7	chr1	85012114	85012704	+	591	29	47	14	37	19	29	21	22	23	Rpl19-ps1	ENSMUSG00000064281.7	1	ENSMUST00000121059.1	1	590	0	590	0	0	-1
ENSMUSG00000098842.1	chr1	85012367	85012446	+	80	11	21	7	17	3	7	10	10	7	Gm27907	ENSMUSG00000098842.1	1	ENSMUST00000185101.1	1	79	0	79	0	0	-1
ENSMUSG00000061852.8	chr1	85027954	85041958	-	603	0	0	0	0	0	7	1	4	1	Gm7582	ENSMUSG00000061852.8	1	ENSMUST00000160831.2	4	599	13405	178	10198	0	6
ENSMUSG00000089976.1	chr1	85061154	85062642	+	189	0	0	0	0	0	0	0	0	0	Gm2389	ENSMUSG00000089976.1	1	ENSMUST00000160487.1	2	187	1301	98	1301	0	-1
ENSMUSG00000101279.1	chr1	85067394	85080236	-	694	3	0	0	0	0	0	0	0	0	Gm18342	ENSMUSG00000101279.1	1	ENSMUST00000186987.1	8	686	12156	142	3872	0	10
ENSMUSG00000089844.7	chr1	85083069	85109853	-	1603	1	1	0	2	0	10	3	4	7	A530032D15Rik	ENSMUSG00000089844.7	3	ENSMUST00000161724.7,ENSMUST00000160792.7,ENSMUST00000161675.2	8,7,4	781,1485,488	25599,19961,9881	171,516,171	8643,8643,8643	0,0,0	7,7,6
ENSMUSG00000073631.1	chr1	85100164	85100535	+	372	0	0	0	0	0	0	0	0	0	Gm10553	ENSMUSG00000073631.1	1	ENSMUST00000097669.1	1	371	0	371	0	371	1
ENSMUSG00000072109.11	chr1	85105946	85114035	+	2323	2	0	1	3	0	9	1	1	2	A530040E14Rik	ENSMUSG00000072109.11	6	ENSMUST00000162353.7,ENSMUST00000093501.9,ENSMUST00000162453.7,ENSMUST00000161666.7,ENSMUST00000159087.7,ENSMUST00000161150.2	4,6,5,3,6,3	2013,1509,822,708,1242,1259	6073,5892,5997,6223,5878,954	985,988,416,536,727,978	5119,4200,4800,5761,4800,492	0,0,0,0,0,0	-1,-1,-1,-1,-1,-1
ENSMUSG00000090128.1	chr1	85115319	85117237	+	193	0	0	0	3	0	0	0	0	0	Gm16038	ENSMUSG00000090128.1	1	ENSMUST00000159317.1	2	191	1727	142	1727	0	-1
ENSMUSG00000091199.9	chr1	85156809	85327306	-	764	0	0	0	0	0	8	0	0	0	Gm2619	ENSMUSG00000091199.9	2	ENSMUST00000166777.3,ENSMUST00000162276.9	5,4	646,388	169851,18238	178,159	156630,9973	0,0	7,6
ENSMUSG00000089716.7	chr1	85159764	85194260	+	1474	6	17	4	0	0	2	0	0	0	Gm6264	ENSMUSG00000089716.7	2	ENSMUST00000160802.7,ENSMUST00000162896.1	6,13	618,1204	10773,32193	256,143	4770,9232	0,0	-1,-1
ENSMUSG00000079457.9	chr1	85199613	85213786	+	2496	0	0	0	0	0	0	0	0	0	Gm7609	ENSMUSG00000079457.9	4	ENSMUST00000160058.7,ENSMUST00000113407.9,ENSMUST00000161424.2,ENSMUST00000113402.3	2,3,4,4	1140,850,457,1534	2418,12737,13383,12544	1031,573,178,1159	2418,10319,10322,5696	0,0,0,0	-1,-1,-1,-1
ENSMUSG00000090252.1	chr1	85246851	85255465	+	890	0	0	0	0	0	1	0	0	0	Gm16028	ENSMUSG00000090252.1	1	ENSMUST00000162347.1	2	888	7726	542	7726	0	-1
ENSMUSG00000079455.9	chr1	85266698	85285491	+	4005	0	0	0	0	0	1	0	0	0	Gm16026	ENSMUSG00000079455.9	6	ENSMUST00000163068.7,ENSMUST00000162652.7,ENSMUST00000162923.7,ENSMUST00000159849.7,ENSMUST00000094774.4,ENSMUST00000159695.1	4,5,5,2,3,7	2737,678,636,826,577,765	8379,8797,9576,303,2448,9619	2326,153,150,676,278,168	5547,5547,5547,303,2145,2862	0,0,0,0,0,0	-1,-1,-1,-1,-1,-1
ENSMUSG00000089652.1	chr1	85326729	85342615	+	2425	0	0	1	0	3	1	4	0	0	Gm16025	ENSMUSG00000089652.1	2	ENSMUST00000161923.1,ENSMUST00000161282.1	2,1	2423,183	13463,0	2231,183	13463,0	0,0	-1,-1
ENSMUSG00000089937.1	chr1	85332716	85342086	-	543	0	0	0	0	0	0	0	0	0	Gm7281	ENSMUSG00000089937.1	1	ENSMUST00000160010.1	5	538	8832	142	7659	0	7
ENSMUSG00000096292.1	chr1	85484252	85485142	-	891	0	0	0	0	0	0	0	0	0	Gm2666	ENSMUSG00000096292.1	1	ENSMUST00000160587.1	1	890	0	890	0	0	3
ENSMUSG00000101751.1	chr1	85501090	85514604	+	881	0	0	0	0	0	4	0	0	0	Gm2427	ENSMUSG00000101751.1	1	ENSMUST00000189121.1	9	872	12642	143	3170	0	-1
ENSMUSG00000089714.1	chr1	85511133	85527161	-	2405	4	2	2	1	2	5	0	1	0	Gm16092	ENSMUSG00000089714.1	1	ENSMUST00000161449.1	2	2403	13625	2213	13625	0	4
ENSMUSG00000090186.5	chr1	85526690	85550577	+	627	0	0	0	0	0	0	0	0	0	Gm7592	ENSMUSG00000090186.5	1	ENSMUST00000160674.1	5	622	23265	178	10466	0	-1
ENSMUSG00000094127.1	chr1	85575676	85577295	+	420	0	0	0	0	0	0	0	0	0	G530012D18Rik	ENSMUSG00000094127.1	1	ENSMUST00000178024.1	2	418	1201	391	1201	418	-1
ENSMUSG00000070034.13	chr1	85576899	85598817	-	6781	44	66	66	64	51	74	52	60	72	Sp110	ENSMUSG00000070034.13	9	ENSMUST00000128339.7,ENSMUST00000093508.6,ENSMUST00000131950.7,ENSMUST00000186740.1,ENSMUST00000143363.7,ENSMUST00000152399.7,ENSMUST00000151690.7,ENSMUST00000150114.7,ENSMUST00000130727.1	7,12,11,3,3,3,3,3,2	2303,1909,2282,556,2580,571,579,496,828	9989,20009,19564,4365,2755,2755,2369,1070,233	1392,446,688,388,2283,274,278,227,678	3767,3767,3767,3767,2520,2520,2136,837,233	0,0,0,0,0,0,0,0,0	9,12,13,5,5,5,5,5,4
ENSMUSG00000090103.1	chr1	85599286	85599839	+	427	0	0	0	0	0	0	0	0	0	Gm16094	ENSMUSG00000090103.1	1	ENSMUST00000162784.1	2	425	128	256	128	0	-1
ENSMUSG00000070031.11	chr1	85600378	85645037	+	3328	59	66	64	71	38	84	61	74	56	Sp140	ENSMUSG00000070031.11	6	ENSMUST00000113385.2,ENSMUST00000080204.10,ENSMUST00000162925.1,ENSMUST00000161497.1,ENSMUST00000159234.1,ENSMUST00000160119.1	4,17,8,6,4,2	481,2400,588,808,723,805	9923,41934,19118,11656,6783,1238	221,488,101,358,348,448	8503,8503,4785,3868,3868,1238	130,1588,472,548,0,0	1,1,-1,-1,-1,-1
ENSMUSG00000073628.5	chr1	85604085	85611896	-	1056	0	0	0	0	0	0	0	0	0	Gm10552	ENSMUSG00000073628.5	2	ENSMUST00000161763.1,ENSMUST00000113396.2	3,1	714,371	7097,0	355,371	5752,0	0,0	5,3
ENSMUSG00000090246.1	chr1	85641222	85650585	-	2405	8	6	4	2	5	5	4	3	11	Gm17017	ENSMUSG00000090246.1	1	ENSMUST00000161540.1	2	2403	6960	2213	6960	0	4
ENSMUSG00000026222.16	chr1	85649988	85709998	+	7556	44	74	79	47	31	99	24	67	59	Sp100	ENSMUSG00000026222.16	13	ENSMUST00000141998.1,ENSMUST00000155094.7,ENSMUST00000145440.7,ENSMUST00000054279.14,ENSMUST00000147552.7,ENSMUST00000153574.7,ENSMUST00000150967.7,ENSMUST00000066427.10,ENSMUST00000129951.7,ENSMUST00000140758.1,ENSMUST00000134283.1,ENSMUST00000132641.7,ENSMUST00000141709.1	3,17,13,12,16,17,14,20,6,3,3,10,5	696,1649,3794,1966,1581,1636,1329,2688,827,392,538,1187,404	12187,49924,42566,31138,49977,57548,49795,57260,10064,5217,5194,13922,4149	398,168,2109,901,168,205,168,1005,499,267,370,413,117	9576,10836,10836,9576,12866,13120,15150,10836,3793,3793,2697,3500,1779	0,1432,906,1035,1379,1468,0,1756,0,0,0,899,0	-1,1,1,1,1,1,1,1,-1,-1,-1,-1,-1
ENSMUSG00000064414.1	chr1	85674882	85674985	+	104	0	0	0	0	0	0	0	0	2	n-R5s215	ENSMUSG00000064414.1	1	ENSMUST00000082480.1	1	103	0	103	0	0	-1
ENSMUSG00000052760.15	chr1	85717083	85778643	-	2709	42	69	66	59	52	219	56	72	103	A630001G21Rik	ENSMUSG00000052760.15	6	ENSMUST00000159320.7,ENSMUST00000159122.7,ENSMUST00000064788.13,ENSMUST00000162038.7,ENSMUST00000161453.1,ENSMUST00000159325.1	6,8,6,6,4,4	1792,2045,1347,1502,547,380	17706,59515,17593,17387,17917,9567	1285,1285,679,676,278,184	9970,47445,9857,9857,13291,8225	0,0,0,0,0,0	8,8,6,4,6,6
ENSMUSG00000098634.1	chr1	85751948	85752074	+	127	0	0	0	0	0	0	0	0	0	Mir8096	ENSMUSG00000098634.1	1	ENSMUST00000184526.1	1	126	0	126	0	0	-1
ENSMUSG00000094834.1	chr1	85763794	85763871	+	78	0	0	0	0	0	0	0	0	0	Gm25472	ENSMUSG00000094834.1	1	ENSMUST00000175454.3	1	77	0	77	0	0	-1
ENSMUSG00000100217.1	chr1	85775271	85784694	+	821	0	0	0	0	0	0	0	0	0	9930111H07Rik	ENSMUSG00000100217.1	1	ENSMUST00000187270.1	4	817	8606	633	3892	0	-1
ENSMUSG00000092932.2	chr1	85784713	85784962	+	250	0	0	0	0	0	0	0	0	0	Gm22906	ENSMUSG00000092932.2	1	ENSMUST00000175191.2	1	249	0	249	0	0	-1
ENSMUSG00000036707.16	chr1	85793441	85851576	+	7077	55913	67551	56067	57596	61876	64943	42711	49200	54048	Cab39	ENSMUSG00000036707.16	5	ENSMUST00000113360.7,ENSMUST00000126962.2,ENSMUST00000130754.7,ENSMUST00000097666.3,ENSMUST00000187623.1	9,4,4,10,1	3796,576,433,2359,2990	54339,24396,42417,53495,0	2543,280,164,1332,2990	24536,19891,23808,22884,0	1018,0,0,1018,0	2,4,2,3,-1
ENSMUSG00000026223.15	chr1	85894281	85908675	+	2491	16467	18986	16603	14188	15049	17401	18758	16328	23108	Itm2c	ENSMUSG00000026223.15	3	ENSMUST00000027425.15,ENSMUST00000185569.1,ENSMUST00000139837.1	6,5,3	2224,1460,765	12170,12280,865	1128,812,371	8221,8221,476	804,694,0	1,1,-1
ENSMUSG00000026224.11	chr1	85928483	85940624	+	3343	230	214	184	235	185	187	219	230	278	4933407L21Rik	ENSMUSG00000026224.11	3	ENSMUST00000027426.10,ENSMUST00000129392.1,ENSMUST00000188949.1	3,3,1	1143,500,2868	2128,11397,0	609,365,2868	1379,10018,0	393,186,0	1,1,-1
ENSMUSG00000099767.1	chr1	85933247	85937332	-	3994	0	1	0	1	0	2	7	5	9	Gm28884	ENSMUSG00000099767.1	1	ENSMUST00000190367.1	2	3992	93	2874	93	0	4
ENSMUSG00000049608.8	chr1	85938318	85961007	-	3721	0	3	9	6	0	0	2	1	19	Gpr55	ENSMUSG00000049608.8	1	ENSMUST00000086975.5	2	3719	18970	3547	18970	-979	2
ENSMUSG00000100108.1	chr1	85972365	85986917	-	582	0	0	0	0	0	0	0	0	0	Gm28100	ENSMUSG00000100108.1	1	ENSMUST00000186560.1	4	578	13974	191	11388	0	6
ENSMUSG00000099342.1	chr1	86014403	86015886	-	1484	111	98	104	83	128	79	122	142	179	Gm18180	ENSMUSG00000099342.1	1	ENSMUST00000187562.1	1	1483	0	1483	0	0	3
ENSMUSG00000026226.15	chr1	86016816	86029958	+	2041	2	1	2	1	0	0	0	0	2	Spata3	ENSMUSG00000026226.15	11	ENSMUST00000129169.1,ENSMUST00000149469.1,ENSMUST00000052854.12,ENSMUST00000125083.1,ENSMUST00000152501.7,ENSMUST00000113344.7,ENSMUST00000130504.7,ENSMUST00000153247.2,ENSMUST00000159876.7,ENSMUST00000135440.1,ENSMUST00000131151.2	2,3,4,2,2,4,4,3,4,2,4	595,310,1103,702,741,1043,1096,881,756,730,610	7258,10245,6913,2021,1981,4189,6916,7087,6546,1978,6549	342,143,407,363,403,403,403,396,389,388,244	7258,7590,3022,2021,1981,1981,3022,4065,2655,1978,2655	0,0,579,268,511,576,576,415,579,514,520	-1,-1,1,1,1,1,1,1,1,1,-1
ENSMUSG00000026227.11	chr1	86045863	86055456	+	3331	1465	1653	2302	1920	2282	2321	416	599	789	2810459M11Rik	ENSMUSG00000026227.11	2	ENSMUST00000027429.10,ENSMUST00000165824.2	3,3	1222,3328	6268,6265	709,2506	4249,4249	858,861	1,1
ENSMUSG00000026229.17	chr1	86064387	86139151	+	7265	56903	68371	56146	59892	56811	62710	59036	63807	69422	Psmd1	ENSMUSG00000026229.17	9	ENSMUST00000147807.7,ENSMUST00000143200.7,ENSMUST00000139715.7,ENSMUST00000027432.8,ENSMUST00000189234.1,ENSMUST00000133480.7,ENSMUST00000127104.1,ENSMUST00000152184.1,ENSMUST00000149946.1	2,4,21,25,1,4,5,7,3	611,609,2497,3087,3021,686,440,932,583	5778,6664,65633,71445,0,6906,10508,21051,4317	418,418,226,226,3021,457,169,251,438	5778,5778,22235,22235,0,5778,5577,7830,2332	0,0,143,2838,0,0,0,0,0	-1,-1,1,1,-1,-1,-1,-1,-1
ENSMUSG00000077274.1	chr1	86087301	86087422	+	122	739	614	620	533	740	664	841	791	776	Gm22786	ENSMUSG00000077274.1	1	ENSMUST00000104086.1	1	121	0	121	0	0	-1
ENSMUSG00000026228.6	chr1	86099026	86111970	-	2131	0	0	0	4	0	0	0	0	0	Htr2b	ENSMUSG00000026228.6	2	ENSMUST00000027431.6,ENSMUST00000155077.1	4,3	2079,517	10865,10054	1206,248	7912,7912	0,0	4,5
ENSMUSG00000103272.1	chr1	86120883	86123561	+	2679	68	76	43	94	90	76	65	61	52	Gm37914	ENSMUSG00000103272.1	1	ENSMUST00000195317.1	1	2678	0	2678	0	0	-1
ENSMUSG00000094638.1	chr1	86133637	86162788	+	776	16868	20793	18482	18126	16907	18013	17837	18224	21643	Gm21972	ENSMUSG00000094638.1	1	ENSMUST00000135197.1	6	770	28381	153	17595	293	-1
ENSMUSG00000062590.13	chr1	86154780	86278284	+	13006	2893	3404	2883	3026	3047	3369	2643	2833	3213	Armc9	ENSMUSG00000062590.13	13	ENSMUST00000123618.7,ENSMUST00000155168.7,ENSMUST00000135973.7,ENSMUST00000153389.7,ENSMUST00000134858.7,ENSMUST00000113309.8,ENSMUST00000186509.6,ENSMUST00000027434.14,ENSMUST00000131412.7,ENSMUST00000153653.1,ENSMUST00000150059.7,ENSMUST00000156675.7,ENSMUST00000126579.1	20,19,22,6,10,25,4,25,21,9,9,5,4	3618,2416,4674,1018,2671,3530,400,5102,2139,1724,755,526,546	87928,56467,100369,14527,22381,118369,9638,118372,95535,21158,55247,49467,23974	1760,617,2601,421,1715,1037,141,2624,212,887,139,212,180	31461,9193,31461,5059,5059,31461,4573,31461,31461,5059,25668,31461,12556	0,0,0,0,0,2433,0,2430,1981,0,0,433,190	-1,-1,-1,-1,-1,2,2,2,2,-1,-1,-1,-1
ENSMUSG00000087538.1	chr1	86275509	86301375	-	377	0	0	0	1	0	0	0	0	0	Gm16341	ENSMUSG00000087538.1	1	ENSMUST00000126385.1	4	373	25493	220	9676	0	6
ENSMUSG00000079445.3	chr1	86302832	86307305	+	4137	40	58	25	60	40	25	110	79	148	B3gnt7	ENSMUSG00000079445.3	3	ENSMUST00000189618.1,ENSMUST00000113306.3,ENSMUST00000188695.1	1,2,2	1875,2580,1521	0,1491,797	1875,2260,804	0,1491,797	0,1192,0	-1,1,2
ENSMUSG00000099644.1	chr1	86303195	86304059	-	520	1	1	0	0	0	1	0	2	0	Gm28626	ENSMUSG00000099644.1	1	ENSMUST00000187004.1	2	518	346	423	346	0	4
ENSMUSG00000091806.1	chr1	86323267	86323593	+	327	0	0	0	0	0	0	0	0	0	Gm5258	ENSMUSG00000091806.1	1	ENSMUST00000165437.1	1	326	0	326	0	0	-1
ENSMUSG00000101853.1	chr1	86328039	86328873	+	453	0	0	0	0	0	0	0	0	0	Gm28627	ENSMUSG00000101853.1	1	ENSMUST00000186141.1	2	451	383	292	383	0	-1
ENSMUSG00000026234.12	chr1	86344719	86359400	-	10188	47923	74508	49557	61907	52117	54404	56704	71584	73783	Ncl	ENSMUSG00000026234.12	6	ENSMUST00000027438.7,ENSMUST00000185676.6,ENSMUST00000188682.1,ENSMUST00000186050.1,ENSMUST00000189504.1,ENSMUST00000185785.1	14,12,2,3,2,3	8188,3060,599,1051,500,658	6493,5809,116,448,705,999	5977,1082,399,696,392,402	1165,1165,116,332,705,655	0,0,0,0,0,0	14,14,4,5,4,5
ENSMUSG00000064837.1	chr1	86351169	86351301	-	133	474	590	367	380	380	417	392	408	554	Snora75	ENSMUSG00000064837.1	1	ENSMUST00000082903.1	1	132	0	132	0	0	3
ENSMUSG00000104627.1	chr1	86351981	86352127	-	147	101	96	65	132	116	84	87	122	122	Mir3535	ENSMUSG00000104627.1	1	ENSMUST00000197651.1	1	146	0	146	0	0	3
ENSMUSG00000064696.1	chr1	86352008	86352087	-	80	96	86	60	98	103	76	67	119	103	Gm24148	ENSMUSG00000064696.1	1	ENSMUST00000082762.1	1	79	0	79	0	0	3
ENSMUSG00000064823.1	chr1	86356261	86356330	-	70	1837	1879	1295	1037	1665	1545	1387	1404	1086	Snord82	ENSMUSG00000064823.1	1	ENSMUST00000082889.1	1	69	0	69	0	0	3
ENSMUSG00000073627.7	chr1	86359574	86373791	+	6437	641	1045	397	832	564	843	738	900	832	C130036L24Rik	ENSMUSG00000073627.7	3	ENSMUST00000127284.1,ENSMUST00000137643.1,ENSMUST00000190804.1	2,3,1	1264,3106,3184	7126,11101,0	831,2405,3184	7126,7434,0	0,0,0	-1,-1,-1
ENSMUSG00000110510.1	chr1	86377100	86378276	-	1177	0	0	0	0	0	0	0	6	0	RP23-403I3.7	ENSMUSG00000110510.1	1	ENSMUST00000212977.1	1	1176	0	1176	0	0	3
ENSMUSG00000026237.5	chr1	86386303	86426228	-	1695	2	6	0	2	3	5	0	0	1	Nmur1	ENSMUSG00000026237.5	4	ENSMUST00000212541.1,ENSMUST00000027440.5,ENSMUST00000212058.1,ENSMUST00000212614.1	4,2,3,2	1530,1216,1284,517	38395,600,1735,9826	894,828,894,360	32753,600,1135,9826	0,2,0,0	4,2,3,4
ENSMUSG00000036574.5	chr1	86426329	86428052	+	1724	1	0	0	0	0	0	0	0	1	1700019O17Rik	ENSMUSG00000036574.5	1	ENSMUST00000046004.5	1	1723	0	1723	0	1592	1
ENSMUSG00000101328.1	chr1	86473659	86474006	+	348	0	0	0	0	0	2	0	1	0	Rpl30-ps6	ENSMUSG00000101328.1	1	ENSMUST00000163337.3	1	347	0	347	0	0	-1
ENSMUSG00000026238.14	chr1	86526726	86530712	+	1462	314617	429813	407809	317302	321081	359140	271601	250322	309364	Ptma	ENSMUSG00000026238.14	5	ENSMUST00000045897.14,ENSMUST00000186255.6,ENSMUST00000188699.6,ENSMUST00000186932.1,ENSMUST00000188533.1	5,4,5,5,5	1211,764,599,471,588	2775,2871,2191,2533,2814	747,406,213,209,205	2223,2223,899,1825,2223	331,174,0,0,292	1,1,1,-1,1
ENSMUSG00000026239.14	chr1	86542994	86582629	-	2178	2019	2493	2075	2193	2331	2487	1787	1731	2172	Pde6d	ENSMUSG00000026239.14	5	ENSMUST00000027444.14,ENSMUST00000148683.1,ENSMUST00000143674.7,ENSMUST00000150653.1,ENSMUST00000146220.1	5,4,5,5,4	1154,1165,1301,464,875	38399,38388,38306,38533,36280	589,592,561,125,415	34683,34683,34683,17801,34683	0,0,0,0,0	5,6,2,7,4
ENSMUSG00000102927.1	chr1	86580058	86581232	+	1175	0	0	0	0	0	0	0	0	0	Gm37152	ENSMUSG00000102927.1	1	ENSMUST00000193369.1	1	1174	0	1174	0	0	-1
ENSMUSG00000026240.12	chr1	86582904	86609375	+	5515	4835	5743	4616	4860	5068	4841	4718	4722	5516	Cops7b	ENSMUSG00000026240.12	6	ENSMUST00000121534.7,ENSMUST00000149542.1,ENSMUST00000027446.10,ENSMUST00000138280.7,ENSMUST00000122884.1,ENSMUST00000127219.1	8,4,7,6,6,3	5375,626,2224,1944,2572,283	21096,5729,17176,17251,17264,4141	4317,219,1442,1268,1920,103	4385,3920,4385,7410,6637,2263	789,0,789,187,309,0	3,1,2,2,2,-1
ENSMUSG00000084468.1	chr1	86637552	86637608	-	57	0	0	0	0	0	0	0	0	0	Gm22955	ENSMUSG00000084468.1	1	ENSMUST00000122519.1	1	56	0	56	0	0	3
ENSMUSG00000103609.1	chr1	86638201	86640454	+	2254	1	0	0	0	0	0	1	3	2	Gm37022	ENSMUSG00000103609.1	1	ENSMUST00000192517.1	1	2253	0	2253	0	0	-1
ENSMUSG00000026241.5	chr1	86666291	86670571	-	1042	29	50	51	52	32	33	53	23	58	Nppc	ENSMUSG00000026241.5	1	ENSMUST00000027449.5	3	1039	3241	507	2846	0	2
ENSMUSG00000053333.15	chr1	86703808	87050095	+	8901	8807	10668	9242	9431	8352	8978	3766	4190	4259	Dis3l2	ENSMUSG00000053333.15	6	ENSMUST00000188121.6,ENSMUST00000168237.7,ENSMUST00000189044.6,ENSMUST00000190618.6,ENSMUST00000065694.7,ENSMUST00000186682.1	4,22,11,21,21,1	1169,3132,5230,2948,3064,734	43354,343144,173381,342419,343185,0	802,472,4036,362,469,734	40810,52178,40810,52178,60833,0	0,2634,0,367,2593,0	-1,2,-1,2,2,-1
ENSMUSG00000100225.1	chr1	86764944	86765365	-	422	0	0	0	0	0	0	0	0	0	Gm29097	ENSMUSG00000100225.1	1	ENSMUST00000190273.1	1	421	0	421	0	0	3
ENSMUSG00000100768.1	chr1	86774819	86776528	+	1710	40	25	9	50	40	19	12	18	23	Gm29055	ENSMUSG00000100768.1	1	ENSMUST00000186337.1	1	1709	0	1709	0	0	-1
ENSMUSG00000104121.1	chr1	86801075	86804027	+	2953	19	18	21	48	15	33	19	26	8	Gm37485	ENSMUSG00000104121.1	1	ENSMUST00000192326.1	1	2952	0	2952	0	0	-1
ENSMUSG00000102383.1	chr1	86826101	86829655	+	3555	26	32	27	21	45	29	19	26	38	Gm38142	ENSMUSG00000102383.1	1	ENSMUST00000194093.1	1	3554	0	3554	0	0	-1
ENSMUSG00000104400.1	chr1	86834995	86837778	+	2784	14	6	11	13	9	24	9	7	15	Gm38010	ENSMUSG00000104400.1	1	ENSMUST00000192592.1	1	2783	0	2783	0	0	-1
ENSMUSG00000102293.1	chr1	86874350	86876664	+	2315	10	7	11	3	5	12	0	6	1	Gm37541	ENSMUSG00000102293.1	1	ENSMUST00000192464.1	1	2314	0	2314	0	0	-1
ENSMUSG00000102649.1	chr1	86893573	86895132	+	1560	9	21	7	6	7	4	5	15	10	Gm38021	ENSMUSG00000102649.1	1	ENSMUST00000195687.1	1	1559	0	1559	0	0	-1
ENSMUSG00000084106.4	chr1	86908793	86909683	-	891	112	140	90	159	135	127	124	145	116	Gm6136	ENSMUSG00000084106.4	1	ENSMUST00000120149.1	1	890	0	890	0	0	3
ENSMUSG00000102571.1	chr1	86917992	86920656	+	2665	8	12	7	6	12	3	4	7	13	Gm37967	ENSMUSG00000102571.1	1	ENSMUST00000195634.1	1	2664	0	2664	0	0	-1
ENSMUSG00000099401.1	chr1	86929387	87057596	-	430	0	0	0	0	0	0	0	0	0	Gm28375	ENSMUSG00000099401.1	1	ENSMUST00000185304.1	4	426	127783	194	125017	0	6
ENSMUSG00000102956.1	chr1	86988270	86989016	+	747	1	0	0	3	3	0	4	0	0	Gm37017	ENSMUSG00000102956.1	1	ENSMUST00000195266.1	1	746	0	746	0	0	-1
ENSMUSG00000103984.1	chr1	87036723	87039650	+	2928	51	30	20	69	33	47	11	24	15	Gm37447	ENSMUSG00000103984.1	1	ENSMUST00000195625.1	1	2927	0	2927	0	0	-1
ENSMUSG00000101940.2	chr1	87067672	87071098	+	2075	3	0	0	1	0	0	0	2	5	Akp-ps1	ENSMUSG00000101940.2	2	ENSMUST00000212812.1,ENSMUST00000188050.1	11,11	1948,1589	1478,1381	424,289	231,231	0,0	-1,-1
ENSMUSG00000101625.1	chr1	87080171	87096418	+	885	0	0	0	0	0	0	0	0	0	Gm29371	ENSMUSG00000101625.1	1	ENSMUST00000186823.1	2	883	15364	762	15364	0	-1
ENSMUSG00000026246.12	chr1	87086694	87089928	-	2256	0	0	0	0	0	0	0	0	0	Alppl2	ENSMUSG00000026246.12	3	ENSMUST00000027455.12,ENSMUST00000188310.1,ENSMUST00000190082.1	11,12,3	2081,2004,641	1136,1229,384	646,645,344	216,216,295	0,0,0	11,12,5
ENSMUSG00000079440.2	chr1	87098002	87101606	-	2337	0	0	0	0	0	0	0	0	0	Alpi	ENSMUSG00000079440.2	1	ENSMUST00000113270.2	11	2326	1278	962	244	0	11
ENSMUSG00000100940.1	chr1	87116321	87117158	-	364	0	0	0	0	0	0	0	0	0	Gm29372	ENSMUSG00000100940.1	1	ENSMUST00000191416.1	2	362	475	240	475	0	4
ENSMUSG00000036500.4	chr1	87124973	87127912	+	2099	0	0	0	0	0	0	0	0	0	Akp3	ENSMUSG00000036500.4	2	ENSMUST00000187662.1,ENSMUST00000044878.3	5,11	1597,1669	578,1235	622,382	258,258	0,1669	-1,1
ENSMUSG00000099839.1	chr1	87142874	87146983	-	1340	5	5	8	0	8	10	4	2	3	Gm29374	ENSMUSG00000099839.1	1	ENSMUST00000187198.1	3	1337	2772	777	2612	0	5
ENSMUSG00000026247.13	chr1	87147655	87156521	-	3500	560	549	222	161	253	417	248	270	445	Ecel1	ENSMUSG00000026247.13	5	ENSMUST00000161002.7,ENSMUST00000027463.10,ENSMUST00000160810.1,ENSMUST00000162015.1,ENSMUST00000159662.1	18,17,18,3,2	3015,2678,2880,571,189	5851,4691,5623,463,99	884,823,884,291,124	1160,626,932,323,99	0,0,0,0,0	18,17,18,5,4
ENSMUSG00000036480.9	chr1	87183313	87188405	+	2180	33	37	57	39	22	36	107	51	150	Prss56	ENSMUSG00000036480.9	1	ENSMUST00000044533.8	13	2167	2925	460	557	1802	1
ENSMUSG00000026251.13	chr1	87190607	87200070	+	3288	0	0	0	2	0	0	3	0	0	Chrnd	ENSMUSG00000026251.13	3	ENSMUST00000189970.1,ENSMUST00000073252.8,ENSMUST00000186373.1	3,12,11	535,2913,2938	624,6520,6287	246,1490,1489	391,1845,1845	0,1551,1227	-1,1,3
ENSMUSG00000026253.14	chr1	87204657	87212694	+	4163	0	0	0	3	2	4	0	0	0	Chrng	ENSMUSG00000026253.14	5	ENSMUST00000185763.6,ENSMUST00000188796.6,ENSMUST00000027470.13,ENSMUST00000186038.1,ENSMUST00000189392.1	6,5,12,5,4	771,448,2768,724,1501	2868,2037,4115,1686,1020	328,139,1379,329,1208	1371,1449,710,666,628	0,0,1548,0,0	1,1,1,1,-1
ENSMUSG00000026254.17	chr1	87213914	87240488	+	7497	20532	25811	22264	21930	20319	21936	19563	19907	21376	Eif4e2	ENSMUSG00000026254.17	8	ENSMUST00000113232.7,ENSMUST00000113233.7,ENSMUST00000050876.13,ENSMUST00000076362.11,ENSMUST00000113235.7,ENSMUST00000113230.7,ENSMUST00000123735.7,ENSMUST00000113231.3	6,7,7,7,8,6,6,7	1119,1800,2862,3387,3465,1563,564,1112	11574,13142,17935,23187,23109,11098,11330,12666	510,1055,2117,2642,2642,556,149,263	5562,5562,6361,11613,6170,5086,5086,5086	696,731,773,698,704,681,0,716	1,1,1,1,1,1,2,1
ENSMUSG00000088318.1	chr1	87251148	87251248	+	101	0	0	0	0	0	0	0	0	0	Gm26187	ENSMUSG00000088318.1	1	ENSMUST00000157693.1	1	100	0	100	0	0	-1
ENSMUSG00000026255.15	chr1	87264363	87310839	+	2125	91	129	140	105	130	173	261	234	346	Efhd1	ENSMUSG00000026255.15	3	ENSMUST00000118687.7,ENSMUST00000027472.6,ENSMUST00000150831.1	5,4,2	1721,1850,351	44752,44626,165	864,1178,270	24714,24714,165	719,719,0	1,1,-1
ENSMUSG00000089821.1	chr1	87264481	87265174	-	332	1	0	0	3	0	0	2	1	1	Efhd1os	ENSMUSG00000089821.1	1	ENSMUST00000138844.2	2	330	363	253	363	0	4
ENSMUSG00000048000.15	chr1	87326998	87450796	+	14216	14650	18903	16813	18370	15587	17447	14184	15967	17418	Gigyf2	ENSMUSG00000048000.15	23	ENSMUST00000174846.7,ENSMUST00000027475.14,ENSMUST00000172794.7,ENSMUST00000174583.7,ENSMUST00000164992.8,ENSMUST00000187038.1,ENSMUST00000173850.7,ENSMUST00000173173.7,ENSMUST00000172964.7,ENSMUST00000174501.7,ENSMUST00000174605.1,ENSMUST00000172976.1,ENSMUST00000174535.1,ENSMUST00000174334.7,ENSMUST00000173235.7,ENSMUST00000172736.7,ENSMUST00000173152.1,ENSMUST00000173148.1,ENSMUST00000173663.1…	4,29,29,4,18,1,9,22,26,27,4,2,4,3,18,4,4,5,3,6,2,9,3	991,5695,4000,3011,2312,1961,2511,2743,3695,3849,670,543,582,530,2808,662,614,561,383,767,556,3065,775	27733,118098,118116,27743,95842,0,61324,103990,91004,90850,14530,951,20413,20175,35545,3313,2081,5193,2019,12196,1099,14611,5105	751,1718,236,2803,199,1961,1832,199,236,236,431,471,217,292,252,217,217,188,199,196,375,1718,498	20070,23659,23659,20070,29556,0,20070,23659,23659,23659,8718,951,17183,17037,4952,3138,1909,2939,1927,7221,1099,3497,2619	0,3849,3831,0,0,0,0,0,3345,3849,0,0,0,0,2347,0,0,126,0,0,0,0,0	-1,3,3,-1,3,-1,-1,3,1,1,-1,-1,-1,1,-1,-1,1,1,1,-1,-1,-1,-1
ENSMUSG00000095281.1	chr1	87341455	87341561	-	107	0	0	0	0	0	0	0	0	0	Gm22549	ENSMUSG00000095281.1	1	ENSMUST00000178461.1	1	106	0	106	0	0	3
ENSMUSG00000079436.3	chr1	87386363	87394729	-	1270	227	269	391	210	355	314	191	278	289	Kcnj13	ENSMUSG00000079436.3	2	ENSMUST00000113212.3,ENSMUST00000174179.1	3,2	1267,259	7099,2128	675,223	5207,2128	0,0	3,2
ENSMUSG00000089613.1	chr1	87415255	87415349	-	95	0	0	0	0	0	0	0	0	0	Gm23504	ENSMUSG00000089613.1	1	ENSMUST00000158988.1	1	94	0	94	0	0	3
ENSMUSG00000026258.5	chr1	87470271	87475482	+	722	6	0	3	0	0	0	0	0	0	3110079O15Rik	ENSMUSG00000026258.5	2	ENSMUST00000027476.5,ENSMUST00000191095.1	3,3	475,554	4736,2365	182,243	4612,2241	363,0	1,-1
ENSMUSG00000026259.14	chr1	87476834	87573870	-	3905	148	223	183	270	196	207	227	235	388	Ngef	ENSMUSG00000026259.14	4	ENSMUST00000027477.14,ENSMUST00000068681.11,ENSMUST00000168235.1,ENSMUST00000166463.1	13,15,7,6	2733,3094,1103,729	30795,93942,6389,5759	910,910,522,187	13522,31272,1887,1887	0,0,376,0	13,15,7,8
ENSMUSG00000079434.8	chr1	87509889	87597845	+	2590	0	0	0	0	1	0	6	0	1	Neu2	ENSMUSG00000079434.8	7	ENSMUST00000166055.7,ENSMUST00000166259.7,ENSMUST00000172222.7,ENSMUST00000163606.7,ENSMUST00000164128.1,ENSMUST00000165109.1,ENSMUST00000070898.5	3,3,4,4,3,2,3	669,1593,1711,419,1730,1822,1567	86112,22201,22100,22100,12078,1449,1710	326,1283,1300,211,1307,1283,1289	84663,20752,15343,15343,10629,1449,1449	0,1138,1179,0,1155,1138,1138	2,2,2,2,1,1,2
ENSMUSG00000091123.1	chr1	87514175	87514297	+	123	0	2	0	1	1	1	0	0	0	Gm17181	ENSMUSG00000091123.1	1	ENSMUST00000168856.1	1	122	0	122	0	0	-1
ENSMUSG00000090994.1	chr1	87543635	87544692	-	1058	10	2	11	4	3	11	4	8	4	Gm6153	ENSMUSG00000090994.1	1	ENSMUST00000172004.1	1	1057	0	1057	0	0	3
ENSMUSG00000026288.14	chr1	87620312	87720507	+	7602	316	467	410	443	424	477	510	519	592	Inpp5d	ENSMUSG00000026288.14	11	ENSMUST00000169754.7,ENSMUST00000163222.1,ENSMUST00000042275.14,ENSMUST00000164592.7,ENSMUST00000072999.12,ENSMUST00000168783.7,ENSMUST00000165554.1,ENSMUST00000163576.1,ENSMUST00000170300.7,ENSMUST00000167032.1,ENSMUST00000163548.1	27,2,27,3,28,28,4,4,23,22,3	4910,362,4853,2477,4649,3826,366,340,3919,4103,574	95285,14661,95288,22288,95456,95469,46999,45902,40344,40160,2244	1186,275,1182,2172,1182,594,150,150,1181,1181,359	30032,14661,30032,14661,30032,30032,30032,30032,7759,7759,1365	3549,0,3546,0,2853,3365,0,0,2582,2766,0	1,-1,1,-1,1,1,-1,3,2,2,-1
ENSMUSG00000026289.15	chr1	87755870	87792428	+	9628	7301	7904	7032	8030	7280	7646	6271	6940	7599	Atg16l1	ENSMUSG00000026289.15	11	ENSMUST00000144047.7,ENSMUST00000027512.12,ENSMUST00000133072.7,ENSMUST00000137638.7,ENSMUST00000113186.7,ENSMUST00000113190.2,ENSMUST00000151037.7,ENSMUST00000134603.1,ENSMUST00000129431.1,ENSMUST00000139628.1,ENSMUST00000127884.1	6,18,4,12,17,19,18,5,4,2,4	743,3112,3747,1582,2987,3083,3326,1669,636,330,3396	14785,33303,9597,28541,33359,33256,33011,10221,7605,3063,6708	251,1212,3291,323,1206,1209,1209,1177,329,294,2686	5194,5194,5194,5194,5194,5194,5194,5194,4335,3063,4134	0,1806,0,0,1750,1853,0,0,0,0,0	2,1,-1,-1,1,1,-1,-1,-1,-1,-1
ENSMUSG00000087968.1	chr1	87776938	87777209	+	272	1113	1251	961	1343	1269	1052	1010	984	1135	Gm25395	ENSMUSG00000087968.1	1	ENSMUST00000157343.1	1	271	0	271	0	0	-1
ENSMUSG00000089281.1	chr1	87784556	87784820	+	265	3481	3693	2926	3846	3807	3392	4048	3875	4103	Scarna6	ENSMUSG00000089281.1	1	ENSMUST00000158656.1	1	264	0	264	0	0	-1
ENSMUSG00000056055.13	chr1	87803680	87845158	+	8904	32	291	126	45	231	125	38	244	47	Sag	ENSMUSG00000056055.13	9	ENSMUST00000156381.7,ENSMUST00000130886.7,ENSMUST00000155393.7,ENSMUST00000128761.7,ENSMUST00000177757.1,ENSMUST00000077772.11,ENSMUST00000144334.7,ENSMUST00000136708.1,ENSMUST00000145385.1	6,9,12,11,16,16,7,3,3	1080,1877,1656,4716,1568,1703,767,854,2980	13103,19743,29574,27000,39775,39775,11528,2908,5946	347,874,360,3557,332,332,227,676,1981	4930,4930,4930,4930,4930,4930,3732,1934,3372	0,0,0,0,1197,1197,0,0,0	-1,-1,-1,-1,2,2,-1,-1,-1
ENSMUSG00000070738.10	chr1	87853287	87945180	+	6850	14233	16709	15431	14746	14500	16826	13707	15229	17161	Dgkd	ENSMUSG00000070738.10	7	ENSMUST00000027517.13,ENSMUST00000190243.1,ENSMUST00000191589.1,ENSMUST00000185260.6,ENSMUST00000190061.6,ENSMUST00000189726.1,ENSMUST00000189448.1	30,4,3,6,9,7,5	5665,479,656,647,3750,863,711	85538,34830,3417,5624,7033,4119,6082	2107,252,398,151,2797,168,263	33161,33161,2852,2064,2077,1254,4186	3633,0,0,0,1086,0,589	1,-1,-1,-1,-1,-1,-1
ENSMUSG00000101942.1	chr1	87853347	87854299	-	841	10	0	1	3	6	17	5	7	5	Gm19582	ENSMUSG00000101942.1	1	ENSMUST00000187511.1	2	839	113	511	113	0	4
ENSMUSG00000103996.1	chr1	87865073	87865916	+	844	7	3	3	12	18	0	3	5	8	4833421G17Rik	ENSMUSG00000103996.1	1	ENSMUST00000191704.1	1	843	0	843	0	0	-1
ENSMUSG00000103591.1	chr1	87897540	87900532	+	2993	7	9	17	19	13	36	5	12	14	Gm38365	ENSMUSG00000103591.1	1	ENSMUST00000195720.1	1	2992	0	2992	0	0	-1
ENSMUSG00000005501.14	chr1	87945119	88008551	-	11871	7140	8935	7448	7266	7431	8568	7790	9465	10143	Usp40	ENSMUSG00000005501.14	9	ENSMUST00000189409.6,ENSMUST00000040783.10,ENSMUST00000187758.6,ENSMUST00000188332.6,ENSMUST00000186670.1,ENSMUST00000190446.1,ENSMUST00000186315.1,ENSMUST00000187871.1,ENSMUST00000189586.1	13,28,32,33,3,1,11,1,2	4620,5021,3945,4076,568,2178,1714,2334,1659	26159,58409,58146,58015,1406,0,21059,0,996	3477,1586,322,322,328,2178,444,2334,1547	8210,11589,5628,5628,1274,0,4017,0,996	4497,0,0,0,0,0,0,0,0	2,28,32,3,5,3,13,3,4
ENSMUSG00000095942.1	chr1	88015924	88016033	+	110	0	0	0	0	0	0	0	0	0	Gm25198	ENSMUSG00000095942.1	1	ENSMUST00000178574.1	1	109	0	109	0	0	-1
ENSMUSG00000084021.1	chr1	88022381	88023962	+	1582	7	15	4	9	9	10	2	4	9	Gm5832	ENSMUSG00000084021.1	1	ENSMUST00000121704.1	1	1581	0	1581	0	0	-1
ENSMUSG00000083478.1	chr1	88025211	88026059	+	849	0	0	0	0	0	0	0	0	0	Gm15375	ENSMUSG00000083478.1	1	ENSMUST00000119510.1	1	848	0	848	0	0	-1
ENSMUSG00000090165.8	chr1	88055388	88219004	+	2267	311	379	369	317	335	422	245	276	402	Ugt1a10	ENSMUSG00000090165.8	3	ENSMUST00000138182.7,ENSMUST00000113142.9,ENSMUST00000173325.1	4,5,5	713,2239,626	160256,161354,160182	276,925,183	159380,158708,158708	0,1588,0	1,1,1
ENSMUSG00000092220.1	chr1	88055393	88218584	-	1062	0	0	0	0	0	0	0	0	0	Gm20528	ENSMUSG00000092220.1	2	ENSMUST00000173165.1,ENSMUST00000174821.1	2,2	532,800	162659,5785	393,527	162659,5785	0,0	4,4
ENSMUSG00000090175.1	chr1	88070800	88218997	+	2190	311	379	369	317	335	422	245	276	402	Ugt1a9	ENSMUSG00000090175.1	1	ENSMUST00000073772.4	5	2185	146012	878	143366	1582	1
ENSMUSG00000089675.1	chr1	88087813	88219004	+	2227	311	379	369	317	335	422	245	276	402	Ugt1a8	ENSMUSG00000089675.1	1	ENSMUST00000113139.1	5	2222	128969	908	126323	1588	1
ENSMUSG00000090124.7	chr1	88095062	88220002	+	4219	517	580	567	472	509	688	369	471	607	Ugt1a7c	ENSMUSG00000090124.7	4	ENSMUST00000150634.7,ENSMUST00000058237.13,ENSMUST00000126203.7,ENSMUST00000113135.5	4,5,4,6	678,3226,839,3296	120617,121712,122474,113454	241,1875,300,1875	119741,119066,119741,75713	0,1591,396,1591	1,1,1,2
ENSMUSG00000082837.1	chr1	88097918	88098131	+	214	0	0	4	0	0	0	0	0	0	Gm15373	ENSMUSG00000082837.1	1	ENSMUST00000121495.1	1	213	0	213	0	0	-1
ENSMUSG00000090145.7	chr1	88103252	88219003	+	2382	326	396	390	340	360	448	255	295	439	Ugt1a6b	ENSMUSG00000090145.7	2	ENSMUST00000113138.7,ENSMUST00000113137.1	6,5	2297,2244	113454,109891	876,937	107245,107245	1591,1591	2,1
ENSMUSG00000084195.1	chr1	88126776	88127609	+	834	4	0	0	0	0	3	0	0	0	Gm15372	ENSMUSG00000084195.1	1	ENSMUST00000120729.1	1	833	0	833	0	0	-1
ENSMUSG00000081261.1	chr1	88129581	88129833	+	253	0	0	0	0	0	0	0	0	0	Gm15370	ENSMUSG00000081261.1	1	ENSMUST00000117158.1	1	252	0	252	0	0	-1
ENSMUSG00000054545.17	chr1	88134809	88218997	+	4312	423	477	488	436	439	593	305	377	513	Ugt1a6a	ENSMUSG00000054545.17	4	ENSMUST00000113134.7,ENSMUST00000124852.1,ENSMUST00000140092.7,ENSMUST00000014263.5	6,3,5,5	2291,3339,603,2260	81897,79251,80872,78359	870,2359,219,953	75713,75713,75713,75713	1591,0,0,1591	2,-1,2,1
ENSMUSG00000081602.1	chr1	88146376	88146769	+	394	0	1	0	0	0	0	0	0	1	Gm15369	ENSMUSG00000081602.1	1	ENSMUST00000119681.1	1	393	0	393	0	0	-1
ENSMUSG00000082513.1	chr1	88151038	88151881	+	844	0	0	0	1	0	0	0	0	0	Gm15374	ENSMUSG00000082513.1	1	ENSMUST00000119313.1	1	843	0	843	0	0	-1
ENSMUSG00000082677.1	chr1	88153788	88154571	+	784	0	0	0	0	0	0	0	0	0	Gm15371	ENSMUSG00000082677.1	1	ENSMUST00000117057.1	1	783	0	783	0	0	-1
ENSMUSG00000089943.1	chr1	88166012	88218997	+	2203	311	379	369	317	335	422	245	278	402	Ugt1a5	ENSMUSG00000089943.1	1	ENSMUST00000097659.4	5	2198	50787	891	48141	1585	1
ENSMUSG00000081488.1	chr1	88186662	88187519	+	858	1	0	0	1	1	0	0	0	0	Gm15368	ENSMUSG00000081488.1	1	ENSMUST00000120438.1	1	857	0	857	0	0	-1
ENSMUSG00000083277.1	chr1	88191901	88192683	+	783	0	0	0	0	0	0	0	1	0	Gm15376	ENSMUSG00000083277.1	1	ENSMUST00000122258.1	1	782	0	782	0	0	-1
ENSMUSG00000090171.1	chr1	88200601	88218997	+	2211	311	379	369	317	335	422	245	276	402	Ugt1a2	ENSMUSG00000090171.1	1	ENSMUST00000049289.8	5	2206	16190	899	13544	1597	1
ENSMUSG00000081984.3	chr1	88204732	88205782	-	1051	601	979	718	673	817	729	650	790	908	Dnajb3	ENSMUSG00000081984.3	1	ENSMUST00000119972.3	1	1050	0	1050	0	-724	1
ENSMUSG00000089960.1	chr1	88211959	88218997	+	2224	311	379	369	317	335	423	245	276	402	Ugt1a1	ENSMUSG00000089960.1	1	ENSMUST00000073049.6	5	2219	4819	912	2173	1603	1
ENSMUSG00000079429.9	chr1	88226986	88262289	+	8492	4	0	0	1	6	6	0	0	7	Mroh2a	ENSMUSG00000079429.9	5	ENSMUST00000148474.1,ENSMUST00000061013.12,ENSMUST00000113130.7,ENSMUST00000142632.1,ENSMUST00000135948.1	4,43,42,3,5	650,7483,7449,1231,663	5825,27786,27809,1598,1748	242,2384,2384,933,264	4909,2368,2368,1078,718	0,4998,4975,0,520	-1,2,2,-1,-1
ENSMUSG00000044783.16	chr1	88262471	88277633	-	8331	28072	26602	22660	23574	22931	31465	23884	21184	21696	Hjurp	ENSMUSG00000044783.16	7	ENSMUST00000054674.14,ENSMUST00000065420.11,ENSMUST00000147393.1,ENSMUST00000127446.1,ENSMUST00000128532.1,ENSMUST00000148384.1,ENSMUST00000126739.1	8,5,5,2,3,2,2	4870,2212,2025,380,563,780,2778	10292,10517,10503,2663,3219,789,89	4187,1830,1680,309,390,745,2573	2430,7016,7002,2663,2430,789,89	0,0,0,153,0,0,0	8,5,4,2,5,4,4
ENSMUSG00000036251.16	chr1	88277661	88389293	+	4732	10	12	18	12	9	27	15	4	3	Trpm8	ENSMUSG00000036251.16	4	ENSMUST00000148138.7,ENSMUST00000113114.9,ENSMUST00000040210.13,ENSMUST00000171176.2	6,29,26,25	561,4083,4120,3698	29851,81485,78414,66240	129,310,752,310	25561,11063,12174,9032	0,3291,3291,3291	-1,5,2,1
ENSMUSG00000085420.1	chr1	88347489	88352930	-	1236	0	0	0	0	0	0	0	0	0	4930453O03Rik	ENSMUSG00000085420.1	1	ENSMUST00000147594.1	5	1231	4210	796	2161	0	7
ENSMUSG00000026295.12	chr1	88406961	88426438	+	992	0	0	0	4	0	1	9	16	15	Spp2	ENSMUSG00000026295.12	3	ENSMUST00000027518.11,ENSMUST00000176708.7,ENSMUST00000189225.1	8,7,5	920,703,439	18557,18456,18587	255,162,121	5644,5644,6010	605,266,233	1,3,-1
ENSMUSG00000099553.1	chr1	88443969	88462608	-	471	1	11	23	3	1	4	3	6	4	Gm29538	ENSMUSG00000099553.1	1	ENSMUST00000190783.1	3	468	18171	267	16133	0	5
ENSMUSG00000100908.1	chr1	88459683	88465558	+	316	0	0	0	0	0	0	0	0	0	Gm28888	ENSMUSG00000100908.1	1	ENSMUST00000186556.1	2	314	5561	272	5561	0	-1
ENSMUSG00000062310.7	chr1	88499871	88510066	-	1957	0	0	0	6	0	1	0	0	0	Glrp1	ENSMUSG00000062310.7	1	ENSMUST00000067625.8	3	1954	8241	1271	6241	0	3
ENSMUSG00000100798.1	chr1	88551517	88562167	+	2623	0	0	0	0	0	0	0	0	0	Gm19589	ENSMUSG00000100798.1	1	ENSMUST00000189394.1	6	2617	8033	1591	3390	0	-1
ENSMUSG00000104057.1	chr1	88653085	88654845	+	1761	0	0	0	0	0	0	0	0	0	Gm38130	ENSMUSG00000104057.1	1	ENSMUST00000194311.1	1	1760	0	1760	0	0	-1
ENSMUSG00000100367.1	chr1	88656308	88658100	+	573	0	0	0	0	0	0	3	0	0	Gm29336	ENSMUSG00000100367.1	1	ENSMUST00000186042.1	2	571	1221	432	1221	0	-1
ENSMUSG00000049866.12	chr1	88673125	88702221	-	5492	11118	11710	10252	10545	10180	10091	12662	13238	16496	Arl4c	ENSMUSG00000049866.12	3	ENSMUST00000051236.10,ENSMUST00000187810.1,ENSMUST00000159814.1	3,3,1	2739,2737,3996	26012,26012,0	1343,1341,3996	25914,25914,0	-574,-574,-574	1,1,1
ENSMUSG00000101736.1	chr1	88722366	88722824	-	459	0	0	0	0	0	0	0	0	0	Gm29335	ENSMUSG00000101736.1	1	ENSMUST00000188361.1	1	458	0	458	0	0	3
ENSMUSG00000097398.2	chr1	88754890	88755736	+	572	0	0	11	0	3	0	7	6	11	Platr5	ENSMUSG00000097398.2	2	ENSMUST00000181016.2,ENSMUST00000180596.1	3,3	476,355	370,400	206,175	244,244	0,0	-1,-1
ENSMUSG00000099848.1	chr1	88868475	88875410	-	284	0	0	0	0	0	0	0	0	0	Gm29337	ENSMUSG00000099848.1	1	ENSMUST00000185425.1	2	282	6653	149	6653	0	4
ENSMUSG00000101333.1	chr1	88932319	88933573	+	1255	0	0	0	0	0	0	0	0	0	Gm4753	ENSMUSG00000101333.1	1	ENSMUST00000188327.1	1	1254	0	1254	0	0	-1
ENSMUSG00000099378.1	chr1	89016113	89022210	+	603	0	0	0	0	0	0	0	0	0	1700067G17Rik	ENSMUSG00000099378.1	1	ENSMUST00000186180.1	3	600	5497	259	5323	0	-1
ENSMUSG00000099544.1	chr1	89048974	89049216	+	243	0	0	0	2	0	0	1	1	1	Gm18699	ENSMUSG00000099544.1	1	ENSMUST00000190713.1	1	242	0	242	0	0	-1
ENSMUSG00000036206.12	chr1	89070415	89155068	+	5112	1482	2102	1968	1534	1683	2053	2750	2946	3211	Sh3bp4	ENSMUSG00000036206.12	2	ENSMUST00000066279.10,ENSMUST00000123745.1	6,3	4989,338	79664,42069	2356,144	36661,36661	2885,0	3,-1
ENSMUSG00000102700.1	chr1	89097073	89098818	+	1746	31	19	13	32	34	22	95	217	174	Gm38312	ENSMUSG00000102700.1	1	ENSMUST00000195426.1	1	1745	0	1745	0	0	-1
ENSMUSG00000102083.1	chr1	89256182	89256981	-	800	0	0	1	0	0	0	3	2	1	Gm5259	ENSMUSG00000102083.1	1	ENSMUST00000191231.1	1	799	0	799	0	0	3
ENSMUSG00000101288.1	chr1	89302719	89358144	-	589	1	4	0	0	0	3	0	1	0	Gm28342	ENSMUSG00000101288.1	1	ENSMUST00000190308.1	3	586	54839	454	54159	0	5
ENSMUSG00000099938.1	chr1	89360342	89406133	-	591	0	0	0	0	0	0	0	0	0	C030007H22Rik	ENSMUSG00000099938.1	1	ENSMUST00000186258.1	3	588	45203	374	44045	0	5
ENSMUSG00000055013.15	chr1	89454806	89897617	+	17559	4474	5703	4863	4917	4640	5373	3555	3649	4536	Agap1	ENSMUSG00000055013.15	6	ENSMUST00000027521.14,ENSMUST00000190096.6,ENSMUST00000185417.1,ENSMUST00000074945.6,ENSMUST00000212721.1,ENSMUST00000212924.1	18,17,1,17,3,3	11903,4061,4450,10052,183,392	430908,431066,0,304989,18167,45033	8926,1310,4450,6586,87,161	149006,149006,0,54690,17466,34533	2556,2398,0,2000,0,0	1,1,-1,5,-1,-1
ENSMUSG00000104114.1	chr1	89483438	89485821	+	2384	40	44	57	74	66	72	68	84	85	Gm37297	ENSMUSG00000104114.1	1	ENSMUST00000192974.1	1	2383	0	2383	0	0	-1
ENSMUSG00000088371.1	chr1	89563360	89563474	+	115	7	1	0	0	1	3	0	0	7	Gm25180	ENSMUSG00000088371.1	1	ENSMUST00000157746.1	1	114	0	114	0	0	-1
ENSMUSG00000101662.1	chr1	89568765	89576602	+	666	16	12	7	43	16	15	22	14	19	Gm28499	ENSMUSG00000101662.1	1	ENSMUST00000191576.1	3	663	7174	422	5545	0	-1
ENSMUSG00000102009.6	chr1	89650529	89683908	-	3393	0	0	0	0	0	0	0	0	0	4933400F21Rik	ENSMUSG00000102009.6	3	ENSMUST00000186098.6,ENSMUST00000187295.1,ENSMUST00000187011.1	5,4,2	1002,2629,381	32377,3778,2422	397,2181,201	26037,2422,2422	0,0,0	7,6,4
ENSMUSG00000088775.1	chr1	89684802	89685112	+	311	7	5	2	26	6	9	10	24	29	Gm26037	ENSMUSG00000088775.1	1	ENSMUST00000158150.1	1	310	0	310	0	0	-1
ENSMUSG00000103252.1	chr1	89825481	89827525	+	2045	15	16	11	21	28	31	5	17	10	Gm37521	ENSMUSG00000103252.1	1	ENSMUST00000193177.1	1	2044	0	2044	0	0	-1
ENSMUSG00000034486.8	chr1	89927956	89931179	-	2177	228	4	10	6	10	25	301	435	239	Gbx2	ENSMUSG00000034486.8	2	ENSMUST00000036954.8,ENSMUST00000187633.1	2,1	2133,1219	1090,0	1187,1219	1090,0	0,0	2,3
ENSMUSG00000092627.2	chr1	89930234	89933290	+	3057	17	7	6	0	0	4	20	26	12	D130058E05Rik	ENSMUSG00000092627.2	2	ENSMUST00000173856.1,ENSMUST00000189763.1	2,1	1370,3029	258,0	1151,3029	258,0	0,0	-1,-1
ENSMUSG00000067081.12	chr1	89950220	90014666	-	3952	17	9	14	16	2	10	7	13	33	Asb18	ENSMUSG00000067081.12	4	ENSMUST00000086882.7,ENSMUST00000097656.9,ENSMUST00000154228.7,ENSMUST00000151330.1	6,6,4,5	3856,782,769,605	60501,61293,61130,61293	2643,293,267,204	24238,22318,38456,24908	0,0,0,0	6,6,3,3
ENSMUSG00000026301.16	chr1	90042132	90153401	-	4278	59	71	98	59	53	79	62	100	69	Iqca	ENSMUSG00000026301.16	8	ENSMUST00000113094.8,ENSMUST00000189690.6,ENSMUST00000212859.1,ENSMUST00000212394.1,ENSMUST00000189011.1,ENSMUST00000186403.1,ENSMUST00000211999.1,ENSMUST00000186522.1	19,12,5,19,2,3,6,7	3191,2048,1201,2555,372,383,743,1474	108078,45961,11619,107994,7095,7494,46207,24783	610,607,602,324,199,211,205,331	26146,14251,4422,26146,7095,7112,26146,8020	0,0,0,0,146,0,0,0	19,14,7,19,2,5,8,9
ENSMUSG00000100850.1	chr1	90153628	90159462	+	1020	9	5	2	3	0	0	6	1	7	4930434B07Rik	ENSMUSG00000100850.1	1	ENSMUST00000190254.1	2	1018	4816	629	4816	0	-1
ENSMUSG00000044337.5	chr1	90203980	90216751	+	3348	2239	2161	1673	1907	2056	1934	1242	1648	1445	Ackr3	ENSMUSG00000044337.5	2	ENSMUST00000065587.4,ENSMUST00000159654.1	2,3	3063,401	9708,9426	2956,282	9708,5501	1088,0	2,3
ENSMUSG00000104087.1	chr1	90227160	90228526	-	1367	0	0	0	0	0	0	0	0	0	Gm38277	ENSMUSG00000104087.1	1	ENSMUST00000195172.1	1	1366	0	1366	0	0	3
ENSMUSG00000101951.1	chr1	90255276	90260120	-	918	0	0	0	0	0	0	0	0	0	Gm28721	ENSMUSG00000101951.1	1	ENSMUST00000187649.1	2	916	3928	791	3928	0	4
ENSMUSG00000101028.1	chr1	90280458	90283912	+	1001	6	3	14	7	6	2	20	6	12	Gm28723	ENSMUSG00000101028.1	1	ENSMUST00000188640.1	2	999	2455	851	2455	0	-1
ENSMUSG00000098368.1	chr1	90327312	90327418	+	107	0	0	5	3	0	6	0	0	11	Gm27648	ENSMUSG00000098368.1	1	ENSMUST00000184315.1	1	106	0	106	0	0	-1
ENSMUSG00000101997.1	chr1	90453394	90454501	-	1036	2	2	0	5	0	0	0	6	6	Gm28722	ENSMUSG00000101997.1	1	ENSMUST00000187630.1	2	1034	73	870	73	0	4
ENSMUSG00000103292.1	chr1	90520496	90523297	+	2802	0	0	0	0	4	0	8	0	0	Gm35048	ENSMUSG00000103292.1	1	ENSMUST00000192105.1	1	2801	0	2801	0	0	-1
ENSMUSG00000034432.11	chr1	90602981	90613341	+	4448	11254	12526	10632	11945	11691	13853	10505	11750	12326	Cops8	ENSMUSG00000034432.11	9	ENSMUST00000036153.11,ENSMUST00000191510.6,ENSMUST00000189309.6,ENSMUST00000190057.6,ENSMUST00000186152.6,ENSMUST00000186750.1,ENSMUST00000190700.1,ENSMUST00000189107.1,ENSMUST00000186882.1	8,7,6,3,5,7,2,2,3	2279,2586,997,392,415,501,899,460,510	8081,7062,6991,1767,7123,8151,775,587,532	1167,1137,491,194,128,132,546,241,448	3424,3424,3424,1019,4581,3424,775,587,425	622,0,0,0,0,0,0,0,14	1,-1,-1,-1,-1,3,-1,-1,-1
ENSMUSG00000056128.3	chr1	90675161	90679793	+	1207	0	2	0	0	0	0	0	0	0	Gm9991	ENSMUSG00000056128.3	1	ENSMUST00000070048.3	2	1205	3427	900	3427	0	-1
ENSMUSG00000048126.16	chr1	90765923	90843971	-	11963	3610	6752	5944	4595	4896	7358	4074	6136	6374	Col6a3	ENSMUSG00000048126.16	8	ENSMUST00000188587.6,ENSMUST00000056925.15,ENSMUST00000097653.10,ENSMUST00000150769.1,ENSMUST00000136916.7,ENSMUST00000145750.1,ENSMUST00000130846.8,ENSMUST00000187753.1	41,44,41,3,15,3,11,3	8244,10062,8960,643,3260,612,5310,473	69804,67986,68132,5183,13255,217,36145,21227	754,754,754,263,614,397,617,225	13608,13488,13608,4464,3218,113,13488,13488	0,0,0,0,0,0,0,0	43,46,41,5,17,5,13,5
ENSMUSG00000103061.1	chr1	90837275	90839133	-	1859	4	8	6	11	0	4	3	4	2	Gm36970	ENSMUSG00000103061.1	1	ENSMUST00000193688.1	1	1858	0	1858	0	0	3
ENSMUSG00000103978.1	chr1	90870583	90871419	-	837	0	0	0	0	0	0	0	0	0	4930474B08Rik	ENSMUSG00000103978.1	1	ENSMUST00000194161.1	1	836	0	836	0	0	3
ENSMUSG00000026303.6	chr1	90915085	90951142	+	5357	19	42	35	22	31	50	17	39	22	Mlph	ENSMUSG00000026303.6	3	ENSMUST00000027528.6,ENSMUST00000125149.1,ENSMUST00000136220.1	16,2,2	4483,634,861	31574,119,209	2559,525,519	6592,119,209	1758,0,0	2,1,-1
ENSMUSG00000090550.2	chr1	90953108	90954027	+	276	0	0	0	0	0	0	0	0	0	Prlh	ENSMUSG00000090550.2	1	ENSMUST00000166281.2	2	274	645	178	645	259	1
ENSMUSG00000026304.13	chr1	90958133	90969661	-	1992	7	0	10	10	1	2	4	1	1	Rab17	ENSMUSG00000026304.13	5	ENSMUST00000027529.11,ENSMUST00000131428.7,ENSMUST00000128226.7,ENSMUST00000135819.1,ENSMUST00000130042.1	6,6,5,5,5	1825,1551,955,623,606	9703,7981,9862,8140,9037	866,864,318,151,159	4927,3205,7968,6246,4927	0,0,0,0,0	6,6,7,7,7
ENSMUSG00000100791.1	chr1	90974459	90975260	-	619	0	0	0	0	0	4	0	0	0	Gm28199	ENSMUSG00000100791.1	1	ENSMUST00000187127.1	2	617	184	401	184	0	4
ENSMUSG00000026305.15	chr1	90998737	91128944	+	6469	3897	4756	4413	4463	3852	4475	2703	2993	4036	Lrrfip1	ENSMUSG00000026305.15	12	ENSMUST00000189505.6,ENSMUST00000185531.6,ENSMUST00000068116.12,ENSMUST00000068167.12,ENSMUST00000097649.9,ENSMUST00000186762.6,ENSMUST00000097650.9,ENSMUST00000189617.2,ENSMUST00000188094.6,ENSMUST00000188708.1,ENSMUST00000187375.1,ENSMUST00000187532.1	13,22,13,23,8,5,23,25,4,4,3,2	1018,1725,2037,2826,3637,442,2737,2130,2638,650,212,481	108885,122037,128124,72674,60224,46632,72674,72571,3069,2969,2353,2341	170,170,854,858,2719,216,832,201,2325,256,103,389	69670,69670,69670,14840,31928,16297,14840,14840,1882,1782,2232,2341	0,0,1274,1864,2182,0,1864,1967,0,0,0,0	1,1,1,1,1,1,1,1,-1,-1,-1,-1
ENSMUSG00000070732.2	chr1	91145089	91170795	+	6518	27	34	91	31	55	61	47	74	115	Rbm44	ENSMUSG00000070732.2	4	ENSMUST00000190965.1,ENSMUST00000188818.1,ENSMUST00000094698.1,ENSMUST00000185229.1	1,2,16,3	2669,628,3835,553	0,6996,21857,1111	2669,560,1495,209	0,6996,5210,992	0,0,3028,0	-1,2,2,-1
ENSMUSG00000100018.1	chr1	91171429	91172148	-	720	7	4	6	4	1	10	7	10	3	Gm7776	ENSMUSG00000100018.1	1	ENSMUST00000191211.1	1	719	0	719	0	0	3
ENSMUSG00000034353.14	chr1	91179822	91225196	+	3022	59	58	55	52	59	39	76	44	63	Ramp1	ENSMUSG00000034353.14	3	ENSMUST00000165855.7,ENSMUST00000188475.6,ENSMUST00000097648.5	3,4,3	849,707,2322	26119,26041,42828	393,393,2090	16631,16631,26197	309,314,444	1,1,1
ENSMUSG00000034343.14	chr1	91250304	91290337	+	8842	3383	4037	3200	3310	3536	3878	3143	3482	3560	Ube2f	ENSMUSG00000034343.14	11	ENSMUST00000188576.1,ENSMUST00000059743.11,ENSMUST00000178627.7,ENSMUST00000171165.7,ENSMUST00000191368.6,ENSMUST00000171112.7,ENSMUST00000191533.1,ENSMUST00000189589.1,ENSMUST00000187494.1,ENSMUST00000185950.1,ENSMUST00000185697.1	5,11,10,10,10,11,4,3,2,5,1	634,1143,1353,5644,1100,1536,378,820,518,582,1364	24541,34286,34353,34356,34308,33825,14203,11036,1069,8698,0	229,435,720,5032,468,622,197,696,353,345,1364	9967,9967,9967,9967,9967,9967,7874,9967,1069,4410,0	0,549,549,549,549,549,0,0,0,0,0	-1,3,2,2,2,3,2,-1,-1,-1,-1
ENSMUSG00000083064.1	chr1	91296045	91296936	+	892	178	174	135	166	156	195	132	148	187	Gm7785	ENSMUSG00000083064.1	1	ENSMUST00000117121.1	1	891	0	891	0	0	-1
ENSMUSG00000097285.1	chr1	91297203	91304405	-	470	0	2	0	0	0	0	0	0	0	Gm26683	ENSMUSG00000097285.1	1	ENSMUST00000181737.1	2	468	6734	355	6734	0	4
ENSMUSG00000026307.12	chr1	91298338	91321075	+	4549	898	1074	970	923	897	1195	909	911	956	Scly	ENSMUSG00000026307.12	10	ENSMUST00000027532.12,ENSMUST00000123651.7,ENSMUST00000142488.7,ENSMUST00000154045.7,ENSMUST00000153621.7,ENSMUST00000124832.7,ENSMUST00000147523.7,ENSMUST00000142802.1,ENSMUST00000145843.2,ENSMUST00000137074.2	12,3,7,7,7,6,6,4,3,6	2190,942,756,812,2294,642,741,447,301,649	20547,4209,9619,10670,10666,9663,9667,6562,2636,6426	998,742,180,180,1533,180,180,162,112,180	5586,2129,2860,2860,2860,2839,2860,2405,2129,2860	1287,0,0,183,0,0,0,0,0,0	1,-1,1,1,-1,-1,-1,-1,2,-1
ENSMUSG00000090322.1	chr1	91305092	91321101	-	490	0	0	0	0	0	0	0	0	0	Gm17090	ENSMUSG00000090322.1	1	ENSMUST00000171768.1	3	487	15522	340	14453	0	5
ENSMUSG00000049515.12	chr1	91322075	91348306	+	5445	17	19	17	17	6	2	12	6	10	Espnl	ENSMUSG00000049515.12	2	ENSMUST00000088904.9,ENSMUST00000176156.1	9,8	5436,2878	20795,20926	3991,1622	7032,12851	3009,2878	1,1
ENSMUSG00000026308.8	chr1	91351016	91362416	+	3089	5	1	6	7	6	10	18	0	23	Klhl30	ENSMUSG00000026308.8	1	ENSMUST00000027533.8	8	3081	8319	1407	2471	1739	2
ENSMUSG00000047443.14	chr1	91366430	91374217	+	2815	14	2	3	13	8	14	23	24	11	Fam132b	ENSMUSG00000047443.14	2	ENSMUST00000086861.11,ENSMUST00000190998.1	8,4	2807,711	4980,2687	1839,559	1717,1102	1015,166	1,-1
ENSMUSG00000026309.14	chr1	91373861	91398815	-	5556	10482	12675	10084	11919	11445	12534	10392	11472	12189	Ilkap	ENSMUSG00000026309.14	13	ENSMUST00000187049.6,ENSMUST00000190747.6,ENSMUST00000027534.12,ENSMUST00000187105.6,ENSMUST00000187231.1,ENSMUST00000185886.6,ENSMUST00000187306.6,ENSMUST00000187678.6,ENSMUST00000191230.6,ENSMUST00000186986.6,ENSMUST00000186433.1,ENSMUST00000190519.1,ENSMUST00000189651.1	12,6,12,11,5,3,5,6,10,7,3,6,3	2671,620,1356,2331,775,603,372,485,1121,629,676,477,637	22168,10141,21596,20592,7839,2303,22367,22261,16655,13531,2873,12957,7923	1677,151,251,1249,440,451,142,150,194,134,459,127,429	7454,3266,7454,7454,3266,2067,14208,9238,7454,7454,1869,7454,7454	2401,79,0,0,283,0,0,0,0,0,0,0,0	5,6,12,13,5,5,4,3,12,5,5,8,5
ENSMUSG00000100253.1	chr1	91404879	91406029	-	547	0	3	0	6	3	0	0	3	1	1700020N18Rik	ENSMUSG00000100253.1	1	ENSMUST00000188956.1	3	544	606	303	314	0	5
ENSMUSG00000067071.8	chr1	91411483	91414038	-	1808	9226	12058	10034	9733	9054	10902	8970	10091	11505	Hes6	ENSMUSG00000067071.8	5	ENSMUST00000132188.7,ENSMUST00000086851.1,ENSMUST00000126136.7,ENSMUST00000155752.1,ENSMUST00000150520.1	3,4,3,3,4	1395,1331,1570,604,368	330,408,169,317,1322	999,999,1319,258,134	239,239,91,239,992	0,0,0,0,0	5,4,5,5,6
ENSMUSG00000055866.9	chr1	91415982	91459324	-	5856	333	451	413	407	426	453	304	471	427	Per2	ENSMUSG00000055866.9	2	ENSMUST00000069620.9,ENSMUST00000185298.1	23,3	5810,228	37532,1915	2038,154	8330,964	0,0	23,5
ENSMUSG00000101911.1	chr1	91469906	91470098	-	193	0	0	0	0	0	0	0	0	0	Gm28381	ENSMUSG00000101911.1	1	ENSMUST00000188403.1	1	192	0	192	0	0	3
ENSMUSG00000100151.1	chr1	91483024	91484774	+	1669	0	0	2	0	0	0	0	0	0	Gm28382	ENSMUSG00000100151.1	1	ENSMUST00000187902.1	2	1667	83	1370	83	0	-1
ENSMUSG00000101958.1	chr1	91487729	91490009	-	2162	0	0	0	1	1	0	2	0	1	Gm19085	ENSMUSG00000101958.1	1	ENSMUST00000188924.1	2	2160	120	1410	120	0	4
ENSMUSG00000034292.13	chr1	91494647	91529307	+	3712	2449	3218	3083	2922	2650	3022	2936	2697	3522	Traf3ip1	ENSMUSG00000034292.13	3	ENSMUST00000189341.6,ENSMUST00000047242.8,ENSMUST00000187588.1	16,15,8	2241,3459,2366	31068,31154,8679	419,1689,1689	6069,10726,2972	1949,1863,0	1,1,-1
ENSMUSG00000026311.16	chr1	91540544	91559589	+	6432	8007	9695	8429	8441	8934	8785	5029	5800	5864	Asb1	ENSMUSG00000026311.16	7	ENSMUST00000086843.10,ENSMUST00000185718.6,ENSMUST00000027538.8,ENSMUST00000190484.6,ENSMUST00000186068.1,ENSMUST00000188081.6,ENSMUST00000188879.1	5,4,5,4,3,4,5	2485,364,5821,731,346,1268,1294	13059,6020,13054,13361,13746,10431,12743	1337,146,4838,385,141,725,385	4824,3287,4824,7757,10454,4824,4824	1006,0,289,0,0,902,982	1,-1,4,1,1,1,1
ENSMUSG00000101705.1	chr1	91611406	91624500	+	385	0	0	0	0	1	0	0	5	0	Gm28380	ENSMUSG00000101705.1	1	ENSMUST00000188800.1	3	382	12712	178	12500	0	-1
ENSMUSG00000100980.1	chr1	91798528	91802937	-	4410	2	7	14	14	3	2	8	21	16	Gm29100	ENSMUSG00000100980.1	1	ENSMUST00000187564.1	1	4409	0	4409	0	0	3
ENSMUSG00000007805.4	chr1	91801461	91848028	+	3174	11	18	35	48	10	41	14	12	32	Twist2	ENSMUSG00000007805.4	2	ENSMUST00000007949.3,ENSMUST00000186075.1	2,1	1327,2524	45240,0	688,2524	45240,0	482,482	1,1
ENSMUSG00000101414.1	chr1	91822515	91823985	+	1471	0	5	0	8	4	0	0	0	0	Gm29101	ENSMUSG00000101414.1	1	ENSMUST00000188329.1	1	1470	0	1470	0	0	-1
ENSMUSG00000102745.1	chr1	91916260	91919551	+	3292	0	0	0	0	0	0	0	0	0	Gm37600	ENSMUSG00000102745.1	1	ENSMUST00000193764.1	1	3291	0	3291	0	0	-1
ENSMUSG00000026313.16	chr1	91928779	92195699	-	15813	4304	5405	5161	4840	4744	5251	3650	4430	4537	Hdac4	ENSMUSG00000026313.16	12	ENSMUST00000097644.8,ENSMUST00000008995.14,ENSMUST00000189303.6,ENSMUST00000191327.1,ENSMUST00000187308.1,ENSMUST00000189730.1,ENSMUST00000185267.1,ENSMUST00000186002.2,ENSMUST00000185341.6,ENSMUST00000187622.1,ENSMUST00000212867.1,ENSMUST00000212408.1	27,26,23,3,10,1,1,4,3,4,5,4	8073,3911,3264,586,928,3575,3190,845,404,406,792,646	243489,211725,70633,1075,19199,0,0,149497,82961,82875,164758,164909	4607,629,428,262,186,3575,3190,295,230,146,280,285	93284,93284,11214,805,3512,0,0,93284,58256,36760,93284,93284	0,0,0,0,0,0,0,0,0,0,0,0	27,26,25,5,12,3,3,6,5,6,7,6
ENSMUSG00000103101.1	chr1	91975987	91981564	+	5578	0	0	0	0	0	0	0	0	0	Gm37048	ENSMUSG00000103101.1	1	ENSMUST00000194827.1	1	5577	0	5577	0	0	-1
ENSMUSG00000096941.1	chr1	91989051	91992628	+	3538	0	0	0	0	0	0	0	0	0	Gm26720	ENSMUSG00000096941.1	1	ENSMUST00000181260.1	2	3536	41	1781	41	0	-1
ENSMUSG00000102565.1	chr1	92019592	92022097	-	2506	42	24	20	43	41	58	34	34	41	Gm37036	ENSMUSG00000102565.1	1	ENSMUST00000192836.1	1	2505	0	2505	0	0	3
ENSMUSG00000101265.1	chr1	92324510	92329888	+	760	0	0	0	2	0	0	0	0	0	Gm29099	ENSMUSG00000101265.1	1	ENSMUST00000187370.1	2	758	4620	396	4620	0	-1
ENSMUSG00000101522.1	chr1	92430121	92430532	-	412	0	0	0	1	0	6	0	0	7	Gm7837	ENSMUSG00000101522.1	1	ENSMUST00000190873.1	1	411	0	411	0	0	3
ENSMUSG00000026260.12	chr1	92439010	92473860	-	3331	12264	14886	12038	14083	12572	12943	11654	12689	14347	Ndufa10	ENSMUSG00000026260.12	8	ENSMUST00000027478.6,ENSMUST00000189503.6,ENSMUST00000153897.1,ENSMUST00000187098.1,ENSMUST00000187141.6,ENSMUST00000185466.1,ENSMUST00000185251.1,ENSMUST00000189582.1	10,10,3,4,6,5,3,1	2010,1504,510,244,669,710,351,988	32840,32974,20365,10692,7971,7238,5981,0	897,628,337,85,215,234,215,988	12104,12104,12104,8261,2899,2899,3585,0	0,0,0,0,0,0,0,0	10,3,5,6,8,7,5,3
ENSMUSG00000098288.1	chr1	92464483	92464542	-	60	2	8	5	2	2	0	2	1	0	Mir6900	ENSMUSG00000098288.1	1	ENSMUST00000183483.1	1	59	0	59	0	0	3
ENSMUSG00000067064.3	chr1	92475925	92485113	-	4838	0	0	0	0	0	0	0	0	0	Olfr1416	ENSMUSG00000067064.3	3	ENSMUST00000214928.1,ENSMUST00000086837.1,ENSMUST00000203760.1	2,1,2	4821,938,1080	4352,0,4352	4704,938,948	4352,0,4352	-934,-934,-934	2,1,2
ENSMUSG00000057464.4	chr1	92489101	92496101	-	2815	0	0	0	0	0	0	0	0	0	Olfr1415	ENSMUSG00000057464.4	3	ENSMUST00000204009.2,ENSMUST00000071521.2,ENSMUST00000204766.1	2,1,3	2813,935,400	4187,0,4304	2662,935,224	4187,0,4187	-931,-931,-211	2,1,2
ENSMUSG00000042849.11	chr1	92506366	92518661	-	6083	0	0	0	0	0	0	0	0	0	Olfr1414	ENSMUSG00000042849.11	2	ENSMUST00000062353.11,ENSMUST00000189174.1	2,2	6015,1157	6280,6214	5670,1054	6280,6214	-934,-934	2,2
ENSMUSG00000058904.3	chr1	92571322	92574397	+	1724	0	0	0	0	0	0	0	0	0	Olfr1413	ENSMUSG00000058904.3	2	ENSMUST00000214239.1,ENSMUST00000074859.2	2,1	1722,1081	1353,0	1385,1081	1353,0	971,971	2,1
ENSMUSG00000097001.1	chr1	92572374	92572749	-	376	0	0	0	0	0	0	0	0	0	1700054K02Rik	ENSMUSG00000097001.1	1	ENSMUST00000181755.1	1	375	0	375	0	0	3
ENSMUSG00000099363.1	chr1	92574614	92574796	+	183	0	0	0	0	0	0	0	0	0	Gm28478	ENSMUSG00000099363.1	1	ENSMUST00000185802.1	1	182	0	182	0	0	-1
ENSMUSG00000046300.4	chr1	92585779	92591375	+	3663	0	0	0	0	0	0	0	0	0	Olfr1412	ENSMUSG00000046300.4	2	ENSMUST00000190505.2,ENSMUST00000062964.4	2,1	3661,965	1935,0	3273,965	1935,0	965,965	2,1
ENSMUSG00000107778.1	chr1	92589872	92589917	+	46	0	0	0	0	0	0	0	0	0	Gm44098	ENSMUSG00000107778.1	1	ENSMUST00000204141.1	1	45	0	45	0	0	-1
ENSMUSG00000062497.3	chr1	92594411	92597753	+	1901	0	0	0	0	0	0	0	0	0	Olfr1411	ENSMUSG00000062497.3	3	ENSMUST00000190844.2,ENSMUST00000216444.1,ENSMUST00000073748.3	2,2,1	1819,1899,971	1523,1443,0	1376,1456,971	1523,1443,0	971,971,971	2,2,1
ENSMUSG00000108131.1	chr1	92595365	92595476	+	112	0	0	0	0	0	0	0	0	0	Gm44099	ENSMUSG00000108131.1	1	ENSMUST00000203299.1	1	111	0	111	0	0	-1
ENSMUSG00000063583.6	chr1	92605782	92614806	+	7927	0	1	0	0	0	0	0	0	0	Olfr1410	ENSMUSG00000063583.6	3	ENSMUST00000217316.1,ENSMUST00000216553.1,ENSMUST00000079790.4	2,3,2	7925,5430,967	1099,1525,41	7131,5103,960	1099,1099,41	968,968,0	2,3,1
ENSMUSG00000061616.5	chr1	92617788	92623412	+	4158	0	0	0	0	0	0	0	0	0	Olfr12	ENSMUSG00000061616.5	2	ENSMUST00000213247.1,ENSMUST00000081274.5	2,1	4156,1120	1468,0	3666,1120	1468,0	1001,1001	2,1
ENSMUSG00000073616.10	chr1	92637145	92641985	-	1499	12230	13712	11424	11743	12694	12830	12534	12782	14308	Myeov2	ENSMUSG00000073616.10	5	ENSMUST00000154129.7,ENSMUST00000112999.7,ENSMUST00000148508.1,ENSMUST00000097642.3,ENSMUST00000129730.1	2,3,3,3,2	480,650,646,435,494	2284,2769,4132,4405,2121	258,320,316,258,389	2284,2284,2284,2284,2121	0,0,461,0,0	4,3,1,3,4
ENSMUSG00000044055.5	chr1	92644218	92648841	-	3082	0	0	3	0	3	0	0	0	0	Otos	ENSMUSG00000044055.5	2	ENSMUST00000053144.3,ENSMUST00000159803.1	5,4	699,2986	3924,1049	299,2570	2875,665	0,0	5,6
ENSMUSG00000100546.1	chr1	92714234	92717202	-	1078	9	11	23	8	2	8	6	6	1	Gm29483	ENSMUSG00000100546.1	1	ENSMUST00000188188.1	2	1076	1892	838	1892	0	4
ENSMUSG00000099665.1	chr1	92759213	92760480	-	230	0	0	3	0	0	0	0	0	0	Gm29482	ENSMUSG00000099665.1	1	ENSMUST00000187845.1	2	228	1039	131	1039	0	4
ENSMUSG00000100781.1	chr1	92820958	92837896	-	1049	1	1	0	7	0	2	1	0	1	Gm29481	ENSMUSG00000100781.1	1	ENSMUST00000189080.1	2	1047	15891	766	15891	0	4
ENSMUSG00000034220.7	chr1	92831645	92860779	+	5159	21744	26446	23764	21671	20506	20508	9894	11295	10502	Gpc1	ENSMUSG00000034220.7	5	ENSMUST00000045970.7,ENSMUST00000191373.1,ENSMUST00000190586.1,ENSMUST00000190677.1,ENSMUST00000190215.1	9,2,3,3,2	4167,432,756,724,696	24967,3276,2014,236,131	2447,304,388,555,349	21250,3276,1353,131,131	1665,0,0,0,0	1,-1,-1,-1,-1
ENSMUSG00000101995.1	chr1	92842177	92848771	-	1655	5	0	5	2	1	3	8	1	7	Gm29480	ENSMUSG00000101995.1	1	ENSMUST00000188589.1	4	1651	4943	1213	1845	0	6
ENSMUSG00000065470.1	chr1	92850378	92850443	+	66	3	0	0	2	0	0	1	0	0	Mir149	ENSMUSG00000065470.1	1	ENSMUST00000083536.1	1	65	0	65	0	0	-1
ENSMUSG00000034212.14	chr1	92859803	92902906	-	4846	35	49	32	55	42	56	18	22	49	Ankmy1	ENSMUSG00000034212.14	3	ENSMUST00000212504.1,ENSMUST00000160548.7,ENSMUST00000112998.1	3,18,18	1806,3228,3225	10111,29549,29552	1599,469,469	9407,7153,7153	1393,0,0	3,18,18
ENSMUSG00000047067.7	chr1	92906981	92908435	+	1314	1016	1166	897	944	963	998	899	851	1029	Dusp28	ENSMUSG00000047067.7	1	ENSMUST00000060913.7	2	1312	142	870	142	490	1
ENSMUSG00000097251.2	chr1	92908378	92910764	-	1787	137	106	58	122	100	93	61	83	179	5033417F24Rik	ENSMUSG00000097251.2	1	ENSMUST00000181575.2	2	1785	601	1600	601	0	4
ENSMUSG00000026269.14	chr1	92910783	92924384	+	9467	801	951	846	786	779	976	620	806	814	Rnpepl1	ENSMUSG00000026269.14	12	ENSMUST00000027487.14,ENSMUST00000179854.7,ENSMUST00000180306.1,ENSMUST00000178116.7,ENSMUST00000179993.1,ENSMUST00000178816.7,ENSMUST00000179127.7,ENSMUST00000178662.7,ENSMUST00000178361.1,ENSMUST00000179837.1,ENSMUST00000178778.1,ENSMUST00000179531.1	11,8,1,5,3,8,7,5,3,3,4,2	3326,4337,2555,785,515,2496,1837,817,415,397,701,4032	6732,5410,0,4831,4209,2232,1944,1594,646,1521,1100,738	1279,1085,2555,362,274,1010,1010,343,248,192,330,2513	3576,3576,0,3576,3576,812,780,747,374,774,747,738	2152,0,0,516,0,0,1120,0,0,0,0,241	1,-1,-1,-1,-1,-1,-1,-1,-1,-1,-1,-1
ENSMUSG00000100632.1	chr1	92933526	92950590	-	1689	186	247	86	192	129	162	119	219	188	9430060I03Rik	ENSMUSG00000100632.1	1	ENSMUST00000191563.1	2	1687	15377	1577	15377	0	4
ENSMUSG00000026270.11	chr1	92934376	92947941	+	4346	5377	6893	5678	5509	5435	5401	5163	4924	6519	Capn10	ENSMUSG00000026270.11	7	ENSMUST00000027488.10,ENSMUST00000117814.7,ENSMUST00000152983.7,ENSMUST00000187342.1,ENSMUST00000128429.1,ENSMUST00000153828.1,ENSMUST00000136598.1	12,4,11,6,2,2,2	2890,1264,2160,746,827,315,456	10675,4942,10936,3898,213,87,249	638,689,420,202,762,270,375	2931,2931,2931,1982,213,87,249	1989,791,1515,534,0,0,0	1,1,1,-1,-1,-1,-1
ENSMUSG00000026271.15	chr1	92950865	92986391	+	4839	12	18	11	17	26	25	28	26	25	Gpr35	ENSMUSG00000026271.15	6	ENSMUST00000185421.1,ENSMUST00000189697.1,ENSMUST00000186298.6,ENSMUST00000027489.8,ENSMUST00000064480.6,ENSMUST00000169198.2	2,3,2,2,2,2	244,695,2645,3268,3407,4212	31577,26150,9277,9863,7110,3257	128,451,2486,3109,3306,3833	31577,25421,9277,9863,7110,3257	0,0,923,275,923,923	2,3,2,2,2,2
ENSMUSG00000100021.1	chr1	92999396	93002771	-	2126	0	0	0	0	0	0	0	0	0	Gm18697	ENSMUSG00000100021.1	1	ENSMUST00000191179.1	3	2123	1252	1274	848	0	5
ENSMUSG00000045091.4	chr1	93006334	93012269	+	1088	0	0	0	0	0	0	0	0	0	Aqp12	ENSMUSG00000045091.4	1	ENSMUST00000059676.4	3	1085	4850	675	3298	870	1
ENSMUSG00000014602.15	chr1	93015464	93101951	-	9330	18559	24144	22899	27273	23809	26347	20689	26945	28270	Kif1a	ENSMUSG00000014602.15	11	ENSMUST00000171796.7,ENSMUST00000112958.8,ENSMUST00000190723.6,ENSMUST00000171556.7,ENSMUST00000086819.11,ENSMUST00000188136.1,ENSMUST00000190854.1,ENSMUST00000188493.1,ENSMUST00000186828.1,ENSMUST00000190249.1,ENSMUST00000186861.1	48,48,49,47,47,4,4,7,6,4,5	8158,5883,6092,5344,5050,577,647,563,621,321,523	78200,78197,77919,78223,58914,1810,3065,62240,11183,2305,23587	3035,748,559,219,200,200,373,164,206,111,164	19283,19283,19283,19283,11111,1017,1097,38024,5566,1351,18550	0,0,0,0,0,441,0,0,390,0,0	48,48,49,47,47,2,6,9,3,6,7
ENSMUSG00000101378.1	chr1	93122931	93124103	-	317	0	0	0	0	0	0	0	0	0	Gm28086	ENSMUSG00000101378.1	1	ENSMUST00000191586.1	2	315	857	213	857	0	4
ENSMUSG00000026272.6	chr1	93135240	93145421	+	1697	0	0	0	0	0	0	0	0	0	Agxt	ENSMUSG00000026272.6	3	ENSMUST00000027491.6,ENSMUST00000191039.1,ENSMUST00000190603.1	11,3,7	1542,399,928	8639,2035,4610	361,233,357	1918,1494,1918	1234,0,0	1,-1,-1
ENSMUSG00000034159.12	chr1	93151349	93160948	-	2368	11	12	12	4	9	8	7	11	9	2310007B03Rik	ENSMUSG00000034159.12	2	ENSMUST00000043718.11,ENSMUST00000143419.1	6,6	2293,2068	7306,7219	751,749	3397,3397	0,0	6,6
ENSMUSG00000084989.3	chr1	93168725	93231072	+	7132	40	79	57	69	27	69	28	58	91	Crocc2	ENSMUSG00000084989.3	1	ENSMUST00000138595.2	32	7100	55247	2283	11206	4885	1
ENSMUSG00000047793.13	chr1	93235841	93301065	+	9491	624	1078	817	789	682	1198	551	987	814	Sned1	ENSMUSG00000047793.13	6	ENSMUST00000062202.13,ENSMUST00000172289.7,ENSMUST00000165843.1,ENSMUST00000163688.1,ENSMUST00000168122.1,ENSMUST00000165883.1	31,23,7,12,5,2	9116,3734,746,1707,674,437	56108,44922,7140,12843,8960,466	4798,485,173,296,209,331	20064,20064,5011,5635,5635,466	4181,0,0,0,0,0	1,-1,-1,-1,-1,-1
ENSMUSG00000098997.1	chr1	93274549	93274610	+	62	7	11	10	13	7	8	9	14	10	Mir6901	ENSMUSG00000098997.1	1	ENSMUST00000185062.1	1	61	0	61	0	0	-1
ENSMUSG00000026273.13	chr1	93299211	93305915	-	5271	4072	4719	3882	4624	4369	4161	5221	4527	6137	Mterf4	ENSMUSG00000026273.13	5	ENSMUST00000112944.7,ENSMUST00000027492.13,ENSMUST00000136754.1,ENSMUST00000112942.1,ENSMUST00000152307.1	4,4,2,3,2	3093,1362,475,1522,1662	3559,3348,999,2425,719	2373,590,243,985,1608	1706,1706,999,1706,719	0,0,0,0,0	4,4,4,3,4
ENSMUSG00000101172.1	chr1	93305964	93317309	+	885	18	33	22	34	8	14	53	30	38	Gm28535	ENSMUSG00000101172.1	1	ENSMUST00000188069.1	3	882	10463	658	10027	0	-1
ENSMUSG00000100351.1	chr1	93306694	93307239	-	546	19	4	7	13	10	17	1	13	18	Gm7867	ENSMUSG00000100351.1	1	ENSMUST00000189856.1	1	545	0	545	0	0	3
ENSMUSG00000026274.11	chr1	93308770	93343482	-	9060	5460	6530	5846	5017	5347	6542	3434	4102	3796	Pask	ENSMUSG00000026274.11	6	ENSMUST00000128655.7,ENSMUST00000027493.3,ENSMUST00000133886.1,ENSMUST00000148355.1,ENSMUST00000139028.1,ENSMUST00000128253.1	6,18,3,2,12,2	2483,5761,909,740,5629,347	6160,28250,2401,519,20008,5686	1479,1471,411,576,2299,216	2305,4946,1882,519,5678,5686	0,0,0,0,0,0	8,18,5,4,14,4
ENSMUSG00000026275.13	chr1	93342854	93373489	+	10495	9311	11929	9804	9834	9535	10486	7466	9344	10728	Ppp1r7	ENSMUSG00000026275.13	3	ENSMUST00000027494.10,ENSMUST00000185498.6,ENSMUST00000127141.1	10,5,6	10305,438,628	20330,8556,8245	8599,132,310	4078,6614,4038	1076,0,323	1,1,-1
ENSMUSG00000106302.1	chr1	93346092	93346155	+	64	33	30	26	33	26	34	14	23	26	Mir6902	ENSMUSG00000106302.1	1	ENSMUST00000198980.1	1	63	0	63	0	0	-1
ENSMUSG00000098689.1	chr1	93352158	93352285	+	128	0	0	0	4	1	0	0	8	0	Mir6345	ENSMUSG00000098689.1	1	ENSMUST00000184286.1	1	127	0	127	0	0	-1
ENSMUSG00000064389.1	chr1	93363255	93363357	+	103	5	0	3	3	6	0	1	3	0	Gm26446	ENSMUSG00000064389.1	1	ENSMUST00000082455.1	1	102	0	102	0	0	-1
ENSMUSG00000034107.10	chr1	93373930	93404303	+	3984	0	3	0	2	3	0	0	0	0	Ano7	ENSMUSG00000034107.10	3	ENSMUST00000058682.10,ENSMUST00000186641.6,ENSMUST00000190340.1	24,24,3	2939,3960,752	26533,26413,957	332,1353,620	4266,4266,723	2509,2557,206	2,2,-1
ENSMUSG00000034088.15	chr1	93405940	93478815	-	11320	29405	40859	35261	34886	31381	37505	31123	38341	41254	Hdlbp	ENSMUSG00000034088.15	11	ENSMUST00000170883.7,ENSMUST00000042498.13,ENSMUST00000186164.6,ENSMUST00000189951.6,ENSMUST00000190321.6,ENSMUST00000188988.6,ENSMUST00000186787.6,ENSMUST00000189025.6,ENSMUST00000185349.6,ENSMUST00000188165.1,ENSMUST00000188844.1	28,28,25,9,4,4,5,6,3,3,1	6203,4399,3783,2163,524,736,666,844,627,338,3207	66658,33525,29007,14920,14140,8790,7647,40816,4724,37351,0	2319,497,257,916,206,281,190,255,494,170,3207	36463,5576,5576,5576,10668,5576,3039,19094,3330,35957,0	0,0,0,0,0,0,0,0,0,0,0	28,28,25,11,6,6,7,8,5,5,3
ENSMUSG00000090489.3	chr1	93421700	93422488	+	789	25	16	8	12	4	2	8	9	11	Gm17415	ENSMUSG00000090489.3	1	ENSMUST00000096427.5	1	788	0	788	0	0	-1
ENSMUSG00000026276.17	chr1	93478964	93510260	+	7979	73159	85318	72975	73890	76691	75897	92749	91264	102832	Sept2	ENSMUSG00000026276.17	16	ENSMUST00000027495.14,ENSMUST00000136182.7,ENSMUST00000131175.8,ENSMUST00000179353.7,ENSMUST00000172165.7,ENSMUST00000152778.1,ENSMUST00000153826.7,ENSMUST00000188923.1,ENSMUST00000129211.7,ENSMUST00000168776.7,ENSMUST00000112912.7,ENSMUST00000149532.7,ENSMUST00000142401.7,ENSMUST00000150931.1,ENSMUST00000152476.1,ENSMUST00000157021.1	13,5,8,13,12,5,6,1,8,13,8,6,6,8,2,2	3766,507,722,3206,3180,691,418,3309,776,3254,748,471,546,771,464,416	27530,19615,20784,27534,27560,18037,17902,0,20668,27418,20672,19339,19343,20282,1362,1362	2547,123,134,2020,2020,408,135,3309,134,2020,134,123,123,134,408,383	10056,12089,10060,10060,12089,10056,9525,0,9944,9944,9948,9810,9814,9558,1362,1362	1075,0,0,1075,956,0,0,0,0,1075,0,0,0,0,0,134	2,2,2,2,2,-1,3,-1,2,2,2,2,1,2,-1,-1
ENSMUSG00000034066.13	chr1	93512079	93621976	+	5235	774	1003	988	865	1005	1204	856	914	1080	Farp2	ENSMUSG00000034066.13	2	ENSMUST00000120301.7,ENSMUST00000122402.2	27,13	3910,2803	105987,66381	752,1556	31457,31457	3172,2376	2,2
ENSMUSG00000103854.1	chr1	93531815	93534202	+	2388	6	8	7	6	10	4	0	8	3	Gm37250	ENSMUSG00000103854.1	1	ENSMUST00000194919.1	1	2387	0	2387	0	0	-1
ENSMUSG00000026277.13	chr1	93619751	93658659	-	5812	18173	20641	18280	19887	19068	19792	16389	18195	20817	Stk25	ENSMUSG00000026277.13	6	ENSMUST00000027498.13,ENSMUST00000151068.7,ENSMUST00000154008.7,ENSMUST00000125778.1,ENSMUST00000133769.7,ENSMUST00000186287.1	12,11,4,3,6,6	4237,2810,701,534,848,634	11734,10917,2301,1858,8781,30893	2775,1082,327,327,230,230	6034,6034,1021,1021,6034,22674	0,0,0,0,0,0	12,13,6,5,8,8
ENSMUSG00000100927.1	chr1	93635193	93636509	+	1317	0	3	1	3	7	0	0	0	0	Gm28536	ENSMUSG00000100927.1	1	ENSMUST00000190971.1	1	1316	0	1316	0	0	-1
ENSMUSG00000026278.14	chr1	93685660	93695764	+	1840	2864	3651	2653	2732	2811	3100	2172	2468	2953	Bok	ENSMUSG00000026278.14	5	ENSMUST00000027499.12,ENSMUST00000201863.3,ENSMUST00000188394.1,ENSMUST00000200888.1,ENSMUST00000185685.1	5,5,3,4,3	1463,878,544,736,732	8641,8630,7263,5525,906	727,262,406,432,418	4775,4775,4775,4775,814	638,638,0,394,0	2,2,1,-1,-1
ENSMUSG00000026279.14	chr1	93701935	93754864	-	6519	1811	2146	1998	1703	1814	1861	2152	1874	2527	Thap4	ENSMUSG00000026279.14	6	ENSMUST00000190116.6,ENSMUST00000189728.6,ENSMUST00000112905.3,ENSMUST00000187445.1,ENSMUST00000189472.1,ENSMUST00000189173.1	6,5,6,3,4,3	5552,708,2090,528,596,1998	47293,25831,47384,9063,34578,28003	3720,268,1047,264,221,1138	24531,9243,24622,7484,24531,24531	0,0,0,438,54,0	6,5,3,2,4,5
ENSMUSG00000101952.1	chr1	93731104	93751072	+	982	0	0	0	1	0	0	1	0	0	Gm10550	ENSMUSG00000101952.1	1	ENSMUST00000188846.1	3	979	18989	774	18500	0	-1
ENSMUSG00000026280.17	chr1	93751500	93790610	+	8278	11048	13270	11347	10114	10652	10286	10191	10172	13034	Atg4b	ENSMUSG00000026280.17	11	ENSMUST00000149436.7,ENSMUST00000027502.15,ENSMUST00000187824.6,ENSMUST00000185482.6,ENSMUST00000135762.7,ENSMUST00000189152.1,ENSMUST00000186001.1,ENSMUST00000189872.1,ENSMUST00000186811.1,ENSMUST00000186124.1,ENSMUST00000185754.1	6,13,6,9,12,2,4,2,4,2,2	507,4160,414,910,4174,341,561,475,499,452,599	23676,31545,22886,28978,28960,12597,6810,263,2581,545,1082	101,2924,101,193,2736,294,315,328,191,383,386	16472,12999,12999,12999,12999,12597,5446,263,1082,545,1082	0,1169,0,426,0,0,0,0,190,0,0	1,1,1,1,-1,-1,-1,-1,-1,-1,-1
ENSMUSG00000026281.15	chr1	93792576	93801934	-	2631	11462	14019	10771	11579	11555	11525	10049	11242	11466	Dtymk	ENSMUSG00000026281.15	4	ENSMUST00000027503.13,ENSMUST00000112893.1,ENSMUST00000144106.1,ENSMUST00000112890.2	5,3,2,2	998,1037,675,1053	8360,5240,306,788	367,621,585,845	3457,3457,306,788	0,0,0,0	5,3,4,2
ENSMUSG00000026283.13	chr1	93803965	93822101	+	4729	8402	10039	7983	7712	8139	7505	5513	7315	5892	Ing5	ENSMUSG00000026283.13	3	ENSMUST00000027505.12,ENSMUST00000188402.1,ENSMUST00000190476.1	8,8,8	4525,4530,910	13605,13588,13127	3814,3820,172	5663,5646,5663	715,123,635	1,1,2
ENSMUSG00000088961.1	chr1	93808570	93808671	-	102	0	0	0	0	0	0	0	0	0	Gm22089	ENSMUSG00000088961.1	1	ENSMUST00000158336.1	1	101	0	101	0	0	3
ENSMUSG00000073609.9	chr1	93824909	93852348	+	4281	957	949	888	968	965	932	826	962	951	D2hgdh	ENSMUSG00000073609.9	8	ENSMUST00000187321.1,ENSMUST00000097633.9,ENSMUST00000112881.7,ENSMUST00000149397.7,ENSMUST00000189154.1,ENSMUST00000141701.1,ENSMUST00000186783.1,ENSMUST00000188532.1	2,10,10,3,4,3,3,2	315,3222,3449,787,677,686,304,231	1234,23886,23625,2829,11104,3060,7876,8925	173,1781,1781,588,355,551,168,132	1234,9140,9140,2335,8044,2566,5391,8925	0,1599,1664,0,0,0,110,0	2,2,1,-1,1,-1,-1,-1
ENSMUSG00000094651.2	chr1	93861306	93876494	+	3063	0	0	0	0	0	0	0	0	0	Gal3st2	ENSMUSG00000094651.2	3	ENSMUST00000190710.1,ENSMUST00000094663.3,ENSMUST00000187896.1	4,4,2	349,2840,365	11955,12308,11633	178,2223,234	10498,10836,11633	0,1187,0	-1,1,2
ENSMUSG00000101660.1	chr1	93906244	93916768	+	958	0	0	0	0	5	0	0	0	1	Gm18666	ENSMUSG00000101660.1	1	ENSMUST00000190039.1	6	952	9572	256	2689	0	-1
ENSMUSG00000093805.7	chr1	93918311	93942650	+	2748	0	0	0	0	0	22	1	0	0	Gm9994	ENSMUSG00000093805.7	2	ENSMUST00000178757.7,ENSMUST00000177958.1	4,4	2718,1187	21621,12015	2229,818	20149,10543	1181,1187	1,1
ENSMUSG00000099624.1	chr1	93975353	93985816	+	958	0	2	0	2	1	5	1	0	0	Gm7889	ENSMUSG00000099624.1	1	ENSMUST00000185591.1	6	952	9511	256	2630	0	-1
ENSMUSG00000073608.4	chr1	93990509	94017147	+	9667	0	0	0	0	0	0	0	0	0	Gm6086	ENSMUSG00000073608.4	1	ENSMUST00000097632.4	8	9659	16979	8440	10515	1187	5
ENSMUSG00000034000.15	chr1	94020451	94028334	+	4637	0	0	0	0	0	0	0	1	0	Neu4	ENSMUSG00000034000.15	2	ENSMUST00000190212.6,ENSMUST00000050890.7	5,4	1714,4507	3251,3334	979,3897	1489,1742	1502,1434	2,2
ENSMUSG00000026285.7	chr1	94038305	94052553	-	1930	0	0	0	1	0	0	1	0	0	Pdcd1	ENSMUSG00000026285.7	1	ENSMUST00000027507.7	5	1925	12323	1233	10900	0	5
ENSMUSG00000100990.1	chr1	94204417	94205259	+	843	0	0	0	4	0	0	0	0	0	Gm7891	ENSMUSG00000100990.1	1	ENSMUST00000190284.1	1	842	0	842	0	0	-1
ENSMUSG00000100347.1	chr1	94468715	94469887	-	1173	20	15	18	27	20	34	22	29	35	Gm7895	ENSMUSG00000100347.1	1	ENSMUST00000187459.1	1	1172	0	1172	0	0	3
ENSMUSG00000077413.1	chr1	94615636	94615704	-	69	0	0	0	0	0	0	0	0	0	Gm23389	ENSMUSG00000077413.1	1	ENSMUST00000104225.1	1	68	0	68	0	0	3
ENSMUSG00000100518.1	chr1	94797083	94802472	+	1607	0	0	0	0	2	0	0	0	0	4930440C22Rik	ENSMUSG00000100518.1	2	ENSMUST00000190754.1,ENSMUST00000185490.1	5,4	507,1561	4862,3469	175,1018	1657,1657	0,0	-1,-1
ENSMUSG00000089310.1	chr1	95039934	95040043	-	110	0	0	0	0	0	0	0	0	0	Gm23181	ENSMUSG00000089310.1	1	ENSMUST00000158685.1	1	109	0	109	0	0	3
ENSMUSG00000099592.1	chr1	95255963	95256810	-	848	0	0	0	0	0	0	0	0	0	Gm5264	ENSMUSG00000099592.1	1	ENSMUST00000190584.1	1	847	0	847	0	0	3
ENSMUSG00000051185.9	chr1	95313623	95335284	+	4814	5486	6525	5357	4819	5281	5254	3798	3949	4640	Fam174a	ENSMUSG00000051185.9	2	ENSMUST00000059975.7,ENSMUST00000186780.1	3,2	2109,3458	19552,10859	1348,2836	10859,10859	570,571	1,1
ENSMUSG00000103973.1	chr1	95328681	95331218	+	2538	50	28	27	81	35	27	23	42	35	BC055308	ENSMUSG00000103973.1	1	ENSMUST00000193380.1	1	2537	0	2537	0	0	-1
ENSMUSG00000081051.4	chr1	95498621	95499151	+	531	350	359	288	323	368	294	347	331	375	Gm15427	ENSMUSG00000081051.4	1	ENSMUST00000117288.1	1	530	0	530	0	0	-1
ENSMUSG00000040710.10	chr1	95587682	95667571	-	20091	15943	16797	13459	14649	16663	16786	10565	11024	13387	St8sia4	ENSMUSG00000040710.10	4	ENSMUST00000043336.10,ENSMUST00000189556.1,ENSMUST00000187936.1,ENSMUST00000186853.1	5,4,2,1	5385,10023,3100,3611	74504,38961,6154,0	4282,9249,2681,3611	35543,25713,6154,0	0,0,0,0	5,4,4,3
ENSMUSG00000103197.1	chr1	95646774	95648508	-	1735	128	127	86	152	113	114	68	130	83	Gm37642	ENSMUSG00000103197.1	1	ENSMUST00000193166.1	1	1734	0	1734	0	0	3
ENSMUSG00000100777.1	chr1	95701184	95716518	-	761	0	0	0	0	0	0	0	0	0	4930598F16Rik	ENSMUSG00000100777.1	1	ENSMUST00000187352.1	4	757	14577	312	11106	0	6
ENSMUSG00000102718.1	chr1	95738196	95740293	+	2098	0	0	1	1	2	0	0	0	0	Gm37761	ENSMUSG00000102718.1	1	ENSMUST00000194989.1	1	2097	0	2097	0	0	-1
ENSMUSG00000095955.1	chr1	95832129	95832235	-	107	29	16	12	9	26	8	19	15	18	Gm22360	ENSMUSG00000095955.1	1	ENSMUST00000179775.1	1	106	0	106	0	0	3
ENSMUSG00000100062.1	chr1	95990659	96021758	-	356	0	0	0	0	0	0	0	0	0	1700063A18Rik	ENSMUSG00000100062.1	1	ENSMUST00000190901.1	3	353	30746	244	26235	0	5
ENSMUSG00000080345.3	chr1	96266853	96266941	-	89	0	0	0	0	0	0	0	0	0	Gm24586	ENSMUSG00000080345.3	1	ENSMUST00000116695.3	1	88	0	88	0	0	3
ENSMUSG00000096585.1	chr1	96303146	96303255	+	110	0	0	0	0	0	0	0	0	0	Gm22917	ENSMUSG00000096585.1	1	ENSMUST00000180116.1	1	109	0	109	0	0	-1
ENSMUSG00000102658.1	chr1	96313242	96315535	+	2294	0	0	0	0	0	0	0	0	0	Gm37076	ENSMUSG00000102658.1	1	ENSMUST00000192033.1	1	2293	0	2293	0	0	-1
ENSMUSG00000100336.1	chr1	96543059	96556703	-	1349	0	0	0	0	0	0	0	0	0	Gm29601	ENSMUSG00000100336.1	1	ENSMUST00000187961.1	2	1347	12297	1275	12297	0	4
ENSMUSG00000100589.1	chr1	96612057	96662573	-	583	0	0	0	0	0	0	0	0	0	4930533P14Rik	ENSMUSG00000100589.1	1	ENSMUST00000189056.1	3	580	49936	274	47248	0	5
ENSMUSG00000095610.1	chr1	96617099	96617205	+	107	0	0	0	1	0	0	0	6	0	Gm26245	ENSMUSG00000095610.1	1	ENSMUST00000178491.1	1	106	0	106	0	0	-1
ENSMUSG00000100362.1	chr1	96645420	96646170	+	682	0	0	3	0	0	2	0	0	0	Gm1833	ENSMUSG00000100362.1	1	ENSMUST00000191608.1	2	680	70	494	70	0	-1
ENSMUSG00000077255.1	chr1	96762031	96762158	+	128	0	0	0	0	0	0	0	0	0	Gm26078	ENSMUSG00000077255.1	1	ENSMUST00000104067.1	1	127	0	127	0	0	-1
ENSMUSG00000040693.7	chr1	96816270	96872171	-	4908	11	10	14	6	22	25	18	11	8	Slco4c1	ENSMUSG00000040693.7	1	ENSMUST00000071985.5	13	4895	51006	2837	23070	0	13
ENSMUSG00000097814.5	chr1	96871126	96907796	+	4120	45	9	12	2	14	18	18	7	13	Panct2	ENSMUSG00000097814.5	3	ENSMUST00000188631.4,ENSMUST00000181489.2,ENSMUST00000202118.1	4,2,3	621,3847,407	36049,5166,5261	200,3400,183	35020,5166,5166	0,0,0	-1,-1,-1
ENSMUSG00000045463.15	chr1	96906176	96997577	-	2492	0	0	0	0	0	0	0	0	0	Slco6b1	ENSMUSG00000045463.15	2	ENSMUST00000167383.7,ENSMUST00000178359.2	15,12	2477,1766	88924,73553	455,260	22424,22424	0,0	17,14
ENSMUSG00000097480.1	chr1	97001820	97002783	-	964	0	0	0	0	0	0	0	0	0	Gm9499	ENSMUSG00000097480.1	1	ENSMUST00000180888.1	1	963	0	963	0	0	3
ENSMUSG00000100454.1	chr1	97024516	97025565	-	474	0	0	0	0	0	0	0	0	0	Gm28901	ENSMUSG00000100454.1	1	ENSMUST00000188810.1	2	472	577	405	577	0	4
ENSMUSG00000044757.7	chr1	97024681	97025928	+	1248	90	99	65	59	90	65	83	81	87	Gm6430	ENSMUSG00000044757.7	1	ENSMUST00000054664.7	1	1247	0	1247	0	0	-1
ENSMUSG00000026331.13	chr1	97059038	97128301	-	2842	2	2	1	0	0	0	0	0	0	Slco6c1	ENSMUSG00000026331.13	2	ENSMUST00000027569.13,ENSMUST00000189547.1	14,14	2733,2301	66435,66486	570,448	13633,13633	0,0	13,13
ENSMUSG00000100484.1	chr1	97162860	97310664	+	2039	0	1	0	1	1	1	0	0	3	Gm7133	ENSMUSG00000100484.1	1	ENSMUST00000187797.1	13	2026	145778	265	29838	0	-1
ENSMUSG00000101348.6	chr1	97346475	97573015	+	2255	0	0	0	0	0	0	0	0	0	Gm7135	ENSMUSG00000101348.6	2	ENSMUST00000191257.6,ENSMUST00000187538.1	12,5	1893,670	121611,112663	257,288	19729,81473	0,0	-1,-1
ENSMUSG00000103179.1	chr1	97544264	97545448	-	1185	1	5	0	11	0	1	0	0	2	Gm37171	ENSMUSG00000103179.1	1	ENSMUST00000192636.1	1	1184	0	1184	0	0	3
ENSMUSG00000044768.16	chr1	97606318	97662074	-	41324	6770	6936	5902	6367	6690	6532	8289	7420	9570	D1Ertd622e	ENSMUSG00000044768.16	4	ENSMUST00000053033.13,ENSMUST00000153115.7,ENSMUST00000149927.1,ENSMUST00000142234.1	3,3,2,3	40375,3492,2701,636	15381,14281,15470,15105	40043,2458,2458,426	8239,8239,15470,8239	-619,-619,-619,0	3,3,2,5
ENSMUSG00000040648.14	chr1	97706048	97770411	-	14381	19996	22798	18461	19097	20222	20516	21875	21870	25597	Ppip5k2	ENSMUSG00000040648.14	7	ENSMUST00000137758.1,ENSMUST00000042509.12,ENSMUST00000112845.7,ENSMUST00000171129.7,ENSMUST00000191556.1,ENSMUST00000189992.1,ENSMUST00000152788.1	3,28,31,27,3,1,2	4052,5854,6208,3398,558,2522,3842	5049,58509,58155,50475,4554,0,123	2145,1782,1782,223,414,2522,3101	3893,8034,8034,6690,3398,0,123	0,0,0,0,286,0,0	5,28,31,27,3,3,4
ENSMUSG00000026333.14	chr1	97770172	97793709	+	6048	2306	2554	2229	2157	2280	2421	2365	2330	2475	Gin1	ENSMUSG00000026333.14	7	ENSMUST00000112844.9,ENSMUST00000112842.7,ENSMUST00000027571.12,ENSMUST00000122925.1,ENSMUST00000138142.7,ENSMUST00000188101.1,ENSMUST00000189031.1	8,3,8,2,7,1,4	2038,1034,2486,515,1844,2325,413	20759,6926,21026,289,20952,0,7251	672,813,1412,461,709,2325,191	6039,5192,6039,289,7335,0,5619	1550,355,1283,0,241,0,182	2,2,2,-1,2,-1,-1
ENSMUSG00000026335.16	chr1	97795114	98095646	-	11892	22282	27276	26892	28575	27191	26809	26722	23179	32412	Pam	ENSMUSG00000026335.16	15	ENSMUST00000159041.7,ENSMUST00000058762.14,ENSMUST00000097625.9,ENSMUST00000161567.7,ENSMUST00000162681.1,ENSMUST00000159585.7,ENSMUST00000160210.1,ENSMUST00000162803.1,ENSMUST00000159131.1,ENSMUST00000161071.1,ENSMUST00000159841.1,ENSMUST00000159428.7,ENSMUST00000162426.1,ENSMUST00000186731.1,ENSMUST00000163007.1	4,26,26,24,5,5,2,6,2,2,4,4,3,1,3	705,4069,4076,3606,652,555,413,1039,657,568,556,1655,607,3893,1080	44992,270458,270461,152549,18016,12111,2848,14183,2202,10971,39206,41942,19241,0,36593	278,894,893,888,267,239,265,381,546,307,266,1267,387,3893,865	42571,118226,118226,31108,9467,5415,2848,5415,2202,10971,29226,31108,18289,0,21309	260,0,0,0,91,0,0,0,0,0,54,0,0,0,0	4,26,26,24,5,7,4,8,4,4,4,6,5,3,5
ENSMUSG00000104140.1	chr1	97878382	97880065	-	1684	45	41	32	51	76	39	34	30	70	Gm37140	ENSMUSG00000104140.1	1	ENSMUST00000192914.1	1	1683	0	1683	0	0	3
ENSMUSG00000089169.1	chr1	97936400	97936711	+	312	0	0	0	0	0	0	0	0	0	Gm25413	ENSMUSG00000089169.1	1	ENSMUST00000158544.1	1	311	0	311	0	0	-1
ENSMUSG00000089782.1	chr1	97948901	97949389	-	489	630	572	463	532	487	547	540	583	632	Gm3531	ENSMUSG00000089782.1	1	ENSMUST00000162698.1	1	488	0	488	0	0	3
ENSMUSG00000089706.7	chr1	98031116	98057680	-	5853	320	281	214	357	325	379	753	608	1118	B230216N24Rik	ENSMUSG00000089706.7	5	ENSMUST00000160588.1,ENSMUST00000159324.7,ENSMUST00000161661.1,ENSMUST00000159353.1,ENSMUST00000187924.1	2,3,4,3,1	3467,1137,715,342,1937	1092,15495,15361,25470,0	2559,981,451,156,1937	1092,14487,7389,23837,0	0,0,0,0,0	4,5,6,5,3
ENSMUSG00000096085.1	chr1	98049822	98049928	+	107	0	2	4	0	3	2	1	1	3	Gm24465	ENSMUSG00000096085.1	1	ENSMUST00000178398.1	1	106	0	106	0	0	-1
ENSMUSG00000100182.6	chr1	98131456	98144655	+	1882	6	10	2	2	8	26	13	5	19	1810006J02Rik	ENSMUSG00000100182.6	2	ENSMUST00000191060.6,ENSMUST00000186473.1	4,3	519,1684	6214,11504	248,1358	3714,9696	0,0	-1,-1
ENSMUSG00000100711.1	chr1	98173648	98190698	+	4176	18	20	14	4	13	5	4	19	4	Gm29461	ENSMUSG00000100711.1	1	ENSMUST00000189232.1	4	4172	12878	3854	10264	0	-1
ENSMUSG00000097608.1	chr1	98263523	98264506	+	984	6	7	8	6	3	5	4	3	8	Gm7952	ENSMUSG00000097608.1	1	ENSMUST00000180540.1	1	983	0	983	0	0	-1
ENSMUSG00000099634.1	chr1	98267151	98267438	+	288	15	11	15	24	11	13	17	13	11	Gm29462	ENSMUSG00000099634.1	1	ENSMUST00000191458.1	1	287	0	287	0	0	-1
ENSMUSG00000026336.13	chr1	98421124	98516991	+	3173	0	0	3	0	0	0	0	0	0	Slco6d1	ENSMUSG00000026336.13	4	ENSMUST00000027575.12,ENSMUST00000162468.7,ENSMUST00000160796.1,ENSMUST00000162782.1	14,15,13,3	2314,2825,2019,267	85942,93039,86074,9227	373,621,343,164	19836,17026,19836,7617	2039,947,1940,0	1,1,1,-1
ENSMUSG00000089791.1	chr1	98457768	98459162	+	1395	10	9	5	8	4	10	4	4	7	Gm3555	ENSMUSG00000089791.1	1	ENSMUST00000160287.1	1	1394	0	1394	0	0	-1
ENSMUSG00000096193.1	chr1	98549451	98549560	+	110	0	0	0	0	0	0	0	0	0	Gm26134	ENSMUSG00000096193.1	1	ENSMUST00000178484.1	1	109	0	109	0	0	-1
ENSMUSG00000100009.6	chr1	98589517	98607384	+	5950	6	0	7	16	14	6	0	10	0	Gm7967	ENSMUSG00000100009.6	3	ENSMUST00000191042.1,ENSMUST00000191409.6,ENSMUST00000190991.1	1,5,3	5041,1044,396	0,16823,17230	5041,441,201	0,7738,15474	0,0,0	-1,-1,-1
ENSMUSG00000099686.1	chr1	98764841	98765554	+	714	0	0	0	0	0	0	0	0	0	Gm29460	ENSMUSG00000099686.1	1	ENSMUST00000188607.1	1	713	0	713	0	0	-1
ENSMUSG00000087804.1	chr1	99017364	99017463	+	100	0	0	0	0	0	0	0	0	0	Gm23434	ENSMUSG00000087804.1	1	ENSMUST00000157179.1	1	99	0	99	0	0	-1
ENSMUSG00000099453.1	chr1	99638396	99640241	-	1846	0	0	0	0	0	0	0	0	0	Gm18248	ENSMUSG00000099453.1	1	ENSMUST00000191164.1	1	1845	0	1845	0	0	3
ENSMUSG00000067028.11	chr1	99772765	100485942	+	5205	386	357	350	294	309	417	97	103	159	Cntnap5b	ENSMUSG00000067028.11	3	ENSMUST00000086738.9,ENSMUST00000188735.1,ENSMUST00000185484.1	24,17,5	4003,3990,599	708081,384191,116611	344,1437,200	167797,84093,84093	3855,2749,0	1,-1,-1
ENSMUSG00000082431.3	chr1	99790429	99791025	-	597	306	237	176	212	244	250	195	187	253	Tdpx-ps1	ENSMUSG00000082431.3	1	ENSMUST00000117372.1	1	596	0	596	0	0	3
ENSMUSG00000104104.1	chr1	99847984	99850692	+	2709	0	0	2	3	8	0	0	0	3	Gm37877	ENSMUSG00000104104.1	1	ENSMUST00000191630.1	1	2708	0	2708	0	0	-1
ENSMUSG00000100662.1	chr1	100006021	100006584	+	564	1	2	0	0	0	0	0	1	6	Gm19029	ENSMUSG00000100662.1	1	ENSMUST00000189923.1	1	563	0	563	0	0	-1
ENSMUSG00000087883.1	chr1	100252917	100253048	-	132	0	0	0	0	0	0	0	0	0	Gm23602	ENSMUSG00000087883.1	1	ENSMUST00000157258.1	1	131	0	131	0	0	3
ENSMUSG00000099835.1	chr1	100282329	100282643	-	315	8	9	5	5	5	7	10	8	7	Gm29668	ENSMUSG00000099835.1	1	ENSMUST00000187802.1	1	314	0	314	0	0	3
ENSMUSG00000100794.1	chr1	100282791	100283280	+	490	2	0	0	1	0	0	0	8	9	Gm29667	ENSMUSG00000100794.1	1	ENSMUST00000190817.1	1	489	0	489	0	0	-1
ENSMUSG00000099427.1	chr1	100597075	100597627	+	553	0	0	0	0	0	0	0	0	0	Gm18700	ENSMUSG00000099427.1	1	ENSMUST00000185791.1	1	552	0	552	0	0	-1
ENSMUSG00000099892.1	chr1	100643582	100644248	+	667	0	0	0	0	0	0	0	0	0	Gm18185	ENSMUSG00000099892.1	1	ENSMUST00000186725.1	1	666	0	666	0	0	-1
ENSMUSG00000100977.1	chr1	100653800	100654156	+	357	0	0	0	0	0	0	0	0	0	Gm29334	ENSMUSG00000100977.1	1	ENSMUST00000190334.1	1	356	0	356	0	0	-1
ENSMUSG00000077039.1	chr1	100861793	100861901	+	109	0	0	0	0	0	0	0	0	0	Gm25537	ENSMUSG00000077039.1	1	ENSMUST00000103851.1	1	108	0	108	0	0	-1
ENSMUSG00000100684.1	chr1	101155809	101175202	+	845	0	0	0	0	0	0	0	0	0	Gm20268	ENSMUSG00000100684.1	1	ENSMUST00000187932.1	3	842	18551	565	12619	0	-1
ENSMUSG00000100088.1	chr1	101371628	101372076	+	449	0	0	0	0	0	0	0	0	0	Gm28801	ENSMUSG00000100088.1	1	ENSMUST00000188761.1	1	448	0	448	0	0	-1
ENSMUSG00000100222.1	chr1	101385886	101386590	+	705	16	17	9	26	18	15	11	9	16	Psmb6-ps2	ENSMUSG00000100222.1	1	ENSMUST00000187074.1	1	704	0	704	0	0	-1
ENSMUSG00000100065.1	chr1	101753814	101754543	-	730	0	0	0	0	0	0	0	0	0	Gm18969	ENSMUSG00000100065.1	1	ENSMUST00000189423.1	1	729	0	729	0	0	3
ENSMUSG00000100349.1	chr1	101880506	101880741	-	236	0	0	0	0	0	0	0	0	0	Gm28188	ENSMUSG00000100349.1	1	ENSMUST00000190483.1	1	235	0	235	0	0	3
ENSMUSG00000099375.1	chr1	101892958	101895091	-	2134	2	0	1	1	0	0	2	0	0	Gm28187	ENSMUSG00000099375.1	1	ENSMUST00000186885.1	1	2133	0	2133	0	0	3
ENSMUSG00000077295.1	chr1	102106449	102106580	-	132	0	0	0	0	0	0	0	0	0	Gm24122	ENSMUSG00000077295.1	1	ENSMUST00000104107.1	1	131	0	131	0	0	3
ENSMUSG00000099770.1	chr1	102161367	102161939	+	192	0	0	0	0	0	0	0	0	0	Gm28623	ENSMUSG00000099770.1	1	ENSMUST00000187219.1	2	190	382	114	382	0	-1
ENSMUSG00000088510.1	chr1	102413923	102414021	-	99	0	0	0	0	0	0	0	0	0	Gm23036	ENSMUSG00000088510.1	1	ENSMUST00000157885.1	1	98	0	98	0	0	3
ENSMUSG00000101890.1	chr1	102449353	102537656	+	1116	0	0	0	0	0	0	0	0	0	Gm3116	ENSMUSG00000101890.1	1	ENSMUST00000189440.1	6	1110	87193	248	46820	0	-1
ENSMUSG00000099989.1	chr1	102458656	102458922	-	267	2	1	0	0	2	2	0	2	1	Gm20281	ENSMUSG00000099989.1	1	ENSMUST00000188225.1	1	266	0	266	0	0	3
ENSMUSG00000087908.1	chr1	102953415	102953548	-	134	0	0	0	0	0	0	0	0	0	Gm22034	ENSMUSG00000087908.1	1	ENSMUST00000157283.1	1	133	0	133	0	0	3
ENSMUSG00000100955.1	chr1	103171926	103268593	+	753	0	0	0	0	0	0	0	0	0	Gm18728	ENSMUSG00000100955.1	1	ENSMUST00000186155.1	5	748	95919	208	45114	0	-1
ENSMUSG00000088594.1	chr1	103236626	103236767	-	142	0	0	0	0	0	0	0	0	0	Gm23965	ENSMUSG00000088594.1	1	ENSMUST00000157969.1	1	141	0	141	0	0	3
ENSMUSG00000099469.1	chr1	103363986	103423658	+	882	0	0	0	0	0	0	0	0	0	Gm29141	ENSMUSG00000099469.1	1	ENSMUST00000190357.1	5	877	58795	265	31578	0	-1
ENSMUSG00000102325.1	chr1	103724345	103727233	+	2889	2	0	0	0	0	0	0	0	0	Gm37789	ENSMUSG00000102325.1	1	ENSMUST00000192862.1	1	2888	0	2888	0	0	-1
ENSMUSG00000101297.1	chr1	104311721	104312027	+	307	0	0	0	0	0	0	0	0	0	Gm18447	ENSMUSG00000101297.1	1	ENSMUST00000187501.1	1	306	0	306	0	0	-1
ENSMUSG00000100059.1	chr1	104470941	104471416	-	476	0	0	0	0	0	0	0	0	0	Gm29140	ENSMUSG00000100059.1	1	ENSMUST00000190187.1	1	475	0	475	0	0	3
ENSMUSG00000088161.1	chr1	104485957	104486286	+	330	0	0	0	0	0	0	0	0	0	Gm23537	ENSMUSG00000088161.1	1	ENSMUST00000157536.1	1	329	0	329	0	0	-1
ENSMUSG00000099464.1	chr1	104513001	104514068	+	949	0	0	0	0	0	0	0	0	0	Gm5260	ENSMUSG00000099464.1	1	ENSMUST00000186157.1	2	947	120	705	120	0	-1
ENSMUSG00000100935.1	chr1	104609524	104610883	+	370	0	0	0	0	0	0	0	0	0	Gm29592	ENSMUSG00000100935.1	1	ENSMUST00000189434.1	2	368	991	198	991	0	-1
ENSMUSG00000099801.1	chr1	104632584	104633358	-	712	0	0	0	0	0	0	0	0	0	Gm29011	ENSMUSG00000099801.1	1	ENSMUST00000191059.1	2	710	64	574	64	0	4
ENSMUSG00000050840.8	chr1	104768529	104995481	+	4012	265	391	261	243	278	396	227	211	282	Cdh20	ENSMUSG00000050840.8	1	ENSMUST00000062528.8	12	4000	222952	1601	165059	2395	2
ENSMUSG00000103991.1	chr1	104776114	104779128	+	3015	28	34	12	8	24	39	41	68	68	Gm38031	ENSMUSG00000103991.1	1	ENSMUST00000191819.1	1	3014	0	3014	0	0	-1
ENSMUSG00000084704.1	chr1	104880924	104881035	-	112	0	0	0	0	0	0	0	0	0	n-R5s216	ENSMUSG00000084704.1	1	ENSMUST00000122755.1	1	111	0	111	0	0	3
ENSMUSG00000103060.1	chr1	104906523	104909331	+	2809	5	6	1	0	6	0	1	0	6	Gm36969	ENSMUSG00000103060.1	1	ENSMUST00000194551.1	1	2808	0	2808	0	0	-1
ENSMUSG00000089866.1	chr1	104911431	104912333	-	280	0	0	0	0	0	0	0	0	0	Gm15699	ENSMUSG00000089866.1	1	ENSMUST00000159213.1	2	278	624	206	624	0	4
ENSMUSG00000099669.1	chr1	105116454	105127366	+	469	0	0	0	0	0	0	0	0	0	Gm29012	ENSMUSG00000099669.1	1	ENSMUST00000187882.1	3	466	10446	242	6360	0	-1
ENSMUSG00000099702.1	chr1	105244425	105244661	+	237	0	0	0	0	0	0	0	0	0	Gm29013	ENSMUSG00000099702.1	1	ENSMUST00000187431.1	1	236	0	236	0	0	-1
[truncated: 47,806 more rows]

## Sheet: ciri2
#chrom	start	end	name	score	strand	mm10/ciri2.0.6/SRR1539408.ciri2.txt_BSJ	mm10/ciri2.0.6/SRR1539409.ciri2.txt_BSJ	mm10/ciri2.0.6/SRR1539410.ciri2.txt_BSJ	mm10/ciri2.0.6/SRR1539411.ciri2.txt_BSJ	mm10/ciri2.0.6/SRR1539412.ciri2.txt_BSJ	mm10/ciri2.0.6/SRR1539413.ciri2.txt_BSJ	mm10/ciri2.0.6/SRR1539414.ciri2.txt_BSJ	mm10/ciri2.0.6/SRR1539415.ciri2.txt_BSJ	mm10/ciri2.0.6/SRR1539416.ciri2.txt_BSJ	name	gids	ntids	tids	mature_length	exons	exon_no	flank_intron	intron_up	intron_down	host_exons	host_length	host_orf_length	dist5	dist3	comments	circ_type	aludist	aludist_up_down	aluname_up_down	aluscore_up_down	mirdist	mirdist_up_down	mirname_up_down	mirscore_up_down	b2dist	b2dist_up_down	b2name_up_down	b2score_up_down	b4dist	b4dist_up_down	b4name_up_down	b4score_up_down	l1dist	l1dist_up_down
[truncated: 18,131 more rows]
[truncated: 6 more columns]

[truncated: 1 more sheets: find_circ]
