# Supplementary material for: The RNA-binding protein SFPQ preserves long-intron splicing and regulates circRNA biogenesis in mammals
Source: eLife. 2021 Jan 21;10:e63088. doi: 10.7554/eLife.63088 (PMC7819710; doi:10.7554/eLife.63088)
Supplement: Supplementary file 6. — Mapping statistics and output from MACS2 analysis using quantseq data on HEK293T cells. [file elife-63088-supp6.xlsx]

## Sheet: stats
samples	reads	mapped	chimera	multimappers	multimappers_toomany	unmapped_tooshort	unmapped_other
hg19/STAR/Ctrl_siRNA1_rep1_N277_S1	20519286	13118565	254339	1767432	52757	5573504	7028
hg19/STAR/Ctrl_siRNA1_rep2_N277_S2	19432320	11762439	294879	1389802	49588	6223974	6517
hg19/STAR/Ctrl_siRNA2_rep1_N277_S3	17570920	9621365	239665	1502736	55011	6386626	5182
hg19/STAR/Ctrl_siRNA2_rep2_N277_S4	18955060	10759941	228312	1482296	43820	6662905	6098
hg19/STAR/NONO_siRNA1_rep1_N277_S9	10015648	5480094	89603	851998	25381	3655018	3157
hg19/STAR/NONO_siRNA1_rep2_N277_S10	13557881	7449541	227617	1236910	50109	4817457	3864
hg19/STAR/NONO_siRNA2_rep1_N277_S11	10327205	5844931	132816	889028	26311	3564268	2667
hg19/STAR/NONO_siRNA2_rep2_N277_S12	11981518	6898179	160603	1018496	34894	4026493	3456
hg19/STAR/SFPQ_siRNA1_rep1_N277_S5	17763194	10605914	267742	1703463	51418	5396831	5568
hg19/STAR/SFPQ_siRNA1_rep2_N277_S6	13937150	8914181	213962	1386550	50189	3581473	4757
hg19/STAR/SFPQ_siRNA2_rep1_N277_S7	16794671	9172700	148222	1465004	40664	6111678	4625
hg19/STAR/SFPQ_siRNA2_rep2_N277_S8	14969322	8970860	191927	1273490	33931	4686326	4715

## Sheet: peaks_plus
# Program:featureCounts v2.0.0; Command:"/home/tbhmbi/software/subread-2.0.0-Linux-x86_64/bin/featureCounts" "-f" "-a" "hg19/macs2/macs2_2.9e9_plus_peaks.narrowPeak.gtf" "-o" "hg19/macs2/fc.macs2_2.9e9_plus_peaks.narrowPeak.gtf.exon.gene_id.mygtf.txt.tmp" "-t" "exon" "-g" "gene_id" "-s" "1" "-O" "hg19/STAR/Ctrl_siRNA1_rep1_N277_S1.bam" "hg19/STAR/Ctrl_siRNA1_rep2_N277_S2.bam" "hg19/STAR/Ctrl_siRN…
Geneid	Chr	Start	End	Strand	Length	hg19/STAR/Ctrl_siRNA1_rep1_N277_S1.bam	hg19/STAR/Ctrl_siRNA1_rep2_N277_S2.bam	hg19/STAR/Ctrl_siRNA2_rep1_N277_S3.bam	hg19/STAR/Ctrl_siRNA2_rep2_N277_S4.bam	hg19/STAR/NONO_siRNA1_rep1_N277_S9.bam	hg19/STAR/NONO_siRNA1_rep2_N277_S10.bam	hg19/STAR/NONO_siRNA2_rep1_N277_S11.bam	hg19/STAR/NONO_siRNA2_rep2_N277_S12.bam	hg19/STAR/SFPQ_siRNA1_rep1_N277_S5.bam	hg19/STAR/SFPQ_siRNA1_rep2_N277_S6.bam	hg19/STAR/SFPQ_siRNA2_rep1_N277_S7.bam	hg19/STAR/SFPQ_siRNA2_rep2_N277_S8.bam
macs2_2.9e9_plus_peak_1	chr1	29983	30282	+	300	0	0	0	0	0	0	0	0	0	0	0	0
macs2_2.9e9_plus_peak_2	chr1	30621	30832	+	212	0	0	1	0	0	0	0	0	0	0	0	0
macs2_2.9e9_plus_peak_3	chr1	522079	522278	+	200	0	0	0	0	0	0	0	0	0	0	0	0
macs2_2.9e9_plus_peak_4	chr1	564524	565383	+	860	19	19	18	10	4	6	10	14	12	10	13	14
macs2_2.9e9_plus_peak_5	chr1	566182	566833	+	652	4	5	9	6	2	6	2	6	5	4	6	2
macs2_2.9e9_plus_peak_6	chr1	567262	567612	+	351	8	6	3	4	3	4	4	6	9	4	6	1
macs2_2.9e9_plus_peak_7	chr1	567837	568177	+	341	166	150	210	173	103	201	127	144	279	161	247	207
macs2_2.9e9_plus_peak_8	chr1	568799	569006	+	208	48	47	25	18	12	22	15	21	14	13	13	23
macs2_2.9e9_plus_peak_9	chr1	569335	570092	+	758	88	74	47	43	26	51	36	45	60	31	67	61
macs2_2.9e9_plus_peak_10	chr1	715272	715477	+	206	10	5	2	8	1	5	4	1	4	2	2	2
macs2_2.9e9_plus_peak_11	chr1	717278	717539	+	262	3	3	7	2	0	0	1	0	0	2	1	1
macs2_2.9e9_plus_peak_12	chr1	723592	723803	+	212	1	4	0	4	0	2	1	0	0	3	5	0
macs2_2.9e9_plus_peak_13	chr1	724880	725294	+	415	5	5	2	5	3	1	1	3	1	1	4	2
macs2_2.9e9_plus_peak_14	chr1	725523	726310	+	788	23	16	5	13	5	7	4	11	10	8	16	12
macs2_2.9e9_plus_peak_15	chr1	726786	727039	+	254	3	3	2	2	2	0	1	2	0	0	0	2
macs2_2.9e9_plus_peak_16	chr1	737168	737385	+	218	1	2	0	3	0	1	1	1	1	1	2	2
macs2_2.9e9_plus_peak_17	chr1	739047	739248	+	202	0	0	0	0	0	0	0	0	0	0	0	0
macs2_2.9e9_plus_peak_18	chr1	763062	763301	+	240	12	0	1	4	1	4	5	1	4	10	9	9
macs2_2.9e9_plus_peak_19	chr1	767224	767424	+	201	3	0	0	0	2	1	0	2	7	1	0	0
macs2_2.9e9_plus_peak_20	chr1	774346	774737	+	392	9	3	5	2	5	2	2	1	7	4	3	5
macs2_2.9e9_plus_peak_21	chr1	775570	775815	+	246	4	1	4	1	1	2	4	1	4	2	6	3
macs2_2.9e9_plus_peak_22	chr1	778782	778981	+	200	2	3	2	0	1	0	3	1	1	0	4	3
macs2_2.9e9_plus_peak_23	chr1	779808	780081	+	274	3	5	2	7	0	0	1	2	8	2	2	6
macs2_2.9e9_plus_peak_24	chr1	783476	783721	+	246	2	0	2	1	3	0	2	0	9	4	7	2
macs2_2.9e9_plus_peak_25	chr1	789247	789908	+	662	55	60	45	46	26	42	35	36	38	57	59	47
macs2_2.9e9_plus_peak_26	chr1	794283	794482	+	200	0	3	0	1	0	0	0	0	2	2	1	2
macs2_2.9e9_plus_peak_27	chr1	794638	794938	+	301	3	9	3	3	0	2	1	2	6	4	3	2
macs2_2.9e9_plus_peak_28	chr1	840777	841280	+	504	9	8	9	20	4	8	8	8	27	9	13	11
macs2_2.9e9_plus_peak_29	chr1	842336	843066	+	731	116	125	111	114	92	104	83	140	344	291	344	268
macs2_2.9e9_plus_peak_30	chr1	847115	847331	+	217	7	15	14	32	17	27	14	24	58	20	38	43
macs2_2.9e9_plus_peak_31	chr1	850094	850481	+	388	36	66	18	37	22	33	18	39	110	93	78	87
macs2_2.9e9_plus_peak_32	chr1	852116	852351	+	236	6	4	12	10	8	11	5	8	23	23	32	17
macs2_2.9e9_plus_peak_33	chr1	853339	853655	+	317	13	8	5	12	9	16	15	7	50	17	25	16
macs2_2.9e9_plus_peak_34	chr1	856235	856512	+	278	6	11	3	0	2	2	1	4	21	15	12	7
macs2_2.9e9_plus_peak_35	chr1	863663	863871	+	209	3	2	3	6	3	3	2	3	8	4	9	6
macs2_2.9e9_plus_peak_36	chr1	866969	867606	+	638	119	107	159	163	66	80	81	99	119	113	109	111
macs2_2.9e9_plus_peak_37	chr1	875441	875695	+	255	28	9	28	44	27	29	23	23	73	60	46	40
macs2_2.9e9_plus_peak_38	chr1	879419	880094	+	676	284	207	364	311	199	324	221	274	750	721	777	600
macs2_2.9e9_plus_peak_39	chr1	900659	901230	+	572	800	532	656	659	361	483	442	475	727	554	614	499
macs2_2.9e9_plus_peak_40	chr1	910336	910673	+	338	18	19	16	31	13	12	13	23	73	60	50	49
macs2_2.9e9_plus_peak_41	chr1	911080	911369	+	290	10	10	6	7	4	6	3	10	14	8	5	9
macs2_2.9e9_plus_peak_42	chr1	916675	916886	+	212	0	0	0	0	0	1	0	0	3	5	4	6
macs2_2.9e9_plus_peak_43	chr1	934296	934495	+	200	3	1	5	4	1	0	0	4	8	0	1	8
macs2_2.9e9_plus_peak_44	chr1	936191	936580	+	390	69	74	50	60	34	27	27	26	47	26	49	40
macs2_2.9e9_plus_peak_45	chr1	942234	942639	+	406	8	5	13	12	8	10	4	3	11	5	13	8
macs2_2.9e9_plus_peak_46	chr1	944535	944835	+	301	9	17	6	5	3	5	4	5	7	12	14	5
macs2_2.9e9_plus_peak_47	chr1	945026	945227	+	202	8	19	3	6	2	8	5	3	15	9	3	8
macs2_2.9e9_plus_peak_48	chr1	945794	945996	+	203	6	8	11	11	2	3	1	2	19	20	3	13
macs2_2.9e9_plus_peak_49	chr1	946698	946962	+	265	12	11	6	13	7	5	2	5	8	12	19	11
macs2_2.9e9_plus_peak_50	chr1	949491	950045	+	555	51	34	19	18	9	21	8	20	29	31	28	24
macs2_2.9e9_plus_peak_51	chr1	958318	958517	+	200	0	0	0	1	1	0	2	0	2	3	1	0
macs2_2.9e9_plus_peak_52	chr1	983865	984299	+	435	9	8	15	8	6	7	6	9	22	14	12	5
macs2_2.9e9_plus_peak_53	chr1	991137	991641	+	505	262	304	191	275	146	218	178	199	325	210	282	205
macs2_2.9e9_plus_peak_54	chr1	1000823	1001110	+	288	6	5	11	11	7	11	5	4	20	9	14	16
macs2_2.9e9_plus_peak_55	chr1	1001372	1001952	+	581	53	42	30	30	19	47	27	31	55	49	29	27
macs2_2.9e9_plus_peak_56	chr1	1052625	1052835	+	211	4	0	1	1	2	0	0	0	2	2	1	2
macs2_2.9e9_plus_peak_57	chr1	1168784	1169647	+	864	558	382	390	335	176	254	223	299	425	378	426	308
macs2_2.9e9_plus_peak_58	chr1	1170092	1170538	+	447	84	72	44	50	27	44	29	33	54	69	60	56
macs2_2.9e9_plus_peak_59	chr1	1185090	1185289	+	200	2	0	4	3	0	1	1	0	2	1	1	0
macs2_2.9e9_plus_peak_60	chr1	1185722	1186037	+	316	2	2	3	6	0	4	0	2	1	2	3	0
macs2_2.9e9_plus_peak_61	chr1	1215107	1215627	+	521	13	6	12	14	3	10	7	3	9	11	15	18
macs2_2.9e9_plus_peak_62	chr1	1215816	1216015	+	200	0	2	4	0	1	1	0	4	5	1	3	0
macs2_2.9e9_plus_peak_63	chr1	1227004	1227535	+	532	135	87	139	98	65	83	47	76	136	113	107	111
macs2_2.9e9_plus_peak_64	chr1	1246040	1246608	+	569	16	11	17	11	3	17	16	17	9	11	3	12
macs2_2.9e9_plus_peak_65	chr1	1246762	1247189	+	428	130	78	122	117	83	108	93	110	134	105	107	127
macs2_2.9e9_plus_peak_66	chr1	1251274	1251717	+	444	22	14	9	18	6	22	3	7	24	28	16	17
macs2_2.9e9_plus_peak_67	chr1	1252509	1252907	+	399	30	45	22	19	14	25	6	7	56	32	46	26
macs2_2.9e9_plus_peak_68	chr1	1253103	1253371	+	269	5	15	2	8	2	12	6	4	9	15	10	5
macs2_2.9e9_plus_peak_69	chr1	1253608	1254126	+	519	10	5	6	6	13	8	8	1	11	24	17	9
macs2_2.9e9_plus_peak_70	chr1	1263824	1264416	+	593	36	44	34	44	20	40	14	16	41	34	39	38
macs2_2.9e9_plus_peak_71	chr1	1292974	1293450	+	477	25	25	28	39	11	24	29	20	40	39	46	43
macs2_2.9e9_plus_peak_72	chr1	1297202	1297510	+	309	5	6	2	3	1	6	4	1	11	10	6	2
macs2_2.9e9_plus_peak_73	chr1	1310921	1311510	+	590	5	6	10	6	2	6	1	3	2	1	1	1
macs2_2.9e9_plus_peak_74	chr1	1337022	1337566	+	545	302	280	149	229	107	178	92	140	229	262	230	248
macs2_2.9e9_plus_peak_75	chr1	1343548	1343918	+	371	7	5	3	0	1	3	2	1	1	2	7	2
macs2_2.9e9_plus_peak_76	chr1	1345876	1346198	+	323	15	13	14	5	4	7	1	2	9	13	8	5
macs2_2.9e9_plus_peak_77	chr1	1346771	1346974	+	204	3	2	0	2	2	2	3	0	1	1	2	4
macs2_2.9e9_plus_peak_78	chr1	1375584	1375783	+	200	3	1	7	2	1	3	1	0	2	1	2	2
macs2_2.9e9_plus_peak_79	chr1	1375883	1376290	+	408	46	36	29	38	21	22	20	21	40	33	41	27
macs2_2.9e9_plus_peak_80	chr1	1378152	1378358	+	207	7	2	2	3	2	3	2	2	6	12	13	8
macs2_2.9e9_plus_peak_81	chr1	1391667	1391891	+	225	0	0	0	0	0	0	0	0	0	0	0	0
macs2_2.9e9_plus_peak_82	chr1	1404387	1404779	+	393	0	6	1	3	3	0	2	0	12	9	6	7
macs2_2.9e9_plus_peak_83	chr1	1407369	1407610	+	242	3	1	4	1	2	3	1	0	5	0	1	0
macs2_2.9e9_plus_peak_84	chr1	1413006	1413224	+	219	4	4	2	0	1	2	4	5	9	4	0	6
macs2_2.9e9_plus_peak_85	chr1	1413338	1413567	+	230	3	4	2	8	1	6	5	4	7	4	6	5
macs2_2.9e9_plus_peak_86	chr1	1418378	1418655	+	278	13	18	20	33	18	19	30	25	31	16	22	18
macs2_2.9e9_plus_peak_87	chr1	1418738	1418953	+	216	5	4	1	3	1	3	2	7	5	3	10	2
macs2_2.9e9_plus_peak_88	chr1	1428171	1428400	+	230	6	6	2	3	4	6	4	5	8	8	3	4
macs2_2.9e9_plus_peak_89	chr1	1430985	1431728	+	744	290	160	371	228	147	256	205	239	347	267	325	277
macs2_2.9e9_plus_peak_90	chr1	1444776	1444975	+	200	0	0	0	0	0	0	0	0	0	0	0	0
macs2_2.9e9_plus_peak_91	chr1	1445373	1445574	+	202	0	0	0	0	2	1	1	0	2	3	3	0
macs2_2.9e9_plus_peak_92	chr1	1450213	1450658	+	446	5	2	5	2	1	5	2	6	8	4	3	5
macs2_2.9e9_plus_peak_93	chr1	1451713	1451913	+	201	4	1	1	6	2	1	0	2	2	2	2	2
macs2_2.9e9_plus_peak_94	chr1	1456432	1456844	+	413	15	26	11	14	8	14	11	15	21	11	12	11
macs2_2.9e9_plus_peak_95	chr1	1457388	1457603	+	216	13	8	8	10	2	7	6	1	4	2	4	6
macs2_2.9e9_plus_peak_96	chr1	1465642	1465847	+	206	7	4	8	13	6	10	7	6	4	6	7	12
macs2_2.9e9_plus_peak_97	chr1	1469575	1470222	+	648	697	520	558	502	288	516	378	432	665	553	532	485
macs2_2.9e9_plus_peak_98	chr1	1510793	1511152	+	360	12	16	20	35	11	19	10	9	24	11	19	12
macs2_2.9e9_plus_peak_99	chr1	1512069	1512536	+	468	18	11	22	20	13	11	9	16	15	14	11	7
macs2_2.9e9_plus_peak_100	chr1	1523299	1523647	+	349	5	3	5	6	2	3	1	6	5	2	5	5
macs2_2.9e9_plus_peak_101	chr1	1537979	1538330	+	352	10	7	20	24	8	9	15	17	31	23	24	23
macs2_2.9e9_plus_peak_102	chr1	1543873	1544275	+	403	2	5	6	3	3	2	1	0	6	6	4	6
macs2_2.9e9_plus_peak_103	chr1	1551970	1552843	+	874	90	82	85	87	25	38	34	54	126	108	91	110
macs2_2.9e9_plus_peak_104	chr1	1564937	1565142	+	206	4	3	2	0	0	2	0	1	7	6	0	2
macs2_2.9e9_plus_peak_105	chr1	1565769	1566132	+	364	45	23	22	17	10	20	20	14	49	46	62	37
macs2_2.9e9_plus_peak_106	chr1	1593886	1594186	+	301	2	7	1	1	0	3	0	3	3	6	0	3
macs2_2.9e9_plus_peak_107	chr1	1613394	1613633	+	240	29	35	31	22	5	28	16	17	26	31	21	18
macs2_2.9e9_plus_peak_108	chr1	1625324	1625910	+	587	33	31	69	85	32	47	27	35	71	51	48	45
macs2_2.9e9_plus_peak_109	chr1	1626026	1626246	+	221	7	9	5	8	3	0	1	2	4	3	4	6
macs2_2.9e9_plus_peak_110	chr1	1633098	1633390	+	293	0	0	0	0	0	0	0	0	0	1	1	0
macs2_2.9e9_plus_peak_111	chr1	1656144	1656343	+	200	0	0	1	0	0	0	0	0	0	3	0	0
macs2_2.9e9_plus_peak_112	chr1	1659796	1660088	+	293	7	4	1	5	1	0	2	2	2	3	5	1
macs2_2.9e9_plus_peak_113	chr1	1678494	1678777	+	284	0	0	1	1	0	0	0	0	1	0	0	0
macs2_2.9e9_plus_peak_114	chr1	1679852	1680195	+	344	8	2	3	1	2	5	4	3	3	4	3	3
macs2_2.9e9_plus_peak_115	chr1	1718196	1718461	+	266	0	3	1	1	1	1	1	0	1	0	4	1
macs2_2.9e9_plus_peak_116	chr1	1763221	1763587	+	367	3	0	2	3	2	1	0	2	2	0	2	0
macs2_2.9e9_plus_peak_117	chr1	1791170	1791403	+	234	0	2	7	1	1	5	0	0	1	1	4	2
macs2_2.9e9_plus_peak_118	chr1	1823720	1824299	+	580	19	15	17	19	5	13	8	9	24	16	23	23
macs2_2.9e9_plus_peak_119	chr1	1841036	1841235	+	200	2	1	0	0	0	1	1	1	0	0	0	2
macs2_2.9e9_plus_peak_120	chr1	1841746	1841981	+	236	0	5	0	1	0	0	0	0	0	2	2	2
macs2_2.9e9_plus_peak_121	chr1	1845206	1845430	+	225	2	1	0	0	0	0	3	3	3	4	3	3
macs2_2.9e9_plus_peak_122	chr1	1883698	1884045	+	348	1	3	1	1	3	1	0	2	4	3	3	3
macs2_2.9e9_plus_peak_123	chr1	1890558	1890807	+	250	6	2	0	1	1	1	2	1	3	7	8	6
macs2_2.9e9_plus_peak_124	chr1	1928312	1928511	+	200	1	0	2	0	2	1	1	0	0	0	1	0
macs2_2.9e9_plus_peak_125	chr1	1943803	1944002	+	200	0	0	0	0	0	0	0	0	0	0	0	2
macs2_2.9e9_plus_peak_126	chr1	1958138	1958341	+	204	4	1	1	4	3	0	2	1	4	4	8	6
macs2_2.9e9_plus_peak_127	chr1	1961969	1962335	+	367	58	50	64	83	46	55	45	63	207	150	145	106
macs2_2.9e9_plus_peak_128	chr1	1978206	1978428	+	223	2	3	0	2	0	2	1	0	5	2	10	9
macs2_2.9e9_plus_peak_129	chr1	1984133	1984372	+	240	4	4	5	2	1	2	0	0	2	0	0	1
macs2_2.9e9_plus_peak_130	chr1	1985778	1986160	+	383	6	5	16	18	10	12	14	5	14	9	11	17
macs2_2.9e9_plus_peak_131	chr1	1994649	1994907	+	259	1	0	0	2	0	2	0	0	1	6	3	3
macs2_2.9e9_plus_peak_132	chr1	1996964	1997235	+	272	3	3	4	8	4	4	3	5	13	11	6	4
macs2_2.9e9_plus_peak_133	chr1	2000740	2001096	+	357	1	0	4	0	5	9	7	6	151	160	125	96
macs2_2.9e9_plus_peak_134	chr1	2002853	2003107	+	255	1	2	0	1	1	8	2	2	22	13	13	20
macs2_2.9e9_plus_peak_135	chr1	2008090	2008303	+	214	4	0	0	6	1	2	2	0	2	2	2	3
macs2_2.9e9_plus_peak_136	chr1	2016302	2016558	+	257	1	3	5	2	2	2	3	0	4	4	1	1
macs2_2.9e9_plus_peak_137	chr1	2018393	2018683	+	291	12	17	18	16	8	7	11	14	30	19	17	12
macs2_2.9e9_plus_peak_138	chr1	2021236	2021467	+	232	1	2	6	1	1	2	3	0	2	4	1	2
macs2_2.9e9_plus_peak_139	chr1	2032144	2032603	+	460	42	35	41	54	23	23	24	36	67	59	76	33
macs2_2.9e9_plus_peak_140	chr1	2040778	2041046	+	269	1	0	0	1	0	2	0	0	11	13	12	6
macs2_2.9e9_plus_peak_141	chr1	2043958	2044171	+	214	0	1	3	2	1	2	1	2	3	4	2	3
macs2_2.9e9_plus_peak_142	chr1	2045659	2045865	+	207	1	1	0	2	1	1	0	2	2	6	3	4
macs2_2.9e9_plus_peak_143	chr1	2056494	2056759	+	266	3	6	9	11	4	3	9	5	7	5	8	5
macs2_2.9e9_plus_peak_144	chr1	2063179	2063399	+	221	5	0	0	4	0	3	0	1	3	3	2	4
macs2_2.9e9_plus_peak_145	chr1	2070307	2070522	+	216	3	1	0	2	1	4	1	0	2	0	5	1
macs2_2.9e9_plus_peak_146	chr1	2071960	2072203	+	244	5	6	1	5	4	3	4	1	3	5	3	4
macs2_2.9e9_plus_peak_147	chr1	2081177	2081376	+	200	0	0	1	0	0	2	2	0	0	0	1	0
macs2_2.9e9_plus_peak_148	chr1	2081509	2081725	+	217	0	2	3	1	1	1	0	1	4	0	1	0
macs2_2.9e9_plus_peak_149	chr1	2087786	2088019	+	234	1	0	3	1	3	0	1	3	0	0	0	0
macs2_2.9e9_plus_peak_150	chr1	2095202	2095407	+	206	1	2	1	0	0	0	0	0	1	0	0	0
macs2_2.9e9_plus_peak_151	chr1	2107743	2108132	+	390	15	21	12	19	4	13	15	9	7	5	7	7
macs2_2.9e9_plus_peak_152	chr1	2114576	2114778	+	203	6	2	6	6	5	2	2	4	2	1	6	2
macs2_2.9e9_plus_peak_153	chr1	2116398	2116968	+	571	254	203	176	175	89	122	126	125	122	88	116	101
macs2_2.9e9_plus_peak_154	chr1	2123756	2124174	+	419	2	1	0	3	0	1	0	0	3	3	3	2
macs2_2.9e9_plus_peak_155	chr1	2124493	2124805	+	313	1	0	1	2	3	2	0	0	5	3	5	6
macs2_2.9e9_plus_peak_156	chr1	2131655	2131968	+	314	5	7	6	4	3	2	1	0	4	4	4	8
macs2_2.9e9_plus_peak_157	chr1	2133363	2133572	+	210	3	2	1	1	1	0	3	1	5	1	1	2
macs2_2.9e9_plus_peak_158	chr1	2138163	2138373	+	211	3	0	0	1	1	1	0	1	5	3	1	3
macs2_2.9e9_plus_peak_159	chr1	2140153	2140394	+	242	1	3	3	0	0	1	1	1	2	2	1	2
macs2_2.9e9_plus_peak_160	chr1	2148936	2149135	+	200	1	0	0	3	1	2	1	0	4	4	3	0
macs2_2.9e9_plus_peak_161	chr1	2151670	2152294	+	625	10	6	6	5	6	11	3	5	8	7	15	11
macs2_2.9e9_plus_peak_162	chr1	2161933	2162330	+	398	8	3	7	12	8	8	4	4	31	23	29	13
macs2_2.9e9_plus_peak_163	chr1	2167680	2167925	+	246	1	1	0	3	0	1	0	0	3	2	1	5
macs2_2.9e9_plus_peak_164	chr1	2170386	2170609	+	224	3	0	1	0	0	3	0	0	3	2	5	3
macs2_2.9e9_plus_peak_165	chr1	2176114	2176325	+	212	2	1	4	5	4	2	5	2	11	8	6	5
macs2_2.9e9_plus_peak_166	chr1	2178579	2178778	+	200	0	1	4	2	2	2	0	3	4	1	0	1
macs2_2.9e9_plus_peak_167	chr1	2181244	2181495	+	252	1	6	2	2	4	7	6	7	9	9	2	6
macs2_2.9e9_plus_peak_168	chr1	2184426	2184676	+	251	4	4	4	6	1	8	7	6	15	9	9	7
macs2_2.9e9_plus_peak_169	chr1	2189036	2189292	+	257	5	2	3	3	0	1	0	2	6	7	0	5
macs2_2.9e9_plus_peak_170	chr1	2195207	2195578	+	372	5	1	2	2	1	1	6	4	7	10	11	2
macs2_2.9e9_plus_peak_171	chr1	2196135	2196364	+	230	9	6	3	2	3	1	3	4	7	9	2	8
macs2_2.9e9_plus_peak_172	chr1	2203958	2204232	+	275	0	2	0	1	0	0	2	1	5	9	5	3
macs2_2.9e9_plus_peak_173	chr1	2205585	2205802	+	218	0	0	0	0	0	2	2	0	9	5	3	5
macs2_2.9e9_plus_peak_174	chr1	2211471	2211926	+	456	6	12	9	8	10	16	4	8	20	12	10	10
macs2_2.9e9_plus_peak_175	chr1	2227301	2227813	+	513	16	20	6	12	8	18	11	20	63	39	39	28
macs2_2.9e9_plus_peak_176	chr1	2235936	2236172	+	237	29	15	24	15	18	21	27	11	21	32	28	18
macs2_2.9e9_plus_peak_177	chr1	2239170	2239440	+	271	12	9	3	14	8	7	7	4	11	11	10	8
macs2_2.9e9_plus_peak_178	chr1	2239705	2240190	+	486	176	135	170	128	52	155	172	168	126	96	64	107
macs2_2.9e9_plus_peak_179	chr1	2240815	2241105	+	291	31	21	29	26	31	29	34	29	57	39	69	36
macs2_2.9e9_plus_peak_180	chr1	2241354	2241759	+	406	447	480	296	367	239	302	259	300	457	434	476	390
macs2_2.9e9_plus_peak_181	chr1	2250510	2250779	+	270	6	4	1	1	3	4	0	0	2	2	2	0
macs2_2.9e9_plus_peak_182	chr1	2253387	2253750	+	364	2	4	0	1	1	1	0	0	1	0	1	0
macs2_2.9e9_plus_peak_183	chr1	2323761	2324071	+	311	9	18	32	14	7	13	7	18	17	10	8	15
macs2_2.9e9_plus_peak_184	chr1	2327770	2328100	+	331	13	3	6	11	6	4	8	13	10	2	1	4
macs2_2.9e9_plus_peak_185	chr1	2333698	2333923	+	226	34	17	42	34	21	18	17	23	24	31	21	17
macs2_2.9e9_plus_peak_186	chr1	2334488	2334854	+	367	129	122	194	196	129	182	146	185	198	157	174	154
macs2_2.9e9_plus_peak_187	chr1	2334985	2335335	+	351	339	278	338	290	115	299	214	228	267	317	51	258
macs2_2.9e9_plus_peak_188	chr1	2336516	2336989	+	474	55	61	44	49	11	43	19	35	37	42	41	46
macs2_2.9e9_plus_peak_189	chr1	2478706	2479033	+	328	90	80	319	238	140	144	224	258	400	272	235	161
macs2_2.9e9_plus_peak_190	chr1	2495065	2495382	+	318	4	4	1	2	0	2	0	4	6	11	9	10
macs2_2.9e9_plus_peak_191	chr1	2522580	2523045	+	466	73	38	30	37	15	33	34	20	42	47	59	42
macs2_2.9e9_plus_peak_192	chr1	2985751	2985992	+	242	4	3	0	2	0	1	1	0	1	1	0	2
macs2_2.9e9_plus_peak_193	chr1	2989898	2990099	+	202	1	0	0	2	2	0	0	1	3	6	1	1
macs2_2.9e9_plus_peak_194	chr1	2991802	2992001	+	200	0	0	0	1	1	2	1	0	2	8	0	0
macs2_2.9e9_plus_peak_195	chr1	2996583	2996782	+	200	0	0	0	1	0	0	1	0	2	0	3	2
macs2_2.9e9_plus_peak_196	chr1	3003250	3003675	+	426	10	10	6	3	1	4	2	6	7	6	5	3
macs2_2.9e9_plus_peak_197	chr1	3004770	3004972	+	203	2	0	0	3	2	0	1	1	2	1	1	0
macs2_2.9e9_plus_peak_198	chr1	3020228	3020552	+	325	3	5	1	0	0	5	0	0	2	5	1	2
macs2_2.9e9_plus_peak_199	chr1	3025274	3025602	+	329	9	6	4	5	1	1	4	2	8	7	6	10
macs2_2.9e9_plus_peak_200	chr1	3028578	3028787	+	210	0	1	0	1	0	2	2	0	0	5	2	1
macs2_2.9e9_plus_peak_201	chr1	3040704	3040942	+	239	2	2	4	0	0	0	0	0	1	7	1	2
macs2_2.9e9_plus_peak_202	chr1	3043417	3043747	+	331	2	0	0	6	1	3	0	2	13	1	5	2
macs2_2.9e9_plus_peak_203	chr1	3047904	3048125	+	222	4	0	1	3	1	2	1	0	4	1	5	2
macs2_2.9e9_plus_peak_204	chr1	3057934	3058138	+	205	0	0	0	0	0	0	0	0	1	3	6	2
macs2_2.9e9_plus_peak_205	chr1	3073842	3074231	+	390	16	8	8	8	4	12	4	8	6	9	8	5
macs2_2.9e9_plus_peak_206	chr1	3086068	3086344	+	277	4	1	5	5	1	2	2	7	2	2	3	1
macs2_2.9e9_plus_peak_207	chr1	3086508	3086707	+	200	0	1	0	0	0	2	0	1	0	2	0	1
macs2_2.9e9_plus_peak_208	chr1	3106068	3106566	+	499	1	0	4	1	3	2	0	2	1	2	3	0
macs2_2.9e9_plus_peak_209	chr1	3111848	3112211	+	364	2	0	5	1	1	2	3	4	0	3	0	0
macs2_2.9e9_plus_peak_210	chr1	3121884	3122125	+	242	4	9	4	3	3	4	8	5	0	0	2	1
macs2_2.9e9_plus_peak_211	chr1	3125119	3125341	+	223	3	4	1	5	3	2	6	2	0	0	1	1
macs2_2.9e9_plus_peak_212	chr1	3125608	3125818	+	211	0	3	4	3	2	5	1	0	2	0	1	2
macs2_2.9e9_plus_peak_213	chr1	3146976	3147253	+	278	2	3	0	2	1	1	2	1	1	0	2	2
macs2_2.9e9_plus_peak_214	chr1	3150314	3150542	+	229	4	2	0	6	5	1	0	3	0	0	3	2
macs2_2.9e9_plus_peak_215	chr1	3156225	3156695	+	471	0	4	5	6	0	1	1	0	0	1	0	1
macs2_2.9e9_plus_peak_216	chr1	3156834	3157084	+	251	5	3	3	5	1	1	3	5	0	0	1	2
macs2_2.9e9_plus_peak_217	chr1	3165813	3166236	+	424	57	66	35	70	23	27	23	26	14	12	11	20
macs2_2.9e9_plus_peak_218	chr1	3177329	3177831	+	503	25	14	13	15	8	12	3	7	4	6	5	6
macs2_2.9e9_plus_peak_219	chr1	3190157	3190696	+	540	65	81	39	84	29	40	22	40	20	20	17	21
macs2_2.9e9_plus_peak_220	chr1	3196449	3196676	+	228	5	3	2	6	3	4	3	0	1	0	0	0
macs2_2.9e9_plus_peak_221	chr1	3202264	3202597	+	334	5	4	1	4	3	2	2	3	0	2	0	0
macs2_2.9e9_plus_peak_222	chr1	3217652	3218023	+	372	11	12	16	12	3	13	8	8	2	2	6	4
macs2_2.9e9_plus_peak_223	chr1	3218903	3219213	+	311	8	7	3	5	4	2	3	2	1	1	3	1
macs2_2.9e9_plus_peak_224	chr1	3254180	3254654	+	475	2	7	2	3	4	6	3	0	0	1	3	4
macs2_2.9e9_plus_peak_225	chr1	3266756	3267015	+	260	1	5	3	2	1	1	1	2	0	1	2	0
macs2_2.9e9_plus_peak_226	chr1	3275503	3275703	+	201	0	3	0	2	2	2	0	0	0	2	0	0
macs2_2.9e9_plus_peak_227	chr1	3285519	3285720	+	202	1	0	2	0	2	2	1	2	0	1	0	1
macs2_2.9e9_plus_peak_228	chr1	3303272	3303602	+	331	1	2	3	2	1	3	2	0	1	0	1	1
macs2_2.9e9_plus_peak_229	chr1	3322970	3323417	+	448	17	5	13	17	7	2	2	8	4	1	8	8
macs2_2.9e9_plus_peak_230	chr1	3350705	3351021	+	317	21	12	21	36	6	12	7	13	4	10	1	11
macs2_2.9e9_plus_peak_231	chr1	3351727	3352242	+	516	22	24	15	31	5	18	1	4	5	3	4	11
macs2_2.9e9_plus_peak_232	chr1	3352593	3352831	+	239	5	11	9	9	5	1	1	4	2	4	1	3
macs2_2.9e9_plus_peak_233	chr1	3355077	3355278	+	202	10	3	9	6	1	0	1	0	0	0	0	0
macs2_2.9e9_plus_peak_234	chr1	3375472	3375671	+	200	0	1	1	1	0	0	0	0	2	1	1	2
macs2_2.9e9_plus_peak_235	chr1	3397231	3397825	+	595	11	14	22	36	11	33	22	35	61	48	39	26
macs2_2.9e9_plus_peak_236	chr1	3545316	3545515	+	200	3	0	4	0	1	2	0	2	1	0	1	3
macs2_2.9e9_plus_peak_237	chr1	3546313	3546833	+	521	205	191	58	93	73	97	34	48	77	79	112	79
macs2_2.9e9_plus_peak_238	chr1	3570242	3570472	+	231	3	0	0	5	1	3	0	2	5	5	2	7
macs2_2.9e9_plus_peak_239	chr1	3572638	3572967	+	330	2	2	7	7	4	0	2	2	7	6	5	4
macs2_2.9e9_plus_peak_240	chr1	3575471	3575882	+	412	22	29	18	28	16	20	14	12	39	39	36	53
macs2_2.9e9_plus_peak_241	chr1	3580148	3580383	+	236	2	5	3	5	3	4	6	3	11	5	5	8
macs2_2.9e9_plus_peak_242	chr1	3582577	3582794	+	218	1	2	2	6	2	4	2	0	4	1	5	1
macs2_2.9e9_plus_peak_243	chr1	3584146	3584443	+	298	4	3	4	8	3	3	1	3	7	6	3	5
macs2_2.9e9_plus_peak_244	chr1	3587091	3587358	+	268	7	3	5	5	3	3	4	5	10	3	2	8
macs2_2.9e9_plus_peak_245	chr1	3616816	3617033	+	218	0	0	0	0	0	1	0	0	7	2	3	3
macs2_2.9e9_plus_peak_246	chr1	3628544	3628894	+	351	1	3	0	1	5	3	1	1	7	5	2	10
macs2_2.9e9_plus_peak_247	chr1	3633442	3633695	+	254	2	3	0	2	0	1	4	0	8	0	0	3
macs2_2.9e9_plus_peak_248	chr1	3650081	3650588	+	508	33	25	30	31	16	27	15	19	16	8	14	16
macs2_2.9e9_plus_peak_249	chr1	3652571	3652905	+	335	42	39	41	26	25	32	9	18	31	31	38	26
macs2_2.9e9_plus_peak_250	chr1	3691958	3692186	+	229	3	4	8	6	2	6	5	6	4	6	1	2
macs2_2.9e9_plus_peak_251	chr1	3692377	3692652	+	276	29	26	13	32	9	12	14	13	43	27	24	22
macs2_2.9e9_plus_peak_252	chr1	3715705	3716212	+	508	5	1	2	7	2	1	1	1	0	1	4	0
macs2_2.9e9_plus_peak_253	chr1	3775976	3776265	+	290	17	9	4	20	7	9	16	10	23	7	16	11
macs2_2.9e9_plus_peak_254	chr1	3778310	3778575	+	266	29	50	24	33	10	15	14	9	15	8	21	20
macs2_2.9e9_plus_peak_255	chr1	3780829	3781219	+	391	5	5	5	9	4	6	2	5	6	6	3	8
macs2_2.9e9_plus_peak_256	chr1	3786219	3786513	+	295	4	3	3	0	1	2	3	3	1	3	1	4
macs2_2.9e9_plus_peak_257	chr1	3789041	3789275	+	235	3	1	1	2	2	2	4	4	4	4	1	6
macs2_2.9e9_plus_peak_258	chr1	3793022	3793255	+	234	5	2	1	4	0	0	1	0	0	0	1	1
macs2_2.9e9_plus_peak_259	chr1	3801696	3802113	+	418	421	443	269	401	153	223	147	250	270	318	127	329
macs2_2.9e9_plus_peak_260	chr1	3832509	3832708	+	200	0	3	0	0	0	1	0	0	3	2	0	1
macs2_2.9e9_plus_peak_261	chr1	4568606	4568811	+	206	4	1	0	2	1	2	0	2	1	2	3	1
macs2_2.9e9_plus_peak_262	chr1	5901645	5901844	+	200	2	0	1	1	0	1	0	2	1	0	1	0
macs2_2.9e9_plus_peak_263	chr1	6060435	6060865	+	431	7	7	7	6	4	4	4	5	10	19	12	9
macs2_2.9e9_plus_peak_264	chr1	6068599	6068807	+	209	0	3	2	3	1	0	0	0	1	1	2	0
macs2_2.9e9_plus_peak_265	chr1	6070395	6070611	+	217	1	6	1	1	4	1	0	1	2	6	3	0
macs2_2.9e9_plus_peak_266	chr1	6078790	6079131	+	342	8	7	7	7	1	6	3	1	6	12	3	6
macs2_2.9e9_plus_peak_267	chr1	6092566	6092941	+	376	2	3	3	1	0	0	2	1	3	1	0	6
macs2_2.9e9_plus_peak_268	chr1	6101796	6102020	+	225	0	0	5	1	2	3	2	2	1	1	1	0
macs2_2.9e9_plus_peak_269	chr1	6112385	6112607	+	223	11	0	8	2	2	3	1	5	3	1	0	1
macs2_2.9e9_plus_peak_270	chr1	6113865	6114197	+	333	2	5	1	2	4	2	1	0	0	1	1	1
macs2_2.9e9_plus_peak_271	chr1	6134911	6135126	+	216	0	3	1	2	0	1	1	1	0	1	0	0
macs2_2.9e9_plus_peak_272	chr1	6137143	6137427	+	285	2	7	1	5	0	1	1	0	5	1	0	0
macs2_2.9e9_plus_peak_273	chr1	6146321	6146528	+	208	2	1	4	0	0	0	0	3	2	0	1	0
macs2_2.9e9_plus_peak_274	chr1	6160920	6161385	+	466	23	41	10	16	3	4	7	7	8	4	11	10
macs2_2.9e9_plus_peak_275	chr1	6251445	6251647	+	203	0	0	1	0	0	0	0	0	0	0	0	1
macs2_2.9e9_plus_peak_276	chr1	6259857	6260056	+	200	0	2	1	0	0	2	0	1	0	2	2	0
macs2_2.9e9_plus_peak_277	chr1	6268130	6268504	+	375	4	1	3	6	3	7	0	1	11	5	5	2
macs2_2.9e9_plus_peak_278	chr1	6273333	6273679	+	347	3	2	4	8	1	2	1	2	0	0	2	3
macs2_2.9e9_plus_peak_279	chr1	6280580	6280994	+	415	29	22	21	20	8	20	12	18	28	34	22	27
macs2_2.9e9_plus_peak_280	chr1	6281131	6281447	+	317	7	7	3	5	2	3	0	4	0	8	7	0
macs2_2.9e9_plus_peak_281	chr1	6296513	6296724	+	212	1	0	2	2	9	2	2	6	0	0	8	6
macs2_2.9e9_plus_peak_282	chr1	6298320	6298609	+	290	11	9	9	12	7	10	9	8	17	10	7	6
macs2_2.9e9_plus_peak_283	chr1	6299209	6299629	+	421	6	9	8	7	3	8	4	3	18	21	11	9
macs2_2.9e9_plus_peak_284	chr1	6306539	6306738	+	200	2	0	1	0	0	2	0	3	3	0	1	1
macs2_2.9e9_plus_peak_285	chr1	6454096	6454574	+	479	5	3	5	9	1	5	2	4	15	8	3	5
macs2_2.9e9_plus_peak_286	chr1	6461401	6461603	+	203	0	1	2	1	0	1	0	0	3	2	0	1
macs2_2.9e9_plus_peak_287	chr1	6482675	6482885	+	211	0	0	0	1	0	1	6	3	0	0	2	0
macs2_2.9e9_plus_peak_288	chr1	6502134	6502550	+	417	1	0	2	2	1	0	2	0	4	5	3	2
macs2_2.9e9_plus_peak_289	chr1	6516444	6516865	+	422	4	4	1	2	0	2	1	2	2	5	4	4
macs2_2.9e9_plus_peak_290	chr1	6577330	6577533	+	204	0	0	0	0	0	0	0	0	0	0	0	0
macs2_2.9e9_plus_peak_291	chr1	6639697	6639939	+	243	12	7	3	6	1	2	0	7	6	5	7	4
macs2_2.9e9_plus_peak_292	chr1	6641535	6641829	+	295	6	6	6	6	2	3	0	2	8	1	2	1
macs2_2.9e9_plus_peak_293	chr1	6648852	6649459	+	608	42	32	38	20	10	23	8	15	36	33	25	28
macs2_2.9e9_plus_peak_294	chr1	6656366	6656583	+	218	0	1	0	0	3	2	2	2	3	0	1	0
macs2_2.9e9_plus_peak_295	chr1	6680001	6680378	+	378	17	14	9	15	13	8	8	7	12	17	20	13
macs2_2.9e9_plus_peak_296	chr1	6681989	6682213	+	225	6	12	9	10	5	8	10	6	7	4	4	7
macs2_2.9e9_plus_peak_297	chr1	6683405	6684180	+	776	603	567	302	302	193	240	228	242	389	355	400	353
macs2_2.9e9_plus_peak_298	chr1	6691833	6692270	+	438	14	3	13	7	5	8	7	7	8	2	7	8
macs2_2.9e9_plus_peak_299	chr1	6693200	6693764	+	565	451	305	393	362	215	286	216	238	427	360	405	395
macs2_2.9e9_plus_peak_300	chr1	6695505	6695739	+	235	1	5	3	5	2	4	2	1	1	9	6	6
macs2_2.9e9_plus_peak_301	chr1	6700004	6700212	+	209	1	4	0	3	0	2	0	1	2	4	1	2
macs2_2.9e9_plus_peak_302	chr1	6845534	6845819	+	286	65	44	48	47	9	28	24	21	22	24	8	11
macs2_2.9e9_plus_peak_303	chr1	6853827	6854444	+	618	27	24	21	22	11	15	17	10	11	12	18	12
macs2_2.9e9_plus_peak_304	chr1	6861452	6861972	+	521	18	11	13	19	6	5	7	8	14	15	5	8
macs2_2.9e9_plus_peak_305	chr1	6869850	6870107	+	258	8	12	4	6	3	7	3	3	2	4	4	2
macs2_2.9e9_plus_peak_306	chr1	6877772	6878067	+	296	10	16	6	26	9	5	3	9	10	6	6	9
macs2_2.9e9_plus_peak_307	chr1	6880257	6880497	+	241	55	34	39	38	16	31	18	17	17	22	6	17
macs2_2.9e9_plus_peak_308	chr1	6885159	6885454	+	296	178	95	113	67	32	52	48	52	31	24	10	44
macs2_2.9e9_plus_peak_309	chr1	6886887	6887120	+	234	6	9	3	3	1	5	2	3	10	5	4	5
macs2_2.9e9_plus_peak_310	chr1	6895351	6895598	+	248	13	8	7	15	5	2	3	11	11	14	20	13
macs2_2.9e9_plus_peak_311	chr1	6896178	6896414	+	237	6	7	7	4	2	1	5	4	14	8	9	6
macs2_2.9e9_plus_peak_312	chr1	6896660	6896897	+	238	4	5	4	9	2	2	5	4	9	6	6	9
macs2_2.9e9_plus_peak_313	chr1	6899562	6899976	+	415	19	21	21	24	18	21	19	15	45	26	43	31
macs2_2.9e9_plus_peak_314	chr1	6900521	6900833	+	313	14	16	17	16	10	4	11	17	35	19	30	16
macs2_2.9e9_plus_peak_315	chr1	6901557	6901773	+	217	5	8	8	4	5	2	4	3	3	13	5	8
macs2_2.9e9_plus_peak_316	chr1	6904485	6904881	+	397	41	37	46	42	21	35	19	28	85	53	60	60
macs2_2.9e9_plus_peak_317	chr1	6909234	6909805	+	572	37	39	38	36	14	20	12	12	52	50	44	49
macs2_2.9e9_plus_peak_318	chr1	6910012	6910761	+	750	17	30	18	27	8	17	12	15	52	26	39	33
macs2_2.9e9_plus_peak_319	chr1	6911982	6912209	+	228	10	7	8	6	6	5	4	8	17	13	9	9
macs2_2.9e9_plus_peak_320	chr1	6917310	6917547	+	238	19	6	19	23	9	3	5	9	30	25	26	17
macs2_2.9e9_plus_peak_321	chr1	6917636	6918033	+	398	22	25	32	29	11	17	11	16	58	36	52	28
macs2_2.9e9_plus_peak_322	chr1	6918202	6918506	+	305	0	1	0	0	0	1	0	3	51	44	31	32
macs2_2.9e9_plus_peak_323	chr1	6919675	6919958	+	284	16	19	26	21	12	18	12	15	29	15	26	24
macs2_2.9e9_plus_peak_324	chr1	6925706	6925909	+	204	2	1	2	1	0	2	0	2	5	0	1	1
macs2_2.9e9_plus_peak_325	chr1	6926577	6926826	+	250	5	4	6	6	0	3	0	0	4	3	1	3
macs2_2.9e9_plus_peak_326	chr1	6931812	6932232	+	421	603	477	419	382	192	258	205	283	233	153	135	218
macs2_2.9e9_plus_peak_327	chr1	6938504	6938760	+	257	7	4	5	4	2	6	3	6	5	4	5	2
macs2_2.9e9_plus_peak_328	chr1	6940765	6941100	+	336	7	12	7	9	9	2	3	2	5	1	3	3
macs2_2.9e9_plus_peak_329	chr1	6941935	6942134	+	200	6	0	3	2	0	1	2	1	1	3	6	7
macs2_2.9e9_plus_peak_330	chr1	6947761	6948392	+	632	82	75	74	87	40	54	50	45	55	46	34	49
macs2_2.9e9_plus_peak_331	chr1	6952855	6953456	+	602	29	21	5	23	7	5	6	6	3	9	15	12
macs2_2.9e9_plus_peak_332	chr1	6961999	6962251	+	253	1	4	2	8	1	2	3	0	1	0	1	0
macs2_2.9e9_plus_peak_333	chr1	6962638	6962868	+	231	4	2	3	3	2	0	2	1	1	0	0	0
macs2_2.9e9_plus_peak_334	chr1	6991268	6991467	+	200	4	1	2	2	0	0	0	0	0	0	0	0
macs2_2.9e9_plus_peak_335	chr1	7003795	7004009	+	215	2	1	3	1	0	2	3	0	0	0	1	0
macs2_2.9e9_plus_peak_336	chr1	7012252	7012643	+	392	2	2	2	2	1	0	0	1	6	0	1	1
macs2_2.9e9_plus_peak_337	chr1	7012802	7013065	+	264	2	4	1	3	1	0	2	0	0	0	1	0
macs2_2.9e9_plus_peak_338	chr1	7025550	7025749	+	200	1	0	2	2	0	0	3	1	0	1	1	0
macs2_2.9e9_plus_peak_339	chr1	7031694	7031904	+	211	6	8	6	6	1	3	2	4	2	0	0	0
macs2_2.9e9_plus_peak_340	chr1	7056493	7056895	+	403	8	8	11	10	1	2	2	0	0	2	0	0
macs2_2.9e9_plus_peak_341	chr1	7066164	7066393	+	230	2	1	4	5	2	0	1	1	0	0	0	0
macs2_2.9e9_plus_peak_342	chr1	7066884	7067150	+	267	3	4	2	1	0	0	0	2	3	0	1	2
macs2_2.9e9_plus_peak_343	chr1	7084012	7084213	+	202	4	4	3	3	0	2	4	2	1	1	0	3
macs2_2.9e9_plus_peak_344	chr1	7087073	7087350	+	278	8	6	8	7	0	0	1	0	2	0	0	0
macs2_2.9e9_plus_peak_345	chr1	7089457	7089666	+	210	2	4	5	2	1	0	0	1	1	1	0	0
macs2_2.9e9_plus_peak_346	chr1	7096177	7096376	+	200	1	0	0	6	1	0	0	0	0	0	3	0
macs2_2.9e9_plus_peak_347	chr1	7125340	7125612	+	273	1	2	3	8	0	2	1	0	2	0	0	0
macs2_2.9e9_plus_peak_348	chr1	7157966	7158171	+	206	5	1	9	3	1	1	5	1	1	0	0	1
macs2_2.9e9_plus_peak_349	chr1	7161415	7161714	+	300	2	8	7	1	0	1	1	0	1	0	0	0
macs2_2.9e9_plus_peak_350	chr1	7174231	7174611	+	381	2	1	3	5	1	0	1	0	0	0	0	0
macs2_2.9e9_plus_peak_351	chr1	7216083	7216438	+	356	1	4	5	5	1	1	2	0	0	0	3	0
macs2_2.9e9_plus_peak_352	chr1	7244307	7244637	+	331	12	4	11	2	4	0	1	2	4	0	0	0
macs2_2.9e9_plus_peak_353	chr1	7250217	7250425	+	209	0	4	11	3	0	1	0	0	0	0	0	0
macs2_2.9e9_plus_peak_354	chr1	7279308	7279750	+	443	8	9	19	15	2	3	1	5	0	0	1	1
macs2_2.9e9_plus_peak_355	chr1	7314636	7314842	+	207	6	2	3	5	1	3	3	0	0	0	0	0
macs2_2.9e9_plus_peak_356	chr1	7315208	7315463	+	256	19	12	11	20	0	1	3	5	4	1	1	2
macs2_2.9e9_plus_peak_357	chr1	7332631	7332930	+	300	10	12	4	11	3	3	3	0	1	0	0	0
macs2_2.9e9_plus_peak_358	chr1	7348582	7348786	+	205	2	2	1	3	0	1	0	1	0	1	0	0
macs2_2.9e9_plus_peak_359	chr1	7385655	7386082	+	428	6	1	5	5	0	1	0	1	3	0	1	1
macs2_2.9e9_plus_peak_360	chr1	7386866	7387065	+	200	0	3	1	0	1	0	1	1	0	0	0	0
macs2_2.9e9_plus_peak_361	chr1	7395618	7395936	+	319	9	4	5	9	0	0	1	2	0	2	1	1
macs2_2.9e9_plus_peak_362	chr1	7398579	7398818	+	240	0	0	5	1	0	1	0	0	2	0	0	1
macs2_2.9e9_plus_peak_363	chr1	7430223	7430425	+	203	0	2	2	4	0	2	0	0	1	0	1	0
macs2_2.9e9_plus_peak_364	chr1	7438691	7438907	+	217	1	1	3	3	1	1	1	0	0	0	0	0
macs2_2.9e9_plus_peak_365	chr1	7470489	7470689	+	201	4	1	4	2	0	0	0	0	0	0	0	0
macs2_2.9e9_plus_peak_366	chr1	7506115	7506319	+	205	4	3	1	6	2	0	0	0	0	0	0	0
macs2_2.9e9_plus_peak_367	chr1	7523344	7523696	+	353	1	2	3	3	3	0	0	2	1	0	0	0
macs2_2.9e9_plus_peak_368	chr1	7768435	7768645	+	211	0	1	3	1	1	1	1	2	3	3	4	0
macs2_2.9e9_plus_peak_369	chr1	7768856	7769061	+	206	1	0	1	2	0	0	1	0	2	1	6	1
macs2_2.9e9_plus_peak_370	chr1	7770416	7770783	+	368	5	3	5	7	2	5	2	5	3	1	3	2
macs2_2.9e9_plus_peak_371	chr1	7783163	7783452	+	290	2	6	2	4	2	7	4	1	8	2	1	4
macs2_2.9e9_plus_peak_372	chr1	7783824	7784027	+	204	1	0	0	2	1	1	0	4	1	3	4	3
macs2_2.9e9_plus_peak_373	chr1	7784741	7785013	+	273	3	3	4	3	1	0	0	0	0	0	2	0
macs2_2.9e9_plus_peak_374	chr1	7793169	7793382	+	214	3	3	0	2	2	1	1	1	3	1	0	1
macs2_2.9e9_plus_peak_375	chr1	7794414	7794867	+	454	4	4	9	4	4	5	5	3	4	1	1	7
macs2_2.9e9_plus_peak_376	chr1	7806113	7806312	+	200	3	0	0	0	2	0	0	2	2	0	1	2
macs2_2.9e9_plus_peak_377	chr1	7811234	7811447	+	214	6	2	0	5	1	0	0	2	1	1	2	5
macs2_2.9e9_plus_peak_378	chr1	7815257	7815496	+	240	0	8	4	4	4	2	3	1	6	1	2	1
macs2_2.9e9_plus_peak_379	chr1	7816805	7817014	+	210	8	3	1	2	4	4	3	1	1	3	1	4
macs2_2.9e9_plus_peak_380	chr1	7817680	7817886	+	207	12	6	4	3	2	2	2	0	2	4	1	4
macs2_2.9e9_plus_peak_381	chr1	7818856	7819318	+	463	25	20	16	20	10	11	4	3	15	17	13	14
macs2_2.9e9_plus_peak_382	chr1	7827483	7828343	+	861	208	199	62	97	63	76	53	71	93	81	72	82
macs2_2.9e9_plus_peak_383	chr1	7829504	7829887	+	384	69	94	32	40	17	23	30	29	36	18	25	32
macs2_2.9e9_plus_peak_384	chr1	7837239	7837440	+	202	20	10	19	15	12	11	11	12	7	13	16	14
macs2_2.9e9_plus_peak_385	chr1	7839787	7840122	+	336	16	9	4	4	4	5	5	4	7	3	3	5
macs2_2.9e9_plus_peak_386	chr1	7840205	7840473	+	269	14	9	3	4	3	7	4	3	8	13	8	2
macs2_2.9e9_plus_peak_387	chr1	7841051	7841622	+	572	243	195	141	117	69	124	79	102	170	151	116	138
macs2_2.9e9_plus_peak_388	chr1	7849095	7849294	+	200	0	0	0	1	3	0	0	2	5	0	1	2
macs2_2.9e9_plus_peak_389	chr1	7853391	7853630	+	240	0	0	2	0	0	0	1	3	5	0	2	0
macs2_2.9e9_plus_peak_390	chr1	7855593	7855931	+	339	1	0	0	2	3	0	0	0	0	2	6	1
macs2_2.9e9_plus_peak_391	chr1	7872551	7872787	+	237	2	0	2	0	0	0	0	2	2	1	2	3
macs2_2.9e9_plus_peak_392	chr1	7876112	7876311	+	200	0	0	1	1	0	3	0	3	1	0	1	1
macs2_2.9e9_plus_peak_393	chr1	7877702	7877901	+	200	1	0	1	0	0	3	0	0	0	1	2	3
macs2_2.9e9_plus_peak_394	chr1	7904940	7905338	+	399	2	3	2	3	0	2	1	2	8	7	6	3
macs2_2.9e9_plus_peak_395	chr1	7977829	7978028	+	200	1	1	3	0	1	0	1	0	4	6	1	3
macs2_2.9e9_plus_peak_396	chr1	8017036	8017235	+	200	4	0	4	0	4	3	0	1	0	5	0	3
macs2_2.9e9_plus_peak_397	chr1	8021734	8022198	+	465	39	28	29	21	22	19	17	18	48	23	33	23
macs2_2.9e9_plus_peak_398	chr1	8022861	8023122	+	262	123	84	111	110	84	66	81	81	111	94	145	104
macs2_2.9e9_plus_peak_399	chr1	8025420	8025619	+	200	125	77	114	122	92	72	98	83	129	105	161	112
macs2_2.9e9_plus_peak_400	chr1	8029436	8029658	+	223	19	14	13	16	11	7	8	8	5	8	12	11
macs2_2.9e9_plus_peak_401	chr1	8030970	8031394	+	425	55	27	35	40	13	20	17	21	19	20	21	18
macs2_2.9e9_plus_peak_402	chr1	8034296	8034505	+	210	12	4	8	14	4	10	4	8	15	4	6	5
macs2_2.9e9_plus_peak_403	chr1	8037724	8037981	+	258	71	43	41	41	21	34	17	29	23	41	8	43
macs2_2.9e9_plus_peak_404	chr1	8038777	8039035	+	259	9	16	6	12	2	9	5	6	9	2	6	10
macs2_2.9e9_plus_peak_405	chr1	8044982	8045530	+	549	1798	1443	1341	1359	676	901	735	872	1094	1095	981	1029
macs2_2.9e9_plus_peak_406	chr1	8051186	8051476	+	291	7	5	1	0	5	2	4	2	15	26	19	8
macs2_2.9e9_plus_peak_407	chr1	8063749	8063961	+	213	3	2	2	2	1	1	0	0	2	2	2	2
macs2_2.9e9_plus_peak_408	chr1	8069891	8070143	+	253	1	5	0	3	2	4	0	1	11	19	14	9
macs2_2.9e9_plus_peak_409	chr1	8071584	8071902	+	319	2	2	0	1	0	2	1	1	1	11	1	2
macs2_2.9e9_plus_peak_410	chr1	8079942	8080147	+	206	0	0	0	1	0	3	0	0	2	5	3	4
macs2_2.9e9_plus_peak_411	chr1	8087883	8088127	+	245	3	5	0	3	2	2	2	0	1	0	1	1
macs2_2.9e9_plus_peak_412	chr1	8118857	8119141	+	285	2	2	3	4	1	3	3	2	5	1	8	2
macs2_2.9e9_plus_peak_413	chr1	8303123	8303322	+	200	2	1	1	3	0	0	0	0	1	0	1	1
macs2_2.9e9_plus_peak_414	chr1	8401507	8401706	+	200	2	1	0	2	0	0	0	0	0	1	1	0
macs2_2.9e9_plus_peak_415	chr1	8403948	8404361	+	414	6	6	0	1	0	1	0	1	4	2	4	3
macs2_2.9e9_plus_peak_416	chr1	8429525	8429751	+	227	351	463	738	769	227	679	337	415	896	567	317	491
macs2_2.9e9_plus_peak_417	chr1	8443821	8444079	+	259	0	0	3	0	0	1	0	0	0	0	2	1
macs2_2.9e9_plus_peak_418	chr1	8455257	8455769	+	513	5	1	7	4	7	8	2	5	10	4	5	7
macs2_2.9e9_plus_peak_419	chr1	8667137	8667545	+	409	2	3	8	8	7	10	8	1	28	14	32	21
macs2_2.9e9_plus_peak_420	chr1	8878187	8878499	+	313	5	2	5	3	1	1	1	0	3	1	2	4
macs2_2.9e9_plus_peak_421	chr1	8884148	8884347	+	200	1	1	1	0	1	0	1	1	3	2	1	1
macs2_2.9e9_plus_peak_422	chr1	8938912	8939112	+	201	4	4	3	2	2	4	3	1	6	5	3	7
macs2_2.9e9_plus_peak_423	chr1	8939695	8940262	+	568	47	55	42	61	27	30	22	29	59	68	73	66
macs2_2.9e9_plus_peak_424	chr1	8954253	8954807	+	555	10	5	5	5	0	2	5	3	5	6	9	4
macs2_2.9e9_plus_peak_425	chr1	9038588	9038882	+	295	1	2	0	0	0	0	0	0	1	0	1	0
macs2_2.9e9_plus_peak_426	chr1	9141423	9141622	+	200	0	0	0	1	0	0	0	0	0	2	4	2
macs2_2.9e9_plus_peak_427	chr1	9142878	9143092	+	215	26	33	4	2	5	1	4	7	2	0	5	2
macs2_2.9e9_plus_peak_428	chr1	9199956	9200156	+	201	1	1	0	1	0	0	0	0	2	1	1	1
macs2_2.9e9_plus_peak_429	chr1	9245169	9245536	+	368	10	13	6	6	2	3	4	0	16	11	10	12
macs2_2.9e9_plus_peak_430	chr1	9246419	9246706	+	288	3	11	1	4	3	4	0	1	7	10	9	11
macs2_2.9e9_plus_peak_431	chr1	9251734	9252297	+	564	22	55	3	10	10	7	8	16	49	76	60	52
macs2_2.9e9_plus_peak_432	chr1	9258013	9258212	+	200	2	0	0	0	0	0	0	0	1	1	5	1
macs2_2.9e9_plus_peak_433	chr1	9263569	9263809	+	241	0	2	0	1	2	2	0	2	2	1	1	2
macs2_2.9e9_plus_peak_434	chr1	9268775	9269025	+	251	2	0	1	1	3	2	0	0	2	5	0	0
macs2_2.9e9_plus_peak_435	chr1	9296552	9296832	+	281	5	7	8	9	6	4	1	7	18	4	9	4
macs2_2.9e9_plus_peak_436	chr1	9298133	9298337	+	205	4	3	4	7	3	2	6	3	8	2	7	3
macs2_2.9e9_plus_peak_437	chr1	9299454	9299705	+	252	6	4	8	5	3	1	1	5	5	3	2	2
macs2_2.9e9_plus_peak_438	chr1	9302155	9302479	+	325	9	9	10	11	10	4	5	18	7	9	4	9
macs2_2.9e9_plus_peak_439	chr1	9306558	9306876	+	319	3	4	15	6	4	6	1	4	5	4	6	6
macs2_2.9e9_plus_peak_440	chr1	9309297	9309508	+	212	6	7	9	3	6	4	5	11	9	6	13	1
macs2_2.9e9_plus_peak_441	chr1	9312181	9312470	+	290	5	2	6	5	0	2	1	2	4	1	2	4
macs2_2.9e9_plus_peak_442	chr1	9314317	9314566	+	250	1	6	4	9	10	4	3	2	8	6	11	6
macs2_2.9e9_plus_peak_443	chr1	9318952	9319165	+	214	1	0	2	3	0	2	1	0	3	0	0	1
macs2_2.9e9_plus_peak_444	chr1	9325582	9325839	+	258	7	9	2	1	5	2	2	3	3	10	1	3
macs2_2.9e9_plus_peak_445	chr1	9327757	9328438	+	682	41	46	64	52	37	40	24	38	53	51	63	50
macs2_2.9e9_plus_peak_446	chr1	9331146	9331501	+	356	44	50	55	69	41	48	31	44	95	65	51	62
macs2_2.9e9_plus_peak_447	chr1	9338202	9338401	+	200	2	0	1	1	0	1	0	0	2	0	0	1
macs2_2.9e9_plus_peak_448	chr1	9358125	9358394	+	270	1	0	2	4	1	2	1	1	12	3	1	5
macs2_2.9e9_plus_peak_449	chr1	9359905	9360164	+	260	1	8	4	3	3	3	0	3	5	8	6	5
macs2_2.9e9_plus_peak_450	chr1	9370618	9370866	+	249	2	0	1	1	0	0	1	2	3	0	4	2
macs2_2.9e9_plus_peak_451	chr1	9375768	9376063	+	296	0	1	0	0	0	1	1	0	9	5	10	3
macs2_2.9e9_plus_peak_452	chr1	9381505	9381806	+	302	1	0	0	2	3	1	3	1	3	2	3	1
macs2_2.9e9_plus_peak_453	chr1	9389601	9389882	+	282	2	0	1	1	0	0	0	1	1	1	0	1
macs2_2.9e9_plus_peak_454	chr1	9395635	9395834	+	200	3	0	2	1	1	2	0	0	1	0	1	0
macs2_2.9e9_plus_peak_455	chr1	9396223	9396422	+	200	0	0	0	0	1	0	0	1	7	1	2	2
macs2_2.9e9_plus_peak_456	chr1	9427830	9428071	+	242	1	3	2	2	0	0	1	2	1	6	1	1
macs2_2.9e9_plus_peak_457	chr1	9429367	9429709	+	343	24	17	9	23	14	20	11	14	13	18	20	16
macs2_2.9e9_plus_peak_458	chr1	9489187	9489386	+	200	2	1	0	0	0	1	1	0	3	0	2	0
macs2_2.9e9_plus_peak_459	chr1	9599747	9599954	+	208	0	4	2	2	1	1	0	0	6	2	2	0
macs2_2.9e9_plus_peak_460	chr1	9601633	9601935	+	303	17	16	19	20	3	13	9	5	17	15	6	12
macs2_2.9e9_plus_peak_461	chr1	9614970	9615169	+	200	4	1	4	7	0	1	1	3	2	6	2	0
macs2_2.9e9_plus_peak_462	chr1	9617506	9618032	+	527	22	9	11	10	7	3	6	6	5	4	11	7
macs2_2.9e9_plus_peak_463	chr1	9620204	9620436	+	233	7	12	7	15	8	3	6	6	9	2	8	3
macs2_2.9e9_plus_peak_464	chr1	9623985	9624209	+	225	15	8	9	10	2	2	2	7	9	4	8	5
macs2_2.9e9_plus_peak_465	chr1	9624868	9625071	+	204	10	7	16	3	6	4	2	5	2	3	5	5
macs2_2.9e9_plus_peak_466	chr1	9629825	9630087	+	263	46	34	39	35	29	28	28	31	30	25	31	17
macs2_2.9e9_plus_peak_467	chr1	9632835	9633048	+	214	9	18	11	13	5	4	4	9	11	5	4	6
macs2_2.9e9_plus_peak_468	chr1	9635135	9635376	+	242	17	12	7	7	6	6	9	5	5	1	10	8
macs2_2.9e9_plus_peak_469	chr1	9637390	9637671	+	282	31	47	36	21	6	16	14	15	23	17	28	16
macs2_2.9e9_plus_peak_470	chr1	9642399	9642946	+	548	385	283	134	182	103	162	142	156	299	254	200	212
macs2_2.9e9_plus_peak_471	chr1	9643559	9643877	+	319	32	13	11	7	1	4	3	2	20	13	14	19
macs2_2.9e9_plus_peak_472	chr1	9645143	9645344	+	202	10	4	6	4	1	4	3	2	8	8	5	7
macs2_2.9e9_plus_peak_473	chr1	9656613	9656924	+	312	17	20	15	24	11	14	13	12	14	14	18	8
macs2_2.9e9_plus_peak_474	chr1	9664763	9665329	+	567	77	65	103	80	58	88	44	66	93	60	113	86
macs2_2.9e9_plus_peak_475	chr1	9668163	9668397	+	235	13	13	4	8	6	8	8	6	15	4	4	3
macs2_2.9e9_plus_peak_476	chr1	9674242	9675049	+	808	96	75	86	77	39	53	36	56	109	98	80	111
macs2_2.9e9_plus_peak_477	chr1	9682256	9682488	+	233	3	3	0	0	0	0	0	0	5	1	2	5
macs2_2.9e9_plus_peak_478	chr1	9753579	9753847	+	269	13	15	11	12	4	11	7	11	15	11	5	12
macs2_2.9e9_plus_peak_479	chr1	9754993	9755376	+	384	6	8	5	8	2	6	8	2	11	6	5	5
macs2_2.9e9_plus_peak_480	chr1	9756665	9756908	+	244	4	3	7	12	5	3	4	1	5	2	6	4
macs2_2.9e9_plus_peak_481	chr1	9757016	9757228	+	213	7	6	13	7	13	5	5	5	7	4	10	5
macs2_2.9e9_plus_peak_482	chr1	9762876	9763112	+	237	6	2	1	5	2	5	0	3	4	5	1	8
macs2_2.9e9_plus_peak_483	chr1	9763393	9763601	+	209	5	3	2	2	0	2	4	1	6	1	1	2
macs2_2.9e9_plus_peak_484	chr1	9765301	9765527	+	227	9	12	6	11	5	7	6	8	14	8	9	5
macs2_2.9e9_plus_peak_485	chr1	9779493	9779813	+	321	0	0	5	3	1	2	1	0	3	0	1	1
macs2_2.9e9_plus_peak_486	chr1	9788620	9789116	+	497	265	282	225	271	90	135	131	143	181	179	198	198
macs2_2.9e9_plus_peak_487	chr1	9827492	9827708	+	217	0	0	0	0	0	0	0	0	0	1	0	0
macs2_2.9e9_plus_peak_488	chr1	9886062	9886647	+	586	2	4	4	1	0	0	2	1	8	6	6	2
macs2_2.9e9_plus_peak_489	chr1	9905834	9906033	+	200	1	1	1	0	1	0	1	0	1	0	0	1
macs2_2.9e9_plus_peak_490	chr1	9952338	9952541	+	204	0	0	1	3	0	0	0	0	0	0	1	1
macs2_2.9e9_plus_peak_491	chr1	10004213	10004578	+	366	7	11	10	17	7	7	5	7	6	11	17	11
macs2_2.9e9_plus_peak_492	chr1	10005156	10005458	+	303	12	13	9	10	3	11	3	9	10	13	18	22
macs2_2.9e9_plus_peak_493	chr1	10006241	10006440	+	200	5	2	1	2	2	2	1	0	5	6	0	2
macs2_2.9e9_plus_peak_494	chr1	10009797	10010250	+	454	8	19	12	12	5	16	7	18	16	3	12	13
macs2_2.9e9_plus_peak_495	chr1	10011037	10011266	+	230	6	9	1	7	0	3	3	6	7	1	4	2
macs2_2.9e9_plus_peak_496	chr1	10019644	10019854	+	211	1	4	1	2	1	1	1	1	5	2	4	1
macs2_2.9e9_plus_peak_497	chr1	10020229	10020464	+	236	8	8	4	10	0	5	2	2	12	6	23	6
macs2_2.9e9_plus_peak_498	chr1	10035773	10035986	+	214	1	1	1	1	0	1	2	1	0	3	0	1
macs2_2.9e9_plus_peak_499	chr1	10041698	10042035	+	338	45	34	26	18	16	14	17	15	16	12	14	12
macs2_2.9e9_plus_peak_500	chr1	10043163	10043519	+	357	15	11	6	12	4	4	2	2	7	11	6	9
macs2_2.9e9_plus_peak_501	chr1	10044503	10044930	+	428	80	37	34	48	15	40	19	17	42	45	39	37
macs2_2.9e9_plus_peak_502	chr1	10045333	10045638	+	306	13	10	4	15	4	7	6	7	4	6	14	17
macs2_2.9e9_plus_peak_503	chr1	10049559	10049786	+	228	3	6	4	5	2	5	4	3	0	4	4	5
macs2_2.9e9_plus_peak_504	chr1	10057335	10057542	+	208	1	2	1	0	0	0	0	1	0	4	1	1
macs2_2.9e9_plus_peak_505	chr1	10066535	10066810	+	276	0	0	1	6	2	0	4	1	1	4	7	1
macs2_2.9e9_plus_peak_506	chr1	10067693	10067981	+	289	9	6	4	4	0	3	4	1	9	6	4	4
macs2_2.9e9_plus_peak_507	chr1	10068243	10068489	+	247	13	8	7	4	3	5	4	3	7	6	5	8
macs2_2.9e9_plus_peak_508	chr1	10072576	10072780	+	205	5	2	6	6	2	2	0	3	1	3	2	4
macs2_2.9e9_plus_peak_509	chr1	10075866	10076218	+	353	46	40	25	31	11	17	9	18	28	25	24	28
macs2_2.9e9_plus_peak_510	chr1	10096251	10096459	+	209	4	1	0	3	1	4	3	2	2	1	0	0
macs2_2.9e9_plus_peak_511	chr1	10099065	10099286	+	222	1	3	2	4	2	0	1	0	1	0	6	1
macs2_2.9e9_plus_peak_512	chr1	10105435	10105800	+	366	14	10	8	8	7	5	3	6	8	5	2	3
macs2_2.9e9_plus_peak_513	chr1	10109842	10110068	+	227	4	1	3	11	2	6	5	6	6	4	7	2
macs2_2.9e9_plus_peak_514	chr1	10116811	10117063	+	253	4	7	7	7	5	3	5	4	4	5	5	1
macs2_2.9e9_plus_peak_515	chr1	10117713	10117927	+	215	5	5	6	7	7	9	3	4	7	5	9	1
macs2_2.9e9_plus_peak_516	chr1	10125726	10126011	+	286	3	3	3	1	0	3	2	2	2	5	2	1
macs2_2.9e9_plus_peak_517	chr1	10130288	10130603	+	316	5	4	2	5	4	4	1	3	6	4	3	5
macs2_2.9e9_plus_peak_518	chr1	10132552	10132759	+	208	2	6	5	3	3	2	2	2	2	2	3	3
macs2_2.9e9_plus_peak_519	chr1	10132843	10133230	+	388	14	10	9	4	0	4	4	5	2	1	0	2
macs2_2.9e9_plus_peak_520	chr1	10140361	10140903	+	543	14	18	12	22	11	3	9	7	11	9	7	5
macs2_2.9e9_plus_peak_521	chr1	10140989	10141188	+	200	4	5	1	1	0	2	1	1	0	3	0	1
macs2_2.9e9_plus_peak_522	chr1	10147143	10147346	+	204	4	0	2	0	1	1	2	2	2	1	0	2
macs2_2.9e9_plus_peak_523	chr1	10151374	10151576	+	203	2	2	1	2	0	3	1	5	6	1	3	3
macs2_2.9e9_plus_peak_524	chr1	10152810	10153129	+	320	6	7	6	12	5	5	2	3	3	4	4	3
macs2_2.9e9_plus_peak_525	chr1	10155612	10155840	+	229	9	5	6	5	6	5	7	4	4	5	10	9
macs2_2.9e9_plus_peak_526	chr1	10157011	10157517	+	507	12	13	11	12	2	4	5	13	11	6	6	8
macs2_2.9e9_plus_peak_527	chr1	10160897	10161336	+	440	17	15	13	20	7	10	8	8	6	7	18	12
macs2_2.9e9_plus_peak_528	chr1	10162019	10162240	+	222	7	6	4	7	4	1	1	1	1	1	1	1
macs2_2.9e9_plus_peak_529	chr1	10170317	10170891	+	575	32	39	40	35	19	24	15	21	36	32	27	37
macs2_2.9e9_plus_peak_530	chr1	10174075	10174283	+	209	9	8	8	5	7	8	6	5	12	7	6	2
macs2_2.9e9_plus_peak_531	chr1	10174821	10175030	+	210	5	3	4	2	5	4	4	0	8	2	3	0
macs2_2.9e9_plus_peak_532	chr1	10177404	10177745	+	342	12	12	5	12	7	3	2	7	6	0	3	12
macs2_2.9e9_plus_peak_533	chr1	10183378	10183594	+	217	10	5	7	4	10	1	5	7	4	2	3	10
macs2_2.9e9_plus_peak_534	chr1	10184159	10184367	+	209	4	4	5	7	3	5	2	4	6	1	3	2
macs2_2.9e9_plus_peak_535	chr1	10185071	10185314	+	244	7	11	12	17	9	13	8	12	10	9	10	13
macs2_2.9e9_plus_peak_536	chr1	10187079	10187305	+	227	15	7	11	2	1	4	3	5	4	5	3	7
macs2_2.9e9_plus_peak_537	chr1	10191939	10192146	+	208	16	4	5	5	2	6	5	3	4	4	8	6
macs2_2.9e9_plus_peak_538	chr1	10193831	10194210	+	380	14	8	20	21	6	5	6	9	10	6	15	10
macs2_2.9e9_plus_peak_539	chr1	10199318	10199898	+	581	32	24	46	39	23	22	21	23	28	20	17	10
macs2_2.9e9_plus_peak_540	chr1	10200236	10200660	+	425	22	17	14	19	4	10	14	23	9	5	2	24
macs2_2.9e9_plus_peak_541	chr1	10204275	10204596	+	322	10	2	10	9	5	3	12	6	12	4	4	11
macs2_2.9e9_plus_peak_542	chr1	10204685	10204902	+	218	12	8	18	17	8	11	10	10	16	9	18	11
macs2_2.9e9_plus_peak_543	chr1	10205094	10205361	+	268	12	7	12	18	18	11	13	5	7	3	8	9
macs2_2.9e9_plus_peak_544	chr1	10205466	10205748	+	283	5	3	3	6	3	5	1	2	4	4	4	4
macs2_2.9e9_plus_peak_545	chr1	10212712	10212964	+	253	22	35	27	48	17	18	19	19	14	7	13	13
macs2_2.9e9_plus_peak_546	chr1	10213357	10213672	+	316	42	47	47	47	26	34	30	30	26	17	23	32
macs2_2.9e9_plus_peak_547	chr1	10214244	10214540	+	297	10	13	14	17	13	11	1	10	14	6	5	2
macs2_2.9e9_plus_peak_548	chr1	10214747	10215003	+	257	11	20	14	10	11	9	9	18	14	4	11	6
macs2_2.9e9_plus_peak_549	chr1	10215955	10216322	+	368	74	74	88	100	54	45	35	37	50	21	33	44
macs2_2.9e9_plus_peak_550	chr1	10218927	10219194	+	268	25	25	39	29	13	23	14	19	4	12	12	17
macs2_2.9e9_plus_peak_551	chr1	10223034	10223245	+	212	3	3	11	1	4	1	1	2	5	3	1	1
macs2_2.9e9_plus_peak_552	chr1	10224297	10224535	+	239	11	9	14	14	8	16	9	12	23	10	15	6
macs2_2.9e9_plus_peak_553	chr1	10226896	10227157	+	262	0	2	4	2	1	7	2	5	2	2	7	6
macs2_2.9e9_plus_peak_554	chr1	10228850	10229061	+	212	1	5	0	7	4	2	1	2	2	5	1	1
macs2_2.9e9_plus_peak_555	chr1	10234315	10234545	+	231	3	3	2	7	2	5	1	1	2	4	0	2
macs2_2.9e9_plus_peak_556	chr1	10235016	10235482	+	467	25	19	11	19	4	13	5	5	20	16	12	15
macs2_2.9e9_plus_peak_557	chr1	10240297	10241420	+	1124	212	185	85	130	54	92	54	73	105	89	97	94
macs2_2.9e9_plus_peak_558	chr1	10273917	10274281	+	365	4	4	4	7	1	4	4	1	4	0	5	4
macs2_2.9e9_plus_peak_559	chr1	10280287	10280694	+	408	5	12	3	9	6	10	1	3	4	2	4	6
macs2_2.9e9_plus_peak_560	chr1	10285448	10286537	+	1090	43	25	38	30	28	21	25	17	36	25	23	27
macs2_2.9e9_plus_peak_561	chr1	10292023	10292249	+	227	7	5	3	3	0	1	0	1	3	3	7	1
macs2_2.9e9_plus_peak_562	chr1	10293441	10293693	+	253	9	9	11	8	2	5	8	1	7	1	3	2
macs2_2.9e9_plus_peak_563	chr1	10297918	10298169	+	252	10	10	9	12	4	9	2	6	9	8	3	8
macs2_2.9e9_plus_peak_564	chr1	10298332	10298568	+	237	14	15	12	15	13	11	8	17	23	13	16	14
macs2_2.9e9_plus_peak_565	chr1	10301983	10302246	+	264	4	3	2	4	4	4	4	5	0	3	7	3
macs2_2.9e9_plus_peak_566	chr1	10308778	10308977	+	200	2	1	0	1	0	0	0	0	2	1	4	2
macs2_2.9e9_plus_peak_567	chr1	10314796	10315047	+	252	9	5	6	7	3	3	5	4	9	5	1	7
macs2_2.9e9_plus_peak_568	chr1	10318644	10318845	+	202	7	6	0	4	3	7	4	2	3	3	3	0
macs2_2.9e9_plus_peak_569	chr1	10319408	10319674	+	267	7	2	21	8	8	6	4	9	11	1	2	4
macs2_2.9e9_plus_peak_570	chr1	10319900	10320339	+	440	33	27	25	19	16	8	25	12	8	15	10	10
macs2_2.9e9_plus_peak_571	chr1	10323196	10323471	+	276	8	8	5	9	5	6	9	3	10	2	7	3
macs2_2.9e9_plus_peak_572	chr1	10330876	10331077	+	202	18	10	8	15	9	11	7	13	11	4	5	14
macs2_2.9e9_plus_peak_573	chr1	10333471	10333889	+	419	279	292	210	256	112	135	123	150	169	110	140	155
macs2_2.9e9_plus_peak_574	chr1	10334861	10335426	+	566	38	29	32	35	8	19	19	19	35	11	18	22
macs2_2.9e9_plus_peak_575	chr1	10343027	10343377	+	351	20	15	19	11	9	7	7	12	12	16	8	8
macs2_2.9e9_plus_peak_576	chr1	10344205	10344543	+	339	12	15	5	9	9	4	12	8	5	4	5	5
macs2_2.9e9_plus_peak_577	chr1	10344637	10344974	+	338	38	25	30	30	14	23	28	18	25	14	21	9
macs2_2.9e9_plus_peak_578	chr1	10348024	10348275	+	252	20	17	13	26	4	6	6	7	9	3	4	12
macs2_2.9e9_plus_peak_579	chr1	10349873	10350079	+	207	7	4	0	7	5	2	2	6	4	5	3	8
macs2_2.9e9_plus_peak_580	chr1	10351199	10351423	+	225	10	6	9	3	3	4	4	5	7	3	4	5
macs2_2.9e9_plus_peak_581	chr1	10355761	10355996	+	236	39	21	27	20	7	11	19	15	15	26	13	16
macs2_2.9e9_plus_peak_582	chr1	10356661	10356863	+	203	51	22	36	46	16	21	25	27	37	32	20	30
macs2_2.9e9_plus_peak_583	chr1	10356993	10357326	+	334	62	66	50	98	39	55	47	36	83	48	59	49
macs2_2.9e9_plus_peak_584	chr1	10358950	10359289	+	340	42	43	48	30	10	25	14	21	35	29	26	16
macs2_2.9e9_plus_peak_585	chr1	10360526	10360913	+	388	88	46	52	46	20	14	18	20	47	27	17	43
macs2_2.9e9_plus_peak_586	chr1	10363639	10363860	+	222	23	30	10	20	14	9	12	14	22	19	15	7
macs2_2.9e9_plus_peak_587	chr1	10364024	10364287	+	264	16	8	8	15	7	8	7	11	8	12	14	9
macs2_2.9e9_plus_peak_588	chr1	10366390	10366947	+	558	139	154	67	122	56	84	51	65	126	106	133	98
macs2_2.9e9_plus_peak_589	chr1	10368261	10368774	+	514	155	131	95	93	67	102	62	88	148	153	118	124
macs2_2.9e9_plus_peak_590	chr1	10373899	10374100	+	202	9	16	4	14	4	1	3	4	3	4	6	8
macs2_2.9e9_plus_peak_591	chr1	10376006	10376390	+	385	8	13	6	10	7	7	4	5	6	7	8	13
macs2_2.9e9_plus_peak_592	chr1	10380978	10381246	+	269	19	11	6	11	4	11	8	9	21	8	8	16
macs2_2.9e9_plus_peak_593	chr1	10381426	10381626	+	201	6	5	7	6	2	0	3	2	7	2	7	2
macs2_2.9e9_plus_peak_594	chr1	10381971	10382205	+	235	1	4	7	3	1	4	4	5	3	0	0	4
macs2_2.9e9_plus_peak_595	chr1	10384837	10385165	+	329	15	19	17	28	13	15	13	17	31	18	28	17
macs2_2.9e9_plus_peak_596	chr1	10387311	10387661	+	351	19	5	9	13	8	6	6	7	8	4	12	7
macs2_2.9e9_plus_peak_597	chr1	10388105	10388360	+	256	4	7	3	12	7	3	5	2	7	5	5	4
macs2_2.9e9_plus_peak_598	chr1	10394059	10394343	+	285	5	3	9	16	1	3	1	4	3	4	1	4
macs2_2.9e9_plus_peak_599	chr1	10395731	10396023	+	293	10	13	17	12	5	4	7	6	9	7	7	12
macs2_2.9e9_plus_peak_600	chr1	10400722	10400921	+	200	2	4	4	1	3	0	2	2	0	0	3	3
macs2_2.9e9_plus_peak_601	chr1	10401889	10402138	+	250	4	10	2	10	2	4	2	3	5	2	2	3
macs2_2.9e9_plus_peak_602	chr1	10405020	10405345	+	326	8	11	21	13	9	5	10	12	4	6	13	9
macs2_2.9e9_plus_peak_603	chr1	10409262	10409609	+	348	16	18	11	36	8	6	6	8	22	7	13	9
macs2_2.9e9_plus_peak_604	chr1	10410931	10411258	+	328	36	56	48	40	17	19	18	24	43	20	41	36
macs2_2.9e9_plus_peak_605	chr1	10411799	10412119	+	321	10	14	21	9	5	13	7	8	10	8	9	11
macs2_2.9e9_plus_peak_606	chr1	10416515	10416794	+	280	22	35	20	21	13	15	13	15	40	12	11	22
macs2_2.9e9_plus_peak_607	chr1	10417421	10417658	+	238	9	9	11	8	4	6	4	5	16	10	7	6
macs2_2.9e9_plus_peak_608	chr1	10417983	10418269	+	287	51	36	57	63	4	32	29	46	34	38	6	40
macs2_2.9e9_plus_peak_609	chr1	10418621	10418832	+	212	5	8	3	11	3	0	3	6	8	3	14	4
macs2_2.9e9_plus_peak_610	chr1	10420324	10420542	+	219	13	2	1	7	3	8	7	2	9	4	0	7
macs2_2.9e9_plus_peak_611	chr1	10422439	10422681	+	243	14	17	25	20	10	7	14	19	36	17	8	9
macs2_2.9e9_plus_peak_612	chr1	10423053	10423252	+	200	6	3	0	4	4	5	2	4	5	2	4	3
macs2_2.9e9_plus_peak_613	chr1	10430380	10430742	+	363	9	1	5	11	5	4	6	5	7	1	11	5
macs2_2.9e9_plus_peak_614	chr1	10431759	10432114	+	356	28	16	20	23	12	13	12	13	22	8	17	13
macs2_2.9e9_plus_peak_615	chr1	10436709	10436962	+	254	38	25	57	60	18	25	35	19	42	26	46	31
macs2_2.9e9_plus_peak_616	chr1	10437857	10438103	+	247	12	4	17	17	11	9	9	10	13	7	17	11
macs2_2.9e9_plus_peak_617	chr1	10440658	10440877	+	220	10	16	15	14	4	9	10	14	13	14	28	7
macs2_2.9e9_plus_peak_618	chr1	10441176	10441789	+	614	204	200	203	256	117	124	110	126	233	169	221	193
macs2_2.9e9_plus_peak_619	chr1	10446954	10447647	+	694	60	45	23	45	12	16	14	12	30	33	36	32
macs2_2.9e9_plus_peak_620	chr1	10449568	10449981	+	414	18	20	7	8	6	8	5	6	7	6	5	9
macs2_2.9e9_plus_peak_621	chr1	10451982	10452609	+	628	24	40	25	29	7	14	8	13	19	10	38	21
macs2_2.9e9_plus_peak_622	chr1	10457333	10457573	+	241	22	33	25	21	4	3	4	3	7	15	7	7
macs2_2.9e9_plus_peak_623	chr1	10458168	10458372	+	205	4	3	3	4	6	3	4	2	2	4	9	7
macs2_2.9e9_plus_peak_624	chr1	10461148	10461359	+	212	7	7	3	7	4	3	2	9	8	9	8	8
macs2_2.9e9_plus_peak_625	chr1	10463547	10463755	+	209	3	10	8	6	2	1	7	4	9	5	8	7
macs2_2.9e9_plus_peak_626	chr1	10464283	10464623	+	341	3	1	6	8	4	3	6	3	0	4	4	4
macs2_2.9e9_plus_peak_627	chr1	10466291	10466526	+	236	3	4	11	7	5	4	3	2	6	2	3	10
macs2_2.9e9_plus_peak_628	chr1	10467860	10468115	+	256	5	9	4	2	5	4	3	3	12	3	9	4
macs2_2.9e9_plus_peak_629	chr1	10469476	10469737	+	262	4	10	5	10	1	5	6	5	7	9	10	10
macs2_2.9e9_plus_peak_630	chr1	10479710	10480693	+	984	638	433	438	468	279	374	287	315	523	556	555	499
macs2_2.9e9_plus_peak_631	chr1	10491340	10491540	+	201	4	1	0	2	1	2	1	3	0	2	2	4
macs2_2.9e9_plus_peak_632	chr1	10493927	10494199	+	273	12	12	8	15	7	7	6	8	10	10	6	9
macs2_2.9e9_plus_peak_633	chr1	10495589	10495830	+	242	7	3	12	10	1	3	2	1	3	5	8	4
macs2_2.9e9_plus_peak_634	chr1	10500424	10500629	+	206	14	10	12	21	8	13	6	4	15	12	11	14
macs2_2.9e9_plus_peak_635	chr1	10502233	10502984	+	752	210	202	169	211	122	156	91	140	219	243	201	203
macs2_2.9e9_plus_peak_636	chr1	10511485	10512101	+	617	19	19	24	23	10	17	17	13	16	6	17	10
macs2_2.9e9_plus_peak_637	chr1	10535000	10535222	+	223	6	4	2	1	0	3	2	2	9	5	7	2
macs2_2.9e9_plus_peak_638	chr1	10536488	10536689	+	202	1	2	1	1	0	0	3	0	0	1	3	1
macs2_2.9e9_plus_peak_639	chr1	10560314	10560777	+	464	15	11	9	21	3	14	10	7	14	15	21	18
macs2_2.9e9_plus_peak_640	chr1	10566536	10566738	+	203	2	0	0	2	3	0	0	0	3	0	0	1
macs2_2.9e9_plus_peak_641	chr1	10573818	10574317	+	500	32	31	20	16	9	20	9	11	29	19	12	25
macs2_2.9e9_plus_peak_642	chr1	10579941	10580208	+	268	13	22	1	7	6	12	9	15	32	32	12	22
macs2_2.9e9_plus_peak_643	chr1	10583521	10583984	+	464	33	20	22	19	13	17	11	16	28	33	43	28
macs2_2.9e9_plus_peak_644	chr1	10585090	10585447	+	358	17	13	9	13	1	6	5	3	11	25	17	11
macs2_2.9e9_plus_peak_645	chr1	10596640	10596852	+	213	5	2	0	2	2	1	2	0	4	2	4	1
macs2_2.9e9_plus_peak_646	chr1	10597795	10598150	+	356	4	10	11	5	1	10	4	4	7	7	10	7
macs2_2.9e9_plus_peak_647	chr1	10602998	10603206	+	209	2	0	3	4	0	4	1	2	19	13	13	6
macs2_2.9e9_plus_peak_648	chr1	10605219	10605436	+	218	2	1	1	4	7	6	6	2	38	18	35	26
macs2_2.9e9_plus_peak_649	chr1	10606004	10606225	+	222	7	5	4	7	5	8	3	2	23	14	14	16
macs2_2.9e9_plus_peak_650	chr1	10606487	10606927	+	441	6	11	9	5	8	15	15	10	38	27	40	22
macs2_2.9e9_plus_peak_651	chr1	10607533	10607760	+	228	0	0	3	2	2	3	3	1	8	25	14	11
macs2_2.9e9_plus_peak_652	chr1	10609431	10609673	+	243	5	4	1	5	2	4	3	3	28	40	22	23
macs2_2.9e9_plus_peak_653	chr1	10618630	10618899	+	270	2	0	2	5	1	0	1	1	2	3	1	1
macs2_2.9e9_plus_peak_654	chr1	10627292	10627657	+	366	14	7	5	4	5	5	5	5	9	4	0	7
macs2_2.9e9_plus_peak_655	chr1	10634146	10634381	+	236	8	5	5	5	5	3	5	6	7	3	5	3
macs2_2.9e9_plus_peak_656	chr1	10634995	10635264	+	270	9	6	4	14	5	5	3	5	10	7	5	1
macs2_2.9e9_plus_peak_657	chr1	10637366	10637602	+	237	5	12	6	8	2	9	2	7	5	7	1	2
macs2_2.9e9_plus_peak_658	chr1	10639149	10639485	+	337	6	9	8	9	4	5	10	3	10	6	8	7
macs2_2.9e9_plus_peak_659	chr1	10645158	10645445	+	288	2	5	3	8	2	5	2	4	2	4	2	3
macs2_2.9e9_plus_peak_660	chr1	10648807	10649029	+	223	1	3	6	6	4	4	8	3	7	2	5	2
macs2_2.9e9_plus_peak_661	chr1	10652319	10652559	+	241	11	4	11	10	6	7	4	7	13	4	9	9
macs2_2.9e9_plus_peak_662	chr1	10655714	10655926	+	213	3	2	0	2	1	3	1	0	0	1	2	0
macs2_2.9e9_plus_peak_663	chr1	10660619	10660818	+	200	3	4	1	1	3	1	1	2	0	1	0	2
macs2_2.9e9_plus_peak_664	chr1	10661091	10661435	+	345	10	3	7	3	5	3	10	5	0	4	3	6
macs2_2.9e9_plus_peak_665	chr1	10667679	10668107	+	429	12	10	12	7	5	2	4	4	4	3	3	6
macs2_2.9e9_plus_peak_666	chr1	10668648	10668910	+	263	34	50	55	48	32	44	21	28	23	13	11	23
macs2_2.9e9_plus_peak_667	chr1	10671192	10671409	+	218	0	3	5	2	1	4	3	3	1	0	0	0
macs2_2.9e9_plus_peak_668	chr1	10675082	10675430	+	349	4	3	3	7	1	1	6	1	0	0	1	0
macs2_2.9e9_plus_peak_669	chr1	10680210	10680624	+	415	5	4	1	4	3	2	4	2	4	1	1	2
macs2_2.9e9_plus_peak_670	chr1	10680946	10681327	+	382	5	2	9	3	0	4	4	2	3	1	1	2
macs2_2.9e9_plus_peak_671	chr1	10690560	10690953	+	394	78	60	67	60	26	43	34	31	23	19	28	21
macs2_2.9e9_plus_peak_672	chr1	10696621	10696825	+	205	4	13	0	3	0	0	0	1	2	1	0	0
macs2_2.9e9_plus_peak_673	chr1	10697277	10697476	+	200	6	1	0	2	0	1	0	0	1	1	1	0
macs2_2.9e9_plus_peak_674	chr1	10884674	10884891	+	218	324	371	336	269	50	284	172	245	372	274	75	236
macs2_2.9e9_plus_peak_675	chr1	10955615	10955835	+	221	1	0	4	1	0	1	2	0	1	0	4	0
macs2_2.9e9_plus_peak_676	chr1	11043072	11043297	+	226	2	2	4	3	2	4	1	3	6	3	2	0
macs2_2.9e9_plus_peak_677	chr1	11072717	11072947	+	231	164	87	172	120	115	116	111	84	265	105	242	101
macs2_2.9e9_plus_peak_678	chr1	11073811	11074189	+	379	89	92	95	106	83	64	82	68	100	71	118	89
macs2_2.9e9_plus_peak_679	chr1	11075029	11075285	+	257	12	6	10	6	8	8	5	6	10	3	6	3
macs2_2.9e9_plus_peak_680	chr1	11080573	11080788	+	216	44	37	41	36	35	21	24	15	29	33	36	36
macs2_2.9e9_plus_peak_681	chr1	11082028	11082295	+	268	120	64	126	124	89	72	92	100	73	46	50	88
macs2_2.9e9_plus_peak_682	chr1	11082699	11083013	+	315	189	179	171	187	109	111	78	101	147	131	155	136
macs2_2.9e9_plus_peak_683	chr1	11083453	11084322	+	870	598	557	496	570	314	402	318	390	489	519	438	573
macs2_2.9e9_plus_peak_684	chr1	11084890	11085109	+	220	24	28	22	28	8	15	4	11	14	19	25	21
macs2_2.9e9_plus_peak_685	chr1	11085230	11085673	+	444	233	230	153	195	56	84	78	108	102	97	31	116
macs2_2.9e9_plus_peak_686	chr1	11090340	11090700	+	361	32	18	7	13	5	3	4	4	14	17	25	12
macs2_2.9e9_plus_peak_687	chr1	11109961	11110170	+	210	0	1	0	0	1	2	0	0	1	0	0	2
macs2_2.9e9_plus_peak_688	chr1	11120453	11120717	+	265	8	6	2	2	0	4	1	1	5	6	0	1
macs2_2.9e9_plus_peak_689	chr1	11120874	11121087	+	214	3	8	8	7	4	10	4	6	14	8	7	10
macs2_2.9e9_plus_peak_690	chr1	11121382	11121629	+	248	2	1	1	5	2	2	0	4	3	6	5	5
macs2_2.9e9_plus_peak_691	chr1	11122675	11122932	+	258	1	3	2	3	1	2	1	5	6	6	2	2
macs2_2.9e9_plus_peak_692	chr1	11130186	11130693	+	508	24	8	3	13	4	7	4	11	8	16	16	16
macs2_2.9e9_plus_peak_693	chr1	11161900	11162278	+	379	12	4	6	7	3	6	4	3	6	16	9	7
macs2_2.9e9_plus_peak_694	chr1	11335092	11335513	+	422	9	7	8	8	7	4	5	5	8	8	12	12
macs2_2.9e9_plus_peak_695	chr1	11336695	11336909	+	215	1	2	0	3	1	1	0	2	5	0	5	1
macs2_2.9e9_plus_peak_696	chr1	11346007	11346521	+	515	89	71	50	54	44	64	44	62	69	65	84	55
macs2_2.9e9_plus_peak_697	chr1	11347564	11348612	+	1049	285	228	166	175	76	178	111	132	309	335	255	287
macs2_2.9e9_plus_peak_698	chr1	11359468	11359771	+	304	7	9	8	4	2	5	3	5	5	7	4	5
macs2_2.9e9_plus_peak_699	chr1	11361521	11361803	+	283	2	5	3	0	1	1	1	3	2	3	1	2
macs2_2.9e9_plus_peak_700	chr1	11369770	11370041	+	272	1	2	1	5	0	1	3	0	3	2	1	0
macs2_2.9e9_plus_peak_701	chr1	11543554	11543798	+	245	0	0	1	0	0	0	2	1	2	9	0	8
macs2_2.9e9_plus_peak_702	chr1	11568374	11568573	+	200	0	1	1	1	1	1	0	2	1	0	1	0
macs2_2.9e9_plus_peak_703	chr1	11570509	11570767	+	259	3	3	4	5	1	0	5	0	1	1	0	0
macs2_2.9e9_plus_peak_704	chr1	11597511	11597719	+	209	1	4	2	3	1	2	1	1	2	2	2	2
macs2_2.9e9_plus_peak_705	chr1	11715495	11715694	+	200	0	1	3	0	0	0	1	0	2	2	0	0
macs2_2.9e9_plus_peak_706	chr1	11721987	11722481	+	495	27	20	42	49	22	18	19	16	28	24	35	29
macs2_2.9e9_plus_peak_707	chr1	11722837	11723521	+	685	75	114	65	81	39	32	32	42	60	50	62	56
macs2_2.9e9_plus_peak_708	chr1	11766993	11767236	+	244	1	2	3	1	2	2	2	2	4	1	0	3
macs2_2.9e9_plus_peak_709	chr1	11785838	11786050	+	213	2	0	0	0	0	0	0	0	1	0	5	5
macs2_2.9e9_plus_peak_710	chr1	11791187	11791393	+	207	1	0	1	0	0	0	0	1	3	1	2	3
macs2_2.9e9_plus_peak_711	chr1	11804253	11804487	+	235	5	4	1	2	2	2	3	0	3	0	6	1
macs2_2.9e9_plus_peak_712	chr1	11804692	11804926	+	235	2	1	1	2	2	2	2	0	0	1	0	1
macs2_2.9e9_plus_peak_713	chr1	11810333	11810960	+	628	190	119	195	180	109	152	142	179	193	213	200	207
macs2_2.9e9_plus_peak_714	chr1	11814672	11814981	+	310	13	14	3	6	2	2	2	4	17	16	25	17
macs2_2.9e9_plus_peak_715	chr1	11822765	11822981	+	217	0	2	1	1	1	2	0	0	0	1	2	3
macs2_2.9e9_plus_peak_716	chr1	11824956	11825239	+	284	3	3	1	8	4	3	2	2	2	5	8	1
macs2_2.9e9_plus_peak_717	chr1	11830191	11830395	+	205	1	1	0	2	1	0	0	0	2	1	1	2
macs2_2.9e9_plus_peak_718	chr1	11838190	11838450	+	261	2	3	5	3	2	1	0	3	2	2	4	5
macs2_2.9e9_plus_peak_719	chr1	11843773	11844010	+	238	4	2	4	0	1	0	0	0	1	0	0	4
macs2_2.9e9_plus_peak_720	chr1	11849429	11849767	+	339	7	1	3	9	0	2	4	2	10	4	9	10
macs2_2.9e9_plus_peak_721	chr1	11872537	11872815	+	279	5	2	5	7	2	3	3	0	2	4	0	3
macs2_2.9e9_plus_peak_722	chr1	11876761	11876960	+	200	1	0	1	1	0	2	4	4	4	0	3	3
macs2_2.9e9_plus_peak_723	chr1	11877997	11878301	+	305	10	6	7	7	1	5	2	1	7	4	2	4
macs2_2.9e9_plus_peak_724	chr1	11883108	11883642	+	535	19	22	19	18	15	10	7	17	12	12	9	7
macs2_2.9e9_plus_peak_725	chr1	11890160	11890559	+	400	45	41	36	39	14	12	13	15	28	16	32	15
macs2_2.9e9_plus_peak_726	chr1	11902683	11903327	+	645	217	147	124	153	75	97	75	98	86	89	104	123
macs2_2.9e9_plus_peak_727	chr1	11907998	11908257	+	260	3	3	0	3	0	6	0	1	4	1	2	0
macs2_2.9e9_plus_peak_728	chr1	11968215	11968439	+	225	24	16	15	10	12	10	16	12	26	7	21	13
macs2_2.9e9_plus_peak_729	chr1	11969320	11969657	+	338	2	1	0	4	7	11	2	4	1	6	4	2
macs2_2.9e9_plus_peak_730	chr1	11986987	11987233	+	247	0	1	3	4	2	2	0	1	3	0	2	2
macs2_2.9e9_plus_peak_731	chr1	11995449	11995669	+	221	6	2	3	0	1	1	2	0	3	3	1	4
macs2_2.9e9_plus_peak_732	chr1	12007195	12007430	+	236	1	0	1	1	3	0	1	0	1	3	1	2
macs2_2.9e9_plus_peak_733	chr1	12008710	12008909	+	200	0	1	1	3	1	1	0	0	3	1	1	0
macs2_2.9e9_plus_peak_734	chr1	12014286	12014534	+	249	1	7	4	3	3	1	6	1	3	2	7	5
macs2_2.9e9_plus_peak_735	chr1	12016363	12016574	+	212	2	0	1	2	1	0	1	0	3	1	0	4
macs2_2.9e9_plus_peak_736	chr1	12021352	12021567	+	216	2	0	0	1	2	1	2	0	2	0	0	2
macs2_2.9e9_plus_peak_737	chr1	12023045	12023258	+	214	2	0	0	2	2	2	0	1	2	1	0	1
macs2_2.9e9_plus_peak_738	chr1	12035113	12035805	+	693	469	422	295	285	153	184	194	210	238	226	227	234
macs2_2.9e9_plus_peak_739	chr1	12040499	12040720	+	222	12	3	11	6	5	7	5	6	7	5	12	4
macs2_2.9e9_plus_peak_740	chr1	12042071	12042355	+	285	13	9	5	2	5	6	0	2	9	12	10	4
macs2_2.9e9_plus_peak_741	chr1	12047285	12047484	+	200	4	6	3	2	3	5	3	0	2	0	1	1
macs2_2.9e9_plus_peak_742	chr1	12047614	12048261	+	648	9	12	12	9	10	7	6	5	11	5	8	4
macs2_2.9e9_plus_peak_743	chr1	12052033	12052319	+	287	10	3	8	11	5	5	7	8	3	2	4	2
macs2_2.9e9_plus_peak_744	chr1	12053364	12053565	+	202	3	1	2	2	2	3	0	4	0	1	1	1
macs2_2.9e9_plus_peak_745	chr1	12053668	12053881	+	214	4	2	5	3	2	1	1	2	6	7	3	2
macs2_2.9e9_plus_peak_746	chr1	12056992	12057195	+	204	3	4	0	5	1	1	3	1	3	1	2	2
macs2_2.9e9_plus_peak_747	chr1	12060904	12061240	+	337	15	10	13	4	2	3	5	6	4	1	3	1
macs2_2.9e9_plus_peak_748	chr1	12063584	12063815	+	232	2	6	3	3	3	1	6	1	1	3	2	1
macs2_2.9e9_plus_peak_749	chr1	12072900	12073700	+	801	417	437	374	466	211	305	283	298	376	357	432	377
macs2_2.9e9_plus_peak_750	chr1	12078952	12079176	+	225	1	1	0	4	1	1	0	1	0	2	0	1
macs2_2.9e9_plus_peak_751	chr1	12091372	12091641	+	270	10	2	9	3	0	6	3	8	8	9	3	13
macs2_2.9e9_plus_peak_752	chr1	12091816	12092244	+	429	111	87	96	93	50	102	44	73	155	103	138	136
macs2_2.9e9_plus_peak_753	chr1	12156343	12156550	+	208	11	2	1	1	2	3	1	0	1	1	2	2
macs2_2.9e9_plus_peak_754	chr1	12197299	12197522	+	224	8	4	4	4	2	3	2	8	12	13	5	6
macs2_2.9e9_plus_peak_755	chr1	12269161	12269393	+	233	2	0	1	0	1	4	1	3	3	6	3	6
macs2_2.9e9_plus_peak_756	chr1	12290101	12290351	+	251	8	3	9	8	4	5	8	8	17	11	12	5
macs2_2.9e9_plus_peak_757	chr1	12297027	12297441	+	415	44	28	36	21	14	23	19	16	24	24	26	28
macs2_2.9e9_plus_peak_758	chr1	12297593	12297794	+	202	2	2	0	5	2	2	1	1	2	3	2	4
macs2_2.9e9_plus_peak_759	chr1	12298098	12298309	+	212	8	4	1	3	2	3	4	3	4	3	2	6
macs2_2.9e9_plus_peak_760	chr1	12304046	12304248	+	203	3	4	1	1	1	0	0	4	4	2	3	0
macs2_2.9e9_plus_peak_761	chr1	12305678	12305893	+	216	4	5	5	3	0	2	3	3	3	3	2	2
macs2_2.9e9_plus_peak_762	chr1	12307411	12307678	+	268	6	10	3	6	6	1	2	1	5	1	0	3
macs2_2.9e9_plus_peak_763	chr1	12312774	12313009	+	236	3	4	7	8	2	3	3	2	6	1	0	3
macs2_2.9e9_plus_peak_764	chr1	12315817	12316364	+	548	13	7	23	20	8	12	9	7	21	16	17	13
macs2_2.9e9_plus_peak_765	chr1	12318004	12318205	+	202	3	6	1	5	4	1	3	3	3	6	3	0
macs2_2.9e9_plus_peak_766	chr1	12323428	12323629	+	202	1	1	4	2	0	0	5	0	3	0	0	2
macs2_2.9e9_plus_peak_767	chr1	12326096	12326323	+	228	3	3	4	3	2	0	0	2	5	1	2	2
macs2_2.9e9_plus_peak_768	chr1	12326973	12327180	+	208	9	8	16	8	4	7	8	5	6	4	12	3
macs2_2.9e9_plus_peak_769	chr1	12336165	12336472	+	308	1	6	1	9	1	4	7	6	4	2	5	2
macs2_2.9e9_plus_peak_770	chr1	12344398	12344597	+	200	5	4	2	1	1	0	0	0	1	0	0	0
macs2_2.9e9_plus_peak_771	chr1	12349844	12350097	+	254	1	0	1	0	3	3	3	2	0	0	3	0
macs2_2.9e9_plus_peak_772	chr1	12355136	12355843	+	708	6	11	5	11	4	5	8	6	8	9	7	8
macs2_2.9e9_plus_peak_773	chr1	12363500	12363704	+	205	3	1	0	1	0	0	2	1	0	0	3	3
macs2_2.9e9_plus_peak_774	chr1	12368625	12368829	+	205	6	1	0	5	1	4	1	3	4	3	1	4
macs2_2.9e9_plus_peak_775	chr1	12369753	12370263	+	511	8	9	8	13	6	5	7	11	6	10	8	9
macs2_2.9e9_plus_peak_776	chr1	12371602	12372077	+	476	24	7	9	13	16	14	12	7	12	11	18	6
macs2_2.9e9_plus_peak_777	chr1	12377691	12377904	+	214	1	2	1	2	0	1	1	2	4	3	1	1
macs2_2.9e9_plus_peak_778	chr1	12380537	12380943	+	407	7	5	8	8	4	7	3	4	6	4	4	8
macs2_2.9e9_plus_peak_779	chr1	12383931	12384130	+	200	3	0	1	1	0	2	1	0	0	0	2	1
macs2_2.9e9_plus_peak_780	chr1	12391628	12391875	+	248	3	4	4	1	2	0	2	1	1	2	1	1
macs2_2.9e9_plus_peak_781	chr1	12392707	12392948	+	242	23	16	18	26	10	23	10	18	27	10	20	23
macs2_2.9e9_plus_peak_782	chr1	12397798	12398192	+	395	10	9	9	15	7	5	4	7	9	11	10	7
macs2_2.9e9_plus_peak_783	chr1	12402970	12403294	+	325	5	5	7	10	2	7	6	4	7	4	8	8
macs2_2.9e9_plus_peak_784	chr1	12406187	12406437	+	251	14	8	14	7	7	7	5	8	13	8	6	10
macs2_2.9e9_plus_peak_785	chr1	12410483	12410843	+	361	23	26	9	15	3	5	7	5	10	5	10	11
macs2_2.9e9_plus_peak_786	chr1	12412338	12412609	+	272	12	21	11	6	6	6	8	6	8	1	4	10
macs2_2.9e9_plus_peak_787	chr1	12423868	12424150	+	283	12	8	5	8	4	6	3	0	4	8	5	0
macs2_2.9e9_plus_peak_788	chr1	12425699	12426013	+	315	4	1	2	1	0	3	0	1	1	1	0	1
macs2_2.9e9_plus_peak_789	chr1	12429649	12429934	+	286	6	7	1	6	6	2	2	1	2	4	1	3
macs2_2.9e9_plus_peak_790	chr1	12433810	12434010	+	201	8	6	0	5	3	5	5	4	3	2	5	2
macs2_2.9e9_plus_peak_791	chr1	12438086	12438301	+	216	3	1	4	2	0	1	2	0	2	5	1	1
macs2_2.9e9_plus_peak_792	chr1	12439580	12439835	+	256	20	15	10	10	7	7	11	11	15	13	18	7
macs2_2.9e9_plus_peak_793	chr1	12443056	12443256	+	201	24	16	15	9	12	11	16	14	14	15	19	11
macs2_2.9e9_plus_peak_794	chr1	12445563	12445779	+	217	2	3	4	3	2	1	0	1	1	1	1	1
macs2_2.9e9_plus_peak_795	chr1	12447615	12447863	+	249	5	3	2	9	2	4	0	0	5	1	4	0
macs2_2.9e9_plus_peak_796	chr1	12448514	12448947	+	434	17	19	14	23	5	7	9	8	11	10	15	13
macs2_2.9e9_plus_peak_797	chr1	12452398	12452740	+	343	20	19	15	11	4	5	5	9	14	10	8	6
macs2_2.9e9_plus_peak_798	chr1	12464034	12464345	+	312	56	30	39	56	14	25	25	23	49	40	43	27
macs2_2.9e9_plus_peak_799	chr1	12470396	12470654	+	259	1	3	1	1	0	2	0	1	3	0	0	0
macs2_2.9e9_plus_peak_800	chr1	12471244	12471510	+	267	6	1	3	0	5	0	2	0	2	2	1	1
macs2_2.9e9_plus_peak_801	chr1	12483101	12483554	+	454	15	11	7	9	0	3	4	5	12	16	11	10
macs2_2.9e9_plus_peak_802	chr1	12492311	12492562	+	252	3	4	0	1	0	1	1	2	4	4	7	3
macs2_2.9e9_plus_peak_803	chr1	12493148	12493467	+	320	18	13	4	18	5	9	9	8	23	5	18	16
macs2_2.9e9_plus_peak_804	chr1	12495248	12495451	+	204	4	5	1	0	2	1	0	0	2	0	1	4
macs2_2.9e9_plus_peak_805	chr1	12500435	12500646	+	212	2	0	1	1	1	1	0	0	1	1	2	0
macs2_2.9e9_plus_peak_806	chr1	12509042	12509262	+	221	5	2	2	6	6	2	2	0	4	1	4	4
macs2_2.9e9_plus_peak_807	chr1	12513294	12513493	+	200	5	1	0	1	0	0	0	0	0	2	4	0
macs2_2.9e9_plus_peak_808	chr1	12518487	12518727	+	241	1	0	1	5	1	2	5	2	5	1	5	1
macs2_2.9e9_plus_peak_809	chr1	12520459	12520676	+	218	0	0	1	1	2	0	1	2	3	5	6	4
macs2_2.9e9_plus_peak_810	chr1	12522843	12523244	+	402	20	22	16	21	1	10	9	9	30	38	50	29
macs2_2.9e9_plus_peak_811	chr1	12527794	12528359	+	566	3	22	1	0	4	0	2	5	22	13	18	17
macs2_2.9e9_plus_peak_812	chr1	12528911	12529192	+	282	1	5	0	10	0	3	1	1	7	7	14	12
macs2_2.9e9_plus_peak_813	chr1	12535653	12536086	+	434	7	10	7	8	5	7	2	10	33	15	11	16
macs2_2.9e9_plus_peak_814	chr1	12542416	12542734	+	319	3	4	4	3	1	2	1	1	8	0	4	3
macs2_2.9e9_plus_peak_815	chr1	12547569	12547774	+	206	2	0	2	4	1	3	3	3	4	2	2	2
macs2_2.9e9_plus_peak_816	chr1	12548449	12548838	+	390	9	5	5	3	2	1	2	6	5	5	8	5
macs2_2.9e9_plus_peak_817	chr1	12553076	12553645	+	570	5	12	0	13	2	3	2	4	7	13	2	7
macs2_2.9e9_plus_peak_818	chr1	12562438	12562790	+	353	9	16	13	8	2	5	2	5	12	8	9	4
macs2_2.9e9_plus_peak_819	chr1	12564062	12564312	+	251	15	18	8	26	10	9	2	4	9	6	18	9
macs2_2.9e9_plus_peak_820	chr1	12567381	12567684	+	304	4	4	6	1	1	3	2	0	1	1	1	4
macs2_2.9e9_plus_peak_821	chr1	12568440	12568878	+	439	16	21	19	25	13	15	13	13	16	9	13	15
macs2_2.9e9_plus_peak_822	chr1	12569187	12569612	+	426	48	47	49	49	36	37	23	22	29	24	33	32
macs2_2.9e9_plus_peak_823	chr1	12570188	12570524	+	337	152	165	95	166	62	91	62	98	75	91	106	122
macs2_2.9e9_plus_peak_824	chr1	12571866	12572177	+	312	85	52	41	40	27	30	20	28	25	29	45	29
macs2_2.9e9_plus_peak_825	chr1	12681271	12681539	+	269	6	1	0	4	1	1	2	0	3	2	1	1
macs2_2.9e9_plus_peak_826	chr1	13399707	13399913	+	207	0	0	0	0	0	0	0	0	0	0	0	0
macs2_2.9e9_plus_peak_827	chr1	13912746	13913379	+	634	20	17	9	28	5	16	7	8	13	16	11	15
macs2_2.9e9_plus_peak_828	chr1	13921380	13921582	+	203	0	0	0	0	0	1	0	0	1	1	2	3
macs2_2.9e9_plus_peak_829	chr1	13933012	13933313	+	302	7	13	7	12	6	3	7	5	12	15	22	17
macs2_2.9e9_plus_peak_830	chr1	13940867	13941069	+	203	14	7	11	8	5	6	8	3	10	2	2	3
macs2_2.9e9_plus_peak_831	chr1	13942472	13943017	+	546	58	36	44	48	32	40	38	28	27	23	42	28
macs2_2.9e9_plus_peak_832	chr1	13944161	13944581	+	421	198	170	143	152	74	115	60	86	153	121	170	130
macs2_2.9e9_plus_peak_833	chr1	13956980	13957240	+	261	2	1	0	2	0	1	0	0	1	1	8	2
macs2_2.9e9_plus_peak_834	chr1	13965275	13965585	+	311	3	5	6	10	1	3	3	2	9	0	7	9
macs2_2.9e9_plus_peak_835	chr1	13978449	13978825	+	377	14	8	9	5	1	1	1	5	7	4	3	7
macs2_2.9e9_plus_peak_836	chr1	13985539	13985769	+	231	1	2	1	0	1	0	0	2	0	0	0	1
macs2_2.9e9_plus_peak_837	chr1	13985847	13986075	+	229	0	0	0	0	0	0	0	0	0	0	0	0
macs2_2.9e9_plus_peak_838	chr1	13988793	13989011	+	219	2	1	2	0	1	0	2	1	2	0	4	1
macs2_2.9e9_plus_peak_839	chr1	14027297	14027557	+	261	0	2	0	1	1	0	2	3	4	2	2	3
macs2_2.9e9_plus_peak_840	chr1	14028393	14028595	+	203	4	3	1	4	0	1	1	3	4	2	2	1
macs2_2.9e9_plus_peak_841	chr1	14032370	14032588	+	219	3	2	2	4	2	1	2	1	3	8	7	6
macs2_2.9e9_plus_peak_842	chr1	14033238	14033556	+	319	10	7	7	7	4	6	6	7	5	7	1	7
macs2_2.9e9_plus_peak_843	chr1	14034423	14034625	+	203	9	2	3	5	0	0	1	1	6	7	3	0
macs2_2.9e9_plus_peak_844	chr1	14038255	14038835	+	581	38	36	33	33	24	22	22	24	39	19	22	27
macs2_2.9e9_plus_peak_845	chr1	14039120	14039379	+	260	8	15	10	3	1	4	4	6	6	2	7	2
macs2_2.9e9_plus_peak_846	chr1	14040937	14041144	+	208	2	6	5	2	1	6	1	2	3	0	1	1
macs2_2.9e9_plus_peak_847	chr1	14047973	14048253	+	281	5	5	0	5	5	0	1	3	0	0	2	3
macs2_2.9e9_plus_peak_848	chr1	14051993	14052195	+	203	6	7	6	7	6	4	1	5	6	7	9	6
macs2_2.9e9_plus_peak_849	chr1	14055038	14055325	+	288	30	28	18	25	10	11	8	5	17	20	21	22
macs2_2.9e9_plus_peak_850	chr1	14057513	14057805	+	293	23	16	18	14	13	10	7	21	16	19	29	12
macs2_2.9e9_plus_peak_851	chr1	14059330	14059600	+	271	16	12	4	4	3	6	4	9	1	7	5	7
macs2_2.9e9_plus_peak_852	chr1	14064307	14064614	+	308	2	4	4	2	1	1	5	3	1	5	5	2
macs2_2.9e9_plus_peak_853	chr1	14068534	14068804	+	271	19	7	4	10	7	2	3	6	1	3	1	0
macs2_2.9e9_plus_peak_854	chr1	14074052	14074404	+	353	26	33	28	39	17	13	16	16	22	23	12	31
macs2_2.9e9_plus_peak_855	chr1	14075888	14076140	+	253	59	83	19	56	22	31	40	16	30	14	24	27
macs2_2.9e9_plus_peak_856	chr1	14082461	14082874	+	414	15	7	8	9	8	12	9	3	22	11	20	15
macs2_2.9e9_plus_peak_857	chr1	14084798	14085042	+	245	28	22	7	12	8	16	6	8	30	18	33	24
macs2_2.9e9_plus_peak_858	chr1	14087006	14087466	+	461	74	54	46	47	30	22	31	36	86	110	84	67
macs2_2.9e9_plus_peak_859	chr1	14089958	14090174	+	217	3	8	4	0	5	4	6	4	41	23	16	15
macs2_2.9e9_plus_peak_860	chr1	14093600	14093864	+	265	11	3	3	8	2	5	0	1	10	15	12	14
macs2_2.9e9_plus_peak_861	chr1	14098535	14098852	+	318	6	15	8	4	5	8	2	7	18	24	16	20
macs2_2.9e9_plus_peak_862	chr1	14099320	14099756	+	437	59	74	27	54	29	38	35	23	60	32	50	47
macs2_2.9e9_plus_peak_863	chr1	14100078	14100280	+	203	11	3	6	5	2	7	2	3	9	5	4	7
macs2_2.9e9_plus_peak_864	chr1	14101340	14101545	+	206	5	8	1	5	4	8	4	4	5	4	6	7
macs2_2.9e9_plus_peak_865	chr1	14105016	14105275	+	260	4	6	6	11	3	3	1	4	5	8	9	7
macs2_2.9e9_plus_peak_866	chr1	14108308	14108871	+	564	37	28	16	19	25	17	12	19	34	29	41	27
macs2_2.9e9_plus_peak_867	chr1	14113918	14114690	+	773	195	140	88	84	45	89	62	78	154	157	131	145
macs2_2.9e9_plus_peak_868	chr1	14119937	14120444	+	508	21	17	11	11	4	6	10	8	7	7	5	7
macs2_2.9e9_plus_peak_869	chr1	14124556	14124779	+	224	7	6	0	8	2	2	4	2	7	1	1	5
macs2_2.9e9_plus_peak_870	chr1	14125832	14126049	+	218	0	3	0	1	2	2	0	1	1	1	1	0
macs2_2.9e9_plus_peak_871	chr1	14134847	14135064	+	218	7	5	3	4	2	2	4	5	4	0	3	2
macs2_2.9e9_plus_peak_872	chr1	14138825	14139025	+	201	1	0	1	4	1	0	1	2	0	1	1	1
macs2_2.9e9_plus_peak_873	chr1	14149429	14149683	+	255	15	25	24	23	8	1	7	8	3	0	2	5
macs2_2.9e9_plus_peak_874	chr1	14149761	14150098	+	338	32	16	25	30	5	4	7	7	2	2	1	1
macs2_2.9e9_plus_peak_875	chr1	14150279	14150640	+	362	69	79	53	49	29	18	22	27	6	8	8	3
macs2_2.9e9_plus_peak_876	chr1	14151349	14151691	+	343	75	110	46	76	20	24	12	14	3	7	5	13
macs2_2.9e9_plus_peak_877	chr1	14157382	14157587	+	206	6	2	5	2	1	2	0	1	1	4	3	6
macs2_2.9e9_plus_peak_878	chr1	14214318	14214604	+	287	8	3	1	3	0	1	3	3	2	0	1	6
macs2_2.9e9_plus_peak_879	chr1	14227193	14227612	+	420	3	2	0	2	2	1	0	2	6	3	1	0
macs2_2.9e9_plus_peak_880	chr1	14235721	14235957	+	237	4	0	0	1	3	0	2	0	0	0	1	2
macs2_2.9e9_plus_peak_881	chr1	14244087	14244407	+	321	4	6	3	6	4	6	2	2	4	3	4	1
macs2_2.9e9_plus_peak_882	chr1	14252894	14253268	+	375	0	5	3	0	0	7	4	0	7	1	3	2
macs2_2.9e9_plus_peak_883	chr1	14260522	14260723	+	202	0	1	3	2	3	2	1	1	0	2	0	1
macs2_2.9e9_plus_peak_884	chr1	14271107	14271379	+	273	0	1	0	2	0	1	2	2	2	3	1	0
macs2_2.9e9_plus_peak_885	chr1	14281694	14281901	+	208	0	0	0	0	0	0	0	0	5	4	2	7
macs2_2.9e9_plus_peak_886	chr1	14289938	14290241	+	304	3	2	0	2	1	0	1	0	1	0	0	0
macs2_2.9e9_plus_peak_887	chr1	14304532	14304737	+	206	4	1	0	3	1	1	0	2	0	1	2	0
macs2_2.9e9_plus_peak_888	chr1	14305482	14305701	+	220	8	2	6	5	3	2	2	1	2	2	2	4
macs2_2.9e9_plus_peak_889	chr1	14321455	14321693	+	239	0	4	2	5	0	0	0	1	1	1	1	0
macs2_2.9e9_plus_peak_890	chr1	14323997	14324280	+	284	4	2	0	0	0	2	0	1	1	2	3	2
macs2_2.9e9_plus_peak_891	chr1	14329724	14329954	+	231	9	7	3	11	0	3	1	3	8	2	3	0
macs2_2.9e9_plus_peak_892	chr1	14348651	14349147	+	497	5	8	4	10	1	5	1	0	3	2	6	0
macs2_2.9e9_plus_peak_893	chr1	14378800	14378999	+	200	1	1	1	1	0	1	0	1	0	0	0	1
macs2_2.9e9_plus_peak_894	chr1	14386705	14386904	+	200	0	4	0	2	0	1	0	1	0	1	1	0
macs2_2.9e9_plus_peak_895	chr1	14523655	14524329	+	675	5	18	6	8	8	7	6	11	1	3	1	5
macs2_2.9e9_plus_peak_896	chr1	14538762	14539048	+	287	5	3	8	3	0	0	1	2	0	0	0	0
macs2_2.9e9_plus_peak_897	chr1	14543293	14543492	+	200	3	2	2	0	0	1	1	0	0	0	1	0
macs2_2.9e9_plus_peak_898	chr1	14551417	14551618	+	202	3	3	0	0	2	0	3	0	0	0	0	0
macs2_2.9e9_plus_peak_899	chr1	14576857	14577089	+	233	13	8	6	6	2	0	5	6	1	0	0	3
macs2_2.9e9_plus_peak_900	chr1	14577224	14577450	+	227	6	6	8	7	4	4	3	4	1	5	3	1
macs2_2.9e9_plus_peak_901	chr1	14579406	14579661	+	256	5	8	0	2	1	3	0	2	1	1	0	0
macs2_2.9e9_plus_peak_902	chr1	14593756	14593990	+	235	1	5	9	2	2	1	3	0	4	0	0	1
macs2_2.9e9_plus_peak_903	chr1	14594708	14595023	+	316	3	6	1	6	0	1	0	2	0	1	0	0
macs2_2.9e9_plus_peak_904	chr1	14599219	14599421	+	203	1	1	3	2	0	0	1	1	1	0	0	0
macs2_2.9e9_plus_peak_905	chr1	14604516	14604715	+	200	1	1	0	1	1	1	1	1	0	0	0	0
macs2_2.9e9_plus_peak_906	chr1	14619942	14620209	+	268	8	2	1	2	3	0	0	1	0	3	1	0
macs2_2.9e9_plus_peak_907	chr1	14655095	14655313	+	219	1	6	1	5	0	1	1	1	0	0	0	0
macs2_2.9e9_plus_peak_908	chr1	14658084	14658283	+	200	1	2	4	0	1	0	1	2	0	0	0	0
macs2_2.9e9_plus_peak_909	chr1	14664244	14664555	+	312	3	2	3	3	1	0	3	4	2	2	1	1
macs2_2.9e9_plus_peak_910	chr1	14665255	14665643	+	389	5	6	0	8	1	2	4	1	0	0	0	0
macs2_2.9e9_plus_peak_911	chr1	14670979	14671187	+	209	3	3	2	2	0	0	6	1	5	1	0	1
macs2_2.9e9_plus_peak_912	chr1	14675435	14675649	+	215	4	4	2	2	2	1	2	1	1	0	1	0
macs2_2.9e9_plus_peak_913	chr1	14679469	14679792	+	324	0	3	1	1	0	1	0	1	1	1	0	0
macs2_2.9e9_plus_peak_914	chr1	14697973	14698203	+	231	5	2	1	0	1	3	2	0	1	0	0	0
macs2_2.9e9_plus_peak_915	chr1	14707052	14707299	+	248	2	5	0	1	0	3	0	1	0	0	0	0
macs2_2.9e9_plus_peak_916	chr1	14714800	14715001	+	202	5	1	0	2	2	3	1	0	2	1	1	0
macs2_2.9e9_plus_peak_917	chr1	14716385	14716586	+	202	2	0	2	0	0	2	0	3	0	0	0	0
macs2_2.9e9_plus_peak_918	chr1	14720148	14720415	+	268	5	1	1	4	1	3	3	3	0	1	0	0
macs2_2.9e9_plus_peak_919	chr1	14724214	14724453	+	240	4	4	4	7	2	1	4	2	0	0	0	0
macs2_2.9e9_plus_peak_920	chr1	14739975	14740194	+	220	1	2	1	0	1	2	2	0	1	1	0	2
macs2_2.9e9_plus_peak_921	chr1	14743585	14743790	+	206	1	1	7	2	2	3	1	0	0	2	1	0
macs2_2.9e9_plus_peak_922	chr1	14744460	14744681	+	222	7	14	9	9	3	8	1	3	3	11	2	0
macs2_2.9e9_plus_peak_923	chr1	14756582	14756793	+	212	2	1	2	3	1	1	0	2	2	1	3	0
macs2_2.9e9_plus_peak_924	chr1	14764456	14764692	+	237	3	3	4	1	4	1	0	1	0	0	0	0
macs2_2.9e9_plus_peak_925	chr1	14777990	14778190	+	201	0	3	1	2	2	3	0	0	0	2	0	0
macs2_2.9e9_plus_peak_926	chr1	14793038	14793238	+	201	1	2	2	4	0	1	0	1	0	0	0	0
macs2_2.9e9_plus_peak_927	chr1	14799983	14800232	+	250	1	2	4	3	1	2	0	2	0	0	0	0
macs2_2.9e9_plus_peak_928	chr1	14815513	14815719	+	207	1	3	4	5	2	0	3	0	0	0	0	0
macs2_2.9e9_plus_peak_929	chr1	14823181	14823414	+	234	3	5	3	0	0	3	1	3	0	0	0	0
macs2_2.9e9_plus_peak_930	chr1	14825055	14825298	+	244	9	6	3	1	3	3	2	0	0	0	5	1
macs2_2.9e9_plus_peak_931	chr1	14836800	14837000	+	201	1	3	2	1	0	0	1	1	0	0	0	0
macs2_2.9e9_plus_peak_932	chr1	14926368	14926567	+	200	5	2	1	5	0	1	0	0	5	5	2	4
macs2_2.9e9_plus_peak_933	chr1	14926798	14927306	+	509	244	226	126	164	74	99	87	93	160	143	149	149
macs2_2.9e9_plus_peak_934	chr1	14931963	14932193	+	231	5	2	4	1	0	2	3	1	5	2	4	4
macs2_2.9e9_plus_peak_935	chr1	14935015	14935263	+	249	4	3	1	4	0	1	4	6	8	4	4	4
macs2_2.9e9_plus_peak_936	chr1	14937905	14938304	+	400	24	21	22	21	12	24	5	15	24	16	19	26
macs2_2.9e9_plus_peak_937	chr1	14942011	14942234	+	224	4	11	8	6	4	4	5	8	10	5	14	8
macs2_2.9e9_plus_peak_938	chr1	14942711	14943114	+	404	21	9	11	11	6	9	9	9	21	7	26	18
macs2_2.9e9_plus_peak_939	chr1	14943685	14944138	+	454	8	12	4	6	2	2	3	0	9	8	9	12
macs2_2.9e9_plus_peak_940	chr1	14949048	14949299	+	252	10	12	1	9	0	4	4	5	4	4	3	7
macs2_2.9e9_plus_peak_941	chr1	14950775	14951188	+	414	6	10	10	3	3	3	1	5	5	4	2	4
macs2_2.9e9_plus_peak_942	chr1	14958147	14958429	+	283	4	5	5	2	0	4	2	0	1	1	2	2
macs2_2.9e9_plus_peak_943	chr1	14964068	14964370	+	303	45	25	15	30	13	20	15	12	16	7	23	11
macs2_2.9e9_plus_peak_944	chr1	14964925	14965176	+	252	2	8	8	5	3	4	7	6	4	2	2	5
macs2_2.9e9_plus_peak_945	chr1	14966566	14966782	+	217	7	2	5	1	2	3	2	5	8	2	4	6
macs2_2.9e9_plus_peak_946	chr1	14974434	14974669	+	236	1	1	2	2	2	5	1	0	1	0	2	0
macs2_2.9e9_plus_peak_947	chr1	14976944	14977151	+	208	1	0	0	4	2	1	0	1	1	3	1	4
macs2_2.9e9_plus_peak_948	chr1	14979605	14979814	+	210	4	4	2	2	2	1	0	1	2	3	1	4
macs2_2.9e9_plus_peak_949	chr1	14980640	14980889	+	250	5	5	4	2	1	1	3	2	2	1	5	0
macs2_2.9e9_plus_peak_950	chr1	14985591	14985844	+	254	5	4	4	7	1	3	1	2	1	4	2	3
macs2_2.9e9_plus_peak_951	chr1	14986129	14986492	+	364	12	21	15	12	4	3	3	5	10	2	4	7
macs2_2.9e9_plus_peak_952	chr1	14989947	14990214	+	268	14	11	8	13	4	4	4	7	8	6	8	12
macs2_2.9e9_plus_peak_953	chr1	14992072	14992595	+	524	31	42	26	41	10	17	18	22	25	18	11	18
macs2_2.9e9_plus_peak_954	chr1	14994046	14994414	+	369	33	14	22	16	11	15	8	12	17	6	13	16
macs2_2.9e9_plus_peak_955	chr1	14996158	14996366	+	209	6	8	2	11	5	3	1	4	7	3	1	4
macs2_2.9e9_plus_peak_956	chr1	15005942	15006148	+	207	4	1	0	1	2	1	1	0	0	5	2	1
macs2_2.9e9_plus_peak_957	chr1	15007253	15007590	+	338	3	7	0	5	4	6	1	2	1	2	1	3
macs2_2.9e9_plus_peak_958	chr1	15015535	15015734	+	200	3	1	2	0	0	0	0	0	0	0	1	0
macs2_2.9e9_plus_peak_959	chr1	15015995	15016247	+	253	5	5	6	4	1	3	4	0	0	0	0	5
macs2_2.9e9_plus_peak_960	chr1	15023360	15023972	+	613	47	49	28	44	12	32	12	19	12	17	27	16
macs2_2.9e9_plus_peak_961	chr1	15030254	15030504	+	251	13	13	13	10	6	9	8	7	17	8	12	5
macs2_2.9e9_plus_peak_962	chr1	15032833	15033109	+	277	22	11	11	8	3	3	4	5	4	2	8	4
macs2_2.9e9_plus_peak_963	chr1	15037599	15037894	+	296	4	6	5	10	4	2	3	2	0	1	1	3
macs2_2.9e9_plus_peak_964	chr1	15040050	15040539	+	490	28	44	20	27	11	10	10	11	8	6	9	13
macs2_2.9e9_plus_peak_965	chr1	15040713	15041030	+	318	13	15	4	5	11	3	3	4	5	12	5	1
macs2_2.9e9_plus_peak_966	chr1	15048513	15048760	+	248	1	6	3	1	1	1	1	4	1	3	0	1
macs2_2.9e9_plus_peak_967	chr1	15048961	15049222	+	262	3	1	1	6	1	0	0	2	3	2	1	2
macs2_2.9e9_plus_peak_968	chr1	15054686	15054911	+	226	12	5	5	4	0	7	0	1	4	0	5	1
macs2_2.9e9_plus_peak_969	chr1	15063103	15063320	+	218	8	3	2	5	1	2	2	1	0	0	0	1
macs2_2.9e9_plus_peak_970	chr1	15063736	15063946	+	211	3	1	0	3	0	2	1	0	0	0	1	0
macs2_2.9e9_plus_peak_971	chr1	15071528	15071877	+	350	9	5	8	11	0	3	5	4	2	2	4	3
macs2_2.9e9_plus_peak_972	chr1	15076755	15077219	+	465	15	15	9	16	7	3	4	5	6	1	10	3
macs2_2.9e9_plus_peak_973	chr1	15079879	15080115	+	237	5	3	2	5	0	0	2	1	2	0	0	0
macs2_2.9e9_plus_peak_974	chr1	15085185	15085541	+	357	23	43	20	29	7	18	12	21	7	7	12	13
macs2_2.9e9_plus_peak_975	chr1	15092686	15093084	+	399	6	6	1	5	4	4	5	4	4	0	1	2
macs2_2.9e9_plus_peak_976	chr1	15094475	15094803	+	329	3	6	4	6	0	5	1	0	1	0	1	3
macs2_2.9e9_plus_peak_977	chr1	15098908	15099107	+	200	1	1	1	1	0	1	0	1	1	2	0	5
macs2_2.9e9_plus_peak_978	chr1	15103205	15103527	+	323	32	11	9	11	4	7	5	8	2	3	4	5
macs2_2.9e9_plus_peak_979	chr1	15104705	15105014	+	310	12	14	5	5	4	6	2	1	2	3	5	2
macs2_2.9e9_plus_peak_980	chr1	15108952	15109159	+	208	7	10	7	9	4	7	3	3	8	1	4	3
macs2_2.9e9_plus_peak_981	chr1	15116003	15116382	+	380	36	36	26	29	21	22	10	15	12	6	12	3
macs2_2.9e9_plus_peak_982	chr1	15127394	15127674	+	281	42	61	19	30	14	19	6	8	7	7	2	9
macs2_2.9e9_plus_peak_983	chr1	15134143	15134383	+	241	2	1	0	0	0	0	1	1	0	1	1	0
macs2_2.9e9_plus_peak_984	chr1	15144128	15144348	+	221	3	2	2	0	1	0	2	0	0	0	2	1
macs2_2.9e9_plus_peak_985	chr1	15149974	15150241	+	268	4	6	0	3	2	0	1	4	1	2	0	1
macs2_2.9e9_plus_peak_986	chr1	15150518	15150889	+	372	4	5	6	4	0	2	2	4	0	0	1	0
macs2_2.9e9_plus_peak_987	chr1	15158947	15159253	+	307	9	15	6	10	3	8	3	7	2	2	3	1
macs2_2.9e9_plus_peak_988	chr1	15167761	15167965	+	205	0	4	2	4	0	0	1	1	4	0	0	0
macs2_2.9e9_plus_peak_989	chr1	15169663	15169869	+	207	4	1	1	0	1	2	1	0	1	0	0	1
macs2_2.9e9_plus_peak_990	chr1	15172734	15173117	+	384	3	11	4	3	2	3	0	10	3	0	2	1
macs2_2.9e9_plus_peak_991	chr1	15199626	15199825	+	200	2	4	4	5	2	0	0	0	0	0	0	0
macs2_2.9e9_plus_peak_992	chr1	15201753	15202116	+	364	37	40	13	45	10	17	19	17	9	8	9	6
macs2_2.9e9_plus_peak_993	chr1	15209720	15209983	+	264	7	4	5	1	3	1	0	1	0	0	2	2
macs2_2.9e9_plus_peak_994	chr1	15214379	15214578	+	200	3	1	1	1	0	1	2	0	0	0	0	0
macs2_2.9e9_plus_peak_995	chr1	15219205	15219456	+	252	0	2	2	4	0	1	1	0	0	1	0	0
macs2_2.9e9_plus_peak_996	chr1	15230560	15230897	+	338	8	4	9	3	0	0	0	3	1	2	1	0
macs2_2.9e9_plus_peak_997	chr1	15233793	15233999	+	207	3	0	2	4	0	4	1	2	0	1	0	1
macs2_2.9e9_plus_peak_998	chr1	15234928	15235127	+	200	1	2	3	2	1	1	1	1	0	0	0	1
macs2_2.9e9_plus_peak_999	chr1	15243163	15243502	+	340	3	4	1	0	1	4	2	3	0	0	0	1
macs2_2.9e9_plus_peak_1000	chr1	15254835	15255065	+	231	4	4	1	3	0	1	2	3	4	9	11	4
macs2_2.9e9_plus_peak_1001	chr1	15257649	15257935	+	287	4	1	2	0	1	0	2	1	2	5	4	8
macs2_2.9e9_plus_peak_1002	chr1	15260040	15260244	+	205	0	0	0	1	1	1	0	0	7	2	1	5
macs2_2.9e9_plus_peak_1003	chr1	15270475	15270846	+	372	24	20	19	29	23	13	18	8	58	38	70	41
macs2_2.9e9_plus_peak_1004	chr1	15275685	15275914	+	230	5	4	4	5	2	5	2	3	12	8	9	2
macs2_2.9e9_plus_peak_1005	chr1	15277834	15278060	+	227	6	1	0	2	4	1	0	0	6	4	5	2
macs2_2.9e9_plus_peak_1006	chr1	15282535	15282928	+	394	10	9	18	16	11	7	10	9	30	20	21	18
macs2_2.9e9_plus_peak_1007	chr1	15283014	15283230	+	217	3	2	0	0	1	1	0	5	3	5	3	4
macs2_2.9e9_plus_peak_1008	chr1	15288022	15288348	+	327	1	0	14	9	8	2	8	6	22	16	18	15
macs2_2.9e9_plus_peak_1009	chr1	15290540	15290740	+	201	0	0	0	0	0	0	0	0	8	4	3	5
macs2_2.9e9_plus_peak_1010	chr1	15292281	15292521	+	241	1	2	0	2	0	1	1	1	7	4	4	4
macs2_2.9e9_plus_peak_1011	chr1	15297803	15298034	+	232	6	11	1	8	10	3	2	6	7	15	9	12
macs2_2.9e9_plus_peak_1012	chr1	15300090	15300346	+	257	7	7	4	11	7	4	0	1	4	7	10	13
macs2_2.9e9_plus_peak_1013	chr1	15301338	15301551	+	214	0	1	4	3	3	1	1	4	7	8	13	19
macs2_2.9e9_plus_peak_1014	chr1	15307664	15307942	+	279	0	1	3	4	2	2	2	0	8	21	10	10
macs2_2.9e9_plus_peak_1015	chr1	15310754	15310964	+	211	4	3	0	2	2	2	0	0	2	0	2	1
macs2_2.9e9_plus_peak_1016	chr1	15317728	15317939	+	212	4	1	1	1	2	3	0	2	0	1	0	1
macs2_2.9e9_plus_peak_1017	chr1	15319608	15319807	+	200	0	1	3	3	2	3	0	5	2	2	3	1
macs2_2.9e9_plus_peak_1018	chr1	15327726	15328025	+	300	3	5	0	3	3	2	1	0	2	3	1	3
macs2_2.9e9_plus_peak_1019	chr1	15329897	15330113	+	217	2	5	2	2	2	0	0	1	2	1	3	1
macs2_2.9e9_plus_peak_1020	chr1	15332167	15332377	+	211	2	5	0	2	1	1	1	0	0	0	0	2
macs2_2.9e9_plus_peak_1021	chr1	15339308	15339531	+	224	2	5	4	1	3	1	1	0	0	0	3	0
macs2_2.9e9_plus_peak_1022	chr1	15339757	15340018	+	262	3	7	0	3	3	1	2	0	3	3	4	1
macs2_2.9e9_plus_peak_1023	chr1	15344905	15345128	+	224	1	2	2	6	0	1	2	0	0	0	0	1
macs2_2.9e9_plus_peak_1024	chr1	15350673	15351004	+	332	2	2	0	2	1	1	2	0	0	0	0	1
macs2_2.9e9_plus_peak_1025	chr1	15352405	15352605	+	201	3	1	1	1	0	2	2	0	1	0	0	0
macs2_2.9e9_plus_peak_1026	chr1	15353104	15353303	+	200	1	2	2	0	1	0	1	0	3	0	0	1
macs2_2.9e9_plus_peak_1027	chr1	15358057	15358282	+	226	3	5	1	3	1	0	2	1	0	0	0	0
macs2_2.9e9_plus_peak_1028	chr1	15372659	15372879	+	221	4	3	0	1	2	0	0	1	0	0	0	0
macs2_2.9e9_plus_peak_1029	chr1	15381064	15381271	+	208	0	3	0	3	1	0	1	0	3	1	1	0
macs2_2.9e9_plus_peak_1030	chr1	15386739	15386946	+	208	14	6	1	1	1	2	2	0	0	2	1	0
macs2_2.9e9_plus_peak_1031	chr1	15387444	15387736	+	293	8	3	3	9	7	2	3	5	1	0	0	0
macs2_2.9e9_plus_peak_1032	chr1	15390056	15390535	+	480	40	29	9	15	9	10	12	17	2	6	1	5
macs2_2.9e9_plus_peak_1033	chr1	15392522	15393182	+	661	108	73	51	46	20	19	31	31	19	10	10	14
macs2_2.9e9_plus_peak_1034	chr1	15394580	15394784	+	205	16	23	9	8	5	6	5	10	3	4	3	0
macs2_2.9e9_plus_peak_1035	chr1	15444434	15444672	+	239	3	1	0	1	2	2	0	2	4	6	0	1
macs2_2.9e9_plus_peak_1036	chr1	15485549	15485772	+	224	2	1	0	2	1	1	1	4	2	3	0	2
macs2_2.9e9_plus_peak_1037	chr1	15491710	15491916	+	207	0	2	3	3	1	5	2	2	3	4	8	5
macs2_2.9e9_plus_peak_1038	chr1	15493080	15493351	+	272	4	4	2	7	5	3	2	6	14	6	14	7
macs2_2.9e9_plus_peak_1039	chr1	15498638	15499101	+	464	2	6	0	4	3	5	1	3	5	6	4	10
macs2_2.9e9_plus_peak_1040	chr1	15500021	15500301	+	281	4	3	7	0	3	7	2	4	13	4	6	7
macs2_2.9e9_plus_peak_1041	chr1	15524170	15524577	+	408	13	8	4	10	4	10	2	2	11	7	7	12
macs2_2.9e9_plus_peak_1042	chr1	15526664	15526980	+	317	1	2	0	1	1	3	3	1	3	1	4	1
macs2_2.9e9_plus_peak_1043	chr1	15532600	15532854	+	255	1	5	3	2	1	2	1	8	6	5	10	4
macs2_2.9e9_plus_peak_1044	chr1	15546521	15547108	+	588	71	83	43	61	36	48	34	39	71	59	60	66
macs2_2.9e9_plus_peak_1045	chr1	15564634	15564842	+	209	4	2	3	0	2	2	0	1	2	2	0	6
macs2_2.9e9_plus_peak_1046	chr1	15565951	15566192	+	242	6	9	1	3	2	1	1	4	2	2	5	6
macs2_2.9e9_plus_peak_1047	chr1	15566983	15567194	+	212	2	1	7	2	1	5	1	1	4	4	2	0
macs2_2.9e9_plus_peak_1048	chr1	15579973	15580335	+	363	4	4	4	1	1	3	4	1	4	6	3	4
macs2_2.9e9_plus_peak_1049	chr1	15581362	15581944	+	583	4	15	3	7	5	2	2	2	9	2	8	11
macs2_2.9e9_plus_peak_1050	chr1	15588182	15588420	+	239	2	1	0	1	0	2	0	5	1	2	1	2
macs2_2.9e9_plus_peak_1051	chr1	15590766	15591079	+	314	0	0	0	0	2	0	0	0	6	5	2	5
macs2_2.9e9_plus_peak_1052	chr1	15592397	15592739	+	343	3	3	4	4	0	2	0	3	3	3	2	1
macs2_2.9e9_plus_peak_1053	chr1	15598117	15598506	+	390	3	1	0	3	1	1	2	2	4	0	1	0
macs2_2.9e9_plus_peak_1054	chr1	15605726	15606184	+	459	38	22	8	14	7	12	9	7	43	16	32	17
macs2_2.9e9_plus_peak_1055	chr1	15608120	15608357	+	238	5	7	3	4	1	3	4	3	8	3	11	5
macs2_2.9e9_plus_peak_1056	chr1	15611239	15611493	+	255	5	5	1	2	3	5	1	0	3	1	6	2
macs2_2.9e9_plus_peak_1057	chr1	15616191	15616410	+	220	6	4	2	2	0	2	2	1	3	2	2	2
macs2_2.9e9_plus_peak_1058	chr1	15619352	15619605	+	254	6	6	3	6	2	5	4	3	4	3	2	6
macs2_2.9e9_plus_peak_1059	chr1	15625435	15625800	+	366	2	2	0	5	0	4	2	5	0	3	5	2
macs2_2.9e9_plus_peak_1060	chr1	15630252	15630475	+	224	7	7	0	6	2	5	3	3	9	3	8	5
macs2_2.9e9_plus_peak_1061	chr1	15635762	15636045	+	284	3	3	4	2	3	4	2	1	4	1	3	0
macs2_2.9e9_plus_peak_1062	chr1	15637357	15637568	+	212	2	4	1	1	0	2	2	0	0	0	0	1
macs2_2.9e9_plus_peak_1063	chr1	15643745	15644018	+	274	6	7	2	3	0	2	2	1	1	6	2	2
macs2_2.9e9_plus_peak_1064	chr1	15646648	15647007	+	360	8	4	2	3	1	1	1	7	4	1	6	6
macs2_2.9e9_plus_peak_1065	chr1	15655497	15655814	+	318	16	7	8	5	1	3	4	12	13	6	7	10
macs2_2.9e9_plus_peak_1066	chr1	15655956	15656536	+	581	14	19	13	10	5	7	5	11	18	9	21	12
macs2_2.9e9_plus_peak_1067	chr1	15661625	15662003	+	379	11	5	7	0	1	3	1	3	2	4	3	1
macs2_2.9e9_plus_peak_1068	chr1	15668332	15668535	+	204	4	3	1	1	0	2	0	3	0	2	1	1
macs2_2.9e9_plus_peak_1069	chr1	15671605	15671809	+	205	5	5	0	0	0	3	2	2	2	5	3	1
macs2_2.9e9_plus_peak_1070	chr1	15671965	15672204	+	240	2	9	1	0	2	1	1	1	3	5	1	2
macs2_2.9e9_plus_peak_1071	chr1	15675586	15675799	+	214	3	6	7	2	3	2	0	2	2	3	1	1
macs2_2.9e9_plus_peak_1072	chr1	15693989	15694200	+	212	2	4	5	1	1	1	0	1	2	1	0	0
macs2_2.9e9_plus_peak_1073	chr1	15715777	15716051	+	275	4	4	0	0	0	0	0	0	2	1	3	6
macs2_2.9e9_plus_peak_1074	chr1	15723936	15724135	+	200	2	3	0	1	4	0	4	1	0	1	1	0
macs2_2.9e9_plus_peak_1075	chr1	15724695	15724916	+	222	4	1	2	1	0	2	0	0	2	5	1	1
macs2_2.9e9_plus_peak_1076	chr1	15753690	15753945	+	256	24	19	23	22	10	17	10	12	24	19	18	13
macs2_2.9e9_plus_peak_1077	chr1	15755123	15755485	+	363	35	37	53	65	26	44	28	41	48	26	44	33
macs2_2.9e9_plus_peak_1078	chr1	15756385	15756966	+	582	161	127	125	143	65	96	67	91	154	116	118	109
macs2_2.9e9_plus_peak_1079	chr1	15785299	15785604	+	306	80	85	56	52	19	51	40	51	84	68	34	45
macs2_2.9e9_plus_peak_1080	chr1	15832861	15833067	+	207	5	5	8	7	5	9	5	5	6	4	8	2
macs2_2.9e9_plus_peak_1081	chr1	15853369	15853591	+	223	25	9	4	10	10	6	3	6	18	10	13	3
macs2_2.9e9_plus_peak_1082	chr1	15855615	15855954	+	340	13	9	9	3	5	3	2	4	7	11	12	3
macs2_2.9e9_plus_peak_1083	chr1	15856086	15856288	+	203	3	1	3	2	1	1	1	1	3	1	5	1
macs2_2.9e9_plus_peak_1084	chr1	15856444	15856873	+	430	5	3	2	4	8	6	1	7	3	3	4	6
macs2_2.9e9_plus_peak_1085	chr1	15861111	15861354	+	244	5	8	9	19	3	6	2	5	5	4	7	9
macs2_2.9e9_plus_peak_1086	chr1	15866686	15866886	+	201	1	4	1	1	1	2	1	0	1	4	1	0
macs2_2.9e9_plus_peak_1087	chr1	15868662	15868920	+	259	12	3	2	1	1	5	5	3	2	5	8	0
macs2_2.9e9_plus_peak_1088	chr1	15870038	15870249	+	212	1	4	1	1	1	1	2	0	3	1	3	4
macs2_2.9e9_plus_peak_1089	chr1	15876166	15876414	+	249	5	4	4	5	2	3	1	2	1	3	0	2
macs2_2.9e9_plus_peak_1090	chr1	15880592	15880819	+	228	2	3	0	2	2	0	0	1	2	1	2	2
macs2_2.9e9_plus_peak_1091	chr1	15881594	15881846	+	253	1	2	3	1	4	3	2	3	2	0	1	2
macs2_2.9e9_plus_peak_1092	chr1	15886899	15887248	+	350	4	6	4	8	2	1	2	1	3	1	7	2
macs2_2.9e9_plus_peak_1093	chr1	15897178	15898355	+	1178	394	443	118	202	112	151	109	139	212	225	232	238
macs2_2.9e9_plus_peak_1094	chr1	15917916	15918133	+	218	2	1	3	1	1	0	4	2	1	1	4	1
macs2_2.9e9_plus_peak_1095	chr1	15929260	15929598	+	339	6	3	8	3	5	10	5	7	9	6	7	6
macs2_2.9e9_plus_peak_1096	chr1	15931614	15931972	+	359	66	94	104	73	46	71	51	67	109	81	111	64
macs2_2.9e9_plus_peak_1097	chr1	15952737	15952975	+	239	0	1	5	1	0	2	1	4	8	5	2	1
macs2_2.9e9_plus_peak_1098	chr1	15961576	15961927	+	352	26	32	31	28	21	24	19	19	25	21	18	22
macs2_2.9e9_plus_peak_1099	chr1	15962834	15963100	+	267	12	17	6	22	10	13	4	10	18	7	14	8
macs2_2.9e9_plus_peak_1100	chr1	15968347	15968593	+	247	11	10	12	12	0	4	6	4	8	4	5	9
macs2_2.9e9_plus_peak_1101	chr1	15972219	15972497	+	279	16	21	18	27	9	16	12	13	26	11	17	20
macs2_2.9e9_plus_peak_1102	chr1	15975219	15975462	+	244	4	3	3	9	6	3	2	3	7	3	4	2
macs2_2.9e9_plus_peak_1103	chr1	15979208	15979423	+	216	19	9	30	13	7	12	5	7	23	8	12	10
macs2_2.9e9_plus_peak_1104	chr1	15980772	15981247	+	476	50	36	35	25	15	15	14	25	24	11	11	22
macs2_2.9e9_plus_peak_1105	chr1	15981951	15982514	+	564	50	39	39	38	26	25	26	31	46	17	29	27
macs2_2.9e9_plus_peak_1106	chr1	15985155	15985380	+	226	12	14	9	10	14	7	5	10	28	8	10	7
macs2_2.9e9_plus_peak_1107	chr1	15988394	15988848	+	455	26	25	30	16	17	14	11	17	18	18	11	22
macs2_2.9e9_plus_peak_1108	chr1	15990665	15991045	+	381	89	65	89	101	80	72	55	75	138	100	104	69
macs2_2.9e9_plus_peak_1109	chr1	15991594	15991872	+	279	65	55	32	48	44	39	23	33	64	40	63	43
macs2_2.9e9_plus_peak_1110	chr1	15993455	15993817	+	363	45	28	32	33	33	22	21	22	39	23	37	32
macs2_2.9e9_plus_peak_1111	chr1	15995163	15995658	+	496	123	125	92	112	59	71	46	78	132	134	65	89
macs2_2.9e9_plus_peak_1112	chr1	16011622	16012192	+	571	82	64	47	44	28	44	35	30	61	43	33	33
macs2_2.9e9_plus_peak_1113	chr1	16026378	16026597	+	220	5	1	1	1	1	4	0	2	1	3	3	1
macs2_2.9e9_plus_peak_1114	chr1	16028041	16028376	+	336	2	2	1	0	0	3	0	0	0	2	2	1
macs2_2.9e9_plus_peak_1115	chr1	16036687	16036958	+	272	4	1	1	2	1	1	0	0	2	8	1	0
macs2_2.9e9_plus_peak_1116	chr1	16037664	16037865	+	202	2	4	4	3	0	0	0	0	3	1	0	1
macs2_2.9e9_plus_peak_1117	chr1	16040727	16040935	+	209	9	8	9	14	9	6	4	4	4	4	2	9
macs2_2.9e9_plus_peak_1118	chr1	16045810	16046059	+	250	13	10	19	7	7	7	12	5	10	13	8	11
macs2_2.9e9_plus_peak_1119	chr1	16049723	16050347	+	625	38	48	32	25	22	27	19	25	44	27	25	28
macs2_2.9e9_plus_peak_1120	chr1	16050885	16051095	+	211	4	12	5	8	6	2	11	5	9	3	6	3
macs2_2.9e9_plus_peak_1121	chr1	16051892	16052190	+	299	67	55	36	70	29	35	44	37	43	50	63	39
macs2_2.9e9_plus_peak_1122	chr1	16056827	16057045	+	219	16	20	23	23	15	17	7	13	16	8	14	13
macs2_2.9e9_plus_peak_1123	chr1	16060746	16061406	+	661	623	614	527	538	275	429	275	362	681	421	505	426
macs2_2.9e9_plus_peak_1124	chr1	16081453	16081654	+	202	0	2	2	2	1	1	1	1	3	0	2	0
macs2_2.9e9_plus_peak_1125	chr1	16086865	16087124	+	260	0	6	1	2	1	3	1	1	3	2	3	0
macs2_2.9e9_plus_peak_1126	chr1	16100085	16100290	+	206	3	4	2	3	2	2	5	0	7	2	0	0
macs2_2.9e9_plus_peak_1127	chr1	16101659	16102089	+	431	5	3	3	2	2	2	3	2	2	0	3	0
macs2_2.9e9_plus_peak_1128	chr1	16103275	16103492	+	218	6	10	4	8	3	6	2	4	8	4	8	3
macs2_2.9e9_plus_peak_1129	chr1	16111564	16111959	+	396	16	6	11	10	17	11	7	15	18	12	12	12
macs2_2.9e9_plus_peak_1130	chr1	16112718	16113214	+	497	21	35	48	43	24	35	24	30	70	46	57	52
macs2_2.9e9_plus_peak_1131	chr1	16120114	16120313	+	200	3	1	0	0	2	3	0	0	0	0	2	1
macs2_2.9e9_plus_peak_1132	chr1	16122703	16122911	+	209	0	1	3	4	1	1	1	1	5	0	0	2
macs2_2.9e9_plus_peak_1133	chr1	16154920	16155390	+	471	12	9	12	8	2	12	10	9	18	12	9	6
macs2_2.9e9_plus_peak_1134	chr1	16163296	16163502	+	207	6	3	18	9	2	4	4	5	9	5	8	5
macs2_2.9e9_plus_peak_1135	chr1	16165105	16165656	+	552	25	26	54	60	41	45	29	23	34	24	49	36
macs2_2.9e9_plus_peak_1136	chr1	16168528	16168757	+	230	9	13	23	20	9	10	6	8	3	7	5	15
macs2_2.9e9_plus_peak_1137	chr1	16170380	16170697	+	318	17	12	35	33	6	5	4	8	10	1	5	27
macs2_2.9e9_plus_peak_1138	chr1	16172239	16172458	+	220	11	20	11	13	9	8	22	16	22	12	15	21
macs2_2.9e9_plus_peak_1139	chr1	16173035	16173236	+	202	7	9	7	9	2	0	2	5	9	1	2	3
macs2_2.9e9_plus_peak_1140	chr1	16175268	16175693	+	426	19	13	30	22	10	12	12	15	15	4	5	8
macs2_2.9e9_plus_peak_1141	chr1	16178714	16179049	+	336	15	9	14	11	2	8	6	6	14	2	8	8
macs2_2.9e9_plus_peak_1142	chr1	16185164	16185363	+	200	0	2	2	0	2	2	1	0	3	0	4	4
macs2_2.9e9_plus_peak_1143	chr1	16190335	16190682	+	348	2	3	1	3	1	1	1	2	1	1	2	2
macs2_2.9e9_plus_peak_1144	chr1	16198622	16198825	+	204	2	3	5	1	3	2	3	0	6	3	1	6
macs2_2.9e9_plus_peak_1145	chr1	16200131	16200370	+	240	2	1	2	6	0	4	3	1	2	0	1	1
macs2_2.9e9_plus_peak_1146	chr1	16205366	16205663	+	298	22	28	26	19	16	19	18	20	36	19	27	18
macs2_2.9e9_plus_peak_1147	chr1	16205767	16206190	+	424	44	35	21	33	20	19	19	14	29	26	27	25
macs2_2.9e9_plus_peak_1148	chr1	16214081	16214369	+	289	50	59	36	63	21	37	28	22	54	33	35	41
macs2_2.9e9_plus_peak_1149	chr1	16219827	16220339	+	513	18	15	8	13	1	6	12	6	7	18	9	8
macs2_2.9e9_plus_peak_1150	chr1	16226287	16226492	+	206	8	9	3	8	4	4	7	2	9	13	0	11
macs2_2.9e9_plus_peak_1151	chr1	16227454	16228196	+	743	44	35	37	26	10	14	25	26	37	15	28	24
macs2_2.9e9_plus_peak_1152	chr1	16228834	16229259	+	426	46	32	21	24	24	18	16	23	36	31	62	30
macs2_2.9e9_plus_peak_1153	chr1	16236513	16236727	+	215	18	10	13	19	12	10	16	11	7	14	13	11
macs2_2.9e9_plus_peak_1154	chr1	16238359	16238594	+	236	40	40	25	32	21	17	13	11	13	15	11	15
macs2_2.9e9_plus_peak_1155	chr1	16238679	16239127	+	449	63	64	42	44	35	33	51	16	51	28	35	36
macs2_2.9e9_plus_peak_1156	chr1	16240221	16240454	+	234	10	10	7	12	6	1	7	7	12	3	10	6
macs2_2.9e9_plus_peak_1157	chr1	16241149	16241412	+	264	14	14	5	12	2	9	12	5	1	8	8	10
macs2_2.9e9_plus_peak_1158	chr1	16245941	16246208	+	268	30	33	23	35	16	19	13	17	27	13	14	30
macs2_2.9e9_plus_peak_1159	chr1	16247384	16247661	+	278	95	104	79	149	55	69	49	85	52	71	67	80
macs2_2.9e9_plus_peak_1160	chr1	16248754	16248986	+	233	89	117	83	148	64	79	52	82	63	79	87	80
macs2_2.9e9_plus_peak_1161	chr1	16249440	16249644	+	205	16	10	8	9	8	10	8	10	14	9	7	8
macs2_2.9e9_plus_peak_1162	chr1	16254683	16255500	+	818	518	359	360	349	221	220	225	215	313	292	368	284
macs2_2.9e9_plus_peak_1163	chr1	16255655	16255958	+	304	48	47	37	33	34	24	23	24	29	27	36	23
macs2_2.9e9_plus_peak_1164	chr1	16256228	16256477	+	250	33	33	25	26	27	19	31	19	31	15	23	30
macs2_2.9e9_plus_peak_1165	chr1	16256939	16257607	+	669	1107	846	771	810	523	523	488	531	733	680	828	680
macs2_2.9e9_plus_peak_1166	chr1	16258468	16258947	+	480	82	77	46	73	43	48	38	49	54	47	55	56
macs2_2.9e9_plus_peak_1167	chr1	16262847	16263241	+	395	27	37	18	25	13	21	16	10	32	18	42	22
macs2_2.9e9_plus_peak_1168	chr1	16266501	16267081	+	581	530	542	462	426	217	329	250	313	410	311	324	400
macs2_2.9e9_plus_peak_1169	chr1	16279498	16279735	+	238	6	2	0	0	1	2	0	2	2	4	1	5
macs2_2.9e9_plus_peak_1170	chr1	16290481	16290680	+	200	0	0	0	0	0	0	0	1	2	4	1	2
macs2_2.9e9_plus_peak_1171	chr1	16360318	16360688	+	371	2	2	1	4	0	0	0	0	1	1	2	1
macs2_2.9e9_plus_peak_1172	chr1	16383576	16383947	+	372	9	15	11	13	4	6	3	7	6	7	16	6
macs2_2.9e9_plus_peak_1173	chr1	16407909	16408118	+	210	2	1	3	3	7	6	1	3	10	4	12	8
macs2_2.9e9_plus_peak_1174	chr1	16443981	16444180	+	200	1	0	1	1	0	0	0	2	0	0	1	2
macs2_2.9e9_plus_peak_1175	chr1	16490488	16490702	+	215	0	0	1	0	0	5	0	1	2	0	0	1
macs2_2.9e9_plus_peak_1176	chr1	16533703	16534005	+	303	1	2	2	4	0	3	2	3	12	4	5	2
macs2_2.9e9_plus_peak_1177	chr1	16679575	16679848	+	274	2	1	3	3	1	0	1	1	2	0	4	3
macs2_2.9e9_plus_peak_1178	chr1	16682016	16682216	+	201	0	3	4	1	0	4	2	1	0	1	3	0
macs2_2.9e9_plus_peak_1179	chr1	16693729	16693984	+	256	10	31	7	27	12	17	15	6	30	24	26	25
macs2_2.9e9_plus_peak_1180	chr1	16700397	16700613	+	217	8	5	3	5	2	5	0	5	6	4	13	9
macs2_2.9e9_plus_peak_1181	chr1	16701154	16701398	+	245	4	3	5	4	2	4	1	2	7	6	5	4
macs2_2.9e9_plus_peak_1182	chr1	16703930	16704208	+	279	20	24	16	19	13	19	10	16	24	13	19	15
macs2_2.9e9_plus_peak_1183	chr1	16707634	16707890	+	257	11	12	11	14	15	9	13	10	18	5	12	10
macs2_2.9e9_plus_peak_1184	chr1	16710599	16710999	+	401	9	11	1	7	5	7	2	4	10	5	4	3
macs2_2.9e9_plus_peak_1185	chr1	16714458	16714658	+	201	3	2	3	4	2	1	1	1	0	2	0	0
macs2_2.9e9_plus_peak_1186	chr1	16721916	16722183	+	268	23	24	36	22	14	11	13	14	21	17	22	17
macs2_2.9e9_plus_peak_1187	chr1	16722583	16722994	+	412	51	36	55	91	36	35	47	36	67	67	55	61
macs2_2.9e9_plus_peak_1188	chr1	16723667	16723974	+	308	18	6	19	16	12	12	16	7	23	13	22	6
macs2_2.9e9_plus_peak_1189	chr1	16724267	16724768	+	502	256	250	310	297	149	281	169	233	365	322	247	258
macs2_2.9e9_plus_peak_1190	chr1	16767756	16768230	+	475	24	14	15	12	8	14	14	16	19	7	19	14
macs2_2.9e9_plus_peak_1191	chr1	16773472	16773671	+	200	0	1	0	0	1	1	0	1	0	0	1	0
macs2_2.9e9_plus_peak_1192	chr1	16779899	16780118	+	220	1	6	3	3	2	2	2	1	1	4	6	4
macs2_2.9e9_plus_peak_1193	chr1	16786177	16786715	+	539	132	117	111	96	32	97	60	74	80	109	69	79
macs2_2.9e9_plus_peak_1194	chr1	16794771	16795051	+	281	3	4	2	1	0	1	0	1	7	4	5	2
macs2_2.9e9_plus_peak_1195	chr1	16828537	16828773	+	237	2	1	2	0	0	0	1	1	2	5	2	1
macs2_2.9e9_plus_peak_1196	chr1	16830230	16830622	+	393	7	5	3	4	0	0	1	3	1	5	0	6
macs2_2.9e9_plus_peak_1197	chr1	16842025	16842392	+	368	16	4	13	13	0	11	5	8	16	12	12	9
macs2_2.9e9_plus_peak_1198	chr1	16848058	16848292	+	235	2	0	1	0	0	1	0	0	2	1	0	1
macs2_2.9e9_plus_peak_1199	chr1	16858100	16858480	+	381	0	0	3	2	1	2	3	6	0	4	2	2
macs2_2.9e9_plus_peak_1200	chr1	16864557	16864840	+	284	4	3	0	4	0	0	1	2	3	2	1	3
macs2_2.9e9_plus_peak_1201	chr1	16875712	16875928	+	217	0	0	0	0	1	0	1	2	0	1	4	2
macs2_2.9e9_plus_peak_1202	chr1	16885912	16886131	+	220	4	1	2	4	1	0	0	0	1	1	0	1
macs2_2.9e9_plus_peak_1203	chr1	16943102	16943303	+	202	0	0	2	3	1	3	1	1	0	1	0	1
macs2_2.9e9_plus_peak_1204	chr1	16976307	16976507	+	201	1	1	1	0	0	2	0	0	0	3	0	0
macs2_2.9e9_plus_peak_1205	chr1	16976609	16977037	+	429	17	33	10	17	12	8	5	8	4	4	9	6
macs2_2.9e9_plus_peak_1206	chr1	16994645	16995053	+	409	0	0	0	0	0	1	0	0	0	0	0	0
macs2_2.9e9_plus_peak_1207	chr1	16998496	16998747	+	252	0	0	0	0	0	0	0	1	0	1	0	1
macs2_2.9e9_plus_peak_1208	chr1	17037959	17038256	+	298	0	6	0	4	0	1	2	2	1	0	5	2
macs2_2.9e9_plus_peak_1209	chr1	17053777	17053985	+	209	4	1	0	1	3	3	1	3	4	1	7	2
macs2_2.9e9_plus_peak_1210	chr1	17054617	17054904	+	288	3	2	2	4	4	2	1	0	0	0	3	1
macs2_2.9e9_plus_peak_1211	chr1	17059068	17059289	+	222	0	0	0	0	0	0	0	0	0	0	0	0
macs2_2.9e9_plus_peak_1212	chr1	17069842	17070168	+	327	0	0	1	0	0	0	0	0	2	0	0	1
macs2_2.9e9_plus_peak_1213	chr1	17072066	17072270	+	205	0	0	0	0	0	0	0	0	0	0	0	0
macs2_2.9e9_plus_peak_1214	chr1	17077721	17077933	+	213	0	0	0	1	0	0	0	1	2	0	2	0
macs2_2.9e9_plus_peak_1215	chr1	17078264	17078563	+	300	0	0	0	0	0	0	0	0	0	0	0	0
macs2_2.9e9_plus_peak_1216	chr1	17186700	17186900	+	201	0	0	0	0	0	0	0	0	0	0	0	0
macs2_2.9e9_plus_peak_1217	chr1	17189214	17189573	+	360	0	2	0	1	2	4	0	4	1	0	3	0
macs2_2.9e9_plus_peak_1218	chr1	17196671	17196887	+	217	0	0	0	0	0	0	0	0	0	0	0	0
macs2_2.9e9_plus_peak_1219	chr1	17200380	17200640	+	261	2	1	2	1	3	1	3	3	4	4	10	6
macs2_2.9e9_plus_peak_1220	chr1	17201964	17202312	+	349	12	6	8	9	11	26	12	10	16	6	16	8
macs2_2.9e9_plus_peak_1221	chr1	17208406	17208622	+	217	1	2	0	1	1	0	0	1	2	1	0	3
macs2_2.9e9_plus_peak_1222	chr1	17223740	17224120	+	381	5	2	1	2	2	1	0	3	2	1	5	4
macs2_2.9e9_plus_peak_1223	chr1	17228733	17228933	+	201	1	0	1	0	0	0	1	1	8	3	0	1
macs2_2.9e9_plus_peak_1224	chr1	17231677	17231896	+	220	23	21	13	21	9	7	3	6	16	20	24	12
macs2_2.9e9_plus_peak_1225	chr1	17236727	17237101	+	375	0	4	8	11	4	5	0	3	7	3	6	6
macs2_2.9e9_plus_peak_1226	chr1	17242029	17242264	+	236	5	2	0	8	0	3	1	0	5	2	5	0
macs2_2.9e9_plus_peak_1227	chr1	17268816	17269031	+	216	3	0	1	0	1	0	0	0	0	0	0	1
macs2_2.9e9_plus_peak_1228	chr1	17282837	17283351	+	515	68	47	47	58	21	28	23	31	63	65	60	59
macs2_2.9e9_plus_peak_1229	chr1	17289601	17289805	+	205	5	1	4	2	1	4	4	1	1	3	5	4
macs2_2.9e9_plus_peak_1230	chr1	17293263	17293678	+	416	12	7	13	4	3	7	1	5	7	7	4	7
macs2_2.9e9_plus_peak_1231	chr1	17299049	17299596	+	548	220	141	193	180	101	118	100	116	280	208	263	188
macs2_2.9e9_plus_peak_1232	chr1	17338802	17339036	+	235	0	2	1	0	0	1	0	4	5	3	0	2
macs2_2.9e9_plus_peak_1233	chr1	17430530	17430898	+	369	3	3	1	0	4	3	1	3	2	1	1	1
macs2_2.9e9_plus_peak_1234	chr1	17456366	17456567	+	202	0	2	2	1	0	1	2	1	1	1	0	0
macs2_2.9e9_plus_peak_1235	chr1	17572391	17572590	+	200	1	0	2	1	0	1	1	0	0	1	1	1
macs2_2.9e9_plus_peak_1236	chr1	17610632	17610847	+	216	6	6	2	5	8	3	0	4	11	2	18	16
macs2_2.9e9_plus_peak_1237	chr1	17677838	17678232	+	395	1	1	2	2	1	5	2	10	2	0	1	0
macs2_2.9e9_plus_peak_1238	chr1	17735236	17735444	+	209	0	5	2	1	0	1	0	3	2	2	4	0
macs2_2.9e9_plus_peak_1239	chr1	17766472	17766770	+	299	7	10	11	10	3	7	5	6	5	7	13	3
macs2_2.9e9_plus_peak_1240	chr1	17770691	17770929	+	239	4	9	4	6	1	6	5	4	5	4	4	2
macs2_2.9e9_plus_peak_1241	chr1	17776159	17776366	+	208	2	1	2	3	0	1	1	1	3	1	1	5
macs2_2.9e9_plus_peak_1242	chr1	17776576	17776782	+	207	3	1	4	2	0	1	1	0	2	3	3	4
macs2_2.9e9_plus_peak_1243	chr1	17778962	17779183	+	222	0	0	2	1	2	2	1	3	1	0	4	3
macs2_2.9e9_plus_peak_1244	chr1	17868501	17868771	+	271	9	8	8	11	7	5	5	8	9	9	6	12
macs2_2.9e9_plus_peak_1245	chr1	17874455	17874922	+	468	5	1	7	5	4	3	1	4	4	3	5	2
macs2_2.9e9_plus_peak_1246	chr1	17877067	17877269	+	203	0	1	2	4	1	1	0	0	2	0	3	1
macs2_2.9e9_plus_peak_1247	chr1	17883249	17884000	+	752	6	10	9	8	8	5	10	9	8	16	6	11
macs2_2.9e9_plus_peak_1248	chr1	17897984	17898190	+	207	2	2	2	3	1	0	2	0	7	2	3	1
macs2_2.9e9_plus_peak_1249	chr1	17907391	17907625	+	235	0	4	0	1	0	4	1	0	3	0	3	0
macs2_2.9e9_plus_peak_1250	chr1	17909456	17909801	+	346	1	2	4	0	1	3	2	2	1	0	7	1
macs2_2.9e9_plus_peak_1251	chr1	17910314	17910529	+	216	3	0	5	2	2	1	2	0	1	1	4	0
macs2_2.9e9_plus_peak_1252	chr1	17924501	17924729	+	229	1	1	2	1	0	1	2	1	4	0	0	0
macs2_2.9e9_plus_peak_1253	chr1	17927437	17927697	+	261	0	4	2	3	1	2	2	3	9	0	4	3
macs2_2.9e9_plus_peak_1254	chr1	17950217	17950424	+	208	0	0	1	0	2	0	0	2	3	0	4	2
macs2_2.9e9_plus_peak_1255	chr1	17954434	17954651	+	218	0	5	2	3	0	1	0	1	0	1	2	0
macs2_2.9e9_plus_peak_1256	chr1	17966933	17967408	+	476	13	17	19	24	13	9	9	9	18	10	15	20
macs2_2.9e9_plus_peak_1257	chr1	17968378	17968625	+	248	1	6	7	4	2	2	3	0	4	2	2	0
macs2_2.9e9_plus_peak_1258	chr1	17977105	17977317	+	213	2	2	0	2	2	0	0	0	1	3	0	2
macs2_2.9e9_plus_peak_1259	chr1	17989911	17990113	+	203	0	1	0	6	0	0	0	1	4	1	0	0
macs2_2.9e9_plus_peak_1260	chr1	18013158	18013466	+	309	4	0	2	3	1	0	1	2	4	1	1	5
macs2_2.9e9_plus_peak_1261	chr1	18017360	18017598	+	239	1	3	2	1	1	0	2	1	6	3	2	3
macs2_2.9e9_plus_peak_1262	chr1	18024047	18024497	+	451	101	93	58	90	38	33	40	41	45	42	36	47
macs2_2.9e9_plus_peak_1263	chr1	18153427	18153626	+	200	0	1	0	1	1	0	0	0	4	4	0	0
macs2_2.9e9_plus_peak_1264	chr1	18192051	18192250	+	200	0	0	2	1	0	1	0	1	0	0	2	0
macs2_2.9e9_plus_peak_1265	chr1	18274629	18274842	+	214	2	0	0	2	1	0	1	0	0	0	2	3
macs2_2.9e9_plus_peak_1266	chr1	18474403	18474660	+	258	0	0	2	3	0	0	1	2	2	9	1	5
macs2_2.9e9_plus_peak_1267	chr1	18475188	18475387	+	200	1	1	0	1	0	1	1	0	1	0	0	2
macs2_2.9e9_plus_peak_1268	chr1	18486035	18486258	+	224	0	0	2	1	1	0	0	1	1	2	0	1
macs2_2.9e9_plus_peak_1269	chr1	18489584	18489842	+	259	1	6	4	1	1	1	3	0	4	4	6	6
macs2_2.9e9_plus_peak_1270	chr1	18504447	18504646	+	200	1	1	0	2	0	0	0	2	2	1	0	2
macs2_2.9e9_plus_peak_1271	chr1	18704894	18705093	+	200	0	4	3	0	2	0	1	0	1	0	0	0
macs2_2.9e9_plus_peak_1272	chr1	18812353	18812552	+	200	0	2	0	0	0	3	0	0	2	2	3	0
macs2_2.9e9_plus_peak_1273	chr1	18961815	18962026	+	212	0	2	1	0	1	2	1	2	1	0	3	2
macs2_2.9e9_plus_peak_1274	chr1	18968027	18968274	+	248	4	1	0	1	0	0	2	0	2	2	1	4
macs2_2.9e9_plus_peak_1275	chr1	19021486	19021688	+	203	3	1	1	1	1	0	1	1	1	0	5	0
macs2_2.9e9_plus_peak_1276	chr1	19075175	19075478	+	304	17	20	11	11	10	2	6	8	4	0	7	9
macs2_2.9e9_plus_peak_1277	chr1	19516644	19516900	+	257	0	0	1	0	0	0	0	1	4	0	1	0
macs2_2.9e9_plus_peak_1278	chr1	19536993	19537228	+	236	90	94	31	38	8	9	9	22	9	15	29	19
macs2_2.9e9_plus_peak_1279	chr1	19539994	19540345	+	352	142	156	61	74	17	24	21	45	43	34	54	34
macs2_2.9e9_plus_peak_1280	chr1	19542576	19542820	+	245	13	14	6	11	8	8	3	18	7	16	7	7
macs2_2.9e9_plus_peak_1281	chr1	19552030	19552234	+	205	1	6	0	1	0	0	0	1	4	3	3	1
macs2_2.9e9_plus_peak_1282	chr1	19553411	19553628	+	218	2	3	3	4	2	1	1	3	2	4	5	4
macs2_2.9e9_plus_peak_1283	chr1	19578741	19578975	+	235	17	14	15	28	16	14	14	15	22	10	26	19
macs2_2.9e9_plus_peak_1284	chr1	19579468	19579853	+	386	29	24	33	31	24	24	22	14	24	23	17	20
macs2_2.9e9_plus_peak_1285	chr1	19581674	19581970	+	297	25	28	19	32	15	18	20	20	23	4	19	29
macs2_2.9e9_plus_peak_1286	chr1	19585308	19586072	+	765	309	261	226	257	186	290	184	180	372	321	356	312
macs2_2.9e9_plus_peak_1287	chr1	19586395	19586734	+	340	61	56	28	40	16	40	16	31	35	28	38	28
macs2_2.9e9_plus_peak_1288	chr1	19588989	19589210	+	222	9	11	9	10	8	4	1	4	19	19	30	15
macs2_2.9e9_plus_peak_1289	chr1	19655259	19655925	+	667	61	51	43	56	25	47	25	27	38	36	50	42
macs2_2.9e9_plus_peak_1290	chr1	19660828	19661101	+	274	4	4	0	2	0	2	0	0	7	6	6	7
macs2_2.9e9_plus_peak_1291	chr1	19767411	19767642	+	232	1	0	0	2	1	2	1	1	0	1	0	1
macs2_2.9e9_plus_peak_1292	chr1	19812791	19813183	+	393	19	3	13	14	1	5	8	1	8	12	6	3
macs2_2.9e9_plus_peak_1293	chr1	19923510	19923777	+	268	341	172	202	186	86	150	74	109	125	136	10	110
macs2_2.9e9_plus_peak_1294	chr1	19924962	19925184	+	223	6	6	7	6	0	3	6	3	7	10	3	6
macs2_2.9e9_plus_peak_1295	chr1	19926635	19927269	+	635	126	114	87	100	43	68	57	70	77	70	59	70
macs2_2.9e9_plus_peak_1296	chr1	19927957	19928198	+	242	74	84	63	79	33	49	30	57	64	50	61	52
macs2_2.9e9_plus_peak_1297	chr1	19933095	19933380	+	286	34	33	29	34	16	14	28	24	35	20	13	22
macs2_2.9e9_plus_peak_1298	chr1	19934406	19935270	+	865	4477	5020	4585	4726	2309	3804	2622	3256	6645	4317	4509	4247
macs2_2.9e9_plus_peak_1299	chr1	19940659	19940928	+	270	12	9	7	13	9	5	5	9	7	10	14	8
macs2_2.9e9_plus_peak_1300	chr1	19948607	19948807	+	201	445	228	291	239	113	194	88	158	180	199	6	171
macs2_2.9e9_plus_peak_1301	chr1	19949990	19950248	+	259	304	200	211	183	90	136	72	111	164	150	17	143
macs2_2.9e9_plus_peak_1302	chr1	19952774	19953256	+	483	567	477	426	412	238	333	268	285	462	357	350	339
macs2_2.9e9_plus_peak_1303	chr1	19956102	19956362	+	261	6	2	8	6	7	11	2	4	9	14	16	12
macs2_2.9e9_plus_peak_1304	chr1	19973694	19974044	+	351	4	4	2	14	3	4	2	4	2	6	7	7
macs2_2.9e9_plus_peak_1305	chr1	19976992	19977411	+	420	2	14	15	18	6	9	4	14	9	15	15	13
macs2_2.9e9_plus_peak_1306	chr1	19983720	19983958	+	239	7	5	12	11	4	6	8	7	8	11	3	9
macs2_2.9e9_plus_peak_1307	chr1	19984470	19985078	+	609	284	175	254	193	92	153	118	133	294	261	212	174
macs2_2.9e9_plus_peak_1308	chr1	20000663	20000924	+	262	5	2	8	5	1	2	4	3	5	2	3	5
macs2_2.9e9_plus_peak_1309	chr1	20007104	20007588	+	485	18	13	18	18	7	23	9	12	15	17	13	16
macs2_2.9e9_plus_peak_1310	chr1	20078431	20078631	+	201	0	0	0	0	0	0	0	0	0	0	0	0
macs2_2.9e9_plus_peak_1311	chr1	20133558	20133764	+	207	1	0	3	0	1	2	0	0	3	0	1	2
macs2_2.9e9_plus_peak_1312	chr1	20205582	20205781	+	200	0	0	1	2	3	1	2	0	0	0	1	1
macs2_2.9e9_plus_peak_1313	chr1	20211867	20212101	+	235	7	3	0	2	1	3	0	1	6	2	1	3
macs2_2.9e9_plus_peak_1314	chr1	20215318	20215915	+	598	10	15	17	19	4	18	13	12	14	6	13	2
macs2_2.9e9_plus_peak_1315	chr1	20216909	20217181	+	273	14	2	8	6	2	2	1	3	7	8	3	0
macs2_2.9e9_plus_peak_1316	chr1	20220909	20221143	+	235	8	9	5	10	2	2	3	6	5	4	2	6
macs2_2.9e9_plus_peak_1317	chr1	20224037	20224330	+	294	64	76	47	83	28	39	34	33	39	40	45	31
macs2_2.9e9_plus_peak_1318	chr1	20230680	20231049	+	370	25	31	19	29	15	16	15	11	22	21	26	17
macs2_2.9e9_plus_peak_1319	chr1	20231751	20231950	+	200	5	5	3	5	1	1	3	1	1	0	6	3
macs2_2.9e9_plus_peak_1320	chr1	20232985	20233191	+	207	5	1	5	0	4	4	1	2	6	2	3	3
macs2_2.9e9_plus_peak_1321	chr1	20239005	20239572	+	568	221	189	157	163	53	81	75	73	76	84	61	69
macs2_2.9e9_plus_peak_1322	chr1	20246202	20246401	+	200	0	1	1	0	0	0	0	0	1	0	0	2
macs2_2.9e9_plus_peak_1323	chr1	20834721	20835116	+	396	32	21	24	33	7	23	16	14	19	17	18	17
macs2_2.9e9_plus_peak_1324	chr1	20881206	20881622	+	417	14	12	9	19	6	9	4	9	17	12	17	9
macs2_2.9e9_plus_peak_1325	chr1	20919444	20919655	+	212	3	5	0	1	1	2	0	0	0	0	1	0
macs2_2.9e9_plus_peak_1326	chr1	20922199	20922433	+	235	4	1	2	1	1	0	0	0	4	0	2	4
macs2_2.9e9_plus_peak_1327	chr1	20927020	20927365	+	346	3	5	3	2	1	0	0	1	2	2	5	1
macs2_2.9e9_plus_peak_1328	chr1	20933853	20934052	+	200	0	1	0	1	0	0	2	0	1	0	0	0
macs2_2.9e9_plus_peak_1329	chr1	20939176	20939575	+	400	10	12	19	7	12	19	4	10	8	9	7	4
macs2_2.9e9_plus_peak_1330	chr1	20945164	20945532	+	369	39	48	27	17	16	40	23	19	36	16	31	24
macs2_2.9e9_plus_peak_1331	chr1	20962254	20962454	+	201	5	0	2	2	2	0	0	3	2	1	1	0
macs2_2.9e9_plus_peak_1332	chr1	20964981	20965234	+	254	4	3	5	7	6	1	0	2	4	2	3	1
macs2_2.9e9_plus_peak_1333	chr1	20966516	20966957	+	442	5	2	4	4	5	2	0	1	7	4	4	1
macs2_2.9e9_plus_peak_1334	chr1	20971279	20971601	+	323	5	2	9	2	3	3	6	1	3	1	0	1
macs2_2.9e9_plus_peak_1335	chr1	20976989	20978090	+	1102	366	292	298	312	134	208	153	215	231	240	216	262
macs2_2.9e9_plus_peak_1336	chr1	20989598	20989847	+	250	1	1	6	3	4	0	1	2	1	2	0	2
macs2_2.9e9_plus_peak_1337	chr1	20996333	20996532	+	200	2	0	3	1	1	0	2	1	0	2	1	1
macs2_2.9e9_plus_peak_1338	chr1	21023821	21024084	+	264	5	5	7	4	7	5	6	5	4	4	10	5
macs2_2.9e9_plus_peak_1339	chr1	21033249	21033454	+	206	6	0	1	1	1	0	0	0	1	0	2	1
macs2_2.9e9_plus_peak_1340	chr1	21059653	21059868	+	216	1	1	0	1	0	0	1	1	2	0	0	2
macs2_2.9e9_plus_peak_1341	chr1	21109356	21109562	+	207	3	0	0	2	3	1	2	0	3	3	5	3
macs2_2.9e9_plus_peak_1342	chr1	21344015	21344217	+	203	0	0	0	0	0	0	0	0	0	0	0	0
macs2_2.9e9_plus_peak_1343	chr1	21494152	21494362	+	211	0	1	1	1	0	2	1	0	6	2	2	2
macs2_2.9e9_plus_peak_1344	chr1	21499538	21499738	+	201	0	0	1	2	2	0	0	2	0	1	1	3
macs2_2.9e9_plus_peak_1345	chr1	21618518	21618811	+	294	12	11	9	7	9	8	4	6	17	9	6	7
macs2_2.9e9_plus_peak_1346	chr1	21621739	21621939	+	201	4	1	4	2	1	4	1	3	3	4	3	0
macs2_2.9e9_plus_peak_1347	chr1	21622770	21623128	+	359	2	3	10	8	2	2	1	1	3	6	5	7
macs2_2.9e9_plus_peak_1348	chr1	21626091	21626408	+	318	7	7	8	4	1	5	0	2	8	11	10	7
macs2_2.9e9_plus_peak_1349	chr1	21674596	21675329	+	734	9	17	11	21	5	14	8	13	20	21	28	16
macs2_2.9e9_plus_peak_1350	chr1	21678358	21678592	+	235	1	2	1	0	2	2	2	1	7	7	4	1
macs2_2.9e9_plus_peak_1351	chr1	21678895	21679186	+	292	6	11	4	1	1	2	8	3	11	19	8	11
macs2_2.9e9_plus_peak_1352	chr1	21694455	21694655	+	201	1	0	1	2	0	0	1	0	1	0	2	0
macs2_2.9e9_plus_peak_1353	chr1	21716195	21716397	+	203	0	2	0	0	2	0	1	0	1	1	0	5
macs2_2.9e9_plus_peak_1354	chr1	21722635	21722871	+	237	0	1	2	2	0	0	1	0	2	2	1	3
macs2_2.9e9_plus_peak_1355	chr1	21758476	21758869	+	394	2	6	4	5	1	7	1	2	0	3	1	4
macs2_2.9e9_plus_peak_1356	chr1	21768045	21768336	+	292	6	15	4	16	12	4	6	7	8	2	11	5
macs2_2.9e9_plus_peak_1357	chr1	21769571	21769795	+	225	4	4	2	2	0	3	0	1	3	2	1	2
macs2_2.9e9_plus_peak_1358	chr1	21777587	21777899	+	313	3	5	7	3	2	1	3	3	5	4	5	6
macs2_2.9e9_plus_peak_1359	chr1	21783260	21783841	+	582	22	11	18	14	10	23	11	18	12	29	15	21
macs2_2.9e9_plus_peak_1360	chr1	21788814	21789046	+	233	3	6	5	8	1	1	5	4	2	1	3	2
macs2_2.9e9_plus_peak_1361	chr1	21790288	21790524	+	237	4	3	1	0	0	5	3	2	2	0	5	0
macs2_2.9e9_plus_peak_1362	chr1	21790953	21791590	+	638	55	48	28	47	14	9	9	17	10	27	23	22
macs2_2.9e9_plus_peak_1363	chr1	21792945	21793313	+	369	17	7	9	4	4	9	3	6	5	5	10	7
macs2_2.9e9_plus_peak_1364	chr1	21811028	21811522	+	495	64	61	51	62	22	38	26	24	41	41	31	34
macs2_2.9e9_plus_peak_1365	chr1	21860277	21860548	+	272	1	2	2	3	1	0	2	1	8	11	5	4
macs2_2.9e9_plus_peak_1366	chr1	21879466	21879665	+	200	0	2	0	5	0	0	0	4	1	1	0	1
macs2_2.9e9_plus_peak_1367	chr1	21892090	21892448	+	359	1	0	1	1	2	2	0	4	3	0	2	3
macs2_2.9e9_plus_peak_1368	chr1	21899792	21900047	+	256	1	3	2	7	0	3	5	0	3	6	3	3
macs2_2.9e9_plus_peak_1369	chr1	21904579	21905043	+	465	22	21	30	23	5	19	8	12	27	23	12	26
macs2_2.9e9_plus_peak_1370	chr1	22235349	22235707	+	359	0	0	3	2	3	7	4	3	3	1	0	1
macs2_2.9e9_plus_peak_1371	chr1	22353431	22353837	+	407	9	9	5	10	6	2	0	7	16	4	9	5
macs2_2.9e9_plus_peak_1372	chr1	22354711	22354927	+	217	0	2	2	6	4	3	1	3	3	1	3	2
macs2_2.9e9_plus_peak_1373	chr1	22357332	22357847	+	516	53	36	36	38	20	26	16	31	42	47	21	29
macs2_2.9e9_plus_peak_1374	chr1	22382813	22383014	+	202	0	5	1	0	2	1	1	0	6	1	4	1
macs2_2.9e9_plus_peak_1375	chr1	22386709	22387003	+	295	19	36	19	19	12	15	15	13	13	12	17	23
macs2_2.9e9_plus_peak_1376	chr1	22388939	22389363	+	425	153	159	127	137	56	82	84	92	103	76	103	100
macs2_2.9e9_plus_peak_1377	chr1	22392742	22392990	+	249	41	37	30	41	18	16	17	24	18	14	33	19
macs2_2.9e9_plus_peak_1378	chr1	22394408	22394662	+	255	11	10	6	11	3	5	2	10	8	7	2	9
macs2_2.9e9_plus_peak_1379	chr1	22399941	22400277	+	337	27	39	14	17	9	6	10	11	22	13	12	19
macs2_2.9e9_plus_peak_1380	chr1	22400863	22401190	+	328	70	61	27	40	20	24	16	32	28	29	26	31
macs2_2.9e9_plus_peak_1381	chr1	22403099	22403435	+	337	35	24	18	27	10	11	14	17	10	15	18	23
macs2_2.9e9_plus_peak_1382	chr1	22406204	22406539	+	336	14	4	7	11	3	2	8	4	9	6	5	6
macs2_2.9e9_plus_peak_1383	chr1	22412089	22412491	+	403	43	37	26	46	21	25	26	27	49	14	27	28
macs2_2.9e9_plus_peak_1384	chr1	22413214	22413514	+	301	21	17	22	15	4	10	5	9	9	11	7	6
macs2_2.9e9_plus_peak_1385	chr1	22417101	22417311	+	211	13	7	11	12	6	8	6	12	10	9	10	6
macs2_2.9e9_plus_peak_1386	chr1	22417977	22419561	+	1585	1362	1177	1043	1009	454	680	549	684	1003	898	722	790
macs2_2.9e9_plus_peak_1387	chr1	22427673	22427926	+	254	9	2	5	0	1	2	0	3	0	1	0	0
macs2_2.9e9_plus_peak_1388	chr1	22428790	22428992	+	203	2	3	2	2	1	0	0	0	1	2	6	2
macs2_2.9e9_plus_peak_1389	chr1	22429875	22430275	+	401	15	16	14	22	6	5	6	12	15	18	19	12
macs2_2.9e9_plus_peak_1390	chr1	22436390	22436810	+	421	46	40	22	35	24	24	14	17	36	52	40	22
macs2_2.9e9_plus_peak_1391	chr1	22437083	22437344	+	262	9	9	9	11	5	8	4	4	13	12	10	9
macs2_2.9e9_plus_peak_1392	chr1	22445307	22445603	+	297	4	1	0	0	0	0	1	0	9	12	4	7
macs2_2.9e9_plus_peak_1393	chr1	22484696	22484938	+	243	1	0	0	0	0	2	0	1	1	0	2	0
macs2_2.9e9_plus_peak_1394	chr1	22506487	22506693	+	207	2	2	0	3	0	2	0	1	0	0	0	0
macs2_2.9e9_plus_peak_1395	chr1	22511069	22511279	+	211	5	1	0	2	1	1	0	2	0	0	0	1
macs2_2.9e9_plus_peak_1396	chr1	22755654	22755988	+	335	3	4	2	0	0	2	0	5	1	1	3	3
macs2_2.9e9_plus_peak_1397	chr1	22759825	22760038	+	214	4	4	3	3	1	3	0	2	1	2	3	0
macs2_2.9e9_plus_peak_1398	chr1	22762905	22763136	+	232	4	3	5	2	1	3	0	2	1	2	3	0
macs2_2.9e9_plus_peak_1399	chr1	22772485	22772984	+	500	12	14	11	12	0	7	3	4	6	5	14	8
macs2_2.9e9_plus_peak_1400	chr1	22773502	22773701	+	200	0	3	2	2	0	1	6	3	3	1	3	1
macs2_2.9e9_plus_peak_1401	chr1	22778053	22778252	+	200	1	5	1	0	1	0	0	1	3	2	4	5
macs2_2.9e9_plus_peak_1402	chr1	22778877	22779136	+	260	3	0	2	11	2	1	1	2	4	3	1	10
macs2_2.9e9_plus_peak_1403	chr1	22796348	22796587	+	240	2	3	4	4	3	0	2	0	2	6	4	3
macs2_2.9e9_plus_peak_1404	chr1	22801262	22801543	+	282	3	2	1	1	3	4	1	3	5	1	0	1
macs2_2.9e9_plus_peak_1405	chr1	22807983	22808419	+	437	11	15	3	8	5	6	3	4	16	16	6	6
macs2_2.9e9_plus_peak_1406	chr1	22825243	22825443	+	201	4	2	4	4	2	0	4	2	1	5	6	3
macs2_2.9e9_plus_peak_1407	chr1	22826778	22827083	+	306	16	19	7	16	7	7	6	10	6	9	8	7
macs2_2.9e9_plus_peak_1408	chr1	22827528	22827733	+	206	6	7	2	6	2	9	2	3	7	4	12	2
macs2_2.9e9_plus_peak_1409	chr1	22828873	22829110	+	238	12	14	7	11	9	6	5	9	13	7	19	12
macs2_2.9e9_plus_peak_1410	chr1	22829201	22829404	+	204	5	5	9	4	0	1	1	0	8	3	3	2
macs2_2.9e9_plus_peak_1411	chr1	22837707	22838033	+	327	8	14	4	13	1	4	9	8	5	5	17	10
macs2_2.9e9_plus_peak_1412	chr1	22838170	22838659	+	490	5	17	4	13	4	3	7	13	11	0	12	8
macs2_2.9e9_plus_peak_1413	chr1	22854476	22855074	+	599	66	82	37	49	22	36	46	31	43	37	49	53
macs2_2.9e9_plus_peak_1414	chr1	22856798	22857318	+	521	128	104	71	74	31	45	42	49	64	64	73	59
macs2_2.9e9_plus_peak_1415	chr1	22857493	22857742	+	250	21	25	18	14	13	12	10	12	11	9	9	13
macs2_2.9e9_plus_peak_1416	chr1	22898394	22898622	+	229	1	0	5	1	0	1	0	1	4	1	4	1
macs2_2.9e9_plus_peak_1417	chr1	22903156	22903649	+	494	5	2	10	4	4	4	8	10	7	7	8	5
macs2_2.9e9_plus_peak_1418	chr1	22909407	22909940	+	534	14	8	37	32	12	12	24	23	40	31	37	29
macs2_2.9e9_plus_peak_1419	chr1	22915775	22916250	+	476	26	33	41	28	17	12	13	22	19	18	5	13
macs2_2.9e9_plus_peak_1420	chr1	22929917	22930224	+	308	5	4	0	4	1	2	0	2	8	7	4	6
macs2_2.9e9_plus_peak_1421	chr1	23042272	23042536	+	265	0	0	0	0	0	1	0	0	12	10	8	8
macs2_2.9e9_plus_peak_1422	chr1	23047395	23047737	+	343	2	6	2	0	0	1	0	2	3	2	2	4
macs2_2.9e9_plus_peak_1423	chr1	23053474	23053724	+	251	3	2	1	1	5	3	1	0	2	4	3	2
macs2_2.9e9_plus_peak_1424	chr1	23054119	23054410	+	292	19	9	8	8	2	4	9	13	10	18	18	14
macs2_2.9e9_plus_peak_1425	chr1	23061825	23062047	+	223	1	6	4	7	2	1	2	2	9	7	5	2
macs2_2.9e9_plus_peak_1426	chr1	23067969	23068311	+	343	35	37	19	28	6	9	15	16	29	29	31	20
macs2_2.9e9_plus_peak_1427	chr1	23071032	23071459	+	428	16	22	10	17	9	14	14	13	36	24	37	28
macs2_2.9e9_plus_peak_1428	chr1	23078892	23079140	+	249	3	2	2	2	0	2	1	3	1	3	1	0
macs2_2.9e9_plus_peak_1429	chr1	23087673	23088029	+	357	2	2	0	1	1	5	0	4	4	0	1	0
macs2_2.9e9_plus_peak_1430	chr1	23107641	23107928	+	288	12	4	2	6	4	1	1	4	3	1	6	4
macs2_2.9e9_plus_peak_1431	chr1	23109119	23109373	+	255	10	9	3	13	4	6	2	6	4	8	7	7
macs2_2.9e9_plus_peak_1432	chr1	23111737	23112005	+	269	0	1	4	6	3	0	1	3	6	2	2	4
macs2_2.9e9_plus_peak_1433	chr1	23118072	23118337	+	266	1	2	1	2	1	1	2	1	4	2	2	2
macs2_2.9e9_plus_peak_1434	chr1	23130264	23130505	+	242	2	3	2	5	2	0	0	1	4	2	3	4
macs2_2.9e9_plus_peak_1435	chr1	23134446	23134739	+	294	7	7	3	3	4	2	0	2	7	5	4	6
macs2_2.9e9_plus_peak_1436	chr1	23138767	23139003	+	237	3	5	0	3	2	2	3	0	4	3	1	1
macs2_2.9e9_plus_peak_1437	chr1	23147011	23147225	+	215	5	0	4	1	3	0	0	1	0	0	1	2
macs2_2.9e9_plus_peak_1438	chr1	23160009	23160239	+	231	4	4	3	2	0	1	0	0	0	1	0	1
macs2_2.9e9_plus_peak_1439	chr1	23160352	23160615	+	264	6	1	2	3	1	2	0	0	1	3	2	1
macs2_2.9e9_plus_peak_1440	chr1	23165313	23165543	+	231	12	9	8	8	4	3	1	0	1	3	2	2
macs2_2.9e9_plus_peak_1441	chr1	23180866	23181101	+	236	3	0	1	3	0	0	0	2	0	1	1	0
macs2_2.9e9_plus_peak_1442	chr1	23194254	23194491	+	238	2	1	1	3	1	2	2	0	0	0	1	1
macs2_2.9e9_plus_peak_1443	chr1	23198369	23198603	+	235	2	0	1	0	0	0	2	1	1	0	1	0
macs2_2.9e9_plus_peak_1444	chr1	23211487	23211796	+	310	4	3	2	3	4	1	1	3	3	0	0	0
macs2_2.9e9_plus_peak_1445	chr1	23214490	23214689	+	200	0	1	2	1	0	2	2	0	1	0	0	0
macs2_2.9e9_plus_peak_1446	chr1	23224485	23224740	+	256	9	15	10	7	1	4	5	0	1	0	1	1
macs2_2.9e9_plus_peak_1447	chr1	23226686	23226885	+	200	0	5	2	2	0	2	2	2	0	0	1	0
macs2_2.9e9_plus_peak_1448	chr1	23230658	23230889	+	232	0	5	4	0	0	2	1	1	0	1	0	0
macs2_2.9e9_plus_peak_1449	chr1	23240105	23240446	+	342	17	31	10	17	12	6	11	9	0	3	3	3
macs2_2.9e9_plus_peak_1450	chr1	23240917	23241280	+	364	528	572	291	399	118	206	136	195	71	60	52	69
macs2_2.9e9_plus_peak_1451	chr1	23282470	23282669	+	200	0	0	0	0	0	1	0	1	0	0	2	0
macs2_2.9e9_plus_peak_1452	chr1	23334547	23334778	+	232	1	1	3	6	0	2	3	0	4	2	6	1
macs2_2.9e9_plus_peak_1453	chr1	23346308	23346628	+	321	68	42	43	51	25	39	17	21	67	58	87	50
macs2_2.9e9_plus_peak_1454	chr1	23352099	23352704	+	606	21	15	29	25	9	11	17	13	25	13	10	8
macs2_2.9e9_plus_peak_1455	chr1	23353245	23353655	+	411	27	20	24	20	7	13	11	9	10	8	16	19
macs2_2.9e9_plus_peak_1456	chr1	23355368	23355716	+	349	20	15	22	14	13	13	17	6	6	10	7	10
macs2_2.9e9_plus_peak_1457	chr1	23356972	23357467	+	496	70	49	42	61	33	47	27	31	81	51	100	50
macs2_2.9e9_plus_peak_1458	chr1	23360335	23360558	+	224	9	6	6	9	4	0	2	4	6	2	4	3
macs2_2.9e9_plus_peak_1459	chr1	23362081	23362467	+	387	14	5	19	10	2	6	1	7	12	4	3	6
macs2_2.9e9_plus_peak_1460	chr1	23363660	23363931	+	272	9	9	14	7	8	3	5	8	6	3	5	4
macs2_2.9e9_plus_peak_1461	chr1	23366928	23367256	+	329	22	14	17	26	14	9	15	14	19	10	9	15
macs2_2.9e9_plus_peak_1462	chr1	23368432	23368650	+	219	10	5	8	11	5	5	7	13	8	4	10	12
macs2_2.9e9_plus_peak_1463	chr1	23374268	23374520	+	253	4	7	7	7	4	4	11	2	11	4	10	4
macs2_2.9e9_plus_peak_1464	chr1	23375500	23375744	+	245	5	2	8	6	3	4	4	3	4	3	1	2
macs2_2.9e9_plus_peak_1465	chr1	23376078	23376285	+	208	7	7	6	7	2	6	2	2	10	1	3	4
macs2_2.9e9_plus_peak_1466	chr1	23376959	23377203	+	245	8	6	8	9	2	3	5	4	4	3	1	2
macs2_2.9e9_plus_peak_1467	chr1	23380781	23381022	+	242	13	10	12	6	5	2	2	4	9	6	9	3
macs2_2.9e9_plus_peak_1468	chr1	23381605	23381877	+	273	12	7	1	9	0	1	2	3	7	1	4	3
macs2_2.9e9_plus_peak_1469	chr1	23382472	23382704	+	233	12	16	7	1	5	4	1	6	12	3	9	9
macs2_2.9e9_plus_peak_1470	chr1	23383983	23384240	+	258	21	30	13	9	13	11	7	14	19	20	21	13
macs2_2.9e9_plus_peak_1471	chr1	23385579	23385811	+	233	17	17	21	20	12	10	16	17	28	23	20	18
macs2_2.9e9_plus_peak_1472	chr1	23395063	23395353	+	291	51	25	22	19	9	20	15	7	33	32	20	36
macs2_2.9e9_plus_peak_1473	chr1	23395566	23396093	+	528	48	43	42	30	13	31	32	16	56	28	26	44
macs2_2.9e9_plus_peak_1474	chr1	23396810	23397103	+	294	12	16	18	19	10	16	15	8	14	9	10	12
macs2_2.9e9_plus_peak_1475	chr1	23397605	23397873	+	269	15	18	20	11	12	16	19	11	17	8	12	11
macs2_2.9e9_plus_peak_1476	chr1	23402368	23403574	+	1207	35	31	29	35	20	14	20	24	32	16	17	22
macs2_2.9e9_plus_peak_1477	chr1	23409716	23410326	+	611	825	705	612	541	206	547	351	431	655	718	333	700
macs2_2.9e9_plus_peak_1478	chr1	23454516	23454715	+	200	0	0	1	0	0	1	0	0	0	0	1	3
macs2_2.9e9_plus_peak_1479	chr1	23473482	23473684	+	203	1	1	0	0	0	3	0	1	1	0	0	0
macs2_2.9e9_plus_peak_1480	chr1	23488373	23488630	+	258	0	1	0	2	0	5	0	0	1	1	2	5
macs2_2.9e9_plus_peak_1481	chr1	23495575	23495960	+	386	7	2	5	4	3	6	3	4	8	3	5	7
macs2_2.9e9_plus_peak_1482	chr1	23555086	23555309	+	224	12	9	12	10	0	10	4	8	15	6	7	10
macs2_2.9e9_plus_peak_1483	chr1	23636394	23636892	+	499	13	12	6	10	2	11	5	6	4	8	7	6
macs2_2.9e9_plus_peak_1484	chr1	23671927	23672303	+	377	4	0	4	4	4	6	1	1	4	0	4	4
macs2_2.9e9_plus_peak_1485	chr1	23696682	23696940	+	259	1	2	5	6	2	3	2	4	2	3	3	7
macs2_2.9e9_plus_peak_1486	chr1	23697672	23698411	+	740	113	92	71	79	25	42	31	37	85	79	76	57
macs2_2.9e9_plus_peak_1487	chr1	23811614	23811898	+	285	1	1	1	2	1	1	0	2	0	3	2	0
macs2_2.9e9_plus_peak_1488	chr1	23827712	23827911	+	200	0	0	1	5	0	1	0	0	2	1	1	1
macs2_2.9e9_plus_peak_1489	chr1	23831005	23831220	+	216	0	0	0	0	0	0	0	0	0	0	0	0
macs2_2.9e9_plus_peak_1490	chr1	23879518	23879717	+	200	0	3	0	2	2	1	0	4	0	0	0	2
macs2_2.9e9_plus_peak_1491	chr1	23889146	23889474	+	329	2	3	6	2	2	3	1	1	2	4	4	7
macs2_2.9e9_plus_peak_1492	chr1	23922542	23922741	+	200	1	0	0	1	0	1	0	0	1	4	0	1
macs2_2.9e9_plus_peak_1493	chr1	23926431	23926689	+	259	1	0	1	0	2	0	0	0	1	4	1	0
macs2_2.9e9_plus_peak_1494	chr1	23927572	23927771	+	200	0	0	2	0	1	0	0	2	0	1	3	1
macs2_2.9e9_plus_peak_1495	chr1	23978206	23978441	+	236	4	5	3	2	5	2	1	0	6	6	2	3
macs2_2.9e9_plus_peak_1496	chr1	23980017	23980258	+	242	2	2	0	3	5	1	1	0	5	0	1	3
macs2_2.9e9_plus_peak_1497	chr1	24019140	24019403	+	264	206	114	194	155	128	91	118	117	154	160	159	141
macs2_2.9e9_plus_peak_1498	chr1	24020336	24020571	+	236	668	414	570	463	238	359	243	321	396	438	112	442
macs2_2.9e9_plus_peak_1499	chr1	24020726	24020955	+	230	25	17	31	34	21	15	19	22	37	14	21	10
macs2_2.9e9_plus_peak_1500	chr1	24021189	24021435	+	247	3277	2144	2679	2223	936	1498	1099	1467	2132	2143	998	1899
macs2_2.9e9_plus_peak_1501	chr1	24021723	24022560	+	838	9629	8301	8249	8534	4262	5126	4843	5360	8398	7664	7564	7894
macs2_2.9e9_plus_peak_1502	chr1	24022751	24023023	+	273	7259	6460	6571	6889	3665	4497	4110	4478	7430	6193	6734	6512
macs2_2.9e9_plus_peak_1503	chr1	24025342	24025549	+	208	13	30	17	21	7	7	11	11	12	16	8	10
macs2_2.9e9_plus_peak_1504	chr1	24029256	24029856	+	601	59	41	60	71	19	40	37	54	38	29	32	38
macs2_2.9e9_plus_peak_1505	chr1	24031911	24032173	+	263	23	27	12	16	9	10	11	10	32	19	10	16
macs2_2.9e9_plus_peak_1506	chr1	24032863	24033074	+	212	29	11	20	23	16	20	26	20	24	4	8	9
macs2_2.9e9_plus_peak_1507	chr1	24033358	24033715	+	358	14	16	23	28	19	29	21	22	16	7	21	7
macs2_2.9e9_plus_peak_1508	chr1	24038962	24039212	+	251	27	30	48	41	18	29	32	38	26	14	14	26
macs2_2.9e9_plus_peak_1509	chr1	24039731	24039959	+	229	9	15	11	12	8	12	9	14	12	6	1	4
macs2_2.9e9_plus_peak_1510	chr1	24042173	24042442	+	270	22	19	27	28	7	13	29	23	17	9	2	12
macs2_2.9e9_plus_peak_1511	chr1	24043573	24043826	+	254	25	21	35	32	20	15	21	30	27	8	11	9
macs2_2.9e9_plus_peak_1512	chr1	24047259	24047598	+	340	89	110	133	123	69	77	90	98	85	46	34	60
macs2_2.9e9_plus_peak_1513	chr1	24047699	24047918	+	220	5	13	11	13	7	7	16	6	2	6	4	8
macs2_2.9e9_plus_peak_1514	chr1	24048139	24048404	+	266	18	20	30	20	16	13	35	33	18	16	13	14
macs2_2.9e9_plus_peak_1515	chr1	24049021	24049274	+	254	17	24	33	25	9	15	30	26	28	9	6	14
macs2_2.9e9_plus_peak_1516	chr1	24052996	24053242	+	247	18	15	21	14	3	11	16	17	12	6	6	9
macs2_2.9e9_plus_peak_1517	chr1	24058005	24058375	+	371	8	17	14	11	8	12	17	17	10	4	5	10
macs2_2.9e9_plus_peak_1518	chr1	24060269	24060594	+	326	16	14	10	17	10	16	25	20	21	7	3	3
macs2_2.9e9_plus_peak_1519	chr1	24063825	24064179	+	355	18	23	31	22	23	12	28	30	18	12	13	18
macs2_2.9e9_plus_peak_1520	chr1	24065116	24065341	+	226	18	10	22	29	23	15	31	20	20	7	5	10
macs2_2.9e9_plus_peak_1521	chr1	24066334	24066701	+	368	18	9	13	18	10	12	12	22	15	1	5	9
macs2_2.9e9_plus_peak_1522	chr1	24067620	24068017	+	398	12	11	16	24	21	9	16	25	10	4	17	8
macs2_2.9e9_plus_peak_1523	chr1	24072838	24073222	+	385	20	17	22	31	13	9	25	25	13	6	12	17
macs2_2.9e9_plus_peak_1524	chr1	24077800	24078536	+	737	75	67	58	74	43	42	53	53	82	60	96	68
macs2_2.9e9_plus_peak_1525	chr1	24079813	24080012	+	200	6	6	4	9	3	4	4	2	5	3	5	6
macs2_2.9e9_plus_peak_1526	chr1	24085349	24085654	+	306	7	9	3	6	5	8	5	4	10	11	7	8
macs2_2.9e9_plus_peak_1527	chr1	24086093	24086515	+	423	168	134	129	130	71	118	95	94	128	125	91	105
macs2_2.9e9_plus_peak_1528	chr1	24088121	24088656	+	536	266	242	177	199	98	105	116	115	181	168	124	165
macs2_2.9e9_plus_peak_1529	chr1	24094994	24095199	+	206	1	1	0	1	2	1	1	1	2	0	1	2
macs2_2.9e9_plus_peak_1530	chr1	24096822	24097026	+	205	3	1	0	0	0	2	0	0	1	3	0	1
macs2_2.9e9_plus_peak_1531	chr1	24107763	24108064	+	302	17	3	9	10	3	3	16	4	11	8	7	7
macs2_2.9e9_plus_peak_1532	chr1	24108770	24109059	+	290	17	12	15	15	6	11	5	16	10	10	20	15
macs2_2.9e9_plus_peak_1533	chr1	24114094	24114853	+	760	393	304	260	308	163	240	143	215	445	416	417	359
macs2_2.9e9_plus_peak_1534	chr1	24121538	24122168	+	631	552	435	336	350	192	285	207	266	382	289	319	263
macs2_2.9e9_plus_peak_1535	chr1	24152073	24152460	+	388	1	6	3	2	1	2	1	0	5	9	1	1
macs2_2.9e9_plus_peak_1536	chr1	24160839	24161038	+	200	1	1	0	0	2	2	0	0	0	1	1	2
macs2_2.9e9_plus_peak_1537	chr1	24180676	24180875	+	200	0	0	0	0	0	0	0	0	0	0	0	0
macs2_2.9e9_plus_peak_1538	chr1	24275005	24275217	+	213	0	0	0	0	2	0	0	1	0	0	0	0
macs2_2.9e9_plus_peak_1539	chr1	24286376	24286652	+	277	13	8	13	6	4	4	3	3	1	3	9	2
macs2_2.9e9_plus_peak_1540	chr1	24287536	24287810	+	275	23	25	20	22	12	6	9	5	16	14	18	20
macs2_2.9e9_plus_peak_1541	chr1	24287931	24288223	+	293	23	25	19	23	11	4	9	5	16	14	17	20
macs2_2.9e9_plus_peak_1542	chr1	24289839	24290090	+	252	103	75	42	52	33	51	36	45	66	59	43	49
macs2_2.9e9_plus_peak_1543	chr1	24362904	24363125	+	222	0	0	0	0	0	0	0	0	0	0	0	0
macs2_2.9e9_plus_peak_1544	chr1	24537945	24538272	+	328	2	8	0	1	0	0	0	0	2	10	4	3
macs2_2.9e9_plus_peak_1545	chr1	24570292	24570607	+	316	3	4	1	7	5	4	1	2	5	6	6	5
macs2_2.9e9_plus_peak_1546	chr1	24586007	24586213	+	207	3	1	4	2	2	3	0	0	5	1	4	4
macs2_2.9e9_plus_peak_1547	chr1	24649874	24650272	+	399	8	5	4	1	3	5	1	2	7	4	11	6
macs2_2.9e9_plus_peak_1548	chr1	24650420	24650726	+	307	3	4	0	1	0	2	1	0	3	5	6	3
macs2_2.9e9_plus_peak_1549	chr1	24650908	24651118	+	211	3	3	1	3	0	2	1	2	13	0	4	5
macs2_2.9e9_plus_peak_1550	chr1	24681610	24681906	+	297	1	0	0	0	0	0	1	0	7	3	6	1
macs2_2.9e9_plus_peak_1551	chr1	24742292	24742501	+	210	7	11	1	11	7	7	2	2	7	6	13	6
macs2_2.9e9_plus_peak_1552	chr1	24746394	24746718	+	325	16	17	21	34	9	18	11	14	14	14	33	18
macs2_2.9e9_plus_peak_1553	chr1	24747475	24747953	+	479	37	33	19	32	12	20	16	21	22	20	21	23
macs2_2.9e9_plus_peak_1554	chr1	24754635	24754835	+	201	0	3	2	2	1	2	1	2	0	0	1	3
macs2_2.9e9_plus_peak_1555	chr1	24760439	24760966	+	528	40	44	35	39	8	23	20	21	38	23	20	19
macs2_2.9e9_plus_peak_1556	chr1	24761609	24761845	+	237	6	3	0	7	2	0	1	2	2	1	4	2
macs2_2.9e9_plus_peak_1557	chr1	24764234	24764484	+	251	11	11	10	7	4	8	4	8	6	11	7	6
macs2_2.9e9_plus_peak_1558	chr1	24769205	24769415	+	211	3	10	7	4	6	2	2	2	0	2	2	1
macs2_2.9e9_plus_peak_1559	chr1	24770680	24770904	+	225	8	4	7	6	2	1	3	3	7	5	7	4
macs2_2.9e9_plus_peak_1560	chr1	24773839	24774146	+	308	15	12	9	14	2	9	6	6	6	9	4	7
macs2_2.9e9_plus_peak_1561	chr1	24777841	24778318	+	478	27	23	18	31	16	10	13	25	15	13	14	17
macs2_2.9e9_plus_peak_1562	chr1	24782021	24782265	+	245	6	7	6	8	4	2	6	6	4	2	5	10
macs2_2.9e9_plus_peak_1563	chr1	24783001	24783313	+	313	15	24	19	16	8	13	10	15	13	7	8	13
macs2_2.9e9_plus_peak_1564	chr1	24787961	24788483	+	523	14	21	9	36	12	10	6	15	12	21	19	8
macs2_2.9e9_plus_peak_1565	chr1	24789363	24789743	+	381	10	8	9	16	6	2	1	5	5	5	7	2
macs2_2.9e9_plus_peak_1566	chr1	24789889	24790159	+	271	18	40	22	28	11	12	9	17	16	20	23	26
macs2_2.9e9_plus_peak_1567	chr1	24792636	24792954	+	319	23	30	28	21	14	13	9	4	10	12	7	12
macs2_2.9e9_plus_peak_1568	chr1	24793778	24794027	+	250	17	20	10	24	9	11	5	6	14	9	16	9
macs2_2.9e9_plus_peak_1569	chr1	24797748	24798331	+	584	150	106	50	89	54	49	51	55	111	89	133	100
macs2_2.9e9_plus_peak_1570	chr1	24799139	24799572	+	434	215	173	70	90	42	62	47	62	133	143	121	82
macs2_2.9e9_plus_peak_1571	chr1	24801415	24801615	+	201	13	14	2	6	2	7	4	7	4	7	15	6
macs2_2.9e9_plus_peak_1572	chr1	24802951	24803219	+	269	108	74	37	31	17	32	20	34	34	42	2	38
macs2_2.9e9_plus_peak_1573	chr1	24832525	24832885	+	361	11	14	8	12	3	9	10	5	10	10	8	8
macs2_2.9e9_plus_peak_1574	chr1	24833079	24833287	+	209	3	3	2	3	2	3	1	0	3	6	11	1
macs2_2.9e9_plus_peak_1575	chr1	24840836	24841166	+	331	13	19	13	10	9	10	8	11	21	7	23	11
macs2_2.9e9_plus_peak_1576	chr1	24842358	24842762	+	405	14	7	12	14	7	6	8	10	11	6	8	8
macs2_2.9e9_plus_peak_1577	chr1	24854592	24854827	+	236	4	6	8	10	5	2	2	2	10	7	4	5
macs2_2.9e9_plus_peak_1578	chr1	24859685	24859922	+	238	24	16	8	15	5	15	13	13	18	19	25	27
macs2_2.9e9_plus_peak_1579	chr1	24863298	24863591	+	294	16	5	10	12	4	4	4	14	7	11	8	12
macs2_2.9e9_plus_peak_1580	chr1	24865262	24865832	+	571	24	24	7	15	5	19	8	13	28	25	30	21
macs2_2.9e9_plus_peak_1581	chr1	24867116	24867658	+	543	97	67	72	78	34	41	31	32	84	87	61	83
macs2_2.9e9_plus_peak_1582	chr1	24888173	24888503	+	331	0	0	1	3	0	1	0	1	6	5	3	0
macs2_2.9e9_plus_peak_1583	chr1	24890863	24891088	+	226	0	1	3	0	1	1	2	0	1	1	1	3
macs2_2.9e9_plus_peak_1584	chr1	24969774	24970014	+	241	231	154	129	187	134	138	86	122	122	117	158	146
macs2_2.9e9_plus_peak_1585	chr1	24973193	24973452	+	260	193	93	105	93	67	78	67	65	79	63	60	100
macs2_2.9e9_plus_peak_1586	chr1	24973595	24973840	+	246	18	15	31	27	12	8	12	11	32	22	20	25
macs2_2.9e9_plus_peak_1587	chr1	24975148	24975674	+	527	1138	1169	751	1007	632	637	499	606	871	600	843	736
macs2_2.9e9_plus_peak_1588	chr1	24976460	24976730	+	271	130	131	105	128	96	83	70	84	96	58	85	93
macs2_2.9e9_plus_peak_1589	chr1	24977945	24978240	+	296	67	53	51	44	35	18	32	30	37	39	33	42
macs2_2.9e9_plus_peak_1590	chr1	24978661	24979120	+	460	115	125	90	151	62	60	88	80	105	67	82	84
macs2_2.9e9_plus_peak_1591	chr1	24981554	24981754	+	201	11	8	4	2	1	2	8	5	4	3	1	4
macs2_2.9e9_plus_peak_1592	chr1	24987842	24988193	+	352	9	3	7	7	4	7	6	2	11	4	7	10
macs2_2.9e9_plus_peak_1593	chr1	24989395	24989603	+	209	13	11	6	11	3	12	1	5	7	7	6	3
macs2_2.9e9_plus_peak_1594	chr1	24993157	24993373	+	217	15	17	9	25	9	5	12	11	16	3	10	10
macs2_2.9e9_plus_peak_1595	chr1	24995907	24996218	+	312	45	41	29	20	4	26	16	17	17	17	12	21
macs2_2.9e9_plus_peak_1596	chr1	24996639	24996972	+	334	231	302	161	222	109	139	129	108	177	118	164	192
macs2_2.9e9_plus_peak_1597	chr1	24997812	24998091	+	280	192	304	113	223	115	132	116	111	181	102	171	170
macs2_2.9e9_plus_peak_1598	chr1	24999216	24999858	+	643	1432	1112	1000	1142	570	978	777	878	1122	1010	593	1062
macs2_2.9e9_plus_peak_1599	chr1	25073914	25074165	+	252	10	26	20	22	5	13	10	5	20	14	10	18
macs2_2.9e9_plus_peak_1600	chr1	25074396	25074716	+	321	14	7	8	3	10	5	4	4	8	6	6	3
macs2_2.9e9_plus_peak_1601	chr1	25075571	25075824	+	254	12	7	9	12	4	5	6	2	11	6	9	10
macs2_2.9e9_plus_peak_1602	chr1	25081955	25082298	+	344	180	203	117	163	75	85	77	80	137	134	120	132
macs2_2.9e9_plus_peak_1603	chr1	25086766	25086969	+	204	11	12	9	13	9	7	2	10	9	9	7	8
macs2_2.9e9_plus_peak_1604	chr1	25087661	25087883	+	223	18	15	6	11	2	13	4	9	8	23	13	14
macs2_2.9e9_plus_peak_1605	chr1	25088551	25088969	+	419	13	14	14	7	7	8	7	11	14	11	12	17
macs2_2.9e9_plus_peak_1606	chr1	25093297	25093649	+	353	34	38	29	37	12	20	13	10	36	18	25	16
macs2_2.9e9_plus_peak_1607	chr1	25095363	25095721	+	359	14	12	9	4	4	8	5	7	5	7	14	4
macs2_2.9e9_plus_peak_1608	chr1	25096847	25097137	+	291	13	19	7	8	2	10	5	2	12	5	8	8
macs2_2.9e9_plus_peak_1609	chr1	25098379	25098679	+	301	21	21	8	10	4	3	4	9	8	12	6	14
macs2_2.9e9_plus_peak_1610	chr1	25105857	25106063	+	207	2	0	4	2	2	3	5	0	2	2	2	3
macs2_2.9e9_plus_peak_1611	chr1	25112235	25112514	+	280	10	14	8	8	4	6	4	1	5	7	4	5
macs2_2.9e9_plus_peak_1612	chr1	25118298	25118657	+	360	2	3	3	8	3	1	1	1	2	4	6	7
macs2_2.9e9_plus_peak_1613	chr1	25118875	25119150	+	276	21	29	12	16	5	10	7	8	17	11	26	19
macs2_2.9e9_plus_peak_1614	chr1	25121878	25122141	+	264	13	9	7	8	4	8	6	3	12	5	13	10
macs2_2.9e9_plus_peak_1615	chr1	25124305	25124513	+	209	5	3	2	2	0	3	0	1	4	0	7	3
macs2_2.9e9_plus_peak_1616	chr1	25127126	25127479	+	354	6	4	4	6	1	4	3	2	5	2	0	2
macs2_2.9e9_plus_peak_1617	chr1	25131445	25131713	+	269	2	5	2	7	4	1	3	1	8	2	4	1
macs2_2.9e9_plus_peak_1618	chr1	25133425	25133717	+	293	11	1	3	5	0	1	1	3	14	2	2	2
macs2_2.9e9_plus_peak_1619	chr1	25137163	25137366	+	204	10	5	6	5	3	3	4	2	5	3	11	5
macs2_2.9e9_plus_peak_1620	chr1	25138641	25139085	+	445	19	20	7	4	10	8	4	4	14	13	10	5
macs2_2.9e9_plus_peak_1621	chr1	25145182	25145453	+	272	31	46	28	32	14	21	11	20	33	30	23	31
macs2_2.9e9_plus_peak_1622	chr1	25150154	25150384	+	231	4	2	3	6	0	0	2	6	3	3	2	6
macs2_2.9e9_plus_peak_1623	chr1	25155713	25155951	+	239	2	4	0	1	0	0	2	2	2	2	1	0
macs2_2.9e9_plus_peak_1624	chr1	25162165	25162914	+	750	15	9	7	15	4	6	2	7	6	9	3	7
macs2_2.9e9_plus_peak_1625	chr1	25163314	25163738	+	425	4	12	10	9	4	3	4	2	17	7	2	8
macs2_2.9e9_plus_peak_1626	chr1	25168192	25168508	+	317	54	43	30	30	24	20	17	25	29	24	35	32
macs2_2.9e9_plus_peak_1627	chr1	25169212	25169512	+	301	19	11	17	10	7	5	6	11	14	20	12	7
macs2_2.9e9_plus_peak_1628	chr1	25170301	25170920	+	620	610	589	367	407	178	235	181	259	366	327	251	345
macs2_2.9e9_plus_peak_1629	chr1	25535963	25536167	+	205	1	2	3	1	1	0	0	4	0	0	0	1
macs2_2.9e9_plus_peak_1630	chr1	25561098	25561328	+	231	6	6	6	7	5	4	1	2	6	5	5	2
macs2_2.9e9_plus_peak_1631	chr1	25561926	25562495	+	570	22	11	10	8	7	5	6	6	7	14	9	11
macs2_2.9e9_plus_peak_1632	chr1	25563029	25563230	+	202	11	7	2	5	3	6	1	3	4	4	3	1
macs2_2.9e9_plus_peak_1633	chr1	25567609	25567827	+	219	16	9	3	4	5	2	1	5	1	3	2	3
macs2_2.9e9_plus_peak_1634	chr1	25571644	25571926	+	283	7	10	6	3	4	3	2	1	2	5	7	3
macs2_2.9e9_plus_peak_1635	chr1	25572044	25572245	+	202	4	4	1	3	0	1	0	0	2	3	1	3
macs2_2.9e9_plus_peak_1636	chr1	25574718	25574930	+	213	2	4	1	2	1	4	0	3	1	4	3	1
macs2_2.9e9_plus_peak_1637	chr1	25664822	25665039	+	218	5	7	4	8	2	3	2	6	9	3	6	5
macs2_2.9e9_plus_peak_1638	chr1	25665816	25666086	+	271	7	8	12	7	8	7	3	5	2	3	2	1
macs2_2.9e9_plus_peak_1639	chr1	25667029	25667470	+	442	19	27	33	21	16	16	21	22	12	11	6	9
macs2_2.9e9_plus_peak_1640	chr1	25669826	25670074	+	249	2	7	8	5	7	4	2	5	10	6	3	5
macs2_2.9e9_plus_peak_1641	chr1	25678880	25679099	+	220	7	10	5	7	3	7	4	13	7	2	5	6
macs2_2.9e9_plus_peak_1642	chr1	25679393	25679643	+	251	40	12	37	30	5	21	15	19	29	33	6	24
macs2_2.9e9_plus_peak_1643	chr1	25681021	25681365	+	345	6	4	12	8	2	5	6	9	12	14	11	9
macs2_2.9e9_plus_peak_1644	chr1	25681707	25681920	+	214	20	14	17	10	9	12	6	8	11	12	16	16
macs2_2.9e9_plus_peak_1645	chr1	25687179	25688043	+	865	467	365	409	418	196	297	267	321	435	385	257	347
macs2_2.9e9_plus_peak_1646	chr1	25688555	25688965	+	411	88	74	64	60	38	55	35	47	57	81	51	42
macs2_2.9e9_plus_peak_1647	chr1	25764336	25764610	+	275	22	14	15	14	9	8	6	8	9	4	9	6
macs2_2.9e9_plus_peak_1648	chr1	25765813	25766017	+	205	3	6	4	4	5	6	5	5	3	4	4	4
macs2_2.9e9_plus_peak_1649	chr1	25766587	25767016	+	430	23	26	24	48	19	19	28	18	34	23	27	17
macs2_2.9e9_plus_peak_1650	chr1	25768194	25768436	+	243	26	21	21	37	13	8	13	20	9	4	13	12
macs2_2.9e9_plus_peak_1651	chr1	25774803	25775034	+	232	9	9	6	11	2	5	1	5	12	4	3	1
macs2_2.9e9_plus_peak_1652	chr1	25775416	25775840	+	425	6	12	6	7	2	3	5	8	5	3	2	7
macs2_2.9e9_plus_peak_1653	chr1	25776403	25776628	+	226	4	5	5	9	1	6	2	4	2	2	5	3
macs2_2.9e9_plus_peak_1654	chr1	25778309	25778515	+	207	9	6	11	4	8	5	3	7	6	3	4	5
macs2_2.9e9_plus_peak_1655	chr1	25780042	25780258	+	217	9	4	11	8	6	8	6	5	10	4	3	4
macs2_2.9e9_plus_peak_1656	chr1	25783125	25783509	+	385	29	26	13	24	12	10	7	21	12	15	18	15
macs2_2.9e9_plus_peak_1657	chr1	25784834	25785141	+	308	23	25	8	21	6	7	9	19	14	11	12	10
macs2_2.9e9_plus_peak_1658	chr1	25789859	25790317	+	459	5	5	7	4	2	0	2	3	4	1	4	3
macs2_2.9e9_plus_peak_1659	chr1	25795196	25795477	+	282	7	0	3	3	0	2	1	3	2	2	3	2
macs2_2.9e9_plus_peak_1660	chr1	25801852	25802184	+	333	14	13	14	11	4	16	2	9	10	8	11	12
macs2_2.9e9_plus_peak_1661	chr1	25806282	25806524	+	243	3	8	10	4	0	7	6	5	4	1	9	1
macs2_2.9e9_plus_peak_1662	chr1	25807316	25807551	+	236	11	4	5	7	0	2	6	5	6	4	5	6
macs2_2.9e9_plus_peak_1663	chr1	25810656	25810946	+	291	28	17	9	14	12	7	9	10	9	18	7	13
macs2_2.9e9_plus_peak_1664	chr1	25812122	25812454	+	333	46	39	20	22	19	19	13	14	23	27	21	18
macs2_2.9e9_plus_peak_1665	chr1	25815704	25815908	+	205	17	15	13	8	3	1	9	5	5	4	11	5
macs2_2.9e9_plus_peak_1666	chr1	25816169	25816581	+	413	26	27	26	13	3	17	13	11	12	10	3	10
macs2_2.9e9_plus_peak_1667	chr1	25824958	25825366	+	409	171	138	93	101	44	78	57	76	103	74	71	73
macs2_2.9e9_plus_peak_1668	chr1	25825838	25826061	+	224	6	7	1	7	2	8	3	5	7	5	7	5
macs2_2.9e9_plus_peak_1669	chr1	25826270	25826819	+	550	79	75	39	56	11	28	31	28	52	56	30	40
macs2_2.9e9_plus_peak_1670	chr1	25830903	25831102	+	200	2	5	0	2	1	1	0	1	3	1	2	4
macs2_2.9e9_plus_peak_1671	chr1	25873372	25873577	+	206	3	2	0	1	3	0	0	1	3	0	1	1
macs2_2.9e9_plus_peak_1672	chr1	25880098	25880380	+	283	20	14	17	25	23	17	10	20	31	18	26	23
macs2_2.9e9_plus_peak_1673	chr1	25889681	25890058	+	378	4	6	5	4	4	7	4	5	3	2	8	1
macs2_2.9e9_plus_peak_1674	chr1	25894993	25895513	+	521	328	285	297	291	194	212	179	224	372	294	360	353
macs2_2.9e9_plus_peak_1675	chr1	25902914	25903113	+	200	0	1	0	4	0	0	0	2	2	0	0	0
macs2_2.9e9_plus_peak_1676	chr1	25931357	25931577	+	221	1	3	1	0	0	0	1	0	1	0	1	0
macs2_2.9e9_plus_peak_1677	chr1	25947052	25947271	+	220	1	1	1	1	2	0	0	0	0	1	0	3
macs2_2.9e9_plus_peak_1678	chr1	25952206	25952694	+	489	11	4	9	4	3	8	6	5	14	12	6	8
macs2_2.9e9_plus_peak_1679	chr1	25954282	25954481	+	200	0	2	1	1	0	1	0	0	3	1	3	0
macs2_2.9e9_plus_peak_1680	chr1	25972823	25973390	+	568	2	3	4	2	3	3	5	2	10	2	6	3
macs2_2.9e9_plus_peak_1681	chr1	25993878	25994092	+	215	3	1	2	1	2	2	3	0	1	2	1	0
macs2_2.9e9_plus_peak_1682	chr1	26005283	26005613	+	331	2	3	5	2	0	1	2	2	3	6	1	1
macs2_2.9e9_plus_peak_1683	chr1	26014509	26014764	+	256	4	2	3	1	2	1	1	1	5	2	0	4
macs2_2.9e9_plus_peak_1684	chr1	26064516	26064742	+	227	2	3	1	3	0	2	2	0	3	0	0	1
macs2_2.9e9_plus_peak_1685	chr1	26071907	26072128	+	222	4	5	2	6	1	0	3	1	0	4	2	2
macs2_2.9e9_plus_peak_1686	chr1	26101156	26101378	+	223	1	2	2	0	1	1	0	0	1	0	1	1
macs2_2.9e9_plus_peak_1687	chr1	26110583	26111054	+	472	28	39	22	26	10	15	6	16	8	7	17	8
macs2_2.9e9_plus_peak_1688	chr1	26112582	26112789	+	208	5	5	4	3	1	3	0	1	1	0	1	3
macs2_2.9e9_plus_peak_1689	chr1	26127576	26127775	+	200	2	2	1	0	1	1	1	0	2	2	0	1
macs2_2.9e9_plus_peak_1690	chr1	26128047	26128314	+	268	14	7	6	9	5	2	4	4	8	3	4	5
macs2_2.9e9_plus_peak_1691	chr1	26128399	26128615	+	217	5	1	4	0	0	1	1	0	0	1	1	1
macs2_2.9e9_plus_peak_1692	chr1	26138731	26138934	+	204	0	1	1	5	1	1	1	0	4	2	0	0
macs2_2.9e9_plus_peak_1693	chr1	26144210	26145045	+	836	245	225	227	253	84	135	96	124	185	139	163	176
macs2_2.9e9_plus_peak_1694	chr1	26151113	26151362	+	250	9	15	6	9	4	7	5	8	10	3	4	8
macs2_2.9e9_plus_peak_1695	chr1	26158549	26158861	+	313	7	7	3	5	5	7	5	4	1	4	5	10
macs2_2.9e9_plus_peak_1696	chr1	26158996	26159568	+	573	108	99	66	83	46	59	58	60	63	48	65	74
macs2_2.9e9_plus_peak_1697	chr1	26187420	26187775	+	356	0	0	0	0	4	1	2	0	5	4	3	1
macs2_2.9e9_plus_peak_1698	chr1	26188260	26188568	+	309	4	1	1	1	1	0	0	1	1	2	1	0
macs2_2.9e9_plus_peak_1699	chr1	26215744	26215950	+	207	42	45	52	43	16	44	15	30	53	54	23	38
macs2_2.9e9_plus_peak_1700	chr1	26362827	26363047	+	221	5	1	4	3	0	0	0	0	5	1	0	1
macs2_2.9e9_plus_peak_1701	chr1	26427681	26428018	+	338	1	2	0	0	2	0	2	2	4	0	2	1
macs2_2.9e9_plus_peak_1702	chr1	26439752	26440123	+	372	4	7	6	4	8	4	2	8	7	6	3	4
macs2_2.9e9_plus_peak_1703	chr1	26451614	26452166	+	553	59	64	59	69	23	64	16	46	86	77	36	76
macs2_2.9e9_plus_peak_1704	chr1	26488956	26489224	+	269	1	4	2	1	2	1	0	1	7	3	10	7
macs2_2.9e9_plus_peak_1705	chr1	26489480	26489731	+	252	1	0	1	2	2	5	0	4	6	5	3	1
macs2_2.9e9_plus_peak_1706	chr1	26490273	26490550	+	278	5	2	4	2	2	3	1	0	3	5	6	3
macs2_2.9e9_plus_peak_1707	chr1	26496522	26496848	+	327	12	8	6	0	3	5	7	7	2	1	2	6
macs2_2.9e9_plus_peak_1708	chr1	26496929	26497497	+	569	367	274	166	233	157	237	190	186	349	282	249	248
macs2_2.9e9_plus_peak_1709	chr1	26505728	26505957	+	230	3	1	3	4	4	3	3	3	9	1	6	6
macs2_2.9e9_plus_peak_1710	chr1	26506502	26506729	+	228	1	3	3	2	2	1	1	0	1	2	7	1
macs2_2.9e9_plus_peak_1711	chr1	26516233	26516495	+	263	3	2	3	3	1	2	1	0	0	2	4	3
macs2_2.9e9_plus_peak_1712	chr1	26547770	26548207	+	438	22	20	50	43	44	51	33	32	48	28	29	26
macs2_2.9e9_plus_peak_1713	chr1	26561201	26561574	+	374	1	2	3	4	0	0	4	0	6	3	0	0
macs2_2.9e9_plus_peak_1714	chr1	26566295	26566544	+	250	1	2	1	2	4	2	1	3	4	1	1	0
macs2_2.9e9_plus_peak_1715	chr1	26568893	26569181	+	289	9	7	7	5	0	6	1	7	3	11	4	5
macs2_2.9e9_plus_peak_1716	chr1	26573112	26573456	+	345	21	27	22	35	11	25	24	21	41	16	29	35
macs2_2.9e9_plus_peak_1717	chr1	26573616	26574050	+	435	10	12	8	4	8	10	9	3	8	18	6	15
macs2_2.9e9_plus_peak_1718	chr1	26580573	26581040	+	468	15	21	16	18	4	11	8	9	11	35	20	11
macs2_2.9e9_plus_peak_1719	chr1	26586148	26586446	+	299	23	28	27	41	18	13	15	21	37	18	42	22
macs2_2.9e9_plus_peak_1720	chr1	26587937	26588316	+	380	50	65	35	65	34	36	21	26	45	34	22	50
macs2_2.9e9_plus_peak_1721	chr1	26588832	26589107	+	276	23	22	9	6	12	10	10	6	15	12	9	12
macs2_2.9e9_plus_peak_1722	chr1	26589924	26590302	+	379	28	31	28	26	16	15	12	18	34	18	27	25
macs2_2.9e9_plus_peak_1723	chr1	26594932	26595134	+	203	10	14	10	17	10	3	3	9	19	15	26	8
macs2_2.9e9_plus_peak_1724	chr1	26597663	26598103	+	441	8	11	6	11	4	7	5	3	10	6	5	6
macs2_2.9e9_plus_peak_1725	chr1	26598573	26598772	+	200	2	2	1	5	1	3	1	3	6	1	4	2
macs2_2.9e9_plus_peak_1726	chr1	26600855	26601216	+	362	34	30	28	40	18	25	21	22	51	40	34	28
macs2_2.9e9_plus_peak_1727	chr1	26604790	26605428	+	639	248	252	162	178	71	143	113	148	190	198	150	204
macs2_2.9e9_plus_peak_1728	chr1	26607685	26608132	+	448	247	167	111	97	50	77	67	52	86	87	83	53
macs2_2.9e9_plus_peak_1729	chr1	26759828	26760240	+	413	2	2	1	6	4	2	7	2	1	2	2	0
macs2_2.9e9_plus_peak_1730	chr1	26764776	26765337	+	562	21	7	9	10	2	7	6	12	8	9	8	7
macs2_2.9e9_plus_peak_1731	chr1	26765730	26766151	+	422	10	10	10	11	2	5	4	4	5	9	7	3
macs2_2.9e9_plus_peak_1732	chr1	26769253	26769641	+	389	10	4	1	5	16	2	4	2	13	6	10	4
macs2_2.9e9_plus_peak_1733	chr1	26771099	26771378	+	280	7	9	3	5	4	3	2	2	7	10	8	1
macs2_2.9e9_plus_peak_1734	chr1	26774962	26775258	+	297	18	16	8	9	4	10	7	4	10	3	13	11
macs2_2.9e9_plus_peak_1735	chr1	26779121	26779404	+	284	10	10	2	18	6	5	8	8	9	6	8	5
macs2_2.9e9_plus_peak_1736	chr1	26783925	26784200	+	276	11	23	4	14	3	5	4	5	7	6	3	9
macs2_2.9e9_plus_peak_1737	chr1	26785126	26785394	+	269	4	3	0	3	3	3	1	0	4	2	3	0
macs2_2.9e9_plus_peak_1738	chr1	26795580	26795853	+	274	5	14	9	14	6	9	5	11	7	3	9	5
macs2_2.9e9_plus_peak_1739	chr1	26797459	26797880	+	422	115	94	43	50	16	37	21	39	50	53	61	48
macs2_2.9e9_plus_peak_1740	chr1	26800311	26800709	+	399	77	52	88	80	65	68	82	53	111	44	87	58
macs2_2.9e9_plus_peak_1741	chr1	26801113	26801315	+	203	42	50	42	48	14	19	28	23	44	40	30	37
macs2_2.9e9_plus_peak_1742	chr1	26801673	26802398	+	726	20	16	26	13	4	9	5	3	10	12	2	11
macs2_2.9e9_plus_peak_1743	chr1	26802792	26803225	+	434	47	40	35	33	24	33	26	23	34	24	31	34
macs2_2.9e9_plus_peak_1744	chr1	26803889	26804106	+	218	9	6	8	8	5	7	5	3	13	7	9	12
macs2_2.9e9_plus_peak_1745	chr1	26810077	26810276	+	200	2	0	0	0	0	2	2	0	2	1	3	0
macs2_2.9e9_plus_peak_1746	chr1	26862468	26862765	+	298	6	1	2	6	3	4	2	2	12	6	6	3
macs2_2.9e9_plus_peak_1747	chr1	26865846	26866050	+	205	2	3	1	0	0	1	1	0	0	6	0	3
macs2_2.9e9_plus_peak_1748	chr1	26870846	26871106	+	261	3	4	4	5	0	3	0	0	2	2	3	5
macs2_2.9e9_plus_peak_1749	chr1	26875181	26875492	+	312	7	8	6	8	3	1	7	5	5	2	7	5
macs2_2.9e9_plus_peak_1750	chr1	26895456	26895800	+	345	7	2	5	6	4	0	2	1	5	2	9	5
macs2_2.9e9_plus_peak_1751	chr1	26900986	26901659	+	674	200	149	122	112	55	90	64	102	125	135	144	149
macs2_2.9e9_plus_peak_1752	chr1	26948953	26949256	+	304	0	2	0	0	1	1	0	0	3	4	0	0
macs2_2.9e9_plus_peak_1753	chr1	26951358	26951579	+	222	1	1	0	5	1	1	1	7	3	3	2	2
macs2_2.9e9_plus_peak_1754	chr1	27019798	27020213	+	416	10	4	1	1	4	3	0	2	9	6	6	6
macs2_2.9e9_plus_peak_1755	chr1	27029018	27029628	+	611	25	29	20	20	15	11	5	12	13	14	18	13
macs2_2.9e9_plus_peak_1756	chr1	27031208	27031470	+	263	18	8	18	11	6	9	7	10	16	17	11	15
macs2_2.9e9_plus_peak_1757	chr1	27042130	27042426	+	297	24	15	9	11	8	6	5	7	11	10	11	5
macs2_2.9e9_plus_peak_1758	chr1	27042980	27043265	+	286	19	14	14	12	3	3	1	9	11	10	6	5
macs2_2.9e9_plus_peak_1759	chr1	27046342	27046543	+	202	7	12	8	9	1	6	3	7	10	7	9	8
macs2_2.9e9_plus_peak_1760	chr1	27046667	27046943	+	277	10	7	7	7	4	8	8	2	14	7	9	5
macs2_2.9e9_plus_peak_1761	chr1	27047240	27047481	+	242	7	5	9	11	2	4	4	7	12	7	9	8
macs2_2.9e9_plus_peak_1762	chr1	27062672	27062899	+	228	8	7	12	12	2	2	4	3	8	7	7	6
macs2_2.9e9_plus_peak_1763	chr1	27065946	27066616	+	671	138	111	98	112	30	57	40	53	89	92	95	66
macs2_2.9e9_plus_peak_1764	chr1	27070156	27070410	+	255	19	20	12	23	5	3	5	5	11	10	7	7
macs2_2.9e9_plus_peak_1765	chr1	27073940	27074295	+	356	18	13	16	21	3	5	6	6	8	13	12	5
macs2_2.9e9_plus_peak_1766	chr1	27082954	27083184	+	231	2	6	6	6	1	0	3	1	2	3	6	3
macs2_2.9e9_plus_peak_1767	chr1	27084854	27085244	+	391	43	60	37	56	24	20	25	28	34	29	54	34
macs2_2.9e9_plus_peak_1768	chr1	27092214	27092653	+	440	25	23	22	24	10	21	11	9	17	19	9	18
macs2_2.9e9_plus_peak_1769	chr1	27094356	27094609	+	254	3	3	5	7	7	3	6	2	7	2	7	8
macs2_2.9e9_plus_peak_1770	chr1	27095301	27095610	+	310	16	11	8	18	2	2	5	5	7	3	5	2
macs2_2.9e9_plus_peak_1771	chr1	27105571	27105836	+	266	86	53	37	65	42	38	43	38	72	67	75	51
macs2_2.9e9_plus_peak_1772	chr1	27107349	27108058	+	710	311	282	204	302	113	194	138	182	281	223	272	231
macs2_2.9e9_plus_peak_1773	chr1	27108180	27108698	+	519	253	169	134	165	63	117	88	97	204	212	120	181
macs2_2.9e9_plus_peak_1774	chr1	27115505	27115704	+	200	1	1	2	2	1	1	0	1	2	0	0	0
macs2_2.9e9_plus_peak_1775	chr1	27116684	27116932	+	249	7	3	2	0	3	2	3	0	0	5	3	0
macs2_2.9e9_plus_peak_1776	chr1	27124308	27124999	+	692	104	85	87	86	35	54	48	54	57	63	64	62
macs2_2.9e9_plus_peak_1777	chr1	27136397	27136695	+	299	1	1	8	5	1	4	3	0	8	3	6	4
macs2_2.9e9_plus_peak_1778	chr1	27137720	27137959	+	240	3	4	0	2	1	5	1	3	1	0	1	1
macs2_2.9e9_plus_peak_1779	chr1	27167330	27167589	+	260	2	0	1	1	0	0	1	0	0	0	1	1
macs2_2.9e9_plus_peak_1780	chr1	27172116	27172318	+	203	4	3	1	4	5	1	3	0	14	3	6	9
macs2_2.9e9_plus_peak_1781	chr1	27179366	27179677	+	312	12	14	26	16	8	7	10	10	23	17	23	13
macs2_2.9e9_plus_peak_1782	chr1	27181710	27182331	+	622	106	105	86	73	42	50	49	51	87	94	87	104
macs2_2.9e9_plus_peak_1783	chr1	27190795	27191068	+	274	19	20	13	16	2	12	7	8	30	47	71	73
macs2_2.9e9_plus_peak_1784	chr1	27210427	27210632	+	206	0	0	2	0	1	0	1	0	0	0	0	1
macs2_2.9e9_plus_peak_1785	chr1	27216891	27217095	+	205	2	0	2	1	0	1	0	0	3	1	3	0
macs2_2.9e9_plus_peak_1786	chr1	27227038	27227308	+	271	2	3	2	4	1	0	1	0	0	2	3	1
macs2_2.9e9_plus_peak_1787	chr1	27233179	27233387	+	209	0	1	1	1	0	0	0	0	3	1	1	0
macs2_2.9e9_plus_peak_1788	chr1	27248254	27248555	+	302	8	3	7	0	3	6	1	1	6	4	4	3
macs2_2.9e9_plus_peak_1789	chr1	27253435	27253746	+	312	1	6	7	8	4	6	5	3	14	13	21	7
macs2_2.9e9_plus_peak_1790	chr1	27254400	27254739	+	340	8	4	4	1	1	9	0	4	14	12	14	6
macs2_2.9e9_plus_peak_1791	chr1	27255640	27256019	+	380	12	16	14	13	11	17	7	12	38	28	39	21
macs2_2.9e9_plus_peak_1792	chr1	27256986	27257185	+	200	7	1	1	1	5	1	3	0	5	3	10	1
macs2_2.9e9_plus_peak_1793	chr1	27259863	27260063	+	201	1	0	1	2	0	2	0	0	4	7	5	5
macs2_2.9e9_plus_peak_1794	chr1	27262136	27262416	+	281	7	3	0	7	3	1	6	7	10	17	8	7
macs2_2.9e9_plus_peak_1795	chr1	27268045	27268344	+	300	17	24	13	17	21	15	4	14	21	14	30	22
macs2_2.9e9_plus_peak_1796	chr1	27269492	27269725	+	234	30	13	18	7	7	7	3	11	8	9	6	16
macs2_2.9e9_plus_peak_1797	chr1	27271944	27272344	+	401	90	54	64	36	20	47	31	42	68	67	20	58
macs2_2.9e9_plus_peak_1798	chr1	27272634	27273474	+	841	376	295	355	316	213	296	212	251	519	410	470	381
macs2_2.9e9_plus_peak_1799	chr1	27279397	27279600	+	204	0	0	2	0	2	1	1	1	2	0	4	1
macs2_2.9e9_plus_peak_1800	chr1	27306760	27307083	+	324	7	3	7	4	4	3	3	5	5	1	6	0
macs2_2.9e9_plus_peak_1801	chr1	27321972	27322223	+	252	4	2	3	6	3	2	3	1	6	2	7	3
macs2_2.9e9_plus_peak_1802	chr1	27323704	27323937	+	234	6	13	8	19	1	4	3	6	7	10	11	7
macs2_2.9e9_plus_peak_1803	chr1	27326896	27327461	+	566	58	49	44	57	25	34	16	23	46	51	34	41
macs2_2.9e9_plus_peak_1804	chr1	27339863	27340259	+	397	8	1	12	22	11	11	6	9	17	15	23	20
macs2_2.9e9_plus_peak_1805	chr1	27491691	27491922	+	232	0	0	0	2	1	0	1	2	4	0	0	0
macs2_2.9e9_plus_peak_1806	chr1	27533736	27534035	+	300	3	10	16	5	13	13	7	12	19	14	17	22
macs2_2.9e9_plus_peak_1807	chr1	27535014	27535251	+	238	4	0	3	2	0	0	0	0	0	0	1	0
macs2_2.9e9_plus_peak_1808	chr1	27563257	27563467	+	211	5	1	2	1	0	0	2	2	5	4	0	4
macs2_2.9e9_plus_peak_1809	chr1	27567333	27567588	+	256	7	4	9	7	5	2	0	6	9	10	7	8
macs2_2.9e9_plus_peak_1810	chr1	27570398	27570813	+	416	6	10	5	14	6	6	14	5	16	14	13	9
macs2_2.9e9_plus_peak_1811	chr1	27575031	27575230	+	200	4	0	1	1	0	1	2	2	3	1	1	3
macs2_2.9e9_plus_peak_1812	chr1	27578730	27578938	+	209	3	3	4	0	2	0	2	2	9	6	5	3
macs2_2.9e9_plus_peak_1813	chr1	27580306	27580725	+	420	14	9	11	11	10	5	11	6	36	22	16	33
macs2_2.9e9_plus_peak_1814	chr1	27583622	27583837	+	216	8	6	5	2	2	3	4	0	14	6	4	7
macs2_2.9e9_plus_peak_1815	chr1	27590308	27590507	+	200	4	2	1	2	0	0	0	1	1	0	0	0
macs2_2.9e9_plus_peak_1816	chr1	27590675	27590894	+	220	3	7	2	2	1	3	0	4	4	2	0	1
macs2_2.9e9_plus_peak_1817	chr1	27595573	27595800	+	228	5	1	1	1	3	3	2	9	1	1	7	2
macs2_2.9e9_plus_peak_1818	chr1	27600695	27600941	+	247	5	3	1	6	0	1	2	1	2	1	0	0
macs2_2.9e9_plus_peak_1819	chr1	27628676	27629182	+	507	15	7	7	17	6	10	9	4	3	4	5	4
macs2_2.9e9_plus_peak_1820	chr1	27629660	27629867	+	208	1	1	4	6	2	3	2	2	2	3	5	1
macs2_2.9e9_plus_peak_1821	chr1	27634495	27635182	+	688	110	69	64	83	45	63	39	55	57	60	58	50
macs2_2.9e9_plus_peak_1822	chr1	27650725	27650941	+	217	1	3	1	2	2	6	5	1	4	2	5	1
macs2_2.9e9_plus_peak_1823	chr1	27652713	27653153	+	441	24	33	33	25	14	7	19	18	30	31	21	23
macs2_2.9e9_plus_peak_1824	chr1	27656020	27656309	+	290	9	4	6	8	5	8	3	5	8	6	12	3
macs2_2.9e9_plus_peak_1825	chr1	27662507	27663029	+	523	89	50	51	53	21	34	38	43	55	55	48	47
macs2_2.9e9_plus_peak_1826	chr1	27670101	27670447	+	347	2	2	0	4	1	2	2	2	2	7	3	3
macs2_2.9e9_plus_peak_1827	chr1	27671231	27671444	+	214	0	0	1	4	1	1	4	4	1	4	2	1
macs2_2.9e9_plus_peak_1828	chr1	27674819	27675022	+	204	1	1	0	1	1	1	1	0	5	1	2	1
macs2_2.9e9_plus_peak_1829	chr1	27675151	27675353	+	203	0	1	1	2	0	1	3	1	2	5	9	0
macs2_2.9e9_plus_peak_1830	chr1	27679833	27680135	+	303	8	5	6	2	1	6	2	5	5	7	8	8
macs2_2.9e9_plus_peak_1831	chr1	27680215	27680566	+	352	17	13	10	5	8	15	9	7	30	22	21	11
macs2_2.9e9_plus_peak_1832	chr1	27694722	27695106	+	385	3	5	2	8	2	4	7	1	6	2	13	5
macs2_2.9e9_plus_peak_1833	chr1	27697115	27697314	+	200	0	0	3	1	0	1	0	0	2	3	2	0
macs2_2.9e9_plus_peak_1834	chr1	27704565	27704798	+	234	4	4	0	1	0	0	1	1	2	1	1	1
macs2_2.9e9_plus_peak_1835	chr1	27711270	27711471	+	202	0	0	0	0	0	0	0	0	0	0	0	0
macs2_2.9e9_plus_peak_1836	chr1	27722022	27722463	+	442	3	1	5	5	1	3	1	2	7	6	9	4
macs2_2.9e9_plus_peak_1837	chr1	27856927	27857332	+	406	4	10	6	6	1	4	6	7	4	5	8	6
macs2_2.9e9_plus_peak_1838	chr1	27857496	27857745	+	250	1	5	5	5	2	2	1	2	9	0	11	2
macs2_2.9e9_plus_peak_1839	chr1	27860970	27861169	+	200	4	3	0	1	0	0	0	0	2	1	0	6
macs2_2.9e9_plus_peak_1840	chr1	27975974	27976593	+	620	21	25	15	23	6	18	9	9	23	18	16	14
macs2_2.9e9_plus_peak_1841	chr1	27992615	27992882	+	268	7	4	1	2	3	2	2	3	2	1	2	2
macs2_2.9e9_plus_peak_1842	chr1	28052587	28052802	+	216	1	1	1	0	0	0	1	0	2	1	0	1
macs2_2.9e9_plus_peak_1843	chr1	28059153	28059359	+	207	3	1	1	2	1	1	2	5	4	5	3	3
macs2_2.9e9_plus_peak_1844	chr1	28060560	28060781	+	222	2	3	2	7	2	2	5	5	11	6	4	5
macs2_2.9e9_plus_peak_1845	chr1	28064273	28064522	+	250	6	9	1	5	5	2	2	8	4	8	6	6
macs2_2.9e9_plus_peak_1846	chr1	28066192	28066466	+	275	3	6	6	4	1	3	2	6	8	8	6	2
macs2_2.9e9_plus_peak_1847	chr1	28070180	28070568	+	389	11	18	6	6	8	7	4	5	16	2	13	10
macs2_2.9e9_plus_peak_1848	chr1	28071200	28071498	+	299	25	12	4	13	6	12	9	10	12	17	5	17
macs2_2.9e9_plus_peak_1849	chr1	28073475	28073694	+	220	6	4	5	1	1	2	1	3	9	1	6	6
macs2_2.9e9_plus_peak_1850	chr1	28075623	28075825	+	203	4	2	2	3	3	2	1	0	3	1	1	4
macs2_2.9e9_plus_peak_1851	chr1	28081723	28081971	+	249	20	8	4	12	11	5	10	7	15	12	10	15
macs2_2.9e9_plus_peak_1852	chr1	28087873	28088591	+	719	113	85	103	125	52	82	45	75	154	106	142	110
macs2_2.9e9_plus_peak_1853	chr1	28089250	28089743	+	494	101	103	61	77	35	67	39	57	69	81	79	72
macs2_2.9e9_plus_peak_1854	chr1	28100419	28100618	+	200	6	5	1	0	3	1	1	1	3	2	0	2
macs2_2.9e9_plus_peak_1855	chr1	28102189	28102716	+	528	51	32	30	46	18	25	17	21	29	29	27	20
macs2_2.9e9_plus_peak_1856	chr1	28104309	28104522	+	214	7	4	9	9	3	3	5	2	14	3	3	7
macs2_2.9e9_plus_peak_1857	chr1	28114072	28114275	+	204	4	3	5	2	3	3	2	1	2	1	3	0
macs2_2.9e9_plus_peak_1858	chr1	28114655	28114872	+	218	1	4	6	2	0	0	1	4	2	1	1	3
macs2_2.9e9_plus_peak_1859	chr1	28117351	28117557	+	207	10	11	6	6	5	3	2	3	3	0	10	0
macs2_2.9e9_plus_peak_1860	chr1	28120046	28120351	+	306	15	14	20	14	9	10	8	9	14	5	11	5
macs2_2.9e9_plus_peak_1861	chr1	28125087	28125556	+	470	29	19	25	34	17	19	26	19	34	10	20	16
macs2_2.9e9_plus_peak_1862	chr1	28127780	28128025	+	246	31	30	34	43	22	13	15	21	20	24	19	21
macs2_2.9e9_plus_peak_1863	chr1	28128268	28128704	+	437	31	16	35	23	9	19	7	17	18	8	17	20
macs2_2.9e9_plus_peak_1864	chr1	28129498	28129861	+	364	25	36	20	47	21	17	12	10	20	11	20	22
macs2_2.9e9_plus_peak_1865	chr1	28130437	28130653	+	217	23	34	24	16	9	10	9	8	29	7	16	10
macs2_2.9e9_plus_peak_1866	chr1	28130890	28131118	+	229	24	32	21	21	10	16	15	15	22	14	24	9
macs2_2.9e9_plus_peak_1867	chr1	28134596	28134828	+	233	22	16	10	16	6	8	9	16	6	8	6	5
macs2_2.9e9_plus_peak_1868	chr1	28136700	28136982	+	283	26	29	19	15	10	14	13	18	11	7	16	11
macs2_2.9e9_plus_peak_1869	chr1	28137702	28137921	+	220	19	10	4	9	6	7	7	9	9	2	8	7
macs2_2.9e9_plus_peak_1870	chr1	28138682	28138962	+	281	22	30	11	15	14	11	7	7	9	11	18	13
macs2_2.9e9_plus_peak_1871	chr1	28144406	28144707	+	302	38	37	23	37	19	14	15	14	31	14	24	15
macs2_2.9e9_plus_peak_1872	chr1	28145569	28145873	+	305	31	29	17	32	4	16	13	10	16	23	21	14
macs2_2.9e9_plus_peak_1873	chr1	28149674	28151080	+	1407	738	742	292	388	207	264	160	205	436	350	398	375
macs2_2.9e9_plus_peak_1874	chr1	28157916	28158144	+	229	5	1	2	3	0	2	5	5	4	2	3	2
macs2_2.9e9_plus_peak_1875	chr1	28160951	28161184	+	234	111	68	65	38	19	28	34	34	15	6	18	15
macs2_2.9e9_plus_peak_1876	chr1	28164174	28164374	+	201	10	7	5	5	3	4	4	4	3	4	4	2
macs2_2.9e9_plus_peak_1877	chr1	28164582	28164868	+	287	22	12	9	19	13	12	7	11	19	15	9	14
macs2_2.9e9_plus_peak_1878	chr1	28166424	28166672	+	249	16	20	17	20	11	9	11	16	14	5	11	4
macs2_2.9e9_plus_peak_1879	chr1	28167660	28167877	+	218	8	5	6	5	4	7	2	6	10	10	12	15
macs2_2.9e9_plus_peak_1880	chr1	28168747	28168969	+	223	9	26	20	29	16	16	9	10	8	14	10	11
macs2_2.9e9_plus_peak_1881	chr1	28170030	28170425	+	396	20	15	19	23	15	8	7	17	26	15	19	15
macs2_2.9e9_plus_peak_1882	chr1	28176740	28177213	+	474	18	10	9	16	13	17	13	13	19	15	40	23
macs2_2.9e9_plus_peak_1883	chr1	28177489	28178281	+	793	574	523	401	500	255	418	274	376	620	494	669	541
macs2_2.9e9_plus_peak_1884	chr1	28183764	28183978	+	215	4	4	3	1	1	1	0	2	2	1	8	6
macs2_2.9e9_plus_peak_1885	chr1	28200917	28201132	+	216	2	1	0	4	1	1	0	0	1	1	3	4
macs2_2.9e9_plus_peak_1886	chr1	28204558	28204785	+	228	7	7	2	8	6	2	3	1	5	3	4	2
macs2_2.9e9_plus_peak_1887	chr1	28208233	28208472	+	240	12	10	11	11	7	3	6	5	4	9	12	5
macs2_2.9e9_plus_peak_1888	chr1	28212958	28213310	+	353	10	18	8	11	4	8	10	11	16	10	22	19
macs2_2.9e9_plus_peak_1889	chr1	28218378	28218585	+	208	0	1	1	2	0	0	0	2	0	0	4	1
macs2_2.9e9_plus_peak_1890	chr1	28222101	28222303	+	203	2	0	0	0	2	0	0	0	0	2	1	0
macs2_2.9e9_plus_peak_1891	chr1	28225921	28226166	+	246	1	4	4	8	2	3	3	4	5	3	7	3
macs2_2.9e9_plus_peak_1892	chr1	28261922	28262221	+	300	13	23	10	8	1	7	6	8	26	16	26	14
macs2_2.9e9_plus_peak_1893	chr1	28262824	28263077	+	254	11	4	10	6	3	6	2	7	14	10	6	9
macs2_2.9e9_plus_peak_1894	chr1	28270423	28270687	+	265	1	2	0	2	2	0	2	0	1	2	1	0
macs2_2.9e9_plus_peak_1895	chr1	28272754	28273016	+	263	6	6	4	6	8	3	3	2	3	6	8	7
macs2_2.9e9_plus_peak_1896	chr1	28282858	28283292	+	435	7	8	4	9	5	5	4	4	9	2	6	3
macs2_2.9e9_plus_peak_1897	chr1	28285369	28285793	+	425	50	47	8	30	11	12	11	12	20	27	31	12
macs2_2.9e9_plus_peak_1898	chr1	28294267	28294742	+	476	156	153	118	145	69	85	85	89	140	106	139	128
macs2_2.9e9_plus_peak_1899	chr1	28428476	28428770	+	295	1	0	2	7	2	1	0	0	4	1	1	1
macs2_2.9e9_plus_peak_1900	chr1	28481256	28481490	+	235	0	7	1	2	2	2	2	1	0	0	2	1
macs2_2.9e9_plus_peak_1901	chr1	28499496	28499775	+	280	6	8	31	34	18	20	16	17	35	12	30	50
macs2_2.9e9_plus_peak_1902	chr1	28562639	28563134	+	496	962	486	643	572	360	504	380	390	821	793	531	637
macs2_2.9e9_plus_peak_1903	chr1	28564207	28564744	+	538	4358	4057	3354	3524	1953	2803	2197	2605	5021	3863	4821	3565
macs2_2.9e9_plus_peak_1904	chr1	28573207	28573519	+	313	3	1	3	2	1	2	0	1	2	3	3	3
macs2_2.9e9_plus_peak_1905	chr1	28577062	28577261	+	200	0	2	0	0	1	2	0	0	2	0	1	2
macs2_2.9e9_plus_peak_1906	chr1	28587664	28587926	+	263	20	25	28	17	15	9	8	7	26	19	25	17
macs2_2.9e9_plus_peak_1907	chr1	28588926	28589248	+	323	54	53	50	78	42	22	24	42	66	33	62	39
macs2_2.9e9_plus_peak_1908	chr1	28590318	28590941	+	624	44	54	45	51	20	27	20	24	38	35	58	35
macs2_2.9e9_plus_peak_1909	chr1	28594016	28594268	+	253	21	13	22	12	9	9	11	4	15	16	11	15
macs2_2.9e9_plus_peak_1910	chr1	28597420	28597655	+	236	12	15	7	10	4	7	4	7	13	9	15	11
macs2_2.9e9_plus_peak_1911	chr1	28600897	28601133	+	237	4	4	3	3	1	2	8	2	8	2	6	1
macs2_2.9e9_plus_peak_1912	chr1	28602631	28603016	+	386	16	23	9	14	5	9	10	7	7	8	10	7
macs2_2.9e9_plus_peak_1913	chr1	28607559	28608102	+	544	741	564	356	486	233	287	255	287	602	641	813	614
macs2_2.9e9_plus_peak_1914	chr1	28608596	28609130	+	535	1242	1333	516	875	430	622	367	508	1098	1074	1314	993
macs2_2.9e9_plus_peak_1915	chr1	28618565	28618819	+	255	0	0	2	0	0	0	0	0	1	0	3	0
macs2_2.9e9_plus_peak_1916	chr1	28634115	28634314	+	200	2	1	0	0	1	0	0	1	0	0	0	0
macs2_2.9e9_plus_peak_1917	chr1	28656153	28656373	+	221	5	1	2	1	2	1	3	0	5	1	1	3
macs2_2.9e9_plus_peak_1918	chr1	28662219	28662621	+	403	100	138	66	101	55	64	58	85	61	84	77	87
macs2_2.9e9_plus_peak_1919	chr1	28696254	28696515	+	262	93	108	38	69	28	29	22	27	42	48	63	45
macs2_2.9e9_plus_peak_1920	chr1	28696798	28697252	+	455	48	38	46	48	26	38	29	39	68	37	66	54
macs2_2.9e9_plus_peak_1921	chr1	28697348	28697564	+	217	9	5	4	3	2	1	1	1	4	0	2	3
macs2_2.9e9_plus_peak_1922	chr1	28701958	28702291	+	334	1	5	10	2	4	2	7	2	13	3	5	2
macs2_2.9e9_plus_peak_1923	chr1	28704242	28704455	+	214	6	6	2	1	1	1	2	5	14	3	15	5
macs2_2.9e9_plus_peak_1924	chr1	28705181	28705462	+	282	4	4	12	6	3	1	1	1	7	6	7	9
macs2_2.9e9_plus_peak_1925	chr1	28709189	28709388	+	200	8	6	1	5	0	2	0	2	0	6	3	1
macs2_2.9e9_plus_peak_1926	chr1	28713675	28713881	+	207	6	8	1	1	4	3	1	4	7	4	10	4
macs2_2.9e9_plus_peak_1927	chr1	28714568	28714837	+	270	15	8	15	8	8	9	7	3	18	13	16	17
macs2_2.9e9_plus_peak_1928	chr1	28715470	28716026	+	557	37	33	19	26	9	11	8	18	34	41	28	31
macs2_2.9e9_plus_peak_1929	chr1	28719332	28719538	+	207	20	17	1	10	8	8	3	8	23	21	31	11
macs2_2.9e9_plus_peak_1930	chr1	28720522	28721028	+	507	35	66	48	44	26	36	37	26	108	62	90	81
macs2_2.9e9_plus_peak_1931	chr1	28726078	28726396	+	319	14	9	13	6	8	8	9	9	22	13	23	14
macs2_2.9e9_plus_peak_1932	chr1	28727502	28727858	+	357	8	7	7	16	1	2	2	5	19	8	14	12
macs2_2.9e9_plus_peak_1933	chr1	28733611	28733849	+	239	4	4	1	5	4	4	7	7	18	10	13	16
macs2_2.9e9_plus_peak_1934	chr1	28733945	28734148	+	204	82	104	35	74	24	27	20	33	29	40	32	50
macs2_2.9e9_plus_peak_1935	chr1	28735780	28736128	+	349	84	99	50	70	22	25	18	31	102	86	91	75
macs2_2.9e9_plus_peak_1936	chr1	28737989	28738555	+	567	69	79	37	44	16	18	24	17	82	87	54	75
macs2_2.9e9_plus_peak_1937	chr1	28740794	28741079	+	286	31	45	18	25	9	8	10	13	44	27	42	31
macs2_2.9e9_plus_peak_1938	chr1	28741681	28741880	+	200	14	12	8	5	2	4	4	1	8	12	11	9
macs2_2.9e9_plus_peak_1939	chr1	28743805	28744009	+	205	6	8	7	6	5	0	0	2	12	10	7	7
macs2_2.9e9_plus_peak_1940	chr1	28744337	28744600	+	264	5	11	14	15	7	7	5	4	22	21	24	13
macs2_2.9e9_plus_peak_1941	chr1	28744690	28744973	+	284	10	11	7	17	8	4	7	3	10	15	21	15
macs2_2.9e9_plus_peak_1942	chr1	28750401	28750600	+	200	0	2	2	2	1	0	0	1	3	6	3	10
macs2_2.9e9_plus_peak_1943	chr1	28753942	28754154	+	213	6	10	1	6	3	2	3	3	10	5	18	4
macs2_2.9e9_plus_peak_1944	chr1	28757573	28757778	+	206	8	6	4	2	1	2	0	2	4	4	8	9
macs2_2.9e9_plus_peak_1945	chr1	28758994	28759257	+	264	32	20	25	33	11	13	11	8	56	44	66	38
macs2_2.9e9_plus_peak_1946	chr1	28763135	28763373	+	239	23	13	7	9	7	5	11	4	21	28	16	24
macs2_2.9e9_plus_peak_1947	chr1	28765691	28766186	+	496	17	14	7	12	9	6	7	7	30	15	41	17
macs2_2.9e9_plus_peak_1948	chr1	28768045	28768251	+	207	2	5	4	2	2	2	1	4	2	3	8	2
macs2_2.9e9_plus_peak_1949	chr1	28769629	28769909	+	281	29	8	10	4	2	2	2	9	19	21	13	15
macs2_2.9e9_plus_peak_1950	chr1	28772196	28772520	+	325	38	18	17	15	6	13	9	10	27	42	39	23
macs2_2.9e9_plus_peak_1951	chr1	28774785	28775067	+	283	24	26	11	17	8	11	7	8	19	19	36	18
macs2_2.9e9_plus_peak_1952	chr1	28779623	28780345	+	723	58	77	43	42	24	35	26	40	76	80	74	58
macs2_2.9e9_plus_peak_1953	chr1	28785432	28785880	+	449	87	88	37	58	34	33	21	44	68	51	53	54
macs2_2.9e9_plus_peak_1954	chr1	28793632	28793844	+	213	3	11	10	10	6	2	3	2	14	10	9	6
macs2_2.9e9_plus_peak_1955	chr1	28794276	28794503	+	228	17	5	8	13	7	7	8	10	9	10	10	6
macs2_2.9e9_plus_peak_1956	chr1	28794999	28795216	+	218	23	23	15	20	7	14	4	9	19	17	20	9
macs2_2.9e9_plus_peak_1957	chr1	28796469	28796685	+	217	17	20	20	14	8	8	5	4	9	10	24	11
macs2_2.9e9_plus_peak_1958	chr1	28797150	28797623	+	474	34	25	25	21	9	12	15	12	19	18	21	18
macs2_2.9e9_plus_peak_1959	chr1	28799645	28799882	+	238	7	11	4	6	7	8	5	3	5	7	5	8
macs2_2.9e9_plus_peak_1960	chr1	28800566	28800768	+	203	6	7	5	5	2	1	13	1	4	5	7	5
macs2_2.9e9_plus_peak_1961	chr1	28802687	28802913	+	227	9	10	4	9	5	4	5	3	11	6	18	5
macs2_2.9e9_plus_peak_1962	chr1	28807046	28807354	+	309	27	29	28	33	13	15	9	15	21	14	23	24
macs2_2.9e9_plus_peak_1963	chr1	28807771	28808102	+	332	123	108	69	108	27	55	41	62	66	49	58	50
macs2_2.9e9_plus_peak_1964	chr1	28808196	28808417	+	222	11	12	13	12	4	8	7	5	15	11	6	10
macs2_2.9e9_plus_peak_1965	chr1	28809717	28810072	+	356	23	21	26	30	11	15	12	13	12	5	17	10
macs2_2.9e9_plus_peak_1966	chr1	28813822	28814133	+	312	33	28	38	34	22	27	12	19	23	20	16	16
macs2_2.9e9_plus_peak_1967	chr1	28815031	28815254	+	224	58	51	78	70	36	53	35	45	48	32	48	32
macs2_2.9e9_plus_peak_1968	chr1	28815429	28815879	+	451	20	36	47	39	14	18	20	25	24	10	20	16
macs2_2.9e9_plus_peak_1969	chr1	28817505	28818041	+	537	61	84	41	71	32	26	27	30	66	42	47	39
macs2_2.9e9_plus_peak_1970	chr1	28818183	28818403	+	221	70	67	40	45	28	28	20	29	68	62	87	51
macs2_2.9e9_plus_peak_1971	chr1	28823900	28824319	+	420	696	619	376	454	241	290	250	305	573	508	598	457
macs2_2.9e9_plus_peak_1972	chr1	28824926	28825695	+	770	86	80	53	50	24	55	32	34	49	55	44	53
macs2_2.9e9_plus_peak_1973	chr1	28826442	28826986	+	545	605	483	261	356	155	232	163	197	445	397	188	303
macs2_2.9e9_plus_peak_1974	chr1	28835357	28836280	+	924	1145	1214	1365	1539	743	694	773	800	1245	840	944	1074
macs2_2.9e9_plus_peak_1975	chr1	28837172	28837512	+	341	88	60	69	64	42	46	55	54	151	55	91	68
macs2_2.9e9_plus_peak_1976	chr1	28841348	28841548	+	201	3	5	5	6	5	8	1	8	12	12	13	7
macs2_2.9e9_plus_peak_1977	chr1	28842120	28842394	+	275	8	10	1	8	0	3	4	6	12	13	19	15
macs2_2.9e9_plus_peak_1978	chr1	28847496	28847725	+	230	18	21	17	29	21	13	13	21	37	20	27	19
macs2_2.9e9_plus_peak_1979	chr1	28849005	28849299	+	295	14	17	15	20	18	17	8	17	34	17	18	16
macs2_2.9e9_plus_peak_1980	chr1	28850965	28851172	+	208	18	6	7	6	10	6	3	11	9	16	20	9
macs2_2.9e9_plus_peak_1981	chr1	28853243	28853502	+	260	19	3	4	9	3	1	7	4	11	4	7	5
macs2_2.9e9_plus_peak_1982	chr1	28854425	28854646	+	222	14	28	16	21	7	12	12	21	28	11	34	31
macs2_2.9e9_plus_peak_1983	chr1	28856439	28856784	+	346	47	33	27	32	17	22	17	29	37	22	16	26
macs2_2.9e9_plus_peak_1984	chr1	28863530	28863757	+	228	7	10	7	11	6	2	3	2	5	7	9	10
macs2_2.9e9_plus_peak_1985	chr1	28864429	28865205	+	777	101	72	74	95	59	72	53	68	116	82	121	78
macs2_2.9e9_plus_peak_1986	chr1	28865315	28865884	+	570	2350	2215	1296	1583	926	1344	971	1164	2386	2345	1514	2121
macs2_2.9e9_plus_peak_1987	chr1	28871658	28871903	+	246	6	3	1	2	1	4	0	2	41	50	30	31
macs2_2.9e9_plus_peak_1988	chr1	28872806	28873171	+	366	12	13	2	6	3	9	2	3	28	47	56	21
macs2_2.9e9_plus_peak_1989	chr1	28880609	28880871	+	263	5	6	8	9	4	1	2	3	8	5	6	5
macs2_2.9e9_plus_peak_1990	chr1	28888778	28889052	+	275	53	51	50	65	35	28	39	44	43	19	50	50
macs2_2.9e9_plus_peak_1991	chr1	28890111	28890460	+	350	12	11	15	16	18	18	11	9	15	13	19	13
macs2_2.9e9_plus_peak_1992	chr1	28891648	28892424	+	777	79	68	64	77	36	37	28	27	42	29	45	38
macs2_2.9e9_plus_peak_1993	chr1	28892666	28892958	+	293	27	35	25	39	13	27	13	14	26	19	31	22
macs2_2.9e9_plus_peak_1994	chr1	28898215	28898584	+	370	17	21	10	12	4	11	6	6	11	12	5	15
macs2_2.9e9_plus_peak_1995	chr1	28900203	28900477	+	275	9	9	9	14	7	5	10	6	12	7	6	3
macs2_2.9e9_plus_peak_1996	chr1	28904038	28904417	+	380	357	405	232	292	145	197	170	207	256	249	233	237
macs2_2.9e9_plus_peak_1997	chr1	28904719	28905183	+	465	106	123	48	71	35	36	44	49	107	75	73	78
macs2_2.9e9_plus_peak_1998	chr1	28922205	28922502	+	298	1	0	0	1	4	2	2	0	0	0	1	3
[truncated: 128,984 more rows]

## Sheet: peaks_minus
# Program:featureCounts v2.0.0; Command:"/home/tbhmbi/software/subread-2.0.0-Linux-x86_64/bin/featureCounts" "-f" "-a" "hg19/macs2/macs2_2.9e9_minus_peaks.narrowPeak.gtf" "-o" "hg19/macs2/fc.macs2_2.9e9_minus_peaks.narrowPeak.gtf.exon.gene_id.mygtf.txt.tmp" "-t" "exon" "-g" "gene_id" "-s" "1" "-O" "hg19/STAR/Ctrl_siRNA1_rep1_N277_S1.bam" "hg19/STAR/Ctrl_siRNA1_rep2_N277_S2.bam" "hg19/STAR/Ctrl_si…
Geneid	Chr	Start	End	Strand	Length	hg19/STAR/Ctrl_siRNA1_rep1_N277_S1.bam	hg19/STAR/Ctrl_siRNA1_rep2_N277_S2.bam	hg19/STAR/Ctrl_siRNA2_rep1_N277_S3.bam	hg19/STAR/Ctrl_siRNA2_rep2_N277_S4.bam	hg19/STAR/NONO_siRNA1_rep1_N277_S9.bam	hg19/STAR/NONO_siRNA1_rep2_N277_S10.bam	hg19/STAR/NONO_siRNA2_rep1_N277_S11.bam	hg19/STAR/NONO_siRNA2_rep2_N277_S12.bam	hg19/STAR/SFPQ_siRNA1_rep1_N277_S5.bam	hg19/STAR/SFPQ_siRNA1_rep2_N277_S6.bam	hg19/STAR/SFPQ_siRNA2_rep1_N277_S7.bam	hg19/STAR/SFPQ_siRNA2_rep2_N277_S8.bam
macs2_2.9e9_minus_peak_1	chr1	14230	14700	-	471	0	0	0	0	0	0	1	0	0	0	0	2
macs2_2.9e9_minus_peak_2	chr1	20649	20863	-	215	0	0	0	0	0	0	0	0	0	0	0	0
macs2_2.9e9_minus_peak_3	chr1	21267	21562	-	296	0	0	0	0	0	0	0	0	0	0	0	0
macs2_2.9e9_minus_peak_4	chr1	28467	28813	-	347	0	1	0	0	0	0	0	0	0	0	0	0
macs2_2.9e9_minus_peak_5	chr1	87197	87405	-	209	0	0	0	0	0	0	0	0	0	0	0	0
macs2_2.9e9_minus_peak_6	chr1	98949	99185	-	237	0	0	0	0	0	0	0	1	0	0	0	1
macs2_2.9e9_minus_peak_7	chr1	118210	118423	-	214	0	0	0	0	0	0	0	0	0	0	0	0
macs2_2.9e9_minus_peak_8	chr1	128398	128601	-	204	0	0	0	0	0	0	0	0	0	0	0	0
macs2_2.9e9_minus_peak_9	chr1	134077	134285	-	209	0	0	0	0	0	0	0	0	1	0	0	0
macs2_2.9e9_minus_peak_10	chr1	134642	134990	-	349	1	1	3	1	0	0	0	1	3	0	0	1
macs2_2.9e9_minus_peak_11	chr1	150179	150613	-	435	4	3	6	5	0	1	2	3	4	0	2	3
macs2_2.9e9_minus_peak_12	chr1	160372	160639	-	268	0	1	0	0	0	0	0	0	0	0	0	0
macs2_2.9e9_minus_peak_13	chr1	168740	168939	-	200	0	0	0	0	0	0	0	0	0	0	0	0
macs2_2.9e9_minus_peak_14	chr1	172019	172227	-	209	0	0	0	0	0	0	0	0	0	0	0	0
macs2_2.9e9_minus_peak_15	chr1	228109	228380	-	272	0	0	0	0	0	0	0	0	0	0	0	0
macs2_2.9e9_minus_peak_16	chr1	236012	236213	-	202	2	0	0	3	1	0	0	2	0	2	0	0
macs2_2.9e9_minus_peak_17	chr1	245273	245493	-	221	1	2	0	0	3	1	0	0	0	0	1	0
macs2_2.9e9_minus_peak_18	chr1	267465	267673	-	209	0	0	0	0	0	1	0	0	0	0	0	0
macs2_2.9e9_minus_peak_19	chr1	564380	565273	-	894	7	1	2	0	1	2	2	0	2	2	3	2
macs2_2.9e9_minus_peak_20	chr1	565970	566707	-	738	78	82	73	57	104	96	46	73	83	32	88	52
macs2_2.9e9_minus_peak_21	chr1	567169	567426	-	258	0	0	0	0	0	0	0	0	0	0	0	1
macs2_2.9e9_minus_peak_22	chr1	567779	567978	-	200	0	0	0	0	0	0	0	1	0	0	0	0
macs2_2.9e9_minus_peak_23	chr1	569216	569572	-	357	2	0	3	0	0	0	0	0	0	0	1	0
macs2_2.9e9_minus_peak_24	chr1	569668	569970	-	303	413	487	137	276	89	159	53	103	158	179	178	187
macs2_2.9e9_minus_peak_25	chr1	603462	603661	-	200	0	0	1	0	1	0	0	0	4	0	0	2
macs2_2.9e9_minus_peak_26	chr1	630057	630301	-	245	0	0	0	0	0	0	0	0	0	0	0	0
macs2_2.9e9_minus_peak_27	chr1	661051	661527	-	477	0	0	0	0	0	0	0	0	0	0	0	0
macs2_2.9e9_minus_peak_28	chr1	671552	671751	-	200	0	0	0	0	0	0	0	0	0	0	0	0
macs2_2.9e9_minus_peak_29	chr1	679440	679679	-	240	0	0	0	1	0	0	0	0	0	0	0	0
macs2_2.9e9_minus_peak_30	chr1	680100	680327	-	228	3	0	2	0	0	0	0	0	0	0	0	0
macs2_2.9e9_minus_peak_31	chr1	686887	687098	-	212	0	0	0	0	0	0	0	2	0	0	0	0
macs2_2.9e9_minus_peak_32	chr1	690563	690902	-	340	0	0	0	0	0	0	0	0	0	0	0	1
macs2_2.9e9_minus_peak_33	chr1	691936	692145	-	210	0	0	0	0	0	0	0	0	0	0	0	0
macs2_2.9e9_minus_peak_34	chr1	705565	705893	-	329	5	0	4	2	4	1	1	3	9	6	6	0
macs2_2.9e9_minus_peak_35	chr1	713660	713990	-	331	8	2	5	1	3	0	0	0	2	2	2	2
macs2_2.9e9_minus_peak_36	chr1	715551	715754	-	204	0	0	0	2	2	1	0	0	3	2	2	2
macs2_2.9e9_minus_peak_37	chr1	718888	719087	-	200	1	0	0	1	1	2	0	0	2	5	0	2
macs2_2.9e9_minus_peak_38	chr1	728790	729072	-	283	1	2	0	2	0	0	0	0	3	1	3	1
macs2_2.9e9_minus_peak_39	chr1	735843	736045	-	203	1	1	0	1	0	0	0	0	3	0	5	0
macs2_2.9e9_minus_peak_40	chr1	736251	736450	-	200	1	0	1	0	2	1	0	0	1	2	0	2
macs2_2.9e9_minus_peak_41	chr1	743757	743994	-	238	0	0	0	1	0	0	0	0	2	0	2	0
macs2_2.9e9_minus_peak_42	chr1	745322	745603	-	282	15	11	6	4	6	7	5	5	16	7	29	16
macs2_2.9e9_minus_peak_43	chr1	751869	752075	-	207	0	0	0	0	0	0	0	0	0	0	0	0
macs2_2.9e9_minus_peak_44	chr1	761371	762145	-	775	18	19	24	29	10	11	16	13	21	6	8	10
macs2_2.9e9_minus_peak_45	chr1	785965	786169	-	205	0	0	0	0	0	0	0	0	0	0	0	0
macs2_2.9e9_minus_peak_46	chr1	830103	830381	-	279	5	0	1	2	0	2	1	0	3	0	0	3
macs2_2.9e9_minus_peak_47	chr1	838310	838586	-	277	2	0	0	1	0	0	0	0	1	7	3	1
macs2_2.9e9_minus_peak_48	chr1	852114	852525	-	412	71	42	82	64	35	52	20	46	80	81	89	92
macs2_2.9e9_minus_peak_49	chr1	852937	853262	-	326	3	3	3	5	2	1	0	6	6	10	4	7
macs2_2.9e9_minus_peak_50	chr1	853595	853859	-	265	6	5	12	9	3	7	2	7	31	15	27	13
macs2_2.9e9_minus_peak_51	chr1	867444	867650	-	207	1	0	1	1	0	1	0	1	1	7	5	2
macs2_2.9e9_minus_peak_52	chr1	879454	880062	-	609	553	356	394	367	160	311	247	331	504	450	349	390
macs2_2.9e9_minus_peak_53	chr1	881431	881847	-	417	18	13	21	15	16	4	6	8	16	14	14	19
macs2_2.9e9_minus_peak_54	chr1	893299	893919	-	621	50	58	47	96	40	35	59	57	69	41	67	46
macs2_2.9e9_minus_peak_55	chr1	900554	900934	-	381	1	3	5	5	2	2	2	9	10	17	10	5
macs2_2.9e9_minus_peak_56	chr1	922556	922773	-	218	2	2	1	2	1	5	0	0	0	3	1	0
macs2_2.9e9_minus_peak_57	chr1	930839	931045	-	207	2	2	4	2	0	1	1	1	4	4	2	3
macs2_2.9e9_minus_peak_58	chr1	931274	931529	-	256	108	86	72	64	41	40	34	39	77	82	87	86
macs2_2.9e9_minus_peak_59	chr1	934203	934757	-	555	1021	660	1255	871	617	865	737	905	1553	872	1131	837
macs2_2.9e9_minus_peak_60	chr1	996269	996741	-	473	4	6	2	4	3	2	2	0	4	5	0	7
macs2_2.9e9_minus_peak_61	chr1	996829	997034	-	206	4	3	1	2	1	0	0	1	4	1	2	0
macs2_2.9e9_minus_peak_62	chr1	1000911	1001310	-	400	78	57	39	23	17	21	10	20	26	26	28	21
macs2_2.9e9_minus_peak_63	chr1	1001749	1002020	-	272	7	3	0	2	3	7	2	0	4	4	3	0
macs2_2.9e9_minus_peak_64	chr1	1017062	1017834	-	773	120	55	71	68	37	58	52	49	66	59	83	63
macs2_2.9e9_minus_peak_65	chr1	1032844	1033486	-	643	33	30	19	28	24	30	15	25	59	30	45	39
macs2_2.9e9_minus_peak_66	chr1	1033898	1034145	-	248	10	13	16	15	9	12	14	8	9	9	13	15
macs2_2.9e9_minus_peak_67	chr1	1036047	1036247	-	201	7	7	2	6	5	9	9	1	10	5	2	10
macs2_2.9e9_minus_peak_68	chr1	1037658	1037885	-	228	13	19	10	13	12	10	4	7	16	16	19	12
macs2_2.9e9_minus_peak_69	chr1	1038440	1038723	-	284	3	8	1	2	7	3	1	3	6	11	8	3
macs2_2.9e9_minus_peak_70	chr1	1044734	1045270	-	537	12	11	8	10	3	7	10	4	12	8	7	7
macs2_2.9e9_minus_peak_71	chr1	1048552	1048966	-	415	8	4	4	2	6	2	1	3	7	5	8	11
macs2_2.9e9_minus_peak_72	chr1	1049598	1049801	-	204	2	3	1	3	5	1	4	3	11	1	6	3
macs2_2.9e9_minus_peak_73	chr1	1083362	1083581	-	220	0	0	0	0	0	1	0	0	2	5	7	2
macs2_2.9e9_minus_peak_74	chr1	1152164	1152704	-	541	1750	1358	1273	1172	637	848	740	828	1186	1095	1040	980
macs2_2.9e9_minus_peak_75	chr1	1153793	1154273	-	481	53	44	37	33	20	27	18	24	50	29	42	36
macs2_2.9e9_minus_peak_76	chr1	1158441	1158719	-	279	30	28	20	23	8	14	7	15	4	25	13	20
macs2_2.9e9_minus_peak_77	chr1	1163751	1163984	-	234	8	6	6	3	0	0	1	2	0	4	1	5
macs2_2.9e9_minus_peak_78	chr1	1164543	1165042	-	500	2	1	3	1	4	1	4	3	4	2	4	3
macs2_2.9e9_minus_peak_79	chr1	1177804	1178402	-	599	15	6	13	5	2	3	3	3	7	1	2	4
macs2_2.9e9_minus_peak_80	chr1	1189181	1189686	-	506	200	159	152	119	84	104	67	90	135	132	166	112
macs2_2.9e9_minus_peak_81	chr1	1190154	1190772	-	619	1154	824	882	841	532	766	472	655	1172	846	1145	831
macs2_2.9e9_minus_peak_82	chr1	1196907	1197298	-	392	11	7	13	7	7	8	8	7	8	7	12	4
macs2_2.9e9_minus_peak_83	chr1	1204150	1204389	-	240	3	3	5	4	3	4	2	3	2	3	2	4
macs2_2.9e9_minus_peak_84	chr1	1204717	1204999	-	283	9	6	2	5	6	9	4	3	2	4	4	5
macs2_2.9e9_minus_peak_85	chr1	1205459	1205658	-	200	2	3	1	1	0	0	1	4	1	3	2	1
macs2_2.9e9_minus_peak_86	chr1	1205817	1206065	-	249	2	5	1	3	0	2	2	1	6	0	5	4
macs2_2.9e9_minus_peak_87	chr1	1214700	1214904	-	205	3	2	0	2	0	0	1	0	7	1	2	4
macs2_2.9e9_minus_peak_88	chr1	1227661	1228686	-	1026	135	86	125	98	49	81	64	83	99	111	64	63
macs2_2.9e9_minus_peak_89	chr1	1236517	1237057	-	541	176	166	162	177	134	147	152	149	194	122	106	120
macs2_2.9e9_minus_peak_90	chr1	1246843	1247579	-	737	108	85	91	81	44	63	63	84	121	117	106	89
macs2_2.9e9_minus_peak_91	chr1	1253165	1253364	-	200	1	0	3	2	5	3	1	3	2	3	5	5
macs2_2.9e9_minus_peak_92	chr1	1253929	1254296	-	368	442	449	299	518	226	342	226	279	360	296	278	339
macs2_2.9e9_minus_peak_93	chr1	1258671	1259246	-	576	39	38	60	64	23	26	43	38	51	29	50	32
macs2_2.9e9_minus_peak_94	chr1	1270522	1271235	-	714	929	774	685	747	391	509	445	550	784	689	650	608
macs2_2.9e9_minus_peak_95	chr1	1287937	1288423	-	487	621	461	268	300	140	180	163	237	313	314	346	324
macs2_2.9e9_minus_peak_96	chr1	1308965	1309629	-	665	619	471	408	383	229	371	283	317	395	354	286	302
macs2_2.9e9_minus_peak_97	chr1	1320998	1321363	-	366	177	161	73	136	53	65	62	79	73	80	75	91
macs2_2.9e9_minus_peak_98	chr1	1321756	1322899	-	1144	1517	1318	881	992	518	645	597	748	974	792	826	810
macs2_2.9e9_minus_peak_99	chr1	1327576	1328031	-	456	138	107	116	163	79	106	112	128	161	131	134	138
macs2_2.9e9_minus_peak_100	chr1	1330776	1330995	-	220	32	21	26	25	11	20	22	20	14	7	12	19
macs2_2.9e9_minus_peak_101	chr1	1331864	1332233	-	370	15	33	21	29	13	10	14	13	21	10	6	17
macs2_2.9e9_minus_peak_102	chr1	1337168	1337627	-	460	1161	956	632	720	381	562	464	507	707	785	710	693
macs2_2.9e9_minus_peak_103	chr1	1339450	1339650	-	201	19	16	11	21	14	16	8	11	20	13	30	22
macs2_2.9e9_minus_peak_104	chr1	1339799	1340205	-	407	25	22	24	32	19	18	20	11	34	8	29	11
macs2_2.9e9_minus_peak_105	chr1	1340775	1341213	-	439	47	38	42	39	11	27	21	23	29	36	18	37
macs2_2.9e9_minus_peak_106	chr1	1342173	1342638	-	466	95	52	51	43	33	45	28	31	52	56	57	56
macs2_2.9e9_minus_peak_107	chr1	1365413	1365907	-	495	7	5	12	5	2	4	4	5	9	12	21	11
macs2_2.9e9_minus_peak_108	chr1	1378898	1379124	-	227	50	41	54	38	10	44	35	27	56	43	18	27
macs2_2.9e9_minus_peak_109	chr1	1406497	1406936	-	440	50	37	26	41	15	16	25	25	28	37	28	31
macs2_2.9e9_minus_peak_110	chr1	1446097	1446881	-	785	62	35	55	55	22	43	28	27	82	66	56	51
macs2_2.9e9_minus_peak_111	chr1	1474307	1474537	-	231	8	15	8	10	5	5	10	2	10	9	8	2
macs2_2.9e9_minus_peak_112	chr1	1476901	1477498	-	598	402	401	268	311	134	228	185	182	312	275	264	217
macs2_2.9e9_minus_peak_113	chr1	1488298	1488498	-	201	3	1	0	1	1	0	0	0	4	5	2	3
macs2_2.9e9_minus_peak_114	chr1	1494750	1494966	-	217	7	7	7	8	3	5	6	11	17	11	8	6
macs2_2.9e9_minus_peak_115	chr1	1496170	1496454	-	285	8	5	12	10	6	6	1	4	34	47	43	22
macs2_2.9e9_minus_peak_116	chr1	1497595	1498116	-	522	239	174	280	277	175	200	162	218	423	346	407	329
macs2_2.9e9_minus_peak_117	chr1	1499532	1499799	-	268	9	8	6	9	9	8	3	5	14	8	23	14
macs2_2.9e9_minus_peak_118	chr1	1499887	1500267	-	381	26	31	25	29	19	21	20	24	14	21	11	24
macs2_2.9e9_minus_peak_119	chr1	1509667	1510010	-	344	12	9	7	7	6	10	8	8	9	3	1	7
macs2_2.9e9_minus_peak_120	chr1	1522172	1522728	-	557	7	2	2	0	3	2	2	4	3	1	1	2
macs2_2.9e9_minus_peak_121	chr1	1533228	1533858	-	631	119	69	153	133	60	117	97	114	194	187	123	120
macs2_2.9e9_minus_peak_122	chr1	1549004	1549411	-	408	37	36	60	46	17	17	25	15	52	60	24	34
macs2_2.9e9_minus_peak_123	chr1	1570490	1571374	-	885	0	1	0	0	0	0	0	0	0	1	2	0
macs2_2.9e9_minus_peak_124	chr1	1576870	1577075	-	206	2	2	0	3	4	1	0	0	0	3	3	3
macs2_2.9e9_minus_peak_125	chr1	1577384	1577851	-	468	4	1	7	5	0	1	0	3	0	1	2	1
macs2_2.9e9_minus_peak_126	chr1	1580304	1580784	-	481	4	3	0	1	0	0	1	0	2	0	1	0
macs2_2.9e9_minus_peak_127	chr1	1581583	1581839	-	257	25	4	7	10	7	4	4	2	3	7	4	11
macs2_2.9e9_minus_peak_128	chr1	1582385	1582696	-	312	5	2	4	5	1	1	0	1	4	1	5	2
macs2_2.9e9_minus_peak_129	chr1	1586706	1587046	-	341	49	39	25	25	15	16	18	13	28	27	23	26
macs2_2.9e9_minus_peak_130	chr1	1588641	1588934	-	294	35	16	18	8	9	14	14	11	18	23	10	16
macs2_2.9e9_minus_peak_131	chr1	1590227	1590440	-	214	27	16	21	16	7	20	18	12	14	17	16	14
macs2_2.9e9_minus_peak_132	chr1	1590910	1591138	-	229	0	0	0	0	0	0	0	0	0	0	0	0
macs2_2.9e9_minus_peak_133	chr1	1592807	1593339	-	533	157	166	90	169	64	85	58	60	125	133	162	146
macs2_2.9e9_minus_peak_134	chr1	1593998	1594378	-	381	7	9	7	19	3	9	4	7	11	13	10	9
macs2_2.9e9_minus_peak_135	chr1	1595598	1595940	-	343	18	23	33	33	12	21	15	17	23	17	18	15
macs2_2.9e9_minus_peak_136	chr1	1599960	1600207	-	248	17	11	15	14	9	8	11	11	8	16	14	8
macs2_2.9e9_minus_peak_137	chr1	1601657	1602396	-	740	35	23	44	52	30	29	31	38	31	16	33	22
macs2_2.9e9_minus_peak_138	chr1	1612548	1612747	-	200	1	0	0	0	2	0	1	0	3	2	1	0
macs2_2.9e9_minus_peak_139	chr1	1614398	1614597	-	200	1	2	4	3	0	2	0	0	2	1	4	0
macs2_2.9e9_minus_peak_140	chr1	1617674	1617959	-	286	10	6	6	12	6	8	7	7	10	12	6	10
macs2_2.9e9_minus_peak_141	chr1	1620572	1620833	-	262	7	4	16	14	4	8	5	4	11	9	4	5
macs2_2.9e9_minus_peak_142	chr1	1623451	1623846	-	396	0	0	1	2	0	2	1	1	1	2	1	0
macs2_2.9e9_minus_peak_143	chr1	1624240	1624472	-	233	3	2	2	4	0	1	1	2	2	1	3	2
macs2_2.9e9_minus_peak_144	chr1	1633687	1633911	-	225	0	0	0	1	0	0	1	0	0	0	0	0
macs2_2.9e9_minus_peak_145	chr1	1634030	1634583	-	554	2	0	0	1	0	3	0	0	0	1	0	0
macs2_2.9e9_minus_peak_146	chr1	1640093	1640328	-	236	2	2	0	3	4	1	0	0	0	3	3	3
macs2_2.9e9_minus_peak_147	chr1	1640441	1641074	-	634	0	0	0	0	0	0	0	0	0	0	0	0
macs2_2.9e9_minus_peak_148	chr1	1647600	1647960	-	361	40	33	38	51	28	22	13	20	30	47	28	21
macs2_2.9e9_minus_peak_149	chr1	1650601	1651046	-	446	121	121	57	94	50	65	44	51	60	67	83	68
macs2_2.9e9_minus_peak_150	chr1	1652861	1653272	-	412	42	64	30	44	21	36	20	23	24	36	36	37
macs2_2.9e9_minus_peak_151	chr1	1653963	1654177	-	215	2	3	3	4	1	1	0	1	0	2	2	2
macs2_2.9e9_minus_peak_152	chr1	1658699	1659258	-	560	535	671	416	674	287	311	219	303	404	461	493	570
macs2_2.9e9_minus_peak_153	chr1	1663604	1663865	-	262	34	47	37	45	21	27	27	28	34	34	43	40
macs2_2.9e9_minus_peak_154	chr1	1666336	1666747	-	412	89	92	83	103	53	74	62	69	84	71	89	73
macs2_2.9e9_minus_peak_155	chr1	1676747	1677094	-	348	0	0	0	0	0	0	0	0	0	0	0	0
macs2_2.9e9_minus_peak_156	chr1	1677479	1677720	-	242	2	1	1	7	1	4	3	4	8	3	4	2
macs2_2.9e9_minus_peak_157	chr1	1682560	1683182	-	623	8	3	0	3	0	5	3	2	0	1	0	5
macs2_2.9e9_minus_peak_158	chr1	1683830	1684324	-	495	236	176	206	162	113	129	141	162	143	110	116	125
macs2_2.9e9_minus_peak_159	chr1	1692360	1692582	-	223	6	1	2	1	0	0	0	0	2	0	1	0
macs2_2.9e9_minus_peak_160	chr1	1698018	1698311	-	294	13	15	9	27	7	11	13	9	13	6	13	12
macs2_2.9e9_minus_peak_161	chr1	1699051	1699255	-	205	5	7	3	5	2	2	8	4	3	2	5	5
macs2_2.9e9_minus_peak_162	chr1	1703158	1703752	-	595	37	23	32	35	7	22	26	28	22	19	25	23
macs2_2.9e9_minus_peak_163	chr1	1708335	1708546	-	212	4	2	2	2	3	3	1	0	5	1	7	0
macs2_2.9e9_minus_peak_164	chr1	1709540	1709768	-	229	10	5	9	2	2	5	4	3	9	1	10	1
macs2_2.9e9_minus_peak_165	chr1	1714650	1714861	-	212	17	14	8	7	4	10	6	4	6	7	3	5
macs2_2.9e9_minus_peak_166	chr1	1716610	1717606	-	997	832	662	916	924	548	630	530	555	910	651	864	638
macs2_2.9e9_minus_peak_167	chr1	1718073	1718453	-	381	322	281	303	326	154	232	213	210	296	213	160	203
macs2_2.9e9_minus_peak_168	chr1	1723562	1723767	-	206	2	0	6	5	1	1	3	1	1	0	2	4
macs2_2.9e9_minus_peak_169	chr1	1728782	1728987	-	206	8	1	2	0	2	2	4	0	2	4	1	1
macs2_2.9e9_minus_peak_170	chr1	1730667	1731096	-	430	12	5	13	8	5	5	3	4	5	3	8	4
macs2_2.9e9_minus_peak_171	chr1	1734779	1734992	-	214	4	2	2	3	0	7	7	2	4	1	4	3
macs2_2.9e9_minus_peak_172	chr1	1738278	1738546	-	269	17	15	19	17	10	13	11	7	18	13	13	8
macs2_2.9e9_minus_peak_173	chr1	1740548	1740770	-	223	3	2	6	5	8	3	5	3	5	3	4	2
macs2_2.9e9_minus_peak_174	chr1	1742443	1742642	-	200	5	2	1	0	2	4	6	2	5	2	5	6
macs2_2.9e9_minus_peak_175	chr1	1744463	1744801	-	339	41	37	25	36	26	28	27	32	30	14	23	30
macs2_2.9e9_minus_peak_176	chr1	1747966	1748196	-	231	8	7	18	10	4	4	5	10	8	0	8	4
macs2_2.9e9_minus_peak_177	chr1	1751001	1751284	-	284	10	5	11	8	4	6	9	7	14	3	4	5
macs2_2.9e9_minus_peak_178	chr1	1753643	1753898	-	256	26	25	15	22	12	10	7	12	20	17	12	21
macs2_2.9e9_minus_peak_179	chr1	1754769	1754969	-	201	5	10	14	15	2	7	4	4	4	4	6	7
macs2_2.9e9_minus_peak_180	chr1	1756346	1756845	-	500	39	35	38	46	22	22	24	34	35	25	38	31
macs2_2.9e9_minus_peak_181	chr1	1761089	1761296	-	208	5	3	3	1	3	6	3	8	9	4	11	2
macs2_2.9e9_minus_peak_182	chr1	1767730	1768032	-	303	6	7	11	3	3	6	5	6	5	11	14	4
macs2_2.9e9_minus_peak_183	chr1	1768184	1768698	-	515	17	19	32	19	17	23	18	18	40	27	37	23
macs2_2.9e9_minus_peak_184	chr1	1769580	1770006	-	427	6	5	10	7	0	2	2	1	12	9	8	15
macs2_2.9e9_minus_peak_185	chr1	1781865	1782318	-	454	8	6	3	5	1	3	9	5	7	6	9	8
macs2_2.9e9_minus_peak_186	chr1	1784520	1784864	-	345	4	6	2	9	9	5	6	2	26	16	32	23
macs2_2.9e9_minus_peak_187	chr1	1789480	1790036	-	557	36	48	36	47	19	21	25	30	64	38	45	52
macs2_2.9e9_minus_peak_188	chr1	1790344	1790613	-	270	14	15	19	13	13	10	9	12	16	20	13	23
macs2_2.9e9_minus_peak_189	chr1	1793772	1794062	-	291	14	9	22	17	15	7	12	15	29	24	25	26
macs2_2.9e9_minus_peak_190	chr1	1798969	1799294	-	326	16	1	9	14	10	9	9	4	7	10	5	10
macs2_2.9e9_minus_peak_191	chr1	1802732	1802944	-	213	21	15	13	14	8	14	16	10	23	16	23	12
macs2_2.9e9_minus_peak_192	chr1	1803302	1803767	-	466	71	62	51	88	29	53	56	60	113	88	86	93
macs2_2.9e9_minus_peak_193	chr1	1804383	1804795	-	413	35	38	28	25	9	16	15	24	41	33	41	28
macs2_2.9e9_minus_peak_194	chr1	1812732	1813020	-	289	21	23	21	30	11	11	12	17	28	28	26	16
macs2_2.9e9_minus_peak_195	chr1	1815288	1815671	-	384	19	23	11	35	10	19	18	16	33	15	28	36
macs2_2.9e9_minus_peak_196	chr1	1816903	1817109	-	207	11	12	11	16	7	3	1	7	10	5	18	8
macs2_2.9e9_minus_peak_197	chr1	1817640	1818113	-	474	9	12	10	7	5	1	4	2	6	7	11	8
macs2_2.9e9_minus_peak_198	chr1	1822073	1822302	-	230	20	20	23	25	22	17	13	21	30	18	30	21
macs2_2.9e9_minus_peak_199	chr1	1828514	1828727	-	214	3	3	0	2	3	6	1	0	2	1	1	2
macs2_2.9e9_minus_peak_200	chr1	1834421	1834632	-	212	5	7	2	2	0	0	0	0	3	4	7	5
macs2_2.9e9_minus_peak_201	chr1	1834854	1835058	-	205	2	2	1	0	1	0	1	2	4	5	9	6
macs2_2.9e9_minus_peak_202	chr1	1836756	1837250	-	495	8	12	4	9	2	4	2	1	16	12	11	15
macs2_2.9e9_minus_peak_203	chr1	1837349	1837550	-	202	4	2	0	0	0	0	1	0	3	3	5	7
macs2_2.9e9_minus_peak_204	chr1	1848890	1849483	-	594	49	30	37	26	23	37	31	37	76	48	53	45
macs2_2.9e9_minus_peak_205	chr1	1867055	1867314	-	260	7	3	0	5	1	1	1	2	2	2	3	4
macs2_2.9e9_minus_peak_206	chr1	1873095	1873341	-	247	0	0	2	2	0	3	0	2	8	0	3	1
macs2_2.9e9_minus_peak_207	chr1	1880849	1881072	-	224	4	2	5	4	1	5	2	3	2	0	9	5
macs2_2.9e9_minus_peak_208	chr1	1882422	1882665	-	244	6	12	9	9	6	4	1	8	8	8	10	11
macs2_2.9e9_minus_peak_209	chr1	1980505	1980741	-	237	1	3	2	3	0	1	0	1	5	6	2	1
macs2_2.9e9_minus_peak_210	chr1	1989215	1989414	-	200	0	1	0	0	0	0	0	1	0	0	2	1
macs2_2.9e9_minus_peak_211	chr1	2115783	2116183	-	401	59	43	17	26	14	20	9	13	25	31	26	29
macs2_2.9e9_minus_peak_212	chr1	2120871	2121203	-	333	83	58	86	41	27	44	41	41	73	58	28	51
macs2_2.9e9_minus_peak_213	chr1	2123205	2123671	-	467	45	29	58	55	35	39	35	44	85	71	63	51
macs2_2.9e9_minus_peak_214	chr1	2123769	2124001	-	233	7	3	10	9	3	6	1	6	7	9	12	7
macs2_2.9e9_minus_peak_215	chr1	2124476	2124690	-	215	15	13	8	4	1	3	5	6	5	2	6	8
macs2_2.9e9_minus_peak_216	chr1	2124915	2125189	-	275	10	8	13	11	7	8	7	3	9	14	1	6
macs2_2.9e9_minus_peak_217	chr1	2142585	2142983	-	399	0	0	0	1	1	2	2	0	1	2	4	1
macs2_2.9e9_minus_peak_218	chr1	2143245	2143470	-	226	5	0	1	2	1	1	0	2	1	1	0	4
macs2_2.9e9_minus_peak_219	chr1	2238426	2238627	-	202	3	1	1	4	0	0	0	0	0	0	3	0
macs2_2.9e9_minus_peak_220	chr1	2250556	2250776	-	221	5	2	2	1	1	1	0	0	0	0	2	2
macs2_2.9e9_minus_peak_221	chr1	2252578	2252793	-	216	8	2	4	0	1	2	0	0	1	1	1	2
macs2_2.9e9_minus_peak_222	chr1	2263380	2263677	-	298	1	5	1	2	1	0	0	0	0	2	3	1
macs2_2.9e9_minus_peak_223	chr1	2265221	2265484	-	264	1	3	0	0	0	2	0	0	0	1	0	7
macs2_2.9e9_minus_peak_224	chr1	2279136	2279409	-	274	10	8	7	5	2	6	5	3	17	21	16	26
macs2_2.9e9_minus_peak_225	chr1	2280876	2281148	-	273	5	3	5	1	4	1	0	4	5	3	2	1
macs2_2.9e9_minus_peak_226	chr1	2282178	2282377	-	200	4	1	1	1	0	4	1	2	1	2	7	2
macs2_2.9e9_minus_peak_227	chr1	2286231	2286611	-	381	4	3	6	1	2	3	3	0	7	6	13	5
macs2_2.9e9_minus_peak_228	chr1	2294417	2294814	-	398	24	17	0	7	6	8	3	8	12	30	18	19
macs2_2.9e9_minus_peak_229	chr1	2297477	2297677	-	201	6	0	1	2	1	4	1	4	4	8	5	5
macs2_2.9e9_minus_peak_230	chr1	2301972	2302284	-	313	46	35	26	30	16	27	17	26	49	44	46	37
macs2_2.9e9_minus_peak_231	chr1	2302476	2302693	-	218	8	15	9	9	7	12	1	8	9	17	19	6
macs2_2.9e9_minus_peak_232	chr1	2303375	2303623	-	249	4	3	2	6	2	0	2	1	5	7	7	3
macs2_2.9e9_minus_peak_233	chr1	2306196	2306503	-	308	8	5	4	7	1	7	4	3	5	8	2	9
macs2_2.9e9_minus_peak_234	chr1	2310333	2310590	-	258	13	9	5	8	3	4	4	1	11	8	8	4
macs2_2.9e9_minus_peak_235	chr1	2311880	2312241	-	362	12	4	6	5	1	4	7	2	5	12	4	12
macs2_2.9e9_minus_peak_236	chr1	2315444	2315749	-	306	19	12	7	10	7	8	2	7	12	17	18	9
macs2_2.9e9_minus_peak_237	chr1	2316129	2316344	-	216	6	8	2	3	0	6	2	4	6	1	7	5
macs2_2.9e9_minus_peak_238	chr1	2319355	2319699	-	345	20	11	21	14	6	7	8	14	13	13	10	11
macs2_2.9e9_minus_peak_239	chr1	2322096	2322346	-	251	3	2	4	8	3	4	1	3	2	1	1	3
macs2_2.9e9_minus_peak_240	chr1	2335264	2335599	-	336	31	23	19	17	8	18	10	16	16	12	11	33
macs2_2.9e9_minus_peak_241	chr1	2336109	2336793	-	685	134	124	118	119	61	73	55	81	121	94	109	87
macs2_2.9e9_minus_peak_242	chr1	2342571	2343198	-	628	28	35	35	50	19	30	14	14	26	28	47	26
macs2_2.9e9_minus_peak_243	chr1	2439837	2440352	-	516	68	47	66	55	6	38	41	77	64	39	9	45
macs2_2.9e9_minus_peak_244	chr1	2460062	2460364	-	303	7	6	18	20	23	25	35	32	73	63	52	34
macs2_2.9e9_minus_peak_245	chr1	2517349	2517576	-	228	6	2	11	6	6	4	1	2	7	5	4	2
macs2_2.9e9_minus_peak_246	chr1	2521943	2522188	-	246	0	2	2	1	4	1	0	0	3	0	2	0
macs2_2.9e9_minus_peak_247	chr1	2569373	2569912	-	540	7	4	8	8	0	2	1	1	6	12	12	4
macs2_2.9e9_minus_peak_248	chr1	2980502	2980842	-	341	5	2	6	5	3	6	3	4	7	10	11	14
macs2_2.9e9_minus_peak_249	chr1	2985083	2985338	-	256	1	2	6	1	0	2	1	0	1	4	2	0
macs2_2.9e9_minus_peak_250	chr1	3365789	3365988	-	200	1	2	1	2	1	0	0	1	3	0	6	0
macs2_2.9e9_minus_peak_251	chr1	3404449	3404734	-	286	0	7	4	3	0	2	0	0	3	0	1	0
macs2_2.9e9_minus_peak_252	chr1	3406353	3406730	-	378	9	9	3	10	4	2	8	3	8	5	4	1
macs2_2.9e9_minus_peak_253	chr1	3429627	3430271	-	645	6	6	5	9	2	2	1	3	4	3	2	2
macs2_2.9e9_minus_peak_254	chr1	3476597	3476975	-	379	4	6	6	9	2	5	2	3	11	10	9	7
macs2_2.9e9_minus_peak_255	chr1	3478717	3479019	-	303	3	1	2	1	1	3	3	1	1	4	1	2
macs2_2.9e9_minus_peak_256	chr1	3506234	3506481	-	248	0	0	4	0	1	1	2	0	4	3	7	3
macs2_2.9e9_minus_peak_257	chr1	3509260	3509490	-	231	0	0	1	3	0	1	1	5	18	8	20	14
macs2_2.9e9_minus_peak_258	chr1	3518119	3518482	-	364	0	1	2	2	1	3	2	3	18	6	10	15
macs2_2.9e9_minus_peak_259	chr1	3539309	3539652	-	344	10	12	16	11	4	2	4	2	7	4	4	4
macs2_2.9e9_minus_peak_260	chr1	3547216	3547672	-	457	993	637	646	682	325	526	433	502	773	714	656	703
macs2_2.9e9_minus_peak_261	chr1	3547860	3548146	-	287	25	12	7	3	1	9	8	6	30	10	0	9
macs2_2.9e9_minus_peak_262	chr1	3548378	3548813	-	436	41	21	26	32	13	18	19	14	21	18	18	8
macs2_2.9e9_minus_peak_263	chr1	3563498	3563967	-	470	10	15	22	15	7	6	13	6	10	15	10	8
macs2_2.9e9_minus_peak_264	chr1	3650385	3650613	-	229	5	8	6	4	6	8	4	1	16	12	19	10
macs2_2.9e9_minus_peak_265	chr1	3652061	3652833	-	773	47	38	54	47	18	18	33	34	45	51	43	34
macs2_2.9e9_minus_peak_266	chr1	3653604	3654145	-	542	158	159	104	103	61	65	66	56	101	56	74	71
macs2_2.9e9_minus_peak_267	chr1	3660951	3661178	-	228	1	1	3	4	0	2	1	0	1	2	1	0
macs2_2.9e9_minus_peak_268	chr1	3680722	3681122	-	401	0	0	1	3	4	1	0	1	1	4	3	4
macs2_2.9e9_minus_peak_269	chr1	3682015	3682261	-	247	1	3	2	1	3	1	1	2	2	1	3	0
macs2_2.9e9_minus_peak_270	chr1	3682374	3682644	-	271	5	6	3	5	3	1	1	5	4	12	10	3
macs2_2.9e9_minus_peak_271	chr1	3684629	3684828	-	200	1	1	3	2	1	2	0	1	3	0	2	2
macs2_2.9e9_minus_peak_272	chr1	3696651	3697229	-	579	1115	1098	667	827	477	656	505	611	811	661	901	809
macs2_2.9e9_minus_peak_273	chr1	3707904	3708104	-	201	2	2	0	2	2	0	0	1	0	0	1	1
macs2_2.9e9_minus_peak_274	chr1	3709594	3709875	-	282	0	1	2	3	0	0	0	1	0	1	1	1
macs2_2.9e9_minus_peak_275	chr1	3713169	3713372	-	204	12	6	1	0	0	4	0	2	0	0	0	0
macs2_2.9e9_minus_peak_276	chr1	3728520	3729101	-	582	24	23	10	11	7	12	3	11	18	28	14	29
macs2_2.9e9_minus_peak_277	chr1	3731220	3731683	-	464	71	50	30	22	19	28	21	26	43	39	33	18
macs2_2.9e9_minus_peak_278	chr1	3735207	3735444	-	238	44	27	34	33	3	8	7	6	9	16	4	9
macs2_2.9e9_minus_peak_279	chr1	3739277	3739599	-	323	11	13	13	12	4	4	6	1	3	2	2	0
macs2_2.9e9_minus_peak_280	chr1	3745174	3745415	-	242	20	10	3	11	7	7	9	2	7	7	10	7
macs2_2.9e9_minus_peak_281	chr1	3745727	3746536	-	810	96	124	38	58	22	31	40	45	59	55	76	52
macs2_2.9e9_minus_peak_282	chr1	3751448	3751694	-	247	42	29	22	28	20	8	17	20	26	17	34	29
macs2_2.9e9_minus_peak_283	chr1	3752878	3753208	-	331	34	29	12	24	22	10	12	14	18	16	20	15
macs2_2.9e9_minus_peak_284	chr1	3758305	3758556	-	252	4	1	7	10	2	8	4	10	6	10	1	2
macs2_2.9e9_minus_peak_285	chr1	3759868	3760079	-	212	5	2	3	2	2	6	2	4	9	2	9	2
macs2_2.9e9_minus_peak_286	chr1	3762969	3763277	-	309	19	14	37	36	16	13	22	18	22	15	16	17
macs2_2.9e9_minus_peak_287	chr1	3765738	3766000	-	263	9	13	14	8	6	5	2	11	8	6	15	4
macs2_2.9e9_minus_peak_288	chr1	3771647	3772065	-	419	4	6	9	8	2	4	5	7	7	3	5	7
macs2_2.9e9_minus_peak_289	chr1	3772824	3773187	-	364	29	22	30	29	12	21	18	19	21	17	20	23
macs2_2.9e9_minus_peak_290	chr1	3805560	3806003	-	444	347	328	268	365	133	261	187	252	315	240	175	285
macs2_2.9e9_minus_peak_291	chr1	5913906	5914112	-	207	0	0	0	1	0	0	0	0	1	7	0	4
macs2_2.9e9_minus_peak_292	chr1	5917556	5917791	-	236	0	0	3	1	0	1	0	2	3	0	0	3
macs2_2.9e9_minus_peak_293	chr1	5922734	5923201	-	468	128	91	86	98	57	80	55	55	110	60	98	93
macs2_2.9e9_minus_peak_294	chr1	5932680	5932961	-	282	2	1	1	0	1	0	0	1	3	3	0	1
macs2_2.9e9_minus_peak_295	chr1	5939431	5939694	-	264	2	2	2	0	1	1	1	0	6	1	0	3
macs2_2.9e9_minus_peak_296	chr1	5946415	5946814	-	400	5	6	14	12	8	9	14	10	19	26	22	14
macs2_2.9e9_minus_peak_297	chr1	5962569	5962778	-	210	1	3	0	2	1	3	1	3	1	0	3	2
macs2_2.9e9_minus_peak_298	chr1	5979262	5979587	-	326	11	6	5	6	2	2	0	5	7	1	8	2
macs2_2.9e9_minus_peak_299	chr1	5979700	5979960	-	261	1	0	6	3	1	2	3	5	3	7	11	4
macs2_2.9e9_minus_peak_300	chr1	5980658	5981020	-	363	3	6	4	2	0	1	3	3	2	5	3	2
macs2_2.9e9_minus_peak_301	chr1	5986451	5986720	-	270	8	2	3	3	4	1	5	2	6	11	5	13
macs2_2.9e9_minus_peak_302	chr1	5990207	5990516	-	310	4	4	7	2	3	2	4	3	2	6	2	4
macs2_2.9e9_minus_peak_303	chr1	6011381	6011584	-	204	1	0	3	0	1	2	1	0	1	2	3	2
macs2_2.9e9_minus_peak_304	chr1	6013011	6013303	-	293	6	8	1	7	0	2	0	1	1	3	2	1
macs2_2.9e9_minus_peak_305	chr1	6013898	6014280	-	383	3	2	3	1	1	0	4	1	7	1	2	1
macs2_2.9e9_minus_peak_306	chr1	6023641	6023840	-	200	1	0	1	1	0	0	1	1	1	1	0	0
macs2_2.9e9_minus_peak_307	chr1	6024907	6025124	-	218	2	2	1	3	1	0	0	3	0	1	3	4
macs2_2.9e9_minus_peak_308	chr1	6032679	6033038	-	360	3	2	4	6	1	0	1	3	10	4	10	4
macs2_2.9e9_minus_peak_309	chr1	6042054	6042554	-	501	16	6	4	11	6	0	10	5	12	9	13	16
macs2_2.9e9_minus_peak_310	chr1	6048372	6048824	-	453	13	10	7	7	2	8	6	2	12	8	3	8
macs2_2.9e9_minus_peak_311	chr1	6049043	6049242	-	200	0	0	1	3	3	3	1	2	0	0	1	0
macs2_2.9e9_minus_peak_312	chr1	6074938	6075151	-	214	3	4	8	1	0	3	1	0	2	1	4	1
macs2_2.9e9_minus_peak_313	chr1	6161703	6162017	-	315	4	7	8	9	0	3	6	8	12	3	10	9
macs2_2.9e9_minus_peak_314	chr1	6175203	6175514	-	312	2	3	2	3	0	3	8	1	2	1	0	2
macs2_2.9e9_minus_peak_315	chr1	6177535	6177932	-	398	1	6	0	6	6	4	3	6	4	3	0	1
macs2_2.9e9_minus_peak_316	chr1	6192385	6193083	-	699	4	9	5	11	5	5	6	3	7	1	3	4
macs2_2.9e9_minus_peak_317	chr1	6206377	6206842	-	466	3	2	4	4	5	5	5	1	2	4	0	1
macs2_2.9e9_minus_peak_318	chr1	6214589	6214788	-	200	0	0	1	1	1	0	0	1	2	1	0	1
macs2_2.9e9_minus_peak_319	chr1	6219320	6219627	-	308	12	21	12	15	7	14	12	4	15	7	10	13
macs2_2.9e9_minus_peak_320	chr1	6228017	6228332	-	316	12	18	10	15	6	10	6	8	12	10	5	8
macs2_2.9e9_minus_peak_321	chr1	6239843	6240042	-	200	2	0	0	1	0	0	0	1	1	1	2	0
macs2_2.9e9_minus_peak_322	chr1	6244967	6245617	-	651	947	827	620	650	286	418	317	363	794	731	634	743
macs2_2.9e9_minus_peak_323	chr1	6246028	6246965	-	938	1293	1193	848	967	512	644	447	587	785	725	833	950
macs2_2.9e9_minus_peak_324	chr1	6252002	6252221	-	220	12	7	11	13	6	7	8	5	9	7	11	8
macs2_2.9e9_minus_peak_325	chr1	6252803	6253111	-	309	59	55	50	59	20	33	15	40	53	46	28	53
macs2_2.9e9_minus_peak_326	chr1	6257537	6257891	-	355	1121	868	883	888	510	575	447	501	771	840	595	718
macs2_2.9e9_minus_peak_327	chr1	6258645	6258919	-	275	5	6	9	2	6	6	10	6	12	3	6	8
macs2_2.9e9_minus_peak_328	chr1	6259440	6259691	-	252	277	204	262	205	169	196	128	123	274	202	209	166
macs2_2.9e9_minus_peak_329	chr1	6264789	6265301	-	513	18	27	31	16	9	7	10	13	26	26	23	38
macs2_2.9e9_minus_peak_330	chr1	6281130	6281716	-	587	352	297	160	211	88	137	93	144	250	284	172	238
macs2_2.9e9_minus_peak_331	chr1	6283426	6284009	-	584	335	342	244	280	159	216	185	239	252	218	227	234
macs2_2.9e9_minus_peak_332	chr1	6291632	6292125	-	494	63	59	45	43	31	42	27	41	28	46	27	45
macs2_2.9e9_minus_peak_333	chr1	6307282	6307852	-	571	129	104	72	103	49	59	47	44	112	130	148	116
macs2_2.9e9_minus_peak_334	chr1	6315609	6315863	-	255	12	8	13	15	6	8	2	8	19	11	21	4
macs2_2.9e9_minus_peak_335	chr1	6316329	6316664	-	336	4	10	8	7	3	10	2	8	2	6	7	8
macs2_2.9e9_minus_peak_336	chr1	6318075	6318313	-	239	4	10	6	10	2	3	5	7	15	8	12	16
macs2_2.9e9_minus_peak_337	chr1	6324195	6324732	-	538	180	148	173	141	64	113	91	111	68	84	36	72
macs2_2.9e9_minus_peak_338	chr1	6336741	6337014	-	274	0	0	2	0	1	5	0	3	35	14	31	18
macs2_2.9e9_minus_peak_339	chr1	6341000	6341289	-	290	6	6	13	4	0	11	5	4	3	2	0	4
macs2_2.9e9_minus_peak_340	chr1	6349073	6349282	-	210	3	2	1	2	0	3	3	1	7	5	9	11
macs2_2.9e9_minus_peak_341	chr1	6352616	6353098	-	483	11	13	13	13	16	14	13	10	36	22	32	22
macs2_2.9e9_minus_peak_342	chr1	6363412	6363611	-	200	0	0	0	3	0	2	0	0	3	0	0	1
macs2_2.9e9_minus_peak_343	chr1	6364324	6364538	-	215	0	3	1	1	2	0	2	1	0	0	2	3
macs2_2.9e9_minus_peak_344	chr1	6369434	6369705	-	272	5	7	4	1	0	3	2	1	5	1	1	2
macs2_2.9e9_minus_peak_345	chr1	6372475	6372674	-	200	0	2	0	1	0	2	1	0	1	0	3	0
macs2_2.9e9_minus_peak_346	chr1	6385433	6385817	-	385	25	14	11	11	6	7	11	16	15	18	19	17
macs2_2.9e9_minus_peak_347	chr1	6395443	6395644	-	202	0	1	1	3	1	0	1	0	2	1	4	0
macs2_2.9e9_minus_peak_348	chr1	6411000	6411215	-	216	0	0	1	0	0	3	1	0	2	4	2	2
macs2_2.9e9_minus_peak_349	chr1	6421696	6422006	-	311	9	0	2	1	0	1	1	0	8	13	6	1
macs2_2.9e9_minus_peak_350	chr1	6425050	6425268	-	219	3	1	1	0	0	0	1	1	3	4	1	2
macs2_2.9e9_minus_peak_351	chr1	6429329	6429738	-	410	1	4	2	5	0	2	2	3	5	11	10	6
macs2_2.9e9_minus_peak_352	chr1	6440886	6441139	-	254	0	2	1	0	1	2	0	0	12	5	9	12
macs2_2.9e9_minus_peak_353	chr1	6443497	6443759	-	263	4	4	6	5	2	4	6	6	15	19	19	6
macs2_2.9e9_minus_peak_354	chr1	6446288	6446493	-	206	6	2	1	2	0	3	1	0	5	4	7	2
macs2_2.9e9_minus_peak_355	chr1	6451899	6452303	-	405	7	2	2	7	1	5	6	2	8	9	12	7
macs2_2.9e9_minus_peak_356	chr1	6473001	6473286	-	286	2	6	2	2	3	2	3	3	15	9	7	13
macs2_2.9e9_minus_peak_357	chr1	6475173	6475544	-	372	9	5	0	3	3	10	1	3	15	16	11	11
macs2_2.9e9_minus_peak_358	chr1	6477895	6478274	-	380	4	12	3	0	1	8	1	4	17	17	14	12
macs2_2.9e9_minus_peak_359	chr1	6521068	6521464	-	397	46	22	17	25	12	11	5	9	9	16	20	15
macs2_2.9e9_minus_peak_360	chr1	6527041	6527532	-	492	79	92	91	90	42	58	68	80	94	85	110	85
macs2_2.9e9_minus_peak_361	chr1	6535826	6536055	-	230	14	10	2	8	1	1	0	0	3	4	4	7
macs2_2.9e9_minus_peak_362	chr1	6538150	6538396	-	247	3	6	6	6	3	1	4	6	13	7	15	14
macs2_2.9e9_minus_peak_363	chr1	6541862	6542062	-	201	1	0	1	1	1	1	1	3	3	3	2	2
macs2_2.9e9_minus_peak_364	chr1	6553970	6554323	-	354	0	1	0	0	0	1	1	3	2	1	6	6
macs2_2.9e9_minus_peak_365	chr1	6581278	6581872	-	595	797	621	540	596	432	652	395	501	1192	1239	1324	1164
macs2_2.9e9_minus_peak_366	chr1	6585110	6585414	-	305	90	53	67	72	44	73	61	47	163	104	185	108
macs2_2.9e9_minus_peak_367	chr1	6585514	6585970	-	457	32	29	23	35	17	34	17	22	36	23	30	18
macs2_2.9e9_minus_peak_368	chr1	6591961	6592189	-	229	3	2	5	6	2	4	2	1	5	2	2	7
macs2_2.9e9_minus_peak_369	chr1	6592421	6592622	-	202	1	0	3	4	3	1	1	2	2	2	1	6
macs2_2.9e9_minus_peak_370	chr1	6593847	6594059	-	213	5	3	3	6	1	4	4	5	3	0	4	5
macs2_2.9e9_minus_peak_371	chr1	6600986	6601259	-	274	13	11	16	15	8	14	12	13	22	9	14	17
macs2_2.9e9_minus_peak_372	chr1	6603162	6603366	-	205	10	13	5	14	10	15	7	5	5	10	6	14
macs2_2.9e9_minus_peak_373	chr1	6605118	6605379	-	262	56	44	45	54	33	45	30	30	73	52	63	85
macs2_2.9e9_minus_peak_374	chr1	6606751	6607124	-	374	39	42	25	58	20	35	19	22	42	33	51	39
macs2_2.9e9_minus_peak_375	chr1	6609456	6609695	-	240	10	3	7	10	20	14	7	15	33	26	38	40
macs2_2.9e9_minus_peak_376	chr1	6632234	6632436	-	203	1	3	1	1	2	3	0	0	0	2	1	1
macs2_2.9e9_minus_peak_377	chr1	6650648	6651165	-	518	284	217	239	181	114	210	177	211	256	230	286	277
macs2_2.9e9_minus_peak_378	chr1	6661058	6661330	-	273	0	0	1	2	1	1	2	4	2	0	1	0
macs2_2.9e9_minus_peak_379	chr1	6672039	6672373	-	335	14	2	7	3	5	6	1	5	9	10	9	12
macs2_2.9e9_minus_peak_380	chr1	6672967	6673199	-	233	3	3	6	6	2	2	0	3	1	3	7	6
macs2_2.9e9_minus_peak_381	chr1	6675996	6676202	-	207	0	1	2	1	3	9	0	0	1	0	1	3
macs2_2.9e9_minus_peak_382	chr1	6694094	6694628	-	535	206	156	91	122	75	95	65	83	139	94	140	109
macs2_2.9e9_minus_peak_383	chr1	6695050	6695425	-	376	24	19	17	20	3	12	10	11	28	11	18	5
macs2_2.9e9_minus_peak_384	chr1	6699324	6699546	-	223	9	4	4	4	0	7	2	1	2	1	6	2
macs2_2.9e9_minus_peak_385	chr1	6707024	6707339	-	316	77	106	47	86	37	41	28	32	51	49	70	63
macs2_2.9e9_minus_peak_386	chr1	6708435	6708638	-	204	11	10	5	6	6	2	4	7	7	0	6	7
macs2_2.9e9_minus_peak_387	chr1	6708964	6709335	-	372	14	8	8	11	5	10	3	8	15	14	12	5
macs2_2.9e9_minus_peak_388	chr1	6712403	6712610	-	208	7	4	7	1	2	2	5	4	5	1	2	3
macs2_2.9e9_minus_peak_389	chr1	6714724	6714969	-	246	5	5	2	6	3	8	2	4	6	8	6	3
macs2_2.9e9_minus_peak_390	chr1	6720950	6721198	-	249	3	3	3	3	2	2	1	1	3	1	9	3
macs2_2.9e9_minus_peak_391	chr1	6722081	6722367	-	287	7	7	5	6	3	1	1	3	2	7	3	5
macs2_2.9e9_minus_peak_392	chr1	6724222	6724435	-	214	2	1	3	3	0	2	0	7	2	3	1	4
macs2_2.9e9_minus_peak_393	chr1	6726334	6726610	-	277	10	6	1	7	4	5	1	6	7	7	7	5
macs2_2.9e9_minus_peak_394	chr1	6730309	6730644	-	336	6	8	1	1	3	3	1	3	7	6	6	5
macs2_2.9e9_minus_peak_395	chr1	6732111	6732329	-	219	8	4	1	10	5	5	1	2	3	8	8	5
macs2_2.9e9_minus_peak_396	chr1	6735361	6735587	-	227	3	5	1	7	3	5	1	1	11	4	2	4
macs2_2.9e9_minus_peak_397	chr1	6740453	6740730	-	278	8	5	4	9	0	4	4	3	6	4	8	11
macs2_2.9e9_minus_peak_398	chr1	6743824	6744264	-	441	7	9	1	7	3	1	7	1	8	7	6	6
macs2_2.9e9_minus_peak_399	chr1	6752567	6752828	-	262	3	7	1	4	1	4	5	3	4	5	7	3
macs2_2.9e9_minus_peak_400	chr1	6753351	6753552	-	202	2	5	3	4	1	2	4	0	3	1	3	0
macs2_2.9e9_minus_peak_401	chr1	6753693	6753998	-	306	5	4	8	2	2	5	2	2	3	3	5	2
macs2_2.9e9_minus_peak_402	chr1	6761663	6761872	-	210	2	4	3	0	1	1	0	0	0	1	1	0
macs2_2.9e9_minus_peak_403	chr1	6843660	6844369	-	710	43	39	52	45	19	23	26	25	25	39	36	27
macs2_2.9e9_minus_peak_404	chr1	6894176	6894394	-	219	2	4	8	5	0	9	3	6	6	7	0	6
macs2_2.9e9_minus_peak_405	chr1	7414126	7414327	-	202	0	0	0	0	0	0	0	0	0	0	0	0
macs2_2.9e9_minus_peak_406	chr1	7753102	7753444	-	343	3	6	3	1	2	0	0	0	0	1	1	2
macs2_2.9e9_minus_peak_407	chr1	7758273	7758494	-	222	2	3	2	1	2	3	4	4	2	7	4	4
macs2_2.9e9_minus_peak_408	chr1	7759074	7759319	-	246	11	15	6	7	4	3	2	7	9	9	2	4
macs2_2.9e9_minus_peak_409	chr1	7760411	7761020	-	610	16	9	12	16	10	5	12	7	14	9	12	10
macs2_2.9e9_minus_peak_410	chr1	7829874	7830073	-	200	1	0	3	1	0	0	2	0	2	0	0	2
macs2_2.9e9_minus_peak_411	chr1	7907528	7907878	-	351	2	10	4	0	0	1	4	2	5	17	0	6
macs2_2.9e9_minus_peak_412	chr1	7972948	7973148	-	201	1	4	0	0	2	0	1	0	1	0	2	2
macs2_2.9e9_minus_peak_413	chr1	7977592	7977807	-	216	6	4	1	3	2	1	1	0	0	0	2	2
macs2_2.9e9_minus_peak_414	chr1	7996532	7996859	-	328	5	4	0	1	0	0	1	3	1	1	0	1
macs2_2.9e9_minus_peak_415	chr1	8020479	8020733	-	255	9	3	1	3	4	2	1	0	1	2	2	1
macs2_2.9e9_minus_peak_416	chr1	8059488	8059692	-	205	1	1	1	2	2	0	2	0	1	0	0	2
macs2_2.9e9_minus_peak_417	chr1	8065662	8066096	-	435	1	3	1	3	0	3	6	2	2	2	1	2
macs2_2.9e9_minus_peak_418	chr1	8071655	8072479	-	825	222	171	209	172	72	114	118	140	119	97	110	133
macs2_2.9e9_minus_peak_419	chr1	8076623	8077175	-	553	28	24	27	35	20	15	20	17	19	19	9	24
macs2_2.9e9_minus_peak_420	chr1	8080512	8080800	-	289	9	8	13	12	6	6	6	6	11	9	6	2
macs2_2.9e9_minus_peak_421	chr1	8083242	8083642	-	401	9	5	9	8	2	6	4	10	6	3	3	4
macs2_2.9e9_minus_peak_422	chr1	8097580	8097810	-	231	15	21	23	17	9	15	7	13	21	12	10	16
macs2_2.9e9_minus_peak_423	chr1	8306895	8307182	-	288	0	1	2	0	3	0	0	0	1	0	0	1
macs2_2.9e9_minus_peak_424	chr1	8412341	8412857	-	517	353	360	171	240	89	123	132	152	166	164	188	191
macs2_2.9e9_minus_peak_425	chr1	8414453	8415107	-	655	99	60	47	52	39	51	33	35	58	42	41	58
macs2_2.9e9_minus_peak_426	chr1	8422567	8422766	-	200	1	1	0	0	0	1	0	0	0	0	4	0
macs2_2.9e9_minus_peak_427	chr1	8435895	8436234	-	340	8	4	1	5	2	1	1	0	3	1	4	3
macs2_2.9e9_minus_peak_428	chr1	8440262	8440563	-	302	3	3	5	1	3	3	2	0	6	3	2	6
macs2_2.9e9_minus_peak_429	chr1	8446016	8446547	-	532	15	7	5	10	2	4	5	0	8	6	9	13
macs2_2.9e9_minus_peak_430	chr1	8450604	8450809	-	206	0	7	3	7	0	0	1	1	5	2	0	2
macs2_2.9e9_minus_peak_431	chr1	8458571	8458884	-	314	7	9	3	6	3	2	5	4	5	5	3	4
macs2_2.9e9_minus_peak_432	chr1	8459767	8460025	-	259	7	15	1	8	0	4	5	6	13	9	6	6
macs2_2.9e9_minus_peak_433	chr1	8463383	8463652	-	270	24	28	11	20	16	15	7	15	14	14	19	15
macs2_2.9e9_minus_peak_434	chr1	8463787	8463988	-	202	5	10	0	8	4	6	3	5	1	6	3	2
macs2_2.9e9_minus_peak_435	chr1	8464354	8464578	-	225	8	2	6	12	4	2	5	3	8	3	2	5
macs2_2.9e9_minus_peak_436	chr1	8466184	8466524	-	341	34	14	11	25	7	6	7	15	16	9	13	7
macs2_2.9e9_minus_peak_437	chr1	8469926	8470358	-	433	93	103	86	100	60	71	51	60	88	61	103	59
macs2_2.9e9_minus_peak_438	chr1	8471298	8471586	-	289	23	24	14	26	8	18	8	7	7	8	14	18
macs2_2.9e9_minus_peak_439	chr1	8480228	8480515	-	288	2	0	4	4	2	1	0	1	0	0	2	3
macs2_2.9e9_minus_peak_440	chr1	8482165	8482364	-	200	1	0	0	1	1	0	1	0	1	2	1	2
macs2_2.9e9_minus_peak_441	chr1	8496767	8497098	-	332	6	4	4	3	1	0	0	2	4	2	7	0
macs2_2.9e9_minus_peak_442	chr1	8497432	8497639	-	208	5	3	4	10	2	1	6	5	5	3	5	3
macs2_2.9e9_minus_peak_443	chr1	8498000	8498205	-	206	1	0	2	1	1	3	2	0	5	5	0	2
macs2_2.9e9_minus_peak_444	chr1	8505448	8505878	-	431	32	25	25	25	9	11	14	11	27	21	33	19
macs2_2.9e9_minus_peak_445	chr1	8506946	8507207	-	262	0	3	3	2	4	9	4	3	1	2	2	2
macs2_2.9e9_minus_peak_446	chr1	8515207	8515591	-	385	15	11	10	18	6	4	6	8	13	12	19	11
macs2_2.9e9_minus_peak_447	chr1	8521254	8521536	-	283	11	9	3	5	3	6	1	0	8	2	2	5
macs2_2.9e9_minus_peak_448	chr1	8521808	8522021	-	214	6	1	2	7	4	1	1	1	4	4	8	1
macs2_2.9e9_minus_peak_449	chr1	8525262	8525613	-	352	0	2	6	3	1	7	4	2	7	14	5	10
macs2_2.9e9_minus_peak_450	chr1	8531451	8531847	-	397	22	27	25	24	22	17	8	13	26	16	29	22
macs2_2.9e9_minus_peak_451	chr1	8532800	8533381	-	582	57	35	34	32	14	28	20	19	39	29	48	33
macs2_2.9e9_minus_peak_452	chr1	8539266	8539651	-	386	3	2	5	2	2	2	6	5	3	4	2	5
macs2_2.9e9_minus_peak_453	chr1	8540074	8540313	-	240	7	5	7	7	2	1	3	5	6	7	3	7
macs2_2.9e9_minus_peak_454	chr1	8540391	8540629	-	239	3	2	4	1	0	1	1	0	2	5	5	0
macs2_2.9e9_minus_peak_455	chr1	8545766	8546027	-	262	5	5	6	10	0	2	2	1	3	3	4	6
macs2_2.9e9_minus_peak_456	chr1	8548172	8548390	-	219	3	5	3	6	1	4	1	2	2	2	1	2
macs2_2.9e9_minus_peak_457	chr1	8550455	8550746	-	292	3	5	7	3	2	4	2	0	8	12	12	17
macs2_2.9e9_minus_peak_458	chr1	8565483	8565764	-	282	1	1	1	0	2	1	3	2	5	2	1	2
macs2_2.9e9_minus_peak_459	chr1	8567688	8567937	-	250	6	5	6	6	2	2	3	1	5	7	2	7
macs2_2.9e9_minus_peak_460	chr1	8571713	8572003	-	291	34	30	30	44	9	17	27	23	32	28	39	9
macs2_2.9e9_minus_peak_461	chr1	8579709	8579984	-	276	4	2	5	2	1	0	3	4	3	1	1	4
macs2_2.9e9_minus_peak_462	chr1	8586242	8586719	-	478	48	26	31	52	18	18	20	32	33	34	36	21
macs2_2.9e9_minus_peak_463	chr1	8589241	8589621	-	381	2	6	8	8	3	4	2	5	6	1	3	1
macs2_2.9e9_minus_peak_464	chr1	8592541	8592740	-	200	1	4	1	2	4	0	1	1	1	0	0	1
macs2_2.9e9_minus_peak_465	chr1	8592877	8593229	-	353	3	5	5	2	4	1	3	0	1	1	2	2
macs2_2.9e9_minus_peak_466	chr1	8599353	8599618	-	266	10	7	6	4	1	5	1	5	10	1	0	2
macs2_2.9e9_minus_peak_467	chr1	8600057	8600350	-	294	7	4	5	7	2	3	4	2	10	2	0	4
macs2_2.9e9_minus_peak_468	chr1	8600978	8601210	-	233	10	7	11	10	7	4	2	7	5	6	8	3
macs2_2.9e9_minus_peak_469	chr1	8605944	8606261	-	318	29	28	37	36	12	13	15	14	21	27	17	25
macs2_2.9e9_minus_peak_470	chr1	8606432	8606635	-	204	9	10	5	3	4	5	6	11	5	3	7	8
macs2_2.9e9_minus_peak_471	chr1	8612329	8612955	-	627	101	75	67	71	30	29	27	49	66	58	6	51
macs2_2.9e9_minus_peak_472	chr1	8617841	8618077	-	237	1	2	3	0	1	4	0	2	8	1	1	4
macs2_2.9e9_minus_peak_473	chr1	8618701	8618981	-	281	2	6	6	8	1	2	2	0	5	3	7	3
macs2_2.9e9_minus_peak_474	chr1	8633076	8633361	-	286	31	44	42	37	19	18	17	18	36	46	47	32
macs2_2.9e9_minus_peak_475	chr1	8635346	8635796	-	451	24	16	26	15	9	19	22	15	28	18	18	25
macs2_2.9e9_minus_peak_476	chr1	8637185	8637520	-	336	3	11	9	6	5	0	1	2	7	6	5	6
macs2_2.9e9_minus_peak_477	chr1	8640800	8641027	-	228	4	10	6	6	3	4	3	4	7	1	6	5
macs2_2.9e9_minus_peak_478	chr1	8642324	8642839	-	516	50	34	40	53	18	17	18	22	49	26	41	29
macs2_2.9e9_minus_peak_479	chr1	8649489	8649944	-	456	8	5	7	3	3	5	3	2	5	3	11	2
macs2_2.9e9_minus_peak_480	chr1	8652215	8652500	-	286	18	10	11	21	8	3	6	4	10	12	22	11
macs2_2.9e9_minus_peak_481	chr1	8656477	8656985	-	509	26	25	31	28	11	17	12	14	27	17	33	26
macs2_2.9e9_minus_peak_482	chr1	8660976	8661220	-	245	4	12	15	1	4	5	3	6	6	10	14	13
macs2_2.9e9_minus_peak_483	chr1	8663050	8663418	-	369	8	10	6	16	4	13	7	5	12	8	13	13
macs2_2.9e9_minus_peak_484	chr1	8665824	8666023	-	200	8	3	19	8	5	7	5	7	17	5	17	12
macs2_2.9e9_minus_peak_485	chr1	8667524	8667887	-	364	33	24	18	28	14	19	11	19	42	24	39	24
macs2_2.9e9_minus_peak_486	chr1	8669714	8669981	-	268	37	23	28	44	13	15	15	19	35	30	20	35
macs2_2.9e9_minus_peak_487	chr1	8671411	8671614	-	204	10	5	14	10	4	1	0	4	13	5	4	7
macs2_2.9e9_minus_peak_488	chr1	8675827	8676090	-	264	23	19	18	26	6	15	14	10	19	26	11	28
macs2_2.9e9_minus_peak_489	chr1	8680402	8680815	-	414	10	14	14	15	4	4	11	9	14	12	11	12
macs2_2.9e9_minus_peak_490	chr1	8683485	8683902	-	418	18	11	11	9	3	6	3	4	9	5	14	11
macs2_2.9e9_minus_peak_491	chr1	8689756	8689980	-	225	8	5	8	6	0	1	1	4	5	4	1	4
macs2_2.9e9_minus_peak_492	chr1	8693839	8694040	-	202	6	2	3	2	3	1	0	2	10	3	8	4
macs2_2.9e9_minus_peak_493	chr1	8694346	8694586	-	241	1	3	2	4	3	2	2	2	2	2	5	2
macs2_2.9e9_minus_peak_494	chr1	8697689	8697957	-	269	8	7	9	9	5	4	3	3	4	6	8	4
macs2_2.9e9_minus_peak_495	chr1	8698767	8698985	-	219	1	6	2	1	0	2	3	1	5	4	3	5
macs2_2.9e9_minus_peak_496	chr1	8700226	8700499	-	274	15	7	16	15	4	10	6	11	13	8	6	8
macs2_2.9e9_minus_peak_497	chr1	8703852	8704173	-	322	19	15	7	14	2	5	1	6	13	7	5	9
macs2_2.9e9_minus_peak_498	chr1	8707672	8708129	-	458	5	3	10	5	5	4	2	4	2	3	4	1
macs2_2.9e9_minus_peak_499	chr1	8714593	8714803	-	211	10	7	10	10	7	1	4	1	10	9	5	7
macs2_2.9e9_minus_peak_500	chr1	8715992	8716492	-	501	123	152	117	132	50	66	51	48	61	51	73	59
macs2_2.9e9_minus_peak_501	chr1	8724263	8724760	-	498	5	2	2	2	2	0	1	5	3	2	0	0
macs2_2.9e9_minus_peak_502	chr1	8724953	8725152	-	200	0	2	0	0	1	0	0	0	0	1	2	2
macs2_2.9e9_minus_peak_503	chr1	8732143	8732350	-	208	0	4	1	1	0	2	2	0	1	1	0	1
macs2_2.9e9_minus_peak_504	chr1	8739364	8739578	-	215	1	1	0	2	1	1	2	0	1	1	1	1
macs2_2.9e9_minus_peak_505	chr1	8744977	8745211	-	235	4	2	1	1	0	0	4	1	4	2	2	2
macs2_2.9e9_minus_peak_506	chr1	8745929	8746200	-	272	20	11	20	16	12	15	6	10	20	28	21	16
macs2_2.9e9_minus_peak_507	chr1	8749085	8749303	-	219	3	3	0	3	0	3	2	1	1	3	9	2
macs2_2.9e9_minus_peak_508	chr1	8752326	8752564	-	239	5	10	1	5	0	4	3	4	2	6	3	3
macs2_2.9e9_minus_peak_509	chr1	8758628	8759349	-	722	30	25	27	24	17	17	11	9	28	23	30	18
macs2_2.9e9_minus_peak_510	chr1	8768267	8768471	-	205	6	5	2	3	2	2	0	0	7	11	2	2
macs2_2.9e9_minus_peak_511	chr1	8768884	8769086	-	203	5	6	2	3	1	0	2	0	1	4	1	1
macs2_2.9e9_minus_peak_512	chr1	8769211	8769523	-	313	24	31	22	29	12	15	9	10	23	18	20	17
macs2_2.9e9_minus_peak_513	chr1	8782001	8782213	-	213	5	4	2	5	1	2	1	0	1	1	1	3
macs2_2.9e9_minus_peak_514	chr1	8785519	8785718	-	200	3	4	1	1	5	5	2	3	12	3	2	7
macs2_2.9e9_minus_peak_515	chr1	8786110	8786454	-	345	9	7	13	11	4	6	8	8	20	14	18	15
macs2_2.9e9_minus_peak_516	chr1	8787441	8787656	-	216	2	4	2	7	3	3	0	2	5	5	5	4
macs2_2.9e9_minus_peak_517	chr1	8792764	8792963	-	200	3	2	4	9	3	4	2	2	9	3	5	1
macs2_2.9e9_minus_peak_518	chr1	8794811	8795011	-	201	1	7	2	2	2	3	5	2	7	4	4	2
macs2_2.9e9_minus_peak_519	chr1	8797550	8797874	-	325	10	19	3	9	4	8	3	7	6	8	7	4
macs2_2.9e9_minus_peak_520	chr1	8798271	8798496	-	226	5	12	5	7	1	4	0	0	4	9	11	8
macs2_2.9e9_minus_peak_521	chr1	8799916	8800201	-	286	14	10	6	12	3	7	6	5	5	16	8	8
macs2_2.9e9_minus_peak_522	chr1	8800433	8800973	-	541	22	17	25	23	11	14	12	11	35	40	32	37
macs2_2.9e9_minus_peak_523	chr1	8805747	8806013	-	267	4	2	4	7	1	0	3	3	3	3	8	1
macs2_2.9e9_minus_peak_524	chr1	8807448	8807759	-	312	29	28	16	31	11	13	9	7	32	30	31	23
macs2_2.9e9_minus_peak_525	chr1	8814151	8814476	-	326	25	27	15	23	11	18	14	8	31	22	25	26
macs2_2.9e9_minus_peak_526	chr1	8818329	8818727	-	399	20	32	14	20	13	10	12	13	40	28	30	23
macs2_2.9e9_minus_peak_527	chr1	8821919	8822134	-	216	2	2	1	2	2	0	1	1	3	5	2	1
macs2_2.9e9_minus_peak_528	chr1	8827910	8828137	-	228	7	5	7	3	0	1	1	3	11	12	2	3
macs2_2.9e9_minus_peak_529	chr1	8833767	8834497	-	731	18	29	17	26	9	23	11	10	28	33	33	26
macs2_2.9e9_minus_peak_530	chr1	8834902	8835143	-	242	12	20	4	22	5	9	10	11	28	21	22	23
macs2_2.9e9_minus_peak_531	chr1	8836672	8837069	-	398	19	13	7	8	8	12	4	5	7	8	17	11
macs2_2.9e9_minus_peak_532	chr1	8842289	8842615	-	327	52	38	32	34	22	17	16	17	51	35	63	38
macs2_2.9e9_minus_peak_533	chr1	8842835	8843039	-	205	10	8	10	2	7	3	1	1	11	13	6	4
macs2_2.9e9_minus_peak_534	chr1	8844428	8844761	-	334	16	21	11	5	4	10	6	4	16	25	24	8
macs2_2.9e9_minus_peak_535	chr1	8846084	8846284	-	201	6	8	4	5	4	3	1	3	8	7	19	1
macs2_2.9e9_minus_peak_536	chr1	8848625	8849003	-	379	21	19	17	19	7	10	9	9	38	31	38	28
macs2_2.9e9_minus_peak_537	chr1	8855272	8855706	-	435	26	12	21	25	13	17	13	14	26	25	36	31
macs2_2.9e9_minus_peak_538	chr1	8859684	8859969	-	286	25	28	12	22	11	11	12	8	27	21	19	17
macs2_2.9e9_minus_peak_539	chr1	8863683	8863895	-	213	8	3	7	0	1	1	0	1	10	6	10	2
macs2_2.9e9_minus_peak_540	chr1	8864985	8865295	-	311	10	5	8	8	2	4	4	7	11	12	20	9
macs2_2.9e9_minus_peak_541	chr1	8865777	8866070	-	294	6	12	13	13	6	2	7	3	15	14	16	11
macs2_2.9e9_minus_peak_542	chr1	8873576	8873855	-	280	35	28	25	35	12	16	14	18	40	32	37	22
macs2_2.9e9_minus_peak_543	chr1	8877039	8877246	-	208	17	21	17	19	11	9	9	3	6	5	6	7
macs2_2.9e9_minus_peak_544	chr1	8877385	8877744	-	360	133	124	137	121	64	105	61	91	142	66	143	59
macs2_2.9e9_minus_peak_545	chr1	8902010	8902209	-	200	0	0	1	0	0	1	0	0	0	0	0	0
macs2_2.9e9_minus_peak_546	chr1	8913980	8914193	-	214	2	2	0	0	1	1	0	2	2	1	1	1
macs2_2.9e9_minus_peak_547	chr1	8920927	8921460	-	534	15662	10765	14258	13093	7698	9409	7861	9288	14433	13766	12488	11934
macs2_2.9e9_minus_peak_548	chr1	8923144	8923359	-	216	369	273	323	261	116	255	121	180	144	283	11	232
macs2_2.9e9_minus_peak_549	chr1	8923796	8924064	-	269	51	22	43	42	12	28	11	11	30	32	12	25
macs2_2.9e9_minus_peak_550	chr1	8926272	8926513	-	242	88	58	99	80	64	41	64	59	99	69	135	74
macs2_2.9e9_minus_peak_551	chr1	8927545	8927764	-	220	120	85	108	107	54	77	51	60	102	44	61	88
macs2_2.9e9_minus_peak_552	chr1	8928633	8929228	-	596	480	310	851	745	330	331	359	334	330	149	204	264
macs2_2.9e9_minus_peak_553	chr1	8929990	8930560	-	571	384	200	809	606	263	300	320	334	326	187	249	208
macs2_2.9e9_minus_peak_554	chr1	8931798	8931997	-	200	131	101	121	121	84	71	81	71	104	106	156	92
macs2_2.9e9_minus_peak_555	chr1	8932363	8932568	-	206	40	25	70	49	32	32	40	31	26	21	33	34
macs2_2.9e9_minus_peak_556	chr1	8935738	8935980	-	243	24	9	30	22	19	17	19	15	26	9	7	3
macs2_2.9e9_minus_peak_557	chr1	8936348	8936662	-	315	20	15	16	22	10	8	7	15	8	4	3	10
macs2_2.9e9_minus_peak_558	chr1	8936805	8937173	-	369	44	48	57	47	47	38	20	31	35	21	24	36
macs2_2.9e9_minus_peak_559	chr1	8938499	8938738	-	240	25	9	13	15	7	10	10	6	14	13	9	9
macs2_2.9e9_minus_peak_560	chr1	9046976	9047175	-	200	0	3	2	0	0	0	1	0	4	0	1	1
macs2_2.9e9_minus_peak_561	chr1	9052497	9052714	-	218	0	3	0	0	1	1	1	1	1	0	3	3
macs2_2.9e9_minus_peak_562	chr1	9054755	9054954	-	200	1	1	0	3	0	0	0	1	1	2	0	5
macs2_2.9e9_minus_peak_563	chr1	9062945	9063150	-	206	0	0	0	0	2	0	1	1	2	4	5	1
macs2_2.9e9_minus_peak_564	chr1	9069547	9069773	-	227	1	0	0	0	0	1	1	2	0	1	5	0
macs2_2.9e9_minus_peak_565	chr1	9083775	9083975	-	201	0	2	1	1	0	0	1	0	2	0	0	1
macs2_2.9e9_minus_peak_566	chr1	9160228	9160716	-	489	216	167	111	148	51	75	53	56	107	65	113	96
macs2_2.9e9_minus_peak_567	chr1	9161236	9161442	-	207	6	6	3	3	3	3	3	3	2	1	8	8
macs2_2.9e9_minus_peak_568	chr1	9161859	9162123	-	265	8	9	7	5	2	1	2	4	6	6	8	5
macs2_2.9e9_minus_peak_569	chr1	9162773	9163134	-	362	55	34	38	33	12	26	19	20	16	23	33	24
macs2_2.9e9_minus_peak_570	chr1	9168765	9169226	-	462	0	2	1	1	0	0	0	1	1	2	1	5
macs2_2.9e9_minus_peak_571	chr1	9175268	9175507	-	240	3	4	4	2	4	3	1	1	5	1	3	1
macs2_2.9e9_minus_peak_572	chr1	9175766	9176185	-	420	7	15	18	10	7	11	3	7	19	28	12	25
macs2_2.9e9_minus_peak_573	chr1	9178985	9179201	-	217	8	1	5	9	5	3	7	3	5	4	9	3
macs2_2.9e9_minus_peak_574	chr1	9186793	9187143	-	351	18	37	45	50	31	31	27	31	43	31	31	34
macs2_2.9e9_minus_peak_575	chr1	9207960	9208725	-	766	237	240	88	108	53	73	48	51	225	236	195	234
macs2_2.9e9_minus_peak_576	chr1	9218340	9218540	-	201	1	1	4	3	0	1	1	0	4	0	0	1
macs2_2.9e9_minus_peak_577	chr1	9220531	9220749	-	219	0	2	1	1	0	1	1	0	6	2	5	2
macs2_2.9e9_minus_peak_578	chr1	9225607	9226016	-	410	246	224	85	107	75	95	63	89	366	282	387	310
macs2_2.9e9_minus_peak_579	chr1	9233188	9233493	-	306	47	35	25	22	14	23	14	17	69	55	47	42
macs2_2.9e9_minus_peak_580	chr1	9236183	9236406	-	224	7	7	3	7	3	3	0	2	3	0	13	8
macs2_2.9e9_minus_peak_581	chr1	9237762	9238096	-	335	40	19	6	8	4	7	14	3	25	16	27	26
macs2_2.9e9_minus_peak_582	chr1	9468561	9468787	-	227	0	0	2	2	0	1	1	1	2	2	1	2
macs2_2.9e9_minus_peak_583	chr1	9485048	9485374	-	327	1	1	2	4	1	2	1	0	3	2	4	3
macs2_2.9e9_minus_peak_584	chr1	9487978	9488208	-	231	3	3	3	2	3	1	2	1	0	2	3	0
macs2_2.9e9_minus_peak_585	chr1	9571880	9572079	-	200	2	1	1	0	0	2	1	1	0	0	0	0
macs2_2.9e9_minus_peak_586	chr1	9601040	9601316	-	277	0	0	1	0	4	6	0	0	0	1	1	0
macs2_2.9e9_minus_peak_587	chr1	9613209	9613408	-	200	0	1	1	0	0	0	1	0	0	0	0	0
macs2_2.9e9_minus_peak_588	chr1	9732342	9732698	-	357	27	26	14	14	16	4	7	10	23	11	27	18
macs2_2.9e9_minus_peak_589	chr1	9739737	9739989	-	253	14	14	6	8	4	8	5	9	5	13	4	13
macs2_2.9e9_minus_peak_590	chr1	9740767	9741168	-	402	71	61	39	51	20	35	28	34	49	55	37	55
macs2_2.9e9_minus_peak_591	chr1	9746307	9746668	-	362	5	15	7	8	8	2	7	7	13	9	9	10
macs2_2.9e9_minus_peak_592	chr1	9747248	9747540	-	293	13	1	5	3	0	7	3	4	1	7	1	4
macs2_2.9e9_minus_peak_593	chr1	9788919	9789631	-	713	695	599	468	486	214	279	227	299	343	269	317	278
macs2_2.9e9_minus_peak_594	chr1	9789905	9790240	-	336	84	96	91	113	53	60	58	82	59	39	64	52
macs2_2.9e9_minus_peak_595	chr1	9791136	9791376	-	241	15	16	11	19	5	8	3	3	10	4	11	4
macs2_2.9e9_minus_peak_596	chr1	9799724	9800118	-	395	27	23	15	24	11	9	8	8	12	7	9	11
macs2_2.9e9_minus_peak_597	chr1	9811155	9811706	-	552	115	101	75	95	76	63	83	57	62	59	89	61
macs2_2.9e9_minus_peak_598	chr1	9815016	9815216	-	201	4	4	1	3	0	3	0	1	3	2	1	1
macs2_2.9e9_minus_peak_599	chr1	9820647	9820982	-	336	5	8	11	8	4	2	5	4	6	2	4	5
macs2_2.9e9_minus_peak_600	chr1	9824790	9825024	-	235	3	0	0	3	5	1	6	2	4	0	8	10
macs2_2.9e9_minus_peak_601	chr1	9831849	9832288	-	440	1	3	1	1	1	3	3	3	5	10	12	5
macs2_2.9e9_minus_peak_602	chr1	9833998	9834258	-	261	8	1	2	2	1	4	1	1	4	7	5	1
macs2_2.9e9_minus_peak_603	chr1	9838447	9838746	-	300	13	4	7	2	8	4	1	2	9	6	10	9
macs2_2.9e9_minus_peak_604	chr1	9845282	9845666	-	385	13	9	6	14	2	8	9	11	12	13	14	10
macs2_2.9e9_minus_peak_605	chr1	9845757	9845972	-	216	9	6	8	10	2	2	4	4	17	9	12	15
macs2_2.9e9_minus_peak_606	chr1	9850366	9850600	-	235	2	4	5	2	4	3	2	2	0	2	4	0
macs2_2.9e9_minus_peak_607	chr1	9854670	9854965	-	296	10	12	12	6	6	6	5	7	21	11	11	7
macs2_2.9e9_minus_peak_608	chr1	9862799	9863087	-	289	1	1	2	1	0	4	1	5	8	7	1	2
macs2_2.9e9_minus_peak_609	chr1	9870834	9871091	-	258	7	3	2	2	2	2	2	3	3	5	3	2
macs2_2.9e9_minus_peak_610	chr1	9877962	9878512	-	551	15	11	12	14	10	7	15	5	16	9	21	7
macs2_2.9e9_minus_peak_611	chr1	9879983	9880279	-	297	16	13	15	7	14	13	11	12	15	20	21	15
macs2_2.9e9_minus_peak_612	chr1	9908214	9908593	-	380	92	92	63	79	34	47	34	46	56	29	42	61
macs2_2.9e9_minus_peak_613	chr1	9910052	9910615	-	564	213	214	161	234	108	135	102	119	162	156	127	129
macs2_2.9e9_minus_peak_614	chr1	9915243	9915525	-	283	11	3	3	6	1	2	4	4	2	8	6	4
macs2_2.9e9_minus_peak_615	chr1	9915704	9915937	-	234	1	2	0	4	2	3	0	1	1	1	7	3
macs2_2.9e9_minus_peak_616	chr1	9922174	9922471	-	298	2	3	1	1	2	2	4	1	0	0	3	1
macs2_2.9e9_minus_peak_617	chr1	9933701	9933900	-	200	1	1	1	1	2	0	0	0	1	0	4	1
macs2_2.9e9_minus_peak_618	chr1	9939859	9940184	-	326	28	31	15	26	13	15	13	14	42	49	33	29
macs2_2.9e9_minus_peak_619	chr1	9941006	9941522	-	517	21	15	15	20	13	14	19	6	24	25	34	24
macs2_2.9e9_minus_peak_620	chr1	9954079	9954377	-	299	1	1	4	2	3	0	1	1	3	6	4	3
macs2_2.9e9_minus_peak_621	chr1	9954484	9954710	-	227	2	3	5	4	4	5	3	6	6	12	15	4
macs2_2.9e9_minus_peak_622	chr1	9958947	9959194	-	248	0	2	6	2	0	3	2	1	4	6	7	1
macs2_2.9e9_minus_peak_623	chr1	9962669	9962914	-	246	3	0	6	2	1	1	0	1	1	1	2	4
macs2_2.9e9_minus_peak_624	chr1	9965435	9965639	-	205	0	3	3	2	0	6	0	0	2	1	4	1
macs2_2.9e9_minus_peak_625	chr1	9968358	9968587	-	230	1	1	3	2	1	1	0	0	5	0	4	1
macs2_2.9e9_minus_peak_626	chr1	9982053	9982285	-	233	5	7	11	5	3	2	1	3	2	3	3	3
macs2_2.9e9_minus_peak_627	chr1	9986309	9986827	-	519	155	133	78	79	48	70	42	63	109	106	91	90
macs2_2.9e9_minus_peak_628	chr1	9987611	9987834	-	224	60	47	36	39	20	28	17	16	48	33	48	29
macs2_2.9e9_minus_peak_629	chr1	9988218	9988523	-	306	77	45	41	52	31	38	21	21	59	43	55	39
macs2_2.9e9_minus_peak_630	chr1	9989257	9989548	-	292	38	20	24	19	9	14	8	24	21	32	19	20
macs2_2.9e9_minus_peak_631	chr1	9990055	9990461	-	407	73	79	62	64	38	60	41	52	72	38	43	57
macs2_2.9e9_minus_peak_632	chr1	9991798	9991999	-	202	48	37	37	20	11	23	27	22	30	25	40	20
macs2_2.9e9_minus_peak_633	chr1	9996435	9996684	-	250	45	25	22	15	12	10	10	6	8	11	16	12
macs2_2.9e9_minus_peak_634	chr1	9999348	9999772	-	425	11	22	14	14	12	14	6	8	4	6	5	5
macs2_2.9e9_minus_peak_635	chr1	10001167	10001423	-	257	11	6	8	12	3	2	4	6	10	1	4	7
macs2_2.9e9_minus_peak_636	chr1	10002516	10002824	-	309	41	27	23	11	13	11	11	3	14	11	20	16
macs2_2.9e9_minus_peak_637	chr1	10068439	10068655	-	217	0	1	1	1	1	0	0	0	1	0	0	0
macs2_2.9e9_minus_peak_638	chr1	10114703	10114902	-	200	0	0	0	0	1	0	0	0	1	0	0	0
macs2_2.9e9_minus_peak_639	chr1	10259500	10259699	-	200	11	4	6	8	11	5	3	6	14	10	8	8
macs2_2.9e9_minus_peak_640	chr1	10444949	10445148	-	200	0	0	1	0	1	0	1	1	0	0	1	0
macs2_2.9e9_minus_peak_641	chr1	10456934	10457211	-	278	4	3	2	6	1	1	2	4	2	3	1	2
macs2_2.9e9_minus_peak_642	chr1	10488281	10488561	-	281	1	1	1	2	0	2	0	2	0	3	5	4
macs2_2.9e9_minus_peak_643	chr1	10489814	10490126	-	313	0	0	1	1	0	1	0	0	5	2	2	2
macs2_2.9e9_minus_peak_644	chr1	10502168	10502407	-	240	8	1	3	2	1	4	0	2	1	7	6	2
macs2_2.9e9_minus_peak_645	chr1	10505962	10506180	-	219	2	8	4	7	2	3	3	8	12	7	5	6
macs2_2.9e9_minus_peak_646	chr1	10506425	10506816	-	392	9	14	16	14	3	9	3	9	13	11	15	9
macs2_2.9e9_minus_peak_647	chr1	10509946	10510180	-	235	7	4	5	4	2	7	4	5	9	19	10	9
macs2_2.9e9_minus_peak_648	chr1	10511257	10511574	-	318	14	15	11	7	4	6	2	5	12	10	11	7
macs2_2.9e9_minus_peak_649	chr1	10516511	10516989	-	479	308	260	218	210	93	169	96	152	283	248	159	206
macs2_2.9e9_minus_peak_650	chr1	10517638	10517857	-	220	118	85	48	55	27	50	40	41	102	112	72	64
macs2_2.9e9_minus_peak_651	chr1	10518500	10519050	-	551	839	854	531	669	464	502	342	476	929	712	1062	707
macs2_2.9e9_minus_peak_652	chr1	10519437	10519648	-	212	46	47	36	33	24	41	25	30	72	54	48	49
macs2_2.9e9_minus_peak_653	chr1	10520264	10520694	-	431	404	290	261	257	217	214	205	210	424	327	438	325
macs2_2.9e9_minus_peak_654	chr1	10520812	10521482	-	671	242	235	206	277	178	206	176	204	318	275	278	274
macs2_2.9e9_minus_peak_655	chr1	10522477	10522713	-	237	45	44	78	68	24	42	34	42	56	47	47	47
macs2_2.9e9_minus_peak_656	chr1	10522842	10523150	-	309	163	142	191	225	108	141	117	165	135	110	121	113
macs2_2.9e9_minus_peak_657	chr1	10528714	10528947	-	234	12	16	30	22	11	9	12	17	13	13	15	10
macs2_2.9e9_minus_peak_658	chr1	10529466	10530136	-	671	61	80	80	69	43	57	62	54	88	54	46	74
macs2_2.9e9_minus_peak_659	chr1	10542355	10542577	-	223	0	1	1	0	1	0	0	0	0	5	4	3
macs2_2.9e9_minus_peak_660	chr1	10637472	10637703	-	232	130	148	150	137	36	140	76	90	153	146	30	97
macs2_2.9e9_minus_peak_661	chr1	10646542	10646743	-	202	6	1	5	2	1	2	1	2	3	4	2	2
macs2_2.9e9_minus_peak_662	chr1	10681330	10681557	-	228	0	0	1	1	3	0	0	0	5	2	2	0
macs2_2.9e9_minus_peak_663	chr1	10696609	10697423	-	815	25	22	16	15	1	7	1	10	26	18	23	19
macs2_2.9e9_minus_peak_664	chr1	10707133	10707611	-	479	39	57	44	48	35	51	54	62	83	71	89	57
macs2_2.9e9_minus_peak_665	chr1	10711714	10711937	-	224	1	3	3	1	2	4	4	3	7	3	2	4
macs2_2.9e9_minus_peak_666	chr1	10712522	10712840	-	319	6	5	4	4	5	2	5	4	2	3	5	2
macs2_2.9e9_minus_peak_667	chr1	10717940	10718236	-	297	2	0	5	2	0	1	2	2	4	1	1	2
macs2_2.9e9_minus_peak_668	chr1	10732621	10732871	-	251	1	2	4	5	2	3	1	0	3	2	8	3
macs2_2.9e9_minus_peak_669	chr1	10740862	10741485	-	624	14	5	6	9	3	2	5	3	22	19	19	19
macs2_2.9e9_minus_peak_670	chr1	10751025	10751328	-	304	6	20	8	20	10	21	6	15	26	18	35	21
macs2_2.9e9_minus_peak_671	chr1	10756132	10756369	-	238	4	0	1	5	1	2	1	0	1	2	3	2
macs2_2.9e9_minus_peak_672	chr1	10777354	10777624	-	271	10	12	14	16	7	8	6	9	21	26	16	13
macs2_2.9e9_minus_peak_673	chr1	10788563	10788805	-	243	5	0	0	0	0	1	0	4	2	2	1	6
macs2_2.9e9_minus_peak_674	chr1	10794287	10794521	-	235	1	0	2	5	1	2	2	0	6	2	2	3
macs2_2.9e9_minus_peak_675	chr1	10798837	10799243	-	407	7	10	10	5	2	4	3	9	12	9	10	14
macs2_2.9e9_minus_peak_676	chr1	10805153	10805394	-	242	0	1	1	2	1	0	1	0	2	6	7	3
macs2_2.9e9_minus_peak_677	chr1	10810220	10810610	-	391	4	5	3	1	2	3	7	6	25	22	14	19
macs2_2.9e9_minus_peak_678	chr1	10814228	10814495	-	268	2	2	0	4	1	1	5	4	8	16	10	9
macs2_2.9e9_minus_peak_679	chr1	10817680	10817954	-	275	5	8	7	10	4	11	1	7	30	41	27	31
macs2_2.9e9_minus_peak_680	chr1	10820489	10820708	-	220	3	1	2	1	0	1	0	3	5	6	8	7
macs2_2.9e9_minus_peak_681	chr1	10830001	10830268	-	268	2	1	2	0	0	6	2	3	4	2	5	1
macs2_2.9e9_minus_peak_682	chr1	10830382	10830586	-	205	0	0	3	1	0	0	0	1	2	2	3	2
macs2_2.9e9_minus_peak_683	chr1	10835315	10835523	-	209	1	0	1	2	3	0	0	1	0	1	4	0
macs2_2.9e9_minus_peak_684	chr1	10839233	10839528	-	296	3	3	7	3	4	2	1	5	3	2	6	1
macs2_2.9e9_minus_peak_685	chr1	10845161	10845468	-	308	9	3	1	0	2	1	0	1	3	5	4	2
macs2_2.9e9_minus_peak_686	chr1	10849501	10849722	-	222	0	3	0	3	2	1	1	0	4	1	1	1
macs2_2.9e9_minus_peak_687	chr1	10852180	10852380	-	201	2	1	0	3	1	3	1	0	1	2	2	2
macs2_2.9e9_minus_peak_688	chr1	10861955	10862204	-	250	1	4	1	3	3	1	1	2	2	2	1	4
macs2_2.9e9_minus_peak_689	chr1	10902099	10902298	-	200	1	2	1	1	0	0	0	2	0	2	0	0
macs2_2.9e9_minus_peak_690	chr1	11036302	11036509	-	208	1	2	1	2	1	1	0	0	2	2	1	1
macs2_2.9e9_minus_peak_691	chr1	11083483	11083698	-	216	3	1	1	0	2	0	2	0	1	1	0	0
macs2_2.9e9_minus_peak_692	chr1	11114526	11115571	-	1046	1634	1406	1418	1355	730	1068	884	1156	1868	1709	1451	1341
macs2_2.9e9_minus_peak_693	chr1	11115676	11116078	-	403	37	27	42	29	9	18	17	22	38	42	8	20
macs2_2.9e9_minus_peak_694	chr1	11117380	11117721	-	342	57	52	45	61	25	40	48	34	67	42	53	49
macs2_2.9e9_minus_peak_695	chr1	11126540	11126803	-	264	505	460	418	441	250	356	275	377	591	441	483	489
macs2_2.9e9_minus_peak_696	chr1	11127887	11128139	-	253	268	241	195	230	101	125	117	167	198	241	188	260
macs2_2.9e9_minus_peak_697	chr1	11128527	11128743	-	217	49	44	49	41	13	29	22	19	33	45	16	34
macs2_2.9e9_minus_peak_698	chr1	11129452	11129760	-	309	46	32	34	35	11	29	15	17	25	35	10	25
macs2_2.9e9_minus_peak_699	chr1	11130791	11130990	-	200	14	5	3	5	3	7	2	4	3	9	6	4
macs2_2.9e9_minus_peak_700	chr1	11136872	11137473	-	602	63	60	64	59	41	31	54	33	41	26	47	49
macs2_2.9e9_minus_peak_701	chr1	11138632	11138868	-	237	8	8	13	24	5	8	9	18	11	5	7	10
macs2_2.9e9_minus_peak_702	chr1	11144423	11144751	-	329	13	5	7	7	2	4	5	5	2	0	2	6
macs2_2.9e9_minus_peak_703	chr1	11146445	11146713	-	269	39	39	34	50	25	30	28	31	21	29	30	26
macs2_2.9e9_minus_peak_704	chr1	11149949	11150172	-	224	15	14	39	17	12	9	9	18	20	5	20	4
macs2_2.9e9_minus_peak_705	chr1	11152171	11152375	-	205	4	6	1	2	2	3	4	5	7	3	2	5
macs2_2.9e9_minus_peak_706	chr1	11156410	11156655	-	246	11	7	12	10	2	6	7	7	6	4	6	15
macs2_2.9e9_minus_peak_707	chr1	11157954	11158162	-	209	15	8	6	3	3	1	8	5	7	3	9	3
macs2_2.9e9_minus_peak_708	chr1	11166456	11166992	-	537	183	180	99	122	45	83	69	94	151	113	111	103
macs2_2.9e9_minus_peak_709	chr1	11173516	11173828	-	313	8	8	7	4	1	8	3	7	8	5	2	9
macs2_2.9e9_minus_peak_710	chr1	11176284	11176499	-	216	5	4	2	2	2	5	3	1	3	3	4	2
macs2_2.9e9_minus_peak_711	chr1	11176773	11177072	-	300	17	9	12	16	4	6	2	4	11	2	6	8
macs2_2.9e9_minus_peak_712	chr1	11178578	11178943	-	366	71	51	52	41	32	42	30	44	32	39	57	41
macs2_2.9e9_minus_peak_713	chr1	11182499	11182719	-	221	5	7	4	6	1	0	1	1	1	4	3	1
macs2_2.9e9_minus_peak_714	chr1	11183401	11183795	-	395	11	6	9	3	3	4	2	8	4	0	4	5
macs2_2.9e9_minus_peak_715	chr1	11187528	11187761	-	234	2	4	1	2	2	0	0	6	1	0	2	2
macs2_2.9e9_minus_peak_716	chr1	11192435	11193090	-	656	11	7	4	21	5	6	8	8	2	4	4	3
macs2_2.9e9_minus_peak_717	chr1	11196519	11196962	-	444	4	3	3	3	1	1	3	3	1	4	4	1
macs2_2.9e9_minus_peak_718	chr1	11201083	11201324	-	242	3	3	3	2	3	4	3	3	5	3	3	3
macs2_2.9e9_minus_peak_719	chr1	11203785	11204134	-	350	8	11	3	8	2	1	7	4	4	2	1	2
macs2_2.9e9_minus_peak_720	chr1	11231254	11231534	-	281	4	1	3	3	2	1	0	2	1	3	4	1
macs2_2.9e9_minus_peak_721	chr1	11243239	11243479	-	241	10	1	6	7	1	7	5	2	12	6	8	7
macs2_2.9e9_minus_peak_722	chr1	11244109	11244337	-	229	11	7	1	3	1	4	1	2	6	1	2	2
macs2_2.9e9_minus_peak_723	chr1	11245013	11245419	-	407	8	5	0	4	4	0	4	1	5	2	0	1
macs2_2.9e9_minus_peak_724	chr1	11251230	11251489	-	260	4	3	6	4	3	3	1	0	8	4	6	3
macs2_2.9e9_minus_peak_725	chr1	11267377	11267857	-	481	8	6	4	5	1	1	4	3	6	8	5	6
macs2_2.9e9_minus_peak_726	chr1	11277511	11277710	-	200	1	3	1	1	0	0	0	0	1	0	1	1
macs2_2.9e9_minus_peak_727	chr1	11280956	11281156	-	201	1	2	3	3	1	1	0	0	6	1	3	1
macs2_2.9e9_minus_peak_728	chr1	11283101	11283429	-	329	4	7	2	3	1	0	3	1	5	2	2	1
macs2_2.9e9_minus_peak_729	chr1	11285364	11285579	-	216	3	0	0	1	1	0	0	4	4	0	3	1
macs2_2.9e9_minus_peak_730	chr1	11291831	11292074	-	244	6	2	4	2	1	0	0	2	1	0	1	4
macs2_2.9e9_minus_peak_731	chr1	11296095	11296351	-	257	3	2	0	1	3	1	1	3	0	1	0	3
macs2_2.9e9_minus_peak_732	chr1	11296479	11296725	-	247	1	4	3	0	3	5	0	3	2	4	3	3
macs2_2.9e9_minus_peak_733	chr1	11311602	11311832	-	231	4	5	3	4	3	6	4	3	8	2	2	10
macs2_2.9e9_minus_peak_734	chr1	11312213	11312577	-	365	22	18	10	18	4	8	4	13	9	13	7	20
macs2_2.9e9_minus_peak_735	chr1	11313706	11314005	-	300	33	29	19	23	10	16	19	15	17	24	29	17
macs2_2.9e9_minus_peak_736	chr1	11315893	11316125	-	233	8	1	4	4	4	5	3	3	4	3	4	4
macs2_2.9e9_minus_peak_737	chr1	11627989	11628188	-	200	0	1	4	0	1	2	0	1	0	1	0	0
macs2_2.9e9_minus_peak_738	chr1	11695631	11695835	-	205	0	0	6	1	1	3	0	0	0	0	3	0
macs2_2.9e9_minus_peak_739	chr1	11708307	11708793	-	487	51	33	37	38	23	23	28	22	49	61	75	66
macs2_2.9e9_minus_peak_740	chr1	11717159	11717401	-	243	6	7	2	0	0	1	1	0	2	1	0	1
macs2_2.9e9_minus_peak_741	chr1	11720766	11721092	-	327	19	21	2	4	2	2	2	1	10	5	11	2
macs2_2.9e9_minus_peak_742	chr1	11725913	11726332	-	420	16	17	7	12	4	6	2	5	2	5	3	6
macs2_2.9e9_minus_peak_743	chr1	11729431	11729801	-	371	28	30	14	9	8	5	1	5	7	11	17	15
macs2_2.9e9_minus_peak_744	chr1	11734386	11734852	-	467	537	349	493	463	197	387	304	361	526	476	368	423
macs2_2.9e9_minus_peak_745	chr1	11734967	11735168	-	202	12	4	16	4	0	10	3	9	9	8	3	5
macs2_2.9e9_minus_peak_746	chr1	11845654	11846869	-	1216	124	109	65	82	48	72	44	41	73	99	93	79
macs2_2.9e9_minus_peak_747	chr1	11849905	11850165	-	261	6	3	6	7	3	11	4	2	19	5	7	12
macs2_2.9e9_minus_peak_748	chr1	11853429	11853676	-	248	3	0	1	5	1	5	0	5	3	3	2	3
macs2_2.9e9_minus_peak_749	chr1	11858296	11858560	-	265	2	2	11	13	1	3	3	4	4	0	0	3
macs2_2.9e9_minus_peak_750	chr1	11859569	11859853	-	285	11	16	18	18	12	10	4	9	11	6	5	7
macs2_2.9e9_minus_peak_751	chr1	11933301	11933505	-	205	1	3	1	1	0	2	1	1	2	1	5	2
macs2_2.9e9_minus_peak_752	chr1	11969735	11969978	-	244	2	1	1	4	0	2	1	3	6	2	6	1
macs2_2.9e9_minus_peak_753	chr1	11972469	11972754	-	286	3	0	3	2	0	1	0	1	1	2	1	1
macs2_2.9e9_minus_peak_754	chr1	11979521	11980267	-	747	721	757	538	706	275	393	341	380	536	410	504	511
macs2_2.9e9_minus_peak_755	chr1	11982123	11982432	-	310	22	18	27	18	11	13	15	14	19	19	13	17
macs2_2.9e9_minus_peak_756	chr1	11989112	11989494	-	383	3	2	7	2	2	3	0	2	2	3	1	1
macs2_2.9e9_minus_peak_757	chr1	12053153	12053363	-	211	6	3	2	5	5	2	2	5	4	2	3	2
macs2_2.9e9_minus_peak_758	chr1	12060182	12060381	-	200	0	1	0	0	3	0	0	3	1	0	0	0
macs2_2.9e9_minus_peak_759	chr1	12077953	12078466	-	514	8	1	0	4	2	2	1	1	7	5	6	2
macs2_2.9e9_minus_peak_760	chr1	12108741	12109005	-	265	1	0	2	0	0	1	1	2	0	0	1	4
macs2_2.9e9_minus_peak_761	chr1	12441967	12442270	-	304	1	1	3	1	1	0	0	2	1	1	0	0
macs2_2.9e9_minus_peak_762	chr1	12555059	12555259	-	201	1	0	0	1	2	0	0	0	0	0	0	0
macs2_2.9e9_minus_peak_763	chr1	12599692	12599939	-	248	5	1	5	2	3	1	1	0	1	2	1	0
macs2_2.9e9_minus_peak_764	chr1	12611496	12611846	-	351	3	18	1	10	4	8	5	4	15	17	9	8
macs2_2.9e9_minus_peak_765	chr1	12627802	12628385	-	584	63	60	43	59	24	47	33	32	25	25	33	29
macs2_2.9e9_minus_peak_766	chr1	12634122	12634326	-	205	2	2	3	2	2	3	0	0	2	0	1	2
macs2_2.9e9_minus_peak_767	chr1	12635497	12635699	-	203	1	1	0	1	2	2	1	0	0	1	2	1
macs2_2.9e9_minus_peak_768	chr1	12641805	12642062	-	258	2	2	1	3	4	3	0	3	3	4	8	3
macs2_2.9e9_minus_peak_769	chr1	12649299	12649638	-	340	4	4	3	6	4	2	3	2	7	8	4	1
macs2_2.9e9_minus_peak_770	chr1	12658322	12658526	-	205	0	0	0	1	1	1	0	1	3	5	0	2
macs2_2.9e9_minus_peak_771	chr1	12659556	12659757	-	202	1	2	0	1	1	0	1	0	3	0	2	0
macs2_2.9e9_minus_peak_772	chr1	12660964	12661169	-	206	0	1	0	4	1	1	0	1	2	6	2	3
macs2_2.9e9_minus_peak_773	chr1	12663249	12663490	-	242	6	1	0	5	1	5	0	1	2	2	8	1
macs2_2.9e9_minus_peak_774	chr1	12670004	12670404	-	401	19	17	4	14	7	12	9	5	13	6	26	10
macs2_2.9e9_minus_peak_775	chr1	12672193	12672462	-	270	21	17	17	19	7	7	5	8	27	11	31	17
macs2_2.9e9_minus_peak_776	chr1	12674576	12674984	-	409	87	61	62	89	41	43	34	24	89	73	102	65
macs2_2.9e9_minus_peak_777	chr1	12678770	12679012	-	243	9	2	5	5	4	3	4	6	18	4	10	8
macs2_2.9e9_minus_peak_778	chr1	13720611	13720813	-	203	0	0	0	0	0	0	0	0	0	0	0	0
macs2_2.9e9_minus_peak_779	chr1	14023868	14024090	-	223	1	2	0	2	1	2	0	0	0	1	1	0
macs2_2.9e9_minus_peak_780	chr1	14025045	14025256	-	212	3	2	0	1	1	3	1	3	2	2	0	1
macs2_2.9e9_minus_peak_781	chr1	14341831	14342064	-	234	1	1	1	1	0	3	1	3	2	2	0	0
macs2_2.9e9_minus_peak_782	chr1	14923013	14923274	-	262	2	2	0	2	0	1	0	3	4	5	1	1
macs2_2.9e9_minus_peak_783	chr1	15008102	15008478	-	377	7	9	43	28	17	42	28	27	53	25	38	26
macs2_2.9e9_minus_peak_784	chr1	15053800	15054022	-	223	2	3	8	4	1	8	1	1	7	4	1	2
macs2_2.9e9_minus_peak_785	chr1	15260630	15260829	-	200	0	0	0	0	0	1	1	0	0	6	1	1
macs2_2.9e9_minus_peak_786	chr1	15391411	15391610	-	200	0	0	2	1	2	0	0	0	2	2	0	1
macs2_2.9e9_minus_peak_787	chr1	15417726	15417940	-	215	2	0	0	2	1	0	0	3	1	2	0	2
macs2_2.9e9_minus_peak_788	chr1	15442348	15442594	-	247	3	2	3	2	1	2	0	2	0	0	2	1
macs2_2.9e9_minus_peak_789	chr1	15729339	15729793	-	455	16	10	14	10	5	7	4	7	19	16	13	12
macs2_2.9e9_minus_peak_790	chr1	15734876	15735123	-	248	1	2	2	2	1	1	0	0	0	0	0	1
macs2_2.9e9_minus_peak_791	chr1	15816129	15816349	-	221	26	27	13	12	8	10	7	9	12	15	18	21
macs2_2.9e9_minus_peak_792	chr1	15818643	15819151	-	509	102	84	65	56	31	55	38	56	124	94	89	80
macs2_2.9e9_minus_peak_793	chr1	15826504	15826915	-	412	7	1	6	4	1	2	5	6	2	4	0	9
macs2_2.9e9_minus_peak_794	chr1	15828154	15828487	-	334	18	11	13	10	4	6	8	8	25	14	17	13
macs2_2.9e9_minus_peak_795	chr1	15834800	15835060	-	261	20	24	20	25	18	8	19	21	49	26	32	30
macs2_2.9e9_minus_peak_796	chr1	15836652	15836943	-	292	14	5	10	7	4	9	9	7	9	12	8	14
macs2_2.9e9_minus_peak_797	chr1	15837709	15837965	-	257	2	2	2	4	3	1	5	2	4	2	2	3
macs2_2.9e9_minus_peak_798	chr1	15842922	15843143	-	222	2	0	1	2	0	0	1	0	3	3	1	1
macs2_2.9e9_minus_peak_799	chr1	15850133	15850379	-	247	2	2	2	2	1	0	0	1	0	0	1	2
macs2_2.9e9_minus_peak_800	chr1	15898109	15898435	-	327	12	10	7	8	7	6	2	9	10	17	8	13
macs2_2.9e9_minus_peak_801	chr1	15899253	15899453	-	201	2	2	1	1	0	4	0	2	3	4	9	3
macs2_2.9e9_minus_peak_802	chr1	15899699	15900156	-	458	3	6	5	7	2	6	2	2	0	7	5	5
macs2_2.9e9_minus_peak_803	chr1	15910539	15910940	-	402	7	5	7	4	4	14	3	8	7	7	6	4
macs2_2.9e9_minus_peak_804	chr1	15928223	15928446	-	224	1	1	1	0	2	2	1	0	0	0	0	0
macs2_2.9e9_minus_peak_805	chr1	15942491	15942704	-	214	2	0	4	2	4	0	3	2	2	3	6	2
macs2_2.9e9_minus_peak_806	chr1	15997691	15997890	-	200	0	1	1	2	2	1	1	0	0	0	2	1
macs2_2.9e9_minus_peak_807	chr1	16116295	16116609	-	315	1	9	2	0	1	2	1	0	0	0	1	0
macs2_2.9e9_minus_peak_808	chr1	16121367	16121611	-	245	0	5	7	4	6	2	1	1	0	4	2	2
macs2_2.9e9_minus_peak_809	chr1	16130427	16130626	-	200	0	2	4	2	3	3	4	1	4	2	6	3
macs2_2.9e9_minus_peak_810	chr1	16133533	16134137	-	605	57	44	37	28	15	31	14	25	46	38	30	35
macs2_2.9e9_minus_peak_811	chr1	16139058	16139324	-	267	7	9	0	1	0	4	1	0	2	3	3	1
macs2_2.9e9_minus_peak_812	chr1	16142244	16142527	-	284	28	24	8	8	2	9	3	9	20	29	23	7
macs2_2.9e9_minus_peak_813	chr1	16145461	16145671	-	211	2	6	2	1	2	2	0	2	1	1	1	4
macs2_2.9e9_minus_peak_814	chr1	16150300	16150499	-	200	3	2	0	5	3	1	1	2	1	1	3	3
macs2_2.9e9_minus_peak_815	chr1	16152398	16152741	-	344	21	21	1	3	7	11	5	3	12	8	9	10
macs2_2.9e9_minus_peak_816	chr1	16158594	16158827	-	234	15	17	10	8	7	5	6	8	9	12	14	10
macs2_2.9e9_minus_peak_817	chr1	16160475	16161327	-	853	439	308	368	387	187	198	165	207	307	314	284	303
macs2_2.9e9_minus_peak_818	chr1	16171223	16171952	-	730	26	23	10	25	9	14	7	7	16	8	9	17
macs2_2.9e9_minus_peak_819	chr1	16182433	16182638	-	206	2	0	1	0	1	0	1	0	1	0	3	0
macs2_2.9e9_minus_peak_820	chr1	16186322	16186553	-	232	0	0	4	0	2	0	1	0	4	2	1	0
macs2_2.9e9_minus_peak_821	chr1	16212555	16212841	-	287	8	9	0	1	0	1	0	1	0	1	1	0
macs2_2.9e9_minus_peak_822	chr1	16225564	16225948	-	385	2	0	5	6	5	2	3	0	2	1	4	6
macs2_2.9e9_minus_peak_823	chr1	16266792	16267026	-	235	14	6	5	2	2	3	3	1	2	4	6	4
macs2_2.9e9_minus_peak_824	chr1	16268232	16268896	-	665	123	109	116	78	52	62	58	65	95	80	71	74
macs2_2.9e9_minus_peak_825	chr1	16281542	16281759	-	218	0	2	1	2	1	3	0	0	4	4	0	3
macs2_2.9e9_minus_peak_826	chr1	16296351	16296584	-	234	3	2	0	4	1	1	1	0	3	1	2	0
macs2_2.9e9_minus_peak_827	chr1	16298245	16298550	-	306	30	29	20	23	10	22	10	11	30	16	21	9
macs2_2.9e9_minus_peak_828	chr1	16300727	16301043	-	317	3	2	1	5	1	6	4	1	4	0	1	2
macs2_2.9e9_minus_peak_829	chr1	16360945	16361179	-	235	0	0	0	0	0	0	0	0	0	0	0	0
macs2_2.9e9_minus_peak_830	chr1	16384129	16384536	-	408	2	3	7	8	2	4	2	6	15	9	6	13
macs2_2.9e9_minus_peak_831	chr1	16392284	16392505	-	222	0	0	1	5	1	2	2	1	4	5	6	7
macs2_2.9e9_minus_peak_832	chr1	16450717	16451183	-	467	314	272	297	284	102	229	182	199	600	578	163	458
macs2_2.9e9_minus_peak_833	chr1	16474271	16474614	-	344	0	0	2	0	1	1	4	0	4	2	3	5
macs2_2.9e9_minus_peak_834	chr1	16524451	16524816	-	366	50	32	47	42	27	39	29	25	37	47	57	48
macs2_2.9e9_minus_peak_835	chr1	16540895	16541094	-	200	0	1	0	1	0	2	0	0	1	1	1	1
macs2_2.9e9_minus_peak_836	chr1	16548679	16548892	-	214	4	0	2	1	0	2	3	0	1	0	0	1
macs2_2.9e9_minus_peak_837	chr1	16555036	16555377	-	342	86	86	33	52	31	41	22	28	36	71	54	65
macs2_2.9e9_minus_peak_838	chr1	16558097	16558478	-	382	8	7	15	9	8	12	5	12	12	10	12	9
macs2_2.9e9_minus_peak_839	chr1	16562083	16562282	-	200	0	1	1	2	1	3	1	0	1	2	1	2
macs2_2.9e9_minus_peak_840	chr1	16567410	16567845	-	436	29	25	18	20	7	21	12	17	29	24	10	30
macs2_2.9e9_minus_peak_841	chr1	16573219	16573657	-	439	49	29	25	34	19	39	17	20	48	46	41	38
macs2_2.9e9_minus_peak_842	chr1	16576303	16577352	-	1050	93	73	65	72	37	51	51	39	74	51	74	55
macs2_2.9e9_minus_peak_843	chr1	16581311	16581583	-	273	22	35	18	37	14	15	27	18	22	10	15	9
macs2_2.9e9_minus_peak_844	chr1	16584384	16584984	-	601	40	24	33	42	20	22	28	23	61	41	44	33
macs2_2.9e9_minus_peak_845	chr1	16587143	16587463	-	321	20	7	17	8	3	6	6	2	8	5	7	8
macs2_2.9e9_minus_peak_846	chr1	16589129	16589331	-	203	8	4	3	5	1	2	2	3	3	7	8	3
macs2_2.9e9_minus_peak_847	chr1	16590199	16590475	-	277	4	11	8	3	2	2	2	1	2	5	4	2
macs2_2.9e9_minus_peak_848	chr1	16595831	16596036	-	206	3	1	1	1	1	0	0	0	2	1	5	1
macs2_2.9e9_minus_peak_849	chr1	16596232	16596464	-	233	7	2	2	4	3	6	2	3	7	4	3	0
macs2_2.9e9_minus_peak_850	chr1	16600991	16601192	-	202	5	8	3	3	0	4	1	1	8	5	1	5
macs2_2.9e9_minus_peak_851	chr1	16603762	16603996	-	235	2	11	4	5	2	2	2	3	7	7	7	7
macs2_2.9e9_minus_peak_852	chr1	16604904	16605184	-	281	2	4	7	6	3	3	2	5	5	5	12	2
macs2_2.9e9_minus_peak_853	chr1	16607841	16608249	-	409	16	24	17	10	5	9	13	12	16	11	15	8
macs2_2.9e9_minus_peak_854	chr1	16612242	16612634	-	393	17	4	15	21	7	9	10	13	21	12	21	12
macs2_2.9e9_minus_peak_855	chr1	16618697	16618959	-	263	14	14	19	22	5	12	7	16	19	10	13	15
macs2_2.9e9_minus_peak_856	chr1	16619838	16620102	-	265	7	10	13	18	9	5	3	13	10	16	8	18
macs2_2.9e9_minus_peak_857	chr1	16622186	16622395	-	210	4	1	3	1	4	4	1	5	7	7	0	3
macs2_2.9e9_minus_peak_858	chr1	16634877	16635339	-	463	24	27	25	45	16	28	18	19	55	21	47	26
macs2_2.9e9_minus_peak_859	chr1	16635448	16635752	-	305	21	18	19	22	8	10	19	8	16	10	19	24
macs2_2.9e9_minus_peak_860	chr1	16639201	16639424	-	224	11	6	11	7	10	4	2	3	14	6	12	6
macs2_2.9e9_minus_peak_861	chr1	16645359	16645558	-	200	3	4	3	6	0	5	4	2	5	2	3	4
macs2_2.9e9_minus_peak_862	chr1	16646880	16647249	-	370	4	1	0	4	3	4	4	0	9	3	9	9
macs2_2.9e9_minus_peak_863	chr1	16648101	16648316	-	216	8	9	4	10	2	2	8	4	9	11	14	7
macs2_2.9e9_minus_peak_864	chr1	16652037	16652276	-	240	5	3	3	3	5	5	2	5	19	9	13	3
macs2_2.9e9_minus_peak_865	chr1	16653437	16653640	-	204	0	2	0	4	2	2	5	2	4	4	1	1
macs2_2.9e9_minus_peak_866	chr1	16658927	16659173	-	247	5	2	5	3	2	3	5	3	12	7	12	5
macs2_2.9e9_minus_peak_867	chr1	16661897	16662099	-	203	7	4	3	6	4	5	2	3	8	9	4	4
macs2_2.9e9_minus_peak_868	chr1	16662598	16662967	-	370	18	9	9	9	6	6	9	6	23	16	10	12
macs2_2.9e9_minus_peak_869	chr1	16665203	16665417	-	215	9	12	9	6	8	4	4	7	20	8	10	13
macs2_2.9e9_minus_peak_870	chr1	16665534	16665757	-	224	2	3	3	3	2	1	3	2	3	1	7	6
macs2_2.9e9_minus_peak_871	chr1	16666602	16666940	-	339	11	14	15	12	5	11	7	6	7	5	19	1
macs2_2.9e9_minus_peak_872	chr1	16670721	16670971	-	251	5	1	6	4	4	7	6	4	3	10	5	1
macs2_2.9e9_minus_peak_873	chr1	16671797	16672011	-	215	9	10	4	10	4	1	6	5	6	10	9	8
macs2_2.9e9_minus_peak_874	chr1	16675542	16675782	-	241	3	7	1	5	2	3	1	0	9	2	4	3
macs2_2.9e9_minus_peak_875	chr1	16677851	16678123	-	273	19	8	26	24	14	14	14	15	26	22	28	20
macs2_2.9e9_minus_peak_876	chr1	16690512	16690711	-	200	0	2	2	0	1	0	0	0	4	1	1	0
macs2_2.9e9_minus_peak_877	chr1	16692698	16692913	-	216	2	0	3	1	1	1	0	0	1	1	2	2
macs2_2.9e9_minus_peak_878	chr1	16695745	16695977	-	233	1	1	0	1	0	1	1	0	0	0	1	0
macs2_2.9e9_minus_peak_879	chr1	16755521	16755744	-	224	1	1	4	0	5	2	2	2	2	0	1	1
macs2_2.9e9_minus_peak_880	chr1	16758470	16758669	-	200	1	0	1	1	1	0	1	0	0	1	1	0
macs2_2.9e9_minus_peak_881	chr1	16766244	16766493	-	250	1	1	2	1	3	1	0	0	1	0	2	1
macs2_2.9e9_minus_peak_882	chr1	16776685	16777169	-	485	2	5	0	1	2	2	0	1	2	5	5	4
macs2_2.9e9_minus_peak_883	chr1	16778927	16779126	-	200	1	1	0	1	0	1	0	1	3	0	1	0
macs2_2.9e9_minus_peak_884	chr1	16784158	16784368	-	211	5	5	2	1	0	1	2	2	5	1	2	4
macs2_2.9e9_minus_peak_885	chr1	16787053	16787258	-	206	5	7	1	3	0	0	3	1	5	8	9	3
macs2_2.9e9_minus_peak_886	chr1	16789884	16790155	-	272	8	11	1	7	4	0	1	3	10	5	7	2
macs2_2.9e9_minus_peak_887	chr1	16790924	16791186	-	263	25	27	13	24	6	14	12	13	17	19	14	24
macs2_2.9e9_minus_peak_888	chr1	16793208	16793468	-	261	16	11	6	14	1	8	9	6	22	10	15	8
macs2_2.9e9_minus_peak_889	chr1	16794339	16794562	-	224	22	16	12	15	5	5	5	6	11	11	5	9
macs2_2.9e9_minus_peak_890	chr1	16797080	16797298	-	219	12	7	13	16	6	7	4	6	11	2	8	3
macs2_2.9e9_minus_peak_891	chr1	16798891	16799227	-	337	16	5	9	5	5	6	1	8	6	5	2	7
macs2_2.9e9_minus_peak_892	chr1	16799629	16800487	-	859	27	25	22	28	16	19	10	8	35	11	19	19
macs2_2.9e9_minus_peak_893	chr1	16805955	16806199	-	245	4	7	5	7	5	6	2	9	14	8	5	5
macs2_2.9e9_minus_peak_894	chr1	16808013	16808230	-	218	5	2	7	6	3	0	2	1	2	2	3	5
macs2_2.9e9_minus_peak_895	chr1	16809539	16809781	-	243	3	5	2	4	2	0	2	3	0	2	1	0
macs2_2.9e9_minus_peak_896	chr1	16823216	16823415	-	200	2	1	1	0	1	4	0	2	2	1	0	0
macs2_2.9e9_minus_peak_897	chr1	16823530	16823807	-	278	19	24	12	21	13	12	10	17	22	14	14	19
macs2_2.9e9_minus_peak_898	chr1	16834317	16834548	-	232	3	2	0	0	1	0	0	1	2	1	3	0
macs2_2.9e9_minus_peak_899	chr1	16835415	16835663	-	249	9	3	1	1	0	1	0	1	7	3	1	0
macs2_2.9e9_minus_peak_900	chr1	16840433	16840771	-	339	1	3	0	2	0	0	2	0	0	5	2	2
macs2_2.9e9_minus_peak_901	chr1	16853205	16853414	-	210	1	1	0	0	2	0	0	0	1	1	2	1
macs2_2.9e9_minus_peak_902	chr1	16858482	16858863	-	382	5	3	5	1	3	3	2	4	7	5	4	1
macs2_2.9e9_minus_peak_903	chr1	16860407	16860613	-	207	2	2	1	0	0	0	0	1	1	3	3	1
macs2_2.9e9_minus_peak_904	chr1	16871502	16871703	-	202	1	1	2	0	0	4	0	0	0	0	3	0
macs2_2.9e9_minus_peak_905	chr1	16872301	16872501	-	201	0	0	1	0	1	1	0	0	1	0	4	0
macs2_2.9e9_minus_peak_906	chr1	16888714	16889732	-	1019	354	311	242	316	102	196	151	196	419	436	369	364
macs2_2.9e9_minus_peak_907	chr1	16893553	16893775	-	223	11	11	5	15	8	6	3	5	8	15	29	4
macs2_2.9e9_minus_peak_908	chr1	16896180	16896398	-	219	0	0	0	0	0	0	4	2	0	1	1	4
macs2_2.9e9_minus_peak_909	chr1	16897313	16897519	-	207	2	1	0	1	0	1	0	1	0	0	0	2
macs2_2.9e9_minus_peak_910	chr1	16906126	16906465	-	340	2	10	7	7	6	5	5	2	0	9	6	2
macs2_2.9e9_minus_peak_911	chr1	16911083	16911294	-	212	1	1	2	1	0	2	0	0	2	0	0	0
macs2_2.9e9_minus_peak_912	chr1	16912753	16913111	-	359	6	5	17	11	6	6	4	2	13	6	9	10
macs2_2.9e9_minus_peak_913	chr1	16917393	16917675	-	283	2	6	5	4	0	4	3	1	13	4	5	1
macs2_2.9e9_minus_peak_914	chr1	16920406	16920731	-	326	28	18	33	33	14	19	12	12	23	26	31	28
macs2_2.9e9_minus_peak_915	chr1	16922126	16922446	-	321	32	29	27	25	16	16	12	23	32	20	32	14
macs2_2.9e9_minus_peak_916	chr1	16922538	16922771	-	234	71	54	56	68	17	40	21	32	38	44	29	47
macs2_2.9e9_minus_peak_917	chr1	16924625	16924882	-	258	13	4	2	11	3	7	2	2	3	2	5	9
macs2_2.9e9_minus_peak_918	chr1	16925966	16926458	-	493	11	21	17	23	8	14	12	5	22	20	17	23
macs2_2.9e9_minus_peak_919	chr1	16931794	16932798	-	1005	218	202	184	192	71	103	91	115	111	136	147	151
macs2_2.9e9_minus_peak_920	chr1	16938368	16938648	-	281	14	4	9	13	13	9	8	5	6	12	4	10
macs2_2.9e9_minus_peak_921	chr1	16944622	16945345	-	724	215	173	214	207	100	161	134	151	182	168	144	168
macs2_2.9e9_minus_peak_922	chr1	16947226	16947489	-	264	17	16	14	24	3	7	8	8	11	15	14	7
macs2_2.9e9_minus_peak_923	chr1	16949342	16949678	-	337	33	20	29	29	11	13	17	19	31	17	17	14
macs2_2.9e9_minus_peak_924	chr1	16955604	16956275	-	672	38	33	43	39	32	24	28	26	36	27	27	23
macs2_2.9e9_minus_peak_925	chr1	16956389	16956638	-	250	4	2	3	3	0	3	6	3	4	0	2	1
macs2_2.9e9_minus_peak_926	chr1	16961392	16961664	-	273	68	95	67	77	36	32	37	42	46	44	44	36
macs2_2.9e9_minus_peak_927	chr1	16962008	16962230	-	223	3	2	2	4	2	3	1	1	0	0	0	0
macs2_2.9e9_minus_peak_928	chr1	16969093	16969588	-	496	6	10	6	11	5	2	6	5	0	3	2	4
macs2_2.9e9_minus_peak_929	chr1	16970956	16971204	-	249	28	30	15	11	15	11	11	12	14	10	7	6
macs2_2.9e9_minus_peak_930	chr1	16980365	16980569	-	205	2	0	2	2	1	0	0	1	0	2	2	0
macs2_2.9e9_minus_peak_931	chr1	16982649	16982986	-	338	0	0	0	0	0	0	1	0	0	1	2	0
macs2_2.9e9_minus_peak_932	chr1	16987047	16987249	-	203	0	0	0	0	0	0	0	0	0	0	0	0
macs2_2.9e9_minus_peak_933	chr1	16988090	16988386	-	297	0	0	0	0	0	0	0	0	0	0	0	0
macs2_2.9e9_minus_peak_934	chr1	16990238	16990482	-	245	0	0	0	0	0	0	0	0	0	0	0	0
macs2_2.9e9_minus_peak_935	chr1	16993133	16993440	-	308	0	0	0	0	0	0	0	0	0	0	0	0
macs2_2.9e9_minus_peak_936	chr1	17004634	17004837	-	204	1	0	3	3	0	0	0	2	3	1	4	0
macs2_2.9e9_minus_peak_937	chr1	17009706	17009986	-	281	2	2	1	4	1	2	2	2	0	4	0	2
macs2_2.9e9_minus_peak_938	chr1	17010987	17012119	-	1133	27	21	22	29	15	20	15	18	49	17	35	27
macs2_2.9e9_minus_peak_939	chr1	17012225	17012629	-	405	3	2	2	2	3	0	0	1	1	4	2	1
macs2_2.9e9_minus_peak_940	chr1	17018168	17018593	-	426	1	3	2	5	2	2	1	0	1	2	1	3
macs2_2.9e9_minus_peak_941	chr1	17061578	17061963	-	386	2	5	1	4	0	1	0	2	0	0	1	1
macs2_2.9e9_minus_peak_942	chr1	17083502	17083714	-	213	15	11	14	11	5	6	6	16	8	5	8	9
macs2_2.9e9_minus_peak_943	chr1	17083817	17084269	-	453	2	0	0	1	0	0	0	0	0	0	0	0
macs2_2.9e9_minus_peak_944	chr1	17184967	17185176	-	210	0	0	0	0	0	0	0	0	0	0	0	0
macs2_2.9e9_minus_peak_945	chr1	17187913	17188112	-	200	0	0	0	0	0	0	0	0	0	0	0	0
macs2_2.9e9_minus_peak_946	chr1	17196098	17196364	-	267	1	6	3	0	0	0	1	2	0	0	0	0
macs2_2.9e9_minus_peak_947	chr1	17215084	17215283	-	200	0	0	0	0	0	0	0	0	0	0	1	1
macs2_2.9e9_minus_peak_948	chr1	17220883	17221323	-	441	20	12	11	15	3	7	6	9	13	6	8	4
macs2_2.9e9_minus_peak_949	chr1	17230417	17230969	-	553	5	5	8	14	5	4	3	3	3	3	13	4
macs2_2.9e9_minus_peak_950	chr1	17266639	17266838	-	200	1	0	0	0	0	0	0	0	0	0	1	1
macs2_2.9e9_minus_peak_951	chr1	17288014	17288375	-	362	1	2	6	4	5	6	1	2	4	0	0	2
macs2_2.9e9_minus_peak_952	chr1	17300862	17301458	-	597	0	0	1	0	0	2	0	0	3	0	0	0
macs2_2.9e9_minus_peak_953	chr1	17312316	17313046	-	731	45	60	54	50	15	29	23	27	36	27	17	23
macs2_2.9e9_minus_peak_954	chr1	17320577	17320838	-	262	2	3	1	5	3	2	3	5	2	10	3	1
macs2_2.9e9_minus_peak_955	chr1	17321856	17322189	-	334	5	4	3	6	4	6	2	6	2	2	4	4
macs2_2.9e9_minus_peak_956	chr1	17329894	17330275	-	382	15	3	7	5	9	2	9	8	16	10	10	6
macs2_2.9e9_minus_peak_957	chr1	17333964	17334165	-	202	2	1	1	0	1	0	0	1	1	0	0	2
macs2_2.9e9_minus_peak_958	chr1	17335821	17336110	-	290	3	0	4	1	3	3	3	2	4	0	3	4
macs2_2.9e9_minus_peak_959	chr1	17345089	17345500	-	412	601	524	450	500	244	313	274	356	483	366	281	366
macs2_2.9e9_minus_peak_960	chr1	17348926	17349205	-	280	83	45	48	40	15	26	26	33	40	29	7	44
macs2_2.9e9_minus_peak_961	chr1	17350313	17350544	-	232	29	7	22	17	4	15	9	11	13	14	0	13
macs2_2.9e9_minus_peak_962	chr1	17351824	17352033	-	210	5	4	6	7	7	2	4	3	9	7	7	7
macs2_2.9e9_minus_peak_963	chr1	17354097	17354301	-	205	24	8	9	5	3	3	4	8	3	15	0	5
macs2_2.9e9_minus_peak_964	chr1	17355518	17356022	-	505	24	17	21	15	17	17	11	25	19	17	13	13
macs2_2.9e9_minus_peak_965	chr1	17357386	17357604	-	219	4	7	5	7	3	2	6	4	3	1	5	1
macs2_2.9e9_minus_peak_966	chr1	17358616	17358832	-	217	8	7	8	9	2	5	10	5	2	0	4	2
macs2_2.9e9_minus_peak_967	chr1	17363701	17363923	-	223	50	41	42	28	19	28	18	21	31	18	25	19
macs2_2.9e9_minus_peak_968	chr1	17364687	17364961	-	275	11	9	16	17	7	5	9	16	13	6	12	14
macs2_2.9e9_minus_peak_969	chr1	17365603	17365807	-	205	15	24	14	13	17	9	8	18	8	10	2	13
macs2_2.9e9_minus_peak_970	chr1	17375086	17375288	-	203	1	6	2	10	1	9	3	5	4	6	2	4
macs2_2.9e9_minus_peak_971	chr1	17375688	17375917	-	230	3	4	8	3	3	8	6	4	4	3	4	4
macs2_2.9e9_minus_peak_972	chr1	17376046	17376267	-	222	12	5	13	4	8	5	5	5	14	8	6	9
macs2_2.9e9_minus_peak_973	chr1	17378237	17378494	-	258	13	14	15	9	7	10	4	10	6	3	6	7
macs2_2.9e9_minus_peak_974	chr1	17393133	17393458	-	326	9	10	2	4	5	7	0	6	9	5	9	5
macs2_2.9e9_minus_peak_975	chr1	17405400	17405710	-	311	1	4	7	1	5	3	1	5	9	2	6	1
macs2_2.9e9_minus_peak_976	chr1	17451853	17452052	-	200	0	1	0	0	2	1	1	1	2	2	0	0
macs2_2.9e9_minus_peak_977	chr1	17453886	17454113	-	228	0	2	0	3	3	2	3	1	1	1	0	3
macs2_2.9e9_minus_peak_978	chr1	17733146	17734340	-	1195	6492	5993	7722	8556	3925	5658	3837	4158	9901	7698	5073	7625
macs2_2.9e9_minus_peak_979	chr1	17735247	17735564	-	318	16	5	18	8	12	9	8	7	26	10	16	10
macs2_2.9e9_minus_peak_980	chr1	17740501	17740752	-	252	13	3	7	15	3	10	8	11	15	11	6	6
macs2_2.9e9_minus_peak_981	chr1	17744651	17744872	-	222	7	14	12	8	4	8	9	3	19	2	12	3
macs2_2.9e9_minus_peak_982	chr1	17745031	17745435	-	405	10	7	14	14	7	8	10	11	13	6	7	11
macs2_2.9e9_minus_peak_983	chr1	17746894	17747121	-	228	6	5	7	8	1	8	3	4	7	5	4	3
macs2_2.9e9_minus_peak_984	chr1	17749706	17750034	-	329	71	93	63	116	52	69	57	66	93	54	72	66
macs2_2.9e9_minus_peak_985	chr1	17753144	17753451	-	308	10	8	16	13	12	13	3	7	11	4	18	11
macs2_2.9e9_minus_peak_986	chr1	17759622	17760115	-	494	7	14	11	21	8	9	10	7	13	6	10	10
macs2_2.9e9_minus_peak_987	chr1	17763291	17763491	-	201	5	3	9	6	2	3	2	9	5	3	6	2
macs2_2.9e9_minus_peak_988	chr1	17765693	17766216	-	524	137	284	156	307	145	175	142	149	204	135	175	175
macs2_2.9e9_minus_peak_989	chr1	18388963	18389169	-	207	0	3	0	0	0	0	0	2	0	1	0	0
macs2_2.9e9_minus_peak_990	chr1	19197785	19198119	-	335	138	129	104	135	69	96	54	96	174	214	184	149
macs2_2.9e9_minus_peak_991	chr1	19208958	19209278	-	321	3	3	2	11	2	4	1	7	4	2	0	1
macs2_2.9e9_minus_peak_992	chr1	19209473	19209784	-	312	1	3	2	4	1	0	0	4	0	0	0	1
macs2_2.9e9_minus_peak_993	chr1	19221215	19221710	-	496	5	7	4	1	5	2	1	1	15	17	13	9
macs2_2.9e9_minus_peak_994	chr1	19230642	19231121	-	480	41	41	54	39	16	40	14	14	62	36	28	31
macs2_2.9e9_minus_peak_995	chr1	19234220	19234493	-	274	6	3	6	5	5	4	3	3	8	4	4	6
macs2_2.9e9_minus_peak_996	chr1	19244735	19244941	-	207	0	3	3	0	1	0	1	1	4	3	1	0
macs2_2.9e9_minus_peak_997	chr1	19245991	19246200	-	210	4	1	1	6	3	3	4	2	4	6	7	0
macs2_2.9e9_minus_peak_998	chr1	19247414	19247613	-	200	0	0	5	4	1	1	2	0	0	2	3	0
macs2_2.9e9_minus_peak_999	chr1	19251507	19251706	-	200	1	0	0	1	2	2	0	1	2	1	1	1
macs2_2.9e9_minus_peak_1000	chr1	19260905	19261115	-	211	2	1	0	3	2	3	1	3	3	1	2	6
macs2_2.9e9_minus_peak_1001	chr1	19262073	19262549	-	477	6	6	9	9	2	10	3	6	12	7	6	9
macs2_2.9e9_minus_peak_1002	chr1	19269240	19269549	-	310	8	1	4	3	7	11	5	6	12	7	6	11
macs2_2.9e9_minus_peak_1003	chr1	19272808	19273144	-	337	6	6	5	3	1	3	4	7	10	6	11	8
macs2_2.9e9_minus_peak_1004	chr1	19313011	19313221	-	211	0	0	0	0	1	0	1	0	3	3	0	0
macs2_2.9e9_minus_peak_1005	chr1	19400869	19401333	-	465	708	728	397	475	293	481	288	382	857	678	821	708
macs2_2.9e9_minus_peak_1006	chr1	19408521	19408727	-	207	3	4	1	5	2	3	4	7	1	1	3	0
macs2_2.9e9_minus_peak_1007	chr1	19409940	19410151	-	212	6	6	3	4	2	3	1	4	3	2	6	5
macs2_2.9e9_minus_peak_1008	chr1	19410286	19410681	-	396	11	13	4	11	5	2	2	3	8	7	5	8
macs2_2.9e9_minus_peak_1009	chr1	19416578	19416964	-	387	1	2	8	6	0	0	5	0	3	0	3	5
macs2_2.9e9_minus_peak_1010	chr1	19423373	19423776	-	404	255	336	182	265	189	209	195	204	479	323	612	345
macs2_2.9e9_minus_peak_1011	chr1	19425910	19426151	-	242	116	103	57	81	64	49	64	56	114	114	158	120
macs2_2.9e9_minus_peak_1012	chr1	19426689	19426976	-	288	61	76	29	46	34	27	28	33	51	55	83	72
macs2_2.9e9_minus_peak_1013	chr1	19438001	19438275	-	275	12	4	6	3	2	4	1	3	0	4	4	3
macs2_2.9e9_minus_peak_1014	chr1	19438802	19439065	-	264	4	0	0	2	3	1	3	0	0	2	0	3
macs2_2.9e9_minus_peak_1015	chr1	19444822	19445205	-	384	24	22	19	17	9	4	14	13	19	7	14	11
macs2_2.9e9_minus_peak_1016	chr1	19447575	19447951	-	377	264	185	167	174	119	132	137	124	312	248	403	239
macs2_2.9e9_minus_peak_1017	chr1	19448242	19448477	-	236	15	9	14	18	8	9	11	14	15	31	24	16
macs2_2.9e9_minus_peak_1018	chr1	19449182	19449461	-	280	21	25	14	15	11	13	8	12	12	34	17	28
macs2_2.9e9_minus_peak_1019	chr1	19450598	19450859	-	262	19	28	17	10	7	9	9	8	9	10	9	13
macs2_2.9e9_minus_peak_1020	chr1	19452753	19453095	-	343	13	11	11	11	4	8	9	15	19	18	16	6
macs2_2.9e9_minus_peak_1021	chr1	19461096	19461343	-	248	7	9	5	8	1	3	2	1	0	6	2	4
macs2_2.9e9_minus_peak_1022	chr1	19461465	19461749	-	285	3	6	4	5	2	3	1	1	6	3	4	2
macs2_2.9e9_minus_peak_1023	chr1	19464413	19464654	-	242	25	20	14	8	5	9	13	5	25	19	21	18
macs2_2.9e9_minus_peak_1024	chr1	19465395	19465633	-	239	20	15	10	5	3	6	10	3	14	11	9	11
macs2_2.9e9_minus_peak_1025	chr1	19466615	19466864	-	250	8	1	5	12	4	3	3	3	4	3	3	3
macs2_2.9e9_minus_peak_1026	chr1	19470068	19470434	-	367	6	4	8	4	2	6	3	4	5	1	1	2
macs2_2.9e9_minus_peak_1027	chr1	19471089	19471365	-	277	3	3	1	1	2	1	2	3	3	2	0	0
macs2_2.9e9_minus_peak_1028	chr1	19476921	19477170	-	250	3	1	0	2	0	2	2	2	2	0	3	3
macs2_2.9e9_minus_peak_1029	chr1	19477325	19477526	-	202	1	0	2	2	2	2	1	0	0	0	1	0
macs2_2.9e9_minus_peak_1030	chr1	19483030	19483274	-	245	4	2	2	10	2	7	6	2	12	3	6	7
macs2_2.9e9_minus_peak_1031	chr1	19486027	19486335	-	309	2	7	6	4	1	3	1	2	0	2	5	3
macs2_2.9e9_minus_peak_1032	chr1	19488761	19488961	-	201	5	3	1	4	2	3	1	2	2	2	4	3
macs2_2.9e9_minus_peak_1033	chr1	19490181	19490381	-	201	4	3	6	2	1	1	2	5	1	0	1	2
macs2_2.9e9_minus_peak_1034	chr1	19493797	19494053	-	257	3	2	4	7	0	2	3	3	3	2	3	1
macs2_2.9e9_minus_peak_1035	chr1	19500904	19501283	-	380	7	4	1	3	0	0	1	2	4	0	2	2
macs2_2.9e9_minus_peak_1036	chr1	19506576	19506936	-	361	13	5	10	6	7	7	3	4	4	5	12	2
macs2_2.9e9_minus_peak_1037	chr1	19507109	19507362	-	254	7	7	3	10	3	5	5	1	9	6	5	2
macs2_2.9e9_minus_peak_1038	chr1	19508069	19508392	-	324	12	9	13	12	3	8	6	3	7	12	8	7
macs2_2.9e9_minus_peak_1039	chr1	19508745	19508985	-	241	14	10	8	21	8	9	6	5	8	4	5	7
macs2_2.9e9_minus_peak_1040	chr1	19509710	19509937	-	228	61	43	38	31	23	9	20	19	28	22	32	19
macs2_2.9e9_minus_peak_1041	chr1	19513124	19513402	-	279	9	13	7	7	9	4	3	14	8	5	7	1
macs2_2.9e9_minus_peak_1042	chr1	19517291	19517551	-	261	2	4	5	3	5	1	2	4	1	2	2	2
macs2_2.9e9_minus_peak_1043	chr1	19519158	19519459	-	302	5	10	4	7	4	5	3	4	5	4	9	3
macs2_2.9e9_minus_peak_1044	chr1	19531999	19532467	-	469	34	22	18	26	12	6	7	17	14	11	23	18
macs2_2.9e9_minus_peak_1045	chr1	19532717	19532935	-	219	10	9	10	4	7	5	4	4	7	2	9	9
macs2_2.9e9_minus_peak_1046	chr1	19535887	19536129	-	243	8	3	4	3	2	3	5	2	2	2	2	1
macs2_2.9e9_minus_peak_1047	chr1	19540946	19541215	-	270	35	43	19	29	9	18	12	27	30	24	25	19
macs2_2.9e9_minus_peak_1048	chr1	19542054	19542336	-	283	63	77	66	125	40	54	54	51	88	33	84	68
macs2_2.9e9_minus_peak_1049	chr1	19543271	19543503	-	233	21	11	16	15	12	19	10	10	23	16	22	18
macs2_2.9e9_minus_peak_1050	chr1	19544495	19544884	-	390	110	100	86	112	49	81	43	54	71	73	80	81
macs2_2.9e9_minus_peak_1051	chr1	19545321	19545805	-	485	273	255	208	221	112	173	151	172	120	112	90	138
macs2_2.9e9_minus_peak_1052	chr1	19553094	19553343	-	250	8	3	4	7	4	4	6	5	9	6	8	4
macs2_2.9e9_minus_peak_1053	chr1	19561443	19561649	-	207	1	0	0	1	0	3	0	1	0	4	0	1
macs2_2.9e9_minus_peak_1054	chr1	19568257	19568684	-	428	11	4	7	4	1	3	3	2	2	2	3	3
macs2_2.9e9_minus_peak_1055	chr1	19569673	19569919	-	247	10	4	3	4	2	0	7	1	0	0	2	0
macs2_2.9e9_minus_peak_1056	chr1	19574582	19574781	-	200	3	0	3	3	2	1	3	3	1	1	5	1
macs2_2.9e9_minus_peak_1057	chr1	19591080	19591282	-	203	0	1	2	3	0	1	0	2	2	0	1	1
macs2_2.9e9_minus_peak_1058	chr1	19592370	19592631	-	262	12	15	7	1	1	0	3	3	3	2	3	4
macs2_2.9e9_minus_peak_1059	chr1	19605070	19605272	-	203	7	5	0	1	1	0	1	1	0	1	1	2
macs2_2.9e9_minus_peak_1060	chr1	19606562	19606808	-	247	7	1	0	2	1	0	4	0	4	4	5	2
macs2_2.9e9_minus_peak_1061	chr1	19608972	19609216	-	245	6	3	1	2	1	2	1	0	2	1	0	5
macs2_2.9e9_minus_peak_1062	chr1	19619625	19620020	-	396	137	183	79	76	31	57	35	49	140	114	98	112
macs2_2.9e9_minus_peak_1063	chr1	19622619	19622888	-	270	31	28	14	17	10	11	11	6	33	24	29	15
macs2_2.9e9_minus_peak_1064	chr1	19627306	19627649	-	344	57	30	39	35	21	26	18	16	45	45	46	30
macs2_2.9e9_minus_peak_1065	chr1	19628089	19628346	-	258	68	44	24	30	24	13	12	20	43	40	45	40
macs2_2.9e9_minus_peak_1066	chr1	19629077	19629294	-	218	19	23	12	9	15	14	6	17	19	22	32	21
macs2_2.9e9_minus_peak_1067	chr1	19630341	19630798	-	458	601	383	812	726	333	485	393	459	694	554	602	577
macs2_2.9e9_minus_peak_1068	chr1	19631408	19631762	-	355	8	16	9	15	6	6	7	3	12	4	12	12
macs2_2.9e9_minus_peak_1069	chr1	19637442	19637762	-	321	4	5	1	4	2	1	1	3	1	1	3	1
macs2_2.9e9_minus_peak_1070	chr1	19654145	19654344	-	200	0	1	0	1	1	0	2	0	1	1	1	3
macs2_2.9e9_minus_peak_1071	chr1	19665140	19666017	-	878	2448	2146	1767	2051	880	1114	955	1124	881	873	708	963
macs2_2.9e9_minus_peak_1072	chr1	19670669	19670911	-	243	4	9	5	10	4	3	6	6	4	4	1	7
macs2_2.9e9_minus_peak_1073	chr1	19673269	19673576	-	308	4	3	1	3	4	1	3	2	6	9	3	5
macs2_2.9e9_minus_peak_1074	chr1	19674671	19674979	-	309	76	48	56	52	29	19	35	21	71	34	60	48
macs2_2.9e9_minus_peak_1075	chr1	19677017	19677276	-	260	10	7	5	6	3	2	7	5	10	12	12	9
macs2_2.9e9_minus_peak_1076	chr1	19677665	19677950	-	286	29	30	26	23	9	9	12	18	27	29	24	19
macs2_2.9e9_minus_peak_1077	chr1	19682957	19683215	-	259	19	10	11	11	6	5	8	5	2	2	5	6
macs2_2.9e9_minus_peak_1078	chr1	19683810	19684012	-	203	11	5	4	1	2	3	3	1	2	3	0	2
macs2_2.9e9_minus_peak_1079	chr1	19685598	19686096	-	499	152	109	94	125	57	81	69	81	130	100	91	112
macs2_2.9e9_minus_peak_1080	chr1	19691207	19691519	-	313	8	8	4	9	5	10	2	8	8	8	12	5
macs2_2.9e9_minus_peak_1081	chr1	19695067	19695328	-	262	5	7	5	1	1	1	3	4	4	1	6	3
macs2_2.9e9_minus_peak_1082	chr1	19700059	19700937	-	879	29	28	23	29	16	31	13	31	75	51	65	57
macs2_2.9e9_minus_peak_1083	chr1	19717444	19717873	-	430	4	7	2	3	2	1	4	2	1	4	2	1
macs2_2.9e9_minus_peak_1084	chr1	19736159	19736367	-	209	4	2	0	1	1	0	0	0	1	4	4	2
macs2_2.9e9_minus_peak_1085	chr1	19738835	19739255	-	421	6	6	5	5	0	5	3	7	8	4	1	6
macs2_2.9e9_minus_peak_1086	chr1	19745126	19745326	-	201	2	2	2	2	0	1	0	1	1	0	1	2
macs2_2.9e9_minus_peak_1087	chr1	19749922	19750176	-	255	7	5	3	6	0	3	5	3	7	5	6	4
macs2_2.9e9_minus_peak_1088	chr1	19755001	19755387	-	387	1	4	0	2	2	0	1	4	10	2	0	3
macs2_2.9e9_minus_peak_1089	chr1	19758877	19759303	-	427	9	8	12	9	2	4	1	4	20	15	16	12
macs2_2.9e9_minus_peak_1090	chr1	19760968	19761169	-	202	3	2	1	3	0	0	0	1	2	1	4	2
macs2_2.9e9_minus_peak_1091	chr1	19766245	19767006	-	762	22	22	13	15	11	13	4	15	31	20	28	23
macs2_2.9e9_minus_peak_1092	chr1	19771763	19772045	-	283	5	10	11	8	5	10	8	5	9	9	13	12
macs2_2.9e9_minus_peak_1093	chr1	19773663	19773882	-	220	9	7	9	12	2	6	3	7	16	10	11	9
macs2_2.9e9_minus_peak_1094	chr1	19779155	19779463	-	309	2	4	3	3	2	3	2	6	11	10	10	8
macs2_2.9e9_minus_peak_1095	chr1	19779612	19779868	-	257	5	3	0	2	0	0	1	1	5	4	0	0
macs2_2.9e9_minus_peak_1096	chr1	19786956	19787331	-	376	11	10	2	9	6	7	5	7	7	13	15	5
macs2_2.9e9_minus_peak_1097	chr1	19790544	19790765	-	222	22	12	23	21	14	17	6	16	35	26	30	20
macs2_2.9e9_minus_peak_1098	chr1	19794671	19794902	-	232	5	3	3	4	0	3	7	2	4	5	1	8
macs2_2.9e9_minus_peak_1099	chr1	19800191	19800610	-	420	7	6	4	9	3	3	3	1	5	7	8	5
macs2_2.9e9_minus_peak_1100	chr1	19800847	19801070	-	224	4	1	1	2	2	4	0	0	2	1	2	2
macs2_2.9e9_minus_peak_1101	chr1	19805572	19805771	-	200	1	0	5	2	0	0	0	2	2	3	0	1
macs2_2.9e9_minus_peak_1102	chr1	19949336	19949539	-	204	0	0	0	0	1	0	0	0	0	0	2	0
macs2_2.9e9_minus_peak_1103	chr1	19988963	19989310	-	348	1	2	1	3	5	3	0	2	8	2	2	3
macs2_2.9e9_minus_peak_1104	chr1	19990094	19990293	-	200	1	1	0	0	0	0	0	0	1	0	2	1
macs2_2.9e9_minus_peak_1105	chr1	20008592	20008928	-	337	12	15	9	11	7	4	5	7	14	9	11	7
macs2_2.9e9_minus_peak_1106	chr1	20010481	20010745	-	265	7	7	4	3	1	5	1	1	8	4	6	7
macs2_2.9e9_minus_peak_1107	chr1	20017265	20017475	-	211	1	3	0	2	0	3	0	0	2	2	0	4
macs2_2.9e9_minus_peak_1108	chr1	20042753	20043135	-	383	0	1	0	1	0	1	0	1	4	2	6	0
macs2_2.9e9_minus_peak_1109	chr1	20046439	20046709	-	271	4	1	1	1	0	0	0	0	1	2	1	0
macs2_2.9e9_minus_peak_1110	chr1	20059282	20059487	-	206	0	2	1	5	1	1	2	0	2	5	1	2
macs2_2.9e9_minus_peak_1111	chr1	20059668	20059915	-	248	0	4	0	3	1	1	2	2	2	3	3	2
macs2_2.9e9_minus_peak_1112	chr1	20069683	20070105	-	423	5	4	5	4	2	9	1	8	11	5	1	6
macs2_2.9e9_minus_peak_1113	chr1	20076445	20076710	-	266	3	6	3	5	2	3	1	5	3	2	5	9
macs2_2.9e9_minus_peak_1114	chr1	20078553	20078777	-	225	8	2	1	1	0	3	0	0	1	0	2	0
macs2_2.9e9_minus_peak_1115	chr1	20081980	20082236	-	257	10	6	6	5	4	1	5	6	10	8	8	6
macs2_2.9e9_minus_peak_1116	chr1	20086590	20087159	-	570	4	8	8	7	3	3	7	5	10	4	2	7
macs2_2.9e9_minus_peak_1117	chr1	20089522	20089721	-	200	0	1	1	1	1	0	4	1	2	0	3	3
macs2_2.9e9_minus_peak_1118	chr1	20097665	20097864	-	200	1	0	0	0	1	0	2	0	2	1	0	3
macs2_2.9e9_minus_peak_1119	chr1	20098035	20098238	-	204	3	3	0	2	0	1	2	1	2	0	1	1
macs2_2.9e9_minus_peak_1120	chr1	20104590	20104817	-	228	0	3	1	1	2	3	0	1	2	0	1	0
macs2_2.9e9_minus_peak_1121	chr1	20107991	20108190	-	200	0	1	0	0	0	1	1	0	0	0	2	1
macs2_2.9e9_minus_peak_1122	chr1	20111741	20111969	-	229	1	1	0	3	2	1	0	0	3	2	2	3
macs2_2.9e9_minus_peak_1123	chr1	20119163	20119389	-	227	1	1	0	4	1	4	0	0	3	1	7	2
macs2_2.9e9_minus_peak_1124	chr1	20292318	20292547	-	230	7	6	5	1	4	1	4	2	5	13	6	4
macs2_2.9e9_minus_peak_1125	chr1	20477894	20478111	-	218	1	2	1	1	0	1	0	0	2	1	1	1
macs2_2.9e9_minus_peak_1126	chr1	20808759	20809281	-	523	132	117	102	92	52	71	52	89	99	75	60	66
macs2_2.9e9_minus_peak_1127	chr1	20809389	20810191	-	803	203	177	143	152	59	104	98	114	182	196	90	131
macs2_2.9e9_minus_peak_1128	chr1	20825805	20826291	-	487	87	76	62	73	37	58	41	56	64	70	87	55
macs2_2.9e9_minus_peak_1129	chr1	20832456	20832776	-	321	1	1	4	1	0	1	4	0	1	0	4	2
macs2_2.9e9_minus_peak_1130	chr1	20877576	20877775	-	200	3	2	0	1	0	0	1	1	0	3	0	0
macs2_2.9e9_minus_peak_1131	chr1	20972226	20972470	-	245	8	6	1	7	3	6	1	4	4	10	4	6
macs2_2.9e9_minus_peak_1132	chr1	20973294	20973663	-	370	4	8	8	11	5	2	3	7	11	6	8	10
macs2_2.9e9_minus_peak_1133	chr1	20974224	20974431	-	208	7	12	3	8	5	8	7	10	17	21	11	17
macs2_2.9e9_minus_peak_1134	chr1	20975737	20975962	-	226	10	11	21	10	11	13	5	4	20	17	18	24
macs2_2.9e9_minus_peak_1135	chr1	20978165	20978987	-	823	780	828	965	1321	492	745	612	780	950	788	585	900
macs2_2.9e9_minus_peak_1136	chr1	20981577	20981831	-	255	26	17	18	13	7	9	13	7	12	15	14	12
macs2_2.9e9_minus_peak_1137	chr1	20985253	20986008	-	756	48	34	64	48	27	29	38	26	41	28	18	39
macs2_2.9e9_minus_peak_1138	chr1	20990382	20990854	-	473	59	34	27	19	18	20	13	12	55	47	46	31
macs2_2.9e9_minus_peak_1139	chr1	20991677	20991992	-	316	11	11	1	7	3	8	4	6	3	5	11	2
macs2_2.9e9_minus_peak_1140	chr1	20997904	20998335	-	432	6	8	18	12	6	16	6	8	9	5	9	8
macs2_2.9e9_minus_peak_1141	chr1	21004414	21004726	-	313	2	6	9	4	1	6	1	4	4	4	2	9
macs2_2.9e9_minus_peak_1142	chr1	21014442	21014790	-	349	1	4	5	7	2	1	2	2	6	1	6	8
macs2_2.9e9_minus_peak_1143	chr1	21017908	21018194	-	287	2	2	2	3	0	1	3	2	3	1	2	4
macs2_2.9e9_minus_peak_1144	chr1	21018766	21019033	-	268	10	4	9	7	6	1	8	6	12	10	4	7
macs2_2.9e9_minus_peak_1145	chr1	21019634	21019857	-	224	3	14	5	10	5	3	3	5	16	15	17	14
macs2_2.9e9_minus_peak_1146	chr1	21025013	21025214	-	202	3	3	5	3	0	3	3	4	8	7	1	7
macs2_2.9e9_minus_peak_1147	chr1	21027025	21027293	-	269	9	6	5	11	4	8	11	6	10	4	8	8
macs2_2.9e9_minus_peak_1148	chr1	21032263	21032558	-	296	8	14	7	17	12	8	5	13	21	5	19	9
macs2_2.9e9_minus_peak_1149	chr1	21032911	21033117	-	207	3	4	3	1	0	5	1	2	7	4	5	2
macs2_2.9e9_minus_peak_1150	chr1	21033455	21033822	-	368	10	10	16	19	8	7	10	11	17	14	16	13
macs2_2.9e9_minus_peak_1151	chr1	21035733	21036013	-	281	3	4	2	2	0	2	2	4	4	5	3	5
macs2_2.9e9_minus_peak_1152	chr1	21046086	21046556	-	471	66	49	49	59	34	39	36	36	63	66	66	59
macs2_2.9e9_minus_peak_1153	chr1	21046854	21047218	-	365	6	0	1	5	4	1	1	0	4	1	5	3
macs2_2.9e9_minus_peak_1154	chr1	21069055	21069947	-	893	1160	1042	742	764	460	640	508	638	838	713	499	583
macs2_2.9e9_minus_peak_1155	chr1	21070062	21070269	-	208	21	15	28	16	7	15	10	12	20	21	2	17
macs2_2.9e9_minus_peak_1156	chr1	21071042	21071344	-	303	37	21	20	27	13	32	16	28	30	28	15	14
macs2_2.9e9_minus_peak_1157	chr1	21075701	21075977	-	277	20	29	19	25	10	9	13	9	19	6	17	15
macs2_2.9e9_minus_peak_1158	chr1	21077236	21077459	-	224	18	18	26	20	7	9	16	10	13	12	13	15
macs2_2.9e9_minus_peak_1159	chr1	21080435	21081242	-	808	115	97	92	96	46	72	51	71	71	45	52	61
macs2_2.9e9_minus_peak_1160	chr1	21085057	21085440	-	384	29	20	23	22	15	11	9	24	17	15	16	9
macs2_2.9e9_minus_peak_1161	chr1	21087272	21087503	-	232	8	4	12	10	1	4	2	3	0	2	5	5
macs2_2.9e9_minus_peak_1162	chr1	21090498	21090845	-	348	9	5	5	9	5	1	8	1	9	5	4	6
macs2_2.9e9_minus_peak_1163	chr1	21097342	21097685	-	344	14	8	13	11	16	12	17	13	11	12	12	9
macs2_2.9e9_minus_peak_1164	chr1	21100078	21100319	-	242	10	18	11	17	14	10	11	11	26	13	15	17
macs2_2.9e9_minus_peak_1165	chr1	21101692	21102308	-	617	524	429	277	297	222	203	238	216	330	251	127	225
macs2_2.9e9_minus_peak_1166	chr1	21102965	21103212	-	248	35	63	37	46	26	35	19	24	45	18	41	32
macs2_2.9e9_minus_peak_1167	chr1	21105170	21105444	-	275	25	19	24	31	9	11	7	14	6	6	7	6
macs2_2.9e9_minus_peak_1168	chr1	21106156	21106373	-	218	34	42	25	17	15	23	18	24	19	16	22	17
macs2_2.9e9_minus_peak_1169	chr1	21110504	21110789	-	286	6	10	18	13	13	15	18	14	18	9	5	6
macs2_2.9e9_minus_peak_1170	chr1	21112412	21112702	-	291	6	5	7	1	4	7	3	3	2	0	4	3
macs2_2.9e9_minus_peak_1171	chr1	21118530	21118769	-	240	2	3	13	4	6	3	2	3	1	8	6	7
macs2_2.9e9_minus_peak_1172	chr1	21132888	21133959	-	1072	264	227	184	195	105	147	89	105	108	79	61	51
macs2_2.9e9_minus_peak_1173	chr1	21136428	21136629	-	202	21	8	11	15	10	7	4	2	1	5	7	4
macs2_2.9e9_minus_peak_1174	chr1	21144067	21144280	-	214	9	11	8	11	5	8	6	8	11	3	7	8
macs2_2.9e9_minus_peak_1175	chr1	21145762	21146084	-	323	7	14	5	10	2	2	4	1	3	5	2	5
macs2_2.9e9_minus_peak_1176	chr1	21148811	21149182	-	372	7	14	5	11	5	5	1	3	5	7	4	6
macs2_2.9e9_minus_peak_1177	chr1	21149787	21150013	-	227	14	13	7	11	5	5	0	8	3	1	2	7
macs2_2.9e9_minus_peak_1178	chr1	21151325	21151583	-	259	20	20	10	14	1	10	4	10	12	10	7	11
macs2_2.9e9_minus_peak_1179	chr1	21154451	21154663	-	213	10	5	13	10	5	1	2	8	10	5	3	3
macs2_2.9e9_minus_peak_1180	chr1	21157702	21158233	-	532	38	41	30	21	4	16	15	10	14	21	16	8
macs2_2.9e9_minus_peak_1181	chr1	21163625	21163824	-	200	1	4	0	0	4	2	1	0	2	0	0	3
macs2_2.9e9_minus_peak_1182	chr1	21169228	21169521	-	294	20	18	14	24	5	10	1	7	5	12	4	11
macs2_2.9e9_minus_peak_1183	chr1	21170863	21171144	-	282	9	11	8	5	6	9	3	3	8	0	6	5
macs2_2.9e9_minus_peak_1184	chr1	21174046	21174247	-	202	3	5	5	7	3	3	4	2	1	3	1	0
macs2_2.9e9_minus_peak_1185	chr1	21177559	21177899	-	341	20	26	19	28	6	15	5	10	3	5	12	4
macs2_2.9e9_minus_peak_1186	chr1	21186371	21186615	-	245	9	6	7	17	7	9	4	5	5	5	12	5
macs2_2.9e9_minus_peak_1187	chr1	21186709	21187006	-	298	56	68	57	67	31	39	23	33	40	17	32	14
macs2_2.9e9_minus_peak_1188	chr1	21188546	21188803	-	258	49	58	35	55	14	31	13	16	23	16	20	11
macs2_2.9e9_minus_peak_1189	chr1	21189839	21190041	-	203	11	15	6	14	4	8	7	5	6	3	3	2
macs2_2.9e9_minus_peak_1190	chr1	21190817	21191119	-	303	39	36	26	41	19	22	9	21	18	11	22	10
macs2_2.9e9_minus_peak_1191	chr1	21194486	21194849	-	364	40	44	25	39	20	17	7	21	13	14	18	11
macs2_2.9e9_minus_peak_1192	chr1	21195689	21195959	-	271	24	40	23	28	11	19	8	18	6	14	9	17
macs2_2.9e9_minus_peak_1193	chr1	21196666	21196913	-	248	16	7	2	7	4	3	6	4	0	6	5	1
macs2_2.9e9_minus_peak_1194	chr1	21199106	21199329	-	224	12	15	16	11	3	7	2	4	11	5	6	4
macs2_2.9e9_minus_peak_1195	chr1	21200844	21201138	-	295	15	6	7	6	5	3	2	1	4	4	4	2
macs2_2.9e9_minus_peak_1196	chr1	21204782	21205155	-	374	16	16	5	11	11	9	8	10	2	7	3	5
macs2_2.9e9_minus_peak_1197	chr1	21205676	21205909	-	234	9	6	7	4	5	4	1	4	5	3	6	5
macs2_2.9e9_minus_peak_1198	chr1	21212657	21212858	-	202	7	3	4	7	2	2	4	3	4	4	5	0
macs2_2.9e9_minus_peak_1199	chr1	21213598	21214008	-	411	52	61	53	61	28	41	35	28	22	36	32	17
macs2_2.9e9_minus_peak_1200	chr1	21215890	21216099	-	210	6	8	8	14	8	8	6	8	8	5	3	8
macs2_2.9e9_minus_peak_1201	chr1	21219469	21220072	-	604	22	51	38	37	19	17	25	18	22	14	15	21
macs2_2.9e9_minus_peak_1202	chr1	21224482	21224735	-	254	21	12	6	14	10	14	10	7	0	1	6	7
macs2_2.9e9_minus_peak_1203	chr1	21225138	21225412	-	275	6	14	4	19	5	8	4	5	6	0	1	4
macs2_2.9e9_minus_peak_1204	chr1	21226189	21226425	-	237	42	34	25	45	18	38	17	27	21	16	8	11
macs2_2.9e9_minus_peak_1205	chr1	21231191	21231431	-	241	42	29	16	34	17	30	16	19	9	12	8	7
macs2_2.9e9_minus_peak_1206	chr1	21232850	21233069	-	220	4	5	1	6	4	2	2	2	2	2	1	2
macs2_2.9e9_minus_peak_1207	chr1	21236133	21236429	-	297	32	41	23	35	19	33	14	24	27	24	27	33
macs2_2.9e9_minus_peak_1208	chr1	21238183	21238382	-	200	4	2	0	7	3	7	6	1	4	4	5	1
macs2_2.9e9_minus_peak_1209	chr1	21240532	21240744	-	213	5	3	7	5	3	2	8	5	6	3	6	4
macs2_2.9e9_minus_peak_1210	chr1	21244408	21244787	-	380	17	54	13	27	8	10	13	10	20	26	20	12
macs2_2.9e9_minus_peak_1211	chr1	21245106	21245814	-	709	75	80	47	65	32	37	32	32	64	57	43	34
macs2_2.9e9_minus_peak_1212	chr1	21250965	21251210	-	246	20	20	18	13	17	8	6	14	29	22	28	11
macs2_2.9e9_minus_peak_1213	chr1	21253430	21253662	-	233	21	13	10	9	7	9	9	13	26	23	23	7
macs2_2.9e9_minus_peak_1214	chr1	21254352	21254656	-	305	10	3	8	8	4	10	4	3	5	7	10	8
macs2_2.9e9_minus_peak_1215	chr1	21255576	21255905	-	330	12	15	17	26	14	18	9	15	16	13	16	19
macs2_2.9e9_minus_peak_1216	chr1	21264252	21264594	-	343	9	7	10	17	10	13	4	3	12	18	19	9
macs2_2.9e9_minus_peak_1217	chr1	21266133	21266452	-	320	15	19	17	17	5	7	9	5	12	16	9	8
macs2_2.9e9_minus_peak_1218	chr1	21267649	21268158	-	510	57	62	44	65	28	48	27	46	32	27	35	38
macs2_2.9e9_minus_peak_1219	chr1	21269828	21270140	-	313	32	26	58	43	20	23	30	38	21	10	5	13
macs2_2.9e9_minus_peak_1220	chr1	21276015	21276555	-	541	43	32	23	28	11	8	8	16	13	17	13	13
macs2_2.9e9_minus_peak_1221	chr1	21277432	21277893	-	462	10	13	23	10	9	13	8	7	12	8	2	13
macs2_2.9e9_minus_peak_1222	chr1	21281637	21281974	-	338	13	13	10	20	4	8	7	9	13	17	16	7
macs2_2.9e9_minus_peak_1223	chr1	21287216	21287505	-	290	5	3	3	4	3	6	9	4	32	46	41	24
macs2_2.9e9_minus_peak_1224	chr1	21289296	21289548	-	253	28	25	16	24	15	17	15	15	31	10	35	19
macs2_2.9e9_minus_peak_1225	chr1	21291535	21291754	-	220	8	12	5	6	7	6	0	3	6	6	10	3
macs2_2.9e9_minus_peak_1226	chr1	21297809	21298130	-	322	14	9	12	19	3	5	2	5	4	10	9	3
macs2_2.9e9_minus_peak_1227	chr1	21299368	21299583	-	216	37	40	41	45	31	40	27	26	37	29	37	31
macs2_2.9e9_minus_peak_1228	chr1	21303602	21303829	-	228	15	8	18	11	5	8	4	9	11	5	13	1
macs2_2.9e9_minus_peak_1229	chr1	21306642	21306910	-	269	29	15	21	28	12	17	8	13	18	14	19	14
macs2_2.9e9_minus_peak_1230	chr1	21307370	21307897	-	528	23	19	23	14	15	7	10	10	10	9	13	12
macs2_2.9e9_minus_peak_1231	chr1	21312134	21312763	-	630	21	10	12	12	3	6	7	3	5	4	6	1
macs2_2.9e9_minus_peak_1232	chr1	21313941	21314187	-	247	9	3	1	4	1	1	3	0	4	4	6	1
macs2_2.9e9_minus_peak_1233	chr1	21320996	21321446	-	451	39	58	32	34	13	19	11	18	20	22	31	22
macs2_2.9e9_minus_peak_1234	chr1	21322707	21322929	-	223	19	11	9	3	3	6	9	3	3	8	6	4
macs2_2.9e9_minus_peak_1235	chr1	21326230	21326566	-	337	55	69	33	60	30	27	16	29	41	31	53	33
macs2_2.9e9_minus_peak_1236	chr1	21327878	21328123	-	246	7	12	6	8	5	5	4	4	9	7	8	4
macs2_2.9e9_minus_peak_1237	chr1	21329400	21329931	-	532	63	43	36	49	17	30	16	21	34	29	29	21
macs2_2.9e9_minus_peak_1238	chr1	21331196	21331510	-	315	45	30	22	33	13	16	8	25	38	37	32	28
macs2_2.9e9_minus_peak_1239	chr1	21334725	21334932	-	208	23	16	14	12	8	10	7	3	18	15	19	13
macs2_2.9e9_minus_peak_1240	chr1	21335560	21335904	-	345	36	28	23	30	12	15	5	8	35	20	19	24
macs2_2.9e9_minus_peak_1241	chr1	21340757	21340964	-	208	3	3	4	2	1	3	1	2	3	0	6	3
macs2_2.9e9_minus_peak_1242	chr1	21343313	21343586	-	274	9	7	9	13	1	4	3	6	7	7	8	7
macs2_2.9e9_minus_peak_1243	chr1	21346223	21346678	-	456	25	17	17	17	5	15	6	12	12	18	9	9
macs2_2.9e9_minus_peak_1244	chr1	21347919	21348153	-	235	8	7	3	6	5	5	3	3	7	4	8	4
macs2_2.9e9_minus_peak_1245	chr1	21349486	21349710	-	225	7	7	1	7	1	5	3	4	5	5	12	5
macs2_2.9e9_minus_peak_1246	chr1	21357508	21357799	-	292	4	3	4	2	2	2	0	1	4	3	1	4
macs2_2.9e9_minus_peak_1247	chr1	21365022	21365490	-	469	31	29	23	23	10	18	8	14	21	23	19	18
macs2_2.9e9_minus_peak_1248	chr1	21367363	21367901	-	539	84	66	38	88	31	41	23	45	71	48	50	31
macs2_2.9e9_minus_peak_1249	chr1	21368384	21368705	-	322	14	16	19	27	8	12	7	14	14	19	18	16
macs2_2.9e9_minus_peak_1250	chr1	21384934	21385463	-	530	41	41	25	41	23	22	13	18	74	58	59	69
macs2_2.9e9_minus_peak_1251	chr1	21387707	21388005	-	299	9	8	6	4	2	4	6	2	6	20	14	8
macs2_2.9e9_minus_peak_1252	chr1	21388149	21388363	-	215	6	5	4	5	8	4	7	3	12	12	11	4
macs2_2.9e9_minus_peak_1253	chr1	21389433	21389656	-	224	8	5	13	15	8	11	11	11	26	23	17	10
macs2_2.9e9_minus_peak_1254	chr1	21393504	21393798	-	295	13	14	9	14	4	5	1	10	17	23	17	19
macs2_2.9e9_minus_peak_1255	chr1	21396328	21396574	-	247	12	4	7	4	3	1	2	0	13	14	7	3
macs2_2.9e9_minus_peak_1256	chr1	21397273	21397476	-	204	0	0	0	0	2	2	1	1	15	11	11	7
macs2_2.9e9_minus_peak_1257	chr1	21398200	21398443	-	244	9	4	8	6	3	7	1	3	20	20	2	13
macs2_2.9e9_minus_peak_1258	chr1	21407841	21408519	-	679	24	33	33	25	22	26	8	14	60	61	60	41
macs2_2.9e9_minus_peak_1259	chr1	21409771	21410006	-	236	6	10	11	6	8	4	5	5	11	15	8	5
macs2_2.9e9_minus_peak_1260	chr1	21412620	21412894	-	275	8	14	15	15	2	6	3	10	22	38	12	17
macs2_2.9e9_minus_peak_1261	chr1	21418818	21419123	-	306	19	15	7	17	5	7	4	4	13	11	13	13
macs2_2.9e9_minus_peak_1262	chr1	21420607	21421021	-	415	22	12	11	14	6	3	1	2	11	9	15	9
macs2_2.9e9_minus_peak_1263	chr1	21423650	21423857	-	208	2	5	0	5	2	0	3	1	3	8	6	11
macs2_2.9e9_minus_peak_1264	chr1	21432432	21432955	-	524	85	89	51	65	24	38	29	31	99	89	60	72
macs2_2.9e9_minus_peak_1265	chr1	21439764	21440051	-	288	8	3	6	4	2	3	1	1	7	8	7	5
macs2_2.9e9_minus_peak_1266	chr1	21440468	21440800	-	333	13	13	13	17	6	5	4	8	16	14	22	18
macs2_2.9e9_minus_peak_1267	chr1	21445965	21446302	-	338	2	6	1	0	1	0	1	2	10	5	3	5
macs2_2.9e9_minus_peak_1268	chr1	21446603	21446882	-	280	16	18	11	22	4	9	7	5	10	22	22	17
macs2_2.9e9_minus_peak_1269	chr1	21447221	21447430	-	210	3	7	3	2	0	1	1	0	18	4	6	4
macs2_2.9e9_minus_peak_1270	chr1	21452081	21452289	-	209	5	5	12	3	1	9	3	13	15	16	0	17
macs2_2.9e9_minus_peak_1271	chr1	21453334	21453608	-	275	17	12	6	12	11	6	7	1	7	23	6	13
macs2_2.9e9_minus_peak_1272	chr1	21456622	21456866	-	245	6	12	6	9	6	8	6	10	10	14	6	9
macs2_2.9e9_minus_peak_1273	chr1	21458976	21459359	-	384	5	9	8	7	3	4	2	2	10	8	10	13
macs2_2.9e9_minus_peak_1274	chr1	21461295	21461516	-	222	9	13	7	11	4	5	5	6	14	18	24	10
macs2_2.9e9_minus_peak_1275	chr1	21463489	21463904	-	416	46	54	50	36	19	26	20	20	89	68	64	49
macs2_2.9e9_minus_peak_1276	chr1	21466100	21466311	-	212	19	18	21	10	13	14	13	15	39	24	38	25
macs2_2.9e9_minus_peak_1277	chr1	21468964	21469169	-	206	10	8	4	5	5	2	1	9	6	11	11	7
macs2_2.9e9_minus_peak_1278	chr1	21469623	21469844	-	222	17	7	7	2	4	5	1	7	12	9	8	10
macs2_2.9e9_minus_peak_1279	chr1	21470622	21470924	-	303	80	64	57	55	38	34	30	32	132	117	127	99
macs2_2.9e9_minus_peak_1280	chr1	21472316	21472524	-	209	13	11	9	9	4	11	2	10	22	12	17	7
macs2_2.9e9_minus_peak_1281	chr1	21474474	21474727	-	254	13	8	15	17	4	10	6	5	23	20	13	12
macs2_2.9e9_minus_peak_1282	chr1	21475900	21476160	-	261	10	4	5	5	0	1	3	2	4	8	2	7
macs2_2.9e9_minus_peak_1283	chr1	21477333	21477877	-	545	187	129	115	140	29	85	47	50	156	218	111	140
macs2_2.9e9_minus_peak_1284	chr1	21482723	21483285	-	563	50	36	26	34	21	23	12	13	46	38	52	45
macs2_2.9e9_minus_peak_1285	chr1	21483419	21483998	-	580	104	127	60	95	44	88	37	48	192	95	142	111
macs2_2.9e9_minus_peak_1286	chr1	21484203	21484424	-	222	7	15	6	11	0	6	4	7	13	12	14	11
macs2_2.9e9_minus_peak_1287	chr1	21484569	21485103	-	535	139	111	124	131	62	97	69	91	217	192	210	149
macs2_2.9e9_minus_peak_1288	chr1	21491256	21491482	-	227	9	2	5	3	0	6	2	3	9	4	12	1
macs2_2.9e9_minus_peak_1289	chr1	21492477	21492736	-	260	12	21	15	20	7	17	10	14	28	15	24	17
macs2_2.9e9_minus_peak_1290	chr1	21493187	21493390	-	204	7	2	5	2	1	7	2	2	12	13	4	4
macs2_2.9e9_minus_peak_1291	chr1	21493645	21493883	-	239	9	10	6	16	5	8	7	1	13	13	13	13
macs2_2.9e9_minus_peak_1292	chr1	21495924	21496212	-	289	17	13	13	17	5	12	5	7	16	17	9	14
macs2_2.9e9_minus_peak_1293	chr1	21501478	21502351	-	874	243	223	238	190	69	115	134	169	258	215	168	211
macs2_2.9e9_minus_peak_1294	chr1	21543608	21543991	-	384	685	722	240	382	168	202	183	278	258	230	268	302
macs2_2.9e9_minus_peak_1295	chr1	21545002	21545343	-	342	93	77	36	42	30	32	30	33	26	39	42	36
macs2_2.9e9_minus_peak_1296	chr1	21545912	21546260	-	349	36	37	40	19	15	17	21	33	11	7	10	14
macs2_2.9e9_minus_peak_1297	chr1	21555565	21555801	-	237	5	9	7	12	5	5	3	2	7	4	4	1
macs2_2.9e9_minus_peak_1298	chr1	21558713	21558918	-	206	3	2	1	1	3	0	1	0	0	0	2	5
macs2_2.9e9_minus_peak_1299	chr1	21565261	21565695	-	435	1	10	7	9	3	5	2	4	5	1	0	3
macs2_2.9e9_minus_peak_1300	chr1	21567825	21568040	-	216	5	1	6	3	3	2	2	2	0	1	5	2
macs2_2.9e9_minus_peak_1301	chr1	21574588	21574787	-	200	1	1	0	0	1	1	0	0	2	2	2	0
macs2_2.9e9_minus_peak_1302	chr1	21576223	21576579	-	357	1	5	3	1	0	1	0	0	2	1	3	2
macs2_2.9e9_minus_peak_1303	chr1	21585024	21585257	-	234	11	18	4	5	2	0	4	6	2	4	4	3
macs2_2.9e9_minus_peak_1304	chr1	21589750	21589949	-	200	0	0	1	0	0	1	2	1	1	1	2	1
macs2_2.9e9_minus_peak_1305	chr1	21602405	21602677	-	273	8	7	6	10	2	4	7	0	7	3	12	7
macs2_2.9e9_minus_peak_1306	chr1	21614309	21614703	-	395	3	1	6	1	0	0	5	0	5	6	0	2
macs2_2.9e9_minus_peak_1307	chr1	21623907	21624185	-	279	3	2	1	2	1	0	1	0	8	1	4	1
macs2_2.9e9_minus_peak_1308	chr1	21626845	21627049	-	205	3	2	2	2	0	2	1	0	6	3	0	1
macs2_2.9e9_minus_peak_1309	chr1	21632658	21632942	-	285	0	1	1	0	2	0	2	0	4	3	2	5
macs2_2.9e9_minus_peak_1310	chr1	21636142	21636444	-	303	1	3	3	2	1	0	1	2	6	2	3	2
macs2_2.9e9_minus_peak_1311	chr1	21645767	21645970	-	204	3	1	0	0	0	0	1	0	4	5	5	1
macs2_2.9e9_minus_peak_1312	chr1	21646782	21647208	-	427	0	0	1	0	0	0	2	0	13	16	4	8
macs2_2.9e9_minus_peak_1313	chr1	21650200	21650556	-	357	4	2	1	4	2	2	1	2	3	6	10	5
macs2_2.9e9_minus_peak_1314	chr1	21654595	21654797	-	203	5	2	1	1	1	0	0	1	9	3	4	3
macs2_2.9e9_minus_peak_1315	chr1	21656500	21656798	-	299	18	40	20	32	18	20	22	16	66	60	65	52
macs2_2.9e9_minus_peak_1316	chr1	21667200	21667528	-	329	4	2	1	3	1	2	0	2	1	3	1	1
macs2_2.9e9_minus_peak_1317	chr1	21668194	21668394	-	201	0	2	1	2	2	0	0	0	0	1	4	3
macs2_2.9e9_minus_peak_1318	chr1	21749468	21749913	-	446	30	23	18	36	10	19	13	14	19	29	27	30
macs2_2.9e9_minus_peak_1319	chr1	21828422	21828621	-	200	0	0	0	0	0	2	0	0	0	1	0	0
macs2_2.9e9_minus_peak_1320	chr1	21863273	21863562	-	290	1	0	0	1	0	2	1	1	1	1	1	0
macs2_2.9e9_minus_peak_1321	chr1	21871672	21871903	-	232	1	0	3	1	3	5	2	1	2	2	3	1
macs2_2.9e9_minus_peak_1322	chr1	21922567	21923335	-	769	51	30	36	39	23	24	21	27	76	34	57	46
macs2_2.9e9_minus_peak_1323	chr1	21933072	21933336	-	265	1	0	1	4	3	0	0	0	4	3	4	1
macs2_2.9e9_minus_peak_1324	chr1	21935818	21936023	-	206	2	2	2	3	1	2	3	1	0	0	1	4
macs2_2.9e9_minus_peak_1325	chr1	21936812	21937014	-	203	0	0	3	3	0	1	2	1	1	1	1	0
macs2_2.9e9_minus_peak_1326	chr1	21985316	21985693	-	378	16	10	17	26	42	49	14	24	41	19	19	16
macs2_2.9e9_minus_peak_1327	chr1	21991183	21991410	-	228	1	0	0	1	0	0	0	2	7	0	2	3
macs2_2.9e9_minus_peak_1328	chr1	22004728	22005893	-	1166	350	378	233	272	115	204	151	205	289	274	215	258
macs2_2.9e9_minus_peak_1329	chr1	22008826	22009039	-	214	20	24	16	40	18	18	13	15	15	17	11	16
macs2_2.9e9_minus_peak_1330	chr1	22011660	22012010	-	351	38	45	32	39	19	33	23	31	30	29	20	12
macs2_2.9e9_minus_peak_1331	chr1	22016930	22017509	-	580	18	25	20	26	17	13	10	11	19	8	9	8
macs2_2.9e9_minus_peak_1332	chr1	22017994	22018265	-	272	9	5	11	9	8	2	3	1	11	4	3	6
macs2_2.9e9_minus_peak_1333	chr1	22025329	22025743	-	415	8	2	6	4	2	0	5	6	3	3	1	4
macs2_2.9e9_minus_peak_1334	chr1	22026798	22026998	-	201	3	4	4	6	1	5	4	1	2	0	2	0
macs2_2.9e9_minus_peak_1335	chr1	22027867	22028081	-	215	12	9	5	6	11	5	2	4	11	13	9	7
macs2_2.9e9_minus_peak_1336	chr1	22031117	22031446	-	330	11	7	11	4	4	4	2	4	8	3	6	0
macs2_2.9e9_minus_peak_1337	chr1	22033132	22033333	-	202	9	1	6	9	4	1	3	6	9	2	9	4
macs2_2.9e9_minus_peak_1338	chr1	22037380	22037641	-	262	16	17	7	19	4	7	7	5	3	6	3	7
macs2_2.9e9_minus_peak_1339	chr1	22039516	22039755	-	240	5	11	2	11	4	3	6	5	7	4	3	3
macs2_2.9e9_minus_peak_1340	chr1	22042484	22042830	-	347	64	44	48	79	42	29	39	37	43	17	35	22
macs2_2.9e9_minus_peak_1341	chr1	22046912	22047130	-	219	13	28	48	17	28	13	20	28	17	6	33	7
macs2_2.9e9_minus_peak_1342	chr1	22047383	22047653	-	271	655	859	366	665	265	323	236	312	401	412	514	442
macs2_2.9e9_minus_peak_1343	chr1	22047975	22048239	-	265	90	100	52	62	26	39	26	46	51	47	50	52
macs2_2.9e9_minus_peak_1344	chr1	22050236	22050570	-	335	33	20	16	14	5	14	13	18	15	20	14	21
macs2_2.9e9_minus_peak_1345	chr1	22051207	22051416	-	210	5	9	19	5	8	10	6	10	7	5	2	6
macs2_2.9e9_minus_peak_1346	chr1	22054230	22054689	-	460	25	23	46	19	11	18	13	25	16	19	20	32
macs2_2.9e9_minus_peak_1347	chr1	22054855	22055176	-	322	23	18	18	23	16	14	20	14	14	10	14	17
macs2_2.9e9_minus_peak_1348	chr1	22060188	22060452	-	265	30	21	30	37	12	18	13	20	19	10	13	9
macs2_2.9e9_minus_peak_1349	chr1	22060826	22061037	-	212	1	5	3	2	2	1	2	0	5	0	2	1
macs2_2.9e9_minus_peak_1350	chr1	22062758	22063076	-	319	19	20	14	21	10	19	15	8	26	17	15	10
macs2_2.9e9_minus_peak_1351	chr1	22064297	22064510	-	214	16	10	10	14	5	7	6	10	13	6	4	7
macs2_2.9e9_minus_peak_1352	chr1	22073388	22073610	-	223	26	22	14	23	9	17	15	8	23	16	17	13
macs2_2.9e9_minus_peak_1353	chr1	22074504	22074767	-	264	36	18	28	20	8	13	11	11	10	16	26	16
macs2_2.9e9_minus_peak_1354	chr1	22075998	22076506	-	509	27	22	30	33	20	11	10	17	32	20	24	20
macs2_2.9e9_minus_peak_1355	chr1	22076705	22076960	-	256	8	12	13	20	6	8	6	5	12	9	7	8
macs2_2.9e9_minus_peak_1356	chr1	22081495	22081770	-	276	8	11	13	19	11	12	10	10	12	8	7	13
macs2_2.9e9_minus_peak_1357	chr1	22082914	22083237	-	324	40	39	18	33	18	20	28	16	35	14	45	17
macs2_2.9e9_minus_peak_1358	chr1	22084032	22084253	-	222	43	24	32	40	23	29	9	25	23	31	43	26
macs2_2.9e9_minus_peak_1359	chr1	22087676	22088010	-	335	8	4	8	8	3	2	3	7	3	2	5	7
macs2_2.9e9_minus_peak_1360	chr1	22089619	22089820	-	202	4	3	0	3	3	2	3	3	2	2	3	5
macs2_2.9e9_minus_peak_1361	chr1	22094068	22094299	-	232	3	0	1	9	1	1	0	1	3	1	0	0
macs2_2.9e9_minus_peak_1362	chr1	22096879	22097078	-	200	1	1	3	4	0	3	5	1	1	4	1	1
macs2_2.9e9_minus_peak_1363	chr1	22102775	22103001	-	227	12	16	17	11	3	11	3	3	2	3	6	4
macs2_2.9e9_minus_peak_1364	chr1	22107108	22107360	-	253	8	3	6	8	4	2	2	4	4	3	2	5
macs2_2.9e9_minus_peak_1365	chr1	22107767	22107994	-	228	6	1	5	4	0	2	4	2	8	1	1	0
macs2_2.9e9_minus_peak_1366	chr1	22109134	22109426	-	293	21	7	10	12	9	7	2	11	9	4	7	5
macs2_2.9e9_minus_peak_1367	chr1	22148599	22148993	-	395	51	44	64	46	19	30	13	23	29	21	41	31
macs2_2.9e9_minus_peak_1368	chr1	22151674	22151878	-	205	5	4	2	3	0	3	1	1	0	3	2	3
macs2_2.9e9_minus_peak_1369	chr1	22161504	22161897	-	394	8	6	7	3	2	2	2	1	0	0	6	4
macs2_2.9e9_minus_peak_1370	chr1	22193499	22193705	-	207	1	3	1	1	1	1	4	0	1	0	0	0
macs2_2.9e9_minus_peak_1371	chr1	22194152	22194382	-	231	1	2	0	5	4	1	1	2	1	0	3	2
macs2_2.9e9_minus_peak_1372	chr1	22197661	22197881	-	221	6	3	7	5	7	3	1	3	2	2	2	4
macs2_2.9e9_minus_peak_1373	chr1	22214846	22215121	-	276	5	3	3	5	1	3	3	2	4	1	2	3
macs2_2.9e9_minus_peak_1374	chr1	22243089	22243300	-	212	0	1	0	2	0	0	0	0	4	5	3	6
macs2_2.9e9_minus_peak_1375	chr1	22244310	22244635	-	326	1	1	3	1	1	0	0	0	1	3	3	1
macs2_2.9e9_minus_peak_1376	chr1	22245112	22245311	-	200	0	1	0	0	0	0	0	1	1	0	4	2
macs2_2.9e9_minus_peak_1377	chr1	22252255	22252481	-	227	3	5	3	3	0	0	1	2	3	0	1	4
macs2_2.9e9_minus_peak_1378	chr1	22255866	22256301	-	436	35	28	26	26	18	20	7	17	47	40	62	45
macs2_2.9e9_minus_peak_1379	chr1	22261004	22261312	-	309	0	3	0	3	0	3	1	1	1	4	4	0
macs2_2.9e9_minus_peak_1380	chr1	22349059	22349430	-	372	2	2	4	6	1	7	2	4	14	7	7	6
macs2_2.9e9_minus_peak_1381	chr1	22350442	22350707	-	266	0	2	0	1	0	0	0	2	0	1	4	1
macs2_2.9e9_minus_peak_1382	chr1	22381266	22381522	-	257	5	6	5	5	1	5	6	1	4	7	1	7
macs2_2.9e9_minus_peak_1383	chr1	22455129	22455328	-	200	0	0	0	0	0	0	0	1	4	0	1	1
macs2_2.9e9_minus_peak_1384	chr1	22467664	22467882	-	219	2	0	0	2	1	0	2	0	5	2	1	3
macs2_2.9e9_minus_peak_1385	chr1	22485892	22486092	-	201	0	0	0	0	0	1	0	0	0	0	0	0
macs2_2.9e9_minus_peak_1386	chr1	22685998	22686249	-	252	1	0	0	1	0	2	0	1	3	1	2	0
macs2_2.9e9_minus_peak_1387	chr1	22941584	22941785	-	202	4	5	0	1	2	1	0	0	2	2	1	1
macs2_2.9e9_minus_peak_1388	chr1	23159547	23159791	-	245	1	0	1	2	0	1	0	2	0	1	1	5
macs2_2.9e9_minus_peak_1389	chr1	23338402	23338611	-	210	10	8	2	7	2	2	1	2	8	1	3	6
macs2_2.9e9_minus_peak_1390	chr1	23339310	23339515	-	206	3	3	1	1	0	3	1	0	4	3	5	2
macs2_2.9e9_minus_peak_1391	chr1	23339993	23340306	-	314	18	14	6	9	4	4	4	1	8	11	8	11
macs2_2.9e9_minus_peak_1392	chr1	23344512	23344984	-	473	20	12	13	14	2	8	3	4	14	14	11	15
macs2_2.9e9_minus_peak_1393	chr1	23404711	23405027	-	317	7	14	2	11	6	9	1	3	3	4	0	4
macs2_2.9e9_minus_peak_1394	chr1	23410141	23410788	-	648	21	31	14	9	8	6	7	11	12	10	18	11
macs2_2.9e9_minus_peak_1395	chr1	23411321	23411746	-	426	54	36	13	19	24	22	13	21	29	46	46	36
macs2_2.9e9_minus_peak_1396	chr1	23419626	23420643	-	1018	184	180	81	118	67	83	66	76	115	133	121	120
macs2_2.9e9_minus_peak_1397	chr1	23429322	23429653	-	332	8	7	4	1	0	2	6	4	1	5	5	8
macs2_2.9e9_minus_peak_1398	chr1	23430570	23430827	-	258	4	10	6	2	0	2	4	0	6	1	2	1
macs2_2.9e9_minus_peak_1399	chr1	23432250	23432667	-	418	8	4	6	3	2	4	2	7	4	2	4	1
macs2_2.9e9_minus_peak_1400	chr1	23445552	23445898	-	347	10	8	5	5	8	8	5	3	9	12	16	7
macs2_2.9e9_minus_peak_1401	chr1	23451889	23452092	-	204	4	1	2	2	0	0	0	2	2	4	2	0
macs2_2.9e9_minus_peak_1402	chr1	23455951	23456176	-	226	6	5	1	2	0	0	2	0	5	3	4	1
macs2_2.9e9_minus_peak_1403	chr1	23456899	23457267	-	369	17	24	15	17	9	7	10	14	18	23	19	13
macs2_2.9e9_minus_peak_1404	chr1	23458417	23458718	-	302	0	4	0	1	3	3	1	2	4	4	5	5
macs2_2.9e9_minus_peak_1405	chr1	23461226	23461425	-	200	3	4	2	3	1	2	3	0	4	4	2	3
macs2_2.9e9_minus_peak_1406	chr1	23469358	23469662	-	305	21	29	17	22	10	15	11	13	28	17	27	22
macs2_2.9e9_minus_peak_1407	chr1	23471281	23471480	-	200	5	2	2	1	1	0	0	3	3	4	3	2
macs2_2.9e9_minus_peak_1408	chr1	23471695	23471940	-	246	9	5	7	2	1	3	5	7	4	6	2	4
macs2_2.9e9_minus_peak_1409	chr1	23474198	23474485	-	288	8	4	3	2	3	4	1	1	3	2	0	4
macs2_2.9e9_minus_peak_1410	chr1	23479253	23479728	-	476	16	11	15	5	6	7	3	6	24	12	13	18
macs2_2.9e9_minus_peak_1411	chr1	23480092	23480321	-	230	2	5	0	3	4	2	1	1	2	2	3	5
macs2_2.9e9_minus_peak_1412	chr1	23481200	23481496	-	297	5	2	4	1	2	1	2	0	11	0	2	5
macs2_2.9e9_minus_peak_1413	chr1	23489236	23489435	-	200	4	3	5	0	3	0	0	0	2	1	2	2
macs2_2.9e9_minus_peak_1414	chr1	23491434	23491998	-	565	8	6	4	13	3	4	6	4	7	5	13	12
macs2_2.9e9_minus_peak_1415	chr1	23496896	23497117	-	222	3	1	2	1	0	4	0	0	1	2	0	0
macs2_2.9e9_minus_peak_1416	chr1	23499746	23500032	-	287	3	6	1	1	2	4	2	2	5	1	0	0
macs2_2.9e9_minus_peak_1417	chr1	23518307	23518605	-	299	1	1	0	0	1	0	1	1	3	3	3	3
macs2_2.9e9_minus_peak_1418	chr1	23539196	23539425	-	230	1	1	1	0	2	2	3	1	1	1	1	2
macs2_2.9e9_minus_peak_1419	chr1	23606446	23606741	-	296	10	13	4	8	1	7	3	3	8	7	6	4
macs2_2.9e9_minus_peak_1420	chr1	23607675	23608048	-	374	39	52	17	39	15	20	8	14	16	32	14	19
macs2_2.9e9_minus_peak_1421	chr1	23610809	23611120	-	312	12	3	13	15	4	9	7	1	19	15	13	13
macs2_2.9e9_minus_peak_1422	chr1	23611465	23611675	-	211	12	5	7	9	2	6	2	0	5	9	7	6
macs2_2.9e9_minus_peak_1423	chr1	23614362	23614563	-	202	4	6	3	5	1	2	0	3	4	5	8	2
macs2_2.9e9_minus_peak_1424	chr1	23617032	23617364	-	333	5	6	0	5	1	2	3	5	12	3	6	4
macs2_2.9e9_minus_peak_1425	chr1	23620478	23620701	-	224	5	14	4	5	4	6	3	1	9	7	16	6
macs2_2.9e9_minus_peak_1426	chr1	23620880	23621188	-	309	3	12	3	4	4	4	4	9	6	5	14	4
macs2_2.9e9_minus_peak_1427	chr1	23627219	23627540	-	322	52	80	36	70	19	37	20	24	36	45	41	31
macs2_2.9e9_minus_peak_1428	chr1	23627724	23628018	-	295	29	36	19	21	21	24	5	18	33	31	20	22
macs2_2.9e9_minus_peak_1429	chr1	23628341	23628620	-	280	37	45	18	19	5	11	12	16	18	15	7	18
macs2_2.9e9_minus_peak_1430	chr1	23630294	23630718	-	425	53	38	29	32	19	21	18	21	35	32	16	25
macs2_2.9e9_minus_peak_1431	chr1	23631059	23631456	-	398	33	16	44	48	24	25	21	34	34	13	15	20
macs2_2.9e9_minus_peak_1432	chr1	23633806	23634028	-	223	33	18	22	34	7	10	16	15	18	16	6	15
macs2_2.9e9_minus_peak_1433	chr1	23635943	23637166	-	1224	2049	1707	2058	1955	998	1349	1279	1588	1999	1596	1383	1552
macs2_2.9e9_minus_peak_1434	chr1	23639887	23640176	-	290	368	360	284	352	208	202	206	200	271	223	290	212
macs2_2.9e9_minus_peak_1435	chr1	23644814	23645231	-	418	258	209	202	211	118	136	155	126	180	144	154	121
macs2_2.9e9_minus_peak_1436	chr1	23645659	23646148	-	490	46	52	48	44	20	48	24	46	28	19	29	29
macs2_2.9e9_minus_peak_1437	chr1	23646423	23646926	-	504	259	188	221	182	116	114	131	108	159	83	120	109
macs2_2.9e9_minus_peak_1438	chr1	23647885	23648157	-	273	49	43	41	46	27	27	53	35	50	33	47	41
macs2_2.9e9_minus_peak_1439	chr1	23649882	23650151	-	270	33	48	30	32	17	20	34	20	25	21	22	29
macs2_2.9e9_minus_peak_1440	chr1	23652601	23652971	-	371	26	27	38	22	12	11	21	15	20	15	8	13
macs2_2.9e9_minus_peak_1441	chr1	23658516	23658717	-	202	2	3	5	2	1	1	1	4	3	2	2	1
macs2_2.9e9_minus_peak_1442	chr1	23659825	23660041	-	217	10	2	7	11	2	2	6	3	2	9	1	4
macs2_2.9e9_minus_peak_1443	chr1	23660641	23660859	-	219	12	3	3	6	2	5	3	2	3	5	4	3
macs2_2.9e9_minus_peak_1444	chr1	23664839	23665093	-	255	20	16	12	10	11	8	7	8	21	9	8	9
macs2_2.9e9_minus_peak_1445	chr1	23667180	23667481	-	302	6	4	8	7	6	6	5	4	10	13	11	6
macs2_2.9e9_minus_peak_1446	chr1	23670521	23670813	-	293	58	17	41	44	28	23	26	32	60	48	49	39
macs2_2.9e9_minus_peak_1447	chr1	23673094	23673436	-	343	5	4	6	4	6	3	4	2	3	0	5	8
macs2_2.9e9_minus_peak_1448	chr1	23682678	23682974	-	297	2	4	8	3	2	5	1	5	3	9	3	4
macs2_2.9e9_minus_peak_1449	chr1	23685813	23686209	-	397	23	24	32	38	15	31	15	41	35	34	15	29
macs2_2.9e9_minus_peak_1450	chr1	23686353	23686838	-	486	13	13	14	10	5	10	3	7	17	10	4	21
macs2_2.9e9_minus_peak_1451	chr1	23693354	23693576	-	223	2	0	2	2	0	0	0	1	1	0	2	1
macs2_2.9e9_minus_peak_1452	chr1	23707536	23707990	-	455	2	10	4	5	2	4	4	2	8	7	3	3
macs2_2.9e9_minus_peak_1453	chr1	23710685	23710885	-	201	1	5	3	3	1	1	0	0	3	2	0	1
macs2_2.9e9_minus_peak_1454	chr1	23754917	23755425	-	509	66	49	59	50	26	28	22	28	55	61	66	65
macs2_2.9e9_minus_peak_1455	chr1	23755590	23755795	-	206	6	4	2	6	0	0	2	5	7	7	8	4
macs2_2.9e9_minus_peak_1456	chr1	23760464	23760736	-	273	7	5	3	0	2	4	2	1	0	2	2	3
macs2_2.9e9_minus_peak_1457	chr1	23769927	23770175	-	249	5	5	2	9	6	3	3	1	2	3	4	8
macs2_2.9e9_minus_peak_1458	chr1	23771350	23771629	-	280	5	2	2	4	3	1	3	3	7	1	2	5
macs2_2.9e9_minus_peak_1459	chr1	23774101	23774512	-	412	5	14	3	10	4	4	1	5	2	3	8	6
macs2_2.9e9_minus_peak_1460	chr1	23776941	23777248	-	308	2	1	9	1	2	2	2	2	4	2	1	1
macs2_2.9e9_minus_peak_1461	chr1	23789990	23790196	-	207	0	2	0	0	2	1	1	0	1	2	4	0
macs2_2.9e9_minus_peak_1462	chr1	23791870	23792103	-	234	6	2	4	2	0	3	0	2	5	2	2	4
macs2_2.9e9_minus_peak_1463	chr1	23800354	23800573	-	220	4	4	4	6	0	2	0	4	7	4	6	4
macs2_2.9e9_minus_peak_1464	chr1	23803250	23803560	-	311	8	4	10	5	3	0	0	1	1	5	9	3
macs2_2.9e9_minus_peak_1465	chr1	23825031	23825230	-	200	0	3	0	1	2	0	0	0	0	1	1	0
macs2_2.9e9_minus_peak_1466	chr1	23832795	23833380	-	586	274	260	263	321	133	260	192	254	350	290	407	398
macs2_2.9e9_minus_peak_1467	chr1	23837641	23837896	-	256	12	11	24	18	6	8	5	15	11	14	6	5
macs2_2.9e9_minus_peak_1468	chr1	23839497	23839901	-	405	24	38	24	31	14	18	8	19	10	16	28	19
macs2_2.9e9_minus_peak_1469	chr1	23841930	23842223	-	294	6	9	4	3	4	0	3	1	4	4	4	2
macs2_2.9e9_minus_peak_1470	chr1	23849539	23849752	-	214	1	0	0	1	1	3	1	0	1	0	2	1
macs2_2.9e9_minus_peak_1471	chr1	23857593	23857856	-	264	31	35	54	34	36	44	40	35	87	61	107	60
macs2_2.9e9_minus_peak_1472	chr1	23874533	23874796	-	264	1	4	7	9	5	8	1	6	11	3	15	6
macs2_2.9e9_minus_peak_1473	chr1	23875522	23875890	-	369	1	4	1	5	5	5	10	10	15	8	10	10
macs2_2.9e9_minus_peak_1474	chr1	23884289	23884849	-	561	3569	2942	3297	3286	1404	1889	1561	1985	3152	2808	3223	3073
macs2_2.9e9_minus_peak_1475	chr1	23963628	23963827	-	200	0	0	1	0	1	0	0	0	1	1	0	0
macs2_2.9e9_minus_peak_1476	chr1	24006761	24007154	-	394	0	2	3	0	3	2	1	4	2	0	3	2
macs2_2.9e9_minus_peak_1477	chr1	24076630	24076837	-	208	0	0	1	2	0	0	0	1	0	0	1	1
macs2_2.9e9_minus_peak_1478	chr1	24086756	24087322	-	567	51	68	54	70	51	62	36	71	93	72	86	61
macs2_2.9e9_minus_peak_1479	chr1	24088526	24088867	-	342	41	46	26	14	14	14	18	11	18	18	27	27
macs2_2.9e9_minus_peak_1480	chr1	24089860	24090490	-	631	55	59	21	45	8	9	5	20	22	20	25	15
macs2_2.9e9_minus_peak_1481	chr1	24091585	24091829	-	245	35	41	23	35	9	35	15	23	31	15	6	26
macs2_2.9e9_minus_peak_1482	chr1	24097766	24098188	-	423	14	6	10	3	7	0	3	1	10	3	5	6
macs2_2.9e9_minus_peak_1483	chr1	24098503	24098722	-	220	4	5	0	6	1	5	1	1	8	2	4	3
macs2_2.9e9_minus_peak_1484	chr1	24099197	24099470	-	274	11	6	10	8	8	4	3	7	3	6	4	2
macs2_2.9e9_minus_peak_1485	chr1	24102921	24103158	-	238	5	11	6	9	4	9	3	3	3	3	9	4
macs2_2.9e9_minus_peak_1486	chr1	24103530	24104105	-	576	45	42	32	52	18	25	12	24	28	28	33	25
macs2_2.9e9_minus_peak_1487	chr1	24116303	24116559	-	257	4	1	3	2	2	2	3	2	4	2	0	1
macs2_2.9e9_minus_peak_1488	chr1	24121961	24122656	-	696	74	85	57	56	32	59	47	44	50	16	33	41
macs2_2.9e9_minus_peak_1489	chr1	24128235	24128886	-	652	155	118	144	113	63	99	69	96	110	140	125	95
macs2_2.9e9_minus_peak_1490	chr1	24135123	24135373	-	251	41	63	41	52	22	30	21	34	36	30	39	30
macs2_2.9e9_minus_peak_1491	chr1	24135648	24135881	-	234	11	18	5	11	0	7	5	4	8	3	8	5
macs2_2.9e9_minus_peak_1492	chr1	24139620	24139884	-	265	26	20	19	21	8	6	12	11	16	7	13	11
macs2_2.9e9_minus_peak_1493	chr1	24141642	24142094	-	453	8	4	8	3	4	8	3	1	3	5	4	4
macs2_2.9e9_minus_peak_1494	chr1	24142452	24142755	-	304	4	7	11	10	5	9	8	4	2	6	11	10
macs2_2.9e9_minus_peak_1495	chr1	24151667	24151921	-	255	71	45	64	67	56	49	55	59	62	37	69	47
macs2_2.9e9_minus_peak_1496	chr1	24157216	24157419	-	204	2	0	1	2	0	2	2	1	3	2	1	1
macs2_2.9e9_minus_peak_1497	chr1	24158600	24158852	-	253	1	4	2	4	0	2	0	2	3	3	2	1
macs2_2.9e9_minus_peak_1498	chr1	24171433	24171960	-	528	308	334	274	275	107	148	137	198	207	211	168	176
macs2_2.9e9_minus_peak_1499	chr1	24178941	24179140	-	200	0	3	1	1	0	0	0	1	0	0	0	1
macs2_2.9e9_minus_peak_1500	chr1	24185130	24185373	-	244	3	6	4	8	1	0	3	4	4	6	1	2
macs2_2.9e9_minus_peak_1501	chr1	24191112	24191311	-	200	0	3	0	2	0	1	0	1	1	0	1	3
macs2_2.9e9_minus_peak_1502	chr1	24191815	24192014	-	200	2	0	1	3	2	0	1	0	1	1	1	1
macs2_2.9e9_minus_peak_1503	chr1	24192648	24192902	-	255	2	1	3	4	0	0	1	1	0	2	2	0
macs2_2.9e9_minus_peak_1504	chr1	24232952	24233166	-	215	0	1	0	0	1	3	1	0	1	4	2	4
macs2_2.9e9_minus_peak_1505	chr1	24248149	24248394	-	246	7	7	12	7	4	15	7	8	11	7	5	16
macs2_2.9e9_minus_peak_1506	chr1	24275335	24275597	-	263	0	0	0	0	0	0	0	0	0	0	0	0
macs2_2.9e9_minus_peak_1507	chr1	24292797	24293368	-	572	2	6	4	1	0	4	0	1	4	2	0	2
macs2_2.9e9_minus_peak_1508	chr1	24293857	24294128	-	272	0	0	0	0	1	0	0	0	0	0	0	0
macs2_2.9e9_minus_peak_1509	chr1	24295456	24295981	-	526	2	0	0	0	0	0	0	0	0	0	0	0
macs2_2.9e9_minus_peak_1510	chr1	24300399	24300610	-	212	1	0	0	1	1	0	0	0	0	0	0	1
macs2_2.9e9_minus_peak_1511	chr1	24301990	24302250	-	261	0	0	0	0	0	0	0	0	0	0	0	0
macs2_2.9e9_minus_peak_1512	chr1	24304502	24305269	-	768	104	123	86	78	51	43	25	42	67	74	51	82
macs2_2.9e9_minus_peak_1513	chr1	24305439	24305936	-	498	69	46	42	34	18	16	29	20	43	21	7	30
macs2_2.9e9_minus_peak_1514	chr1	24312949	24313148	-	200	0	0	0	0	0	0	0	1	0	0	0	0
macs2_2.9e9_minus_peak_1515	chr1	24334152	24334626	-	475	3	5	2	6	3	5	3	1	4	0	0	4
macs2_2.9e9_minus_peak_1516	chr1	24374786	24374986	-	201	5	1	8	2	7	0	3	3	6	3	1	1
macs2_2.9e9_minus_peak_1517	chr1	24477607	24477852	-	246	9	5	4	9	3	8	9	9	17	21	16	11
macs2_2.9e9_minus_peak_1518	chr1	24480523	24480985	-	463	181	152	91	102	55	75	54	55	95	118	103	83
macs2_2.9e9_minus_peak_1519	chr1	24486159	24486387	-	229	14	9	4	6	3	0	5	4	10	5	5	9
macs2_2.9e9_minus_peak_1520	chr1	24489332	24489611	-	280	9	5	6	5	1	2	4	4	1	3	1	6
macs2_2.9e9_minus_peak_1521	chr1	24492486	24493302	-	817	39	20	14	20	10	10	8	13	10	14	21	10
macs2_2.9e9_minus_peak_1522	chr1	24497612	24497823	-	212	6	2	3	2	3	5	3	3	1	3	6	3
macs2_2.9e9_minus_peak_1523	chr1	24505481	24505760	-	280	0	2	2	3	3	6	2	1	1	5	4	1
macs2_2.9e9_minus_peak_1524	chr1	24632336	24632592	-	257	7	7	1	4	1	3	1	4	3	3	0	1
macs2_2.9e9_minus_peak_1525	chr1	24640643	24640850	-	208	2	2	0	1	2	1	2	2	3	4	7	4
macs2_2.9e9_minus_peak_1526	chr1	24643108	24643492	-	385	5	8	4	2	1	4	2	1	4	6	4	2
macs2_2.9e9_minus_peak_1527	chr1	24683348	24683814	-	467	61	64	26	38	14	34	17	29	66	39	31	35
macs2_2.9e9_minus_peak_1528	chr1	24684453	24684725	-	273	2	4	1	11	2	6	0	4	5	4	4	4
macs2_2.9e9_minus_peak_1529	chr1	24693334	24693776	-	443	4	7	7	6	2	6	1	3	5	5	5	3
macs2_2.9e9_minus_peak_1530	chr1	24701053	24701278	-	226	4	4	2	2	1	1	0	1	3	2	1	2
macs2_2.9e9_minus_peak_1531	chr1	24709298	24709796	-	499	7	6	4	7	7	5	1	9	12	6	0	5
macs2_2.9e9_minus_peak_1532	chr1	24715265	24715474	-	210	3	2	4	14	1	5	0	4	3	0	2	0
macs2_2.9e9_minus_peak_1533	chr1	24717138	24717910	-	773	35	56	32	55	25	32	12	18	39	30	22	27
macs2_2.9e9_minus_peak_1534	chr1	24724641	24724840	-	200	3	2	2	3	0	0	1	4	5	1	0	0
macs2_2.9e9_minus_peak_1535	chr1	24727457	24727861	-	405	14	11	12	7	8	2	8	7	7	3	7	10
macs2_2.9e9_minus_peak_1536	chr1	24728113	24728314	-	202	4	3	1	3	4	3	1	2	1	1	3	1
macs2_2.9e9_minus_peak_1537	chr1	24733064	24733496	-	433	13	11	20	13	10	9	9	6	8	5	9	5
macs2_2.9e9_minus_peak_1538	chr1	24733830	24734046	-	217	8	3	4	5	4	5	3	6	7	4	4	0
macs2_2.9e9_minus_peak_1539	chr1	24738353	24738711	-	359	3	2	10	6	4	2	3	1	4	2	4	1
macs2_2.9e9_minus_peak_1540	chr1	24740003	24740228	-	226	8	5	3	1	0	4	4	0	4	3	3	4
macs2_2.9e9_minus_peak_1541	chr1	24740927	24741145	-	219	7	4	0	1	0	1	0	0	4	2	3	1
macs2_2.9e9_minus_peak_1542	chr1	24822629	24823030	-	402	7	6	13	4	4	6	3	0	8	5	3	11
macs2_2.9e9_minus_peak_1543	chr1	24828118	24828452	-	335	2	2	2	6	0	1	1	1	0	1	1	1
macs2_2.9e9_minus_peak_1544	chr1	24831648	24831848	-	201	0	0	1	0	0	0	1	2	4	1	2	0
macs2_2.9e9_minus_peak_1545	chr1	24858610	24858810	-	201	0	0	3	0	0	0	0	1	0	0	0	0
macs2_2.9e9_minus_peak_1546	chr1	24968555	24968807	-	253	1	1	3	2	1	4	1	1	5	5	9	5
macs2_2.9e9_minus_peak_1547	chr1	24999043	24999669	-	627	19	5	4	19	9	9	4	6	5	11	17	5
macs2_2.9e9_minus_peak_1548	chr1	25025646	25025851	-	206	2	1	2	1	0	0	0	0	1	1	0	0
macs2_2.9e9_minus_peak_1549	chr1	25031430	25031768	-	339	2	3	0	0	4	4	1	0	0	0	3	1
macs2_2.9e9_minus_peak_1550	chr1	25037334	25037546	-	213	0	2	0	0	0	5	1	2	4	4	2	1
macs2_2.9e9_minus_peak_1551	chr1	25053482	25053682	-	201	1	0	2	0	2	1	0	1	2	0	1	0
macs2_2.9e9_minus_peak_1552	chr1	25068017	25068367	-	351	0	4	2	0	0	0	1	1	1	1	2	3
macs2_2.9e9_minus_peak_1553	chr1	25092816	25093046	-	231	25	8	22	17	6	26	14	8	35	21	7	18
macs2_2.9e9_minus_peak_1554	chr1	25158898	25159218	-	321	1	0	1	0	0	0	0	0	0	0	0	0
macs2_2.9e9_minus_peak_1555	chr1	25225908	25226271	-	364	83	66	22	29	32	36	16	28	67	70	76	45
macs2_2.9e9_minus_peak_1556	chr1	25227386	25227797	-	412	24	26	16	18	9	16	13	10	24	21	22	13
macs2_2.9e9_minus_peak_1557	chr1	25250922	25251164	-	243	2	3	3	2	0	0	0	1	5	3	0	3
macs2_2.9e9_minus_peak_1558	chr1	25252850	25253076	-	227	2	2	3	3	1	0	5	1	1	1	1	1
macs2_2.9e9_minus_peak_1559	chr1	25549054	25549866	-	813	369	300	258	287	137	143	165	205	262	261	223	246
macs2_2.9e9_minus_peak_1560	chr1	25555330	25555597	-	268	93	89	51	81	41	38	36	58	69	65	75	68
macs2_2.9e9_minus_peak_1561	chr1	25558027	25558278	-	252	7	6	6	7	2	4	4	2	1	6	5	7
macs2_2.9e9_minus_peak_1562	chr1	25558413	25558983	-	571	284	209	164	198	70	80	100	102	154	163	140	153
macs2_2.9e9_minus_peak_1563	chr1	25568622	25569102	-	481	1529	1293	801	896	407	598	503	620	627	466	464	569
macs2_2.9e9_minus_peak_1564	chr1	25569896	25570101	-	206	20	9	17	9	5	7	3	2	7	9	3	5
macs2_2.9e9_minus_peak_1565	chr1	25570269	25570553	-	285	48	28	23	32	15	8	11	12	13	9	19	10
macs2_2.9e9_minus_peak_1566	chr1	25572798	25573086	-	289	101	108	29	53	25	24	24	25	27	14	35	31
macs2_2.9e9_minus_peak_1567	chr1	25578283	25578532	-	250	12	18	11	13	5	3	4	9	5	1	6	7
macs2_2.9e9_minus_peak_1568	chr1	25578708	25579161	-	454	12	16	4	12	6	5	2	3	3	2	4	9
macs2_2.9e9_minus_peak_1569	chr1	25582553	25582864	-	312	24	24	11	21	8	8	6	12	7	5	7	5
macs2_2.9e9_minus_peak_1570	chr1	25584000	25584222	-	223	29	33	12	14	4	7	7	11	4	3	6	11
macs2_2.9e9_minus_peak_1571	chr1	25588120	25588365	-	246	13	23	11	9	6	4	2	1	5	5	9	5
macs2_2.9e9_minus_peak_1572	chr1	25588774	25589122	-	349	8	9	13	17	8	8	3	4	17	0	9	4
macs2_2.9e9_minus_peak_1573	chr1	25589759	25590053	-	295	16	6	15	6	4	1	2	10	8	7	7	10
macs2_2.9e9_minus_peak_1574	chr1	25619699	25619918	-	220	17	18	18	16	22	19	25	23	39	18	37	24
macs2_2.9e9_minus_peak_1575	chr1	25620099	25620300	-	202	0	0	0	0	0	0	0	0	0	0	0	0
macs2_2.9e9_minus_peak_1576	chr1	25632051	25632252	-	202	1	5	1	5	0	1	1	0	6	1	1	1
macs2_2.9e9_minus_peak_1577	chr1	25655608	25655812	-	205	1	6	2	0	0	1	0	1	0	0	1	1
macs2_2.9e9_minus_peak_1578	chr1	25660073	25660514	-	442	0	0	0	0	0	1	0	0	0	0	0	0
macs2_2.9e9_minus_peak_1579	chr1	25662167	25662573	-	407	0	0	0	0	0	0	0	0	0	0	0	0
macs2_2.9e9_minus_peak_1580	chr1	25688612	25688997	-	386	8	9	7	7	5	9	2	3	5	5	7	4
macs2_2.9e9_minus_peak_1581	chr1	25696794	25696993	-	200	1	2	1	1	0	1	0	0	2	2	1	0
macs2_2.9e9_minus_peak_1582	chr1	25697772	25697972	-	201	1	1	2	2	4	1	0	0	2	0	3	3
macs2_2.9e9_minus_peak_1583	chr1	25702236	25702446	-	211	0	0	0	1	0	0	0	0	0	0	1	0
macs2_2.9e9_minus_peak_1584	chr1	25717920	25718121	-	202	0	0	0	3	1	1	0	0	0	2	0	2
macs2_2.9e9_minus_peak_1585	chr1	25728950	25729159	-	210	3	1	1	2	0	1	1	0	1	0	1	0
macs2_2.9e9_minus_peak_1586	chr1	25743023	25743679	-	657	14	10	4	6	3	6	7	2	5	10	11	14
macs2_2.9e9_minus_peak_1587	chr1	25750772	25750971	-	200	1	2	0	0	0	0	0	0	0	2	5	0
macs2_2.9e9_minus_peak_1588	chr1	25755574	25755943	-	370	9	13	11	9	4	13	3	12	16	11	11	17
macs2_2.9e9_minus_peak_1589	chr1	25983269	25983474	-	206	0	0	0	2	1	1	0	0	0	0	0	1
macs2_2.9e9_minus_peak_1590	chr1	26143133	26143477	-	345	6	2	7	0	0	3	0	1	3	1	3	3
macs2_2.9e9_minus_peak_1591	chr1	26144886	26145183	-	298	2	2	2	1	0	3	0	2	0	0	2	1
macs2_2.9e9_minus_peak_1592	chr1	26150441	26150647	-	207	0	1	0	2	0	0	0	1	2	2	4	1
macs2_2.9e9_minus_peak_1593	chr1	26158323	26158531	-	209	6	3	5	6	8	9	5	2	19	9	10	12
macs2_2.9e9_minus_peak_1594	chr1	26160368	26160792	-	425	96	74	69	84	33	51	46	56	73	77	72	87
macs2_2.9e9_minus_peak_1595	chr1	26161189	26161567	-	379	82	121	53	74	37	60	51	53	107	74	90	88
macs2_2.9e9_minus_peak_1596	chr1	26171003	26171281	-	279	2	4	3	2	2	2	3	3	3	6	12	5
macs2_2.9e9_minus_peak_1597	chr1	26173508	26173769	-	262	5	3	5	1	0	2	3	3	10	1	3	2
macs2_2.9e9_minus_peak_1598	chr1	26177268	26177530	-	263	7	7	10	8	5	2	1	2	6	8	6	5
macs2_2.9e9_minus_peak_1599	chr1	26181363	26181607	-	245	8	8	4	9	3	3	4	3	14	2	6	15
macs2_2.9e9_minus_peak_1600	chr1	26182998	26183221	-	224	7	5	5	7	2	10	9	6	12	2	7	15
macs2_2.9e9_minus_peak_1601	chr1	26187831	26188190	-	360	47	46	29	34	10	25	23	23	40	18	32	33
macs2_2.9e9_minus_peak_1602	chr1	26198918	26199221	-	304	7	6	4	6	1	6	4	3	4	9	7	4
macs2_2.9e9_minus_peak_1603	chr1	26199978	26200177	-	200	1	2	3	1	0	2	0	1	6	1	2	1
macs2_2.9e9_minus_peak_1604	chr1	26200258	26200467	-	210	4	4	4	2	0	5	1	1	2	2	2	4
macs2_2.9e9_minus_peak_1605	chr1	26200556	26201009	-	454	6	10	8	4	1	8	2	3	7	4	16	4
macs2_2.9e9_minus_peak_1606	chr1	26210533	26210799	-	267	2	0	0	0	1	1	1	6	1	0	3	0
macs2_2.9e9_minus_peak_1607	chr1	26218757	26219126	-	370	15	10	10	3	4	8	10	4	9	8	6	7
macs2_2.9e9_minus_peak_1608	chr1	26221095	26221317	-	223	1	3	1	4	6	4	5	2	2	1	7	1
macs2_2.9e9_minus_peak_1609	chr1	26226502	26227520	-	1019	5919	5017	5131	5348	2937	3746	2787	3463	4470	4132	4172	4294
macs2_2.9e9_minus_peak_1610	chr1	26227848	26228146	-	299	86	76	66	102	52	55	61	63	48	59	73	48
macs2_2.9e9_minus_peak_1611	chr1	26229980	26230248	-	269	47	32	36	35	27	37	31	28	42	33	51	31
macs2_2.9e9_minus_peak_1612	chr1	26286118	26286577	-	460	93	121	47	85	24	49	26	33	59	55	48	58
macs2_2.9e9_minus_peak_1613	chr1	26287148	26287491	-	344	26	14	11	15	4	8	9	10	8	9	9	9
macs2_2.9e9_minus_peak_1614	chr1	26298498	26298871	-	374	0	6	8	5	5	3	1	3	4	2	8	3
macs2_2.9e9_minus_peak_1615	chr1	26305744	26306055	-	312	12	7	8	10	1	3	2	6	6	3	12	2
macs2_2.9e9_minus_peak_1616	chr1	26321523	26321777	-	255	3	0	1	1	1	0	0	0	3	2	0	0
macs2_2.9e9_minus_peak_1617	chr1	26330223	26330673	-	451	6	7	2	0	2	0	0	0	4	5	1	1
macs2_2.9e9_minus_peak_1618	chr1	26351325	26351627	-	303	2	2	2	1	0	2	6	2	5	3	0	2
macs2_2.9e9_minus_peak_1619	chr1	26356716	26357032	-	317	9	5	4	11	0	1	3	3	7	7	5	6
macs2_2.9e9_minus_peak_1620	chr1	26435518	26435763	-	246	3	7	2	3	1	4	1	0	3	2	1	1
macs2_2.9e9_minus_peak_1621	chr1	26436832	26437130	-	299	1	1	4	4	3	3	4	0	1	2	4	0
macs2_2.9e9_minus_peak_1622	chr1	26443377	26443583	-	207	0	1	0	1	0	0	1	0	0	0	1	0
macs2_2.9e9_minus_peak_1623	chr1	26608727	26609372	-	646	20	19	20	7	2	16	6	16	20	38	11	16
macs2_2.9e9_minus_peak_1624	chr1	26621316	26621594	-	279	3	1	1	5	3	2	2	2	4	1	1	4
macs2_2.9e9_minus_peak_1625	chr1	26621923	26622127	-	205	0	0	0	0	0	3	1	0	2	1	7	1
macs2_2.9e9_minus_peak_1626	chr1	26631375	26631615	-	241	4	3	1	4	8	3	5	5	10	6	3	4
macs2_2.9e9_minus_peak_1627	chr1	26648220	26648754	-	535	34	34	25	39	15	26	19	20	44	27	33	40
macs2_2.9e9_minus_peak_1628	chr1	26662292	26662491	-	200	2	1	1	4	0	0	0	1	0	0	0	3
macs2_2.9e9_minus_peak_1629	chr1	26722464	26722728	-	265	1	2	10	2	3	6	4	4	4	4	1	4
macs2_2.9e9_minus_peak_1630	chr1	26757129	26757403	-	275	31	35	25	26	7	15	17	16	17	20	12	15
macs2_2.9e9_minus_peak_1631	chr1	26757665	26757992	-	328	2	5	2	0	1	1	2	1	4	3	0	1
macs2_2.9e9_minus_peak_1632	chr1	26774582	26774825	-	244	2	3	3	3	0	1	0	3	3	8	6	0
macs2_2.9e9_minus_peak_1633	chr1	26777878	26778104	-	227	1	2	0	1	2	1	0	0	0	4	3	5
macs2_2.9e9_minus_peak_1634	chr1	26780967	26781254	-	288	0	0	1	1	0	1	0	0	4	1	2	2
macs2_2.9e9_minus_peak_1635	chr1	26790376	26790646	-	271	5	4	3	4	6	8	3	4	4	4	6	4
macs2_2.9e9_minus_peak_1636	chr1	26796672	26797053	-	382	26	20	29	38	32	35	14	12	36	28	33	28
macs2_2.9e9_minus_peak_1637	chr1	26815126	26815335	-	210	2	2	2	0	0	2	1	0	3	2	1	0
macs2_2.9e9_minus_peak_1638	chr1	26824573	26824813	-	241	2	5	0	8	2	1	3	3	1	5	3	4
macs2_2.9e9_minus_peak_1639	chr1	26825896	26826096	-	201	3	1	3	1	2	0	1	2	2	0	1	2
macs2_2.9e9_minus_peak_1640	chr1	26831077	26831317	-	241	5	1	2	4	1	4	3	4	3	3	5	5
macs2_2.9e9_minus_peak_1641	chr1	26920051	26920250	-	200	0	0	0	0	1	0	0	0	2	1	1	0
macs2_2.9e9_minus_peak_1642	chr1	26963281	26963601	-	321	4	0	4	3	5	3	2	3	1	1	3	2
macs2_2.9e9_minus_peak_1643	chr1	26997633	26997859	-	227	0	0	0	0	0	1	0	0	3	3	1	1
macs2_2.9e9_minus_peak_1644	chr1	27020514	27020738	-	225	6	4	1	5	0	2	0	2	2	1	2	6
macs2_2.9e9_minus_peak_1645	chr1	27021401	27021746	-	346	15	9	7	10	5	11	6	6	6	6	14	6
macs2_2.9e9_minus_peak_1646	chr1	27111804	27112125	-	322	1	6	5	3	3	5	1	1	3	9	4	5
macs2_2.9e9_minus_peak_1647	chr1	27113683	27113973	-	291	6	1	1	0	0	1	0	2	2	1	4	2
macs2_2.9e9_minus_peak_1648	chr1	27178644	27178934	-	291	3	5	0	0	1	0	0	1	2	0	1	1
macs2_2.9e9_minus_peak_1649	chr1	27185991	27186451	-	461	8	11	3	0	1	0	1	1	3	7	11	4
macs2_2.9e9_minus_peak_1650	chr1	27194596	27194798	-	203	1	0	2	2	2	0	0	2	0	2	0	1
macs2_2.9e9_minus_peak_1651	chr1	27202499	27203202	-	704	95	93	43	65	29	45	34	54	47	39	55	51
macs2_2.9e9_minus_peak_1652	chr1	27205739	27206120	-	382	34	28	35	20	10	26	10	13	46	40	38	33
macs2_2.9e9_minus_peak_1653	chr1	27207253	27207475	-	223	14	14	9	10	10	6	5	8	7	8	6	3
macs2_2.9e9_minus_peak_1654	chr1	27209382	27209658	-	277	9	12	8	16	5	5	6	5	4	7	10	1
macs2_2.9e9_minus_peak_1655	chr1	27215697	27216040	-	344	15	14	8	11	5	8	4	3	3	4	4	3
macs2_2.9e9_minus_peak_1656	chr1	27216837	27217276	-	440	71	51	37	75	32	40	33	45	38	53	67	53
macs2_2.9e9_minus_peak_1657	chr1	27223731	27223930	-	200	1	3	0	0	0	1	1	0	1	1	2	2
macs2_2.9e9_minus_peak_1658	chr1	27226184	27226405	-	222	0	2	1	4	0	0	2	4	1	0	1	0
macs2_2.9e9_minus_peak_1659	chr1	27262524	27262726	-	203	0	3	0	1	0	2	1	0	0	1	0	0
macs2_2.9e9_minus_peak_1660	chr1	27318695	27318894	-	200	1	0	0	0	1	5	0	0	0	0	2	0
macs2_2.9e9_minus_peak_1661	chr1	27318999	27319388	-	390	4	1	3	1	3	4	1	0	1	0	2	5
macs2_2.9e9_minus_peak_1662	chr1	27331371	27331813	-	443	6	5	0	3	3	5	4	4	7	11	6	2
macs2_2.9e9_minus_peak_1663	chr1	27340057	27340471	-	415	26	12	19	22	17	25	10	23	22	21	28	35
macs2_2.9e9_minus_peak_1664	chr1	27425168	27425612	-	445	75	60	32	40	10	19	21	20	25	33	27	17
macs2_2.9e9_minus_peak_1665	chr1	27425904	27426108	-	205	2	7	2	4	3	4	0	6	2	1	1	1
macs2_2.9e9_minus_peak_1666	chr1	27430975	27431201	-	227	0	2	1	5	3	2	3	1	2	1	0	3
macs2_2.9e9_minus_peak_1667	chr1	27435062	27435262	-	201	2	1	2	1	1	2	0	1	2	6	0	0
macs2_2.9e9_minus_peak_1668	chr1	27446481	27446684	-	204	0	3	0	3	2	2	1	1	1	3	6	1
macs2_2.9e9_minus_peak_1669	chr1	27451591	27451905	-	315	10	3	0	1	1	4	0	2	2	6	5	3
macs2_2.9e9_minus_peak_1670	chr1	27461996	27462340	-	345	9	7	1	2	3	5	0	3	37	57	57	42
macs2_2.9e9_minus_peak_1671	chr1	27466211	27466417	-	207	2	4	4	5	1	3	0	0	2	5	8	6
macs2_2.9e9_minus_peak_1672	chr1	27466693	27466905	-	213	3	1	0	4	2	1	0	5	7	3	9	3
macs2_2.9e9_minus_peak_1673	chr1	27477698	27477977	-	280	1	2	0	1	0	0	0	0	1	1	2	3
macs2_2.9e9_minus_peak_1674	chr1	27526381	27526728	-	348	39	41	36	27	10	35	14	11	11	8	2	7
macs2_2.9e9_minus_peak_1675	chr1	27527608	27527846	-	239	0	0	0	0	0	2	0	1	0	0	0	0
macs2_2.9e9_minus_peak_1676	chr1	27681535	27681888	-	354	27	31	22	19	4	13	9	9	18	19	10	14
macs2_2.9e9_minus_peak_1677	chr1	27705531	27705903	-	373	2	2	4	2	0	2	1	1	3	4	14	6
macs2_2.9e9_minus_peak_1678	chr1	27730614	27731292	-	679	502	387	448	407	207	306	240	266	344	352	327	352
macs2_2.9e9_minus_peak_1679	chr1	27732006	27732480	-	475	810	529	778	776	431	406	441	463	732	570	738	596
macs2_2.9e9_minus_peak_1680	chr1	27741356	27741596	-	241	7	22	13	22	9	18	10	14	24	23	21	18
macs2_2.9e9_minus_peak_1681	chr1	27742326	27742651	-	326	111	147	105	129	75	83	52	70	109	83	116	106
macs2_2.9e9_minus_peak_1682	chr1	27744603	27744896	-	294	35	17	34	30	16	18	12	4	15	26	14	15
macs2_2.9e9_minus_peak_1683	chr1	27745278	27745587	-	310	35	13	37	28	16	10	17	9	16	16	12	13
macs2_2.9e9_minus_peak_1684	chr1	27751506	27751753	-	248	21	19	21	19	4	12	15	10	14	10	9	6
macs2_2.9e9_minus_peak_1685	chr1	27755388	27755892	-	505	24	18	11	20	9	17	9	13	44	45	37	50
macs2_2.9e9_minus_peak_1686	chr1	27761343	27761610	-	268	3	1	3	0	2	0	0	0	8	1	7	9
macs2_2.9e9_minus_peak_1687	chr1	27772220	27772546	-	327	2	8	3	4	1	2	1	2	9	5	4	6
macs2_2.9e9_minus_peak_1688	chr1	27780606	27780962	-	357	11	4	7	8	5	2	9	8	11	9	23	18
macs2_2.9e9_minus_peak_1689	chr1	27782102	27782376	-	275	8	17	9	12	11	8	6	3	30	17	25	22
macs2_2.9e9_minus_peak_1690	chr1	27783152	27783367	-	216	6	13	19	14	8	12	10	9	24	27	19	15
macs2_2.9e9_minus_peak_1691	chr1	27787606	27787828	-	223	5	8	6	5	8	4	0	4	4	3	3	6
macs2_2.9e9_minus_peak_1692	chr1	27789219	27789450	-	232	6	7	1	14	0	9	2	1	28	9	17	10
macs2_2.9e9_minus_peak_1693	chr1	27791452	27791707	-	256	15	10	5	5	6	5	5	4	8	20	16	13
macs2_2.9e9_minus_peak_1694	chr1	27792716	27792915	-	200	4	5	4	6	1	4	0	4	6	7	6	1
macs2_2.9e9_minus_peak_1695	chr1	27794339	27794598	-	260	3	3	7	4	1	3	5	1	6	6	10	5
macs2_2.9e9_minus_peak_1696	chr1	27800670	27800871	-	202	2	8	1	2	1	0	0	1	2	1	9	5
macs2_2.9e9_minus_peak_1697	chr1	27801297	27801498	-	202	1	1	1	1	0	2	0	2	2	1	5	2
macs2_2.9e9_minus_peak_1698	chr1	27801888	27802163	-	276	1	1	2	1	1	3	1	0	3	1	6	2
macs2_2.9e9_minus_peak_1699	chr1	27807715	27807918	-	204	2	1	5	2	1	1	2	1	0	5	1	2
macs2_2.9e9_minus_peak_1700	chr1	27808467	27808667	-	201	1	0	2	2	0	1	0	2	1	2	3	5
macs2_2.9e9_minus_peak_1701	chr1	27814586	27814863	-	278	15	14	7	12	6	10	3	5	23	16	16	17
macs2_2.9e9_minus_peak_1702	chr1	27824343	27824542	-	200	1	1	0	1	0	0	0	0	1	0	1	0
macs2_2.9e9_minus_peak_1703	chr1	27826633	27827162	-	530	3	0	5	2	2	0	2	3	2	2	2	1
macs2_2.9e9_minus_peak_1704	chr1	27860633	27861288	-	656	377	477	267	362	152	196	201	206	385	308	331	269
macs2_2.9e9_minus_peak_1705	chr1	27865551	27865770	-	220	10	11	15	6	9	11	6	8	14	5	8	14
macs2_2.9e9_minus_peak_1706	chr1	27867758	27867983	-	226	8	1	4	1	3	1	2	5	5	1	3	4
macs2_2.9e9_minus_peak_1707	chr1	27872729	27873073	-	345	23	7	7	10	6	5	6	8	10	7	4	4
macs2_2.9e9_minus_peak_1708	chr1	27878789	27879144	-	356	13	8	6	12	8	9	13	8	13	7	6	7
macs2_2.9e9_minus_peak_1709	chr1	27885614	27885817	-	204	1	1	0	1	2	3	1	0	5	0	2	0
macs2_2.9e9_minus_peak_1710	chr1	27886601	27886800	-	200	0	0	1	0	1	1	0	0	1	1	0	0
macs2_2.9e9_minus_peak_1711	chr1	27905053	27905284	-	232	5	4	3	3	1	2	1	6	7	2	1	4
macs2_2.9e9_minus_peak_1712	chr1	27905449	27905889	-	441	24	19	23	21	9	7	10	9	24	17	20	27
macs2_2.9e9_minus_peak_1713	chr1	27910954	27911153	-	200	0	1	1	3	0	1	1	3	0	1	0	0
macs2_2.9e9_minus_peak_1714	chr1	27924267	27924591	-	325	9	5	2	5	3	0	0	0	1	2	0	3
macs2_2.9e9_minus_peak_1715	chr1	27929077	27929303	-	227	2	3	4	3	1	2	2	2	8	2	11	7
macs2_2.9e9_minus_peak_1716	chr1	27984962	27985229	-	268	1	2	3	6	5	3	1	3	5	9	7	3
macs2_2.9e9_minus_peak_1717	chr1	27992433	27992865	-	433	72	92	17	39	19	31	13	24	24	33	37	23
macs2_2.9e9_minus_peak_1718	chr1	27997796	27998056	-	261	4	2	0	1	0	0	1	0	0	2	4	3
macs2_2.9e9_minus_peak_1719	chr1	28004151	28004358	-	208	2	6	5	1	3	4	2	1	6	7	1	2
macs2_2.9e9_minus_peak_1720	chr1	28005184	28005390	-	207	0	0	4	1	0	1	0	0	4	1	1	1
macs2_2.9e9_minus_peak_1721	chr1	28005640	28005909	-	270	12	16	14	10	1	10	5	7	13	6	14	11
macs2_2.9e9_minus_peak_1722	chr1	28051283	28051484	-	202	0	1	2	0	0	0	0	0	2	1	2	2
macs2_2.9e9_minus_peak_1723	chr1	28156647	28157086	-	440	5	1	2	5	1	1	0	0	2	2	1	2
macs2_2.9e9_minus_peak_1724	chr1	28171259	28171459	-	201	1	1	0	0	1	0	0	1	0	0	3	0
macs2_2.9e9_minus_peak_1725	chr1	28172147	28172348	-	202	0	0	0	0	0	0	1	1	2	1	1	0
macs2_2.9e9_minus_peak_1726	chr1	28205151	28205355	-	205	1	1	0	1	0	0	0	0	4	4	1	5
macs2_2.9e9_minus_peak_1727	chr1	28217914	28218501	-	588	1173	944	974	1069	477	708	540	705	1177	1150	995	1050
macs2_2.9e9_minus_peak_1728	chr1	28221206	28221599	-	394	69	63	37	66	20	31	32	23	53	39	42	36
macs2_2.9e9_minus_peak_1729	chr1	28222630	28222958	-	329	72	70	54	70	28	37	49	45	75	38	67	55
macs2_2.9e9_minus_peak_1730	chr1	28224965	28225194	-	230	26	31	19	25	13	24	23	14	33	19	31	30
macs2_2.9e9_minus_peak_1731	chr1	28226909	28227170	-	262	16	11	12	12	6	5	7	9	3	6	11	8
macs2_2.9e9_minus_peak_1732	chr1	28228672	28228887	-	216	7	12	8	6	2	11	4	13	13	7	7	5
macs2_2.9e9_minus_peak_1733	chr1	28231058	28231324	-	267	8	8	19	20	4	11	10	8	9	7	14	5
macs2_2.9e9_minus_peak_1734	chr1	28232043	28232244	-	202	11	5	4	10	8	1	2	5	1	1	6	8
macs2_2.9e9_minus_peak_1735	chr1	28233217	28233417	-	201	5	4	7	9	0	1	7	3	1	2	3	5
macs2_2.9e9_minus_peak_1736	chr1	28234252	28234488	-	237	7	2	5	17	3	2	5	6	8	3	5	5
macs2_2.9e9_minus_peak_1737	chr1	28240404	28240648	-	245	13	7	18	7	11	8	11	11	13	15	19	15
macs2_2.9e9_minus_peak_1738	chr1	28240752	28241079	-	328	28	15	32	22	16	9	11	10	23	27	42	21
macs2_2.9e9_minus_peak_1739	chr1	28278856	28279055	-	200	1	1	1	0	2	0	0	0	0	1	1	1
macs2_2.9e9_minus_peak_1740	chr1	28285520	28285870	-	351	6	4	12	4	2	2	0	3	2	3	9	5
macs2_2.9e9_minus_peak_1741	chr1	28296720	28297303	-	584	1124	1276	528	800	409	558	447	526	711	534	627	606
macs2_2.9e9_minus_peak_1742	chr1	28300462	28300767	-	306	33	16	9	21	8	10	11	10	14	15	23	13
macs2_2.9e9_minus_peak_1743	chr1	28310807	28311526	-	720	37	32	9	24	10	9	11	12	19	16	9	14
macs2_2.9e9_minus_peak_1744	chr1	28314865	28315152	-	288	17	18	43	31	17	21	15	13	16	3	13	13
macs2_2.9e9_minus_peak_1745	chr1	28316959	28317575	-	617	19	20	12	21	10	11	6	13	6	9	11	9
macs2_2.9e9_minus_peak_1746	chr1	28333109	28333572	-	464	49	41	25	35	16	27	14	22	34	22	32	18
macs2_2.9e9_minus_peak_1747	chr1	28333755	28333973	-	219	18	17	3	9	4	4	5	5	17	5	11	6
macs2_2.9e9_minus_peak_1748	chr1	28334494	28334860	-	367	65	112	54	58	28	47	29	39	39	43	34	27
macs2_2.9e9_minus_peak_1749	chr1	28335273	28335518	-	246	14	9	2	8	4	5	3	9	6	4	5	5
macs2_2.9e9_minus_peak_1750	chr1	28337306	28337509	-	204	21	10	14	6	7	11	5	9	8	9	6	5
macs2_2.9e9_minus_peak_1751	chr1	28346094	28346375	-	282	10	9	5	6	3	8	3	4	9	16	3	7
macs2_2.9e9_minus_peak_1752	chr1	28347763	28348275	-	513	11	14	6	21	2	11	10	5	8	7	10	8
macs2_2.9e9_minus_peak_1753	chr1	28351073	28351276	-	204	6	5	6	7	2	2	2	3	10	2	0	8
macs2_2.9e9_minus_peak_1754	chr1	28354960	28355747	-	788	66	68	47	56	36	40	32	48	80	45	79	53
macs2_2.9e9_minus_peak_1755	chr1	28358256	28358643	-	388	74	73	69	76	26	44	33	39	54	60	55	67
macs2_2.9e9_minus_peak_1756	chr1	28360063	28360288	-	226	11	10	5	18	1	8	9	4	17	4	2	7
macs2_2.9e9_minus_peak_1757	chr1	28365869	28366156	-	288	0	5	5	6	3	2	5	1	6	0	4	0
macs2_2.9e9_minus_peak_1758	chr1	28368081	28368324	-	244	14	4	13	9	3	3	6	7	8	2	2	8
macs2_2.9e9_minus_peak_1759	chr1	28371201	28371400	-	200	4	5	3	2	1	3	2	0	1	1	9	1
macs2_2.9e9_minus_peak_1760	chr1	28373249	28373607	-	359	58	53	48	50	25	30	23	39	41	38	41	52
macs2_2.9e9_minus_peak_1761	chr1	28374075	28374274	-	200	10	6	6	6	3	2	2	6	8	4	6	9
macs2_2.9e9_minus_peak_1762	chr1	28376606	28376866	-	261	10	9	13	12	4	4	6	16	14	5	7	7
macs2_2.9e9_minus_peak_1763	chr1	28377133	28377493	-	361	9	11	8	10	3	6	6	8	10	9	6	9
macs2_2.9e9_minus_peak_1764	chr1	28378080	28378381	-	302	32	24	26	25	9	9	25	20	43	24	15	12
macs2_2.9e9_minus_peak_1765	chr1	28381869	28382092	-	224	12	7	7	14	3	11	10	6	12	5	8	7
macs2_2.9e9_minus_peak_1766	chr1	28382475	28382723	-	249	3	5	17	14	1	6	4	7	16	4	4	6
macs2_2.9e9_minus_peak_1767	chr1	28389718	28389991	-	274	45	26	21	21	12	26	17	28	26	25	25	35
macs2_2.9e9_minus_peak_1768	chr1	28391057	28391260	-	204	9	7	4	4	3	7	5	6	6	5	5	7
macs2_2.9e9_minus_peak_1769	chr1	28392039	28392240	-	202	7	12	7	3	3	3	2	5	12	7	6	3
macs2_2.9e9_minus_peak_1770	chr1	28394934	28395358	-	425	31	30	40	36	12	24	17	17	57	36	33	29
macs2_2.9e9_minus_peak_1771	chr1	28397953	28398236	-	284	6	9	6	6	1	3	9	2	12	7	12	3
macs2_2.9e9_minus_peak_1772	chr1	28399571	28400016	-	446	28	25	25	32	13	14	19	16	19	13	21	22
macs2_2.9e9_minus_peak_1773	chr1	28400925	28401210	-	286	18	34	20	19	14	17	7	14	35	21	22	27
macs2_2.9e9_minus_peak_1774	chr1	28402298	28402497	-	200	15	8	3	7	6	8	4	4	12	10	6	5
macs2_2.9e9_minus_peak_1775	chr1	28403527	28403769	-	243	7	6	3	9	7	6	1	6	8	9	9	8
macs2_2.9e9_minus_peak_1776	chr1	28404956	28405283	-	328	9	9	10	11	6	7	5	5	15	9	11	8
macs2_2.9e9_minus_peak_1777	chr1	28406200	28406437	-	238	24	16	20	20	15	8	14	13	17	22	21	24
macs2_2.9e9_minus_peak_1778	chr1	28411816	28412078	-	263	11	8	3	7	5	5	3	3	10	7	5	2
macs2_2.9e9_minus_peak_1779	chr1	28412629	28412977	-	349	64	56	45	53	22	35	43	36	76	55	48	50
macs2_2.9e9_minus_peak_1780	chr1	28414869	28415104	-	236	79	60	60	51	37	41	45	26	47	35	53	53
macs2_2.9e9_minus_peak_1781	chr1	28415385	28415683	-	299	0	5	7	3	8	4	3	4	7	3	12	6
macs2_2.9e9_minus_peak_1782	chr1	28421418	28422535	-	1118	173	204	132	129	75	119	96	89	153	88	154	109
macs2_2.9e9_minus_peak_1783	chr1	28473546	28473846	-	301	3	3	0	4	1	1	2	1	3	9	10	7
macs2_2.9e9_minus_peak_1784	chr1	28507389	28507603	-	215	9	0	5	4	3	4	6	3	12	7	19	10
macs2_2.9e9_minus_peak_1785	chr1	28507715	28507948	-	234	4	2	3	0	1	0	0	0	4	2	3	5
macs2_2.9e9_minus_peak_1786	chr1	28510495	28510697	-	203	4	3	0	0	1	0	1	0	2	2	4	2
macs2_2.9e9_minus_peak_1787	chr1	28526710	28527842	-	1133	1253	1106	1139	1218	541	881	662	855	1231	1035	926	1047
macs2_2.9e9_minus_peak_1788	chr1	28531641	28531845	-	205	98	120	104	119	73	80	68	95	139	96	171	94
macs2_2.9e9_minus_peak_1789	chr1	28534673	28535024	-	352	208	258	217	244	141	171	133	153	264	199	300	180
macs2_2.9e9_minus_peak_1790	chr1	28536308	28536575	-	268	239	251	216	283	157	157	132	154	236	194	287	195
macs2_2.9e9_minus_peak_1791	chr1	28536903	28537137	-	235	345	294	221	294	167	163	153	208	250	286	296	271
macs2_2.9e9_minus_peak_1792	chr1	28541271	28541486	-	216	316	276	209	261	148	172	142	203	258	301	268	258
macs2_2.9e9_minus_peak_1793	chr1	28542325	28542543	-	219	3	1	9	5	1	6	4	2	5	3	6	1
macs2_2.9e9_minus_peak_1794	chr1	28553523	28553783	-	261	8	15	6	13	8	9	8	4	10	13	7	24
macs2_2.9e9_minus_peak_1795	chr1	28555252	28555521	-	270	321	310	238	326	163	207	139	218	239	299	282	312
macs2_2.9e9_minus_peak_1796	chr1	28556466	28556679	-	214	24	24	13	15	8	16	5	10	10	16	23	19
macs2_2.9e9_minus_peak_1797	chr1	28559253	28559529	-	277	810	768	469	683	306	380	256	416	420	544	456	526
macs2_2.9e9_minus_peak_1798	chr1	28561758	28562008	-	251	10	7	10	4	6	14	5	4	13	19	12	15
macs2_2.9e9_minus_peak_1799	chr1	28565904	28566303	-	400	208	179	123	147	37	60	53	79	141	132	96	110
macs2_2.9e9_minus_peak_1800	chr1	28566510	28566821	-	312	17	13	7	12	2	1	1	4	12	5	3	9
macs2_2.9e9_minus_peak_1801	chr1	28569834	28570095	-	262	14	24	16	17	6	11	13	17	12	11	14	18
macs2_2.9e9_minus_peak_1802	chr1	28577895	28578361	-	467	17	11	27	18	23	20	18	28	58	23	26	38
macs2_2.9e9_minus_peak_1803	chr1	28582396	28582599	-	204	1	4	2	6	2	3	0	0	3	1	4	3
macs2_2.9e9_minus_peak_1804	chr1	28583147	28583368	-	222	3	1	3	2	0	5	2	0	3	0	2	0
macs2_2.9e9_minus_peak_1805	chr1	28646166	28646378	-	213	2	6	0	3	6	1	0	3	4	0	3	0
macs2_2.9e9_minus_peak_1806	chr1	28654348	28654736	-	389	5	5	3	7	2	4	5	3	6	2	4	3
macs2_2.9e9_minus_peak_1807	chr1	28654828	28655415	-	588	20	11	8	19	15	12	10	4	11	5	10	9
macs2_2.9e9_minus_peak_1808	chr1	28661462	28661664	-	203	0	0	1	0	0	0	2	0	3	0	3	0
macs2_2.9e9_minus_peak_1809	chr1	28667387	28667641	-	255	5	5	8	7	6	4	4	3	11	6	7	3
macs2_2.9e9_minus_peak_1810	chr1	28672464	28672843	-	380	13	7	22	7	19	18	10	12	28	14	13	14
macs2_2.9e9_minus_peak_1811	chr1	28699683	28700061	-	379	0	0	4	0	5	4	1	6	3	4	1	3
macs2_2.9e9_minus_peak_1812	chr1	28722165	28722410	-	246	1	0	0	0	1	1	0	0	0	0	1	1
macs2_2.9e9_minus_peak_1813	chr1	28723208	28723425	-	218	0	3	1	0	0	2	1	2	1	0	1	1
macs2_2.9e9_minus_peak_1814	chr1	28727670	28727889	-	220	12	15	3	3	3	3	7	1	7	4	4	4
macs2_2.9e9_minus_peak_1815	chr1	28751521	28751785	-	265	2	1	0	5	1	0	0	1	2	3	0	1
macs2_2.9e9_minus_peak_1816	chr1	28759284	28759545	-	262	1	0	2	1	3	0	2	2	0	1	0	1
macs2_2.9e9_minus_peak_1817	chr1	28762704	28762906	-	203	0	0	1	0	2	0	1	3	1	2	2	1
macs2_2.9e9_minus_peak_1818	chr1	28818266	28818502	-	237	0	2	3	5	0	1	0	1	4	3	2	2
macs2_2.9e9_minus_peak_1819	chr1	28822952	28823162	-	211	3	1	1	0	0	3	0	0	5	4	3	4
macs2_2.9e9_minus_peak_1820	chr1	28827241	28827440	-	200	1	2	3	1	2	1	1	1	3	1	1	1
macs2_2.9e9_minus_peak_1821	chr1	28831593	28832027	-	435	29	25	21	23	13	16	12	13	20	15	18	15
macs2_2.9e9_minus_peak_1822	chr1	28832130	28832353	-	224	8	5	6	8	4	3	4	4	14	1	5	6
macs2_2.9e9_minus_peak_1823	chr1	28832612	28832928	-	317	5	5	4	6	19	25	4	1	6	3	4	5
macs2_2.9e9_minus_peak_1824	chr1	28860209	28860434	-	226	9	3	6	7	2	3	0	4	3	4	1	1
macs2_2.9e9_minus_peak_1825	chr1	28878346	28878598	-	253	3	0	1	0	1	1	1	3	6	3	1	1
macs2_2.9e9_minus_peak_1826	chr1	28879157	28879396	-	240	10	8	1	3	5	9	2	5	13	3	11	9
macs2_2.9e9_minus_peak_1827	chr1	28898972	28899171	-	200	1	0	0	1	0	5	0	3	10	3	0	8
macs2_2.9e9_minus_peak_1828	chr1	28904920	28905252	-	333	301	333	205	238	164	160	212	213	422	365	432	424
macs2_2.9e9_minus_peak_1829	chr1	28905876	28906469	-	594	315	321	161	194	87	111	140	124	300	259	178	252
macs2_2.9e9_minus_peak_1830	chr1	28906799	28907128	-	330	72	34	30	31	43	53	30	38	52	43	50	56
macs2_2.9e9_minus_peak_1831	chr1	28907443	28907668	-	226	26	10	14	7	4	8	4	2	13	18	5	22
macs2_2.9e9_minus_peak_1832	chr1	28913325	28913620	-	296	9	5	6	6	2	3	0	4	4	2	3	3
macs2_2.9e9_minus_peak_1833	chr1	28914192	28914391	-	200	3	1	0	0	3	0	2	1	0	0	0	0
macs2_2.9e9_minus_peak_1834	chr1	28923434	28924231	-	798	17	16	3	7	3	4	3	3	6	1	5	4
macs2_2.9e9_minus_peak_1835	chr1	28929475	28930043	-	569	367	302	269	292	155	205	147	187	300	280	316	257
macs2_2.9e9_minus_peak_1836	chr1	28936393	28936593	-	201	2	7	1	2	5	4	3	1	4	1	1	2
macs2_2.9e9_minus_peak_1837	chr1	28939586	28939840	-	255	4	4	2	2	5	3	6	0	2	2	3	2
macs2_2.9e9_minus_peak_1838	chr1	28944921	28945299	-	379	10	6	5	7	3	6	1	3	2	5	2	5
macs2_2.9e9_minus_peak_1839	chr1	28953382	28953698	-	317	18	8	2	5	3	6	1	5	11	10	16	10
macs2_2.9e9_minus_peak_1840	chr1	28956199	28956692	-	494	9	8	7	9	5	9	5	5	21	16	15	20
macs2_2.9e9_minus_peak_1841	chr1	28961591	28961844	-	254	15	9	7	10	4	6	10	3	11	19	13	4
macs2_2.9e9_minus_peak_1842	chr1	28963656	28963876	-	221	5	8	3	4	2	5	2	0	15	10	11	9
macs2_2.9e9_minus_peak_1843	chr1	28964075	28964415	-	341	33	50	27	41	16	23	17	16	42	42	49	38
macs2_2.9e9_minus_peak_1844	chr1	28965213	28965427	-	215	19	13	19	17	9	12	11	10	40	15	38	20
macs2_2.9e9_minus_peak_1845	chr1	28969377	28969588	-	212	16	5	13	2	3	9	1	6	13	6	7	6
macs2_2.9e9_minus_peak_1846	chr1	29062420	29062875	-	456	4	4	2	6	3	1	2	4	13	3	2	5
macs2_2.9e9_minus_peak_1847	chr1	29063976	29064178	-	203	2	0	0	0	1	0	1	0	2	3	8	0
macs2_2.9e9_minus_peak_1848	chr1	29073967	29074225	-	259	6	5	10	8	4	5	2	0	4	7	6	6
macs2_2.9e9_minus_peak_1849	chr1	29110767	29110966	-	200	0	1	0	0	1	0	0	1	1	1	2	3
macs2_2.9e9_minus_peak_1850	chr1	29119929	29120160	-	232	0	0	0	0	2	0	1	1	1	3	2	0
macs2_2.9e9_minus_peak_1851	chr1	29196618	29196846	-	229	0	1	0	4	1	0	1	1	2	3	1	0
macs2_2.9e9_minus_peak_1852	chr1	29198098	29198307	-	210	0	1	2	1	0	3	1	0	0	5	2	0
macs2_2.9e9_minus_peak_1853	chr1	29225289	29225488	-	200	0	0	0	0	1	0	0	1	5	0	4	0
macs2_2.9e9_minus_peak_1854	chr1	29258142	29258341	-	200	1	2	1	0	0	0	1	1	0	1	1	0
macs2_2.9e9_minus_peak_1855	chr1	29298330	29298530	-	201	1	0	0	0	2	0	1	2	7	0	2	0
macs2_2.9e9_minus_peak_1856	chr1	29308663	29309156	-	494	196	94	125	88	37	91	60	80	109	106	9	85
macs2_2.9e9_minus_peak_1857	chr1	29342645	29342969	-	325	0	5	1	3	5	1	0	1	1	2	0	3
macs2_2.9e9_minus_peak_1858	chr1	29445798	29446097	-	300	25	26	34	70	21	21	12	23	45	38	30	28
macs2_2.9e9_minus_peak_1859	chr1	29474153	29474853	-	701	1381	1245	1026	1188	382	613	586	704	696	599	316	680
macs2_2.9e9_minus_peak_1860	chr1	29475106	29475780	-	675	522	257	378	330	198	216	197	221	277	241	253	197
macs2_2.9e9_minus_peak_1861	chr1	29476461	29476665	-	205	118	58	97	77	64	63	62	60	73	63	79	45
macs2_2.9e9_minus_peak_1862	chr1	29480021	29480226	-	206	28	24	16	21	18	15	15	15	17	11	14	26
macs2_2.9e9_minus_peak_1863	chr1	29481032	29481395	-	364	124	102	71	99	36	36	58	62	52	58	47	43
macs2_2.9e9_minus_peak_1864	chr1	29485716	29485951	-	236	41	25	16	28	6	4	6	11	13	8	10	6
macs2_2.9e9_minus_peak_1865	chr1	29486461	29486963	-	503	20	16	14	26	2	11	9	4	6	5	6	6
macs2_2.9e9_minus_peak_1866	chr1	29488036	29488263	-	228	6	6	1	3	1	8	2	3	5	5	8	3
macs2_2.9e9_minus_peak_1867	chr1	29493796	29494051	-	256	27	30	22	34	10	25	14	20	42	25	37	30
macs2_2.9e9_minus_peak_1868	chr1	29494305	29495018	-	714	215	219	183	220	181	205	139	152	414	212	362	266
macs2_2.9e9_minus_peak_1869	chr1	29497041	29497245	-	205	36	17	14	8	13	8	14	7	29	22	29	14
macs2_2.9e9_minus_peak_1870	chr1	29498707	29499030	-	324	101	91	84	125	68	97	69	73	170	123	147	121
macs2_2.9e9_minus_peak_1871	chr1	29499581	29500135	-	555	117	107	94	103	71	90	52	82	165	114	183	157
macs2_2.9e9_minus_peak_1872	chr1	29503719	29503977	-	259	34	36	26	38	23	23	20	23	88	57	60	47
macs2_2.9e9_minus_peak_1873	chr1	29504311	29505417	-	1107	244	178	237	210	130	170	130	183	391	300	332	293
macs2_2.9e9_minus_peak_1874	chr1	29510292	29510494	-	203	7	6	3	5	5	3	2	3	11	12	7	10
macs2_2.9e9_minus_peak_1875	chr1	29519255	29519682	-	428	81	75	92	89	45	55	36	67	102	80	112	83
macs2_2.9e9_minus_peak_1876	chr1	29520202	29520624	-	423	208	161	168	144	88	104	103	131	127	105	89	116
macs2_2.9e9_minus_peak_1877	chr1	29525012	29525253	-	242	20	22	8	23	12	18	15	12	21	10	22	14
macs2_2.9e9_minus_peak_1878	chr1	29525636	29525858	-	223	8	2	8	21	4	3	3	3	4	6	10	4
macs2_2.9e9_minus_peak_1879	chr1	29526016	29526324	-	309	44	39	19	31	16	31	9	23	27	43	37	20
macs2_2.9e9_minus_peak_1880	chr1	29528028	29528286	-	259	14	14	10	11	9	5	8	6	4	3	11	4
macs2_2.9e9_minus_peak_1881	chr1	29533542	29533758	-	217	7	1	3	6	4	0	1	1	4	3	6	7
macs2_2.9e9_minus_peak_1882	chr1	29536440	29536657	-	218	3	9	12	11	6	7	3	2	5	11	7	6
macs2_2.9e9_minus_peak_1883	chr1	29537501	29537791	-	291	29	14	7	15	13	5	11	14	18	17	19	18
macs2_2.9e9_minus_peak_1884	chr1	29538814	29539094	-	281	9	7	5	6	3	3	5	4	18	15	8	11
macs2_2.9e9_minus_peak_1885	chr1	29539844	29540047	-	204	7	11	7	9	6	4	1	1	7	12	15	13
macs2_2.9e9_minus_peak_1886	chr1	29540487	29540699	-	213	17	9	6	11	11	8	4	7	6	12	6	5
macs2_2.9e9_minus_peak_1887	chr1	29548518	29549150	-	633	11	10	2	15	8	7	3	4	13	13	11	8
macs2_2.9e9_minus_peak_1888	chr1	29553367	29553645	-	279	20	10	14	5	3	6	4	5	12	11	13	9
macs2_2.9e9_minus_peak_1889	chr1	29554744	29555322	-	579	14	18	22	29	16	18	8	10	19	13	28	15
macs2_2.9e9_minus_peak_1890	chr1	29555507	29555829	-	323	3	2	3	11	3	5	0	6	13	6	5	3
macs2_2.9e9_minus_peak_1891	chr1	29584447	29584646	-	200	1	0	0	0	1	0	0	0	0	0	1	1
macs2_2.9e9_minus_peak_1892	chr1	30664443	30664646	-	204	1	0	2	2	2	1	1	3	1	1	1	0
macs2_2.9e9_minus_peak_1893	chr1	31185960	31186228	-	269	5	4	4	7	4	4	3	10	9	7	8	12
macs2_2.9e9_minus_peak_1894	chr1	31190355	31190795	-	441	124	61	241	155	91	103	112	113	125	88	100	115
macs2_2.9e9_minus_peak_1895	chr1	31263100	31263463	-	364	0	0	1	2	0	2	1	2	0	0	2	3
macs2_2.9e9_minus_peak_1896	chr1	31284499	31284740	-	242	0	2	3	0	3	2	0	0	2	0	0	2
macs2_2.9e9_minus_peak_1897	chr1	31342215	31342852	-	638	83	99	66	81	29	48	38	62	74	78	39	71
macs2_2.9e9_minus_peak_1898	chr1	31345331	31345744	-	414	6	4	8	11	7	9	5	8	6	8	5	8
macs2_2.9e9_minus_peak_1899	chr1	31375720	31375927	-	208	4	1	2	1	2	0	0	0	13	2	11	2
macs2_2.9e9_minus_peak_1900	chr1	31377186	31377630	-	445	54	105	39	77	46	45	37	44	103	66	97	67
macs2_2.9e9_minus_peak_1901	chr1	31404244	31405383	-	1140	1072	915	647	725	360	463	412	492	814	602	691	631
macs2_2.9e9_minus_peak_1902	chr1	31405483	31406134	-	652	973	893	572	773	350	496	420	458	784	632	613	710
macs2_2.9e9_minus_peak_1903	chr1	31411835	31412393	-	559	132	138	105	128	64	79	50	75	115	67	81	77
macs2_2.9e9_minus_peak_1904	chr1	31412634	31412912	-	279	82	56	55	61	18	33	28	32	53	34	38	35
macs2_2.9e9_minus_peak_1905	chr1	31416791	31417143	-	353	70	50	42	50	22	22	20	30	42	27	36	25
macs2_2.9e9_minus_peak_1906	chr1	31420605	31420869	-	265	161	111	114	121	77	60	87	80	109	87	97	80
macs2_2.9e9_minus_peak_1907	chr1	31421457	31421892	-	436	30	12	21	13	9	17	14	7	11	12	15	11
macs2_2.9e9_minus_peak_1908	chr1	31431529	31431899	-	371	13	5	9	8	4	4	9	10	11	15	6	12
macs2_2.9e9_minus_peak_1909	chr1	31432898	31433631	-	734	57	40	24	24	20	43	24	27	129	124	125	130
macs2_2.9e9_minus_peak_1910	chr1	31435169	31435368	-	200	10	5	8	6	8	5	4	4	23	10	9	10
macs2_2.9e9_minus_peak_1911	chr1	31438324	31438523	-	200	10	4	3	3	3	2	4	2	2	4	2	7
macs2_2.9e9_minus_peak_1912	chr1	31439082	31439602	-	521	15	14	18	14	6	11	7	11	18	9	5	7
macs2_2.9e9_minus_peak_1913	chr1	31442399	31442842	-	444	14	7	10	11	6	7	4	5	8	11	9	11
macs2_2.9e9_minus_peak_1914	chr1	31446488	31446692	-	205	8	9	5	7	6	5	2	3	3	1	2	8
macs2_2.9e9_minus_peak_1915	chr1	31448086	31448644	-	559	64	49	36	43	30	33	34	40	52	34	29	40
macs2_2.9e9_minus_peak_1916	chr1	31454323	31454743	-	421	143	120	79	139	57	61	56	66	102	97	94	104
macs2_2.9e9_minus_peak_1917	chr1	31455690	31455920	-	231	104	87	79	87	35	47	48	42	81	78	82	79
macs2_2.9e9_minus_peak_1918	chr1	31456347	31456952	-	606	69	65	43	59	19	23	19	28	55	44	46	42
macs2_2.9e9_minus_peak_1919	chr1	31459961	31460165	-	205	2	6	3	4	1	2	3	1	10	2	7	5
macs2_2.9e9_minus_peak_1920	chr1	31467911	31468566	-	656	364	390	247	335	204	247	215	274	387	235	428	304
macs2_2.9e9_minus_peak_1921	chr1	31470225	31470651	-	427	145	135	134	106	63	99	57	79	145	77	111	100
macs2_2.9e9_minus_peak_1922	chr1	31471738	31472029	-	292	55	28	26	25	14	20	19	14	22	12	23	26
macs2_2.9e9_minus_peak_1923	chr1	31478286	31478861	-	576	463	390	325	344	232	289	248	332	455	341	520	387
macs2_2.9e9_minus_peak_1924	chr1	31479671	31479905	-	235	26	26	18	24	8	7	2	10	10	29	14	14
macs2_2.9e9_minus_peak_1925	chr1	31490269	31490791	-	523	317	258	211	207	99	114	128	159	200	173	166	165
macs2_2.9e9_minus_peak_1926	chr1	31492083	31492366	-	284	37	24	29	20	11	18	8	17	18	9	14	21
macs2_2.9e9_minus_peak_1927	chr1	31492683	31492891	-	209	19	22	11	15	11	11	2	7	19	16	11	8
macs2_2.9e9_minus_peak_1928	chr1	31493141	31493405	-	265	13	9	13	11	5	10	6	6	27	19	24	15
macs2_2.9e9_minus_peak_1929	chr1	31497825	31498548	-	724	72	65	75	68	23	50	30	34	44	36	30	51
macs2_2.9e9_minus_peak_1930	chr1	31499020	31499405	-	386	75	106	61	75	37	34	38	41	51	40	49	38
macs2_2.9e9_minus_peak_1931	chr1	31501437	31501639	-	203	5	3	0	2	1	3	2	5	5	5	2	1
macs2_2.9e9_minus_peak_1932	chr1	31504486	31504750	-	265	10	6	10	10	3	2	2	3	15	3	7	7
macs2_2.9e9_minus_peak_1933	chr1	31505992	31506651	-	660	17	14	7	9	5	5	8	8	13	10	13	9
macs2_2.9e9_minus_peak_1934	chr1	31511727	31512165	-	439	58	30	46	46	30	38	35	25	69	42	53	39
macs2_2.9e9_minus_peak_1935	chr1	31515344	31515811	-	468	137	155	114	124	70	85	54	93	152	126	135	95
macs2_2.9e9_minus_peak_1936	chr1	31516089	31516331	-	243	6	12	14	4	11	9	3	3	4	10	7	9
macs2_2.9e9_minus_peak_1937	chr1	31519211	31519466	-	256	26	31	27	29	18	14	24	7	34	27	35	27
macs2_2.9e9_minus_peak_1938	chr1	31524056	31524256	-	201	23	18	15	11	12	14	11	15	26	11	25	12
macs2_2.9e9_minus_peak_1939	chr1	31525147	31525728	-	582	176	114	109	100	81	65	80	75	137	102	109	94
macs2_2.9e9_minus_peak_1940	chr1	31529369	31529708	-	340	140	118	135	120	48	86	52	86	143	109	79	107
macs2_2.9e9_minus_peak_1941	chr1	31531714	31532122	-	409	22	13	14	9	8	13	5	13	17	16	8	8
macs2_2.9e9_minus_peak_1942	chr1	31538341	31538548	-	208	3	5	5	1	2	1	1	6	3	1	3	4
macs2_2.9e9_minus_peak_1943	chr1	31567279	31567490	-	212	15	25	16	21	12	19	13	12	22	12	18	15
macs2_2.9e9_minus_peak_1944	chr1	31627019	31627279	-	261	3	2	1	1	0	0	0	1	1	2	2	0
macs2_2.9e9_minus_peak_1945	chr1	31651912	31652335	-	424	6	7	9	20	11	8	8	5	13	7	10	4
macs2_2.9e9_minus_peak_1946	chr1	31652457	31652745	-	289	10	7	20	19	19	10	13	9	11	10	6	11
macs2_2.9e9_minus_peak_1947	chr1	31667845	31668117	-	273	0	3	1	4	1	1	1	1	3	3	0	0
macs2_2.9e9_minus_peak_1948	chr1	31685213	31685412	-	200	1	0	3	0	0	0	0	0	7	0	6	1
macs2_2.9e9_minus_peak_1949	chr1	31685804	31686108	-	305	2	0	3	0	0	1	0	1	11	4	6	6
macs2_2.9e9_minus_peak_1950	chr1	31692898	31693118	-	221	0	1	1	0	3	1	1	2	0	1	0	1
macs2_2.9e9_minus_peak_1951	chr1	31696213	31696418	-	206	3	0	1	1	3	0	1	1	4	2	5	1
macs2_2.9e9_minus_peak_1952	chr1	31698105	31698327	-	223	1	0	2	1	3	2	0	2	12	5	11	4
macs2_2.9e9_minus_peak_1953	chr1	31702286	31702554	-	269	4	2	3	4	0	4	5	1	9	6	11	13
macs2_2.9e9_minus_peak_1954	chr1	31704067	31704267	-	201	1	2	0	1	0	3	3	0	9	6	3	1
macs2_2.9e9_minus_peak_1955	chr1	31704684	31705056	-	373	3	3	7	0	4	2	2	1	8	3	2	5
macs2_2.9e9_minus_peak_1956	chr1	31710579	31710855	-	277	1	0	0	1	2	0	0	0	4	1	0	1
macs2_2.9e9_minus_peak_1957	chr1	31732297	31732876	-	580	380	337	344	343	183	324	196	270	412	323	283	295
macs2_2.9e9_minus_peak_1958	chr1	31736069	31736429	-	361	89	118	82	89	36	52	66	69	44	47	43	59
macs2_2.9e9_minus_peak_1959	chr1	31741006	31741283	-	278	15	11	12	5	4	6	8	8	6	4	10	7
macs2_2.9e9_minus_peak_1960	chr1	31744403	31744668	-	266	26	10	16	22	9	8	11	15	10	8	17	11
macs2_2.9e9_minus_peak_1961	chr1	31746689	31747065	-	377	24	25	26	30	18	16	13	13	18	15	16	10
macs2_2.9e9_minus_peak_1962	chr1	31753500	31753974	-	475	25	24	21	12	8	13	18	21	26	14	15	20
macs2_2.9e9_minus_peak_1963	chr1	31758000	31758232	-	233	9	11	6	5	4	1	7	4	1	1	6	8
macs2_2.9e9_minus_peak_1964	chr1	31758970	31759404	-	435	43	34	22	39	20	19	18	20	26	14	25	18
macs2_2.9e9_minus_peak_1965	chr1	31759728	31759948	-	221	8	13	9	17	2	11	8	1	9	6	6	5
macs2_2.9e9_minus_peak_1966	chr1	31761391	31761655	-	265	46	44	29	49	30	19	21	26	29	19	43	42
macs2_2.9e9_minus_peak_1967	chr1	31762452	31762783	-	332	12	18	11	19	8	6	19	15	15	4	13	9
macs2_2.9e9_minus_peak_1968	chr1	31767072	31767293	-	222	2	8	6	3	2	0	5	1	4	4	4	7
macs2_2.9e9_minus_peak_1969	chr1	32022619	32022838	-	220	1	0	2	0	4	3	0	3	3	3	1	2
macs2_2.9e9_minus_peak_1970	chr1	32023475	32023686	-	212	2	2	1	0	0	0	0	1	0	0	0	0
macs2_2.9e9_minus_peak_1971	chr1	32033507	32033711	-	205	2	5	0	0	0	0	0	1	0	0	0	0
macs2_2.9e9_minus_peak_1972	chr1	32095330	32096034	-	705	466	388	451	427	171	302	260	290	384	356	256	287
macs2_2.9e9_minus_peak_1973	chr1	32102557	32102758	-	202	0	1	2	7	3	1	0	1	1	0	0	2
macs2_2.9e9_minus_peak_1974	chr1	32106252	32106669	-	418	19	7	4	13	8	8	4	1	6	3	5	4
macs2_2.9e9_minus_peak_1975	chr1	32107761	32107961	-	201	6	5	6	0	0	2	1	0	0	2	0	0
macs2_2.9e9_minus_peak_1976	chr1	32118037	32118268	-	232	0	0	0	2	0	1	0	0	1	3	2	0
macs2_2.9e9_minus_peak_1977	chr1	32192575	32193149	-	575	66	52	74	52	21	35	29	39	58	51	24	42
macs2_2.9e9_minus_peak_1978	chr1	32217136	32217598	-	463	36	40	69	77	32	40	78	54	127	100	31	116
macs2_2.9e9_minus_peak_1979	chr1	32218739	32219019	-	281	9	5	10	8	2	4	4	4	16	6	12	5
macs2_2.9e9_minus_peak_1980	chr1	32233603	32233810	-	208	0	0	1	2	1	0	0	0	0	3	1	1
macs2_2.9e9_minus_peak_1981	chr1	32255884	32256257	-	374	14	15	7	4	0	7	6	8	22	22	13	16
macs2_2.9e9_minus_peak_1982	chr1	32259960	32260228	-	269	3	10	2	2	2	3	0	2	9	5	5	4
macs2_2.9e9_minus_peak_1983	chr1	32274668	32274871	-	204	3	1	1	0	0	0	0	2	1	1	1	0
macs2_2.9e9_minus_peak_1984	chr1	32275833	32276102	-	270	2	3	2	5	1	2	0	1	4	0	7	0
macs2_2.9e9_minus_peak_1985	chr1	32352746	32353011	-	266	8	7	7	9	5	4	5	8	3	7	5	1
macs2_2.9e9_minus_peak_1986	chr1	32371910	32372378	-	469	343	309	313	359	140	262	135	203	200	288	135	282
macs2_2.9e9_minus_peak_1987	chr1	32373077	32373419	-	343	53	40	82	80	29	62	46	37	86	74	100	61
macs2_2.9e9_minus_peak_1988	chr1	32373730	32374515	-	786	1796	1485	1518	1863	1051	1342	904	1151	1760	1525	1990	1544
macs2_2.9e9_minus_peak_1989	chr1	32377151	32377391	-	241	257	245	246	303	193	219	167	208	320	295	335	300
macs2_2.9e9_minus_peak_1990	chr1	32379069	32379442	-	374	102	78	78	80	45	35	36	49	76	55	45	59
macs2_2.9e9_minus_peak_1991	chr1	32381045	32381563	-	519	74	66	70	77	45	48	34	51	85	50	92	62
macs2_2.9e9_minus_peak_1992	chr1	32384436	32384681	-	246	15	15	10	14	7	12	10	9	19	11	27	13
macs2_2.9e9_minus_peak_1993	chr1	32387979	32388593	-	615	123	101	81	89	47	45	50	69	85	46	41	34
macs2_2.9e9_minus_peak_1994	chr1	32395152	32395358	-	207	16	10	9	18	10	7	5	4	11	11	1	13
macs2_2.9e9_minus_peak_1995	chr1	32396463	32396727	-	265	23	19	15	31	12	6	12	9	45	37	42	36
macs2_2.9e9_minus_peak_1996	chr1	32398498	32398809	-	312	40	36	27	48	40	28	32	38	62	28	44	38
macs2_2.9e9_minus_peak_1997	chr1	32400642	32400935	-	294	22	13	16	23	10	15	11	3	18	18	15	18
macs2_2.9e9_minus_peak_1998	chr1	32401319	32401559	-	241	36	24	32	28	18	29	31	22	24	17	23	16
[truncated: 122,362 more rows]
