# Supplementary material for: The RNA-binding protein SFPQ preserves long-intron splicing and regulates circRNA biogenesis in mammals
Source: eLife. 2021 Jan 21;10:e63088. doi: 10.7554/eLife.63088 (PMC7819710; doi:10.7554/eLife.63088)
Supplement: Supplementary file 7. [file elife-63088-supp7.xlsx]

## Sheet: Primers etc
ID	Sequence (5'-3')	Note	Assay	Cat #	Company
SFPQ siRNA #1	GUACGAAUAUUCUCAGCGA[dT][dT]	Sense strand	siRNA	SASI_Hs01_00073164	Merck
SFPQ siRNA #1	UCGCUGAGAAUAUUCGUAC[dT][dT]	Antisense strand			Merck
SFPQ siRNA #2	GGAAGAUGCCUAUCAUGAA[dT][dT]	Sense strand		SASI_Hs01_00073165	Merck
SFPQ siRNA #2	UUCAUGAUAGGCAUCUUCC[dT][dT]	Antisense strand			Merck
NONO siRNA #1	GAUGGAAGCUGCACGCCAU[dT][dT]	Sense strand		SASI_Hs02_00343478	Merck
NONO siRNA #1	AUGGCGUGCAGCUUCCAUC[dT][dT]	Antisense strand			Merck
NONO siRNA #2	CUCAGUAUGUGUCCAACGA[dT][dT]	Sense strand		SASI_Hs02_00343479	Merck
NONO siRNA #2	UCGUUGGACACAUACUGAG[dT][dT]	Antisense strand			Merck
CTRL siRNA #1		MISSION-siRNA Universal Negative Control #1			Merck
CTRL siRNA #2	GACGUAAACGGCCACAAGUUC	Targets eGFP; Sense strand			RiboTask
CTRL siRNA #2	ACUUGUGGCCGUUUACGUCGC	Targets eGFP; Antisense strand			RiboTask
GAPDH FW	GTCAGCCGCATCTTCTTTTG		qPCR primers		Merck
GAPDH RE	GCGCCCAATACGACCAAATC				Merck
SFPQ FW	ACAGGGAAAGGCATTGTTGA				Merck
SFPQ RE	TCATCTAGTTGTTCAAGTGGTTCC				Merck
NONO FW	TGATGAAGAGGGACTTCCAGA				Merck
NONO RE	AGCGCATGGCATATTCATACT				Merck
CDYL FW	ACCCACTAGTGCCTCAGGTG				Merck
CDYL lin RE	ATTTCCTTTTGCTGGCAGTC				Merck
CDYL circ RE	CTCGCTGTCATAGCCTTTCC				Merck
ZKSCAN1 FW	CCCAGTCCCACTTCAAACAT				Merck
ZKSCAN1 lin RE	TCCGCTGTGAATAGTGCAGA				Merck
ZKSCAN1 circ RE	TCATTCAGGCTCCAGGAACT				Merck
NEIL3 FW	CAGCCCAATACTCATCACCA				Merck
NEIL3 lin RE	GAGGCGGTTGTGTTTACTGC				Merck
NEIL3 circ RE	CGGGTACTTCATTAAGTGGCTAA				Merck
EYA1 FW	CCAATGCCACTTACCAGCTT				Merck
EYA1 lin RE	TACTGCTCCCAATTGCTGAA				Merck
EYA1 circ RE	TTTCCCATCTGAACCTCGAC				Merck
ARHGAPH5 FW	CGTGTCAGCGGGAATAAAACT				Merck
ARHGAPH5 lin RE	TGGAATTAAAGGATCTGGCAGA				Merck
ARHGAPH5 circ RE	CCTGCAATCACTTCTGACCA				Merck
DENND1A Upstream FW	CCAAGTTTTGTTTCCCCTTC	Targets exon 4			Merck
DENND1A Upstream RE	AGAAGCAGCTCTTCGCTCCT	Targets exon 5			Merck
DENND1A Ex8 FW	ACCAGAGAACTTCCCAGCAT	Targets exon 8			Merck
DENND1A cSA RE	TGGGAGAGGGGAAATATGTG	Targets cryptic SA (intron 8)			Merck
DENND1A Downstream FW	AAGAGCAGCTGCCAAAGACT	Targets exon 19			Merck
DENND1A Downstream RE	GCGATGTTGCTCTTTGGTCT	Targets exon 20			Merck
U1 FW	GCTTATCCATTGCACTCCGG				Merck
U1 RE	CCCCACTACCACAAATTATGCA				Merck
circARHGAP5 intronic Ups FW	ATGGAATCATTGTGCTTTTC				Merck
circARHGAP5 intronic Ups RE	AATCTTAATCTGGCCCAACTGA				Merck
circARHGAP5 intronic Ds FW	GGCTAAAAGCTGATTATTTGAAAAG				Merck
circARHGAP5 intronic Ds RE	TACATTTTTCCAGGACTTTGTTCAT				Merck
ARHGAP5 exon 5 intronic Ups FW	TGTGGCTAAAACAGGGTGTG				Merck
ARHGAP5 exon 5 intronic Ups RE	AGGCACCTACAACCAACAGC				Merck
ARHGAP5 exon 5 intronic Ds FW	AATGCTGGGTCACTTTGGTC				Merck
ARHGAP5 exon 5 intronic Ds RE	CAGCCTGGTTCCTAACAAGC				Merck
circCDYL intronic Ups FW	TTTTGTCTTTGTTTAATGCCATTTC				Merck
circCDYL intronic Ups RE	GGCCAGACTGAGTATACATAAGGAA				Merck
circCDYL intronic Ds FW	TGACCTGCAAGCTCAGAATGG				Merck
circCDYL intronic Ds RE	GGATTGGTGGTGGAAGTAAAT				Merck
CDYL exon 7 intronic Ups FW	CTGGTTCCTTGTGCCTTGAT				Merck
CDYL exon 7 intronic Ups RE	TTTTCAGGGAATGGAACTG				Merck
CDYL exon 7 intronic Ds FW	CCTGCTCCTCACCTTCTCAC				Merck
CDYL exon 7intronic Ds RE	GTGCTGCTTGTTCCTCTCCT				Merck
circNEIL3 intronic Ups FW	TTCGAGGCTGCAGTGAACTA				Merck
circNEIL3 intronic Ups RE	TTGCCTTGTTCTTGTCTGGA				Merck
circNEIL3 intronic Ds FW	CGATCCAAGGTTGGTTGAAT				Merck
circNEIL3 intronic Ds RE	TTTACACCAAATGGTCCCTCA				Merck
NEIL3 exon 5intronic Ups FW	TACCCAAATCAGTAGGAATGAAGC				Merck
NEIL3 exon 5 intronic Ups RE	CATACTGAACTCACGTGTTCCAA				Merck
NEIL3 exon 5 intronic Ds FW	AACCTGAGGGAGCCAAAGAT				Merck
NEIL3 exon 5 intronic Ds RE	TGAAGCAGAGACTTTTGAAGG				Merck
circZKSCAN1 intronic Ups FW	ATGGCCAAGCTGGTCTTGAACTCC				Merck
circZKSCAN1 intronic Ups RE	CAGGAACAGCTGTATGAAATGG				Merck
circZKSCAN1 intronic Ds FW	TGGAACACTTAACCATGACTGG				Merck
circZKSCAN1 intronic Ds RE	CCATGCCTGGCTGATTTATTAT				Merck
ZKSCAN1 exon 4 intronic Ups FW	GCAACAGAGGGAGATGCTG				Merck
ZKSCAN1 exon 4 intronic Ups RE	GTGTGTGCCAGGATCTTTGA				Merck
ZKSCAN1 exon 4 intronic Ds FW	GAAAACTCACAGAATTGGAGAAA				Merck
ZKSCAN1 exon 4 intronic Ds RE	GGAGCCTTCAGAGGTCACAG				Merck
circEYA1 intronic Ups FW	CGGTCCATGGTTTTAAGAGTGA				Merck
circEYA1 intronic Ups RE	TGCAACACAAGAAAGGCTGA				Merck
circEYA1 intronic Ds FW	AGCCTTGTTGTGGAGTAGCT				Merck
circEYA1 intronic Ds RE	TCTTGTTTCCCATGCACACA				Merck
EYA1 exon 12 intronic Ups FW	CAGATTCTATTTTTGGCATGAGG				Merck
EYA1 exon 12 intronic Ups RE	GGGCAAGTAAACAATTTCCAA				Merck
EYA1 exon 12 intronic Ds FW	CTCCCATCTCCCACCCTTTC				Merck
EYA1 exon 12 intronic Ds RE	TCTCATCGAGCCTGGTTTGT				Merck
U1	ACAAATTATGCAGTCGAGTTTCCCACATTTGGGGAAATCGCAGGGGTCAGCACATCCGGA		Northern blot probe		Merck
7SK	TACTCGTATACCCTTGACCGAAGACCGGTCCTCCTCTATCGGGGATGGTC				Merck

## Sheet: Antibodies
ID	Note	Cat #	Company
Anti-SFPQ antibody (Polyclonal, Rabbit)	WB (1:5,000)	ab50935	Abcam
Anti-nmt55/ p54nrb antibody (Polyclonal, Rabbit)	WB (1:20,000), IP (2.5 ug)	ab70335	Abcam
Anti-SFPQ antibody (Monoclonal, Mouse)	IP (2.5 ug)	P2860	Sigma
Anti-FLAG antibody (Monoclonal, Mouse)	IP (2.5 ug)	F1804	Sigma
Anti-beta Tubulin (Monoclonal, Mouse)	WB (1:2,000)	NM_178014	Millipore
Anti-MYC (Polyclonal, Rabbit)	WB (1:5,000)	M4439	Sigma
Anti-Histone H3 antibody (Monoclonal, Rabbit)	WB (1:1,000)	ab1791	Abcam
Anti-Rabbit antibody (Polyclonal, Goat)	WB (1:5,000)	p0448	Dako
Anti-Mouse antibody (Polyclonal, Goat)	WB (1:5,000)	p0447	Dako
